# Supplementary material for: Integration of high-resolution promoter profiling assays reveals novel, cell type–specific transcription start sites across 115 human cell and tissue types
Source: HighWire-hosted journal article supplement (doi:10.1101/gr.275723.121), 2021-12-23
Supplement: Supplemental_Table_S1.xlsx [file Supplemental_Table_S1.xlsx]

## Sheet: Contents
Supplemental Table S1. Summary of RAMPAGE datasets and rPeaks
Supplemental Table S1A	Summary of RAMAPGE experiments
Supplemental Table S1B	RAMPAGE rPeaks
Supplemental Table S1C	Summary of peaks supporting RAMPAGE rPeak ZH38T0001231

## Sheet: Table S1A
Supplemental Table S1A. Summary of RAMPAGE experiments
Name	Biosample type	ENCODE ID RAMPAGE	ENCODE ID RNA	# RAMPAGE peaks
GM12878	cell line	ENCSR000AEI	ENCSR000AEC	10673
K562	cell line	ENCSR000AER	ENCSR000AEL	9508
urinary bladder female embryo (20 weeks) and female embryo (24 weeks)	tissue	ENCSR000AGJ	ENCSR000AEV	10577
cerebellum female embryo (19 weeks) and female embryo (37 weeks)	tissue	ENCSR000AGK	ENCSR000AEW	13595
diencephalon female embryo (20 weeks) and male embryo (22 weeks)	tissue	ENCSR000AGL	ENCSR000AEX	11222
frontal cortex female embryo (20 weeks) and male embryo (22 weeks)	tissue	ENCSR000AGM	ENCSR000AEY	12547
heart female embryo (19 weeks) and female embryo (28 weeks)	tissue	ENCSR000AGN	ENCSR000AEZ	10453
metanephros female embryo (20 weeks) and female embryo (24 weeks)	tissue	ENCSR000AGO	ENCSR000AFA	11140
liver female embryo (20 weeks) and male embryo (22 weeks)	tissue	ENCSR000AGP	ENCSR000AFB	9007
lung female embryo (20 weeks) and female embryo (24 weeks)	tissue	ENCSR000AGQ	ENCSR000AFC	12571
occipital lobe female embryo (20 weeks) and male embryo (22 weeks)	tissue	ENCSR000AGR	ENCSR000AFD	11954
parietal lobe female embryo (24 weeks) and male embryo (22 weeks)	tissue	ENCSR000AGS	ENCSR000AFE	12277
skeletal muscle tissue female embryo (19 weeks) and male embryo (22 weeks)	tissue	ENCSR000AGT	ENCSR000AFF	10512
skin of body female embryo (24 weeks) and male embryo (22 weeks)	tissue	ENCSR000AGU	ENCSR000AFG	12170
spinal cord female embryo (24 weeks) and male embryo (22 weeks)	tissue	ENCSR000AGV	ENCSR000AFH	12524
stomach female embryo (40 weeks) and male embryo (36 weeks)	tissue	ENCSR000AGW	ENCSR000AFI	10349
temporal lobe female embryo (20 weeks) and female embryo (24 weeks)	tissue	ENCSR000AGX	ENCSR000AFJ	12611
thyroid gland female embryo (37 weeks) and female embryo (40 weeks)	tissue	ENCSR000AGY	ENCSR000AFK	10826
tongue female embryo (20 weeks) and female embryo (24 weeks)	tissue	ENCSR000AGZ	ENCSR000AFL	10142
umbilical cord male embryo (20 weeks) and male embryo (31 week)	tissue	ENCSR000AHA	ENCSR000AFM	10718
SK-MEL-5 cytosolic fraction	cell line	ENCSR007RIV	ENCSR291DJH	7859
HT1080 cytosolic fraction	cell line	ENCSR022PAU	ENCSR166QLP	8236
gastrocnemius medialis female adult (51 year)	tissue	ENCSR024MNP	ENCSR609NZM	8042
gastroesophageal sphincter female adult (53 years)	tissue	ENCSR028GEI	ENCSR740YMS	9343
lower leg skin female adult (51 year)	tissue	ENCSR030CKH	ENCSR551NII	8493
sigmoid colon female adult (51 year)	tissue	ENCSR035MAJ	ENCSR827IXS	9420
SK-MEL-5	cell line	ENCSR054RIR	ENCSR669KQU	9335
thyroid gland male adult (54 years)	tissue	ENCSR069LRO	ENCSR023ZXN	9061
NCI-H460	cell line	ENCSR093UPQ	ENCSR164OCT	9353
kidney epithelial cell male embryo (22 weeks) and male newborn	primary cell	ENCSR100NLN	ENCSR373BDG	9970
esophagus squamous epithelium male adult (54 years)	tissue	ENCSR102OEK	ENCSR474TRG	8860
SJSA1	cell line	ENCSR108KHH	ENCSR880EGO	8210
esophagus squamous epithelium male adult (37 years)	tissue	ENCSR161GPD	ENCSR354QPN	10148
omental fat pad male adult (37 years)	tissue	ENCSR176WZV	ENCSR729CAZ	10947
Peyer's patch female adult (53 years)	tissue	ENCSR199XGY	ENCSR544SAU	10747
esophagus squamous epithelium female adult (51 year)	tissue	ENCSR201ARN	ENCSR510MIA	6622
vagina female adult (53 years)	tissue	ENCSR219EAT	ENCSR146LBD	6987
heart left ventricle female adult (51 year)	tissue	ENCSR226BLJ	ENCSR436QDU	7631
spleen female adult (53 years)	tissue	ENCSR236PTD	ENCSR900SGE	10922
NCI-H460 nuclear fraction	cell line	ENCSR239ZQA	ENCSR625QJI	10574
liver male adult (32 years)	tissue	ENCSR285LDX	ENCSR000AEU	11733
myometrial cell female adult (34 years)	primary cell	ENCSR290RXI	ENCSR371VGV	8006
sigmoid colon female adult (53 years)	tissue	ENCSR321NPB	ENCSR094GVZ	9826
spleen male adult (37 years)	tissue	ENCSR329YVA	ENCSR330UMQ	11144
smooth muscle cell originated from H9	in vitro differentiated cells	ENCSR337VPD	ENCSR052FJA	10699
body of pancreas female adult (53 years)	tissue	ENCSR366BLN	ENCSR586SYA	8868
epithelial cell of alveolus of lung NONE and female embryo (21 week)	primary cell	ENCSR376IXU	ENCSR897KTO	9226
GM23338 originated from GM23248	cell line	ENCSR410OSB	ENCSR938LSP	10465
subcutaneous adipose tissue female adult (53 years)	tissue	ENCSR419MZM	ENCSR504NIU	10770
pericardium fibroblast NONE and female embryo (20 weeks)	primary cell	ENCSR419VNG	ENCSR362HMX	9255
esophagus muscularis mucosa male adult (54 years)	tissue	ENCSR454ZQB	ENCSR750ETS	9962
gastrocnemius medialis male adult (37 years)	tissue	ENCSR458JVO	ENCSR853BNH	6722
heart left ventricle female adult (53 years)	tissue	ENCSR464UVO	ENCSR391VGU	8762
glomerular endothelial cell female embryo (22 weeks) and male embryo (22 weeks)	primary cell	ENCSR469ZUS	ENCSR878EUT	9542
omental fat pad female adult (53 years)	tissue	ENCSR472PZH	ENCSR645TCG	9632
thyroid gland female adult (51 year)	tissue	ENCSR477JQM	ENCSR687HJY	10989
SK-N-DZ nuclear fraction	cell line	ENCSR479BMI	ENCSR255NYQ	14171
suprapubic skin female adult (53 years)	tissue	ENCSR480WCN	ENCSR450ENK	7725
stomach female adult (51 year)	tissue	ENCSR497BYB	ENCSR853WOM	11580
suprapubic skin male adult (37 years)	tissue	ENCSR501EGS	ENCSR862RGX	7893
uterus female adult (53 years)	tissue	ENCSR502DKA	ENCSR113HQM	9474
SK-MEL-5 nuclear fraction	cell line	ENCSR506WDZ	ENCSR201WVA	14559
SJCRH30	cell line	ENCSR540YVD	ENCSR568YRP	10097
right lobe of liver female adult (53 years)	tissue	ENCSR543DIO	ENCSR226KML	6916
right atrium auricular region female adult (51 year)	tissue	ENCSR554TZR	ENCSR457ENP	9130
airway epithelial cell	primary cell	ENCSR582BUX	ENCSR822SUG	8015
breast epithelium female adult (51 year)	tissue	ENCSR598TAK	ENCSR438YPF	12465
ovary female adult (51 year)	tissue	ENCSR601URL	ENCSR042GYH	11331
neural progenitor cell originated from H9	in vitro differentiated cells	ENCSR602PHV	ENCSR244ISQ	10962
omental fat pad female adult (51 year)	tissue	ENCSR611YXR	ENCSR158KFO	9809
neural cell originated from H1	in vitro differentiated cells	ENCSR612EAO	ENCSR995JXE	11300
cardiac muscle cell originated from RUES2	in vitro differentiated cells	ENCSR613JNT	ENCSR379YAE	10538
suprapubic skin male adult (54 years)	tissue	ENCSR616JRI	ENCSR108MAU	8560
spleen male adult (54 years)	tissue	ENCSR627SPU	ENCSR106SZN	9621
thoracic aorta male adult (37 years)	tissue	ENCSR632GYF	ENCSR429EWK	7275
transverse colon male adult (54 years)	tissue	ENCSR649WDK	ENCSR630VJN	11682
prostate gland male adult (37 years)	tissue	ENCSR655HUL	ENCSR495HDM	11754
mammary microvascular endothelial cell female adult (26 years)	primary cell	ENCSR663WYF	ENCSR815UVL	8572
esophagus muscularis mucosa female adult (53 years)	tissue	ENCSR669JBL	ENCSR098BUF	6290
prostate gland male adult (54 years)	tissue	ENCSR671RMD	ENCSR701TST	6741
esophagus muscularis mucosa female adult (51 year)	tissue	ENCSR679TCM	ENCSR620LQN	6240
stomach female adult (53 years)	tissue	ENCSR686VRS	ENCSR752UNJ	11519
transverse colon male adult (37 years)	tissue	ENCSR688YRV	ENCSR653ZJF	8101
sigmoid colon male adult (37 years)	tissue	ENCSR698NAQ	ENCSR857WJK	8987
thyroid gland female adult (53 years)	tissue	ENCSR700YLA	ENCSR238ZZD	11591
tibial nerve female adult (53 years)	tissue	ENCSR706VZW	ENCSR858QEL	9736
gastrocnemius medialis female adult (53 years)	tissue	ENCSR710LGT	ENCSR678TMV	7748
Peyer's patch male adult (37 years)	tissue	ENCSR713KWE	ENCSR802HPM	7657
heart male adult (34 years)	tissue	ENCSR724SZY	ENCSR000AHH	12045
upper lobe of left lung male adult (37 years)	tissue	ENCSR738HKC	ENCSR313COD	9980
adrenal gland female adult (51 year)	tissue	ENCSR743LXD	ENCSR801MKV	9067
gastroesophageal sphincter female adult (51 year)	tissue	ENCSR779OWH	ENCSR035SKV	8651
subcutaneous adipose tissue female adult (51 year)	tissue	ENCSR785OGK	ENCSR150QJY	10656
SK-N-DZ treated with dimethyl sulfoxide for 72 hours	cell line	ENCSR786DTS	ENCSR136WGP	11258
upper lobe of left lung female adult (53 years)	tissue	ENCSR790PBX	ENCSR406SAW	11294
stomach male adult (37 years)	tissue	ENCSR792XFE	ENCSR471RUK	10960
NCI-H460 cytosolic fraction	cell line	ENCSR824YLV	ENCSR586SEE	7239
sigmoid colon male adult (54 years)	tissue	ENCSR833XGD	ENCSR812AKX	10915
testis male adult (37 years)	tissue	ENCSR841EQJ	ENCSR029KNZ	16207
tibial nerve female adult (51 year)	tissue	ENCSR848OYH	ENCSR272UNO	10943
SK-N-DZ cytosolic fraction	cell line	ENCSR852KOV	ENCSR569JKX	6735
transverse colon female adult (53 years)	tissue	ENCSR855GRG	ENCSR800WIY	12683
OCI-LY7	cell line	ENCSR855LXJ	ENCSR001HHK	11299
testis male adult (54 years)	tissue	ENCSR866SRG	ENCSR344MQK	17201
right atrium auricular region female adult (53 years)	tissue	ENCSR877SCS	ENCSR571RXE	9393
esophagus muscularis mucosa male adult (37 years)	tissue	ENCSR883KJV	ENCSR182CBU	9175
spleen female adult (51 year)	tissue	ENCSR887SSW	ENCSR194HVU	11403
body of pancreas female adult (51 year)	tissue	ENCSR918MVG	ENCSR671IYC	10064
esophagus squamous epithelium female adult (53 years)	tissue	ENCSR930RDW	ENCSR351OTL	7315
adrenal gland female adult (53 years)	tissue	ENCSR930XIH	ENCSR754WLW	10063
right lobe of liver female adult (53 years)	tissue	ENCSR941SAZ	ENCSR504QMK	7081
GM23248	cell line	ENCSR949PHV	ENCSR797BPP	8416
Peyer's patch male adult (54 years)	tissue	ENCSR954YVZ	ENCSR257NIR	10169
adrenal gland male adult (54 years)	tissue	ENCSR970OWZ	ENCSR954PZB	8625
ovary female adult (53 years)	tissue	ENCSR983ICQ	ENCSR841ADZ	8843

## Sheet: Table S1B
Supplemental Table S1B. RAMPAGE rPeaks
Chrom	Start	End	rPeak ID	Strand	High density start	High density end	Summit	Genomic context	Strand orientation
chr1	181079	181174	ZH38T0000001	-	181140	181156	181155	Intergenic	opposite
chr1	199844	199895	ZH38T0000002	-	199862	199875	199874	Intergenic	same
chr1	629622	629947	ZH38T0000003	+	629704	629930	629770	TSS	same
chr1	631374	631418	ZH38T0000004	-	631393	631394	631393	Proximal	opposite
chr1	633708	633760	ZH38T0000005	+	633724	633726	633725	Proximal	same
chr1	633821	634034	ZH38T0000006	+	633905	634001	633905	Proximal	same
chr1	634351	634412	ZH38T0000007	+	634364	634393	634377	TSS	same
chr1	778557	778727	ZH38T0000008	-	778621	778672	778634	TSS	same
chr1	778771	778940	ZH38T0000009	+	778804	778913	778818	TSS	same
chr1	827293	827574	ZH38T0000010	-	827436	827522	827521	TSS	same
chr1	827592	827874	ZH38T0000011	+	827658	827721	827720	TSS	same
chr1	831520	831650	ZH38T0000012	+	831581	831617	831584	Intron	same
chr1	847188	847288	ZH38T0000013	+	847269	847270	847269	Intron	same
chr1	876813	876975	ZH38T0000014	-	876855	876919	876885	TSS	same
chr1	904770	904903	ZH38T0000015	+	904812	904860	904859	TSS	same
chr1	925577	925662	ZH38T0000016	-	925601	925609	925603	Proximal	opposite
chr1	959218	959310	ZH38T0000017	-	959250	959277	959276	TSS	same
chr1	966431	966558	ZH38T0000018	+	966458	966510	966489	TSS	same
chr1	974945	975084	ZH38T0000019	+	974952	975064	975030	Exon	same
chr1	976648	976725	ZH38T0000020	-	976662	976690	976688	Intron	same
chr1	982071	982149	ZH38T0000021	-	982088	982117	982101	TSS	same
chr1	982466	982607	ZH38T0000022	+	982509	982586	982509	Proximal	opposite
chr1	1000425	1000526	ZH38T0000023	+	1000463	1000514	1000463	Proximal	opposite
chr1	1000686	1000902	ZH38T0000024	-	1000713	1000857	1000834	Proximal	opposite
chr1	1013422	1013562	ZH38T0000025	+	1013492	1013497	1013496	TSS	same
chr1	1059666	1059754	ZH38T0000026	+	1059699	1059730	1059729	TSS	same
chr1	1064319	1064544	ZH38T0000027	+	1064393	1064488	1064413	Intron	same
chr1	1116062	1116129	ZH38T0000028	-	1116080	1116107	1116099	TSS	same
chr1	1128601	1128735	ZH38T0000029	+	1128619	1128725	1128649	Intergenic	same
chr1	1131355	1131442	ZH38T0000030	-	1131382	1131426	1131425	Intergenic	opposite
chr1	1133455	1133553	ZH38T0000031	-	1133475	1133499	1133482	Intergenic	opposite
chr1	1162808	1162896	ZH38T0000032	+	1162819	1162881	1162877	Intergenic	same
chr1	1165765	1165903	ZH38T0000033	+	1165807	1165884	1165883	Intergenic	same
chr1	1167168	1167209	ZH38T0000034	+	1167182	1167183	1167182	Proximal	same
chr1	1173861	1173940	ZH38T0000035	+	1173882	1173916	1173897	TSS	same
chr1	1179612	1179757	ZH38T0000036	+	1179667	1179691	1179690	TSS	same
chr1	1212955	1213098	ZH38T0000037	-	1213009	1213049	1213028	Exon	same
chr1	1214110	1214167	ZH38T0000038	-	1214130	1214153	1214152	TSS	same
chr1	1218751	1218939	ZH38T0000039	-	1218769	1218905	1218838	Exon	same
chr1	1223243	1223347	ZH38T0000040	-	1223276	1223334	1223276	Exon	same
chr1	1231897	1232120	ZH38T0000041	-	1231981	1232058	1231989	TSS	same
chr1	1244328	1244440	ZH38T0000042	-	1244361	1244414	1244413	Exon	same
chr1	1273979	1274072	ZH38T0000043	+	1274009	1274039	1274025	Proximal	opposite
chr1	1308603	1308659	ZH38T0000044	+	1308616	1308627	1308620	Proximal	same
chr1	1309560	1309637	ZH38T0000045	-	1309570	1309611	1309576	Exon	opposite
chr1	1309773	1309902	ZH38T0000046	-	1309803	1309874	1309839	Exon	opposite
chr1	1324574	1324735	ZH38T0000047	-	1324619	1324660	1324640	TSS	same
chr1	1324768	1324961	ZH38T0000048	+	1324801	1324906	1324801	TSS	same
chr1	1325205	1325308	ZH38T0000049	+	1325225	1325263	1325231	Proximal	same
chr1	1325317	1325409	ZH38T0000050	+	1325337	1325370	1325337	Intron	same
chr1	1358506	1358591	ZH38T0000051	-	1358532	1358555	1358532	TSS	same
chr1	1375130	1375432	ZH38T0000052	-	1375181	1375297	1375212	TSS	same
chr1	1399297	1399398	ZH38T0000053	-	1399316	1399339	1399316	TSS	same
chr1	1399505	1399625	ZH38T0000054	+	1399519	1399567	1399563	TSS	same
chr1	1407121	1407343	ZH38T0000055	-	1407222	1407290	1407246	TSS	same
chr1	1420090	1420165	ZH38T0000056	-	1420118	1420138	1420132	Proximal	opposite
chr1	1421225	1421355	ZH38T0000057	-	1421238	1421308	1421278	TSS	same
chr1	1421424	1421480	ZH38T0000058	-	1421436	1421468	1421436	TSS	same
chr1	1425844	1425925	ZH38T0000059	+	1425870	1425896	1425870	Proximal	same
chr1	1435564	1435635	ZH38T0000060	-	1435592	1435612	1435592	Proximal	opposite
chr1	1435676	1435747	ZH38T0000061	+	1435695	1435716	1435715	TSS	same
chr1	1456849	1456979	ZH38T0000062	+	1456882	1456965	1456927	Intron	same
chr1	1540293	1540401	ZH38T0000063	-	1540307	1540347	1540307	TSS	same
chr1	1542660	1542771	ZH38T0000064	-	1542678	1542735	1542709	Intron	same
chr1	1574477	1574674	ZH38T0000065	-	1574586	1574643	1574586	TSS	same
chr1	1615437	1615515	ZH38T0000066	+	1615475	1615500	1615499	TSS	same
chr1	1615750	1615826	ZH38T0000067	-	1615784	1615799	1615796	TSS	same
chr1	1627528	1627628	ZH38T0000068	+	1627555	1627597	1627596	Intron	same
chr1	1631660	1631726	ZH38T0000069	+	1631671	1631702	1631681	Proximal	same
chr1	1655358	1655492	ZH38T0000070	-	1655369	1655411	1655409	Exon	same
chr1	1658910	1659039	ZH38T0000071	-	1658954	1659008	1659000	TSS	same
chr1	1659058	1659139	ZH38T0000072	-	1659084	1659116	1659096	Proximal	same
chr1	1659148	1659292	ZH38T0000073	-	1659187	1659271	1659199	Proximal	same
chr1	1692450	1692535	ZH38T0000074	-	1692479	1692518	1692506	Proximal	same
chr1	1692699	1692886	ZH38T0000075	-	1692708	1692811	1692750	TSS	same
chr1	1724221	1724460	ZH38T0000076	-	1724314	1724339	1724326	TSS	same
chr1	1724482	1724596	ZH38T0000077	-	1724511	1724574	1724511	TSS	opposite
chr1	1745737	1745840	ZH38T0000078	-	1745754	1745818	1745781	Proximal	same
chr1	1745962	1746108	ZH38T0000079	-	1745991	1746065	1746005	TSS	same
chr1	1758028	1758171	ZH38T0000080	-	1758132	1758153	1758133	Intron	same
chr1	1758847	1758959	ZH38T0000081	-	1758887	1758938	1758887	Intron	same
chr1	1778817	1778896	ZH38T0000082	-	1778830	1778886	1778830	Proximal	same
chr1	1779949	1780120	ZH38T0000083	-	1779981	1780033	1780030	TSS	same
chr1	1780429	1780485	ZH38T0000084	-	1780468	1780469	1780468	Proximal	same
chr1	1780497	1780545	ZH38T0000085	-	1780513	1780533	1780513	Proximal	same
chr1	1785623	1785806	ZH38T0000086	-	1785658	1785766	1785765	Exon	same
chr1	1785864	1785961	ZH38T0000087	-	1785876	1785888	1785887	Exon	same
chr1	1787310	1787446	ZH38T0000088	-	1787324	1787426	1787399	Exon	same
chr1	1790394	1790515	ZH38T0000089	-	1790461	1790500	1790499	Exon	same
chr1	1890018	1890102	ZH38T0000090	-	1890063	1890091	1890063	Intron	same
chr1	1890255	1890351	ZH38T0000091	-	1890276	1890304	1890303	Intron	same
chr1	1890376	1890479	ZH38T0000092	-	1890412	1890445	1890442	Intron	same
chr1	1890816	1890919	ZH38T0000093	-	1890857	1890901	1890884	Proximal	same
chr1	1891058	1891136	ZH38T0000094	-	1891075	1891109	1891090	TSS	same
chr1	1892217	1892278	ZH38T0000095	-	1892226	1892267	1892236	Exon	opposite
chr1	1914987	1915435	ZH38T0000096	+	1915050	1915317	1915084	TSS	same
chr1	1915583	1915743	ZH38T0000097	+	1915616	1915672	1915616	Intron	same
chr1	1919054	1919234	ZH38T0000098	-	1919070	1919183	1919072	Proximal	same
chr1	1989081	1989178	ZH38T0000099	-	1989105	1989143	1989109	Intron	same
chr1	2003746	2003865	ZH38T0000100	-	2003792	2003847	2003800	TSS	same
chr1	2048495	2048574	ZH38T0000101	+	2048524	2048551	2048550	Intergenic	opposite
chr1	2073594	2073922	ZH38T0000102	+	2073612	2073800	2073700	Proximal	same
chr1	2074020	2074126	ZH38T0000103	+	2074026	2074091	2074083	Intron	same
chr1	2111607	2111714	ZH38T0000104	+	2111645	2111674	2111653	Intron	same
chr1	2145331	2145451	ZH38T0000105	+	2145383	2145405	2145386	Proximal	opposite
chr1	2174460	2174579	ZH38T0000106	+	2174490	2174556	2174494	Intron	same
chr1	2180263	2180344	ZH38T0000107	+	2180282	2180320	2180288	Intron	same
chr1	2194690	2194758	ZH38T0000108	-	2194716	2194723	2194722	Proximal	same
chr1	2355206	2355331	ZH38T0000109	+	2355222	2355288	2355287	Exon	opposite
chr1	2391515	2391614	ZH38T0000110	-	2391541	2391561	2391541	TSS	same
chr1	2391630	2391753	ZH38T0000111	-	2391660	2391707	2391670	TSS	same
chr1	2391788	2391925	ZH38T0000112	+	2391826	2391862	2391826	TSS	same
chr1	2416426	2416527	ZH38T0000113	+	2416476	2416510	2416499	Intergenic	opposite
chr1	2427624	2427738	ZH38T0000114	+	2427634	2427690	2427689	Intergenic	opposite
chr1	2428665	2428763	ZH38T0000115	+	2428684	2428719	2428700	Intergenic	opposite
chr1	2467453	2467502	ZH38T0000116	+	2467465	2467483	2467482	TSS	same
chr1	2526557	2526628	ZH38T0000117	-	2526599	2526604	2526599	TSS	same
chr1	2530246	2530283	ZH38T0000118	-	2530265	2530266	2530265	TSS	same
chr1	2546384	2546433	ZH38T0000119	+	2546399	2546400	2546399	Exon	same
chr1	2554225	2554307	ZH38T0000120	+	2554243	2554284	2554283	Proximal	opposite
chr1	2555746	2555866	ZH38T0000121	+	2555773	2555847	2555846	Proximal	same
chr1	2555931	2555999	ZH38T0000122	+	2555958	2555972	2555970	Proximal	same
chr1	2556347	2556444	ZH38T0000123	+	2556394	2556430	2556394	TSS	same
chr1	2556528	2556624	ZH38T0000124	+	2556556	2556569	2556556	Proximal	same
chr1	2556960	2557139	ZH38T0000125	-	2556998	2557058	2557047	TSS	same
chr1	2557489	2557652	ZH38T0000126	+	2557535	2557632	2557535	Intron	same
chr1	2559632	2559964	ZH38T0000127	+	2559666	2559882	2559711	Intron	same
chr1	2586771	2586956	ZH38T0000128	+	2586817	2586943	2586817	TSS	same
chr1	2587045	2587170	ZH38T0000129	+	2587085	2587113	2587095	Proximal	same
chr1	2592834	2592905	ZH38T0000130	-	2592847	2592890	2592847	Exon	same
chr1	2633008	2633122	ZH38T0000131	-	2633041	2633109	2633058	TSS	same
chr1	2643259	2643387	ZH38T0000132	+	2643283	2643351	2643298	Intron	opposite
chr1	2813993	2814075	ZH38T0000133	+	2814055	2814057	2814055	TSS	same
chr1	3021441	3021543	ZH38T0000134	+	3021488	3021516	3021512	TSS	same
chr1	3063680	3063797	ZH38T0000135	-	3063690	3063784	3063733	Intergenic	same
chr1	3068836	3068887	ZH38T0000136	-	3068865	3068871	3068870	Proximal	opposite
chr1	3069143	3069271	ZH38T0000137	+	3069167	3069228	3069179	TSS	same
chr1	3116352	3116389	ZH38T0000138	+	3116369	3116371	3116369	Intron	same
chr1	3269094	3269238	ZH38T0000139	+	3269147	3269225	3269216	Intron	same
chr1	3269701	3269967	ZH38T0000140	+	3269752	3269945	3269754	Intron	same
chr1	3270236	3270455	ZH38T0000141	+	3270270	3270443	3270289	Intron	same
chr1	3270486	3270653	ZH38T0000142	+	3270540	3270622	3270540	Intron	same
chr1	3279526	3279607	ZH38T0000143	+	3279546	3279583	3279582	Intron	same
chr1	3421802	3421901	ZH38T0000144	+	3421826	3421852	3421841	Intron	same
chr1	3421964	3422087	ZH38T0000145	+	3422037	3422050	3422049	Intron	same
chr1	3422088	3422188	ZH38T0000146	+	3422103	3422119	3422118	Intron	same
chr1	3454645	3454691	ZH38T0000147	+	3454664	3454676	3454664	TSS	same
chr1	3624666	3624798	ZH38T0000148	-	3624749	3624786	3624778	TSS	same
chr1	3650022	3650121	ZH38T0000149	-	3650072	3650103	3650102	TSS	same
chr1	3652537	3652637	ZH38T0000150	+	3652565	3652604	3652565	TSS	same
chr1	3669044	3669129	ZH38T0000151	+	3669060	3669090	3669085	Proximal	opposite
chr1	3707521	3707593	ZH38T0000152	+	3707531	3707566	3707562	Exon	same
chr1	3747315	3747406	ZH38T0000153	-	3747325	3747375	3747374	TSS	same
chr1	3752382	3752492	ZH38T0000154	+	3752418	3752461	3752449	TSS	same
chr1	3772717	3772869	ZH38T0000155	+	3772749	3772839	3772838	TSS	same
chr1	3796474	3796529	ZH38T0000156	-	3796490	3796509	3796501	TSS	same
chr1	3831109	3831145	ZH38T0000157	-	3831127	3831128	3831127	Exon	same
chr1	3857246	3857321	ZH38T0000158	+	3857264	3857298	3857264	TSS	same
chr1	3857445	3857528	ZH38T0000159	+	3857460	3857507	3857506	Proximal	same
chr1	3900171	3900305	ZH38T0000160	-	3900220	3900275	3900245	TSS	same
chr1	3901291	3901369	ZH38T0000161	-	3901304	3901337	3901325	Intron	opposite
chr1	3901456	3901534	ZH38T0000162	+	3901496	3901520	3901503	Intron	same
chr1	3903308	3903474	ZH38T0000163	-	3903336	3903450	3903358	Intron	opposite
chr1	3976123	3976159	ZH38T0000164	+	3976135	3976143	3976142	TSS	same
chr1	5100053	5100174	ZH38T0000165	+	5100121	5100132	5100128	Intergenic	opposite
chr1	5771412	5771483	ZH38T0000166	-	5771452	5771468	5771467	Intergenic	same
chr1	5891971	5892100	ZH38T0000167	+	5891999	5892085	5892024	Intron	opposite
chr1	5917902	5917987	ZH38T0000168	+	5917921	5917970	5917937	Intron	opposite
chr1	5992335	5992503	ZH38T0000169	-	5992366	5992430	5992419	TSS	same
chr1	5992632	5992748	ZH38T0000170	+	5992653	5992711	5992693	TSS	same
chr1	6002960	6003055	ZH38T0000171	+	6003018	6003041	6003022	Intron	same
chr1	6016536	6016664	ZH38T0000172	+	6016570	6016633	6016609	Intron	same
chr1	6026128	6026219	ZH38T0000173	-	6026144	6026168	6026164	TSS	opposite
chr1	6026202	6026416	ZH38T0000174	+	6026260	6026373	6026332	TSS	same
chr1	6045987	6046222	ZH38T0000175	+	6046075	6046179	6046113	TSS	same
chr1	6179938	6180111	ZH38T0000176	-	6179985	6180060	6180011	Proximal	same
chr1	6197646	6197772	ZH38T0000177	-	6197688	6197745	6197711	TSS	same
chr1	6199477	6199824	ZH38T0000178	-	6199581	6199596	6199595	TSS	same
chr1	6200500	6200762	ZH38T0000179	-	6200559	6200658	6200657	Proximal	same
chr1	6200795	6200928	ZH38T0000180	-	6200853	6200879	6200859	TSS	same
chr1	6205921	6206063	ZH38T0000181	-	6206004	6206037	6206013	Proximal	same
chr1	6206013	6206189	ZH38T0000182	+	6206081	6206136	6206115	TSS	same
chr1	6208662	6208702	ZH38T0000183	-	6208681	6208682	6208681	Intron	opposite
chr1	6208753	6208876	ZH38T0000184	-	6208786	6208821	6208786	Intron	opposite
chr1	6208840	6208986	ZH38T0000185	+	6208850	6208954	6208885	Exon	same
chr1	6209243	6209391	ZH38T0000186	-	6209326	6209374	6209371	Exon	opposite
chr1	6281189	6281279	ZH38T0000187	-	6281199	6281268	6281218	Exon	same
chr1	6358908	6359019	ZH38T0000188	-	6358928	6358973	6358949	Proximal	same
chr1	6360654	6360739	ZH38T0000189	-	6360689	6360707	6360706	TSS	same
chr1	6385717	6385851	ZH38T0000190	-	6385770	6385822	6385804	TSS	same
chr1	6393257	6393442	ZH38T0000191	-	6393353	6393412	6393376	TSS	same
chr1	6419898	6419969	ZH38T0000192	-	6419914	6419921	6419914	TSS	same
chr1	6450317	6450467	ZH38T0000193	+	6450381	6450450	6450381	Intron	same
chr1	6451233	6451363	ZH38T0000194	+	6451270	6451307	6451298	Intron	same
chr1	6474240	6474300	ZH38T0000195	-	6474251	6474273	6474261	Intron	same
chr1	6485403	6485500	ZH38T0000196	-	6485440	6485479	6485471	TSS	same
chr1	6485864	6486025	ZH38T0000197	-	6485933	6485973	6485953	TSS	same
chr1	6486053	6486152	ZH38T0000198	-	6486092	6486134	6486102	Proximal	same
chr1	6490493	6490640	ZH38T0000199	-	6490507	6490598	6490574	TSS	same
chr1	6491649	6491729	ZH38T0000200	-	6491666	6491704	6491703	TSS	same
chr1	6506243	6506348	ZH38T0000201	-	6506263	6506300	6506299	Intron	same
chr1	6579975	6580088	ZH38T0000202	+	6579993	6580024	6580000	TSS	same
chr1	6599722	6599823	ZH38T0000203	+	6599770	6599778	6599770	Intron	opposite
chr1	6602850	6602894	ZH38T0000204	-	6602868	6602869	6602868	TSS	same
chr1	6603077	6603179	ZH38T0000205	+	6603106	6603157	6603115	Proximal	opposite
chr1	6603488	6603563	ZH38T0000206	+	6603503	6603504	6603503	Proximal	opposite
chr1	6613115	6613208	ZH38T0000207	-	6613143	6613195	6613143	Intron	same
chr1	6613710	6613794	ZH38T0000208	+	6613730	6613760	6613742	TSS	same
chr1	6625138	6625254	ZH38T0000209	+	6625173	6625216	6625196	TSS	same
chr1	6701732	6701935	ZH38T0000210	-	6701803	6701830	6701821	TSS	same
chr1	6785431	6785578	ZH38T0000211	+	6785450	6785493	6785473	TSS	same
chr1	7299305	7299419	ZH38T0000212	-	7299343	7299377	7299355	Intron	opposite
chr1	7389866	7389978	ZH38T0000213	-	7389908	7389966	7389926	Proximal	same
chr1	7491198	7491266	ZH38T0000214	-	7491224	7491251	7491229	Intron	opposite
chr1	7669703	7669776	ZH38T0000215	+	7669714	7669754	7669729	Intron	same
chr1	7704791	7704880	ZH38T0000216	+	7704804	7704867	7704866	Intron	same
chr1	7728270	7728393	ZH38T0000217	+	7728294	7728366	7728338	Intron	same
chr1	7771250	7771390	ZH38T0000218	+	7771280	7771320	7771295	TSS	same
chr1	7780699	7780892	ZH38T0000219	+	7780710	7780850	7780796	Exon	same
chr1	7784272	7784449	ZH38T0000220	+	7784294	7784362	7784317	TSS	same
chr1	7826547	7826671	ZH38T0000221	+	7826561	7826649	7826561	Exon	same
chr1	7827317	7827404	ZH38T0000222	-	7827328	7827367	7827332	TSS	same
chr1	7827376	7827494	ZH38T0000223	+	7827400	7827440	7827412	Proximal	opposite
chr1	7852996	7853115	ZH38T0000224	-	7853065	7853068	7853065	TSS	same
chr1	7913212	7913284	ZH38T0000225	-	7913248	7913268	7913267	Intergenic	same
chr1	7940817	7940888	ZH38T0000226	-	7940836	7940849	7940838	TSS	same
chr1	7954132	7954219	ZH38T0000227	-	7954142	7954191	7954189	Intergenic	opposite
chr1	7954271	7954306	ZH38T0000228	+	7954285	7954290	7954289	Intergenic	same
chr1	7961578	7961800	ZH38T0000229	+	7961662	7961719	7961710	TSS	same
chr1	7961911	7961975	ZH38T0000230	+	7961934	7961954	7961953	TSS	same
chr1	7962752	7962884	ZH38T0000231	+	7962776	7962863	7962776	Exon	same
chr1	7965317	7965429	ZH38T0000232	+	7965326	7965396	7965371	Exon	same
chr1	8012751	8012992	ZH38T0000233	-	8012776	8012938	8012811	Exon	same
chr1	8013589	8014385	ZH38T0000234	-	8013669	8014156	8013705	Exon	same
chr1	8026165	8026219	ZH38T0000235	-	8026179	8026208	8026192	Proximal	same
chr1	8026268	8026334	ZH38T0000236	-	8026311	8026312	8026311	TSS	same
chr1	8026412	8026556	ZH38T0000237	+	8026444	8026493	8026492	Proximal	same
chr1	8195011	8195046	ZH38T0000238	-	8195028	8195029	8195028	Intergenic	opposite
chr1	8318077	8318168	ZH38T0000239	+	8318103	8318146	8318113	Proximal	same
chr1	8352958	8353224	ZH38T0000240	-	8353021	8353186	8353185	Exon	same
chr1	8353228	8353344	ZH38T0000241	-	8353244	8353320	8353287	Exon	same
chr1	8358228	8358685	ZH38T0000242	-	8358333	8358655	8358639	Exon	same
chr1	8359893	8360012	ZH38T0000243	-	8359925	8359998	8359925	Exon	same
chr1	8360106	8360376	ZH38T0000244	-	8360119	8360278	8360267	Exon	same
chr1	8423612	8423740	ZH38T0000245	-	8423668	8423718	8423668	TSS	same
chr1	8424075	8424160	ZH38T0000246	-	8424092	8424140	8424113	Proximal	same
chr1	8424169	8424298	ZH38T0000247	-	8424208	8424276	8424239	Intron	same
chr1	8424802	8424927	ZH38T0000248	-	8424841	8424899	8424884	Intron	same
chr1	8427797	8427847	ZH38T0000249	+	8427810	8427819	8427818	Intron	same
chr1	8525879	8526054	ZH38T0000250	-	8525912	8526035	8525952	TSS	same
chr1	8656259	8656513	ZH38T0000251	-	8656332	8656420	8656332	TSS	same
chr1	8703092	8703285	ZH38T0000252	-	8703122	8703265	8703247	Intron	same
chr1	8790612	8790681	ZH38T0000253	-	8790625	8790662	8790627	Intron	same
chr1	8797675	8797744	ZH38T0000254	-	8797690	8797715	8797707	Intron	same
chr1	8816858	8816904	ZH38T0000255	-	8816874	8816875	8816874	Proximal	same
chr1	8817150	8817297	ZH38T0000256	-	8817166	8817253	8817185	TSS	same
chr1	8817570	8817731	ZH38T0000257	-	8817641	8817696	8817664	TSS	same
chr1	8861211	8861441	ZH38T0000258	-	8861234	8861425	8861424	Exon	same
chr1	8861220	8861255	ZH38T0000259	+	8861235	8861239	8861238	Exon	opposite
chr1	8861259	8861331	ZH38T0000260	+	8861276	8861313	8861307	Exon	opposite
chr1	8863227	8863352	ZH38T0000261	-	8863246	8863321	8863298	Exon	same
chr1	8863883	8864103	ZH38T0000262	-	8863909	8864065	8863924	Exon	same
chr1	8866274	8866407	ZH38T0000263	-	8866284	8866393	8866392	Proximal	same
chr1	8875354	8875470	ZH38T0000264	-	8875373	8875441	8875418	Intron	same
chr1	8878567	8878768	ZH38T0000265	-	8878655	8878695	8878689	TSS	same
chr1	8878775	8878866	ZH38T0000266	+	8878804	8878835	8878834	TSS	same
chr1	8879128	8879274	ZH38T0000267	-	8879161	8879258	8879161	Proximal	opposite
chr1	8945797	8945907	ZH38T0000268	+	8945864	8945868	8945867	TSS	same
chr1	9069485	9069666	ZH38T0000269	-	9069544	9069600	9069544	TSS	same
chr1	9069676	9069848	ZH38T0000270	-	9069690	9069763	9069697	TSS	same
chr1	9071683	9071771	ZH38T0000271	-	9071703	9071741	9071720	Intergenic	same
chr1	9072163	9072301	ZH38T0000272	-	9072216	9072262	9072236	Intergenic	same
chr1	9088374	9088509	ZH38T0000273	-	9088414	9088464	9088446	Intergenic	opposite
chr1	9151674	9151708	ZH38T0000274	-	9151690	9151691	9151690	Proximal	same
chr1	9182137	9182252	ZH38T0000275	+	9182174	9182229	9182228	TSS	same
chr1	9182264	9182437	ZH38T0000276	-	9182292	9182385	9182374	TSS	same
chr1	9239674	9239772	ZH38T0000277	+	9239713	9239756	9239713	Proximal	same
chr1	9242718	9242903	ZH38T0000278	+	9242734	9242851	9242825	Intron	same
chr1	9311224	9311287	ZH38T0000279	+	9311242	9311263	9311242	Intron	same
chr1	9428799	9428929	ZH38T0000280	-	9428812	9428914	9428878	Proximal	same
chr1	9438188	9438288	ZH38T0000281	+	9438220	9438263	9438250	Proximal	opposite
chr1	9451171	9451237	ZH38T0000282	-	9451217	9451221	9451217	Intergenic	same
chr1	9503356	9503409	ZH38T0000283	-	9503379	9503382	9503379	Proximal	same
chr1	9503458	9503544	ZH38T0000284	-	9503472	9503528	9503495	TSS	same
chr1	9539633	9539719	ZH38T0000285	+	9539653	9539677	9539659	Proximal	same
chr1	9555570	9555650	ZH38T0000286	+	9555581	9555614	9555613	Intron	same
chr1	9629943	9630063	ZH38T0000287	+	9629972	9630038	9629972	Intergenic	same
chr1	9651686	9651800	ZH38T0000288	+	9651730	9651744	9651730	TSS	same
chr1	9687347	9687624	ZH38T0000289	-	9687537	9687583	9687543	TSS	same
chr1	9731200	9731395	ZH38T0000290	-	9731236	9731365	9731327	Exon	same
chr1	9731751	9731906	ZH38T0000291	-	9731787	9731890	9731794	Exon	same
chr1	9733394	9733480	ZH38T0000292	-	9733408	9733447	9733408	Exon	same
chr1	9733986	9734150	ZH38T0000293	-	9734007	9734129	9734110	Exon	same
chr1	9751468	9751699	ZH38T0000294	-	9751484	9751687	9751632	Exon	same
chr1	9755120	9755321	ZH38T0000295	-	9755159	9755300	9755205	Exon	same
chr1	9850614	9850701	ZH38T0000296	+	9850630	9850669	9850666	Exon	opposite
chr1	9872763	9872873	ZH38T0000297	-	9872807	9872858	9872855	Intron	same
chr1	9877924	9877987	ZH38T0000298	-	9877946	9877969	9877946	Proximal	same
chr1	9942803	9942874	ZH38T0000299	+	9942813	9942854	9942853	Proximal	same
chr1	9942982	9943145	ZH38T0000300	-	9942997	9943108	9943026	Proximal	same
chr1	9943235	9943427	ZH38T0000301	-	9943319	9943381	9943341	TSS	same
chr1	9943398	9943503	ZH38T0000302	+	9943433	9943472	9943453	TSS	same
chr1	9997038	9997133	ZH38T0000303	+	9997051	9997083	9997082	Proximal	same
chr1	9997164	9997336	ZH38T0000304	+	9997227	9997232	9997231	TSS	same
chr1	10032697	10032789	ZH38T0000305	-	10032723	10032777	10032764	Proximal	opposite
chr1	10032925	10033041	ZH38T0000306	+	10032943	10032959	10032957	TSS	same
chr1	10033090	10033283	ZH38T0000307	+	10033158	10033238	10033212	TSS	same
chr1	10072109	10072219	ZH38T0000308	+	10072154	10072205	10072154	Exon	same
chr1	10210294	10210377	ZH38T0000309	-	10210330	10210362	10210340	Proximal	opposite
chr1	10210518	10210585	ZH38T0000310	+	10210529	10210543	10210538	Proximal	same
chr1	10295633	10295786	ZH38T0000311	+	10295671	10295745	10295744	Exon	same
chr1	10296895	10296977	ZH38T0000312	+	10296937	10296951	10296937	Exon	same
chr1	10398635	10398803	ZH38T0000313	-	10398680	10398736	10398680	Proximal	opposite
chr1	10398990	10399129	ZH38T0000314	+	10399040	10399076	10399063	TSS	same
chr1	10399421	10399533	ZH38T0000315	+	10399438	10399485	10399448	Proximal	same
chr1	10425945	10425977	ZH38T0000316	-	10425960	10425961	10425960	Intergenic	opposite
chr1	10430361	10430571	ZH38T0000317	+	10430408	10430453	10430432	TSS	same
chr1	10430697	10430819	ZH38T0000318	+	10430727	10430777	10430751	TSS	same
chr1	10449984	10450302	ZH38T0000319	+	10450102	10450157	10450135	Proximal	same
chr1	10472407	10472580	ZH38T0000320	-	10472483	10472526	10472489	TSS	same
chr1	10474874	10475002	ZH38T0000321	+	10474938	10474975	10474954	TSS	same
chr1	10622896	10623015	ZH38T0000322	+	10622919	10622957	10622954	Intron	same
chr1	10623021	10623079	ZH38T0000323	+	10623036	10623043	10623041	Exon	same
chr1	10651132	10651168	ZH38T0000324	-	10651150	10651151	10651150	Exon	opposite
chr1	10654791	10655048	ZH38T0000325	-	10654854	10655002	10654914	Intron	same
chr1	10689218	10689404	ZH38T0000326	-	10689250	10689393	10689363	Intron	same
chr1	10694288	10694472	ZH38T0000327	-	10694302	10694442	10694426	Intron	same
chr1	10754335	10754509	ZH38T0000328	-	10754367	10754493	10754431	Intron	same
chr1	10758173	10758335	ZH38T0000329	-	10758249	10758307	10758299	Intron	same
chr1	10785173	10785233	ZH38T0000330	-	10785213	10785220	10785213	Intron	same
chr1	10795552	10795783	ZH38T0000331	-	10795649	10795713	10795685	Intron	same
chr1	10796565	10796762	ZH38T0000332	-	10796585	10796657	10796618	TSS	same
chr1	10815417	10815448	ZH38T0000333	+	10815432	10815433	10815432	Intergenic	opposite
chr1	11012610	11012751	ZH38T0000334	+	11012650	11012661	11012658	TSS	same
chr1	11047153	11047319	ZH38T0000335	-	11047228	11047241	11047238	TSS	same
chr1	11055004	11055092	ZH38T0000336	-	11055036	11055075	11055074	Exon	same
chr1	11060219	11060348	ZH38T0000337	+	11060227	11060322	11060282	Proximal	opposite
chr1	11071005	11071153	ZH38T0000338	-	11071021	11071073	11071036	Exon	opposite
chr1	11099744	11099931	ZH38T0000339	-	11099841	11099869	11099850	TSS	same
chr1	11189319	11189380	ZH38T0000340	+	11189354	11189355	11189354	TSS	same
chr1	11262447	11262574	ZH38T0000341	-	11262516	11262540	11262538	TSS	same
chr1	11262778	11262886	ZH38T0000342	+	11262814	11262860	11262816	Proximal	opposite
chr1	11273178	11273257	ZH38T0000343	+	11273203	11273223	11273222	TSS	same
chr1	11273447	11273537	ZH38T0000344	+	11273465	11273510	11273509	TSS	same
chr1	11339880	11339960	ZH38T0000345	-	11339925	11339946	11339930	Intergenic	same
chr1	11479090	11479204	ZH38T0000346	+	11479154	11479155	11479154	TSS	same
chr1	11609447	11609524	ZH38T0000347	+	11609505	11609506	11609505	TSS	same
chr1	11649784	11649852	ZH38T0000348	-	11649802	11649830	11649802	Exon	same
chr1	11654331	11654471	ZH38T0000349	-	11654363	11654429	11654428	TSS	same
chr1	11654836	11654948	ZH38T0000350	+	11654864	11654899	11654881	TSS	same
chr1	11664058	11664256	ZH38T0000351	+	11664089	11664227	11664196	TSS	same
chr1	11664307	11664401	ZH38T0000352	+	11664324	11664366	11664324	Proximal	same
chr1	11680586	11680624	ZH38T0000353	-	11680602	11680603	11680602	Exon	same
chr1	11681055	11681202	ZH38T0000354	-	11681108	11681141	11681126	TSS	same
chr1	11691442	11691598	ZH38T0000355	-	11691492	11691559	11691544	TSS	same
chr1	11691758	11691881	ZH38T0000356	-	11691785	11691832	11691828	Proximal	same
chr1	11691977	11692136	ZH38T0000357	-	11692021	11692068	11692044	Proximal	same
chr1	11736056	11736207	ZH38T0000358	+	11736121	11736175	11736162	TSS	same
chr1	11762136	11762277	ZH38T0000359	+	11762192	11762227	11762192	Proximal	same
chr1	11787679	11787940	ZH38T0000360	+	11787692	11787853	11787786	Exon	opposite
chr1	11803491	11803612	ZH38T0000361	-	11803517	11803541	11803536	TSS	same
chr1	11805882	11806034	ZH38T0000362	-	11805906	11805964	11805936	Proximal	opposite
chr1	11806083	11806285	ZH38T0000363	+	11806105	11806246	11806245	TSS	same
chr1	11845782	11845819	ZH38T0000364	+	11845800	11845801	11845800	Proximal	same
chr1	11847365	11847413	ZH38T0000365	+	11847383	11847386	11847385	Proximal	same
chr1	11847519	11848191	ZH38T0000366	-	11847784	11847785	11847784	TSS	same
chr1	11847570	11847609	ZH38T0000367	+	11847585	11847592	11847591	Proximal	same
chr1	11848307	11848454	ZH38T0000368	-	11848356	11848412	11848356	TSS	same
chr1	11858360	11858406	ZH38T0000369	+	11858387	11858389	11858387	Exon	opposite
chr1	11858801	11859022	ZH38T0000370	-	11858943	11858945	11858944	TSS	same
chr1	11908132	11908185	ZH38T0000371	+	11908151	11908152	11908151	TSS	same
chr1	11909903	11909943	ZH38T0000372	-	11909924	11909925	11909924	TSS	same
chr1	11934650	11934840	ZH38T0000373	+	11934688	11934731	11934730	TSS	same
chr1	11980172	11980377	ZH38T0000374	+	11980208	11980338	11980232	TSS	same
chr1	11980402	11980509	ZH38T0000375	+	11980443	11980449	11980448	Proximal	same
chr1	11983518	11983695	ZH38T0000376	+	11983571	11983650	11983646	Intron	same
chr1	11984740	11984812	ZH38T0000377	+	11984757	11984766	11984765	Intron	same
chr1	11996153	11996327	ZH38T0000378	+	11996164	11996308	11996263	Exon	same
chr1	12019425	12019583	ZH38T0000379	+	12019475	12019539	12019500	TSS	same
chr1	12063890	12064110	ZH38T0000380	+	12063905	12064058	12064023	Intron	same
chr1	12125861	12125965	ZH38T0000381	+	12125886	12125955	12125898	TSS	same
chr1	12230000	12230122	ZH38T0000382	+	12230031	12230094	12230035	TSS	same
chr1	12342607	12343008	ZH38T0000383	+	12342789	12342938	12342917	Intron	same
chr1	12388319	12388404	ZH38T0000384	+	12388332	12388373	12388372	Intron	same
chr1	12409797	12409883	ZH38T0000385	+	12409815	12409855	12409854	Intron	same
chr1	12464876	12464971	ZH38T0000386	+	12464936	12464958	12464947	TSS	same
chr1	12465014	12465108	ZH38T0000387	+	12465033	12465097	12465074	Proximal	same
chr1	12496994	12497048	ZH38T0000388	+	12497028	12497030	12497029	Intron	same
chr1	12578711	12578958	ZH38T0000389	-	12578769	12578934	12578769	Proximal	same
chr1	12580612	12580690	ZH38T0000390	-	12580644	12580656	12580655	Exon	same
chr1	12585398	12585454	ZH38T0000391	-	12585415	12585422	12585421	Intron	same
chr1	12596044	12596155	ZH38T0000392	-	12596069	12596113	12596077	Intron	same
chr1	12616586	12616723	ZH38T0000393	-	12616620	12616704	12616703	Intron	same
chr1	12616759	12616833	ZH38T0000394	-	12616771	12616820	12616771	Intron	same
chr1	12617157	12617453	ZH38T0000395	-	12617227	12617396	12617257	Exon	same
chr1	12617585	12617756	ZH38T0000396	-	12617598	12617679	12617678	Exon	same
chr1	12618048	12618336	ZH38T0000397	-	12618135	12618256	12618208	TSS	same
chr1	12618366	12618540	ZH38T0000398	+	12618428	12618475	12618438	Proximal	opposite
chr1	12618585	12618687	ZH38T0000399	-	12618611	12618644	12618643	Proximal	same
chr1	12619002	12619128	ZH38T0000400	-	12619045	12619110	12619108	Proximal	same
chr1	12619909	12620003	ZH38T0000401	-	12619947	12619982	12619975	Intergenic	same
chr1	12746164	12746307	ZH38T0000402	+	12746193	12746224	12746199	TSS	same
chr1	12898270	12898315	ZH38T0000403	-	12898293	12898294	12898293	TSS	same
chr1	13487753	13487851	ZH38T0000404	+	13487779	13487830	13487829	Intron	opposite
chr1	13583681	13584111	ZH38T0000405	+	13583831	13583832	13583831	TSS	same
chr1	13584179	13584314	ZH38T0000406	+	13584216	13584273	13584269	TSS	same
chr1	13731105	13731199	ZH38T0000407	+	13731116	13731184	13731183	Intron	same
chr1	13749336	13749487	ZH38T0000408	+	13749377	13749435	13749414	TSS	same
chr1	13773116	13773193	ZH38T0000409	+	13773131	13773182	13773145	Exon	same
chr1	13778372	13778618	ZH38T0000410	+	13778406	13778593	13778406	Exon	same
chr1	13829047	13829137	ZH38T0000411	+	13829079	13829122	13829098	Intergenic	same
chr1	13893147	13893242	ZH38T0000412	+	13893185	13893227	13893209	Proximal	same
chr1	13893515	13893619	ZH38T0000413	+	13893566	13893593	13893592	Exon	same
chr1	14304366	14304503	ZH38T0000414	-	14304407	14304465	14304464	TSS	same
chr1	14320716	14320849	ZH38T0000415	+	14320728	14320791	14320737	Intron	same
chr1	14321646	14321691	ZH38T0000416	+	14321673	14321674	14321673	Intron	same
chr1	14419955	14420031	ZH38T0000417	-	14419972	14419973	14419972	TSS	same
chr1	14598331	14598452	ZH38T0000418	-	14598343	14598409	14598392	Proximal	opposite
chr1	15152416	15152548	ZH38T0000419	-	15152441	15152475	15152474	TSS	same
chr1	15152516	15152579	ZH38T0000420	+	15152532	15152568	15152543	TSS	same
chr1	15152742	15152845	ZH38T0000421	+	15152802	15152815	15152814	Proximal	same
chr1	15172227	15172404	ZH38T0000422	+	15172308	15172366	15172308	Intron	same
chr1	15236464	15236559	ZH38T0000423	+	15236501	15236534	15236515	Intergenic	same
chr1	15247244	15247331	ZH38T0000424	+	15247263	15247294	15247271	TSS	same
chr1	15340590	15340699	ZH38T0000425	+	15340614	15340669	15340614	Intron	same
chr1	15341687	15341850	ZH38T0000426	+	15341744	15341801	15341766	Exon	same
chr1	15345017	15345224	ZH38T0000427	+	15345095	15345133	15345123	Exon	same
chr1	15358989	15359080	ZH38T0000428	+	15359010	15359051	15359044	Intron	same
chr1	15409323	15409486	ZH38T0000429	-	15409414	15409456	15409434	TSS	same
chr1	15409859	15409944	ZH38T0000430	+	15409879	15409910	15409894	TSS	same
chr1	15425857	15426029	ZH38T0000431	+	15425873	15426001	15425969	Exon	same
chr1	15427142	15427272	ZH38T0000432	+	15427157	15427234	15427211	Exon	same
chr1	15438352	15438714	ZH38T0000433	+	15438438	15438443	15438442	TSS	same
chr1	15442437	15442471	ZH38T0000434	-	15442453	15442454	15442453	Exon	opposite
chr1	15456633	15456795	ZH38T0000435	+	15456731	15456732	15456731	TSS	same
chr1	15465847	15465963	ZH38T0000436	+	15465876	15465910	15465895	Intron	same
chr1	15476074	15476165	ZH38T0000437	+	15476103	15476104	15476103	TSS	same
chr1	15493992	15494197	ZH38T0000438	-	15494067	15494142	15494108	Intron	same
chr1	15524180	15524292	ZH38T0000439	-	15524222	15524264	15524232	TSS	same
chr1	15526817	15526925	ZH38T0000440	+	15526847	15526880	15526868	TSS	same
chr1	15588498	15588569	ZH38T0000441	-	15588513	15588520	15588519	Intron	same
chr1	15603662	15603777	ZH38T0000442	+	15603718	15603751	15603718	Proximal	opposite
chr1	15667799	15667837	ZH38T0000443	+	15667819	15667823	15667819	Exon	same
chr1	15681456	15681535	ZH38T0000444	+	15681484	15681516	15681505	Intergenic	opposite
chr1	15725235	15725271	ZH38T0000445	+	15725249	15725257	15725256	Intron	same
chr1	15736195	15736329	ZH38T0000446	+	15736274	15736296	15736295	TSS	same
chr1	15736889	15736969	ZH38T0000447	-	15736908	15736953	15736917	TSS	same
chr1	15742481	15742605	ZH38T0000448	+	15742500	15742593	15742500	TSS	same
chr1	15751858	15751987	ZH38T0000449	+	15751894	15751949	15751900	Intergenic	opposite
chr1	15756549	15756717	ZH38T0000450	+	15756609	15756641	15756634	TSS	same
chr1	15757900	15758023	ZH38T0000451	+	15757946	15757991	15757990	Intron	same
chr1	15758745	15758847	ZH38T0000452	+	15758776	15758810	15758794	TSS	same
chr1	15800197	15800321	ZH38T0000453	-	15800228	15800269	15800262	Intergenic	opposite
chr1	15807643	15807713	ZH38T0000454	-	15807675	15807697	15807696	Exon	same
chr1	15834297	15834423	ZH38T0000455	-	15834307	15834375	15834374	Intergenic	opposite
chr1	15834818	15834972	ZH38T0000456	-	15834887	15834940	15834921	Exon	same
chr1	15835090	15835181	ZH38T0000457	+	15835123	15835167	15835157	Exon	opposite
chr1	15835835	15835912	ZH38T0000458	-	15835855	15835860	15835859	Exon	same
chr1	15836078	15836143	ZH38T0000459	+	15836094	15836117	15836094	Exon	opposite
chr1	15847093	15847197	ZH38T0000460	+	15847138	15847185	15847151	Intron	opposite
chr1	15847447	15847553	ZH38T0000461	-	15847463	15847527	15847511	Proximal	opposite
chr1	15847962	15848050	ZH38T0000462	+	15847972	15848020	15848003	Proximal	same
chr1	15849352	15849474	ZH38T0000463	-	15849371	15849423	15849419	Intron	opposite
chr1	15976063	15976136	ZH38T0000464	-	15976078	15976101	15976100	TSS	same
chr1	16004216	16004260	ZH38T0000465	+	16004228	16004238	16004235	TSS	same
chr1	16014143	16014389	ZH38T0000466	-	16014155	16014343	16014342	Exon	same
chr1	16015502	16015570	ZH38T0000467	+	16015545	16015551	16015550	Exon	opposite
chr1	16015609	16015769	ZH38T0000468	-	16015647	16015750	16015647	Exon	same
chr1	16017716	16018101	ZH38T0000469	-	16018040	16018046	16018045	TSS	same
chr1	16018703	16018805	ZH38T0000470	-	16018733	16018779	16018778	TSS	same
chr1	16020422	16020498	ZH38T0000471	-	16020468	16020479	16020470	Intergenic	same
chr1	16043752	16043889	ZH38T0000472	+	16043797	16043858	16043820	TSS	same
chr1	16048774	16048879	ZH38T0000473	+	16048798	16048862	16048837	TSS	same
chr1	16048952	16049033	ZH38T0000474	+	16048991	16049002	16048995	Proximal	same
chr1	16155150	16155264	ZH38T0000475	+	16155162	16155223	16155214	TSS	same
chr1	16156154	16156191	ZH38T0000476	+	16156171	16156175	16156171	Proximal	opposite
chr1	16206967	16207062	ZH38T0000477	-	16206979	16207023	16207020	Exon	same
chr1	16210167	16210292	ZH38T0000478	-	16210206	16210264	16210263	Intron	same
chr1	16212581	16212693	ZH38T0000479	-	16212617	16212668	16212644	TSS	same
chr1	16217214	16217440	ZH38T0000480	-	16217293	16217396	16217293	Proximal	same
chr1	16237120	16237198	ZH38T0000481	-	16237138	16237185	16237172	TSS	same
chr1	16352392	16352511	ZH38T0000482	-	16352435	16352473	16352441	TSS	same
chr1	16352529	16352625	ZH38T0000483	+	16352563	16352606	16352605	Proximal	opposite
chr1	16367177	16367315	ZH38T0000484	+	16367226	16367237	16367230	TSS	same
chr1	16440640	16440785	ZH38T0000485	+	16440712	16440742	16440741	TSS	same
chr1	16443624	16443718	ZH38T0000486	+	16443642	16443677	16443663	Exon	same
chr1	16499208	16499291	ZH38T0000487	-	16499239	16499259	16499256	TSS	same
chr1	16514201	16514304	ZH38T0000488	-	16514284	16514285	16514284	TSS	same
chr1	16514593	16514709	ZH38T0000489	+	16514639	16514683	16514658	TSS	same
chr1	16545995	16546031	ZH38T0000490	-	16546014	16546015	16546014	Intergenic	same
chr1	16608425	16608648	ZH38T0000491	+	16608480	16608623	16608622	Exon	opposite
chr1	16613403	16613617	ZH38T0000492	-	16613526	16613564	16613537	TSS	same
chr1	16628882	16628978	ZH38T0000493	-	16628893	16628955	16628919	Intron	same
chr1	16644628	16644757	ZH38T0000494	-	16644661	16644718	16644694	Intron	same
chr1	16644685	16644857	ZH38T0000495	+	16644723	16644790	16644778	Intron	opposite
chr1	16645406	16645570	ZH38T0000496	-	16645470	16645506	16645498	Proximal	opposite
chr1	16645548	16645674	ZH38T0000497	+	16645594	16645621	16645602	TSS	same
chr1	16686177	16686262	ZH38T0000498	-	16686212	16686249	16686236	Proximal	same
chr1	16697238	16697300	ZH38T0000499	-	16697250	16697284	16697283	Intron	same
chr1	16727260	16727297	ZH38T0000500	+	16727278	16727279	16727278	Intergenic	opposite
chr1	16735454	16735490	ZH38T0000501	-	16735471	16735472	16735471	Intergenic	opposite
chr1	16765231	16765330	ZH38T0000502	-	16765257	16765294	16765293	Intron	same
chr1	16861900	16861940	ZH38T0000503	+	16861914	16861915	16861914	Intergenic	opposite
chr1	16889359	16889529	ZH38T0000504	-	16889392	16889501	16889411	TSS	same
chr1	16889594	16889697	ZH38T0000505	-	16889621	16889672	16889656	Proximal	same
chr1	16895540	16895646	ZH38T0000506	-	16895582	16895626	16895623	Proximal	opposite
chr1	16895714	16895834	ZH38T0000507	+	16895724	16895794	16895793	Proximal	same
chr1	16895962	16896041	ZH38T0000508	+	16895979	16895980	16895979	TSS	same
chr1	16904770	16904874	ZH38T0000509	-	16904806	16904859	16904834	TSS	same
chr1	16905179	16905220	ZH38T0000510	+	16905198	16905199	16905198	Proximal	opposite
chr1	16911860	16911951	ZH38T0000511	+	16911887	16911917	16911916	Intergenic	opposite
chr1	16914054	16914123	ZH38T0000512	+	16914067	16914106	16914084	Intergenic	same
chr1	16921862	16922010	ZH38T0000513	+	16921889	16921931	16921930	TSS	same
chr1	16939565	16939677	ZH38T0000514	+	16939595	16939664	16939614	Intron	same
chr1	16980383	16980710	ZH38T0000515	-	16980613	16980650	16980623	Proximal	same
chr1	16981010	16981214	ZH38T0000516	-	16981067	16981187	16981087	Proximal	same
chr1	16981472	16981708	ZH38T0000517	-	16981569	16981637	16981569	Intron	opposite
chr1	17053947	17054199	ZH38T0000518	-	17054034	17054054	17054045	TSS	same
chr1	17119277	17119477	ZH38T0000519	-	17119450	17119457	17119450	TSS	same
chr1	17205074	17205316	ZH38T0000520	+	17205124	17205135	17205124	TSS	same
chr1	17236587	17236662	ZH38T0000521	+	17236606	17236631	17236606	Intron	same
chr1	17249077	17249123	ZH38T0000522	+	17249092	17249094	17249093	TSS	same
chr1	17308145	17308250	ZH38T0000523	+	17308194	17308197	17308196	TSS	same
chr1	17439262	17439355	ZH38T0000524	-	17439273	17439328	17439327	Proximal	same
chr1	17439623	17439778	ZH38T0000525	-	17439670	17439749	17439670	TSS	same
chr1	17439860	17439950	ZH38T0000526	+	17439872	17439937	17439936	Proximal	opposite
chr1	17441451	17441560	ZH38T0000527	-	17441474	17441541	17441474	Intergenic	same
chr1	17513316	17513478	ZH38T0000528	+	17513328	17513416	17513372	Intergenic	same
chr1	17520125	17520399	ZH38T0000529	+	17520155	17520333	17520304	Intergenic	same
chr1	17539318	17539416	ZH38T0000530	+	17539339	17539391	17539367	Proximal	same
chr1	17580101	17580273	ZH38T0000531	+	17580150	17580183	17580179	Proximal	same
chr1	17580374	17580568	ZH38T0000532	+	17580446	17580489	17580453	TSS	same
chr1	17588359	17588471	ZH38T0000533	+	17588388	17588434	17588388	Intron	same
chr1	17618305	17618430	ZH38T0000534	+	17618344	17618393	17618344	TSS	same
chr1	17755267	17755412	ZH38T0000535	+	17755312	17755373	17755334	TSS	same
chr1	18115692	18115765	ZH38T0000536	+	18115705	18115737	18115705	Exon	same
chr1	18414948	18415024	ZH38T0000537	-	18415001	18415007	18415006	Intergenic	opposite
chr1	18480989	18481035	ZH38T0000538	+	18481007	18481013	18481012	Proximal	same
chr1	18722277	18722393	ZH38T0000539	+	18722326	18722329	18722326	Intron	same
chr1	18724178	18724342	ZH38T0000540	+	18724230	18724321	18724282	Intron	same
chr1	18902508	18902623	ZH38T0000541	-	18902525	18902555	18902549	TSS	same
chr1	18925284	18925621	ZH38T0000542	-	18925334	18925547	18925429	Intron	same
chr1	18935899	18936152	ZH38T0000543	-	18935948	18936079	18936029	Intron	same
chr1	19007511	19007581	ZH38T0000544	-	19007549	19007567	19007555	Intergenic	same
chr1	19011107	19011156	ZH38T0000545	-	19011139	19011140	19011139	Intergenic	same
chr1	19058440	19058476	ZH38T0000546	-	19058458	19058460	19058458	Intergenic	same
chr1	19079753	19079858	ZH38T0000547	-	19079770	19079845	19079770	Intron	same
chr1	19081588	19081692	ZH38T0000548	-	19081625	19081671	19081649	Exon	same
chr1	19179051	19179132	ZH38T0000549	-	19179078	19179100	19179078	Exon	same
chr1	19201710	19201826	ZH38T0000550	-	19201723	19201776	19201723	Exon	same
chr1	19210229	19210351	ZH38T0000551	-	19210255	19210301	19210265	TSS	same
chr1	19210325	19210551	ZH38T0000552	+	19210394	19210499	19210394	TSS	same
chr1	19251427	19251577	ZH38T0000553	-	19251517	19251542	19251526	TSS	same
chr1	19251524	19251711	ZH38T0000554	+	19251549	19251594	19251588	TSS	opposite
chr1	19251755	19251866	ZH38T0000555	+	19251794	19251824	19251804	TSS	same
chr1	19287976	19288145	ZH38T0000556	+	19288004	19288110	19288065	Intron	opposite
chr1	19288696	19288831	ZH38T0000557	-	19288767	19288770	19288769	TSS	same
chr1	19312253	19312362	ZH38T0000558	+	19312281	19312327	19312305	TSS	same
chr1	19338960	19339101	ZH38T0000559	-	19338970	19339062	19339033	Exon	same
chr1	19484355	19484472	ZH38T0000560	+	19484384	19484409	19484402	TSS	same
chr1	19485433	19485601	ZH38T0000561	-	19485489	19485541	19485510	TSS	same
chr1	19596895	19597109	ZH38T0000562	+	19596989	19597035	19597026	TSS	same
chr1	19655339	19655433	ZH38T0000563	+	19655380	19655419	19655413	Exon	same
chr1	19657902	19657984	ZH38T0000564	+	19657919	19657970	19657919	Exon	same
chr1	19657988	19658033	ZH38T0000565	+	19658002	19658019	19658015	Exon	same
chr1	19658059	19658167	ZH38T0000566	+	19658082	19658155	19658082	Exon	same
chr1	19755643	19755795	ZH38T0000567	-	19755701	19755758	19755707	Exon	same
chr1	19771454	19771627	ZH38T0000568	-	19771471	19771556	19771525	Intron	same
chr1	19787032	19787115	ZH38T0000569	-	19787062	19787069	19787062	Exon	same
chr1	19799661	19799751	ZH38T0000570	-	19799699	19799730	19799717	Proximal	same
chr1	19799849	19799956	ZH38T0000571	-	19799873	19799926	19799915	TSS	same
chr1	19815087	19815306	ZH38T0000572	-	19815155	19815278	19815277	TSS	same
chr1	19975681	19975718	ZH38T0000573	+	19975695	19975696	19975695	Exon	opposite
chr1	19978722	19978864	ZH38T0000574	-	19978740	19978813	19978740	Exon	same
chr1	19979517	19979696	ZH38T0000575	-	19979617	19979618	19979617	TSS	same
chr1	19980347	19980378	ZH38T0000576	-	19980361	19980363	19980362	Proximal	same
chr1	19980385	19980474	ZH38T0000577	-	19980415	19980440	19980415	TSS	same
chr1	19983998	19984034	ZH38T0000578	-	19984014	19984015	19984014	Intergenic	same
chr1	20028347	20028577	ZH38T0000579	+	20028407	20028516	20028515	Intergenic	same
chr1	20029468	20029502	ZH38T0000580	-	20029484	20029488	20029484	Intergenic	opposite
chr1	20070124	20070288	ZH38T0000581	+	20070169	20070205	20070190	TSS	same
chr1	20070310	20070358	ZH38T0000582	+	20070320	20070346	20070345	Proximal	same
chr1	20080718	20080786	ZH38T0000583	+	20080760	20080771	20080760	Intron	same
chr1	20119519	20119570	ZH38T0000584	-	20119532	20119539	20119538	TSS	same
chr1	20139301	20139376	ZH38T0000585	+	20139322	20139329	20139322	TSS	same
chr1	20183291	20183377	ZH38T0000586	+	20183330	20183361	20183330	Intergenic	same
chr1	20186052	20186150	ZH38T0000587	+	20186098	20186128	20186108	TSS	same
chr1	20186391	20186601	ZH38T0000588	-	20186472	20186542	20186472	TSS	same
chr1	20303033	20303133	ZH38T0000589	+	20303046	20303114	20303069	Intron	same
chr1	20484409	20484760	ZH38T0000590	-	20484532	20484705	20484665	Intron	same
chr1	20486040	20486339	ZH38T0000591	-	20486212	20486265	20486240	TSS	same
chr1	20508031	20508183	ZH38T0000592	-	20508123	20508155	20508154	TSS	same
chr1	20552468	20552607	ZH38T0000593	+	20552520	20552573	20552520	TSS	same
chr1	20588874	20589181	ZH38T0000594	+	20589057	20589119	20589099	TSS	same
chr1	20637899	20637998	ZH38T0000595	+	20637921	20637978	20637977	Exon	same
chr1	20650779	20651025	ZH38T0000596	+	20650823	20650960	20650959	Exon	same
chr1	20653620	20653784	ZH38T0000597	-	20653634	20653752	20653709	Exon	same
chr1	20661343	20661540	ZH38T0000598	-	20661364	20661388	20661364	TSS	same
chr1	20685082	20685233	ZH38T0000599	-	20685108	20685163	20685162	Intron	same
chr1	20685262	20685413	ZH38T0000600	-	20685285	20685334	20685297	Intron	same
chr1	20686342	20686418	ZH38T0000601	-	20686354	20686404	20686403	Intron	same
chr1	20732199	20732375	ZH38T0000602	+	20732245	20732297	20732251	Proximal	opposite
chr1	20745540	20745668	ZH38T0000603	-	20745549	20745616	20745597	Exon	same
chr1	20747534	20747663	ZH38T0000604	-	20747549	20747645	20747549	Exon	same
chr1	20779821	20779909	ZH38T0000605	-	20779841	20779891	20779841	Exon	same
chr1	20780349	20780531	ZH38T0000606	-	20780373	20780386	20780385	Exon	same
chr1	20786612	20786713	ZH38T0000607	-	20786660	20786681	20786668	TSS	same
chr1	20786715	20786864	ZH38T0000608	-	20786745	20786821	20786768	Proximal	same
chr1	20787185	20787348	ZH38T0000609	-	20787292	20787327	20787309	Intergenic	same
chr1	21013057	21013185	ZH38T0000610	-	21013074	21013143	21013102	Intron	same
chr1	21176867	21176911	ZH38T0000611	-	21176879	21176893	21176892	TSS	same
chr1	21177220	21177372	ZH38T0000612	-	21177298	21177347	21177320	Proximal	same
chr1	21261885	21261995	ZH38T0000613	-	21261930	21261977	21261930	Intron	same
chr1	21262066	21262104	ZH38T0000614	+	21262082	21262088	21262082	Intron	opposite
chr1	21279515	21279625	ZH38T0000615	-	21279533	21279599	21279533	TSS	same
chr1	21290192	21290291	ZH38T0000616	-	21290210	21290261	21290210	TSS	same
chr1	21290358	21290501	ZH38T0000617	-	21290422	21290463	21290423	TSS	same
chr1	21345370	21345553	ZH38T0000618	-	21345485	21345510	21345503	TSS	same
chr1	21345618	21345731	ZH38T0000619	+	21345639	21345678	21345673	Proximal	opposite
chr1	21440109	21440185	ZH38T0000620	+	21440121	21440151	21440133	TSS	same
chr1	21508646	21508760	ZH38T0000621	+	21508680	21508746	21508701	Intergenic	same
chr1	21508906	21509011	ZH38T0000622	+	21508943	21508984	21508980	Proximal	same
chr1	21509337	21509498	ZH38T0000623	+	21509420	21509426	21509425	TSS	same
chr1	21551006	21551243	ZH38T0000624	-	21551069	21551168	21551162	Proximal	opposite
chr1	21551219	21551400	ZH38T0000625	+	21551266	21551351	21551266	TSS	same
chr1	21575890	21575920	ZH38T0000626	-	21575904	21575905	21575904	Exon	opposite
chr1	21596982	21597154	ZH38T0000627	-	21596991	21597143	21597120	Exon	same
chr1	21617409	21617460	ZH38T0000628	-	21617442	21617443	21617442	Exon	same
chr1	21651783	21651882	ZH38T0000629	-	21651803	21651866	21651840	TSS	same
chr1	21669245	21669435	ZH38T0000630	-	21669319	21669357	21669327	TSS	same
chr1	21704298	21704400	ZH38T0000631	-	21704356	21704379	21704377	Exon	same
chr1	21706460	21706668	ZH38T0000632	-	21706579	21706606	21706600	Exon	same
chr1	21782935	21783181	ZH38T0000633	-	21783095	21783139	21783123	TSS	same
chr1	21783212	21783327	ZH38T0000634	+	21783257	21783291	21783271	Proximal	opposite
chr1	21835528	21835646	ZH38T0000635	-	21835539	21835604	21835577	Exon	same
chr1	21836800	21837008	ZH38T0000636	-	21836811	21836933	21836853	Exon	same
chr1	21843286	21843441	ZH38T0000637	-	21843301	21843425	21843424	Exon	same
chr1	21844143	21844294	ZH38T0000638	-	21844184	21844279	21844278	Exon	same
chr1	21859825	21860009	ZH38T0000639	-	21859845	21859972	21859864	Exon	same
chr1	21861747	21861851	ZH38T0000640	-	21861762	21861795	21861765	Exon	same
chr1	21887980	21888015	ZH38T0000641	+	21887997	21887998	21887997	Exon	opposite
chr1	21889979	21890161	ZH38T0000642	-	21890034	21890135	21890106	Exon	same
chr1	21890414	21890498	ZH38T0000643	-	21890427	21890483	21890482	Exon	same
chr1	21976795	21977155	ZH38T0000644	+	21977020	21977028	21977020	TSS	same
chr1	21983743	21983784	ZH38T0000645	-	21983763	21983764	21983763	Proximal	opposite
chr1	22001620	22001738	ZH38T0000646	+	22001655	22001660	22001655	TSS	same
chr1	22006880	22006999	ZH38T0000647	-	22006947	22006948	22006947	Exon	opposite
chr1	22009790	22009841	ZH38T0000648	-	22009811	22009823	22009811	Exon	opposite
chr1	22025469	22025546	ZH38T0000649	+	22025492	22025511	22025492	TSS	same
chr1	22052593	22052751	ZH38T0000650	+	22052688	22052728	22052716	TSS	same
chr1	22086721	22086802	ZH38T0000651	+	22086755	22086792	22086755	Exon	same
chr1	22342135	22342464	ZH38T0000652	+	22342151	22342406	22342315	Intergenic	opposite
chr1	22350410	22350477	ZH38T0000653	-	22350423	22350462	22350460	Intergenic	same
chr1	22418904	22419001	ZH38T0000654	-	22418930	22418964	22418963	Intergenic	opposite
chr1	22451818	22451894	ZH38T0000655	+	22451853	22451858	22451857	TSS	same
chr1	22510059	22510171	ZH38T0000656	+	22510094	22510152	22510151	Intron	same
chr1	22636422	22636869	ZH38T0000657	+	22636627	22636682	22636673	TSS	same
chr1	22637601	22637715	ZH38T0000658	+	22637618	22637674	22637673	Proximal	same
chr1	22638942	22638976	ZH38T0000659	-	22638958	22638959	22638958	Exon	opposite
chr1	22643561	22643828	ZH38T0000660	+	22643608	22643645	22643632	TSS	same
chr1	22644086	22644194	ZH38T0000661	+	22644102	22644158	22644112	Proximal	same
chr1	22653029	22653308	ZH38T0000662	+	22653166	22653266	22653262	TSS	same
chr1	22659503	22659639	ZH38T0000663	+	22659543	22659611	22659603	Exon	same
chr1	22660935	22660965	ZH38T0000664	-	22660949	22660950	22660949	Exon	opposite
chr1	22660981	22661331	ZH38T0000665	+	22661068	22661267	22661205	Exon	same
chr1	22661007	22661037	ZH38T0000666	-	22661021	22661022	22661021	Exon	opposite
chr1	22661402	22661459	ZH38T0000667	-	22661418	22661446	22661443	Exon	opposite
chr1	23014068	23014204	ZH38T0000668	-	23014126	23014152	23014133	TSS	same
chr1	23019822	23019873	ZH38T0000669	+	23019857	23019858	23019857	Proximal	same
chr1	23167811	23167920	ZH38T0000670	-	23167864	23167900	23167880	Intron	same
chr1	23168765	23168893	ZH38T0000671	-	23168819	23168856	23168819	TSS	same
chr1	23178455	23178558	ZH38T0000672	-	23178479	23178541	23178522	Intergenic	same
chr1	23318502	23318605	ZH38T0000673	-	23318512	23318566	23318535	Exon	same
chr1	23318651	23318726	ZH38T0000674	-	23318670	23318698	23318670	Exon	same
chr1	23344209	23344437	ZH38T0000675	-	23344249	23344308	23344307	TSS	same
chr1	23367979	23368140	ZH38T0000676	-	23368042	23368110	23368075	Proximal	same
chr1	23368143	23368393	ZH38T0000677	-	23368217	23368340	23368236	TSS	same
chr1	23368938	23369024	ZH38T0000678	+	23368948	23368974	23368963	Proximal	same
chr1	23369184	23369257	ZH38T0000679	+	23369198	23369225	23369198	TSS	same
chr1	23369784	23369872	ZH38T0000680	-	23369794	23369833	23369824	TSS	same
chr1	23393876	23394037	ZH38T0000681	-	23393887	23394002	23393896	Exon	same
chr1	23403883	23403992	ZH38T0000682	-	23403898	23403945	23403898	Exon	same
chr1	23417892	23418025	ZH38T0000683	-	23417917	23417997	23417917	Exon	same
chr1	23424558	23424769	ZH38T0000684	-	23424670	23424726	23424707	TSS	same
chr1	23436635	23436691	ZH38T0000685	-	23436661	23436676	23436675	TSS	same
chr1	23484111	23484227	ZH38T0000686	-	23484183	23484211	23484198	TSS	same
chr1	23528750	23528826	ZH38T0000687	+	23528785	23528796	23528793	Intron	opposite
chr1	23530832	23530940	ZH38T0000688	-	23530843	23530889	23530888	Proximal	same
chr1	23531270	23531379	ZH38T0000689	-	23531303	23531365	23531324	Proximal	same
chr1	23531388	23531523	ZH38T0000690	+	23531429	23531495	23531441	Proximal	opposite
chr1	23555030	23555151	ZH38T0000691	+	23555061	23555115	23555114	Intergenic	opposite
chr1	23558926	23559036	ZH38T0000692	-	23558949	23559022	23559016	Exon	same
chr1	23559129	23559608	ZH38T0000693	-	23559498	23559501	23559498	TSS	same
chr1	23559613	23559704	ZH38T0000694	+	23559642	23559671	23559647	Proximal	opposite
chr1	23559629	23559686	ZH38T0000695	-	23559646	23559653	23559652	Proximal	same
chr1	23562148	23562270	ZH38T0000696	-	23562188	23562238	23562237	Intergenic	same
chr1	23562343	23562510	ZH38T0000697	-	23562368	23562442	23562426	Intergenic	same
chr1	23612139	23612360	ZH38T0000698	+	23612187	23612283	23612196	Intron	same
chr1	23627240	23627462	ZH38T0000699	+	23627330	23627422	23627373	Exon	same
chr1	23691640	23691716	ZH38T0000700	+	23691672	23691707	23691680	Proximal	same
chr1	23691739	23691841	ZH38T0000701	+	23691805	23691806	23691805	TSS	same
chr1	23692587	23692758	ZH38T0000702	+	23692610	23692710	23692675	Proximal	same
chr1	23693798	23693919	ZH38T0000703	+	23693812	23693904	23693844	Exon	same
chr1	23693820	23693853	ZH38T0000704	-	23693835	23693836	23693835	Exon	opposite
chr1	23743389	23743524	ZH38T0000705	+	23743453	23743491	23743469	TSS	same
chr1	23778268	23778345	ZH38T0000706	-	23778289	23778318	23778317	TSS	same
chr1	23791103	23791256	ZH38T0000707	+	23791162	23791199	23791177	TSS	same
chr1	23791896	23791997	ZH38T0000708	+	23791950	23791975	23791950	Intron	same
chr1	23793575	23793685	ZH38T0000709	+	23793596	23793662	23793633	TSS	same
chr1	23800708	23800825	ZH38T0000710	-	23800754	23800758	23800757	TSS	same
chr1	23825353	23825518	ZH38T0000711	-	23825432	23825443	23825437	TSS	same
chr1	23868210	23868370	ZH38T0000712	-	23868293	23868337	23868293	TSS	same
chr1	23913301	23913489	ZH38T0000713	-	23913361	23913415	23913365	TSS	same
chr1	23959148	23959398	ZH38T0000714	+	23959196	23959299	23959286	Intron	same
chr1	23959598	23959701	ZH38T0000715	-	23959642	23959683	23959642	Proximal	opposite
chr1	23959776	23959880	ZH38T0000716	+	23959827	23959828	23959827	TSS	same
chr1	23960042	23960152	ZH38T0000717	+	23960072	23960140	23960094	Proximal	same
chr1	23960925	23961132	ZH38T0000718	+	23960948	23961071	23960948	TSS	same
chr1	23974981	23975156	ZH38T0000719	-	23974998	23975089	23975072	Exon	same
chr1	23978745	23978827	ZH38T0000720	-	23978761	23978813	23978761	Exon	same
chr1	23979835	23979994	ZH38T0000721	-	23979851	23979929	23979901	Proximal	same
chr1	23980182	23980517	ZH38T0000722	-	23980306	23980359	23980326	TSS	same
chr1	24096072	24096130	ZH38T0000723	+	24096111	24096119	24096111	Intron	opposite
chr1	24099677	24099709	ZH38T0000724	+	24099692	24099693	24099692	Exon	opposite
chr1	24108384	24108524	ZH38T0000725	-	24108423	24108501	24108438	Intron	same
chr1	24108608	24108701	ZH38T0000726	-	24108650	24108674	24108650	Intron	same
chr1	24112054	24112247	ZH38T0000727	-	24112134	24112180	24112134	TSS	same
chr1	24143030	24143213	ZH38T0000728	-	24143079	24143140	24143121	TSS	same
chr1	24151257	24151316	ZH38T0000729	-	24151268	24151280	24151279	Intergenic	same
chr1	24151424	24151588	ZH38T0000730	+	24151492	24151543	24151542	Intergenic	opposite
chr1	24187197	24187318	ZH38T0000731	-	24187245	24187292	24187280	TSS	same
chr1	24190987	24191076	ZH38T0000732	-	24191011	24191063	24191032	Intergenic	same
chr1	24254838	24254945	ZH38T0000733	-	24254852	24254906	24254882	Intergenic	opposite
chr1	24319286	24319573	ZH38T0000734	+	24319352	24319475	24319474	TSS	same
chr1	24321908	24322042	ZH38T0000735	+	24321938	24322006	24321996	Proximal	opposite
chr1	24413635	24413818	ZH38T0000736	-	24413698	24413740	24413698	TSS	same
chr1	24415757	24415836	ZH38T0000737	+	24415792	24415807	24415801	TSS	same
chr1	24428119	24428199	ZH38T0000738	+	24428158	24428172	24428161	Intron	same
chr1	24435928	24436020	ZH38T0000739	-	24435941	24436005	24436004	Intron	opposite
chr1	24490667	24490699	ZH38T0000740	+	24490682	24490683	24490682	Intergenic	same
chr1	24502259	24502469	ZH38T0000741	+	24502317	24502391	24502382	TSS	same
chr1	24502508	24502592	ZH38T0000742	+	24502521	24502568	24502521	Proximal	same
chr1	24503008	24503139	ZH38T0000743	+	24503033	24503057	24503037	Proximal	same
chr1	24515848	24515878	ZH38T0000744	+	24515862	24515863	24515862	Intron	same
chr1	24533071	24533260	ZH38T0000745	+	24533131	24533247	24533232	Exon	same
chr1	24535090	24535406	ZH38T0000746	+	24535103	24535387	24535262	TSS	opposite
chr1	24536484	24536694	ZH38T0000747	+	24536514	24536667	24536514	Exon	same
chr1	24555975	24556073	ZH38T0000748	-	24556032	24556049	24556033	TSS	same
chr1	24556061	24556169	ZH38T0000749	+	24556088	24556121	24556120	TSS	same
chr1	24589384	24589561	ZH38T0000750	+	24589439	24589498	24589449	Intron	same
chr1	24643175	24643355	ZH38T0000751	+	24643272	24643305	24643298	TSS	same
chr1	24643525	24643596	ZH38T0000752	+	24643562	24643581	24643578	Proximal	same
chr1	24648761	24648971	ZH38T0000753	+	24648781	24648907	24648841	Exon	same
chr1	24745289	24745571	ZH38T0000754	+	24745355	24745414	24745384	TSS	same
chr1	24826996	24827126	ZH38T0000755	+	24827045	24827112	24827111	Exon	same
chr1	24839850	24840052	ZH38T0000756	+	24839896	24840033	24839903	Exon	same
chr1	24840761	24841266	ZH38T0000757	+	24840788	24841065	24840996	Exon	same
chr1	24842709	24843035	ZH38T0000758	+	24842735	24843014	24843013	Exon	same
chr1	24964914	24965234	ZH38T0000759	-	24964994	24965166	24965137	TSS	same
chr1	25232364	25232616	ZH38T0000760	-	25232479	25232499	25232486	TSS	same
chr1	25232557	25232725	ZH38T0000761	+	25232581	25232657	25232656	TSS	same
chr1	25247037	25247124	ZH38T0000762	-	25247077	25247100	25247086	Proximal	same
chr1	25247322	25247535	ZH38T0000763	-	25247453	25247454	25247453	TSS	same
chr1	25267851	25267929	ZH38T0000764	-	25267862	25267917	25267862	Intergenic	same
chr1	25337793	25337871	ZH38T0000765	-	25337834	25337858	25337853	Proximal	same
chr1	25338154	25338267	ZH38T0000766	-	25338191	25338246	25338243	Proximal	opposite
chr1	25338264	25338496	ZH38T0000767	+	25338307	25338361	25338330	TSS	same
chr1	25430242	25430379	ZH38T0000768	+	25430277	25430340	25430336	Proximal	opposite
chr1	25430934	25431103	ZH38T0000769	+	25430999	25431057	25431031	Proximal	same
chr1	25543564	25543696	ZH38T0000770	+	25543600	25543656	25543602	TSS	same
chr1	25549843	25549991	ZH38T0000771	+	25549862	25549918	25549882	Intron	same
chr1	25562776	25562834	ZH38T0000772	+	25562793	25562807	25562793	Intron	same
chr1	25819804	25819947	ZH38T0000773	-	25819834	25819931	25819930	TSS	opposite
chr1	25819902	25820038	ZH38T0000774	+	25819952	25820005	25819952	TSS	same
chr1	25820829	25820879	ZH38T0000775	+	25820840	25820866	25820864	Proximal	same
chr1	25829289	25829375	ZH38T0000776	+	25829307	25829343	25829339	Intron	same
chr1	25859332	25859475	ZH38T0000777	-	25859388	25859449	25859409	TSS	same
chr1	25859514	25859639	ZH38T0000778	+	25859532	25859578	25859577	TSS	same
chr1	25875472	25875633	ZH38T0000779	-	25875515	25875523	25875515	Intergenic	opposite
chr1	25905045	25905174	ZH38T0000780	-	25905075	25905146	25905125	TSS	same
chr1	25905417	25905533	ZH38T0000781	-	25905467	25905511	25905478	Proximal	same
chr1	25905871	25906088	ZH38T0000782	-	25905903	25906038	25906000	Proximal	same
chr1	25906380	25906515	ZH38T0000783	-	25906418	25906419	25906418	TSS	same
chr1	25906811	25907028	ZH38T0000784	-	25906845	25906913	25906867	TSS	same
chr1	25989531	25989674	ZH38T0000785	-	25989565	25989608	25989565	Intron	same
chr1	25998036	25998103	ZH38T0000786	-	25998054	25998089	25998054	TSS	same
chr1	25998115	25998185	ZH38T0000787	-	25998129	25998170	25998129	Proximal	same
chr1	26021746	26021799	ZH38T0000788	+	26021769	26021779	26021778	TSS	same
chr1	26035325	26035456	ZH38T0000789	-	26035392	26035426	26035401	Exon	opposite
chr1	26036408	26036455	ZH38T0000790	-	26036432	26036437	26036436	Exon	opposite
chr1	26036540	26036664	ZH38T0000791	-	26036554	26036652	26036628	Intergenic	same
chr1	26051832	26051867	ZH38T0000792	+	26051848	26051850	26051848	Exon	opposite
chr1	26066935	26067069	ZH38T0000793	-	26066970	26067026	26067020	Intron	same
chr1	26067594	26067660	ZH38T0000794	-	26067632	26067634	26067632	TSS	same
chr1	26111104	26111238	ZH38T0000795	+	26111153	26111211	26111189	TSS	same
chr1	26111752	26111896	ZH38T0000796	+	26111803	26111843	26111827	TSS	same
chr1	26159006	26159098	ZH38T0000797	+	26159037	26159079	26159078	TSS	same
chr1	26169844	26170004	ZH38T0000798	+	26169898	26169942	26169926	TSS	same
chr1	26177445	26177545	ZH38T0000799	+	26177475	26177507	26177506	TSS	same
chr1	26182004	26182079	ZH38T0000800	+	26182029	26182061	26182029	Intron	same
chr1	26190533	26190637	ZH38T0000801	+	26190585	26190604	26190601	TSS	same
chr1	26225502	26225618	ZH38T0000802	+	26225528	26225596	26225595	Proximal	same
chr1	26234135	26234261	ZH38T0000803	+	26234195	26234223	26234216	TSS	same
chr1	26254557	26254715	ZH38T0000804	+	26254574	26254620	26254594	Intron	same
chr1	26257464	26257559	ZH38T0000805	+	26257497	26257537	26257497	Intron	same
chr1	26279987	26280213	ZH38T0000806	+	26280064	26280108	26280095	TSS	same
chr1	26290957	26291147	ZH38T0000807	+	26290971	26291111	26290971	Intron	opposite
chr1	26306538	26306775	ZH38T0000808	-	26306621	26306648	26306635	TSS	same
chr1	26306993	26307105	ZH38T0000809	-	26307032	26307093	26307032	Proximal	same
chr1	26317874	26318067	ZH38T0000810	+	26317919	26317958	26317957	TSS	same
chr1	26354033	26354240	ZH38T0000811	-	26354098	26354130	26354129	TSS	same
chr1	26354265	26354410	ZH38T0000812	-	26354356	26354396	26354361	Proximal	same
chr1	26372684	26372810	ZH38T0000813	-	26372735	26372770	26372747	TSS	same
chr1	26374448	26374578	ZH38T0000814	-	26374497	26374540	26374505	Intergenic	same
chr1	26410709	26410935	ZH38T0000815	+	26410777	26410828	26410827	TSS	same
chr1	26432058	26432173	ZH38T0000816	-	26432074	26432126	26432100	Proximal	opposite
chr1	26432288	26432429	ZH38T0000817	+	26432364	26432403	26432364	TSS	same
chr1	26470813	26470897	ZH38T0000818	+	26470865	26470869	26470868	Exon	same
chr1	26472198	26472321	ZH38T0000819	-	26472245	26472306	26472305	Proximal	opposite
chr1	26472375	26472638	ZH38T0000820	+	26472505	26472515	26472505	TSS	same
chr1	26473149	26473333	ZH38T0000821	+	26473211	26473241	26473233	Intron	same
chr1	26538286	26538398	ZH38T0000822	+	26538321	26538376	26538326	Intron	same
chr1	26543083	26543219	ZH38T0000823	+	26543111	26543130	26543111	TSS	same
chr1	26545799	26545926	ZH38T0000824	+	26545823	26545856	26545855	TSS	same
chr1	26621048	26621121	ZH38T0000825	+	26621060	26621082	26621081	Intergenic	opposite
chr1	26692554	26692646	ZH38T0000826	+	26692565	26692617	26692596	Exon	opposite
chr1	26695992	26696049	ZH38T0000827	+	26696014	26696026	26696025	TSS	same
chr1	26771190	26771243	ZH38T0000828	+	26771208	26771230	26771229	Exon	same
chr1	26779314	26779472	ZH38T0000829	+	26779325	26779461	26779385	Exon	same
chr1	26787925	26788025	ZH38T0000830	+	26787949	26787967	26787966	TSS	same
chr1	26788163	26788214	ZH38T0000831	+	26788184	26788195	26788187	TSS	same
chr1	26831962	26832096	ZH38T0000832	+	26831997	26832053	26832019	Intron	same
chr1	26862990	26863051	ZH38T0000833	+	26863028	26863035	26863028	Proximal	same
chr1	26863081	26863279	ZH38T0000834	+	26863145	26863151	26863148	TSS	same
chr1	26863698	26863728	ZH38T0000835	-	26863712	26863713	26863712	Exon	opposite
chr1	26863741	26863788	ZH38T0000836	-	26863771	26863772	26863771	Exon	opposite
chr1	26863821	26863880	ZH38T0000837	-	26863863	26863864	26863863	Exon	opposite
chr1	26864429	26864461	ZH38T0000838	-	26864444	26864446	26864444	Exon	opposite
chr1	26865005	26865140	ZH38T0000839	-	26865055	26865091	26865061	Intergenic	opposite
chr1	26890137	26890340	ZH38T0000840	-	26890230	26890299	26890282	TSS	same
chr1	26900173	26900218	ZH38T0000841	+	26900183	26900201	26900197	Proximal	opposite
chr1	26900408	26900485	ZH38T0000842	-	26900452	26900467	26900452	TSS	same
chr1	26900452	26900619	ZH38T0000843	+	26900510	26900608	26900546	TSS	opposite
chr1	26913955	26913994	ZH38T0000844	-	26913971	26913977	26913971	TSS	same
chr1	26921621	26921935	ZH38T0000845	+	26921723	26921760	26921755	TSS	same
chr1	26944357	26944452	ZH38T0000846	+	26944406	26944417	26944411	Intron	same
chr1	26945363	26945496	ZH38T0000847	+	26945379	26945435	26945385	Exon	same
chr1	26960345	26960510	ZH38T0000848	-	26960378	26960456	26960378	TSS	same
chr1	27012831	27012865	ZH38T0000849	-	27012848	27012850	27012848	TSS	same
chr1	27234379	27234601	ZH38T0000850	+	27234416	27234543	27234519	Proximal	same
chr1	27234604	27234710	ZH38T0000851	+	27234619	27234688	27234631	TSS	same
chr1	27234830	27234942	ZH38T0000852	+	27234851	27234894	27234872	Proximal	same
chr1	27322204	27322336	ZH38T0000853	+	27322232	27322288	27322244	TSS	same
chr1	27341977	27342122	ZH38T0000854	+	27342017	27342045	27342017	TSS	same
chr1	27351324	27351437	ZH38T0000855	+	27351381	27351421	27351381	Intron	same
chr1	27366911	27367011	ZH38T0000856	-	27366922	27366972	27366958	TSS	same
chr1	27374721	27374878	ZH38T0000857	-	27374823	27374830	27374823	TSS	same
chr1	27383285	27383362	ZH38T0000858	-	27383294	27383319	27383314	TSS	same
chr1	27404541	27404821	ZH38T0000859	-	27404553	27404778	27404616	Exon	same
chr1	27418256	27418336	ZH38T0000860	-	27418269	27418319	27418278	Exon	same
chr1	27428756	27428938	ZH38T0000861	-	27428785	27428920	27428785	Exon	same
chr1	27490028	27490227	ZH38T0000862	-	27490160	27490170	27490166	TSS	same
chr1	27508351	27508516	ZH38T0000863	-	27508401	27508496	27508401	Intergenic	opposite
chr1	27564283	27564355	ZH38T0000864	+	27564303	27564339	27564319	Intron	opposite
chr1	27604070	27604239	ZH38T0000865	-	27604131	27604185	27604143	TSS	same
chr1	27626177	27626296	ZH38T0000866	-	27626235	27626254	27626235	TSS	same
chr1	27626475	27626612	ZH38T0000867	-	27626525	27626594	27626556	Proximal	same
chr1	27635077	27635319	ZH38T0000868	-	27635136	27635213	27635185	TSS	same
chr1	27635517	27635597	ZH38T0000869	-	27635549	27635564	27635549	Proximal	same
chr1	27672112	27672274	ZH38T0000870	-	27672187	27672192	27672191	TSS	same
chr1	27725681	27725831	ZH38T0000871	-	27725691	27725783	27725759	TSS	same
chr1	27725948	27726007	ZH38T0000872	+	27725970	27725982	27725974	TSS	same
chr1	27773119	27773363	ZH38T0000873	+	27773206	27773252	27773218	TSS	same
chr1	27830751	27830843	ZH38T0000874	+	27830803	27830822	27830813	TSS	same
chr1	27872471	27872605	ZH38T0000875	+	27872543	27872555	27872543	TSS	same
chr1	27914497	27914782	ZH38T0000876	-	27914548	27914600	27914548	TSS	same
chr1	27934952	27935120	ZH38T0000877	+	27934984	27935042	27935028	TSS	same
chr1	28088512	28088734	ZH38T0000878	-	28088572	28088685	28088630	TSS	same
chr1	28096415	28096460	ZH38T0000879	-	28096431	28096447	28096443	TSS	same
chr1	28176607	28176706	ZH38T0000880	-	28176635	28176690	28176635	TSS	same
chr1	28177106	28177371	ZH38T0000881	-	28177187	28177334	28177251	Intron	same
chr1	28193707	28193750	ZH38T0000882	-	28193722	28193723	28193722	Proximal	same
chr1	28193797	28193932	ZH38T0000883	-	28193833	28193863	28193855	TSS	same
chr1	28232927	28233079	ZH38T0000884	-	28233003	28233026	28233003	TSS	same
chr1	28236058	28236280	ZH38T0000885	+	28236123	28236163	28236150	TSS	same
chr1	28236398	28236488	ZH38T0000886	-	28236431	28236477	28236453	Proximal	opposite
chr1	28236997	28237089	ZH38T0000887	-	28237025	28237067	28237029	Exon	opposite
chr1	28247162	28247328	ZH38T0000888	-	28247185	28247240	28247213	Proximal	opposite
chr1	28249610	28249696	ZH38T0000889	+	28249624	28249680	28249658	Intergenic	same
chr1	28259461	28259547	ZH38T0000890	+	28259479	28259521	28259520	TSS	same
chr1	28328994	28329120	ZH38T0000891	+	28329016	28329073	28329061	TSS	same
chr1	28369545	28369626	ZH38T0000892	+	28369553	28369603	28369573	Proximal	same
chr1	28369640	28369815	ZH38T0000893	+	28369715	28369768	28369740	TSS	same
chr1	28438085	28438232	ZH38T0000894	+	28438130	28438170	28438146	TSS	same
chr1	28459067	28459146	ZH38T0000895	+	28459091	28459132	28459118	Exon	same
chr1	28473943	28474112	ZH38T0000896	+	28473953	28474102	28474029	Exon	same
chr1	28505784	28505940	ZH38T0000897	-	28505816	28505897	28505862	Proximal	opposite
chr1	28505941	28506019	ZH38T0000898	+	28505977	28505990	28505979	TSS	same
chr1	28506021	28506086	ZH38T0000899	+	28506042	28506045	28506042	TSS	same
chr1	28507344	28507403	ZH38T0000900	+	28507363	28507364	28507363	TSS	same
chr1	28508543	28508640	ZH38T0000901	+	28508556	28508583	28508582	TSS	same
chr1	28509988	28510105	ZH38T0000902	+	28510066	28510085	28510078	Exon	same
chr1	28518185	28518326	ZH38T0000903	+	28518228	28518290	28518249	TSS	same
chr1	28552995	28553133	ZH38T0000904	+	28553080	28553105	28553094	TSS	same
chr1	28581845	28581892	ZH38T0000905	-	28581870	28581873	28581871	TSS	same
chr1	28582009	28582096	ZH38T0000906	+	28582022	28582069	28582026	Proximal	opposite
chr1	28642936	28643125	ZH38T0000907	-	28643025	28643084	28643075	TSS	same
chr1	28643147	28643286	ZH38T0000908	+	28643180	28643245	28643236	TSS	same
chr1	28648230	28648349	ZH38T0000909	-	28648248	28648335	28648248	Proximal	opposite
chr1	28648582	28648624	ZH38T0000910	+	28648604	28648605	28648604	TSS	same
chr1	28668736	28668842	ZH38T0000911	+	28668767	28668815	28668793	TSS	same
chr1	28736646	28736728	ZH38T0000912	-	28736660	28736700	28736699	Proximal	opposite
chr1	28736786	28736838	ZH38T0000913	+	28736807	28736829	28736807	Proximal	same
chr1	28736840	28737111	ZH38T0000914	+	28736934	28736992	28736950	TSS	same
chr1	28737645	28737756	ZH38T0000915	-	28737669	28737722	28737717	Intron	opposite
chr1	28737720	28737808	ZH38T0000916	+	28737731	28737762	28737749	Intron	same
chr1	28887047	28887215	ZH38T0000917	+	28887099	28887124	28887120	TSS	same
chr1	28889457	28889527	ZH38T0000918	+	28889495	28889516	28889495	Intron	same
chr1	28914518	28914762	ZH38T0000919	+	28914561	28914642	28914568	TSS	same
chr1	28987502	28987655	ZH38T0000920	+	28987514	28987615	28987614	Exon	same
chr1	29053147	29053184	ZH38T0000921	+	29053163	29053164	29053163	Exon	same
chr1	29130668	29130702	ZH38T0000922	-	29130683	29130684	29130683	Intergenic	same
chr1	29148930	29149160	ZH38T0000923	-	29148943	29149114	29149056	Exon	same
chr1	29154685	29154915	ZH38T0000924	-	29154697	29154825	29154824	Exon	same
chr1	29181743	29181873	ZH38T0000925	-	29181820	29181851	29181846	Proximal	same
chr1	29230791	29230984	ZH38T0000926	-	29230923	29230958	29230923	TSS	same
chr1	29260125	29260200	ZH38T0000927	+	29260148	29260171	29260170	Intron	same
chr1	30230118	30230271	ZH38T0000928	+	30230176	30230242	30230198	Intergenic	same
chr1	30523432	30523497	ZH38T0000929	+	30523452	30523473	30523466	Intergenic	same
chr1	30718703	30718829	ZH38T0000930	+	30718735	30718808	30718801	Proximal	same
chr1	30732818	30732938	ZH38T0000931	+	30732833	30732883	30732833	Exon	same
chr1	30749965	30750072	ZH38T0000932	+	30750011	30750027	30750011	Intron	opposite
chr1	30756555	30756764	ZH38T0000933	-	30756624	30756742	30756702	Intron	same
chr1	30757653	30757913	ZH38T0000934	-	30757773	30757848	30757832	TSS	same
chr1	30824206	30824286	ZH38T0000935	+	30824227	30824266	30824227	TSS	same
chr1	30879980	30880195	ZH38T0000936	-	30880065	30880146	30880119	Intron	same
chr1	30880642	30880812	ZH38T0000937	-	30880727	30880797	30880727	Intron	same
chr1	30949122	30949234	ZH38T0000938	-	30949136	30949222	30949136	Intron	same
chr1	31065623	31065758	ZH38T0000939	-	31065689	31065717	31065697	TSS	same
chr1	31065792	31065953	ZH38T0000940	-	31065849	31065934	31065927	Proximal	same
chr1	31154908	31154987	ZH38T0000941	-	31154923	31154960	31154944	Intergenic	same
chr1	31180226	31180282	ZH38T0000942	-	31180243	31180244	31180243	Exon	same
chr1	31296712	31296836	ZH38T0000943	-	31296756	31296788	31296764	TSS	same
chr1	31296924	31297160	ZH38T0000944	+	31296997	31297049	31297040	TSS	same
chr1	31346800	31346952	ZH38T0000945	-	31346853	31346925	31346883	Proximal	same
chr1	31372912	31373239	ZH38T0000946	-	31373072	31373076	31373075	TSS	same
chr1	31373245	31373406	ZH38T0000947	-	31373291	31373393	31373297	Proximal	same
chr1	31376340	31376374	ZH38T0000948	-	31376356	31376357	31376356	Intergenic	same
chr1	31384143	31384211	ZH38T0000949	-	31384160	31384176	31384160	Intergenic	same
chr1	31413191	31413285	ZH38T0000950	+	31413228	31413239	31413232	TSS	same
chr1	31413954	31414344	ZH38T0000951	-	31414097	31414215	31414170	Proximal	opposite
chr1	31434261	31434297	ZH38T0000952	-	31434273	31434280	31434279	Exon	opposite
chr1	31448412	31448515	ZH38T0000953	+	31448438	31448500	31448438	Intergenic	same
chr1	31575568	31575669	ZH38T0000954	-	31575600	31575625	31575600	TSS	same
chr1	31576315	31576476	ZH38T0000955	+	31576358	31576453	31576400	Proximal	same
chr1	31576480	31576606	ZH38T0000956	+	31576514	31576544	31576514	TSS	same
chr1	31576920	31577123	ZH38T0000957	+	31576948	31577018	31576994	Intron	same
chr1	31579374	31579602	ZH38T0000958	-	31579402	31579509	31579508	Intron	opposite
chr1	31584305	31584359	ZH38T0000959	+	31584316	31584341	31584332	Intron	same
chr1	31644808	31644921	ZH38T0000960	-	31644872	31644885	31644872	TSS	same
chr1	31669928	31670103	ZH38T0000961	+	31669950	31670071	31670067	Intron	opposite
chr1	31669995	31670121	ZH38T0000962	-	31670008	31670096	31670095	Intron	same
chr1	31675330	31675472	ZH38T0000963	-	31675370	31675412	31675404	Intron	same
chr1	31689450	31689604	ZH38T0000964	-	31689489	31689566	31689511	Intron	same
chr1	31692778	31692815	ZH38T0000965	-	31692795	31692802	31692795	Exon	same
chr1	31696258	31696348	ZH38T0000966	-	31696271	31696321	31696316	Intron	same
chr1	31701537	31701611	ZH38T0000967	-	31701585	31701598	31701585	Intron	same
chr1	31703826	31704220	ZH38T0000968	-	31703988	31704033	31703995	TSS	same
chr1	31744661	31744711	ZH38T0000969	-	31744678	31744681	31744678	Exon	same
chr1	31745175	31745293	ZH38T0000970	-	31745189	31745260	31745189	Intron	same
chr1	31798530	31798817	ZH38T0000971	-	31798621	31798716	31798713	Proximal	same
chr1	31815952	31816062	ZH38T0000972	-	31815984	31816031	31815984	TSS	same
chr1	31915890	31915996	ZH38T0000973	-	31915933	31915979	31915978	Exon	same
chr1	31937727	31937866	ZH38T0000974	-	31937774	31937810	31937774	TSS	same
chr1	31938332	31938383	ZH38T0000975	-	31938350	31938356	31938353	TSS	same
chr1	31944340	31944411	ZH38T0000976	-	31944355	31944400	31944373	Intergenic	same
chr1	32013659	32013942	ZH38T0000977	+	32013848	32013870	32013869	TSS	same
chr1	32014177	32014306	ZH38T0000978	+	32014228	32014277	32014273	Proximal	same
chr1	32014330	32014382	ZH38T0000979	+	32014351	32014352	32014351	Proximal	same
chr1	32072699	32072888	ZH38T0000980	-	32072718	32072829	32072800	Proximal	opposite
chr1	32072886	32073046	ZH38T0000981	+	32072911	32072981	32072980	TSS	same
chr1	32108008	32108129	ZH38T0000982	+	32108039	32108090	32108086	TSS	same
chr1	32108428	32108562	ZH38T0000983	+	32108454	32108539	32108493	Proximal	same
chr1	32108575	32108647	ZH38T0000984	+	32108584	32108634	32108633	Intron	same
chr1	32142876	32143006	ZH38T0000985	+	32142902	32142957	32142950	Intron	same
chr1	32174067	32174272	ZH38T0000986	+	32174087	32174249	32174159	Exon	same
chr1	32179639	32179779	ZH38T0000987	+	32179722	32179758	32179742	TSS	same
chr1	32180006	32180169	ZH38T0000988	+	32180032	32180115	32180105	TSS	same
chr1	32200453	32200752	ZH38T0000989	-	32200486	32200731	32200730	TSS	opposite
chr1	32200568	32200715	ZH38T0000990	+	32200620	32200657	32200652	TSS	same
chr1	32201612	32201771	ZH38T0000991	+	32201672	32201729	32201681	Intron	same
chr1	32205612	32205715	ZH38T0000992	+	32205647	32205668	32205647	TSS	same
chr1	32209054	32209124	ZH38T0000993	+	32209078	32209096	32209088	TSS	same
chr1	32221708	32221848	ZH38T0000994	+	32221748	32221836	32221802	Intron	opposite
chr1	32222266	32222381	ZH38T0000995	-	32222324	32222353	32222346	TSS	same
chr1	32222348	32222495	ZH38T0000996	+	32222406	32222433	32222406	TSS	same
chr1	32240161	32240285	ZH38T0000997	-	32240176	32240256	32240201	Exon	same
chr1	32240465	32240548	ZH38T0000998	+	32240487	32240522	32240517	Proximal	opposite
chr1	32241629	32241695	ZH38T0000999	-	32241642	32241674	32241642	Proximal	same
chr1	32247189	32247347	ZH38T0001000	+	32247221	32247301	32247233	TSS	same
chr1	32251190	32251360	ZH38T0001001	+	32251261	32251299	32251261	TSS	same
chr1	32251435	32251600	ZH38T0001002	+	32251482	32251539	32251503	Proximal	same
chr1	32274061	32274171	ZH38T0001003	+	32274102	32274143	32274120	TSS	same
chr1	32291807	32291876	ZH38T0001004	-	32291822	32291846	32291825	Proximal	opposite
chr1	32291901	32291994	ZH38T0001005	-	32291939	32291975	32291953	Proximal	opposite
chr1	32291912	32291990	ZH38T0001006	+	32291945	32291976	32291945	Proximal	same
chr1	32292054	32292177	ZH38T0001007	+	32292082	32292144	32292139	TSS	same
chr1	32292237	32292310	ZH38T0001008	+	32292250	32292287	32292273	Proximal	same
chr1	32331656	32331771	ZH38T0001009	+	32331667	32331758	32331757	Exon	same
chr1	32336216	32336254	ZH38T0001010	-	32336235	32336237	32336236	TSS	same
chr1	32351565	32351653	ZH38T0001011	+	32351598	32351639	32351611	Intergenic	opposite
chr1	32362150	32362350	ZH38T0001012	+	32362165	32362337	32362174	TSS	opposite
chr1	32362512	32362624	ZH38T0001013	+	32362540	32362557	32362540	TSS	same
chr1	32394377	32394505	ZH38T0001014	-	32394420	32394434	32394433	TSS	same
chr1	32465009	32465109	ZH38T0001015	+	32465038	32465083	32465068	TSS	same
chr1	32539116	32539222	ZH38T0001016	+	32539139	32539188	32539141	Proximal	same
chr1	32539399	32539482	ZH38T0001017	+	32539410	32539455	32539433	TSS	same
chr1	32612104	32612315	ZH38T0001018	-	32612151	32612280	32612236	Intron	same
chr1	32637265	32637362	ZH38T0001019	-	32637293	32637338	32637312	Intron	same
chr1	32650464	32650620	ZH38T0001020	-	32650534	32650560	32650534	TSS	same
chr1	32650853	32651066	ZH38T0001021	-	32650934	32650981	32650935	Proximal	same
chr1	32651130	32651331	ZH38T0001022	+	32651190	32651300	32651198	TSS	same
chr1	32694855	32695611	ZH38T0001023	-	32694866	32695353	32695102	Exon	same
chr1	32702610	32702689	ZH38T0001024	-	32702663	32702668	32702667	Proximal	same
chr1	32703028	32703223	ZH38T0001025	-	32703099	32703207	32703196	TSS	same
chr1	32703558	32703610	ZH38T0001026	-	32703587	32703592	32703591	Proximal	same
chr1	32725159	32725366	ZH38T0001027	-	32725196	32725298	32725228	TSS	same
chr1	32753981	32754052	ZH38T0001028	+	32753998	32754020	32753998	TSS	same
chr1	32765561	32765777	ZH38T0001029	+	32765626	32765680	32765633	TSS	same
chr1	32817156	32817502	ZH38T0001030	-	32817319	32817380	32817329	TSS	same
chr1	32817470	32817854	ZH38T0001031	+	32817554	32817674	32817649	TSS	same
chr1	32818029	32818079	ZH38T0001032	-	32818038	32818063	32818062	Proximal	same
chr1	32872427	32872565	ZH38T0001033	-	32872484	32872542	32872503	TSS	same
chr1	32885859	32886106	ZH38T0001034	+	32885888	32885999	32885977	Intergenic	same
chr1	32886407	32886524	ZH38T0001035	+	32886438	32886494	32886490	TSS	same
chr1	32893029	32893127	ZH38T0001036	+	32893043	32893086	32893085	Intron	same
chr1	32894741	32895026	ZH38T0001037	-	32894780	32895011	32894780	Intron	same
chr1	32901255	32901380	ZH38T0001038	-	32901318	32901342	32901341	Proximal	same
chr1	33021438	33021472	ZH38T0001039	-	33021454	33021455	33021454	Exon	same
chr1	33021963	33022064	ZH38T0001040	-	33021986	33022039	33022012	Intron	same
chr1	33036730	33037060	ZH38T0001041	-	33036844	33036891	33036844	TSS	same
chr1	33045455	33045520	ZH38T0001042	+	33045493	33045509	33045493	Intergenic	opposite
chr1	33081099	33081200	ZH38T0001043	+	33081150	33081152	33081150	TSS	same
chr1	33127223	33127317	ZH38T0001044	-	33127238	33127269	33127252	Intergenic	same
chr1	33127502	33127634	ZH38T0001045	+	33127521	33127603	33127602	Intergenic	opposite
chr1	33182021	33182112	ZH38T0001046	-	33182042	33182083	33182042	TSS	same
chr1	33238543	33238646	ZH38T0001047	+	33238551	33238609	33238586	Intergenic	same
chr1	33334109	33334148	ZH38T0001048	-	33334130	33334135	33334130	Exon	same
chr1	33334323	33334400	ZH38T0001049	-	33334349	33334382	33334359	Intron	same
chr1	33347146	33347269	ZH38T0001050	+	33347218	33347252	33347237	Intron	opposite
chr1	33349979	33350094	ZH38T0001051	+	33350019	33350078	33350065	Proximal	same
chr1	33365085	33365117	ZH38T0001052	-	33365100	33365101	33365100	Intron	same
chr1	33392647	33392827	ZH38T0001053	-	33392738	33392785	33392778	Intergenic	same
chr1	33430986	33431106	ZH38T0001054	-	33431005	33431058	33431005	Intergenic	opposite
chr1	33472615	33472675	ZH38T0001055	+	33472640	33472651	33472650	TSS	same
chr1	33864000	33864251	ZH38T0001056	+	33864078	33864079	33864078	Exon	same
chr1	33870134	33870291	ZH38T0001057	+	33870181	33870235	33870196	TSS	same
chr1	34166968	34167046	ZH38T0001058	+	34166989	34167033	34167013	Proximal	same
chr1	34517074	34517182	ZH38T0001059	-	34517088	34517119	34517088	Intergenic	same
chr1	34570443	34570475	ZH38T0001060	-	34570458	34570459	34570458	Intergenic	same
chr1	34685252	34685447	ZH38T0001061	-	34685295	34685409	34685308	Proximal	same
chr1	34755000	34755177	ZH38T0001062	+	34755046	34755110	34755065	TSS	same
chr1	34759719	34759809	ZH38T0001063	+	34759737	34759745	34759737	TSS	same
chr1	34781143	34781255	ZH38T0001064	+	34781179	34781214	34781213	TSS	same
chr1	34782234	34782357	ZH38T0001065	+	34782264	34782323	34782290	TSS	same
chr1	34792978	34793017	ZH38T0001066	+	34792993	34792999	34792993	TSS	same
chr1	34858972	34859114	ZH38T0001067	-	34859024	34859083	34859044	TSS	same
chr1	34859671	34859834	ZH38T0001068	-	34859721	34859788	34859752	TSS	same
chr1	34985268	34985366	ZH38T0001069	-	34985317	34985330	34985324	TSS	same
chr1	35031644	35031754	ZH38T0001070	-	35031689	35031717	35031689	TSS	same
chr1	35031881	35032007	ZH38T0001071	-	35031918	35031966	35031944	TSS	same
chr1	35079342	35079450	ZH38T0001072	+	35079376	35079422	35079379	TSS	same
chr1	35177976	35178159	ZH38T0001073	-	35177990	35178111	35178027	Intergenic	same
chr1	35190139	35190260	ZH38T0001074	-	35190164	35190214	35190183	Intron	same
chr1	35190686	35190920	ZH38T0001075	-	35190712	35190890	35190800	Exon	same
chr1	35191972	35192104	ZH38T0001076	-	35192046	35192090	35192077	Intron	same
chr1	35192567	35192631	ZH38T0001077	+	35192588	35192592	35192591	Exon	opposite
chr1	35192678	35192747	ZH38T0001078	+	35192692	35192723	35192722	Proximal	opposite
chr1	35192926	35193214	ZH38T0001079	-	35193144	35193145	35193144	TSS	same
chr1	35268919	35269066	ZH38T0001080	+	35268935	35269014	35268966	TSS	same
chr1	35447396	35447460	ZH38T0001081	-	35447433	35447446	35447442	Intron	same
chr1	35557344	35557445	ZH38T0001082	-	35557383	35557424	35557386	TSS	same
chr1	35557585	35557692	ZH38T0001083	-	35557598	35557644	35557643	Proximal	same
chr1	35557745	35557948	ZH38T0001084	+	35557789	35557830	35557819	TSS	same
chr1	35577724	35577820	ZH38T0001085	-	35577759	35577800	35577776	TSS	same
chr1	35605247	35605627	ZH38T0001086	-	35605302	35605572	35605443	Intron	same
chr1	35641358	35641594	ZH38T0001087	-	35641487	35641543	35641511	TSS	same
chr1	35718714	35718923	ZH38T0001088	-	35718794	35718894	35718821	TSS	same
chr1	35760335	35760622	ZH38T0001089	-	35760434	35760593	35760590	Exon	same
chr1	35769877	35770049	ZH38T0001090	-	35769963	35769994	35769966	TSS	same
chr1	35807604	35807694	ZH38T0001091	+	35807635	35807674	35807647	Proximal	same
chr1	35807878	35808021	ZH38T0001092	-	35807923	35807994	35807927	TSS	opposite
chr1	35869709	35869879	ZH38T0001093	+	35869733	35869803	35869756	TSS	same
chr1	35883217	35883279	ZH38T0001094	+	35883232	35883263	35883232	Proximal	same
chr1	35930678	35930788	ZH38T0001095	+	35930717	35930764	35930749	TSS	same
chr1	35931065	35931189	ZH38T0001096	+	35931078	35931130	35931109	TSS	same
chr1	35931192	35931284	ZH38T0001097	+	35931211	35931268	35931250	TSS	same
chr1	35931290	35931379	ZH38T0001098	+	35931304	35931326	35931315	Proximal	same
chr1	36084051	36084178	ZH38T0001099	+	36084090	36084128	36084127	TSS	same
chr1	36084315	36084453	ZH38T0001100	+	36084359	36084403	36084359	Proximal	same
chr1	36088859	36088926	ZH38T0001101	+	36088872	36088897	36088884	TSS	same
chr1	36149229	36149315	ZH38T0001102	-	36149259	36149294	36149261	Proximal	same
chr1	36149359	36149544	ZH38T0001103	-	36149469	36149499	36149485	TSS	same
chr1	36155525	36155594	ZH38T0001104	+	36155532	36155560	36155557	Proximal	same
chr1	36155814	36155899	ZH38T0001105	-	36155855	36155869	36155859	Proximal	same
chr1	36178084	36178219	ZH38T0001106	+	36178135	36178200	36178199	Exon	same
chr1	36178410	36178607	ZH38T0001107	+	36178510	36178542	36178510	Exon	same
chr1	36179063	36179172	ZH38T0001108	+	36179084	36179142	36179141	Intron	same
chr1	36224381	36224510	ZH38T0001109	+	36224424	36224454	36224442	TSS	same
chr1	36287028	36287238	ZH38T0001110	+	36287037	36287196	36287090	Exon	same
chr1	36288790	36288904	ZH38T0001111	+	36288817	36288888	36288876	Intron	same
chr1	36289047	36289305	ZH38T0001112	+	36289087	36289256	36289255	Exon	same
chr1	36289308	36289481	ZH38T0001113	+	36289333	36289470	36289360	Exon	same
chr1	36296490	36296549	ZH38T0001114	+	36296518	36296535	36296520	Intron	same
chr1	36296557	36296748	ZH38T0001115	+	36296585	36296690	36296689	Exon	same
chr1	36300768	36300814	ZH38T0001116	+	36300781	36300785	36300781	Intron	same
chr1	36303785	36303910	ZH38T0001117	+	36303798	36303830	36303829	Exon	same
chr1	36306295	36306456	ZH38T0001118	+	36306361	36306402	36306361	Intergenic	same
chr1	36307044	36307167	ZH38T0001119	+	36307106	36307110	36307106	TSS	same
chr1	36386470	36386564	ZH38T0001120	-	36386499	36386547	36386499	Intergenic	same
chr1	36386682	36386724	ZH38T0001121	+	36386694	36386702	36386699	Intergenic	opposite
chr1	36397865	36397963	ZH38T0001122	-	36397887	36397919	36397898	TSS	same
chr1	36401201	36401309	ZH38T0001123	+	36401228	36401279	36401262	Intergenic	opposite
chr1	36419094	36419358	ZH38T0001124	-	36419185	36419303	36419185	Intron	same
chr1	36450399	36450485	ZH38T0001125	-	36450439	36450448	36450447	TSS	same
chr1	36461253	36461326	ZH38T0001126	-	36461272	36461274	36461272	Exon	same
chr1	36463935	36464049	ZH38T0001127	-	36463948	36464013	36464012	Proximal	same
chr1	36464135	36464463	ZH38T0001128	-	36464340	36464384	36464359	TSS	same
chr1	36464425	36464518	ZH38T0001129	+	36464465	36464492	36464474	Proximal	opposite
chr1	36481914	36482106	ZH38T0001130	-	36481935	36482079	36481974	Intron	same
chr1	36482729	36483106	ZH38T0001131	-	36482862	36482913	36482912	Proximal	same
chr1	36483202	36483344	ZH38T0001132	-	36483265	36483322	36483265	TSS	same
chr1	36955315	36955455	ZH38T0001133	+	36955325	36955434	36955428	Intron	opposite
chr1	37152630	37152714	ZH38T0001134	-	37152644	37152678	37152677	Intergenic	opposite
chr1	37326137	37326186	ZH38T0001135	+	37326153	37326154	37326153	Intergenic	same
chr1	37474352	37474457	ZH38T0001136	-	37474406	37474425	37474424	TSS	same
chr1	37474492	37474602	ZH38T0001137	+	37474579	37474581	37474579	TSS	same
chr1	37475476	37475576	ZH38T0001138	+	37475498	37475563	37475562	Exon	same
chr1	37514650	37514829	ZH38T0001139	-	37514748	37514774	37514753	TSS	same
chr1	37519001	37519062	ZH38T0001140	+	37519041	37519042	37519041	Intergenic	opposite
chr1	37554167	37554362	ZH38T0001141	-	37554233	37554329	37554304	TSS	same
chr1	37556898	37557075	ZH38T0001142	+	37556936	37556986	37556952	TSS	same
chr1	37559131	37559219	ZH38T0001143	+	37559147	37559186	37559158	Intron	same
chr1	37575092	37575123	ZH38T0001144	+	37575104	37575109	37575108	Intron	opposite
chr1	37595822	37595994	ZH38T0001145	-	37595934	37595949	37595934	TSS	same
chr1	37595967	37596133	ZH38T0001146	+	37596012	37596101	37596037	TSS	same
chr1	37690471	37690592	ZH38T0001147	-	37690513	37690529	37690513	TSS	same
chr1	37692165	37692284	ZH38T0001148	-	37692213	37692252	37692241	Proximal	opposite
chr1	37692408	37692622	ZH38T0001149	+	37692475	37692537	37692495	TSS	same
chr1	37735305	37735522	ZH38T0001150	-	37735431	37735506	37735462	Intron	same
chr1	37752880	37752991	ZH38T0001151	-	37752911	37752958	37752944	TSS	same
chr1	37765063	37765186	ZH38T0001152	-	37765111	37765152	37765145	TSS	same
chr1	37808560	37808695	ZH38T0001153	+	37808590	37808624	37808590	Proximal	opposite
chr1	37859539	37859631	ZH38T0001154	-	37859585	37859608	37859597	TSS	same
chr1	37859704	37859844	ZH38T0001155	+	37859743	37859793	37859763	Proximal	opposite
chr1	37931675	37931805	ZH38T0001156	-	37931729	37931756	37931738	TSS	same
chr1	37945820	37945928	ZH38T0001157	-	37945840	37945875	37945869	Proximal	same
chr1	37946967	37947121	ZH38T0001158	-	37947013	37947060	37947043	TSS	same
chr1	37978980	37979064	ZH38T0001159	-	37978991	37979041	37979004	Exon	same
chr1	37989861	37990127	ZH38T0001160	-	37989991	37990078	37990045	TSS	same
chr1	38005487	38005555	ZH38T0001161	-	38005514	38005517	38005514	TSS	same
chr1	38009259	38009362	ZH38T0001162	+	38009284	38009347	38009346	Intergenic	same
chr1	38012649	38012831	ZH38T0001163	+	38012711	38012737	38012733	TSS	same
chr1	38141537	38141646	ZH38T0001164	-	38141584	38141594	38141588	Intergenic	same
chr1	38721098	38721346	ZH38T0001165	-	38721119	38721330	38721283	Intergenic	opposite
chr1	38728471	38728619	ZH38T0001166	-	38728541	38728571	38728554	Intergenic	opposite
chr1	38859656	38859745	ZH38T0001167	-	38859692	38859728	38859713	Proximal	same
chr1	38859885	38860042	ZH38T0001168	+	38859919	38860000	38859983	TSS	same
chr1	38873293	38873414	ZH38T0001169	-	38873334	38873378	38873350	TSS	same
chr1	38873514	38873583	ZH38T0001170	+	38873550	38873573	38873553	Proximal	opposite
chr1	38941697	38941896	ZH38T0001171	-	38941786	38941828	38941786	TSS	same
chr1	39026118	39026220	ZH38T0001172	+	39026130	39026205	39026130	Proximal	same
chr1	39026224	39026408	ZH38T0001173	+	39026317	39026371	39026324	TSS	same
chr1	39028716	39028919	ZH38T0001174	+	39028739	39028821	39028739	Exon	same
chr1	39043627	39043684	ZH38T0001175	+	39043661	39043669	39043668	Intergenic	same
chr1	39081126	39081190	ZH38T0001176	+	39081136	39081176	39081175	Proximal	same
chr1	39081375	39081510	ZH38T0001177	+	39081398	39081458	39081416	TSS	same
chr1	39114585	39114951	ZH38T0001178	+	39114693	39114878	39114693	Intron	same
chr1	39115063	39115217	ZH38T0001179	+	39115088	39115195	39115124	Intron	same
chr1	39115338	39116031	ZH38T0001180	+	39115363	39116015	39115515	Intron	same
chr1	39158798	39158918	ZH38T0001181	+	39158853	39158870	39158864	Intron	same
chr1	39204626	39204731	ZH38T0001182	+	39204674	39204713	39204674	Proximal	same
chr1	39204740	39204875	ZH38T0001183	+	39204779	39204857	39204856	Exon	same
chr1	39204888	39205114	ZH38T0001184	+	39204958	39204991	39204978	Exon	same
chr1	39214200	39214425	ZH38T0001185	+	39214270	39214401	39214356	Intron	same
chr1	39215201	39215313	ZH38T0001186	+	39215262	39215266	39215264	Proximal	same
chr1	39254447	39254695	ZH38T0001187	+	39254510	39254657	39254526	Intron	same
chr1	39268407	39268512	ZH38T0001188	+	39268471	39268494	39268477	Intron	same
chr1	39300217	39300263	ZH38T0001189	+	39300229	39300252	39300229	Exon	same
chr1	39317202	39317300	ZH38T0001190	+	39317217	39317285	39317217	Exon	same
chr1	39318446	39318622	ZH38T0001191	+	39318491	39318604	39318582	Exon	same
chr1	39319662	39319767	ZH38T0001192	+	39319681	39319739	39319738	Exon	same
chr1	39322590	39322696	ZH38T0001193	+	39322624	39322681	39322643	Exon	same
chr1	39328293	39328366	ZH38T0001194	+	39328304	39328349	39328338	Intron	same
chr1	39333648	39333895	ZH38T0001195	+	39333696	39333803	39333778	Exon	same
chr1	39335215	39335395	ZH38T0001196	+	39335247	39335371	39335356	Exon	same
chr1	39350772	39350964	ZH38T0001197	+	39350803	39350918	39350855	Exon	same
chr1	39360815	39360893	ZH38T0001198	+	39360827	39360882	39360827	Exon	same
chr1	39379197	39379447	ZH38T0001199	+	39379209	39379370	39379209	Exon	same
chr1	39380298	39380349	ZH38T0001200	+	39380322	39380323	39380322	Exon	same
chr1	39385522	39385885	ZH38T0001201	+	39385565	39385863	39385645	Exon	same
chr1	39388147	39388203	ZH38T0001202	+	39388180	39388191	39388183	Exon	same
chr1	39388210	39388344	ZH38T0001203	+	39388234	39388319	39388234	Exon	same
chr1	39388351	39388449	ZH38T0001204	+	39388363	39388398	39388363	Exon	same
chr1	39393704	39393820	ZH38T0001205	+	39393752	39393807	39393752	Intron	same
chr1	39412274	39412527	ZH38T0001206	+	39412358	39412466	39412386	Exon	same
chr1	39432521	39432599	ZH38T0001207	+	39432537	39432550	39432549	Exon	same
chr1	39434409	39434640	ZH38T0001208	+	39434424	39434600	39434475	Exon	same
chr1	39436465	39436501	ZH38T0001209	+	39436477	39436487	39436482	Intron	same
chr1	39439275	39439504	ZH38T0001210	+	39439298	39439435	39439431	Exon	same
chr1	39440976	39441129	ZH38T0001211	+	39441008	39441071	39441008	Exon	same
chr1	39442731	39442918	ZH38T0001212	+	39442741	39442846	39442802	Exon	same
chr1	39444652	39444835	ZH38T0001213	+	39444700	39444816	39444717	Exon	same
chr1	39447739	39447862	ZH38T0001214	+	39447769	39447851	39447769	Exon	same
chr1	39453699	39453856	ZH38T0001215	+	39453709	39453830	39453769	Exon	same
chr1	39459076	39459258	ZH38T0001216	+	39459100	39459203	39459202	Exon	same
chr1	39460623	39460802	ZH38T0001217	+	39460665	39460779	39460665	Exon	same
chr1	39461864	39461981	ZH38T0001218	+	39461880	39461963	39461914	Exon	same
chr1	39484593	39484738	ZH38T0001219	+	39484611	39484721	39484649	Exon	same
chr1	39491604	39491681	ZH38T0001220	+	39491635	39491645	39491635	TSS	same
chr1	39559593	39559715	ZH38T0001221	-	39559659	39559691	39559670	TSS	same
chr1	39565034	39565151	ZH38T0001222	+	39565046	39565119	39565062	TSS	same
chr1	39567774	39567849	ZH38T0001223	-	39567792	39567810	39567792	Proximal	same
chr1	39576737	39576809	ZH38T0001224	-	39576787	39576790	39576787	TSS	same
chr1	39576813	39576902	ZH38T0001225	-	39576835	39576869	39576868	Proximal	same
chr1	39611069	39611137	ZH38T0001226	-	39611084	39611119	39611084	Intergenic	opposite
chr1	39632934	39632994	ZH38T0001227	-	39632943	39632970	39632969	Proximal	opposite
chr1	39639563	39639710	ZH38T0001228	-	39639633	39639670	39639633	TSS	same
chr1	39672021	39672156	ZH38T0001229	-	39672095	39672138	39672106	TSS	same
chr1	39691368	39691487	ZH38T0001230	-	39691407	39691453	39691432	TSS	same
chr1	39738808	39738929	ZH38T0001231	+	39738878	39738892	39738878	TSS	same
chr1	39738936	39739064	ZH38T0001232	+	39738971	39739016	39739010	Proximal	same
chr1	39779925	39780024	ZH38T0001233	+	39779974	39780000	39779978	TSS	same
chr1	39788799	39788890	ZH38T0001234	-	39788820	39788869	39788854	TSS	same
chr1	39799411	39799452	ZH38T0001235	+	39799432	39799438	39799437	TSS	same
chr1	39883427	39883561	ZH38T0001236	-	39883488	39883506	39883505	TSS	same
chr1	39883546	39883626	ZH38T0001237	+	39883563	39883590	39883569	Proximal	opposite
chr1	39955116	39955252	ZH38T0001238	+	39955144	39955150	39955147	TSS	same
chr1	39996105	39996242	ZH38T0001239	+	39996118	39996220	39996211	Intergenic	same
chr1	40039858	40040008	ZH38T0001240	-	40039870	40039974	40039924	Proximal	opposite
chr1	40040183	40040283	ZH38T0001241	+	40040224	40040248	40040239	TSS	same
chr1	40040426	40040505	ZH38T0001242	-	40040445	40040491	40040445	Proximal	opposite
chr1	40040576	40040855	ZH38T0001243	+	40040727	40040773	40040757	TSS	same
chr1	40067212	40067292	ZH38T0001244	+	40067240	40067261	40067255	Intron	same
chr1	40071746	40072205	ZH38T0001245	+	40071783	40072192	40072116	Exon	same
chr1	40097160	40097306	ZH38T0001246	-	40097244	40097252	40097246	TSS	same
chr1	40161219	40161312	ZH38T0001247	-	40161232	40161278	40161232	Proximal	opposite
chr1	40161316	40161476	ZH38T0001248	+	40161376	40161392	40161383	TSS	same
chr1	40238239	40238360	ZH38T0001249	+	40238247	40238327	40238326	Exon	same
chr1	40247869	40247984	ZH38T0001250	+	40247931	40247966	40247936	TSS	same
chr1	40248675	40248749	ZH38T0001251	+	40248701	40248717	40248716	Intron	same
chr1	40257862	40258018	ZH38T0001252	-	40257916	40257950	40257947	TSS	same
chr1	40258026	40258308	ZH38T0001253	+	40258209	40258255	40258235	TSS	same
chr1	40312526	40312656	ZH38T0001254	-	40312583	40312600	40312599	Intron	same
chr1	40317242	40317300	ZH38T0001255	-	40317260	40317286	40317281	TSS	same
chr1	40344778	40344889	ZH38T0001256	+	40344795	40344837	40344833	Intergenic	opposite
chr1	40373666	40373924	ZH38T0001257	+	40373719	40373790	40373766	Intergenic	same
chr1	40374590	40374678	ZH38T0001258	+	40374626	40374645	40374632	Intergenic	same
chr1	40381781	40381821	ZH38T0001259	+	40381800	40381801	40381800	Intergenic	same
chr1	40383797	40383853	ZH38T0001260	+	40383826	40383828	40383827	Intergenic	same
chr1	40385600	40385706	ZH38T0001261	-	40385609	40385647	40385640	Intergenic	opposite
chr1	40388617	40388773	ZH38T0001262	+	40388737	40388738	40388737	Intergenic	same
chr1	40388797	40388861	ZH38T0001263	+	40388810	40388841	40388840	Intergenic	same
chr1	40394942	40394979	ZH38T0001264	-	40394958	40394964	40394958	Intron	opposite
chr1	40406670	40406847	ZH38T0001265	+	40406741	40406818	40406766	Exon	same
chr1	40449975	40450293	ZH38T0001266	+	40450060	40450113	40450079	TSS	same
chr1	40450948	40451032	ZH38T0001267	-	40450977	40451019	40450977	Exon	opposite
chr1	40508607	40508729	ZH38T0001268	-	40508627	40508695	40508627	TSS	same
chr1	40508690	40508818	ZH38T0001269	+	40508730	40508767	40508766	TSS	same
chr1	40531469	40531549	ZH38T0001270	-	40531498	40531531	40531515	Proximal	opposite
chr1	40531518	40531682	ZH38T0001271	+	40531551	40531643	40531560	TSS	same
chr1	40663589	40663778	ZH38T0001272	+	40663686	40663762	40663761	Intron	same
chr1	40691555	40691869	ZH38T0001273	+	40691616	40691798	40691700	TSS	same
chr1	40692003	40692122	ZH38T0001274	-	40692040	40692074	40692063	TSS	same
chr1	40709302	40709425	ZH38T0001275	+	40709326	40709369	40709365	TSS	same
chr1	40979626	40979818	ZH38T0001276	+	40979689	40979797	40979754	TSS	same
chr1	40988467	40988614	ZH38T0001277	+	40988518	40988547	40988518	TSS	same
chr1	41021680	41021780	ZH38T0001278	-	41021707	41021746	41021716	TSS	same
chr1	41168004	41168078	ZH38T0001279	-	41168021	41168064	41168063	Intron	same
chr1	41242068	41242197	ZH38T0001280	-	41242113	41242138	41242118	TSS	same
chr1	41242308	41242441	ZH38T0001281	+	41242332	41242380	41242344	Proximal	same
chr1	41242488	41242573	ZH38T0001282	+	41242527	41242550	41242529	TSS	same
chr1	41243784	41243922	ZH38T0001283	-	41243836	41243888	41243855	Intron	opposite
chr1	41433167	41433278	ZH38T0001284	+	41433196	41433263	41433196	Intergenic	opposite
chr1	41484664	41484701	ZH38T0001285	-	41484682	41484683	41484682	TSS	same
chr1	41486491	41486617	ZH38T0001286	+	41486556	41486602	41486601	Intergenic	opposite
chr1	41662143	41662219	ZH38T0001287	-	41662160	41662201	41662185	Proximal	same
chr1	41918645	41918736	ZH38T0001288	-	41918656	41918704	41918693	TSS	same
chr1	41918859	41918944	ZH38T0001289	-	41918892	41918922	41918921	TSS	same
chr1	42153353	42153550	ZH38T0001290	+	42153409	42153410	42153409	TSS	same
chr1	42163394	42163671	ZH38T0001291	-	42163438	42163599	42163514	Exon	same
chr1	42164625	42164786	ZH38T0001292	-	42164744	42164752	42164744	TSS	same
chr1	42164791	42164835	ZH38T0001293	-	42164812	42164819	42164812	Proximal	same
chr1	42335057	42335271	ZH38T0001294	-	42335176	42335218	42335217	TSS	same
chr1	42335829	42335922	ZH38T0001295	-	42335879	42335880	42335879	TSS	same
chr1	42455949	42456072	ZH38T0001296	-	42456011	42456056	42456034	TSS	same
chr1	42456209	42456291	ZH38T0001297	-	42456249	42456271	42456259	Proximal	same
chr1	42456315	42456392	ZH38T0001298	+	42456329	42456351	42456337	Proximal	same
chr1	42456460	42456773	ZH38T0001299	+	42456542	42456562	42456558	TSS	same
chr1	42463194	42463387	ZH38T0001300	+	42463285	42463333	42463308	TSS	same
chr1	42628665	42628698	ZH38T0001301	+	42628680	42628682	42628680	Intron	same
chr1	42658317	42658520	ZH38T0001302	+	42658422	42658436	42658422	TSS	same
chr1	42658669	42658783	ZH38T0001303	+	42658700	42658744	42658700	TSS	same
chr1	42659173	42659298	ZH38T0001304	+	42659235	42659255	42659237	Exon	same
chr1	42682079	42682236	ZH38T0001305	-	42682133	42682177	42682159	TSS	same
chr1	42682372	42682478	ZH38T0001306	+	42682393	42682427	42682426	TSS	same
chr1	42682597	42682659	ZH38T0001307	+	42682613	42682635	42682634	Proximal	same
chr1	42683180	42683255	ZH38T0001308	+	42683193	42683228	42683227	Intron	same
chr1	42683390	42683476	ZH38T0001309	+	42683403	42683451	42683403	Exon	same
chr1	42693274	42693347	ZH38T0001310	+	42693286	42693321	42693290	Intron	same
chr1	42696191	42696294	ZH38T0001311	+	42696209	42696280	42696237	Exon	same
chr1	42696616	42696949	ZH38T0001312	+	42696630	42696855	42696729	Exon	same
chr1	42700692	42700761	ZH38T0001313	+	42700720	42700733	42700720	Intron	same
chr1	42740182	42740350	ZH38T0001314	-	42740226	42740285	42740284	TSS	same
chr1	42766707	42766738	ZH38T0001315	+	42766721	42766722	42766721	Proximal	opposite
chr1	42766967	42767071	ZH38T0001316	-	42766985	42767032	42767031	TSS	same
chr1	42767185	42767382	ZH38T0001317	+	42767248	42767293	42767291	TSS	same
chr1	42816588	42816693	ZH38T0001318	-	42816600	42816670	42816669	Proximal	same
chr1	42816926	42817080	ZH38T0001319	-	42816973	42817033	42817010	Proximal	same
chr1	42817073	42817148	ZH38T0001320	+	42817121	42817134	42817121	TSS	same
chr1	42817189	42817389	ZH38T0001321	-	42817271	42817337	42817323	Proximal	same
chr1	42825489	42825674	ZH38T0001322	+	42825530	42825651	42825607	TSS	same
chr1	42846378	42846451	ZH38T0001323	-	42846402	42846422	42846413	TSS	same
chr1	42846575	42846665	ZH38T0001324	+	42846613	42846634	42846613	TSS	same
chr1	42924389	42924489	ZH38T0001325	+	42924436	42924460	42924459	Intergenic	same
chr1	42929902	42929945	ZH38T0001326	+	42929917	42929929	42929928	Exon	opposite
chr1	42958814	42958956	ZH38T0001327	-	42958863	42958871	42958870	TSS	same
chr1	42958968	42959112	ZH38T0001328	+	42959029	42959078	42959041	TSS	same
chr1	43119987	43120183	ZH38T0001329	+	43120042	43120148	43120147	Intergenic	same
chr1	43147846	43148010	ZH38T0001330	+	43147903	43147946	43147910	TSS	same
chr1	43172036	43172348	ZH38T0001331	-	43172252	43172283	43172262	TSS	same
chr1	43172312	43172435	ZH38T0001332	+	43172329	43172377	43172340	TSS	same
chr1	43172493	43172601	ZH38T0001333	-	43172515	43172578	43172561	TSS	same
chr1	43228005	43228169	ZH38T0001334	-	43228054	43228149	43228073	Intron	opposite
chr1	43235038	43235085	ZH38T0001335	-	43235060	43235069	43235060	Intron	opposite
chr1	43235110	43235236	ZH38T0001336	-	43235182	43235191	43235190	Intron	opposite
chr1	43248001	43248117	ZH38T0001337	-	43248038	43248098	43248038	Intron	opposite
chr1	43250345	43250522	ZH38T0001338	-	43250373	43250501	43250373	Intron	opposite
chr1	43269958	43270097	ZH38T0001339	+	43269982	43270082	43269982	TSS	same
chr1	43270584	43270770	ZH38T0001340	+	43270667	43270713	43270688	Exon	same
chr1	43270934	43270968	ZH38T0001341	-	43270946	43270953	43270952	Intron	opposite
chr1	43285516	43285630	ZH38T0001342	-	43285575	43285613	43285575	TSS	same
chr1	43300953	43301040	ZH38T0001343	+	43300990	43301020	43301008	TSS	same
chr1	43302412	43302482	ZH38T0001344	+	43302427	43302465	43302458	Intron	same
chr1	43358653	43358715	ZH38T0001345	-	43358663	43358692	43358675	TSS	same
chr1	43358856	43359137	ZH38T0001346	+	43358943	43358986	43358980	TSS	same
chr1	43366182	43366394	ZH38T0001347	-	43366307	43366353	43366347	Intron	same
chr1	43367524	43367631	ZH38T0001348	-	43367534	43367619	43367601	Proximal	same
chr1	43367911	43368097	ZH38T0001349	-	43367976	43368019	43368010	TSS	same
chr1	43368137	43368266	ZH38T0001350	+	43368177	43368216	43368207	Proximal	opposite
chr1	43389727	43389846	ZH38T0001351	-	43389787	43389812	43389799	TSS	same
chr1	43389858	43389990	ZH38T0001352	+	43389891	43389940	43389898	TSS	same
chr1	43417845	43418014	ZH38T0001353	+	43417930	43418000	43417965	Intron	same
chr1	43525041	43525206	ZH38T0001354	+	43525091	43525097	43525091	Intergenic	same
chr1	43530869	43531021	ZH38T0001355	+	43530882	43530925	43530900	TSS	same
chr1	43536727	43536790	ZH38T0001356	+	43536738	43536775	43536774	Intron	same
chr1	43537571	43537765	ZH38T0001357	+	43537615	43537737	43537705	Intron	same
chr1	43538198	43538285	ZH38T0001358	+	43538226	43538258	43538228	Exon	same
chr1	43553487	43553612	ZH38T0001359	+	43553543	43553597	43553543	Exon	same
chr1	43650061	43650193	ZH38T0001360	+	43650133	43650166	43650148	TSS	same
chr1	43650424	43650550	ZH38T0001361	+	43650456	43650506	43650471	Proximal	same
chr1	43707320	43707405	ZH38T0001362	-	43707333	43707371	43707368	TSS	same
chr1	43720544	43720618	ZH38T0001363	-	43720589	43720590	43720589	Intron	same
chr1	43933725	43933838	ZH38T0001364	+	43933740	43933801	43933740	TSS	same
chr1	43946534	43946672	ZH38T0001365	-	43946562	43946631	43946623	Proximal	same
chr1	43946778	43946851	ZH38T0001366	+	43946803	43946840	43946803	Proximal	same
chr1	43946871	43947035	ZH38T0001367	+	43946922	43946969	43946964	TSS	same
chr1	43969944	43970036	ZH38T0001368	+	43969987	43970011	43969998	TSS	same
chr1	43974866	43975042	ZH38T0001369	+	43974925	43974967	43974959	TSS	same
chr1	43991548	43991657	ZH38T0001370	+	43991559	43991602	43991599	TSS	same
chr1	43991764	43991846	ZH38T0001371	+	43991778	43991826	43991825	Proximal	same
chr1	43992169	43992231	ZH38T0001372	+	43992187	43992208	43992201	Intron	same
chr1	43994987	43995062	ZH38T0001373	+	43994999	43995034	43995026	Intron	same
chr1	44030416	44030456	ZH38T0001374	+	44030430	44030440	44030430	TSS	same
chr1	44031329	44031405	ZH38T0001375	-	44031344	44031375	44031374	TSS	same
chr1	44031422	44031562	ZH38T0001376	-	44031434	44031514	44031461	Proximal	same
chr1	44035857	44035978	ZH38T0001377	-	44035902	44035933	44035932	Intron	opposite
chr1	44048233	44048400	ZH38T0001378	+	44048269	44048375	44048374	TSS	same
chr1	44048425	44048487	ZH38T0001379	+	44048439	44048458	44048439	TSS	same
chr1	44213423	44213547	ZH38T0001380	+	44213454	44213484	44213470	TSS	same
chr1	44244241	44244347	ZH38T0001381	-	44244274	44244303	44244282	TSS	same
chr1	44262475	44262562	ZH38T0001382	-	44262487	44262550	44262507	Intron	same
chr1	44277193	44277276	ZH38T0001383	-	44277217	44277234	44277228	Intron	same
chr1	44339031	44339062	ZH38T0001384	-	44339045	44339046	44339045	Exon	same
chr1	44352835	44352869	ZH38T0001385	-	44352851	44352852	44352851	Exon	same
chr1	44352901	44352945	ZH38T0001386	-	44352926	44352927	44352926	Exon	same
chr1	44355260	44355325	ZH38T0001387	-	44355277	44355290	44355277	Proximal	same
chr1	44405128	44405265	ZH38T0001388	+	44405150	44405193	44405176	TSS	same
chr1	44547486	44547540	ZH38T0001389	-	44547520	44547524	44547523	Intron	opposite
chr1	44649548	44649751	ZH38T0001390	+	44649590	44649692	44649681	Intron	same
chr1	44674390	44674517	ZH38T0001391	-	44674435	44674488	44674458	TSS	same
chr1	44674663	44674799	ZH38T0001392	+	44674699	44674744	44674713	TSS	same
chr1	44721882	44721926	ZH38T0001393	-	44721905	44721906	44721905	TSS	same
chr1	44723704	44723822	ZH38T0001394	+	44723761	44723794	44723773	Intron	same
chr1	44731147	44731190	ZH38T0001395	-	44731169	44731170	44731169	TSS	same
chr1	44739683	44739751	ZH38T0001396	+	44739697	44739723	44739697	Proximal	same
chr1	44739764	44739946	ZH38T0001397	+	44739829	44739862	44739836	TSS	same
chr1	44746349	44746494	ZH38T0001398	+	44746372	44746419	44746389	TSS	same
chr1	44775367	44775474	ZH38T0001399	+	44775383	44775436	44775400	Proximal	same
chr1	44775398	44775520	ZH38T0001400	-	44775448	44775489	44775481	Proximal	same
chr1	44775517	44775614	ZH38T0001401	+	44775573	44775574	44775573	TSS	same
chr1	44776478	44776506	ZH38T0001402	+	44776491	44776492	44776491	TSS	same
chr1	44776665	44776782	ZH38T0001403	+	44776698	44776763	44776698	Proximal	same
chr1	44777598	44777793	ZH38T0001404	+	44777619	44777765	44777753	Proximal	same
chr1	44777965	44778124	ZH38T0001405	+	44778022	44778090	44778059	Proximal	same
chr1	44780728	44780761	ZH38T0001406	-	44780744	44780745	44780744	Proximal	same
chr1	44788153	44788204	ZH38T0001407	-	44788170	44788172	44788170	TSS	same
chr1	44808476	44808663	ZH38T0001408	+	44808518	44808557	44808534	TSS	same
chr1	44819979	44820015	ZH38T0001409	-	44819996	44819997	44819996	TSS	same
chr1	44843150	44843407	ZH38T0001410	-	44843252	44843340	44843252	TSS	same
chr1	44986499	44986643	ZH38T0001411	-	44986573	44986599	44986583	TSS	same
chr1	45012102	45012297	ZH38T0001412	+	45012245	45012258	45012254	TSS	same
chr1	45012739	45012835	ZH38T0001413	+	45012766	45012811	45012785	Intron	same
chr1	45014490	45014546	ZH38T0001414	+	45014510	45014534	45014510	Exon	same
chr1	45205818	45205880	ZH38T0001415	-	45205845	45205864	45205858	Exon	same
chr1	45303817	45303913	ZH38T0001416	+	45303831	45303899	45303892	TSS	same
chr1	45326846	45326938	ZH38T0001417	+	45326874	45326897	45326896	TSS	same
chr1	45339952	45340079	ZH38T0001418	-	45340005	45340030	45340008	TSS	same
chr1	45340057	45340254	ZH38T0001419	+	45340116	45340232	45340169	TSS	same
chr1	45340088	45340154	ZH38T0001420	-	45340104	45340120	45340119	TSS	same
chr1	45340377	45340478	ZH38T0001421	-	45340394	45340438	45340416	TSS	same
chr1	45491068	45491209	ZH38T0001422	-	45491133	45491159	45491157	TSS	same
chr1	45499949	45500122	ZH38T0001423	-	45499999	45500092	45500057	TSS	same
chr1	45500186	45500394	ZH38T0001424	+	45500309	45500335	45500315	TSS	same
chr1	45521672	45522038	ZH38T0001425	-	45521883	45521886	45521883	TSS	same
chr1	45522051	45522147	ZH38T0001426	+	45522068	45522089	45522068	Proximal	opposite
chr1	45522769	45522936	ZH38T0001427	-	45522822	45522859	45522858	Intergenic	same
chr1	45522957	45523025	ZH38T0001428	-	45522970	45523004	45522977	Intergenic	same
chr1	45550686	45550756	ZH38T0001429	-	45550700	45550743	45550742	Proximal	opposite
chr1	45550778	45550920	ZH38T0001430	+	45550821	45550894	45550893	TSS	same
chr1	45551019	45551145	ZH38T0001431	+	45551064	45551094	45551093	TSS	same
chr1	45583966	45584214	ZH38T0001432	+	45584036	45584045	45584036	TSS	same
chr1	45584748	45584843	ZH38T0001433	+	45584782	45584832	45584782	Intron	same
chr1	45591209	45591282	ZH38T0001434	+	45591226	45591265	45591264	Exon	same
chr1	45602254	45602371	ZH38T0001435	+	45602287	45602358	45602287	Exon	same
chr1	45607258	45607386	ZH38T0001436	+	45607294	45607319	45607294	Exon	same
chr1	45607419	45607600	ZH38T0001437	+	45607484	45607587	45607524	Exon	same
chr1	45608061	45608150	ZH38T0001438	+	45608076	45608103	45608076	Exon	same
chr1	45609856	45609942	ZH38T0001439	+	45609892	45609913	45609912	Intron	same
chr1	45623952	45624105	ZH38T0001440	-	45624026	45624057	45624052	TSS	same
chr1	45686462	45686589	ZH38T0001441	-	45686521	45686549	45686534	TSS	same
chr1	45687033	45687193	ZH38T0001442	-	45687069	45687122	45687073	Intergenic	same
chr1	45687334	45687394	ZH38T0001443	+	45687350	45687353	45687350	Intergenic	same
chr1	45688039	45688148	ZH38T0001444	-	45688056	45688093	45688080	Proximal	opposite
chr1	45688137	45688258	ZH38T0001445	+	45688174	45688196	45688180	TSS	same
chr1	45750602	45750679	ZH38T0001446	-	45750623	45750653	45750623	TSS	same
chr1	45803565	45803641	ZH38T0001447	+	45803581	45803612	45803611	TSS	same
chr1	45864279	45864398	ZH38T0001448	+	45864289	45864360	45864359	Intron	same
chr1	45913473	45913640	ZH38T0001449	+	45913529	45913596	45913586	Intron	same
chr1	46037491	46037522	ZH38T0001450	+	46037505	46037506	46037505	Intergenic	same
chr1	46132605	46132664	ZH38T0001451	-	46132628	46132629	46132628	TSS	same
chr1	46132768	46133105	ZH38T0001452	-	46132854	46133039	46132915	TSS	same
chr1	46133106	46133273	ZH38T0001453	+	46133120	46133232	46133178	Proximal	opposite
chr1	46174775	46174861	ZH38T0001454	+	46174800	46174840	46174839	Proximal	same
chr1	46174891	46174950	ZH38T0001455	-	46174922	46174934	46174922	Proximal	opposite
chr1	46175050	46175142	ZH38T0001456	+	46175086	46175093	46175086	TSS	same
chr1	46176435	46176557	ZH38T0001457	-	46176487	46176525	46176489	TSS	same
chr1	46180357	46180417	ZH38T0001458	+	46180368	46180400	46180399	Intron	same
chr1	46180435	46180667	ZH38T0001459	+	46180524	46180533	46180524	Exon	same
chr1	46181592	46181665	ZH38T0001460	+	46181621	46181644	46181632	Intron	same
chr1	46184586	46184671	ZH38T0001461	+	46184602	46184653	46184602	Exon	same
chr1	46197421	46197523	ZH38T0001462	-	46197452	46197480	46197452	Intron	same
chr1	46198348	46198457	ZH38T0001463	-	46198421	46198439	46198437	TSS	same
chr1	46198473	46198559	ZH38T0001464	+	46198490	46198522	46198490	Proximal	opposite
chr1	46203274	46203393	ZH38T0001465	+	46203330	46203374	46203352	TSS	same
chr1	46220265	46220338	ZH38T0001466	-	46220279	46220324	46220301	TSS	same
chr1	46247655	46247822	ZH38T0001467	+	46247737	46247778	46247755	TSS	same
chr1	46303120	46303397	ZH38T0001468	-	46303186	46303320	46303276	TSS	same
chr1	46303601	46303840	ZH38T0001469	+	46303668	46303720	46303703	TSS	same
chr1	46320493	46320592	ZH38T0001470	+	46320520	46320569	46320548	Intergenic	same
chr1	46332082	46332277	ZH38T0001471	-	46332136	46332179	46332178	Intergenic	opposite
chr1	46340676	46340872	ZH38T0001472	+	46340767	46340819	46340788	Proximal	same
chr1	46340978	46341153	ZH38T0001473	-	46341035	46341094	46341075	Proximal	opposite
chr1	46341159	46341254	ZH38T0001474	+	46341183	46341226	46341203	TSS	same
chr1	46410768	46410847	ZH38T0001475	+	46410787	46410828	46410827	Intron	same
chr1	46442820	46442918	ZH38T0001476	+	46442859	46442888	46442867	TSS	same
chr1	46489785	46489945	ZH38T0001477	+	46489835	46489896	46489835	Intergenic	same
chr1	46604187	46604320	ZH38T0001478	-	46604239	46604255	46604248	TSS	same
chr1	46616797	46616889	ZH38T0001479	-	46616813	46616846	46616813	Proximal	same
chr1	46665835	46665934	ZH38T0001480	-	46665854	46665888	46665878	TSS	same
chr1	46671782	46671972	ZH38T0001481	+	46671823	46671902	46671882	TSS	same
chr1	46718109	46718223	ZH38T0001482	-	46718147	46718184	46718173	Exon	same
chr1	46719058	46719163	ZH38T0001483	-	46719097	46719123	46719116	TSS	same
chr1	46798947	46799264	ZH38T0001484	+	46799042	46799043	46799042	TSS	same
chr1	46804283	46804398	ZH38T0001485	+	46804345	46804380	46804354	Intron	same
chr1	46857522	46857698	ZH38T0001486	+	46857588	46857676	46857588	Intron	opposite
chr1	46897760	46897837	ZH38T0001487	+	46897775	46897793	46897775	Intron	opposite
chr1	46900408	46900629	ZH38T0001488	-	46900470	46900528	46900474	TSS	same
chr1	46941235	46941544	ZH38T0001489	-	46941468	46941476	46941475	TSS	same
chr1	46976763	46976856	ZH38T0001490	+	46976777	46976836	46976777	Intergenic	opposite
chr1	47004158	47004201	ZH38T0001491	+	47004182	47004183	47004182	Intergenic	opposite
chr1	47023555	47023605	ZH38T0001492	+	47023571	47023573	47023572	Proximal	same
chr1	47023619	47023737	ZH38T0001493	+	47023663	47023708	47023668	TSS	same
chr1	47023831	47023925	ZH38T0001494	+	47023871	47023908	47023900	Proximal	same
chr1	47067384	47067493	ZH38T0001495	+	47067410	47067454	47067449	Proximal	same
chr1	47137378	47137590	ZH38T0001496	+	47137442	47137446	47137442	TSS	same
chr1	47189857	47190209	ZH38T0001497	-	47190019	47190065	47190035	TSS	same
chr1	47232201	47232273	ZH38T0001498	-	47232218	47232236	47232224	Intergenic	same
chr1	47314037	47314240	ZH38T0001499	-	47314111	47314138	47314128	TSS	same
chr1	47314424	47314535	ZH38T0001500	+	47314475	47314518	47314475	Proximal	opposite
chr1	47333623	47333753	ZH38T0001501	-	47333650	47333740	47333682	Proximal	opposite
chr1	47333834	47334120	ZH38T0001502	+	47333883	47333941	47333907	TSS	same
chr1	47533702	47533760	ZH38T0001503	+	47533713	47533736	47533721	Intergenic	same
chr1	48196327	48196370	ZH38T0001504	-	48196348	48196349	48196348	Intron	opposite
chr1	48211141	48211243	ZH38T0001505	+	48211162	48211232	48211206	Intergenic	same
chr1	48222690	48222812	ZH38T0001506	+	48222715	48222751	48222715	Proximal	same
chr1	48247381	48247451	ZH38T0001507	-	48247394	48247436	48247435	Exon	opposite
chr1	48402671	48402768	ZH38T0001508	-	48402724	48402735	48402734	Intron	same
chr1	48471971	48472087	ZH38T0001509	-	48472005	48472024	48472021	TSS	same
chr1	48472114	48472233	ZH38T0001510	-	48472176	48472204	48472176	TSS	same
chr1	48776729	48776911	ZH38T0001511	-	48776807	48776891	48776840	TSS	same
chr1	49048270	49048360	ZH38T0001512	-	49048281	49048328	49048327	Exon	opposite
chr1	49048462	49048545	ZH38T0001513	+	49048475	49048508	49048479	Intron	same
chr1	49257794	49257848	ZH38T0001514	-	49257817	49257829	49257817	Proximal	opposite
chr1	49623073	49623186	ZH38T0001515	+	49623094	49623171	49623098	Intron	opposite
chr1	50023845	50023998	ZH38T0001516	-	50023886	50023924	50023912	TSS	same
chr1	50023969	50024096	ZH38T0001517	+	50023998	50024061	50024028	Proximal	opposite
chr1	50048004	50048147	ZH38T0001518	+	50048031	50048122	50048064	TSS	same
chr1	50103676	50103809	ZH38T0001519	+	50103688	50103797	50103688	Proximal	same
chr1	50103822	50104042	ZH38T0001520	+	50103854	50103909	50103908	TSS	same
chr1	50104104	50104157	ZH38T0001521	+	50104116	50104132	50104131	Proximal	same
chr1	50105599	50105776	ZH38T0001522	+	50105677	50105739	50105687	TSS	same
chr1	50106156	50106338	ZH38T0001523	-	50106179	50106308	50106190	TSS	opposite
chr1	50106211	50106302	ZH38T0001524	+	50106227	50106282	50106227	TSS	same
chr1	50108664	50108812	ZH38T0001525	-	50108750	50108787	50108783	Proximal	opposite
chr1	50108890	50108992	ZH38T0001526	+	50108919	50108944	50108919	TSS	same
chr1	50109763	50109951	ZH38T0001527	+	50109804	50109845	50109832	TSS	same
chr1	50120728	50120786	ZH38T0001528	+	50120740	50120765	50120764	Intron	same
chr1	50321086	50321186	ZH38T0001529	-	50321123	50321161	50321123	TSS	same
chr1	50779353	50779453	ZH38T0001530	-	50779365	50779439	50779410	Intron	same
chr1	50960190	50960277	ZH38T0001531	-	50960220	50960257	50960243	TSS	same
chr1	50960323	50960410	ZH38T0001532	+	50960342	50960390	50960368	Proximal	same
chr1	50968490	50968596	ZH38T0001533	-	50968534	50968585	50968544	Proximal	opposite
chr1	50968615	50968830	ZH38T0001534	+	50968679	50968804	50968705	TSS	same
chr1	50968961	50969053	ZH38T0001535	+	50968982	50969015	50968982	Proximal	same
chr1	50970065	50970199	ZH38T0001536	-	50970095	50970172	50970098	Proximal	opposite
chr1	50970226	50970301	ZH38T0001537	+	50970244	50970256	50970253	TSS	same
chr1	51102199	51102289	ZH38T0001538	+	51102227	51102262	51102241	TSS	same
chr1	51297859	51298011	ZH38T0001539	-	51297890	51297998	51297945	TSS	same
chr1	51322219	51322293	ZH38T0001540	-	51322254	51322261	51322254	TSS	same
chr1	51325884	51325999	ZH38T0001541	-	51325928	51325972	51325932	Intron	same
chr1	51326014	51326142	ZH38T0001542	+	51326028	51326088	51326068	Intron	opposite
chr1	51329644	51329785	ZH38T0001543	+	51329654	51329772	51329721	TSS	same
chr1	51345013	51345104	ZH38T0001544	-	51345040	51345089	51345059	Proximal	same
chr1	51399022	51399166	ZH38T0001545	-	51399033	51399106	51399034	Exon	same
chr1	51421780	51422201	ZH38T0001546	-	51422065	51422149	51422089	Intron	same
chr1	51423422	51423587	ZH38T0001547	-	51423455	51423508	51423503	Intron	same
chr1	51518213	51518349	ZH38T0001548	+	51518271	51518295	51518294	Proximal	same
chr1	51518891	51518960	ZH38T0001549	-	51518914	51518944	51518943	Proximal	same
chr1	51519199	51519355	ZH38T0001550	-	51519246	51519323	51519265	TSS	same
chr1	51617050	51617206	ZH38T0001551	+	51617088	51617092	51617091	TSS	same
chr1	51669396	51669534	ZH38T0001552	+	51669429	51669510	51669439	Exon	same
chr1	51729800	51729904	ZH38T0001553	+	51729828	51729857	51729837	TSS	same
chr1	51785797	51785892	ZH38T0001554	+	51785816	51785852	51785817	Exon	same
chr1	51786506	51786624	ZH38T0001555	+	51786513	51786616	51786540	Exon	same
chr1	51801050	51801125	ZH38T0001556	-	51801067	51801108	51801107	Proximal	opposite
chr1	51846721	51846799	ZH38T0001557	-	51846740	51846741	51846740	Intron	same
chr1	51878288	51878812	ZH38T0001558	-	51878690	51878753	51878752	TSS	same
chr1	51977231	51977305	ZH38T0001559	-	51977271	51977290	51977271	Intron	same
chr1	51990566	51990773	ZH38T0001560	-	51990691	51990736	51990692	TSS	same
chr1	52033744	52033839	ZH38T0001561	-	52033783	52033798	52033789	TSS	same
chr1	52055100	52055246	ZH38T0001562	-	52055171	52055226	52055203	TSS	same
chr1	52055237	52055361	ZH38T0001563	+	52055255	52055320	52055281	Proximal	opposite
chr1	52055658	52055786	ZH38T0001564	-	52055700	52055753	52055700	Proximal	same
chr1	52056072	52056197	ZH38T0001565	-	52056148	52056180	52056179	TSS	same
chr1	52056228	52056371	ZH38T0001566	+	52056300	52056332	52056322	TSS	same
chr1	52366087	52366255	ZH38T0001567	-	52366127	52366178	52366149	TSS	same
chr1	52404385	52404484	ZH38T0001568	-	52404414	52404469	52404416	TSS	same
chr1	52404518	52404637	ZH38T0001569	+	52404563	52404618	52404601	TSS	same
chr1	52552909	52553142	ZH38T0001570	-	52553030	52553100	52553084	TSS	same
chr1	52553431	52553507	ZH38T0001571	-	52553445	52553488	52553462	Proximal	same
chr1	52553548	52553716	ZH38T0001572	+	52553572	52553697	52553684	Intergenic	opposite
chr1	52602337	52602533	ZH38T0001573	+	52602370	52602400	52602399	TSS	same
chr1	52637537	52637619	ZH38T0001574	-	52637573	52637590	52637589	Intron	opposite
chr1	52698036	52698123	ZH38T0001575	-	52698064	52698109	52698076	Proximal	same
chr1	52698307	52698395	ZH38T0001576	-	52698335	52698351	52698346	TSS	same
chr1	52703099	52703206	ZH38T0001577	+	52703120	52703160	52703148	Intergenic	opposite
chr1	52708366	52708450	ZH38T0001578	-	52708380	52708402	52708380	Intergenic	opposite
chr1	52842695	52842965	ZH38T0001579	+	52842756	52842869	52842852	TSS	same
chr1	52907105	52907261	ZH38T0001580	-	52907170	52907213	52907170	Intron	same
chr1	52913072	52913234	ZH38T0001581	-	52913120	52913158	52913157	Intron	same
chr1	52921500	52921556	ZH38T0001582	-	52921514	52921544	52921543	Proximal	same
chr1	52921621	52921870	ZH38T0001583	-	52921705	52921758	52921728	TSS	same
chr1	52927227	52927403	ZH38T0001584	+	52927285	52927343	52927326	TSS	same
chr1	53011464	53011595	ZH38T0001585	+	53011478	53011532	53011527	Intron	same
chr1	53014883	53015049	ZH38T0001586	+	53014952	53015011	53014973	TSS	same
chr1	53062139	53062303	ZH38T0001587	+	53062212	53062213	53062212	TSS	same
chr1	53082398	53082608	ZH38T0001588	+	53082405	53082594	53082501	Intron	same
chr1	53083485	53083563	ZH38T0001589	+	53083497	53083543	53083542	Intron	same
chr1	53083690	53083744	ZH38T0001590	+	53083703	53083730	53083703	Intron	same
chr1	53083795	53083886	ZH38T0001591	+	53083806	53083864	53083829	Intron	same
chr1	53196748	53196909	ZH38T0001592	+	53196799	53196851	53196799	TSS	same
chr1	53220253	53220450	ZH38T0001593	-	53220314	53220361	53220348	Proximal	same
chr1	53220556	53220677	ZH38T0001594	-	53220594	53220627	53220616	TSS	same
chr1	53238438	53238631	ZH38T0001595	-	53238492	53238533	53238529	TSS	same
chr1	53238537	53238627	ZH38T0001596	+	53238549	53238598	53238591	TSS	same
chr1	53238663	53238762	ZH38T0001597	+	53238686	53238743	53238686	Proximal	same
chr1	53326054	53326154	ZH38T0001598	-	53326071	53326127	53326126	Intron	same
chr1	53328192	53328304	ZH38T0001599	+	53328217	53328248	53328222	TSS	same
chr1	53333133	53333212	ZH38T0001600	-	53333152	53333200	53333152	Intron	opposite
chr1	53350273	53350348	ZH38T0001601	-	53350310	53350313	53350310	Intron	opposite
chr1	53460526	53460571	ZH38T0001602	+	53460538	53460559	53460538	Intron	same
chr1	53838240	53838380	ZH38T0001603	-	53838281	53838330	53838298	TSS	same
chr1	53838487	53838584	ZH38T0001604	-	53838497	53838574	53838503	Proximal	same
chr1	53889744	53889863	ZH38T0001605	-	53889787	53889817	53889801	TSS	same
chr1	53894132	53894245	ZH38T0001606	+	53894186	53894194	53894186	TSS	same
chr1	53940146	53940191	ZH38T0001607	-	53940170	53940172	53940170	Proximal	same
chr1	53945554	53945762	ZH38T0001608	-	53945573	53945699	53945698	TSS	same
chr1	53946248	53946332	ZH38T0001609	-	53946277	53946308	53946307	Proximal	same
chr1	53946314	53946503	ZH38T0001610	+	53946338	53946422	53946406	TSS	same
chr1	54003613	54003649	ZH38T0001611	-	54003630	54003631	54003630	Intergenic	same
chr1	54018067	54018214	ZH38T0001612	-	54018142	54018189	54018182	TSS	same
chr1	54047263	54047384	ZH38T0001613	-	54047279	54047361	54047360	Exon	same
chr1	54053080	54053314	ZH38T0001614	-	54053203	54053225	54053203	TSS	same
chr1	54053368	54053508	ZH38T0001615	-	54053411	54053441	54053420	TSS	same
chr1	54053556	54053647	ZH38T0001616	+	54053583	54053632	54053607	TSS	same
chr1	54199978	54200062	ZH38T0001617	-	54199996	54200030	54200022	Proximal	opposite
chr1	54200125	54200314	ZH38T0001618	+	54200182	54200196	54200193	TSS	same
chr1	54241095	54241228	ZH38T0001619	-	54241134	54241211	54241168	Intron	same
chr1	54241446	54241621	ZH38T0001620	-	54241497	54241576	54241545	Intron	same
chr1	54242161	54242328	ZH38T0001621	-	54242250	54242285	54242262	Intron	same
chr1	54277305	54277463	ZH38T0001622	-	54277363	54277365	54277364	Intron	same
chr1	54401850	54401956	ZH38T0001623	-	54401861	54401930	54401891	Exon	same
chr1	54413442	54413549	ZH38T0001624	-	54413473	54413493	54413492	Intergenic	opposite
chr1	54542220	54542351	ZH38T0001625	+	54542259	54542284	54542283	Intergenic	same
chr1	54542449	54542593	ZH38T0001626	+	54542470	54542549	54542470	Intergenic	same
chr1	54544212	54544359	ZH38T0001627	-	54544238	54544305	54544273	Intergenic	opposite
chr1	54548165	54548323	ZH38T0001628	+	54548221	54548255	54548254	TSS	same
chr1	54564514	54564607	ZH38T0001629	+	54564547	54564584	54564583	Intron	same
chr1	54590299	54590367	ZH38T0001630	+	54590329	54590353	54590352	Intron	same
chr1	54592519	54592578	ZH38T0001631	+	54592546	54592550	54592546	Exon	same
chr1	54623267	54623618	ZH38T0001632	-	54623508	54623525	54623524	TSS	same
chr1	54641720	54641852	ZH38T0001633	+	54641776	54641810	54641785	TSS	same
chr1	54715778	54715922	ZH38T0001634	+	54715850	54715885	54715862	TSS	same
chr1	54764475	54764570	ZH38T0001635	-	54764501	54764539	54764522	TSS	same
chr1	54801246	54801357	ZH38T0001636	-	54801281	54801323	54801312	TSS	same
chr1	54806029	54806155	ZH38T0001637	+	54806044	54806094	54806090	TSS	same
chr1	54807521	54807596	ZH38T0001638	+	54807547	54807574	54807570	Exon	same
chr1	54814349	54814427	ZH38T0001639	+	54814366	54814408	54814407	Intron	same
chr1	54865600	54865739	ZH38T0001640	-	54865642	54865688	54865666	Intron	same
chr1	54875078	54875111	ZH38T0001641	+	54875093	54875094	54875093	Proximal	same
chr1	54875956	54876009	ZH38T0001642	+	54875973	54875975	54875974	Exon	opposite
chr1	54886799	54886872	ZH38T0001643	+	54886814	54886860	54886859	Proximal	same
chr1	54887015	54887258	ZH38T0001644	-	54887184	54887200	54887194	TSS	same
chr1	54887344	54887475	ZH38T0001645	+	54887365	54887454	54887394	Proximal	same
chr1	54900056	54900194	ZH38T0001646	+	54900092	54900156	54900153	Intergenic	same
chr1	54980578	54980664	ZH38T0001647	+	54980611	54980628	54980627	TSS	same
chr1	55039471	55039649	ZH38T0001648	+	55039537	55039566	55039547	TSS	same
chr1	55214610	55214834	ZH38T0001649	-	55214629	55214732	55214675	Intron	same
chr1	55581068	55581176	ZH38T0001650	+	55581102	55581125	55581111	Proximal	same
chr1	55854761	55855085	ZH38T0001651	-	55854798	55854948	55854879	Intron	opposite
chr1	55857868	55857998	ZH38T0001652	+	55857879	55857968	55857914	Intron	same
chr1	56062046	56062134	ZH38T0001653	+	56062065	56062069	56062065	Intron	same
chr1	56134008	56134102	ZH38T0001654	-	56134028	56134068	56134051	Intergenic	opposite
chr1	56414902	56415119	ZH38T0001655	+	56414934	56415064	56415027	TSS	same
chr1	56439796	56439882	ZH38T0001656	+	56439824	56439853	56439852	Intron	opposite
chr1	56516995	56517047	ZH38T0001657	-	56517010	56517032	56517029	Intron	same
chr1	56524365	56524498	ZH38T0001658	-	56524381	56524446	56524429	TSS	same
chr1	56560912	56561017	ZH38T0001659	-	56560928	56561002	56560928	Intron	same
chr1	56574160	56574209	ZH38T0001660	-	56574187	56574188	56574187	Intron	same
chr1	56574534	56574596	ZH38T0001661	-	56574549	56574550	56574549	Intron	same
chr1	56578967	56578997	ZH38T0001662	+	56578981	56578982	56578981	Exon	opposite
chr1	56579009	56579182	ZH38T0001663	-	56579041	56579119	56579118	Proximal	same
chr1	56579517	56579580	ZH38T0001664	-	56579541	56579549	56579541	TSS	same
chr1	56579624	56579703	ZH38T0001665	-	56579643	56579672	56579670	Proximal	same
chr1	56645270	56645461	ZH38T0001666	+	56645315	56645375	56645368	TSS	same
chr1	56818817	56819042	ZH38T0001667	-	56818838	56818953	56818910	Proximal	same
chr1	56819289	56819477	ZH38T0001668	-	56819370	56819414	56819370	TSS	same
chr1	56819600	56819762	ZH38T0001669	-	56819662	56819735	56819702	Proximal	same
chr1	56836527	56836644	ZH38T0001670	+	56836565	56836601	56836596	Intergenic	opposite
chr1	56963843	56963984	ZH38T0001671	+	56963869	56963926	56963913	TSS	same
chr1	56965883	56966163	ZH38T0001672	-	56966000	56966034	56966014	TSS	same
chr1	56967500	56967623	ZH38T0001673	+	56967511	56967566	56967548	Intron	same
chr1	57090192	57090224	ZH38T0001674	+	57090206	57090207	57090206	Intron	opposite
chr1	57291036	57291086	ZH38T0001675	-	57291064	57291065	57291064	TSS	same
chr1	57309754	57309865	ZH38T0001676	-	57309786	57309824	57309786	Intron	same
chr1	57423984	57424093	ZH38T0001677	-	57424020	57424049	57424037	TSS	same
chr1	57424214	57424359	ZH38T0001678	-	57424223	57424326	57424271	Proximal	same
chr1	57725376	57725511	ZH38T0001679	-	57725450	57725484	57725451	Intergenic	same
chr1	57860525	57860651	ZH38T0001680	+	57860580	57860612	57860593	TSS	same
chr1	58056488	58056520	ZH38T0001681	-	58056504	58056505	58056504	Proximal	same
chr1	58250331	58250628	ZH38T0001682	-	58250412	58250550	58250536	Intergenic	same
chr1	58546691	58546860	ZH38T0001683	-	58546713	58546797	58546741	TSS	same
chr1	58576134	58576226	ZH38T0001684	+	58576158	58576216	58576165	Exon	opposite
chr1	58699977	58700167	ZH38T0001685	-	58700060	58700090	58700067	TSS	same
chr1	58782882	58783136	ZH38T0001686	-	58782932	58783088	58783087	Exon	same
chr1	58783389	58783609	ZH38T0001687	-	58783441	58783559	58783555	Exon	same
chr1	58783963	58784100	ZH38T0001688	-	58784021	58784049	58784042	Proximal	same
chr1	58784344	58784410	ZH38T0001689	+	58784379	58784386	58784383	Proximal	opposite
chr1	58785118	58785206	ZH38T0001690	+	58785129	58785169	58785154	TSS	same
chr1	59056592	59056725	ZH38T0001691	+	59056639	59056704	59056642	TSS	same
chr1	59146790	59146873	ZH38T0001692	-	59146811	59146847	59146833	TSS	same
chr1	59296448	59296590	ZH38T0001693	-	59296469	59296552	59296532	TSS	same
chr1	59296766	59296868	ZH38T0001694	+	59296789	59296833	59296832	Proximal	same
chr1	59296972	59297120	ZH38T0001695	+	59297065	59297103	59297093	TSS	same
chr1	59427277	59427427	ZH38T0001696	+	59427332	59427414	59427332	Intron	same
chr1	59473061	59473092	ZH38T0001697	+	59473075	59473076	59473075	Intron	same
chr1	59515577	59515679	ZH38T0001698	+	59515627	59515654	59515653	Intron	same
chr1	59673773	59673803	ZH38T0001699	+	59673787	59673788	59673787	Intron	same
chr1	59673973	59674121	ZH38T0001700	+	59674010	59674082	59674073	Exon	same
chr1	59814718	59814819	ZH38T0001701	+	59814743	59814791	59814785	Proximal	same
chr1	59814904	59815058	ZH38T0001702	+	59814935	59814982	59814953	TSS	same
chr1	59926674	59926862	ZH38T0001703	-	59926769	59926812	59926772	TSS	same
chr1	60008814	60008915	ZH38T0001704	-	60008831	60008877	60008855	Intron	same
chr1	60069926	60070017	ZH38T0001705	+	60069944	60069951	60069944	Intron	opposite
chr1	60073702	60073892	ZH38T0001706	-	60073746	60073770	60073769	TSS	same
chr1	60114827	60114947	ZH38T0001707	+	60114854	60114900	60114854	Intergenic	same
chr1	60825649	60825713	ZH38T0001708	-	60825662	60825686	60825662	Intron	same
chr1	60865135	60865224	ZH38T0001709	+	60865156	60865213	60865192	Proximal	same
chr1	60865262	60865404	ZH38T0001710	+	60865317	60865366	60865318	Proximal	same
chr1	60867939	60868053	ZH38T0001711	-	60867962	60868011	60867962	TSS	same
chr1	60949395	60949541	ZH38T0001712	-	60949433	60949467	60949443	Intron	same
chr1	60970664	60970767	ZH38T0001713	-	60970693	60970740	60970693	TSS	same
chr1	61057897	61057931	ZH38T0001714	-	61057913	61057914	61057913	Intron	opposite
chr1	61077186	61077406	ZH38T0001715	+	61077223	61077386	61077223	TSS	same
chr1	61081693	61081801	ZH38T0001716	+	61081717	61081769	61081755	Proximal	same
chr1	61082391	61082769	ZH38T0001717	+	61082422	61082621	61082422	TSS	same
chr1	61230682	61230774	ZH38T0001718	-	61230701	61230731	61230730	Intron	opposite
chr1	61253472	61253562	ZH38T0001719	-	61253484	61253512	61253496	TSS	same
chr1	61404071	61404257	ZH38T0001720	+	61404112	61404182	61404160	TSS	same
chr1	61457247	61457626	ZH38T0001721	+	61457381	61457600	61457583	Exon	same
chr1	61457636	61457740	ZH38T0001722	+	61457654	61457726	61457668	Exon	same
chr1	61725013	61725191	ZH38T0001723	-	61725129	61725144	61725143	TSS	same
chr1	61742363	61742555	ZH38T0001724	+	61742429	61742505	61742490	TSS	same
chr1	61864498	61864558	ZH38T0001725	+	61864510	61864547	61864510	Exon	same
chr1	61944272	61944401	ZH38T0001726	+	61944325	61944388	61944325	Intron	same
chr1	61951715	61951832	ZH38T0001727	+	61951786	61951809	61951802	Proximal	same
chr1	61951870	61952160	ZH38T0001728	+	61951891	61952070	61952052	TSS	same
chr1	61952237	61952466	ZH38T0001729	+	61952299	61952358	61952299	TSS	same
chr1	62194738	62194928	ZH38T0001730	+	62194808	62194870	62194869	TSS	same
chr1	62436239	62436310	ZH38T0001731	-	62436256	62436269	62436257	TSS	opposite
chr1	62436291	62436364	ZH38T0001732	+	62436300	62436348	62436347	TSS	same
chr1	62436963	62437138	ZH38T0001733	+	62437023	62437088	62437030	TSS	same
chr1	62597451	62598069	ZH38T0001734	+	62597515	62597520	62597519	TSS	same
chr1	62688254	62688320	ZH38T0001735	-	62688280	62688303	62688293	TSS	same
chr1	62688462	62688556	ZH38T0001736	+	62688499	62688533	62688509	TSS	same
chr1	62784082	62784194	ZH38T0001737	+	62784136	62784170	62784136	TSS	same
chr1	63012365	63012501	ZH38T0001738	-	63012376	63012459	63012458	Exon	same
chr1	63261764	63261854	ZH38T0001739	-	63261781	63261817	63261781	Proximal	opposite
chr1	63317104	63317317	ZH38T0001740	-	63317221	63317281	63317221	TSS	same
chr1	63321579	63321704	ZH38T0001741	-	63321616	63321666	63321634	Intron	same
chr1	63322134	63322197	ZH38T0001742	-	63322156	63322175	63322174	Proximal	same
chr1	63322391	63322520	ZH38T0001743	-	63322440	63322468	63322446	TSS	same
chr1	63323717	63323786	ZH38T0001744	-	63323741	63323761	63323757	Exon	opposite
chr1	63367591	63367702	ZH38T0001745	+	63367634	63367668	63367651	TSS	same
chr1	63523147	63523279	ZH38T0001746	-	63523193	63523225	63523205	TSS	same
chr1	63523267	63523428	ZH38T0001747	+	63523293	63523382	63523363	Proximal	same
chr1	63523471	63523608	ZH38T0001748	+	63523514	63523569	63523514	TSS	same
chr1	63547918	63548073	ZH38T0001749	+	63547937	63548037	63547937	Exon	same
chr1	63593146	63593210	ZH38T0001750	+	63593153	63593196	63593195	Proximal	same
chr1	63593211	63593500	ZH38T0001751	+	63593371	63593447	63593410	TSS	same
chr1	63623186	63623455	ZH38T0001752	+	63623251	63623389	63623345	Proximal	same
chr1	63773964	63774129	ZH38T0001753	+	63774016	63774074	63774025	TSS	same
chr1	63898448	63898522	ZH38T0001754	+	63898500	63898504	63898503	Intron	same
chr1	64171223	64171319	ZH38T0001755	-	64171272	64171299	64171298	TSS	same
chr1	64171321	64171384	ZH38T0001756	-	64171331	64171361	64171341	Proximal	same
chr1	64203572	64203687	ZH38T0001757	+	64203586	64203641	64203593	TSS	same
chr1	64470107	64470145	ZH38T0001758	+	64470128	64470129	64470128	TSS	same
chr1	64505858	64505999	ZH38T0001759	+	64505873	64505937	64505930	TSS	same
chr1	64866865	64867227	ZH38T0001760	-	64866939	64867195	64866963	Exon	same
chr1	65002420	65002501	ZH38T0001761	-	65002435	65002472	65002471	TSS	same
chr1	65058422	65058460	ZH38T0001762	-	65058440	65058441	65058440	Proximal	same
chr1	65066707	65066771	ZH38T0001763	-	65066722	65066758	65066722	Exon	same
chr1	65067682	65067779	ZH38T0001764	-	65067725	65067746	65067734	TSS	same
chr1	65147559	65147663	ZH38T0001765	+	65147588	65147622	65147608	Proximal	same
chr1	65147753	65147882	ZH38T0001766	+	65147765	65147827	65147809	TSS	same
chr1	65147913	65148050	ZH38T0001767	+	65147944	65148016	65147976	Proximal	same
chr1	65148076	65148230	ZH38T0001768	+	65148146	65148202	65148180	TSS	same
chr1	65148232	65148354	ZH38T0001769	+	65148277	65148299	65148277	Proximal	same
chr1	65148974	65149106	ZH38T0001770	+	65148990	65149053	65149023	Intron	same
chr1	65254468	65254603	ZH38T0001771	+	65254478	65254537	65254536	Intergenic	same
chr1	65264668	65264914	ZH38T0001772	+	65264731	65264860	65264776	TSS	same
chr1	65309497	65309602	ZH38T0001773	+	65309534	65309573	65309534	TSS	same
chr1	65310260	65310353	ZH38T0001774	+	65310288	65310315	65310307	Intron	same
chr1	65420531	65420737	ZH38T0001775	+	65420663	65420718	65420717	TSS	same
chr1	65481060	65481191	ZH38T0001776	-	65481101	65481144	65481101	Intron	opposite
chr1	65525484	65525800	ZH38T0001777	+	65525667	65525721	65525688	TSS	same
chr1	65792268	65792615	ZH38T0001778	+	65792319	65792538	65792407	TSS	same
chr1	65992391	65992463	ZH38T0001779	+	65992404	65992421	65992420	TSS	same
chr1	65992599	65992752	ZH38T0001780	+	65992627	65992735	65992734	Proximal	same
chr1	66332120	66332478	ZH38T0001781	+	66332189	66332441	66332244	Proximal	same
chr1	66354359	66354409	ZH38T0001782	+	66354386	66354394	66354386	TSS	same
chr1	66354508	66354672	ZH38T0001783	+	66354550	66354634	66354562	Proximal	same
chr1	66450025	66450193	ZH38T0001784	-	66450068	66450155	66450074	Intergenic	opposite
chr1	66533322	66533686	ZH38T0001785	+	66533585	66533652	66533589	TSS	same
chr1	66533824	66533883	ZH38T0001786	-	66533847	66533871	66533847	Proximal	opposite
chr1	66533901	66534213	ZH38T0001787	+	66534096	66534169	66534152	TSS	same
chr1	66564282	66564467	ZH38T0001788	-	66564317	66564373	66564363	Intron	opposite
chr1	66659832	66659937	ZH38T0001789	+	66659872	66659910	66659900	Intron	same
chr1	66752425	66752512	ZH38T0001790	+	66752458	66752487	66752465	TSS	same
chr1	66924738	66924877	ZH38T0001791	-	66924775	66924826	66924801	TSS	same
chr1	66924881	66925055	ZH38T0001792	+	66924967	66925008	66924989	TSS	same
chr1	66925168	66925245	ZH38T0001793	-	66925183	66925209	66925195	Proximal	same
chr1	66925234	66925376	ZH38T0001794	+	66925302	66925341	66925332	Proximal	same
chr1	66925442	66925573	ZH38T0001795	+	66925491	66925559	66925496	Intron	same
chr1	66930189	66930405	ZH38T0001796	+	66930240	66930276	66930253	TSS	same
chr1	66930914	66931022	ZH38T0001797	+	66930940	66930948	66930943	Intron	same
chr1	66946146	66946274	ZH38T0001798	+	66946159	66946215	66946196	Exon	same
chr1	67053913	67053992	ZH38T0001799	-	67053947	67053950	67053949	Proximal	same
chr1	67054062	67054188	ZH38T0001800	-	67054111	67054158	67054143	TSS	same
chr1	67134928	67135027	ZH38T0001801	-	67134958	67134994	67134958	Intron	same
chr1	67138946	67139035	ZH38T0001802	+	67138959	67139011	67139010	Proximal	same
chr1	67141642	67141798	ZH38T0001803	-	67141700	67141756	67141745	Intron	same
chr1	67141823	67141927	ZH38T0001804	-	67141844	67141895	67141844	Intron	same
chr1	67166386	67166490	ZH38T0001805	+	67166420	67166463	67166460	TSS	same
chr1	67207598	67207649	ZH38T0001806	+	67207615	67207616	67207615	TSS	same
chr1	67307836	67307963	ZH38T0001807	+	67307862	67307900	67307869	TSS	same
chr1	67429568	67429731	ZH38T0001808	-	67429607	67429688	67429673	Intron	same
chr1	67429979	67430484	ZH38T0001809	-	67430385	67430421	67430385	TSS	same
chr1	67514219	67514254	ZH38T0001810	+	67514235	67514236	67514235	Intergenic	same
chr1	67522226	67522390	ZH38T0001811	+	67522345	67522366	67522360	TSS	same
chr1	67685163	67685340	ZH38T0001812	+	67685176	67685218	67685200	TSS	same
chr1	67685353	67685425	ZH38T0001813	+	67685379	67685410	67685405	TSS	same
chr1	67717976	67718143	ZH38T0001814	-	67718027	67718056	67718039	Intron	same
chr1	67791688	67791811	ZH38T0001815	-	67791721	67791754	67791731	Intron	same
chr1	67792036	67792160	ZH38T0001816	-	67792079	67792142	67792105	Intron	same
chr1	67831881	67832130	ZH38T0001817	-	67831915	67831981	67831980	Proximal	opposite
chr1	67832196	67832248	ZH38T0001818	+	67832223	67832224	67832223	Proximal	same
chr1	67832254	67832408	ZH38T0001819	+	67832297	67832394	67832338	TSS	same
chr1	67833332	67833502	ZH38T0001820	-	67833399	67833459	67833430	TSS	same
chr1	68050565	68050775	ZH38T0001821	-	68050628	68050672	68050629	TSS	same
chr1	68051599	68051701	ZH38T0001822	-	68051631	68051684	68051631	TSS	same
chr1	68232411	68232597	ZH38T0001823	-	68232520	68232555	68232526	TSS	same
chr1	68384222	68384298	ZH38T0001824	-	68384253	68384258	68384253	Intergenic	same
chr1	68385458	68385490	ZH38T0001825	+	68385473	68385474	68385473	Intergenic	opposite
chr1	68386313	68386409	ZH38T0001826	+	68386330	68386333	68386332	Intergenic	opposite
chr1	68461093	68461136	ZH38T0001827	-	68461108	68461125	68461108	Intergenic	same
chr1	68496647	68496713	ZH38T0001828	+	68496672	68496696	68496695	TSS	same
chr1	68496943	68497280	ZH38T0001829	-	68497041	68497082	68497079	TSS	same
chr1	68881331	68881462	ZH38T0001830	+	68881341	68881430	68881419	Proximal	same
chr1	69551825	69551922	ZH38T0001831	+	69551877	69551901	69551877	TSS	same
chr1	69568277	69568355	ZH38T0001832	+	69568296	69568343	69568319	Proximal	same
chr1	69569194	69569397	ZH38T0001833	+	69569226	69569354	69569340	Intron	same
chr1	70205473	70205712	ZH38T0001834	-	70205557	70205592	70205578	TSS	same
chr1	70205645	70205774	ZH38T0001835	+	70205695	70205724	70205716	TSS	same
chr1	70221268	70221370	ZH38T0001836	-	70221279	70221344	70221322	Proximal	same
chr1	70221338	70221546	ZH38T0001837	+	70221382	70221485	70221472	Proximal	opposite
chr1	70235500	70235558	ZH38T0001838	+	70235520	70235533	70235531	Exon	same
chr1	70237411	70237560	ZH38T0001839	+	70237427	70237503	70237482	Exon	same
chr1	70244673	70244818	ZH38T0001840	+	70244715	70244806	70244774	Exon	same
chr1	70246823	70246915	ZH38T0001841	+	70246861	70246902	70246880	Exon	same
chr1	70247113	70247160	ZH38T0001842	+	70247125	70247147	70247146	Intron	same
chr1	70249921	70250059	ZH38T0001843	+	70249941	70250044	70249979	Exon	same
chr1	70354669	70354763	ZH38T0001844	-	70354717	70354729	70354722	TSS	same
chr1	70354770	70354883	ZH38T0001845	+	70354810	70354852	70354835	TSS	same
chr1	70360390	70360551	ZH38T0001846	-	70360413	70360491	70360436	TSS	same
chr1	70411201	70411328	ZH38T0001847	+	70411267	70411268	70411267	TSS	same
chr1	70947282	70947458	ZH38T0001848	+	70947317	70947396	70947349	TSS	same
chr1	70981424	70981460	ZH38T0001849	-	70981442	70981443	70981442	Intron	same
chr1	71080942	71081090	ZH38T0001850	-	71081020	71081035	71081028	TSS	same
chr1	71081326	71081422	ZH38T0001851	+	71081348	71081383	71081363	TSS	same
chr1	71404592	71404662	ZH38T0001852	-	71404639	71404646	71404645	Exon	same
chr1	72282320	72282599	ZH38T0001853	-	72282497	72282543	72282497	TSS	same
chr1	72282655	72282762	ZH38T0001854	-	72282670	72282709	72282670	Proximal	same
chr1	72282803	72282925	ZH38T0001855	-	72282818	72282877	72282819	Proximal	same
chr1	72282928	72283025	ZH38T0001856	-	72282938	72283003	72282971	Proximal	same
chr1	72282932	72282998	ZH38T0001857	+	72282948	72282976	72282972	Proximal	same
chr1	72283159	72283392	ZH38T0001858	+	72283251	72283361	72283346	TSS	same
chr1	72778057	72778114	ZH38T0001859	-	72778068	72778094	72778093	Intron	same
chr1	72899113	72899272	ZH38T0001860	-	72899142	72899212	72899153	TSS	same
chr1	73306137	73306225	ZH38T0001861	+	73306167	73306194	73306174	TSS	same
chr1	74198084	74198192	ZH38T0001862	-	74198149	74198176	74198149	TSS	same
chr1	74198196	74198395	ZH38T0001863	+	74198241	74198316	74198263	TSS	same
chr1	74235313	74235499	ZH38T0001864	+	74235383	74235409	74235386	TSS	same
chr1	74266196	74266305	ZH38T0001865	+	74266248	74266264	74266261	Intron	same
chr1	74465865	74465951	ZH38T0001866	+	74465896	74465931	74465930	Intron	same
chr1	74467989	74468253	ZH38T0001867	+	74468083	74468134	74468090	TSS	same
chr1	74578647	74578758	ZH38T0001868	-	74578694	74578743	74578729	Intron	same
chr1	74634818	74634933	ZH38T0001869	-	74634832	74634900	74634837	TSS	same
chr1	74673565	74673675	ZH38T0001870	-	74673601	74673649	74673648	Proximal	same
chr1	74714585	74714660	ZH38T0001871	-	74714604	74714634	74714633	Exon	same
chr1	74732951	74733105	ZH38T0001872	-	74733010	74733064	74733020	TSS	same
chr1	74733104	74733287	ZH38T0001873	+	74733161	74733223	74733204	TSS	same
chr1	75375854	75375968	ZH38T0001874	-	75375885	75375937	75375936	Intron	same
chr1	75376188	75376367	ZH38T0001875	-	75376210	75376324	75376315	Intron	same
chr1	75611047	75611145	ZH38T0001876	-	75611059	75611093	75611077	TSS	same
chr1	75614861	75615056	ZH38T0001877	+	75614941	75614985	75614943	Intergenic	opposite
chr1	75615869	75616098	ZH38T0001878	-	75615971	75616063	75616053	Intergenic	same
chr1	75616566	75616753	ZH38T0001879	-	75616611	75616669	75616629	Intergenic	same
chr1	75678089	75678212	ZH38T0001880	-	75678125	75678194	75678125	Intron	same
chr1	75724393	75724465	ZH38T0001881	+	75724416	75724450	75724421	Proximal	same
chr1	75724566	75724828	ZH38T0001882	+	75724708	75724765	75724760	TSS	same
chr1	75786187	75786589	ZH38T0001883	+	75786253	75786268	75786255	TSS	same
chr1	75787046	75787098	ZH38T0001884	+	75787070	75787071	75787070	TSS	same
chr1	75787869	75787936	ZH38T0001885	+	75787888	75787889	75787888	TSS	same
chr1	75796833	75796941	ZH38T0001886	+	75796878	75796907	75796894	TSS	same
chr1	76041126	76041246	ZH38T0001887	+	76041147	76041224	76041223	Intergenic	same
chr1	76041627	76041797	ZH38T0001888	+	76041642	76041734	76041722	Intergenic	same
chr1	76074673	76074862	ZH38T0001889	+	76074696	76074767	76074745	TSS	same
chr1	76094151	76094223	ZH38T0001890	+	76094183	76094202	76094191	Intron	same
chr1	76699738	76699772	ZH38T0001891	+	76699753	76699755	76699754	Proximal	same
chr1	76867415	76867541	ZH38T0001892	+	76867434	76867511	76867434	TSS	same
chr1	76995417	76995511	ZH38T0001893	+	76995459	76995497	76995491	Intron	same
chr1	77129057	77129100	ZH38T0001894	+	77129077	77129078	77129077	Proximal	same
chr1	77129231	77129321	ZH38T0001895	+	77129244	77129280	77129247	Proximal	same
chr1	77219378	77219468	ZH38T0001896	-	77219408	77219430	77219429	TSS	same
chr1	77219449	77219535	ZH38T0001897	+	77219475	77219520	77219519	Proximal	opposite
chr1	77227384	77227414	ZH38T0001898	+	77227398	77227399	77227398	Intergenic	opposite
chr1	77282021	77282098	ZH38T0001899	+	77282042	77282086	77282052	Proximal	same
chr1	77371270	77371315	ZH38T0001900	+	77371284	77371301	77371300	Intron	same
chr1	77532065	77532137	ZH38T0001901	+	77532082	77532107	77532106	TSS	same
chr1	77584998	77585128	ZH38T0001902	-	77585037	77585059	77585043	Intron	same
chr1	77605116	77605239	ZH38T0001903	-	77605127	77605201	77605181	Intron	same
chr1	77682626	77682698	ZH38T0001904	-	77682654	77682668	77682667	TSS	same
chr1	77683305	77683559	ZH38T0001905	-	77683370	77683437	77683397	TSS	same
chr1	77729919	77729951	ZH38T0001906	-	77729934	77729935	77729934	Exon	same
chr1	77759636	77759930	ZH38T0001907	-	77759810	77759873	77759851	TSS	same
chr1	77779607	77779721	ZH38T0001908	+	77779629	77779658	77779657	TSS	same
chr1	77888160	77888439	ZH38T0001909	+	77888218	77888419	77888387	Proximal	same
chr1	77888449	77888771	ZH38T0001910	+	77888599	77888639	77888620	TSS	same
chr1	77916044	77916140	ZH38T0001911	+	77916061	77916127	77916062	Exon	same
chr1	77917952	77918049	ZH38T0001912	+	77917982	77918034	77917995	Exon	same
chr1	77926406	77926625	ZH38T0001913	+	77926435	77926584	77926435	Exon	same
chr1	77926746	77926896	ZH38T0001914	+	77926812	77926851	77926831	Exon	same
chr1	77929283	77929517	ZH38T0001915	+	77929360	77929502	77929501	Exon	same
chr1	77933328	77933397	ZH38T0001916	+	77933340	77933363	77933362	Exon	same
chr1	77933409	77933485	ZH38T0001917	+	77933425	77933473	77933452	Exon	same
chr1	77935801	77936054	ZH38T0001918	+	77935853	77935992	77935853	Exon	same
chr1	77942016	77942217	ZH38T0001919	+	77942028	77942183	77942145	Exon	same
chr1	77965089	77965253	ZH38T0001920	-	77965100	77965220	77965166	Exon	same
chr1	77978327	77978423	ZH38T0001921	+	77978367	77978396	77978371	Intron	opposite
chr1	77979015	77979165	ZH38T0001922	-	77979072	77979114	77979109	TSS	same
chr1	77979134	77979328	ZH38T0001923	+	77979166	77979202	77979174	Proximal	opposite
chr1	77979400	77979557	ZH38T0001924	-	77979439	77979515	77979469	Proximal	same
chr1	77979437	77979580	ZH38T0001925	+	77979472	77979536	77979535	Proximal	opposite
chr1	78004534	78004573	ZH38T0001926	-	78004553	78004554	78004553	TSS	same
chr1	78004793	78004970	ZH38T0001927	+	78004861	78004945	78004934	TSS	same
chr1	78045936	78046114	ZH38T0001928	+	78046029	78046066	78046037	TSS	same
chr1	78046126	78046287	ZH38T0001929	+	78046145	78046220	78046153	Proximal	same
chr1	78143576	78143677	ZH38T0001930	-	78143599	78143645	78143632	Intergenic	same
chr1	78229582	78229685	ZH38T0001931	+	78229598	78229666	78229665	TSS	same
chr1	78293429	78293583	ZH38T0001932	+	78293478	78293511	78293500	Intron	same
chr1	78434339	78434464	ZH38T0001933	-	78434357	78434439	78434420	Intron	opposite
chr1	78473299	78473383	ZH38T0001934	+	78473312	78473363	78473312	Intron	same
chr1	78490922	78491162	ZH38T0001935	+	78490986	78491048	78490986	TSS	same
chr1	78620040	78620075	ZH38T0001936	+	78620056	78620058	78620056	Proximal	same
chr1	78620358	78620551	ZH38T0001937	+	78620430	78620492	78620469	TSS	same
chr1	78649766	78649908	ZH38T0001938	+	78649830	78649874	78649830	TSS	same
chr1	79006627	79006832	ZH38T0001939	-	79006685	79006733	79006704	TSS	same
chr1	79188410	79188497	ZH38T0001940	-	79188444	79188476	79188474	Intron	same
chr1	79698531	79698613	ZH38T0001941	+	79698544	79698600	79698587	Intergenic	same
chr1	80053001	80053066	ZH38T0001942	-	80053016	80053020	80053019	Intergenic	same
chr1	80535657	80535783	ZH38T0001943	+	80535720	80535744	80535720	TSS	same
chr1	80641241	80641356	ZH38T0001944	+	80641279	80641311	80641289	Intron	same
chr1	81178180	81178216	ZH38T0001945	-	81178198	81178199	81178198	Intergenic	opposite
chr1	81245598	81245864	ZH38T0001946	+	81245628	81245703	81245699	Intergenic	same
chr1	81306083	81306242	ZH38T0001947	+	81306109	81306207	81306157	TSS	same
chr1	81306278	81306348	ZH38T0001948	+	81306315	81306334	81306320	Proximal	same
chr1	81306359	81306447	ZH38T0001949	+	81306403	81306434	81306414	Proximal	same
chr1	81699408	81699492	ZH38T0001950	+	81699447	81699459	81699448	Proximal	same
chr1	81699579	81699783	ZH38T0001951	+	81699615	81699697	81699646	TSS	same
chr1	81800353	81800446	ZH38T0001952	+	81800375	81800378	81800375	TSS	same
chr1	81800517	81800646	ZH38T0001953	+	81800570	81800620	81800619	Proximal	same
chr1	81800956	81801017	ZH38T0001954	+	81800970	81800995	81800974	Intron	same
chr1	81801360	81801527	ZH38T0001955	+	81801441	81801463	81801460	Intron	same
chr1	81803121	81803331	ZH38T0001956	+	81803228	81803307	81803249	Intron	same
chr1	81836450	81836564	ZH38T0001957	+	81836501	81836535	81836532	Intron	same
chr1	82776315	82776399	ZH38T0001958	-	82776332	82776333	82776332	Intron	same
chr1	82848166	82848268	ZH38T0001959	-	82848211	82848243	82848211	TSS	same
chr1	83182210	83182437	ZH38T0001960	-	83182243	83182408	83182284	Intergenic	same
chr1	83182519	83182669	ZH38T0001961	-	83182553	83182659	83182553	Intergenic	same
chr1	83263972	83264059	ZH38T0001962	-	83263982	83264027	83264026	Intergenic	same
chr1	83516717	83516777	ZH38T0001963	+	83516731	83516735	83516734	Intergenic	same
chr1	83860489	83860623	ZH38T0001964	-	83860501	83860599	83860501	Proximal	same
chr1	83860902	83860957	ZH38T0001965	-	83860935	83860941	83860940	TSS	same
chr1	83860965	83861110	ZH38T0001966	-	83860994	83861038	83861037	TSS	same
chr1	83998943	83999225	ZH38T0001967	-	83999105	83999154	83999131	TSS	same
chr1	83999425	83999516	ZH38T0001968	+	83999450	83999489	83999467	Proximal	opposite
chr1	84077805	84077969	ZH38T0001969	-	84077855	84077931	84077905	TSS	same
chr1	84078018	84078292	ZH38T0001970	+	84078078	84078124	84078105	TSS	same
chr1	84144238	84144502	ZH38T0001971	+	84144270	84144334	84144327	TSS	same
chr1	84164148	84164433	ZH38T0001972	+	84164301	84164379	84164304	TSS	same
chr1	84164625	84164818	ZH38T0001973	+	84164678	84164702	84164693	TSS	same
chr1	84274934	84275015	ZH38T0001974	+	84274981	84274999	84274998	Intergenic	same
chr1	84297918	84298002	ZH38T0001975	-	84297935	84297943	84297935	Proximal	opposite
chr1	84298463	84298551	ZH38T0001976	+	84298478	84298508	84298482	Proximal	same
chr1	84299169	84299283	ZH38T0001977	-	84299227	84299256	84299250	Proximal	opposite
chr1	84299536	84299617	ZH38T0001978	+	84299558	84299602	84299558	TSS	same
chr1	84408209	84408509	ZH38T0001979	+	84408269	84408453	84408407	TSS	same
chr1	84479220	84479319	ZH38T0001980	+	84479258	84479270	84479269	TSS	same
chr1	84505338	84505445	ZH38T0001981	-	84505356	84505408	84505371	Intron	same
chr1	84506007	84506319	ZH38T0001982	-	84506131	84506183	84506169	Proximal	same
chr1	84506257	84506357	ZH38T0001983	+	84506291	84506345	84506344	Proximal	same
chr1	84506541	84506651	ZH38T0001984	-	84506560	84506583	84506578	TSS	same
chr1	84574091	84574142	ZH38T0001985	+	84574113	84574118	84574113	TSS	same
chr1	84574377	84574512	ZH38T0001986	-	84574417	84574475	84574446	TSS	same
chr1	84574518	84574637	ZH38T0001987	+	84574541	84574601	84574600	Proximal	same
chr1	84583277	84583373	ZH38T0001988	-	84583325	84583329	84583328	Exon	opposite
chr1	84690101	84690327	ZH38T0001989	-	84690180	84690294	84690292	TSS	same
chr1	84690376	84690488	ZH38T0001990	-	84690428	84690464	84690463	TSS	same
chr1	84690676	84690737	ZH38T0001991	+	84690687	84690706	84690705	Proximal	opposite
chr1	84797688	84797766	ZH38T0001992	-	84797702	84797744	84797724	Intergenic	opposite
chr1	84968863	84968999	ZH38T0001993	-	84968899	84968951	84968935	Intron	same
chr1	84997043	84997179	ZH38T0001994	-	84997073	84997119	84997112	TSS	same
chr1	84997163	84997243	ZH38T0001995	+	84997179	84997225	84997224	Proximal	opposite
chr1	85048014	85048119	ZH38T0001996	-	85048022	85048083	85048056	Proximal	same
chr1	85048388	85048573	ZH38T0001997	-	85048443	85048504	85048499	TSS	same
chr1	85062258	85062490	ZH38T0001998	+	85062337	85062351	85062347	TSS	same
[truncated: 50,548 more rows]

## Sheet: Table S1C
Supplemental Table S1C. Summary of peaks supporting RAMPAGE rPeak ZH38T0001231
Chrom	Start	End	Experiment	Strand	High density start	High density end	Summit	RPKM
chr1	39738808	39738929	ENCSR000AER	+	39738878	39738892	39738878	53.267	rPeak
chr1	39738815	39738911	ENCSR930RDW	+	39738878	39738892	39738878	20.5629
chr1	39738817	39738933	ENCSR612EAO	+	39738878	39738892	39738878	17.9454
chr1	39738820	39738912	ENCSR000AGR	+	39738878	39738892	39738878	15.8997
chr1	39738820	39738916	ENCSR833XGD	+	39738878	39738892	39738878	31.7146
chr1	39738820	39738919	ENCSR616JRI	+	39738878	39738892	39738878	17.5567
chr1	39738821	39738925	ENCSR000AEI	+	39738878	39738892	39738878	22.3142
chr1	39738822	39738926	ENCSR000AGP	+	39738878	39738892	39738878	16.2713
chr1	39738823	39738914	ENCSR786DTS	+	39738878	39738892	39738878	20.5448
chr1	39738823	39738917	ENCSR540YVD	+	39738878	39738892	39738878	37.7435
chr1	39738823	39738922	ENCSR824YLV	+	39738878	39738892	39738878	30.7009
chr1	39738824	39738914	ENCSR000AGX	+	39738878	39738892	39738878	16.6058
chr1	39738824	39738915	ENCSR022PAU	+	39738878	39738892	39738878	34.7326
chr1	39738826	39738914	ENCSR069LRO	+	39738878	39738892	39738878	18.2221
chr1	39738826	39738914	ENCSR792XFE	+	39738878	39738892	39738878	12.782
chr1	39738827	39738919	ENCSR000AGK	+	39738878	39738892	39738878	17.1203
chr1	39738828	39738912	ENCSR054RIR	+	39738878	39738892	39738878	29.6297
chr1	39738828	39738923	ENCSR970OWZ	+	39738878	39738892	39738878	13.1962
chr1	39738828	39738928	ENCSR100NLN	+	39738878	39738892	39738878	45.0886
chr1	39738828	39738936	ENCSR329YVA	+	39738878	39738892	39738878	11.3131
chr1	39738829	39738917	ENCSR000AGV	+	39738878	39738892	39738878	18.7466
chr1	39738829	39738921	ENCSR613JNT	+	39738878	39738892	39738878	18.9206
chr1	39738829	39738923	ENCSR007RIV	+	39738878	39738892	39738878	39.589
chr1	39738829	39738926	ENCSR855LXJ	+	39738878	39738892	39738878	39.4034
chr1	39738829	39738933	ENCSR855GRG	+	39738878	39738892	39738878	19.3048
chr1	39738829	39738934	ENCSR290RXI	+	39738878	39738892	39738878	31.8567
chr1	39738829	39738937	ENCSR000AGO	+	39738878	39738892	39738878	32.9067
chr1	39738830	39738911	ENCSR000AGS	+	39738878	39738892	39738878	11.5663
chr1	39738830	39738913	ENCSR848OYH	+	39738878	39738892	39738878	22.9748
chr1	39738830	39738913	ENCSR161GPD	+	39738878	39738892	39738878	17.2863
chr1	39738830	39738914	ENCSR093UPQ	+	39738878	39738892	39738878	19.3543
chr1	39738830	39738927	ENCSR506WDZ	+	39738878	39738892	39738878	28.6672
chr1	39738830	39738931	ENCSR852KOV	+	39738878	39738892	39738878	23.6861
chr1	39738831	39738913	ENCSR887SSW	+	39738878	39738892	39738878	20.8542
chr1	39738831	39738913	ENCSR000AGY	+	39738878	39738892	39738878	16.6274
chr1	39738831	39738916	ENCSR469ZUS	+	39738878	39738892	39738878	15.8521
chr1	39738831	39738916	ENCSR419VNG	+	39738878	39738892	39738878	14.3139
chr1	39738831	39738918	ENCSR239ZQA	+	39738878	39738892	39738878	25.4352
chr1	39738831	39738918	ENCSR000AGL	+	39738878	39738892	39738878	11.0519
chr1	39738831	39738929	ENCSR000AGJ	+	39738878	39738892	39738878	16.3826
chr1	39738831	39738949	ENCSR108KHH	+	39738878	39738892	39738878	39.818
chr1	39738832	39738916	ENCSR102OEK	+	39738878	39738892	39738878	18.077
chr1	39738834	39738910	ENCSR954YVZ	+	39738878	39738892	39738878	12.8367
chr1	39738834	39738916	ENCSR000AGN	+	39738878	39738892	39738878	15.1256
chr1	39738834	39738933	ENCSR598TAK	+	39738878	39738892	39738878	31.1107
chr1	39738834	39738933	ENCSR000AGW	+	39738878	39738892	39738878	13.9818
chr1	39738835	39738914	ENCSR285LDX	+	39738878	39738892	39738878	17.7987
chr1	39738835	39738924	ENCSR663WYF	+	39738878	39738892	39738878	23.8251
chr1	39738837	39738927	ENCSR949PHV	+	39738878	39738892	39738878	25.0976
chr1	39738838	39738927	ENCSR000AGQ	+	39738878	39738892	39738878	29.7699
chr1	39738839	39738912	ENCSR201ARN	+	39738878	39738892	39738878	8.39347
chr1	39738840	39738912	ENCSR611YXR	+	39738878	39738892	39738878	15.1558
chr1	39738840	39738913	ENCSR627SPU	+	39738878	39738892	39738878	16.7622
chr1	39738841	39738917	ENCSR632GYF	+	39738878	39738892	39738878	6.75856
chr1	39738842	39738918	ENCSR602PHV	+	39738878	39738892	39738878	19.6147
chr1	39738849	39738913	ENCSR502DKA	+	39738878	39738892	39738878	15.9766
chr1	39738849	39738929	ENCSR236PTD	+	39738878	39738892	39738878	14.5528
chr1	39738851	39738928	ENCSR501EGS	+	39738878	39738892	39738878	14.9592
chr1	39738852	39738913	ENCSR472PZH	+	39738878	39738892	39738878	13.4272
chr1	39738852	39738914	ENCSR028GEI	+	39738878	39738892	39738878	30.4271
chr1	39738852	39738920	ENCSR030CKH	+	39738878	39738892	39738878	17.0408
chr1	39738856	39738913	ENCSR199XGY	+	39738878	39738892	39738878	14.5991
chr1	39738856	39738939	ENCSR479BMI	+	39738878	39738892	39738878	25.0827
chr1	39738857	39738912	ENCSR785OGK	+	39738878	39738892	39738878	18.4443
chr1	39738858	39738919	ENCSR738HKC	+	39738878	39738892	39738878	13.1127
chr1	39738859	39738911	ENCSR176WZV	+	39738878	39738892	39738878	11.2058
chr1	39738859	39738918	ENCSR688YRV	+	39738878	39738892	39738878	3.96897
chr1	39738809	39738937	ENCSR866SRG	+	39738878	39738894	39738878	33.8644
chr1	39738817	39738929	ENCSR554TZR	+	39738878	39738894	39738878	13.5542
chr1	39738824	39738912	ENCSR883KJV	+	39738878	39738894	39738878	20.173
chr1	39738824	39738935	ENCSR841EQJ	+	39738878	39738894	39738878	30.9743
chr1	39738827	39738913	ENCSR366BLN	+	39738878	39738894	39738878	16.6734
chr1	39738828	39738939	ENCSR655HUL	+	39738878	39738894	39738878	27.8155
chr1	39738829	39738914	ENCSR582BUX	+	39738878	39738894	39738878	22.7022
chr1	39738831	39738915	ENCSR000AGM	+	39738878	39738894	39738878	13.0238
chr1	39738832	39738919	ENCSR779OWH	+	39738878	39738894	39738878	18.2741
chr1	39738833	39738913	ENCSR543DIO	+	39738878	39738894	39738878	12.4184
chr1	39738836	39738914	ENCSR941SAZ	+	39738878	39738894	39738878	10.4702
chr1	39738838	39738913	ENCSR669JBL	+	39738878	39738894	39738878	27.3218
chr1	39738841	39738913	ENCSR877SCS	+	39738878	39738894	39738878	11.7886
chr1	39738842	39738930	ENCSR706VZW	+	39738878	39738894	39738878	14.2629
chr1	39738846	39738914	ENCSR983ICQ	+	39738878	39738894	39738878	16.2591
chr1	39738848	39738913	ENCSR477JQM	+	39738878	39738894	39738878	25.3011
chr1	39738850	39738915	ENCSR679TCM	+	39738878	39738894	39738878	20.6661
chr1	39738851	39738915	ENCSR700YLA	+	39738878	39738894	39738878	18.2325
chr1	39738852	39738926	ENCSR743LXD	+	39738878	39738894	39738878	18.8824
chr1	39738855	39738913	ENCSR713KWE	+	39738878	39738894	39738878	6.55269
chr1	39738852	39738914	ENCSR480WCN	+	39738878	39738892	39738889	8.81476
chr1	39738830	39738913	ENCSR698NAQ	+	39738878	39738892	39738891	26.1308
chr1	39738830	39738915	ENCSR601URL	+	39738878	39738892	39738891	23.1336
chr1	39738830	39738925	ENCSR410OSB	+	39738878	39738892	39738891	24.9317
chr1	39738832	39738913	ENCSR000AGT	+	39738878	39738892	39738891	13.7649
chr1	39738833	39738935	ENCSR337VPD	+	39738878	39738892	39738891	22.5132
chr1	39738835	39738925	ENCSR219EAT	+	39738878	39738892	39738891	14.2003
chr1	39738838	39738911	ENCSR035MAJ	+	39738878	39738892	39738891	17.0379
chr1	39738838	39738917	ENCSR790PBX	+	39738878	39738892	39738891	16.4704
chr1	39738840	39738912	ENCSR000AGU	+	39738878	39738892	39738891	17.6096
chr1	39738841	39738939	ENCSR686VRS	+	39738878	39738892	39738891	21.7136
chr1	39738848	39738914	ENCSR000AHA	+	39738878	39738892	39738891	21.8704
chr1	39738849	39738926	ENCSR376IXU	+	39738878	39738892	39738891	24.6091
chr1	39738860	39738911	ENCSR497BYB	+	39738878	39738892	39738891	13.0029
chr1	39738822	39738923	ENCSR724SZY	+	39738878	39738894	39738891	19.252
chr1	39738827	39738912	ENCSR024MNP	+	39738878	39738894	39738891	18.8857
chr1	39738830	39738914	ENCSR649WDK	+	39738878	39738894	39738891	13.0511
chr1	39738830	39738932	ENCSR918MVG	+	39738878	39738894	39738891	12.8789
chr1	39738831	39738923	ENCSR419MZM	+	39738878	39738894	39738891	18.7874
chr1	39738833	39738914	ENCSR930XIH	+	39738878	39738894	39738891	18.8259
chr1	39738833	39738915	ENCSR321NPB	+	39738878	39738894	39738891	26.7242
chr1	39738836	39738912	ENCSR458JVO	+	39738878	39738894	39738891	9.78974
chr1	39738836	39738928	ENCSR226BLJ	+	39738878	39738894	39738891	10.4447
chr1	39738848	39738913	ENCSR000AGZ	+	39738878	39738894	39738891	21.0981
chr1	39738848	39738925	ENCSR454ZQB	+	39738878	39738894	39738891	20.2909
chr1	39738855	39738912	ENCSR464UVO	+	39738878	39738894	39738891	10.4012
chr1	39738827	39738912	ENCSR710LGT	+	39738878	39738894	39738893	14.2054
