# Supplementary material for: Integration of high-resolution promoter profiling assays reveals novel, cell type–specific transcription start sites across 115 human cell and tissue types
Source: HighWire-hosted journal article supplement (doi:10.1101/gr.275723.121), 2021-12-23
Supplement: Supplemental_Table_S2.xlsx [file Supplemental_Table_S2.xlsx]

## Sheet: Contents
Supplemental Table S2. Gene ontology enrichment for CAGE-only and RAMPAGE-only genes
Supplemental Table S2A	CAGE-only genes
Supplemental Table S2B	RAMPAGE-only genes
Supplemental Table S2C	GO enrichment for CAGE-only genes
Supplemental Table S2D	GO enrichment for RAMPAGE-only genes

## Sheet: Table S2A
Supplemental Table S2A. CAGE-only genes
Gene Name
A2ML1-AS1
A4GNT
AACS
AADACL3
AANAT
ABCA2
ABCA4
ABCB10
ABCC1
ABCC11
ABCF2P1
ABCG1
ABCG4
ABCG5
ABHD12
ABHD15
ABHD17A
ABHD3
ABL1
ABLIM2
AC000035.1
AC000065.1
AC000085.1
AC000124.1
AC002072.1
AC002075.2
AC002076.1
AC002094.3
AC002310.5
AC002351.1
AC002398.2
AC002401.1
AC002407.1
AC002429.2
AC002480.2
AC003043.2
AC003044.1
AC003072.1
AC003093.1
AC003101.1
AC003102.1
AC003112.1
AC003684.1
AC003975.1
AC003991.1
AC003991.2
AC004009.1
AC004223.3
AC004224.1
AC004264.1
AC004408.2
AC004448.2
AC004596.1
AC004690.2
AC004692.1
AC004704.1
AC004817.1
AC004817.3
AC004830.1
AC004832.3
AC004835.1
AC004837.1
AC004854.2
AC004869.1
AC004870.2
AC004890.1
AC004895.1
AC004910.1
AC004921.1
AC004921.2
AC004947.1
AC004988.1
AC005006.1
AC005011.1
AC005034.6
AC005037.1
AC005041.3
AC005041.4
AC005042.2
AC005050.2
AC005070.1
AC005081.1
AC005082.1
AC005099.1
AC005220.1
AC005229.2
AC005229.5
AC005244.1
AC005255.2
AC005291.2
AC005293.1
AC005300.1
AC005323.1
AC005329.3
AC005342.2
AC005355.1
AC005357.2
AC005379.1
AC005381.1
AC005400.1
AC005412.1
AC005476.2
AC005482.1
AC005523.1
AC005540.1
AC005550.2
AC005551.1
AC005580.1
AC005586.1
AC005587.1
AC005609.5
AC005703.1
AC005726.1
AC005726.2
AC005726.3
AC005746.1
AC005746.2
AC005759.1
AC005775.1
AC005822.1
AC005828.4
AC005829.1
AC005829.2
AC005837.3
AC005863.1
AC005865.2
AC005865.3
AC005871.2
AC005909.2
AC006007.1
AC006011.1
AC006028.1
AC006059.1
AC006059.3
AC006062.1
AC006077.1
AC006112.1
AC006157.1
AC006207.1
AC006254.1
AC006299.1
AC006333.1
AC006445.2
AC006449.1
AC006450.3
AC006478.1
AC006486.1
AC006530.1
AC006539.1
AC006927.4
AC006970.1
AC006978.1
AC007009.1
AC007038.2
AC007040.1
AC007066.3
AC007068.1
AC007099.1
AC007099.2
AC007100.1
AC007106.2
AC007128.1
AC007160.1
AC007161.1
AC007163.1
AC007207.1
AC007216.4
AC007238.1
AC007326.4
AC007349.2
AC007349.3
AC007376.2
AC007387.1
AC007387.3
AC007389.1
AC007390.1
AC007391.1
AC007391.3
AC007405.1
AC007406.2
AC007406.3
AC007406.5
AC007422.1
AC007448.3
AC007448.4
AC007450.1
AC007450.4
AC007485.2
AC007490.1
AC007493.1
AC007494.1
AC007495.1
AC007535.1
AC007546.3
AC007560.1
AC007608.1
AC007663.1
AC007681.1
AC007683.1
AC007686.1
AC007686.3
AC007728.2
AC007785.3
AC007786.1
AC007922.3
AC007922.4
AC007938.3
AC007952.4
AC007993.1
AC008011.2
AC008026.1
AC008050.1
AC008055.1
AC008060.1
AC008063.1
AC008063.2
AC008073.2
AC008074.2
AC008105.1
AC008105.3
AC008149.2
AC008155.1
AC008163.1
AC008164.1
AC008243.1
AC008273.1
AC008278.2
AC008406.1
AC008438.2
AC008453.2
AC008459.1
AC008481.1
AC008481.3
AC008505.1
AC008514.1
AC008521.1
AC008550.1
AC008554.2
AC008568.1
AC008571.2
AC008574.1
AC008592.1
AC008592.4
AC008610.1
AC008655.2
AC008659.1
AC008670.1
AC008676.3
AC008687.5
AC008687.6
AC008687.7
AC008694.1
AC008696.2
AC008708.1
AC008708.2
AC008728.1
AC008753.1
AC008760.1
AC008763.3
AC008764.1
AC008764.7
AC008780.1
AC008802.1
AC008878.1
AC008892.1
AC008894.2
AC008894.3
AC008938.1
AC008966.3
AC008982.1
AC009039.1
AC009041.1
AC009053.3
AC009061.1
AC009063.2
AC009063.3
AC009075.2
AC009078.1
AC009093.1
AC009093.4
AC009107.1
AC009121.2
AC009123.1
AC009126.1
AC009133.5
AC009139.1
AC009145.1
AC009166.1
AC009171.1
AC009171.2
AC009236.2
AC009292.2
AC009299.2
AC009318.1
AC009362.1
AC009412.1
AC009435.1
AC009474.2
AC009480.2
AC009486.2
AC009487.3
AC009502.1
AC009506.2
AC009518.1
AC009522.1
AC009542.2
AC009562.1
AC009630.4
AC009690.2
AC009690.3
AC009704.3
AC009716.2
AC009802.1
AC009812.1
AC009869.1
AC010086.3
AC010099.1
AC010183.1
AC010198.1
AC010200.1
AC010203.1
AC010226.1
AC010240.1
AC010280.1
AC010280.2
AC010285.3
AC010319.1
AC010319.2
AC010328.1
AC010330.1
AC010333.3
AC010342.1
AC010385.1
AC010468.1
AC010478.1
AC010501.1
AC010542.3
AC010601.1
AC010605.1
AC010618.2
AC010623.1
AC010624.5
AC010677.1
AC010729.1
AC010733.2
AC010745.2
AC010754.1
AC010864.1
AC010883.3
AC010894.1
AC010894.2
AC010913.1
AC010931.2
AC010976.1
AC010991.1
AC010997.2
AC010997.3
AC011037.1
AC011228.1
AC011239.2
AC011257.1
AC011317.1
AC011389.1
AC011416.4
AC011444.2
AC011444.3
AC011445.1
AC011446.2
AC011447.1
AC011462.5
AC011468.3
AC011472.2
AC011474.1
AC011474.2
AC011477.6
AC011481.3
AC011483.1
AC011484.1
AC011491.3
AC011495.3
AC011498.1
AC011500.1
AC011511.2
AC011518.1
AC011595.2
AC011611.3
AC011726.1
AC011773.4
AC011840.5
AC011921.3
AC011933.3
AC011990.1
AC011995.2
AC012081.1
AC012150.1
AC012178.1
AC012181.2
AC012182.1
AC012184.3
AC012254.4
AC012307.1
AC012313.6
AC012321.1
AC012349.1
AC012354.2
AC012363.1
AC012378.2
AC012405.1
AC012435.1
AC012462.3
AC012464.1
AC012485.3
AC012494.1
AC012498.2
AC012507.2
AC012508.1
AC012508.2
AC012508.3
AC012568.1
AC012574.1
AC012613.1
AC012613.2
AC012618.1
AC012640.4
AC012668.1
AC012668.3
AC013271.1
AC013356.1
AC013394.1
AC013399.1
AC013404.1
AC013457.1
AC013470.2
AC013480.1
AC015689.1
AC015720.1
AC015722.1
AC015802.6
AC015813.3
AC015813.5
AC015871.5
AC015908.1
AC015921.1
AC015936.1
AC015961.2
AC015977.1
AC016292.1
AC016405.3
AC016526.4
AC016576.1
AC016582.2
AC016590.1
AC016590.4
AC016596.1
AC016601.1
AC016682.1
AC016687.1
AC016687.2
AC016700.1
AC016705.1
AC016716.1
AC016739.1
AC016769.2
AC016866.1
AC016868.1
AC016930.1
AC016956.1
AC016999.1
AC017002.3
AC017002.6
AC017007.3
AC017033.1
AC017053.1
AC018358.1
AC018371.2
AC018398.1
AC018450.1
AC018463.1
AC018511.5
AC018512.1
AC018521.1
AC018523.1
AC018529.1
AC018529.2
AC018553.2
AC018563.1
AC018628.1
AC018634.1
AC018683.1
AC018685.2
AC018695.1
AC018714.2
AC018754.1
AC018755.1
AC018755.3
AC018761.3
AC018781.1
AC018816.2
AC018868.1
AC018880.2
AC018904.2
AC019084.1
AC019117.1
AC019117.3
AC019131.1
AC019163.1
AC019171.1
AC019178.1
AC019257.1
AC019294.2
AC020551.1
AC020613.1
AC020636.1
AC020651.2
AC020656.1
AC020656.2
AC020663.4
AC020763.3
AC020898.1
AC020904.2
AC020905.1
AC020907.3
AC020907.5
AC020910.4
AC020916.1
AC020922.2
AC020928.2
AC020934.1
AC020978.4
AC020978.7
AC020983.1
AC021006.1
AC021016.1
AC021054.1
AC021055.1
AC021072.1
AC021074.1
AC021074.3
AC021146.12
AC021180.1
AC021218.1
AC021231.2
AC021351.1
AC021393.1
AC021491.3
AC021613.1
AC021660.3
AC021683.3
AC021698.1
AC021915.1
AC022098.3
AC022126.1
AC022133.1
AC022149.1
AC022167.3
AC022182.1
AC022182.2
AC022201.2
AC022217.2
AC022239.1
AC022367.1
AC022400.9
AC022415.1
AC022424.1
AC022467.2
AC022509.1
AC022509.3
AC022523.1
AC022601.1
AC022679.1
AC022730.2
AC022730.4
AC022733.1
AC022733.2
AC022868.1
AC022868.2
AC022872.1
AC022898.1
AC022916.2
AC023137.1
AC023157.1
AC023232.1
AC023300.2
AC023347.1
AC023355.1
AC023385.1
AC023469.2
AC023512.1
AC023590.1
AC023787.2
AC023796.1
AC023824.3
AC023886.2
AC023905.1
AC023906.1
AC024028.1
AC024084.1
AC024337.1
AC024451.3
AC024587.2
AC024901.1
AC024933.2
AC024940.1
AC024940.5
AC025040.2
AC025048.7
AC025154.2
AC025171.3
AC025171.5
AC025180.1
AC025181.1
AC025198.1
AC025257.1
AC025278.1
AC025279.1
AC025280.2
AC025419.1
AC025437.1
AC025437.4
AC025437.5
AC025449.2
AC025458.1
AC025518.1
AC025539.1
AC025750.1
AC025810.1
AC025822.2
AC025857.1
AC025884.2
AC026310.1
AC026310.3
AC026316.5
AC026336.2
AC026341.1
AC026415.1
AC026462.1
AC026462.3
AC026470.1
AC026470.3
AC026470.4
AC026471.3
AC026688.2
AC026691.1
AC026700.1
AC026726.1
AC026748.1
AC026748.3
AC026785.1
AC026803.2
AC026877.1
AC026904.3
AC026954.3
AC027013.1
AC027088.5
AC027176.2
AC027251.1
AC027279.1
AC027290.2
AC027307.1
AC027601.1
AC027601.6
AC027644.1
AC027682.4
AC027763.1
AC034102.6
AC034199.1
AC034206.1
AC034213.1
AC034228.4
AC034236.1
AC036222.1
AC037193.1
AC037441.1
AC037450.1
AC037459.4
AC037486.1
AC044784.1
AC044787.1
AC044810.3
AC044893.1
AC046168.2
AC046185.3
AC048341.1
AC055717.2
AC055733.2
AC055788.2
AC060765.1
AC060765.2
AC060766.3
AC060834.1
AC060834.2
AC061708.1
AC062015.1
AC062028.1
AC063977.2
AC063980.1
AC064801.1
AC064805.1
AC064805.2
AC064847.1
AC066616.2
AC067751.1
AC067852.1
AC067945.1
AC067945.3
AC067956.1
AC067969.1
AC068025.1
AC068075.2
AC068134.1
AC068134.2
AC068137.1
AC068205.1
AC068234.1
AC068279.2
AC068308.1
AC068389.1
AC068413.1
AC068489.1
AC068512.1
AC068580.2
AC068580.3
AC068594.1
AC068631.3
AC068643.1
AC068647.2
AC068790.6
AC068790.7
AC068875.1
AC068898.1
AC068898.2
AC068985.1
AC069029.1
AC069155.1
AC069209.1
AC069214.1
AC069218.1
AC069228.1
AC069234.1
AC069368.2
AC072022.2
AC073050.1
AC073091.3
AC073114.1
AC073140.1
AC073172.1
AC073283.2
AC073352.2
AC073367.1
AC073370.1
AC073534.1
AC073578.1
AC073578.5
AC073585.1
AC073585.2
AC073592.1
AC073594.1
AC073611.1
AC073834.1
AC073857.1
AC073911.1
AC073934.1
AC074024.1
AC074051.4
AC074133.1
AC074183.1
AC074183.2
AC074237.1
AC074286.1
AC076966.1
AC076968.1
AC078814.2
AC078865.1
AC078880.4
AC078881.1
AC078882.1
AC078883.1
AC078905.1
AC078909.1
AC078916.1
AC078929.1
AC078942.1
AC078950.1
AC078991.1
AC079031.1
AC079296.1
AC079313.1
AC079328.1
AC079336.2
AC079341.1
AC079352.1
AC079362.1
AC079466.1
AC079587.1
AC079610.1
AC079630.1
AC079753.1
AC079760.2
AC079768.1
AC079768.3
AC079768.4
AC079780.1
AC079781.4
AC079781.5
AC079793.1
AC079801.1
AC079848.1
AC079922.1
AC079944.1
AC079944.2
AC079949.4
AC080014.1
AC080023.1
AC080038.2
AC080079.2
AC080129.1
AC080132.1
AC082651.1
AC083841.1
AC083875.1
AC084018.2
AC084030.1
AC084117.1
AC084121.3
AC084262.2
AC084740.1
AC084816.1
AC084824.1
AC084859.1
AC084866.2
AC084871.1
AC084871.3
AC084876.2
AC084879.1
AC087164.1
AC087260.1
AC087269.1
AC087286.3
AC087289.3
AC087385.2
AC087457.1
AC087482.1
AC087516.2
AC087521.3
AC087564.1
AC087591.1
AC087612.1
AC087623.2
AC087636.1
AC087639.2
AC087645.3
AC087762.1
AC087763.1
AC087783.1
AC087854.2
AC087878.1
AC087884.1
AC090058.1
AC090109.1
AC090114.1
AC090114.2
AC090197.1
AC090200.1
AC090227.1
AC090236.1
AC090337.2
AC090415.2
AC090515.1
AC090515.6
AC090559.1
AC090559.2
AC090572.3
AC090578.3
AC090589.3
AC090679.1
AC090686.1
AC090692.2
AC090735.1
AC090819.1
AC090826.1
AC090877.2
AC090948.2
AC091117.2
AC091133.5
AC091138.1
AC091152.1
AC091153.1
AC091167.1
AC091167.6
AC091179.1
AC091180.2
AC091182.1
AC091212.1
AC091429.1
AC091534.1
AC091564.6
AC091564.7
AC091614.1
AC091646.1
AC091675.1
AC091729.3
AC091805.1
AC091832.1
AC091849.2
AC091885.2
AC091982.2
AC092017.2
AC092047.1
AC092053.2
AC092053.4
AC092058.1
AC092069.1
AC092073.1
AC092079.2
AC092100.1
AC092106.1
AC092112.1
AC092115.1
AC092119.3
AC092127.2
AC092135.1
AC092143.1
AC092145.1
AC092162.2
AC092171.5
AC092183.1
AC092198.1
AC092268.1
AC092295.2
AC092327.1
AC092327.2
AC092343.1
AC092353.1
AC092384.2
AC092447.1
AC092506.1
AC092552.1
AC092574.2
AC092640.1
AC092646.2
AC092647.1
AC092651.2
AC092656.1
AC092674.1
AC092675.1
AC092718.6
AC092720.2
AC092723.4
AC092745.2
AC092754.1
AC092755.2
AC092803.1
AC092803.5
AC092807.1
AC092810.1
AC092810.3
AC092819.3
AC092849.1
AC092849.2
AC092868.1
AC092896.1
AC092924.2
AC092939.1
AC092966.1
AC093010.3
AC093019.2
AC093107.1
AC093107.2
AC093151.6
AC093214.1
AC093270.1
AC093270.2
AC093277.1
AC093326.2
AC093330.3
AC093422.2
AC093462.1
AC093495.1
AC093503.1
AC093503.3
AC093512.1
AC093523.1
AC093525.8
AC093535.2
AC093567.1
AC093579.1
AC093583.1
AC093599.2
AC093627.1
AC093627.3
AC093765.2
AC093765.4
AC093770.1
AC093772.2
AC093787.1
AC093789.1
AC093809.1
AC093849.4
AC093865.1
AC093895.1
AC095059.2
AC096577.1
AC096589.1
AC096645.1
AC096649.2
AC096664.2
AC096667.1
AC096733.2
AC096746.1
AC096759.1
AC096887.2
AC096888.1
AC097065.1
AC097358.1
AC097381.2
AC097450.1
AC097467.3
AC097468.1
AC097480.1
AC097518.2
AC097532.2
AC097634.4
AC097638.1
AC097639.1
AC097713.1
AC097724.1
AC098582.1
AC098583.1
AC098588.2
AC098591.1
AC098679.6
AC098818.2
AC098847.1
AC098859.1
AC098934.3
AC098935.1
AC098935.2
AC099050.1
AC099063.4
AC099329.1
AC099335.1
AC099336.2
AC099344.1
AC099344.3
AC099513.1
AC099521.3
AC099548.1
AC099552.1
AC099552.3
AC099552.5
AC099560.1
AC099661.1
AC099684.2
AC099687.1
AC099786.1
AC099786.2
AC099795.1
AC099811.3
AC100757.1
AC100757.2
AC100791.2
AC100802.1
AC100803.1
AC100805.1
AC100810.3
AC100834.1
AC100835.1
AC100843.2
AC100858.3
AC102953.1
AC103563.1
AC103563.9
AC103564.1
AC103702.1
AC103705.1
AC103718.1
AC103724.2
AC103724.3
AC103724.4
AC103740.2
AC103770.1
AC103778.1
AC103808.1
AC103808.3
AC103810.3
AC103833.2
AC103855.2
AC103874.1
AC103974.1
AC103988.1
AC104024.2
AC104035.1
AC104046.1
AC104066.3
AC104078.2
AC104109.2
AC104134.1
AC104167.1
AC104212.1
AC104212.2
AC104232.1
AC104333.4
AC104383.2
AC104389.1
AC104389.3
AC104389.6
AC104407.1
AC104423.1
AC104435.1
AC104450.1
AC104457.2
AC104506.1
AC104532.1
AC104563.1
AC104564.3
AC104576.1
AC104581.2
AC104655.1
AC104695.1
AC104695.3
AC104695.4
AC104771.1
AC104793.1
AC104806.1
AC104809.1
AC104823.1
AC104849.1
AC105020.6
AC105052.2
AC105094.2
AC105105.1
AC105114.2
AC105177.1
AC105250.1
AC105328.1
AC105339.4
AC105399.1
AC105918.1
AC105941.1
AC105942.1
AC106028.2
AC106028.4
AC106736.1
AC106738.2
AC106739.1
AC106782.5
AC106795.1
AC106800.1
AC106818.1
AC106820.2
AC106845.2
AC106864.1
AC106865.2
AC106872.3
AC106874.1
AC106881.1
AC106882.1
AC107021.2
AC107027.1
AC107204.1
AC107214.1
AC107220.1
AC107222.2
AC107373.2
AC107398.4
AC107890.1
AC107959.3
AC107973.1
AC107993.1
AC108052.1
AC108067.1
AC108073.2
AC108097.1
AC108134.4
AC108142.1
AC108145.1
AC108161.1
AC108210.2
AC108448.1
AC108448.3
AC108449.2
AC108472.1
AC108482.2
AC108673.3
AC108690.1
AC108693.2
AC108704.2
AC108721.2
AC108749.1
AC108751.5
AC108865.2
AC108868.2
AC109439.1
AC109439.2
AC109472.1
AC109597.2
AC109635.8
AC110285.1
AC110285.3
AC110285.4
AC110285.5
AC110285.6
AC110373.1
AC110491.2
AC110491.3
AC110716.1
AC110741.1
AC110749.1
AC110801.1
AC110809.1
AC110998.1
AC111000.1
AC111000.4
AC111149.2
AC111152.3
AC111170.3
AC111193.1
AC111200.1
AC112191.2
AC112204.2
AC112236.2
AC112236.3
AC112482.2
AC112487.2
AC112492.5
AC112656.1
AC112721.1
AC112777.1
AC113189.4
AC113192.4
AC113367.1
AC113367.3
AC113398.1
AC113404.3
AC113608.1
AC114291.2
AC114341.2
AC114482.1
AC114485.1
AC114730.1
AC114730.3
AC114744.1
AC114752.2
AC114755.3
AC114801.3
AC114930.1
AC114971.1
AC114977.1
AC114977.2
AC115220.1
AC115485.1
AC115837.1
AC116025.1
AC116035.1
AC116049.1
AC116158.3
AC116317.1
AC116337.1
AC116337.2
AC116345.3
AC116351.2
AC116353.5
AC116366.1
AC116407.1
AC116424.1
AC116456.1
AC116535.1
AC116917.1
AC117386.2
AC117473.1
AC117488.1
AC118344.2
AC118465.1
AC118754.1
AC119428.2
AC119673.2
AC119868.2
AC120049.1
AC120057.3
AC120057.4
AC120349.2
AC120498.1
AC120498.2
AC120498.4
AC120498.9
AC121161.2
AC121338.2
AC121757.1
AC121764.1
AC121764.2
AC122138.1
AC122718.1
AC123512.1
AC123595.2
AC123912.2
AC124066.1
AC124067.2
AC124067.4
AC124069.1
AC124290.1
AC124784.1
AC124798.2
AC124861.1
AC124944.2
AC125232.2
AC125616.1
AC126177.5
AC126283.1
AC126696.2
AC126773.2
AC127024.1
AC127029.3
AC127070.3
AC127496.1
AC127502.1
AC127521.1
AC128709.3
AC129102.1
AC129492.6
AC129492.8
AC129507.2
AC129926.1
AC130343.2
AC130456.8
AC130689.1
AC131011.1
AC131097.3
AC131235.1
AC131254.1
AC132825.1
AC132825.6
AC132825.8
AC132872.2
AC132938.3
AC133435.1
AC133473.1
AC133550.2
AC133637.2
AC133961.1
AC134669.1
AC135178.3
AC135279.3
AC135586.2
AC136428.1
AC136475.7
AC136628.2
AC136628.4
AC136759.1
AC137494.1
AC137800.1
AC138057.1
AC138123.1
AC138150.2
AC138207.3
AC138207.9
AC138356.1
AC138466.1
AC138625.2
AC138647.1
AC139143.1
AC139491.3
AC139768.1
AC139795.1
AC140481.1
AC140847.2
AC144450.1
AC144548.1
AC144573.1
AC144652.1
AC145207.1
AC145207.5
AC145285.6
AC145343.1
AC148477.3
AC148477.4
AC207130.1
AC209005.1
AC211486.4
AC233280.19
AC233300.1
AC233723.1
AC233964.1
AC234582.1
AC234772.2
AC234775.4
AC239600.1
AC239800.2
AC239809.2
AC243571.2
AC243829.1
AC243829.2
AC243829.4
AC244033.1
AC244034.1
AC244090.2
AC244205.1
AC244258.1
AC244394.1
AC244636.3
AC245052.2
AC245060.5
AC245088.1
AC245128.3
AC245140.3
AC245187.2
AC245369.1
ACAA1
ACAP3
ACBD3
ACKR4
ACOD1
ACOT1
ACSL6
ACSS1
ACTBP11
ACTBP2
ACTBP7
ACTBP8
ACTBP9
ACTG1P11
ACTG1P14
ACTG1P19
ACTG1P20
ACTG1P21
ACTG1P22
ACTN1-AS1
ACTN4P1
ACTR3C
ACTR5
ACVR2A
ACVR2B
ACVR2B-AS1
AD000090.1
AD000864.1
ADAM12
ADAM20
ADAM21
ADAM22
ADAM23
ADAM30
ADAM7
ADAMTS13
ADAMTS14
ADAMTS16
ADAMTS17
ADAMTS18
ADAMTS19-AS1
ADAMTS2
ADAMTS7
ADAMTS7P1
ADAMTS8
ADAMTSL2
ADARB2-AS1
ADCY1
ADCY2
ADCY3
ADCY5
ADCY6
ADCY9
ADCYAP1
ADCYAP1R1
ADGRA1
ADGRA1-AS1
ADGRA2
ADGRA3
ADGRB1
ADGRB2
ADGRF3
ADGRG4
ADGRL1
ADH5P3
ADM2
ADO
ADPGK-AS1
ADRA1D
ADRA2C
ADRB1
AF001548.1
AF001548.2
AF064860.1
AF067845.5
AF111169.3
AF121897.1
AF127577.4
AF129075.2
AF131216.1
AF131216.4
AF165147.1
AF213884.3
AF241725.1
AF279873.2
AF305872.2
AFAP1L1
AFF2
AGAP1
AGAP1-IT1
AGAP3
AGFG1
AGKP1
AGMAT
AGRN
AIPL1
AIRE
AJ271736.1
AJAP1
AJM1
AK6P1
AKAP17A
AKIRIN1
AKR7A2
AKT1
AL008635.1
AL008729.2
AL009031.1
AL009174.1
AL009178.3
AL020994.3
AL020998.1
AL021396.1
AL021917.1
AL021940.1
AL022069.1
AL022238.3
AL022313.2
AL022313.4
AL022315.1
AL022316.1
AL022324.1
AL022324.4
AL022328.3
AL022328.4
AL022332.2
AL022341.1
AL022722.1
AL022724.2
AL023754.1
AL023754.2
AL023806.1
AL024493.1
AL024507.2
AL031055.1
AL031123.5
AL031281.2
AL031281.3
AL031293.1
AL031577.1
AL031590.1
AL031658.1
AL031666.2
AL031666.3
AL031710.2
AL031726.1
AL031727.1
AL031727.2
AL031728.1
AL031846.1
AL031848.2
AL031963.3
AL031985.3
AL033381.3
AL033519.2
AL033527.2
AL034376.1
AL034379.1
AL034405.1
AL034550.2
AL035071.1
AL035078.3
AL035078.4
AL035258.1
AL035398.1
AL035411.3
AL035412.1
AL035420.1
AL035425.3
AL035427.1
AL035427.2
AL035443.1
AL035467.2
AL035541.1
AL035660.2
AL035681.1
AL049552.2
AL049629.2
AL049637.2
AL049641.1
AL049647.1
AL049712.1
AL049780.2
AL049792.1
AL049795.2
AL049796.1
AL049830.1
AL049844.1
AL049873.1
AL049874.3
AL050331.1
AL050344.2
AL078612.2
AL078624.1
AL078644.2
AL079303.1
AL079338.1
AL080243.1
AL080243.2
AL096677.1
AL096709.1
AL096711.1
AL096794.1
AL096865.1
AL109615.2
AL109615.3
AL109618.1
AL109761.1
AL109767.1
AL109811.2
AL109837.3
AL109840.2
AL109910.1
AL109917.1
AL109918.3
AL109920.1
AL109933.3
AL109946.1
AL109954.1
AL109955.1
AL109976.1
AL110118.1
AL117190.1
AL117190.2
AL117335.1
AL117344.2
AL118508.2
AL121603.1
AL121721.1
AL121723.1
AL121758.1
AL121761.1
AL121769.1
AL121776.1
AL121827.2
AL121895.1
AL121904.2
AL121908.1
AL121929.1
AL121936.1
AL121938.1
AL121956.4
AL121956.6
AL121974.1
AL121977.2
AL121981.1
AL121985.1
AL121992.1
AL122058.1
AL132639.2
AL132709.1
AL132780.1
AL132780.5
AL133163.1
AL133304.2
AL133325.2
AL133330.1
AL133346.1
AL133351.1
AL133371.1
AL133380.1
AL133415.1
AL133445.2
AL133475.1
AL133477.1
AL133480.1
AL133482.1
AL133485.1
AL133499.1
AL133516.1
AL135744.1
AL135791.1
AL135838.1
AL135902.1
AL135923.2
AL136038.1
AL136141.1
AL136164.3
AL136181.1
AL136226.1
AL136295.17
AL136295.5
AL136295.6
AL136298.1
AL136301.1
AL136441.1
AL136524.1
AL136528.1
AL136961.1
AL136981.1
AL136987.1
AL137002.2
AL137025.1
AL137060.1
AL137129.1
AL137139.1
AL137161.1
AL137785.1
AL137798.2
AL137802.1
AL137845.2
AL137847.2
AL138694.1
AL138716.1
AL138724.1
AL138740.1
AL138752.2
AL138778.1
AL138785.1
AL138807.1
AL138826.1
AL138830.1
AL138885.3
AL138895.2
AL138954.1
AL138963.3
AL138995.1
AL138997.1
AL139002.1
AL139005.1
AL139022.1
AL139095.2
AL139098.1
AL139100.1
AL139106.1
AL139120.1
AL139125.1
AL139156.1
AL139158.2
AL139161.1
AL139174.1
AL139231.1
AL139234.1
AL139260.3
AL139280.1
AL139288.1
AL139350.1
AL139353.3
AL139393.3
AL139400.1
AL139405.1
AL157394.2
AL157400.5
AL157702.2
AL157762.1
AL157777.1
AL157777.2
AL157827.1
AL157834.1
AL157871.3
AL157896.1
AL157912.1
AL157936.1
AL158032.1
AL158050.1
AL158069.1
AL158070.1
AL158077.2
AL158136.1
AL158195.1
AL158198.2
AL158206.1
AL158216.1
AL158800.1
AL158823.1
AL158824.1
AL158825.1
AL158837.1
AL158850.1
AL160171.1
AL160236.1
AL160272.1
AL160314.1
AL160408.1
AL160408.3
AL161421.1
AL161629.1
AL161644.1
AL161663.2
AL161668.3
AL161669.2
AL161729.2
AL161734.2
AL161757.4
AL161757.5
AL161772.1
AL161787.1
AL161908.1
AL162171.1
AL162311.2
AL162377.1
AL162385.1
AL162386.1
AL162391.1
AL162394.1
AL162426.1
AL162431.1
AL162582.1
AL162718.1
AL163195.3
AL163636.1
AL163973.2
AL352984.1
AL353135.1
AL353151.2
AL353152.2
AL353593.1
AL353604.1
AL353622.2
AL353653.1
AL353658.1
AL353662.2
AL353708.1
AL353709.1
AL353726.1
AL353743.1
AL353759.1
AL353807.1
AL354702.1
AL354743.2
AL354766.2
AL354809.1
AL354824.1
AL354861.2
AL354872.1
AL355001.2
AL355075.3
AL355075.5
AL355095.1
AL355096.1
AL355297.2
AL355304.1
AL355306.2
AL355309.1
AL355312.6
AL355337.1
AL355365.1
AL355388.1
AL355472.1
AL355499.1
AL355526.2
AL355592.1
AL355597.1
AL355607.1
AL355607.2
AL355881.1
AL355916.1
AL355916.2
AL355916.3
AL355922.1
AL355987.1
AL355987.4
AL355994.2
AL356000.1
AL356123.2
AL356215.1
AL356234.1
AL356234.2
AL356309.2
AL356361.3
AL356417.3
AL356421.2
AL356488.3
AL356489.4
AL356515.1
AL356534.1
AL356535.1
AL356585.4
AL356653.1
AL356752.1
AL356968.2
AL357033.3
AL357055.1
AL357055.2
AL357143.1
AL357153.1
AL357153.3
AL357172.1
AL357518.1
AL357632.1
AL357972.1
AL358176.3
AL358394.2
AL358472.1
AL358472.7
AL358613.2
AL358852.1
AL359091.1
AL359092.2
AL359182.1
AL359263.1
AL359378.1
AL359458.1
AL359541.1
AL359632.1
AL359704.1
AL359715.4
AL359764.1
AL359764.2
AL359834.1
AL359878.1
AL359915.1
AL359979.1
AL365184.1
AL365232.1
AL365272.1
AL365356.2
AL365434.1
AL365440.1
AL365440.2
AL389915.1
AL390294.1
AL390755.2
AL390760.1
AL390961.1
AL391056.1
AL391058.1
AL391244.1
AL391256.1
AL391422.2
AL391422.3
AL391422.4
AL391650.1
AL391704.2
AL391832.2
AL391840.1
AL392083.2
AL392086.1
AL392086.3
AL392172.2
AL441943.2
AL442639.1
AL445189.2
AL445209.1
AL445218.1
AL445248.1
AL445253.1
AL445259.1
AL445423.2
AL445470.1
AL445528.1
AL445644.1
AL445685.2
AL445931.1
AL449423.1
AL450163.1
AL450322.2
AL450326.1
AL450384.2
AL450468.2
AL450990.1
AL450992.1
AL450992.3
AL450998.1
AL450998.2
AL451007.3
AL451050.1
AL451050.2
AL451069.2
AL451085.1
AL451085.2
AL451123.2
AL512288.1
AL512310.7
AL512328.1
AL512380.1
AL512380.2
AL512427.2
AL512484.1
AL512599.1
AL513128.2
AL513128.3
AL513164.1
AL513323.1
AL513324.1
AL513365.1
AL513493.1
AL513523.2
AL583805.1
AL583827.1
AL589693.1
AL589986.2
AL590068.3
AL590096.1
AL590101.1
AL590139.1
AL590369.1
AL590396.1
AL590483.1
AL590550.1
AL590556.1
AL590560.3
[truncated: 4,934 more rows]

## Sheet: Table S2B
Supplemental Table S2B. RAMPAGE-only genes
Gene Name
AADACL2-AS1
ABCC6
ABCC6P2
AC002074.1
AC002456.1
AC002511.1
AC003965.2
AC003973.1
AC004057.1
AC004066.2
AC004691.2
AC004825.2
AC004839.1
AC004923.1
AC004946.1
AC004990.1
AC005052.2
AC005154.1
AC005329.2
AC005363.1
AC005363.2
AC005487.1
AC005538.3
AC005578.1
AC005614.1
AC005702.5
AC005759.2
AC005786.2
AC005914.1
AC005999.2
AC006019.1
AC006058.3
AC006160.1
AC006213.1
AC006942.1
AC007029.1
AC007114.2
AC007128.2
AC007223.1
AC007225.1
AC007365.1
AC007368.1
AC007448.2
AC007557.4
AC007620.1
AC007656.2
AC007773.1
AC007834.1
AC007906.2
AC008040.1
AC008060.3
AC008391.1
AC008393.1
AC008443.4
AC008464.1
AC008474.1
AC008525.1
AC008532.1
AC008555.4
AC008632.1
AC008641.1
AC008649.2
AC008663.2
AC008676.1
AC008687.4
AC008703.1
AC008763.1
AC008915.2
AC008972.2
AC009055.1
AC009065.4
AC009081.2
AC009108.5
AC009118.2
AC009158.1
AC009163.6
AC009245.1
AC009271.1
AC009299.3
AC009411.1
AC009511.2
AC009549.1
AC009654.1
AC010136.1
AC010201.3
AC010261.2
AC010267.1
AC010327.5
AC010336.5
AC010547.3
AC010595.1
AC010636.1
AC010638.1
AC010643.1
AC010737.1
AC010789.1
AC010872.2
AC010889.2
AC011029.1
AC011239.1
AC011290.1
AC011389.2
AC011416.3
AC011452.1
AC011472.1
AC011478.1
AC011479.4
AC011603.1
AC011752.1
AC011767.1
AC012055.1
AC012060.1
AC012078.2
AC012085.1
AC012306.2
AC012377.1
AC012379.1
AC012414.5
AC012456.1
AC012555.1
AC012645.1
AC012673.1
AC013644.1
AC015574.1
AC015660.2
AC015802.4
AC015849.2
AC015908.2
AC015917.2
AC016168.1
AC016168.4
AC016355.1
AC016629.2
AC016696.1
AC016738.1
AC016885.3
AC016888.1
AC016995.1
AC017002.1
AC017037.5
AC017083.1
AC017091.1
AC017101.1
AC017116.1
AC017116.2
AC018445.5
AC018521.4
AC018638.4
AC018682.1
AC018695.3
AC018716.2
AC018755.2
AC018761.2
AC018943.1
AC021127.1
AC021134.1
AC021236.1
AC021242.2
AC021504.1
AC021517.2
AC021851.2
AC022031.2
AC022081.1
AC022140.1
AC022154.1
AC022296.1
AC022433.1
AC022498.2
AC022506.2
AC022784.3
AC023024.1
AC023403.1
AC023503.1
AC023794.4
AC023886.1
AC024224.2
AC024451.2
AC024560.2
AC024592.2
AC024651.2
AC024937.2
AC024937.3
AC024940.2
AC025031.2
AC025043.1
AC025161.1
AC025165.1
AC025254.1
AC025259.1
AC025262.1
AC025475.2
AC025575.2
AC025754.1
AC025822.1
AC026355.2
AC026412.2
AC026523.4
AC026689.1
AC026736.1
AC026746.1
AC026904.1
AC027045.2
AC027288.1
AC027612.2
AC027613.1
AC027807.1
AC034102.3
AC044860.1
AC046195.1
AC062037.3
AC063919.1
AC063952.1
AC064799.1
AC067930.8
AC067960.1
AC068189.1
AC068338.3
AC068446.2
AC068522.1
AC068535.1
AC068587.7
AC068672.2
AC068688.1
AC068700.2
AC068987.3
AC069277.1
AC069285.1
AC069503.4
AC069547.2
AC069549.1
AC073115.2
AC073140.2
AC073270.1
AC073316.1
AC073321.1
AC073348.2
AC073389.1
AC073389.2
AC073632.1
AC073842.1
AC073878.1
AC074008.2
AC074033.1
AC074338.1
AC078788.1
AC078819.1
AC078850.2
AC078874.1
AC078925.1
AC079062.1
AC079145.1
AC079160.1
AC079328.2
AC079385.2
AC079598.1
AC079598.3
AC079753.2
AC079822.1
AC080013.5
AC083843.2
AC084064.1
AC084375.1
AC084809.1
AC087241.2
AC087276.2
AC087280.2
AC087379.2
AC087463.3
AC087499.7
AC087533.1
AC087645.4
AC087683.3
AC089985.1
AC090044.1
AC090164.4
AC090348.1
AC090579.1
AC090616.2
AC090644.1
AC090692.1
AC090825.1
AC091057.2
AC091096.1
AC091133.2
AC091153.3
AC091544.4
AC091820.1
AC091951.1
AC091951.3
AC091965.1
AC092042.1
AC092114.1
AC092118.1
AC092159.1
AC092268.2
AC092295.1
AC092306.1
AC092335.1
AC092364.2
AC092435.2
AC092447.5
AC092468.1
AC092490.1
AC092535.3
AC092590.1
AC092652.2
AC092652.3
AC092803.4
AC092809.4
AC092811.2
AC092902.4
AC092902.5
AC092903.2
AC092916.1
AC092969.1
AC092979.1
AC093001.2
AC093249.2
AC093274.1
AC093298.1
AC093307.1
AC093390.1
AC093484.3
AC093515.1
AC093635.1
AC093642.1
AC093730.1
AC093772.1
AC093835.1
AC093838.1
AC093898.1
AC093909.4
AC093912.1
AC093916.1
AC094103.1
AC095031.1
AC096536.3
AC096537.1
AC096711.2
AC097173.1
AC097521.1
AC097662.1
AC097709.1
AC098487.1
AC098825.1
AC099508.2
AC099518.4
AC099542.1
AC099566.1
AC099654.1
AC099684.3
AC100756.4
AC100812.1
AC100825.1
AC100868.1
AC103409.1
AC103952.1
AC104024.4
AC104041.1
AC104187.1
AC104211.2
AC104232.3
AC104596.1
AC104633.2
AC104634.2
AC104664.1
AC104687.2
AC104758.3
AC104770.1
AC104850.2
AC104984.4
AC104985.3
AC105021.1
AC105052.1
AC105137.2
AC105206.2
AC105233.4
AC105233.5
AC105271.1
AC105916.1
AC106771.1
AC106786.2
AC106799.2
AC106820.5
AC106865.1
AC106876.1
AC106895.2
AC107031.1
AC107032.1
AC107072.1
AC107072.2
AC107871.2
AC107896.1
AC108002.2
AC108047.1
AC108075.1
AC108210.1
AC108479.3
AC108519.1
AC108752.1
AC109349.1
AC109583.3
AC109635.5
AC110011.1
AC110296.1
AC110609.1
AC110795.1
AC110813.1
AC111152.2
AC112178.1
AC113133.1
AC113382.1
AC113423.2
AC114489.1
AC114956.1
AC115223.1
AC115618.1
AC116345.4
AC117422.1
AC117470.1
AC117481.1
AC117509.1
AC117528.1
AC117834.1
AC118758.1
AC119396.2
AC119427.2
AC120114.1
AC120114.2
AC120194.1
AC122688.2
AC123768.3
AC124068.2
AC124312.3
AC124319.5
AC124852.1
AC124864.3
AC124944.1
AC125618.1
AC125807.1
AC126182.3
AC127070.1
AC127526.2
AC129492.2
AC129492.5
AC129803.1
AC130710.1
AC131025.3
AC131180.1
AC131235.2
AC131274.3
AC131532.1
AC131571.1
AC132217.1
AC132938.6
AC133041.1
AC133530.1
AC133548.2
AC135012.1
AC135048.1
AC136443.1
AC136475.1
AC136475.8
AC136604.3
AC137695.3
AC138304.1
AC138356.3
AC138393.1
AC138409.1
AC138409.2
AC139720.1
AC139795.3
AC140725.1
AC145207.8
AC183088.3
AC211486.1
AC236972.3
AC237221.1
AC241377.2
AC242842.1
AC242842.2
AC242988.1
AC243585.2
AC243830.1
AC244102.3
AC244102.4
AC244230.1
AC244517.2
AC244517.8
AC244669.1
AC245060.4
AC245100.8
AC245100.9
AC245517.2
AC245595.1
AF121898.1
AF131216.5
AF186192.2
AF196972.1
AF228730.5
AF274858.1
AGAP5
AGAP6
AK4P1
AL009177.1
AL020997.5
AL021408.2
AL021978.1
AL022162.1
AL022311.1
AL022332.1
AL023803.1
AL031663.3
AL031668.2
AL031767.2
AL031772.1
AL031847.1
AL031847.2
AL032819.1
AL033527.6
AL033530.1
AL034351.4
AL035661.2
AL035670.1
AL049597.1
AL049597.2
AL049646.1
AL049775.2
AL049840.3
AL049869.3
AL078587.2
AL078645.1
AL096701.4
AL109837.2
AL109955.2
AL110292.1
AL117382.1
AL121574.1
AL121582.1
AL121772.2
AL121809.1
AL121821.1
AL121832.1
AL121845.3
AL121899.1
AL121899.2
AL121932.2
AL121983.2
AL122003.2
AL132775.2
AL132780.2
AL132857.1
AL133166.1
AL133216.2
AL133244.2
AL133259.1
AL133279.3
AL133299.1
AL133383.1
AL133464.1
AL133477.2
AL133551.1
AL135910.1
AL136038.3
AL136084.3
AL136096.1
AL136131.2
AL136131.3
AL136307.1
AL136309.4
AL136372.2
AL136376.1
AL137100.3
AL137802.2
AL137802.3
AL138733.1
AL138930.1
AL139035.1
AL139042.1
AL139274.2
AL139398.1
AL139412.1
AL139819.1
AL157371.1
AL158038.1
AL158064.1
AL158154.2
AL158212.2
AL158801.5
AL158847.1
AL160291.1
AL161668.1
AL161714.1
AL161740.1
AL162311.3
AL162586.2
AL163953.1
AL352979.4
AL353595.1
AL353660.1
AL353807.2
AL354733.1
AL354821.1
AL355334.2
AL355596.2
AL355835.1
AL356124.1
AL356317.2
AL356417.2
AL357093.2
AL357140.2
AL357141.1
AL357507.1
AL357556.4
AL357558.2
AL357873.1
AL358074.1
AL358944.1
AL359094.1
AL359094.2
AL359508.1
AL359547.1
AL359636.2
AL359853.2
AL359962.3
AL360013.3
AL360268.2
AL365214.4
AL365436.1
AL390961.3
AL391152.1
AL391557.1
AL391560.1
AL391839.2
AL442003.2
AL442636.1
AL445250.1
AL445433.2
AL445686.2
AL450998.3
AL451070.1
AL451074.1
AL512343.2
AL512358.1
AL512430.2
AL512625.1
AL512625.2
AL512625.3
AL512638.3
AL512641.1
AL513318.2
AL513327.2
AL583808.1
AL583835.2
AL583836.1
AL589645.1
AL589987.2
AL590027.1
AL590099.1
AL590235.1
AL590385.2
AL590399.1
AL590483.4
AL590560.4
AL590666.4
AL590787.1
AL591684.2
AL592227.1
AL592402.1
AL592486.1
AL606923.2
AL606970.3
AL627171.2
AL645939.4
AL646090.2
AL662844.4
AL662860.1
AL669831.5
AL669831.6
AL669970.3
AL671277.1
AL672167.1
AL672291.1
AL691447.2
AL713999.1
AL731769.2
AL807776.1
AL928711.1
AL953883.1
ALMS1P1
ANGPT1
ANHX
ANKDD1B
ANKRD20A5P
ANKRD26P3
ANKRD30BL
ANKRD61
ANTXRL
AP000240.1
AP000253.1
AP000320.1
AP000356.4
AP000358.1
AP000446.1
AP000459.2
AP000474.2
AP000781.1
AP000802.1
AP000812.1
AP000842.3
AP000851.1
AP000866.1
AP000873.5
AP000944.1
AP001000.1
AP001042.3
AP001258.1
AP001318.2
AP001425.1
AP001596.1
AP001599.1
AP001636.3
AP001803.2
AP001830.1
AP001931.1
AP001981.2
AP002008.3
AP002444.1
AP002755.1
AP002759.1
AP002800.1
AP002954.2
AP002992.1
AP003032.1
AP003055.1
AP003068.1
AP003306.1
AP003390.1
AP003392.6
AP003472.1
AP003472.2
AP003500.2
AP003716.1
AP003774.1
AP003778.1
AP003900.1
AP004608.1
AP005205.2
AP005262.2
AP006216.2
AP006294.2
AP006748.2
AQP7P3
AQP7P5
ARHGAP35
ARHGEF35
ARL17A
ARMC4P1
ASB18
ASTN2-AS1
ATP6V1B1-AS1
ATXN2-AS
ATXN7
ATXN8OS
AVPR2
AWAT1
AWAT2
AZGP1P2
B4GALT1-AS1
BBOX1-AS1
BCAP31P1
BCRP1
BCRP3
BCYRN1
BICDL1
BICRA
BMS1P10
BMS1P8
BNIP3P11
BOLA2-SMG1P6
BTF3L4P2
BX072579.2
BX284613.2
BX322234.1
BX664615.1
BX664615.2
BX679664.3
BX842568.3
C17orf77
C17orf98
C1orf143
C1orf68
C22orf15
C22orf24
C2orf83
C5orf17
C9orf170
CA5A
CASC9
CATSPER4
CBWD1
CBWD2
CBWD3
CBWD5
CBWD6
CC2D2B
CCDC148
CCDC200
CEACAM19
CECR7
CELP
CEP164P1
CERNA3
CERS3-AS1
CFHR1
CFHR2
CHEK2P2
CHL1-AS2
CHMP4BP1
CLEC18A
CLEC18B
CLK3
CLYBL-AS1
CNTNAP3
CNTNAP3C
CNTNAP3P2
COX20P1
COX6A1P2
CPXCR1
CR769767.2
CR786580.1
CRYGN
CT45A3
CT55
CTAGE10P
CTAGE11P
CTAGE13P
CTAGE15
CTAGE16P
CTAGE7P
CTAGE9
CTSLP3
CU104787.1
CU633967.1
CXCL13
CXorf58
CYP11B2
CYP21A1P
CYP2AB1P
DBF4P1
DCAF8L1
DDT
DEFB4B
DEPDC1-AS1
DEPDC4
DGAT2L6
DHCR24-DT
DIAPH3-AS1
DLG3-AS1
DLX2-DT
DNM1P46
DSG4
DTX2
DTX2P1-UPK3BP1-PMS2P11
DUXAP10
DUXAP8
DUXAP9
EFCAB9
EHMT2-AS1
EIF2S3B
EIF3CL
ENO1-AS1
EPN2-AS1
ERICH6B
ESRG
ESRRAP1
FAHD2B
FAM111A-DT
FAM133DP
FAM153A
FAM157A
FAM209A
FAM209B
FAM230C
FAM230I
FAM236A
FAM236D
FAM238C
FAM242C
FAM242E
FAM242F
FAM25C
FAM25G
FAM27C
FAM30A
FAM41C
FAM72A
FAM72B
FAM83C-AS1
FAM86B2
FAM86C2P
FAM86FP
FAM92A1P2
FAM9A
FAM9B
FAR2P2
FBXL15
FBXW12
FCGR1A
FCGR1CP
FCGR2C
FGF13-AS1
FGF7P6
FMO9P
FO393415.1
FOCAD
FOLH1B
FOXO3B
FOXP1-AS1
FP325317.1
FP325317.2
FP671120.5
FP885919.1
FRG1EP
FRG2DP
FRY-AS1
GAGE13
GCC2-AS1
GCSHP5
GDF9
GGT3P
GGT5
GGTLC1
GGTLC2
GGTLC3
GHET1
GLUD1P2
GML
GOLGA2P10
GOLGA6A
GOLGA8H
GOLGA8M
GPC5-AS2
GPR89P
GPS2P2
GRAP
GTF2H2
GTF2H2B
GTF2H2C
GTSE1-DT
H2AFB1
HCCAT5
HCRT
HERC2
HERC2P3
HIST1H2APS2
HIST2H3C
HIST2H3PS2
HLA-U
HLX-AS1
HMGB1P24
HMGB1P3
HMGB1P6
HMGB3P27
HMGN2P3
HMGN2P5
HNRNPA1P15
HNRNPA1P7
HNRNPA3P6
HOMER2P1
HPR
HSD17B7
HYDIN2
IGHV3-22
IGHV3-30
IGHV3-66
IGHV4-31
IGKV1-12
IGKV1-13
IGKV1-17
IGKV1-33
IGKV1-39
IGKV1-9
IGKV1D-12
IGKV1D-13
IGKV1D-42
IGKV1D-43
IGKV1D-8
IGKV1OR1-1
IGKV2-18
IGKV2-24
IGKV2-26
IGKV2-28
IGKV2-29
IGKV2-30
IGKV2D-10
IGKV3-15
IGKV3D-11
IGKV3D-15
IGKV3OR2-268
IGLV3-6
INSYN1-AS1
IZUMO1
KCNMB2-AS1
KCNQ5-AS1
KF456478.1
KIAA1210
KIAA2012-AS1
KIR3DL1
KIZ-AS1
KLHL6-AS1
KLLN
KPNA2P3
KRT16P2
KRT16P5
KRT16P6
KRT26
KRT32
KRT73
KRT82
KRTAP10-10
KRTAP10-2
KRTAP10-7
KRTAP10-8
KRTAP12-1
KRTAP12-2
KRTAP5-8
KRTAP9-4
KRTAP9-9
LALBA
LARGE1
LBX1-AS1
LCE2B
LCE2C
LEXM
LGALS7
LINC00167
LINC00240
LINC00313
LINC00327
LINC00342
LINC00348
LINC00370
LINC00398
LINC00408
LINC00448
LINC00457
LINC00470
LINC00502
LINC00581
LINC00607
LINC00623
LINC00629
LINC00640
LINC00648
LINC00678
LINC00687
LINC00689
LINC00700
LINC00851
LINC00858
LINC00863
LINC00871
LINC00891
LINC00957
LINC01001
LINC01002
LINC01019
LINC01052
LINC01098
LINC01099
LINC01121
LINC01138
LINC01144
LINC01145
LINC01201
LINC01233
LINC01285
LINC01289
LINC01303
LINC01347
LINC01374
LINC01410
LINC01419
LINC01433
LINC01456
LINC01479
LINC01491
LINC01498
LINC01553
LINC01560
LINC01584
LINC01586
LINC01587
LINC01643
LINC01647
LINC01665
LINC01666
LINC01674
LINC01705
LINC01715
LINC01729
LINC01743
LINC01793
LINC01805
LINC01807
LINC01818
LINC01822
LINC01837
LINC01841
LINC01868
LINC01876
LINC01880
LINC01885
LINC01894
LINC01898
LINC01900
LINC01909
LINC01938
LINC01939
LINC01942
LINC01943
LINC01967
LINC01986
LINC01996
LINC02005
LINC02018
LINC02021
LINC02046
LINC02050
LINC02058
LINC02086
LINC02087
LINC02088
LINC02090
LINC02139
LINC02144
LINC02148
LINC02156
LINC02163
LINC02176
LINC02184
LINC02188
LINC02197
LINC02226
LINC02235
LINC02249
LINC02254
LINC02256
LINC02259
LINC02281
LINC02306
LINC02315
LINC02326
LINC02360
LINC02372
LINC02400
LINC02401
LINC02412
LINC02440
LINC02441
LINC02501
LINC02505
LINC02537
LINC02542
LINC02558
LINC02560
LINC02588
LINC02614
LINC02618
LINC02625
LINC02635
LINC02636
LINC02659
LINC02668
LIPM
LIX1-AS1
LNCARSR
LYG2
LYPD9P
MAGEA2B
MAGEA6
MAGEB10
MAMDC2-AS1
MAPK6-DT
MARCKSL1P2
MED15P9
MEI4
METTL11B
METTL14-DT
METTL2A
MIA-RAB4B
MIMT1
MIR101-1
MIR10B
MIR1228
MIR1244-1
MIR125B2
MIR1291
MIR1306
MIR1307
MIR130A
MIR146B
MIR152
MIR188
MIR192
MIR194-2
MIR200B
MIR218-2
MIR224
MIR26B
MIR3136
MIR34A
MIR362
MIR3651
MIR424
MIR4258
MIR4300HG
MIR4435-2HG
MIR4444-2
MIR4521
MIR4522
MIR4673
MIR4713HG
MIR4738
MIR4754
MIR500A
MIR503
MIR503HG
MIR509-1
MIR509-2
MIR509-3
MIR5091
MIR5093
MIR513A2
MIR513B
MIR513C
MIR532
MIR542
MIR5689HG
MIR5690
MIR5701-2
MIR635
MIR6501
MIR6730
MIR6738
MIR6756
MIR6782
MIR6802
MIR6819
MIR6857
MIR6866
MIR6867
MIR6887
MIR7107
MIR7162
MIR762
MIR802
MIR876
MIRLET7F2
MIRLET7G
MKRN2OS
MS4A6E
MSTO1
MSX2P1
MTND1P30
MUC22
NAALADL2-AS1
NBPF18P
NCF1
NCF1B
NCF1C
NCKAP5-AS2
NEURL1-AS1
NKX2-1-AS1
NOL4
NOMO2
NOTCH2NLA
NRBF2P2
NSUN5P2
NTN5
OBP2B
OR2AJ1
OR6L2P
OR7E91P
ORM1
OSGEPL1-AS1
OTOG
OXGR1
P2RX6
P2RX6P
PABPC4-AS1
PABPC5-AS1
PARG
PCDHB8
PCDHGB4
PCGEM1
PDE11A
PDIA3P2
PGA4
PGA5
PGM5-AS1
PINLYP
PIP5K1P1
PIPSL
PITRM1-AS1
PLCG1-AS1
PLCH1-AS1
PLG
PLGLB1
PLGLB2
PMS2P2
PMS2P7
PMS2P9
PNRC2P1
POLR2J3
POLR2J3
POTEC
POTEF
POTEH
PPEF1
PPIP5K1
PPP1R2P2
PRAMEF10
PRDM7
PRDM9
PRNT
PRORSD1P
PRSS44P
PRSS50
PSMC1P1
PTCHD1-AS
PTENP1
PTGER4P2
PTOV1-AS1
PTPRVP
PVALEF
PYCARD-AS1
PYDC1
RAB41
RAB6C-AS1
RASA4
RASA4B
RASA4CP
RDM1P5
RF00003
RF00003
RF00003
RF00017
RF00026
RF00086
RF00407
RF00622
RF01159
RF01241
RF01684
RF01928
RF01956
RF01957
RF01986
RF01987
RF02174
RF02175
RF02176
RF02271
RF02271
RGPD2
RGPD3
RGPD4-AS1
RGPD8
RHEBP1
RN7SKP175
RN7SKP210
RN7SKP255
RN7SL2
RN7SL3
RN7SL4P
RN7SL5P
RN7SL628P
RN7SL736P
RN7SL82P
RNA5-8SN2
RNF103-CHMP3
RNF144A-AS1
RNU1-13P
RNU1-2
RNU5B-1
RNU6-3P
RNU6-6P
RNU6-8
RNVU1-18
RNVU1-7
RNY3
ROPN1
ROR1-AS1
RPL13AP5
RPL17P36
RPL21P65
RPL22P1
RPL23AP53
RPL23AP65
RPL23AP7
RPL36AP48
RPL41P1
RPL5P34
RPL7AP6
RPL7P1
RPL7P9
RPS27AP16
RPS27P22
RPS2P32
RRN3
RSPH10B
RSPH10B2
RTL3
RWDD4P2
SCARNA6
SCYGR3
SCYGR7
SDHAP1
SEC14L6
SEMA4G
SERBP1P5
SERPINA12
SETP21
SIAH1P1
SIGLEC11
SIGLEC14
SIRT4
SKOR2
SLC14A2-AS1
SLC22A14
SLC25A39P2
SMG1
SMG7-AS1
SMIM23
SMIM28
SNHG31
SNORA10
SNORA17B
SNORA17B
SNORA22
SNORA22C
SNORA26
SNORA2C
SNORA30
SNORA47
SNORA50B
SNORA54
SNORA55
SNORA58
SNORA58B
SNORA59B
SNORA62
SNORA66
SNORA67
SNORA68
SNORA71A
SNORA7A
SNORA7B
SNORA80D
SNORA84
SNORD109A
SNORD114-25
SNORD115-5
SNORD116-1
SNORD116-17
SNORD116-18
SNORD116-2
SNORD116-20
SNORD116-26
SNORD116-29
SNORD116-3
SNORD116-5
SNORD116-6
SNORD15A
SNORD18B
SNORD21
SNORD24
SNORD3B-1
SNORD3C
SNORD67
SNORD73A
SNORD83B
SNORD9
SNRPGP2
SPART-AS1
SPDYE1
SPDYE3
SPIN2A
SPRY3
SRGAP2B
SRGAP3-AS3
SRGAP3-AS4
ST3GAL6-AS1
STAG3L2
STAG3L3
STAM-AS1
STARD13-AS
STEAP2-AS1
STK19B
STK4-AS1
SUMO2P1
TAF1L
TBC1D28
TBC1D3P2
TBC1D3P5
TCP10
TDRD15
TENT5D
TESC-AS1
TGIF2LY
THOC3
TM4SF1-AS1
TM4SF19-AS1
TMEM132D-AS1
TMEM191B
TMEM191C
TMEM262
TMPOP2
TOB1-AS1
TOPAZ1
TPTE2P2
TRIM50
TRIM51
TRMT112P6
TRPC7
TRPV1
TSPY6P
TTC39A-AS1
TUBBP5
TUSC7
TWF1P1
U52111.1
U62317.4
U91319.1
UBE2Q2P1
UBE2Q2P2
UBE2R2-AS1
UCHL1-AS1
UGT1A2P
UGT1A3
ULK4P3
UPF3AP1
UPK3BL1
URAHP
VCX3B
VTRNA1-2
WASH3P
WASH5P
WBP11P1
WEE2-AS1
WHAMMP3
WSPAR
WTAPP1
WWOX-AS1
XKR3
YY2
Z83818.2
Z97055.2
Z97056.1
Z98752.4
Z98884.1
Z99916.1
ZFP28
ZNF124
ZNF197-AS1
ZNF252P-AS1
ZNF286B
ZNF658
ZNF683
ZNF710-AS1
ZNF80

## Sheet: Table S2C
Supplemental Table S2C. GO enrichment for CAGE-only genes
GO Ontology database (Released 2020-03-23)	PANTHER Overrepresentation Test (Released 20200407)
CAGE-only Genes
GO category	GO term	# background	# observed	# expected	Fold enrichment	p-value	FDR
GO biological process complete	positive regulation of peptidyl-serine phosphorylation of STAT protein (GO:0033141)	10	9	1.58	5.69	0.000413	0.0236
GO biological process complete	dorsal spinal cord development (GO:0021516)	21	12	3.32	3.61	0.000901	0.0444
GO biological process complete	serotonin receptor signaling pathway (GO:0007210)	21	12	3.32	3.61	0.000901	0.0443
GO biological process complete	phototransduction (GO:0007602)	41	23	6.49	3.55	6.07e-06	0.000561
GO biological process complete	detection of visible light (GO:0009584)	43	24	6.8	3.53	4.1e-06	0.000394
GO biological process complete	regulation of AMPA receptor activity (GO:2000311)	24	13	3.8	3.42	0.000811	0.0415
GO biological process complete	detection of light stimulus (GO:0009583)	57	30	9.02	3.33	6.9e-07	8e-05
GO biological process complete	odontogenesis of dentin-containing tooth (GO:0042475)	75	31	11.87	2.61	2.47e-05	0.00193
GO biological process complete	cell fate specification (GO:0001708)	87	35	13.77	2.54	1.38e-05	0.00116
GO biological process complete	visual perception (GO:0007601)	209	84	33.07	2.54	1.34e-11	5.17e-09
GO biological process complete	sensory perception of light stimulus (GO:0050953)	212	85	33.55	2.53	1.06e-11	4.3e-09
GO biological process complete	cell differentiation in spinal cord (GO:0021515)	55	22	8.7	2.53	0.000622	0.0335
GO biological process complete	neuropeptide signaling pathway (GO:0007218)	93	37	14.72	2.51	8.43e-06	0.00076
GO biological process complete	detection of external stimulus (GO:0009581)	116	46	18.36	2.51	7.81e-07	8.85e-05
GO biological process complete	neuron fate commitment (GO:0048663)	67	26	10.6	2.45	0.000358	0.0213
GO biological process complete	diencephalon development (GO:0021536)	73	28	11.55	2.42	0.000199	0.0126
GO biological process complete	detection of abiotic stimulus (GO:0009582)	118	45	18.67	2.41	2.77e-06	0.000278
GO biological process complete	regulation of glutamate receptor signaling pathway (GO:1900449)	65	24	10.29	2.33	0.000897	0.0444
GO biological process complete	adenylate cyclase-inhibiting G protein-coupled receptor signaling pathway (GO:0007193)	74	27	11.71	2.31	0.000419	0.0238
GO biological process complete	odontogenesis (GO:0042476)	112	40	17.72	2.26	3.96e-05	0.00295
GO biological process complete	canonical Wnt signaling pathway (GO:0060070)	80	28	12.66	2.21	0.00062	0.0335
GO biological process complete	potassium ion transmembrane transport (GO:0071805)	149	52	23.58	2.21	3.84e-06	0.000374
GO biological process complete	anterior/posterior pattern specification (GO:0009952)	207	72	32.76	2.2	5.38e-08	8.72e-06
GO biological process complete	detection of stimulus involved in sensory perception (GO:0050906)	88	30	13.92	2.15	0.000633	0.0338
GO biological process complete	spinal cord development (GO:0021510)	108	36	17.09	2.11	0.000226	0.0141
GO biological process complete	endocrine system development (GO:0035270)	121	40	19.15	2.09	0.000122	0.0081
GO biological process complete	potassium ion transport (GO:0006813)	158	52	25	2.08	1.67e-05	0.00137
GO biological process complete	regionalization (GO:0003002)	325	104	51.43	2.02	2.5e-09	5.68e-07
GO biological process complete	cell fate commitment (GO:0045165)	248	79	39.24	2.01	3.44e-07	4.17e-05
GO biological process complete	adenylate cyclase-activating G protein-coupled receptor signaling pathway (GO:0007189)	117	37	18.51	2	0.000538	0.0298
GO biological process complete	retina development in camera-type eye (GO:0060041)	143	45	22.63	1.99	0.000155	0.0101
GO biological process complete	cAMP-mediated signaling (GO:0019933)	136	42	21.52	1.95	0.000383	0.0223
GO biological process complete	adenylate cyclase-modulating G protein-coupled receptor signaling pathway (GO:0007188)	195	60	30.86	1.94	1.96e-05	0.00158
GO biological process complete	G protein-coupled receptor signaling pathway, coupled to cyclic nucleotide second messenger (GO:0007187)	216	66	34.18	1.93	1.01e-05	0.000884
GO biological process complete	camera-type eye morphogenesis (GO:0048593)	122	37	19.31	1.92	0.00103	0.049
GO biological process complete	sensory perception (GO:0007600)	486	146	76.9	1.9	6.53e-11	2.21e-08
GO biological process complete	eye morphogenesis (GO:0048592)	150	44	23.74	1.85	0.000683	0.036
GO biological process complete	pattern specification process (GO:0007389)	418	122	66.14	1.84	1.18e-08	2.25e-06
GO biological process complete	sensory organ morphogenesis (GO:0090596)	260	75	41.14	1.82	1.24e-05	0.00107
GO biological process complete	detection of stimulus (GO:0051606)	236	67	37.34	1.79	6.46e-05	0.00454
GO biological process complete	cyclic-nucleotide-mediated signaling (GO:0019935)	159	45	25.16	1.79	0.000961	0.0466
GO biological process complete	skeletal system morphogenesis (GO:0048705)	236	66	37.34	1.77	9.13e-05	0.00619
GO biological process complete	adaptive immune response (GO:0002250)	503	140	79.59	1.76	1.19e-08	2.25e-06
GO biological process complete	neuron projection guidance (GO:0097485)	260	72	41.14	1.75	5.12e-05	0.0037
GO biological process complete	G protein-coupled receptor signaling pathway (GO:0007186)	778	215	123.11	1.75	1.67e-12	9.16e-10
GO biological process complete	central nervous system neuron differentiation (GO:0021953)	185	51	29.27	1.74	0.000777	0.0402
GO biological process complete	camera-type eye development (GO:0043010)	311	85	49.21	1.73	1.64e-05	0.00135
GO biological process complete	axonogenesis (GO:0007409)	371	100	58.71	1.7	4.85e-06	0.000458
GO biological process complete	regulation of ossification (GO:0030278)	193	52	30.54	1.7	0.001	0.048
GO biological process complete	axon guidance (GO:0007411)	257	69	40.67	1.7	0.00017	0.011
GO biological process complete	sensory organ development (GO:0007423)	542	144	85.76	1.68	8.86e-08	1.29e-05
GO biological process complete	regulation of animal organ morphogenesis (GO:2000027)	254	67	40.19	1.67	0.000392	0.0226
GO biological process complete	embryonic morphogenesis (GO:0048598)	563	148	89.09	1.66	1.08e-07	1.52e-05
GO biological process complete	eye development (GO:0001654)	350	91	55.38	1.64	4.41e-05	0.00322
GO biological process complete	nervous system process (GO:0050877)	890	230	140.83	1.63	6.93e-11	2.29e-08
GO biological process complete	sensory system development (GO:0048880)	360	93	56.97	1.63	5.45e-05	0.00392
GO biological process complete	axon development (GO:0061564)	407	105	64.4	1.63	1.54e-05	0.00129
GO biological process complete	visual system development (GO:0150063)	354	91	56.02	1.62	6.42e-05	0.00455
GO biological process complete	animal organ morphogenesis (GO:0009887)	941	237	148.9	1.59	2.63e-10	7.33e-08
GO biological process complete	cell morphogenesis involved in neuron differentiation (GO:0048667)	434	108	68.68	1.57	4.58e-05	0.00334
GO biological process complete	skeletal system development (GO:0001501)	484	117	76.59	1.53	6.47e-05	0.00453
GO biological process complete	forebrain development (GO:0030900)	389	94	61.55	1.53	0.000359	0.0213
GO biological process complete	morphogenesis of an epithelium (GO:0002009)	429	103	67.88	1.52	0.0002	0.0126
GO biological process complete	regulation of ion transmembrane transport (GO:0034765)	459	110	72.63	1.51	0.00015	0.00987
GO biological process complete	cell surface receptor signaling pathway involved in cell-cell signaling (GO:1905114)	405	96	64.09	1.5	0.000586	0.032
GO biological process complete	chemical synaptic transmission (GO:0007268)	385	91	60.92	1.49	0.000896	0.0446
GO biological process complete	anterograde trans-synaptic signaling (GO:0098916)	385	91	60.92	1.49	0.000896	0.0445
GO biological process complete	neuron projection morphogenesis (GO:0048812)	482	113	76.27	1.48	0.000265	0.0163
GO biological process complete	cell morphogenesis involved in differentiation (GO:0000904)	551	129	87.19	1.48	8.51e-05	0.00583
GO biological process complete	plasma membrane bounded cell projection morphogenesis (GO:0120039)	486	113	76.9	1.47	0.000351	0.021
GO biological process complete	tissue morphogenesis (GO:0048729)	555	129	87.82	1.47	0.000113	0.00756
GO biological process complete	embryonic organ development (GO:0048568)	431	100	68.2	1.47	0.000836	0.0426
GO biological process complete	regulation of transmembrane transport (GO:0034762)	542	125	85.76	1.46	0.000188	0.012
GO biological process complete	cell projection morphogenesis (GO:0048858)	490	113	77.54	1.46	0.000376	0.022
GO biological process complete	cation transmembrane transport (GO:0098655)	597	137	94.47	1.45	0.000122	0.00812
GO biological process complete	inorganic cation transmembrane transport (GO:0098662)	537	121	84.97	1.42	0.000525	0.0292
GO biological process complete	inorganic ion transmembrane transport (GO:0098660)	626	139	99.06	1.4	0.000385	0.0223
GO biological process complete	neuron differentiation (GO:0030182)	992	218	156.97	1.39	1.25e-05	0.00107
GO biological process complete	central nervous system development (GO:0007417)	971	213	153.65	1.39	1.55e-05	0.00129
GO biological process complete	regulation of ion transport (GO:0043269)	667	146	105.54	1.38	0.000467	0.0264
GO biological process complete	cell-cell signaling (GO:0007267)	1106	238	175.01	1.36	1.55e-05	0.00129
GO biological process complete	ion transmembrane transport (GO:0034220)	860	185	136.08	1.36	0.000175	0.0113
GO biological process complete	embryo development (GO:0009790)	986	211	156.02	1.35	6.48e-05	0.00451
GO biological process complete	neuron development (GO:0048666)	806	171	127.54	1.34	0.000488	0.0274
GO biological process complete	generation of neurons (GO:0048699)	1528	322	241.79	1.33	1.91e-06	0.000198
GO biological process complete	system process (GO:0003008)	1459	307	230.87	1.33	4.03e-06	0.00039
GO biological process complete	regulation of nervous system development (GO:0051960)	930	195	147.16	1.33	0.000348	0.0209
GO biological process complete	neurogenesis (GO:0022008)	1629	341	257.77	1.32	1.56e-06	0.000166
GO biological process complete	nervous system development (GO:0007399)	2314	469	366.16	1.28	2.74e-07	3.4e-05
GO biological process complete	transmembrane transport (GO:0055085)	1221	247	193.21	1.28	0.00038	0.0222
GO biological process complete	anatomical structure morphogenesis (GO:0009653)	2114	424	334.51	1.27	3.1e-06	0.000305
GO biological process complete	animal organ development (GO:0048513)	3044	594	481.68	1.23	4.22e-07	5.04e-05
GO biological process complete	cell surface receptor signaling pathway (GO:0007166)	2341	455	370.43	1.23	2.25e-05	0.00178
GO biological process complete	Unclassified (UNCLASSIFIED)	1859	356	294.16	1.21	0.000583	0.032
GO biological process complete	regulation of cell differentiation (GO:0045595)	1795	343	284.04	1.21	0.000876	0.0442
GO biological process complete	regulation of multicellular organismal development (GO:2000026)	2026	384	320.59	1.2	0.000727	0.038
GO biological process complete	system development (GO:0048731)	4234	799	669.98	1.19	2.29e-07	3.01e-05
GO biological process complete	multicellular organism development (GO:0007275)	4813	895	761.6	1.18	2.63e-07	3.32e-05
GO biological process complete	cell differentiation (GO:0030154)	3519	648	556.84	1.16	9.01e-05	0.00614
GO biological process complete	signaling (GO:0023052)	4752	869	751.95	1.16	5.22e-06	0.00049
GO biological process complete	signal transduction (GO:0007165)	4407	804	697.35	1.15	2.16e-05	0.00172
GO biological process complete	multicellular organismal process (GO:0032501)	6222	1132	984.56	1.15	9.4e-08	1.36e-05
GO biological process complete	cellular developmental process (GO:0048869)	3573	650	565.38	1.15	0.000295	0.0178
GO biological process complete	cell communication (GO:0007154)	4854	876	768.09	1.14	3.09e-05	0.00237
GO biological process complete	anatomical structure development (GO:0048856)	5170	920	818.09	1.12	0.000109	0.00739
GO biological process complete	developmental process (GO:0032502)	5589	973	884.39	1.1	0.000935	0.0456
GO molecular function complete	frizzled binding (GO:0005109)	38	22	6.01	3.66	6.6e-06	0.00086
GO molecular function complete	delayed rectifier potassium channel activity (GO:0005251)	30	17	4.75	3.58	8.85e-05	0.00715
GO molecular function complete	neuropeptide receptor activity (GO:0008188)	41	23	6.49	3.55	6.07e-06	0.000813
GO molecular function complete	G protein-coupled amine receptor activity (GO:0008227)	32	16	5.06	3.16	0.000417	0.0268
GO molecular function complete	voltage-gated potassium channel activity (GO:0005249)	82	39	12.98	3.01	1.43e-07	3.36e-05
GO molecular function complete	voltage-gated cation channel activity (GO:0022843)	127	57	20.1	2.84	9.91e-10	3.57e-07
GO molecular function complete	neurotransmitter binding (GO:0042165)	53	23	8.39	2.74	0.00015	0.0112
GO molecular function complete	potassium channel activity (GO:0005267)	114	46	18.04	2.55	6.11e-07	0.000102
GO molecular function complete	postsynaptic neurotransmitter receptor activity (GO:0098960)	65	25	10.29	2.43	0.000523	0.0327
GO molecular function complete	neurotransmitter receptor activity (GO:0030594)	89	34	14.08	2.41	5.21e-05	0.00444
GO molecular function complete	potassium ion transmembrane transporter activity (GO:0015079)	149	54	23.58	2.29	8.95e-07	0.000145
GO molecular function complete	voltage-gated ion channel activity (GO:0005244)	179	64	28.32	2.26	1.42e-07	3.49e-05
GO molecular function complete	voltage-gated channel activity (GO:0022832)	180	64	28.48	2.25	1.56e-07	3.48e-05
GO molecular function complete	G protein-coupled receptor activity (GO:0004930)	361	127	57.12	2.22	2.29e-13	1.79e-10
GO molecular function complete	peptide receptor activity (GO:0001653)	133	44	21.05	2.09	6.03e-05	0.00496
GO molecular function complete	G protein-coupled peptide receptor activity (GO:0008528)	127	41	20.1	2.04	0.000165	0.0119
GO molecular function complete	gated channel activity (GO:0022836)	311	97	49.21	1.97	3.26e-08	8.99e-06
GO molecular function complete	cation channel activity (GO:0005261)	306	91	48.42	1.88	4.19e-07	7.85e-05
GO molecular function complete	transmembrane signaling receptor activity (GO:0004888)	756	217	119.63	1.81	5.41e-14	6.34e-11
GO molecular function complete	ion channel activity (GO:0005216)	400	109	63.3	1.72	1.16e-06	0.000175
GO molecular function complete	passive transmembrane transporter activity (GO:0022803)	440	119	69.62	1.71	5.1e-07	9.19e-05
GO molecular function complete	DNA-binding transcription factor activity, RNA polymerase II-specific (GO:0000981)	966	260	152.86	1.7	8.11e-14	7.6e-11
GO molecular function complete	channel activity (GO:0015267)	439	118	69.47	1.7	9.02e-07	0.000141
GO molecular function complete	DNA-binding transcription repressor activity, RNA polymerase II-specific (GO:0001227)	250	67	39.56	1.69	0.00026	0.0177
GO molecular function complete	DNA-binding transcription repressor activity (GO:0001217)	251	67	39.72	1.69	0.000268	0.0179
GO molecular function complete	receptor regulator activity (GO:0030545)	470	125	74.37	1.68	5.86e-07	0.000102
GO molecular function complete	metal ion transmembrane transporter activity (GO:0046873)	411	109	65.04	1.68	3.83e-06	0.000543
GO molecular function complete	signaling receptor activity (GO:0038023)	965	251	152.7	1.64	4.44e-12	2.31e-09
GO molecular function complete	molecular transducer activity (GO:0060089)	974	252	154.12	1.64	7.08e-12	3.32e-09
GO molecular function complete	signaling receptor activator activity (GO:0030546)	431	111	68.2	1.63	8.45e-06	0.00099
GO molecular function complete	monovalent inorganic cation transmembrane transporter activity (GO:0015077)	374	96	59.18	1.62	4.2e-05	0.00372
GO molecular function complete	receptor ligand activity (GO:0048018)	426	108	67.41	1.6	2.29e-05	0.00223
GO molecular function complete	DNA-binding transcription activator activity (GO:0001216)	428	107	67.73	1.58	4.1e-05	0.00385
GO molecular function complete	DNA-binding transcription activator activity, RNA polymerase II-specific (GO:0001228)	425	106	67.25	1.58	5.06e-05	0.00439
GO molecular function complete	inorganic cation transmembrane transporter activity (GO:0022890)	564	138	89.25	1.55	7.13e-06	0.000903
GO molecular function complete	cation transmembrane transporter activity (GO:0008324)	606	148	95.89	1.54	3.99e-06	0.00055
GO molecular function complete	inorganic molecular entity transmembrane transporter activity (GO:0015318)	777	179	122.95	1.46	8.56e-06	0.000979
GO molecular function complete	DNA-binding transcription factor activity (GO:0003700)	1215	278	192.26	1.45	2.54e-08	7.44e-06
GO molecular function complete	RNA polymerase II regulatory region sequence-specific DNA binding (GO:0000977)	800	183	126.59	1.45	9.04e-06	0.00101
GO molecular function complete	RNA polymerase II regulatory region DNA binding (GO:0001012)	807	184	127.7	1.44	9.81e-06	0.00107
GO molecular function complete	Unclassified (UNCLASSIFIED)	1883	429	297.96	1.44	2.65e-12	1.55e-09
GO molecular function complete	transcription regulatory region sequence-specific DNA binding (GO:0000976)	846	192	133.87	1.43	8.02e-06	0.000964
GO molecular function complete	ion transmembrane transporter activity (GO:0015075)	831	188	131.5	1.43	1.28e-05	0.00136
GO molecular function complete	cis-regulatory region binding (GO:0035326)	618	139	97.79	1.42	0.000236	0.0165
GO molecular function complete	sequence-specific DNA binding (GO:0043565)	1152	259	182.29	1.42	3.15e-07	6.16e-05
GO molecular function complete	cis-regulatory region sequence-specific DNA binding (GO:0000987)	612	137	96.84	1.41	0.000277	0.0183
GO molecular function complete	RNA polymerase II cis-regulatory region sequence-specific DNA binding (GO:0000978)	590	131	93.36	1.4	0.000601	0.0366
GO molecular function complete	transmembrane transporter activity (GO:0022857)	1001	221	158.4	1.4	7.6e-06	0.000938
GO molecular function complete	sequence-specific double-stranded DNA binding (GO:1990837)	891	196	140.99	1.39	3.49e-05	0.00334
GO molecular function complete	transcription regulatory region DNA binding (GO:0044212)	954	207	150.96	1.37	4.13e-05	0.0038
GO molecular function complete	regulatory region nucleic acid binding (GO:0001067)	955	207	151.12	1.37	4.18e-05	0.00377
GO molecular function complete	double-stranded DNA binding (GO:0003690)	981	201	155.23	1.29	0.000774	0.0465
GO molecular function complete	transporter activity (GO:0005215)	1156	236	182.92	1.29	0.000317	0.0206
GO molecular function complete	transcription regulator activity (GO:0140110)	1611	324	254.92	1.27	5.39e-05	0.00451
GO cellular component complete	T cell receptor complex (GO:0042101)	106	79	16.77	4.71	2.46e-22	4.91e-20
GO cellular component complete	photoreceptor disc membrane (GO:0097381)	19	13	3.01	4.32	0.000153	0.00313
GO cellular component complete	integral component of postsynaptic density membrane (GO:0099061)	51	26	8.07	3.22	5.82e-06	0.000174
GO cellular component complete	intrinsic component of postsynaptic density membrane (GO:0099146)	55	27	8.7	3.1	6.64e-06	0.000195
GO cellular component complete	plasma membrane signaling receptor complex (GO:0098802)	273	126	43.2	2.92	1.27e-20	1.81e-18
GO cellular component complete	photoreceptor outer segment (GO:0001750)	86	38	13.61	2.79	1e-06	3.71e-05
GO cellular component complete	voltage-gated potassium channel complex (GO:0008076)	83	36	13.13	2.74	2.55e-06	8.21e-05
GO cellular component complete	integral component of postsynaptic specialization membrane (GO:0099060)	74	32	11.71	2.73	1.08e-05	0.000299
GO cellular component complete	intrinsic component of postsynaptic specialization membrane (GO:0098948)	78	33	12.34	2.67	9.64e-06	0.000275
GO cellular component complete	neurotransmitter receptor complex (GO:0098878)	50	21	7.91	2.65	0.0004	0.00701
GO cellular component complete	postsynaptic density membrane (GO:0098839)	98	41	15.51	2.64	1.21e-06	4.32e-05
GO cellular component complete	potassium channel complex (GO:0034705)	94	38	14.87	2.55	4.97e-06	0.000151
GO cellular component complete	ionotropic glutamate receptor complex (GO:0008328)	48	19	7.6	2.5	0.00182	0.0257
GO cellular component complete	9+0 non-motile cilium (GO:0097731)	131	49	20.73	2.36	1.66e-06	5.71e-05
GO cellular component complete	postsynaptic specialization membrane (GO:0099634)	124	46	19.62	2.34	4.6e-06	0.000142
GO cellular component complete	photoreceptor inner segment (GO:0001917)	54	20	8.54	2.34	0.00199	0.0276
GO cellular component complete	photoreceptor cell cilium (GO:0097733)	114	42	18.04	2.33	1.04e-05	0.000292
GO cellular component complete	receptor complex (GO:0043235)	476	175	75.32	2.32	1.4e-19	1.76e-17
GO cellular component complete	integral component of postsynaptic membrane (GO:0099055)	118	43	18.67	2.3	1.36e-05	0.000367
GO cellular component complete	intrinsic component of postsynaptic membrane (GO:0098936)	124	44	19.62	2.24	1.36e-05	0.000363
GO cellular component complete	non-motile cilium (GO:0097730)	152	53	24.05	2.2	2.97e-06	9.42e-05
GO cellular component complete	cation channel complex (GO:0034703)	210	72	33.23	2.17	1.01e-07	4.47e-06
GO cellular component complete	plasma membrane protein complex (GO:0098797)	634	213	100.32	2.12	7.15e-20	9.53e-18
GO cellular component complete	integral component of synaptic membrane (GO:0099699)	153	50	24.21	2.07	3.07e-05	0.000739
GO cellular component complete	ion channel complex (GO:0034702)	286	92	45.26	2.03	2.24e-08	1.15e-06
GO cellular component complete	intrinsic component of synaptic membrane (GO:0099240)	166	53	26.27	2.02	2.57e-05	0.000627
GO cellular component complete	transmembrane transporter complex (GO:1902495)	309	97	48.9	1.98	2.04e-08	1.07e-06
GO cellular component complete	transporter complex (GO:1990351)	317	97	50.16	1.93	6.34e-08	2.95e-06
GO cellular component complete	postsynaptic membrane (GO:0045211)	275	84	43.52	1.93	5.27e-07	2.07e-05
GO cellular component complete	presynaptic membrane (GO:0042734)	155	44	24.53	1.79	0.00118	0.0181
GO cellular component complete	synaptic membrane (GO:0097060)	379	105	59.97	1.75	1.18e-06	4.27e-05
GO cellular component complete	integral component of plasma membrane (GO:0005887)	1504	372	237.99	1.56	8.55e-15	7.77e-13
GO cellular component complete	nuclear chromatin (GO:0000790)	976	239	154.44	1.55	2.39e-09	1.41e-07
GO cellular component complete	intrinsic component of plasma membrane (GO:0031226)	1580	384	250.02	1.54	2.32e-14	1.93e-12
GO cellular component complete	postsynaptic density (GO:0014069)	338	81	53.48	1.51	0.00117	0.0181
GO cellular component complete	neuron to neuron synapse (GO:0098984)	368	88	58.23	1.51	0.000699	0.0115
GO cellular component complete	asymmetric synapse (GO:0032279)	344	82	54.43	1.51	0.00128	0.0189
GO cellular component complete	postsynaptic specialization (GO:0099572)	363	85	57.44	1.48	0.00168	0.024
GO cellular component complete	neuronal cell body (GO:0043025)	511	114	80.86	1.41	0.00111	0.0174
GO cellular component complete	membrane protein complex (GO:0098796)	1229	272	194.47	1.4	4.53e-07	1.81e-05
GO cellular component complete	postsynapse (GO:0098794)	629	139	99.53	1.4	0.000403	0.00701
GO cellular component complete	chromatin (GO:0000785)	1146	252	181.34	1.39	2.24e-06	7.35e-05
GO cellular component complete	cell body (GO:0044297)	581	126	91.94	1.37	0.00147	0.0213
GO cellular component complete	nuclear chromosome (GO:0000228)	1199	250	189.73	1.32	6.02e-05	0.0014
GO cellular component complete	neuron projection (GO:0043005)	1312	273	207.61	1.31	3.24e-05	0.000772
GO cellular component complete	integral component of membrane (GO:0016021)	4859	970	768.88	1.26	1.47e-14	1.28e-12
GO cellular component complete	plasma membrane (GO:0005886)	4898	974	775.05	1.26	3.36e-14	2.69e-12
GO cellular component complete	intrinsic component of membrane (GO:0031224)	5004	990	791.82	1.25	5.72e-14	4.4e-12
GO cellular component complete	cell periphery (GO:0071944)	5023	988	794.83	1.24	2.33e-13	1.67e-11
GO cellular component complete	synapse (GO:0045202)	1305	253	206.5	1.23	0.00243	0.0329

## Sheet: Table S2D
Supplemental Table S2D. GO enrichment for RAMPAGE-only genes
GO Ontology database (Released 2020-03-23)	PANTHER Overrepresentation Test (Released 20200407)
RAMPAGE-only Genes
GO category	GO term	# background	# observed	# expected	Fold enrichment	p-value	FDR
GO biological process complete	leukotriene D4 biosynthetic process (GO:1901750)	7	4	0.1	42.02	9.69e-06	0.00265
GO biological process complete	leukotriene D4 metabolic process (GO:1901748)	7	4	0.1	42.02	9.69e-06	0.00261
GO biological process complete	glutathione catabolic process (GO:0006751)	9	4	0.12	32.68	2.05e-05	0.0046
GO biological process complete	leukotriene biosynthetic process (GO:0019370)	18	4	0.24	16.34	0.000191	0.0292
GO biological process complete	opsonization (GO:0008228)	60	9	0.82	11.03	3.41e-07	0.000187
GO biological process complete	immunoglobulin production (GO:0002377)	133	17	1.81	9.4	1.87e-11	4.23e-08
GO biological process complete	keratinization (GO:0031424)	153	17	2.08	8.17	1.39e-10	2.2e-07
GO biological process complete	production of molecular mediator of immune response (GO:0002440)	156	17	2.12	8.01	1.83e-10	2.64e-07
GO biological process complete	peptide cross-linking (GO:0018149)	84	9	1.14	7.88	4.38e-06	0.00148
GO biological process complete	regulation of complement activation (GO:0030449)	103	11	1.4	7.85	3.86e-07	0.000191
GO biological process complete	regulation of humoral immune response (GO:0002920)	120	12	1.63	7.35	2.18e-07	0.000133
GO biological process complete	keratinocyte differentiation (GO:0030216)	195	17	2.65	6.41	4.25e-09	4.82e-06
GO biological process complete	complement activation, classical pathway (GO:0006958)	122	10	1.66	6.03	1.17e-05	0.00305
GO biological process complete	immune response-regulating cell surface receptor signaling pathway involved in phagocytosis (GO:0002433)	122	10	1.66	6.03	1.17e-05	0.003
GO biological process complete	Fc-gamma receptor signaling pathway involved in phagocytosis (GO:0038096)	122	10	1.66	6.03	1.17e-05	0.00295
GO biological process complete	Fc receptor mediated stimulatory signaling pathway (GO:0002431)	124	10	1.69	5.93	1.34e-05	0.00317
GO biological process complete	complement activation (GO:0006956)	137	11	1.86	5.9	5.13e-06	0.0017
GO biological process complete	Fc-gamma receptor signaling pathway (GO:0038094)	126	10	1.71	5.84	1.52e-05	0.00355
GO biological process complete	humoral immune response mediated by circulating immunoglobulin (GO:0002455)	127	10	1.73	5.79	1.62e-05	0.00373
GO biological process complete	epidermal cell differentiation (GO:0009913)	238	17	3.24	5.25	6.59e-08	5.23e-05
GO biological process complete	negative regulation of inflammatory response to antigenic stimulus (GO:0002862)	183	12	2.49	4.82	1.33e-05	0.0032
GO biological process complete	regulation of inflammatory response to antigenic stimulus (GO:0002861)	196	12	2.67	4.5	2.53e-05	0.0055
GO biological process complete	immunoglobulin mediated immune response (GO:0016064)	164	10	2.23	4.48	0.000124	0.0205
GO biological process complete	B cell mediated immunity (GO:0019724)	167	10	2.27	4.4	0.000142	0.0224
GO biological process complete	skin development (GO:0043588)	304	17	4.13	4.11	1.69e-06	0.000687
GO biological process complete	receptor-mediated endocytosis (GO:0006898)	222	12	3.02	3.97	7.94e-05	0.0143
GO biological process complete	epidermis development (GO:0008544)	342	18	4.65	3.87	1.88e-06	0.000748
GO biological process complete	lymphocyte mediated immunity (GO:0002449)	218	11	2.96	3.71	0.000277	0.039
GO biological process complete	adaptive immune response based on somatic recombination of immune receptors built from immunoglobulin superfamily domains (GO:0002460)	226	11	3.07	3.58	0.000371	0.0492
GO biological process complete	adaptive immune response (GO:0002250)	503	20	6.84	2.92	2.75e-05	0.00582
GO molecular function complete	glutathione hydrolase activity (GO:0036374)	7	4	0.1	42.02	9.69e-06	0.00649
GO molecular function complete	omega peptidase activity (GO:0008242)	14	4	0.19	21.01	8.34e-05	0.0355
GO cellular component complete	keratin filament (GO:0045095)	68	11	0.92	11.9	8.18e-09	1.17e-06
GO cellular component complete	immunoglobulin complex (GO:0019814)	134	18	1.82	9.88	2.19e-12	4.39e-10
GO cellular component complete	intermediate filament (GO:0005882)	162	15	2.2	6.81	1.69e-08	2.11e-06
GO cellular component complete	blood microparticle (GO:0072562)	130	11	1.77	6.22	3.21e-06	0.000305
GO cellular component complete	intermediate filament cytoskeleton (GO:0045111)	196	16	2.67	6	2.9e-08	3.41e-06
