# Supplementary material for: Integration of high-resolution promoter profiling assays reveals novel, cell type–specific transcription start sites across 115 human cell and tissue types
Source: HighWire-hosted journal article supplement (doi:10.1101/gr.275723.121), 2021-12-23
Supplement: Supplemental_Table_S3.xlsx [file Supplemental_Table_S3.xlsx]

## Sheet: Contents
Supplemental Table S3. Assignment of rPeaks to genes
Supplemental Table S3A	Summary of rPeak gene assignments
Supplemental Table S3B	Verified GENCODE TSSs
Supplemental Table S3C	Verified unannotated TSSs
Supplemental Table S3D	Biosample enrichment of verified unannotated TSSs
Supplemental Table S3E	Candidate GENCODE TSSs
Supplemental Table S3F	Unannotated transcript TSSs
Supplemental Table S3G	Comparison across GENCODE versions

## Sheet: Table S3A
Supplemental Table S3A. Summary of rPeak gene assignments
Catagory	Genomic context of rPeaks	Genomic context of the 3´end of the supporting read pairs	Counts
Verified GENCODE TSS	TSS overlapping	Exon of the TSS's GENCODE gene	19821
Verified unannotated TSS	TSS overlapping	Exon of another GENCODE gene	636
	TSS proximal	Exon of the nearest TSS's GENCODE gene	6297
	TSS proximal	Exon of another GENCODE gene	1509
	Exon-1	Another exon of the exon's GENCODE gene	288
	Exon-1	Exon of another GENCODE gene	103
	Intron	Exon of the overlapping GENCODE gene	6020
	Intron	Exon of another GENCODE gene	458
	Intergenic	Exon of the nearest TSS's GENCODE gene	1143
	Intergenic	Exon of another GENCODE gene	1043
Candidate GENCODE TSS	TSS overlapping	Single exon or long 5´UTR of the TSS's GENCODE gene	457
	TSS proximal		492
	Exon-1		156
Unannotated transcript TSS	TSS overlapping	Exon not annoted in GENCODE	310
	TSS proximal		974
	Exon-1		45
	Intron		1096
	Intergenic		1705
Local transcription	TSS overlapping	3' end < 1 kb	54
	TSS proximal		489
	Exon-1		1
	Intron		1737
	Intergenic		1067
Discarded	Exon > 1	5' end overlaps exon 2 or greater	6641
	Intron	3' end > 500 kb away	2
	Intergenic	3' end > 500 kb away	2

## Sheet: Table S3B
Supplemental Table S3B. Verified TSSs of GENCODE transcripts
rPeak ID	Genomic context	Linked genes (GENCODE ID)	Linked genes (Common name)	Gene class	% verified TSS reads	# reads map to GENCODE exon	# read map to novel transcript	# local transcription reads	# artifact reads
ZH38T0011491	TSS	ENSG00000111057.11	KRT18	protein_coding	1	3632	0	0	0
ZH38T0038153	TSS	ENSG00000137460.8	FHDC1	protein_coding	1	2507	0	0	0
ZH38T0052173	TSS	ENSG00000131721.5	RHOXF2	protein_coding	1	2139	0	0	0
ZH38T0025894	TSS	ENSG00000105492.16	SIGLEC6	protein_coding	1	1946	0	0	0
ZH38T0005512	TSS	ENSG00000107863.18	ARHGAP21	protein_coding	1	940	0	0	0
ZH38T0026299	TSS	ENSG00000269600.2	AC016629.2	lncRNA	1	582	0	0	0
ZH38T0002968	TSS	ENSG00000182898.4	TCHHL1	protein_coding	1	359	0	0	0
ZH38T0043458	TSS	ENSG00000123500.10	COL10A1	protein_coding	1	358	0	0	0
ZH38T0026058	TSS	ENSG00000167634.12	NLRP7	protein_coding	1	336	0	0	0
ZH38T0049475	TSS	ENSG00000229697.2	FAM242E	lncRNA	1	298	0	0	0
ZH38T0035124	TSS	ENSG00000239921.4	LINC01471	lncRNA	1	221	0	0	0
ZH38T0052640	TSS	ENSG00000270073.1	TSPY6P	unprocessed_pseudogene	1	205	0	0	0
ZH38T0020531	TSS	ENSG00000196535.16	MYO18A	protein_coding	0.999719	213327	45	15	0
ZH38T0031235	TSS	ENSG00000171940.13	ZNF217	protein_coding	0.999688	12829	2	2	0
ZH38T0034099	TSS	ENSG00000177352.10	CCDC71	protein_coding	0.999688	35207	6	5	0
ZH38T0048741	TSS	ENSG00000261150.2	EPPK1	protein_coding	0.999622	5286	2	0	0
ZH38T0044355	TSS	ENSG00000136213.10	CHST12	protein_coding	0.999611	15436	4	2	0
ZH38T0018845	TSS	ENSG00000245694.10	CRNDE	lncRNA	0.99952	24976	12	0	0
ZH38T0009746	TSS	ENSG00000109846.8	CRYAB	protein_coding	0.999459	144153	51	27	0
ZH38T0007639	TSS	ENSG00000177105.10	RHOG	protein_coding	0.999423	34636	4	15	1
ZH38T0038632	TSS	ENSG00000171421.13	MRPL36	protein_coding	0.999413	398097	114	120	0
ZH38T0030575	TSS	ENSG00000125812.16	GZF1	protein_coding	0.999348	50579	27	5	1
ZH38T0027750	TSS	ENSG00000152291.14	TGOLN2	protein_coding	0.999336	1457744	4	964	0
ZH38T0033460	TSS	ENSG00000163520.14	FBLN2	protein_coding	0.999324	68032	36	8	2
ZH38T0003350	TSS	ENSG00000143320.9	CRABP2	protein_coding	0.999317	5856	0	4	0
ZH38T0046770	TSS	ENSG00000164897.14	TMUB1	protein_coding	0.999271	46581	8	26	0
ZH38T0018804	TSS	ENSG00000083799.17	CYLD	protein_coding	0.999253	883320	270	385	5
ZH38T0000177	TSS	ENSG00000116251.11, ENSG00000285629.1	RPL22 , AL031847.2	protein_coding, protein_coding	0.999217	86767	46	22	0
ZH38T0050857	TSS	ENSG00000182154.8	MRPL41	protein_coding	0.999154	30716	13	13	0
ZH38T0002984	TSS	ENSG00000159455.8	LCE2B	protein_coding	0.999105	2232	1	0	1
ZH38T0047559	TSS	ENSG00000083168.11	KAT6A	protein_coding	0.99907	171855	10	150	0
ZH38T0036394	TSS	ENSG00000109685.18	NSD2	protein_coding	0.99904	7281	7	0	0
ZH38T0032346	TSS	ENSG00000211668.2	IGLV2-11	IG_V_gene	0.99894	11305	5	7	0
ZH38T0051920	TSS	ENSG00000184905.9	TCEAL2	protein_coding	0.9989	218026	118	122	0
ZH38T0022377	TSS	ENSG00000225663.7	MCRIP1	protein_coding	0.998882	466548	516	6	0
ZH38T0018746	TSS	ENSG00000261217.2	BCAP31P1	unprocessed_pseudogene	0.998843	863	0	1	0
ZH38T0052434	TSS	ENSG00000221867.9	MAGEA3	protein_coding	0.998825	17008	4	16	0
ZH38T0038491	TSS	ENSG00000164323.14	CFAP97	protein_coding	0.998808	110582	8	122	2
ZH38T0019247	TSS	ENSG00000261701.7	HPR	protein_coding	0.998802	17514	21	0	0
ZH38T0039979	TSS	ENSG00000164902.14	PHAX	protein_coding	0.998788	145087	66	110	0
ZH38T0031258	TSS	ENSG00000101132.10	PFDN4	protein_coding	0.998747	117957	139	8	1
ZH38T0032079	TSS	ENSG00000142173.15	COL6A2	protein_coding	0.99874	529530	622	46	0
ZH38T0031016	TSS	ENSG00000168703.5	WFDC12	protein_coding	0.998703	770	1	0	0
ZH38T0005020	TSS	ENSG00000179456.10	ZBTB18	protein_coding	0.998698	1534	2	0	0
ZH38T0024634	TSS	ENSG00000105711.12	SCN1B	protein_coding	0.99866	17890	18	6	0
ZH38T0009188	TSS	ENSG00000110195.13	FOLR1	protein_coding	0.998581	3519	1	4	0
ZH38T0031020	TSS	ENSG00000124233.12	SEMG1	protein_coding	0.998578	2107	0	3	0
ZH38T0015594	TSS	ENSG00000089737.17	DDX24	protein_coding	0.998562	635505	310	605	0
ZH38T0052417	TSS	ENSG00000029993.15	HMGB3	protein_coding	0.998555	264059	373	9	0
ZH38T0008960	TSS	ENSG00000175334.8	BANF1	protein_coding	0.998483	55282	7	77	0
ZH38T0041174	TSS	ENSG00000161055.4	SCGB3A1	protein_coding	0.998478	11812	1	17	0
ZH38T0031436	TSS	ENSG00000197114.11	ZGPAT	protein_coding	0.998453	108428	140	28	0
ZH38T0043353	TSS	ENSG00000112365.4	ZBTB24	protein_coding	0.998445	10912	1	16	0
ZH38T0036202	TSS	ENSG00000172061.8	LRRC15	protein_coding	0.998425	1268	2	0	0
ZH38T0032328	TSS	ENSG00000211655.3, ENSG00000211677.2, ENSG00000211679.2, ENSG00000254709.7	IGLV1-36 , IGLC2 , IGLC3 , IGLL5	IG_V_gene, IG_C_gene, IG_C_gene, protein_coding	0.998409	1255	0	2	0
ZH38T0014304	TSS	ENSG00000169385.3	RNASE2	protein_coding	0.99838	4313	0	7	0
ZH38T0039330	TSS	ENSG00000152939.17	MARVELD2	protein_coding	0.998356	30963	6	45	0
ZH38T0014622	TSS	ENSG00000100852.13	ARHGAP5	protein_coding	0.998348	74956	16	108	0
ZH38T0051261	TSS	ENSG00000099399.6	MAGEB2	protein_coding	0.998323	11308	3	16	0
ZH38T0033817	TSS	ENSG00000188846.13	RPL14	protein_coding	0.998316	1262805	1659	471	0
ZH38T0020225	TSS	ENSG00000170315.13	UBB	protein_coding	0.998254	258472	148	304	0
ZH38T0031756	TSS	ENSG00000225555.2	AP000320.1	lncRNA	0.998249	1140	2	0	0
ZH38T0024387	TSS	ENSG00000105701.16	FKBP8	protein_coding	0.998185	389328	615	93	0
ZH38T0002971	TSS	ENSG00000215853.3	RPTN	protein_coding	0.998141	1074	0	2	0
ZH38T0017776	TSS	ENSG00000172236.17	TPSAB1	protein_coding	0.998127	18122	0	32	2
ZH38T0013198	TSS	ENSG00000173141.5	MRPL57	protein_coding	0.998125	188439	12	342	0
ZH38T0023841	TSS	ENSG00000133246.12	PRAM1	protein_coding	0.998069	2068	0	4	0
ZH38T0022368	TSS	ENSG00000185527.12	AC139530.1	protein_coding	0.997978	1974	0	4	0
ZH38T0026126	TSS	ENSG00000108107.14	RPL28	protein_coding	0.997924	69689	0	145	0
ZH38T0020640	TSS	ENSG00000005156.11	LIG3	protein_coding	0.99792	95934	108	90	2
ZH38T0019809	TSS	ENSG00000185245.8	GP1BA	protein_coding	0.997912	956	0	2	0
ZH38T0032776	TSS	ENSG00000128283.7	CDC42EP1	protein_coding	0.997904	11901	23	2	0
ZH38T0022210	TSS	ENSG00000108639.7	SYNGR2	protein_coding	0.9979	129232	168	104	0
ZH38T0051834	TSS	ENSG00000183035.12	CYLC1	protein_coding	0.997868	936	0	2	0
ZH38T0046141	TSS	ENSG00000287592.1	AC073348.2	lncRNA	0.997847	4171	3	5	1
ZH38T0051922	TSS	ENSG00000204071.10	TCEAL6	protein_coding	0.997843	21747	3	44	0
ZH38T0050709	TSS	ENSG00000169925.16	BRD3	protein_coding	0.997787	28859	61	3	0
ZH38T0018116	TSS	ENSG00000189067.12	LITAF	protein_coding	0.997749	254408	539	35	0
ZH38T0043667	TSS	ENSG00000079819.19	EPB41L2	protein_coding	0.997698	1175168	192	2520	0
ZH38T0045302	TSS	ENSG00000182487.12	NCF1B	transcribed_unprocessed_pseudogene	0.997658	10224	24	0	0
ZH38T0005787	TSS	ENSG00000165512.5	ZNF22	protein_coding	0.997611	79338	188	1	1
ZH38T0044331	TSS	ENSG00000157778.8	PSMG3	protein_coding	0.997562	22504	44	11	0
ZH38T0000848	TSS	ENSG00000175707.9	KDF1	protein_coding	0.997498	17542	24	20	0
ZH38T0046664	TSS	ENSG00000050327.15	ARHGEF5	protein_coding	0.997469	3153	5	3	0
ZH38T0048660	TSS	ENSG00000234616.8	JRK	protein_coding	0.99743	107106	135	141	0
ZH38T0023899	TSS	ENSG00000267673.6	FDX2	protein_coding	0.997423	10450	1	26	0
ZH38T0027879	TSS	ENSG00000228325.5, ENSG00000239819.2, ENSG00000242580.1, ENSG00000251546.1	IGKV3D-7 , IGKV1D-8 , IGKV1D-43 , IGKV1D-39	IG_V_gene, IG_V_gene, IG_V_gene, IG_V_gene	0.997403	384	0	1	0
ZH38T0038671	TSS	ENSG00000247516.8	MIR4458HG	lncRNA	0.997397	103476	15	255	0
ZH38T0003025	TSS	ENSG00000203783.5	PRR9	protein_coding	0.997357	2642	0	7	0
ZH38T0048686	TSS	ENSG00000160932.11	LY6E	protein_coding	0.997344	1780289	3341	1400	0
ZH38T0018117	TSS	ENSG00000189067.12	LITAF	protein_coding	0.997338	13863	18	19	0
ZH38T0031421	TSS	ENSG00000101210.12	EEF1A2	protein_coding	0.997326	91760	221	25	0
ZH38T0017703	TSS	ENSG00000188536.13	HBA2	protein_coding	0.997318	32718	2	74	12
ZH38T0018706	TSS	ENSG00000103507.14	BCKDK	protein_coding	0.997267	93415	173	82	1
ZH38T0018255	TSS	ENSG00000134419.15	RPS15A	protein_coding	0.997259	28381	13	65	0
ZH38T0045059	TSS	ENSG00000196262.14	PPIA	protein_coding	0.997236	1307990	1090	2515	20
ZH38T0045929	TSS	ENSG00000106436.6	MYL10	protein_coding	0.997191	1065	3	0	0
ZH38T0003044	TSS	ENSG00000188015.10	S100A3	protein_coding	0.997169	3522	3	7	0
ZH38T0036509	TSS	ENSG00000109519.13	GRPEL1	protein_coding	0.997166	167474	343	133	0
ZH38T0028963	TSS	ENSG00000172845.15	SP3	protein_coding	0.997155	23835	3	65	0
ZH38T0008648	TSS	ENSG00000255432.1, ENSG00000278615.4	AP001458.2 , C11orf98	protein_coding, protein_coding	0.997122	379440	276	819	0
ZH38T0030299	TSS	ENSG00000198326.9	TMEM239	protein_coding	0.997082	3075	0	9	0
ZH38T0013119	TSS	ENSG00000183495.13	EP400	protein_coding	0.997056	19644	28	30	0
ZH38T0023616	TSS	ENSG00000167674.15	HDGFL2	protein_coding	0.99705	84484	56	194	0
ZH38T0020722	TSS	ENSG00000276023.5	DUSP14	protein_coding	0.996994	35158	105	1	0
ZH38T0000041	TSS	ENSG00000078808.17	SDF4	protein_coding	0.996975	251142	294	468	0
ZH38T0021975	TSS	ENSG00000141219.15	C17orf80	protein_coding	0.996885	28482	18	70	1
ZH38T0007686	TSS	ENSG00000166313.19	APBB1	protein_coding	0.996872	115686	51	312	0
ZH38T0021139	TSS	ENSG00000131096.10	PYY	protein_coding	0.996847	2213	1	6	0
ZH38T0002775	TSS	ENSG00000150337.13	FCGR1A	protein_coding	0.99681	5625	4	14	0
ZH38T0022573	TSS	ENSG00000198081.11	ZBTB14	protein_coding	0.9968	3738	10	2	0
ZH38T0032259	TSS	ENSG00000099937.11	SERPIND1	protein_coding	0.996793	7460	4	20	0
ZH38T0039536	TSS	ENSG00000186468.13	RPS23	protein_coding	0.996775	4430315	2107	12214	14
ZH38T0003011	TSS	ENSG00000163216.7	SPRR2D	protein_coding	0.99676	6460	2	19	0
ZH38T0051925	TSS	ENSG00000184515.11	BEX5	protein_coding	0.99675	67171	24	195	0
ZH38T0035210	TSS	ENSG00000170893.4	TRH	protein_coding	0.996711	14544	2	44	2
ZH38T0021976	TSS	ENSG00000141219.15	C17orf80	protein_coding	0.996581	107544	51	312	6
ZH38T0027884	TSS	ENSG00000224041.3, ENSG00000228325.5	IGKV3D-15 , IGKV3D-7	IG_V_gene, IG_V_gene	0.996546	577	0	2	0
ZH38T0010544	TSS	ENSG00000111678.11	C12orf57	protein_coding	0.996523	367161	32	1249	0
ZH38T0050022	TSS	ENSG00000136891.14	TEX10	protein_coding	0.996499	78848	79	198	0
ZH38T0048728	TSS	ENSG00000180921.7	FAM83H	protein_coding	0.996486	9359	22	11	0
ZH38T0018724	TSS	ENSG00000156885.6	COX6A2	protein_coding	0.996472	118626	7	413	0
ZH38T0017711	TSS	ENSG00000086506.3	HBQ1	protein_coding	0.996451	5896	7	14	0
ZH38T0021308	TSS	ENSG00000082641.16	NFE2L1	protein_coding	0.996439	486894	12	1728	0
ZH38T0011270	TSS	ENSG00000167531.6	LALBA	protein_coding	0.996396	553	1	1	0
ZH38T0002270	TSS	ENSG00000162631.18	NTNG1	protein_coding	0.996392	3038	1	10	0
ZH38T0024861	TSS	ENSG00000011332.19	DPF1	protein_coding	0.996389	30627	63	48	0
ZH38T0020993	TSS	ENSG00000184502.4	GAST	protein_coding	0.996365	2193	0	8	0
ZH38T0035803	TSS	ENSG00000008952.17	SEC62	protein_coding	0.996347	594664	934	1244	2
ZH38T0039470	TSS	ENSG00000171530.14	TBCA	protein_coding	0.996338	3858888	6810	7374	0
ZH38T0010025	TSS	ENSG00000181264.8	TMEM136	protein_coding	0.996264	30402	114	0	0
ZH38T0032345	TSS	ENSG00000211666.2, ENSG00000211677.2, ENSG00000211679.2, ENSG00000254709.7	IGLV2-14 , IGLC2 , IGLC3 , IGLL5	IG_V_gene, IG_C_gene, IG_C_gene, protein_coding	0.99621	13667	44	8	0
ZH38T0002985	TSS	ENSG00000187173.4	LCE2A	protein_coding	0.996145	1809	2	5	0
ZH38T0039416	TSS	ENSG00000164346.10	NSA2	protein_coding	0.996106	191365	373	374	1
ZH38T0028438	TSS	ENSG00000136002.18	ARHGEF4	protein_coding	0.996101	5620	10	12	0
ZH38T0023608	TSS	ENSG00000008382.15	MPND	protein_coding	0.996098	2042	8	0	0
ZH38T0000025	TSS	ENSG00000187608.10	ISG15	protein_coding	0.996035	34667	4	134	0
ZH38T0048213	TSS	ENSG00000164924.18	YWHAZ	protein_coding	0.996031	12548	37	13	0
ZH38T0003012	TSS	ENSG00000163216.7, ENSG00000241794.2	SPRR2D , SPRR2A	protein_coding, protein_coding	0.996025	7266	0	29	0
ZH38T0000268	TSS	ENSG00000131686.15	CA6	protein_coding	0.996008	3992	16	0	0
ZH38T0012332	TSS	ENSG00000177889.10	UBE2N	protein_coding	0.996004	738792	315	2601	48
ZH38T0025876	TSS	ENSG00000186806.5	VSIG10L	protein_coding	0.995979	3715	0	15	0
ZH38T0019179	TSS	ENSG00000168802.13	CHTF8	protein_coding	0.99597	18537	72	3	0
ZH38T0017697	TSS	ENSG00000103152.11	MPG	protein_coding	0.995965	35047	132	10	0
ZH38T0008385	TSS	ENSG00000149131.15	SERPING1	protein_coding	0.99593	183530	158	592	0
ZH38T0032755	TSS	ENSG00000128311.14	TST	protein_coding	0.995865	4335	18	0	0
ZH38T0000178	TSS	ENSG00000116251.11	RPL22	protein_coding	0.99586	711454	747	2211	0
ZH38T0024160	TSS	ENSG00000104979.9	C19orf53	protein_coding	0.995846	5514	0	23	0
ZH38T0003063	TSS	ENSG00000160678.11	S100A1	protein_coding	0.99584	118260	70	424	0
ZH38T0024406	TSS	ENSG00000064607.17	SUGP2	protein_coding	0.995829	45840	153	39	0
ZH38T0005314	TSS	ENSG00000151461.20	UPF2	protein_coding	0.995825	263329	736	368	0
ZH38T0044695	TSS	ENSG00000172115.8	CYCS	protein_coding	0.995818	826554	411	3060	0
ZH38T0052439	TSS	ENSG00000197172.10	MAGEA6	protein_coding	0.995809	3802	0	16	0
ZH38T0051733	TSS	ENSG00000281852.1	LINC00891	lncRNA	0.995792	1893	8	0	0
ZH38T0050206	TSS	ENSG00000148229.13	POLE3	protein_coding	0.995791	191148	1	806	1
ZH38T0023426	TSS	ENSG00000115268.9	RPS15	protein_coding	0.995763	3495139	1710	13131	30
ZH38T0000063	TSS	ENSG00000205090.9	TMEM240	protein_coding	0.995682	1614	5	2	0
ZH38T0041275	TSS	ENSG00000124570.20	SERPINB6	protein_coding	0.995668	26202	63	51	0
ZH38T0027968	TSS	ENSG00000121152.10	NCAPH	protein_coding	0.995655	50181	108	111	0
ZH38T0024988	TSS	ENSG00000105202.9	FBL	protein_coding	0.9956	83277	109	259	0
ZH38T0042704	TSS	ENSG00000112759.18, ENSG00000262179.2	SLC29A1 , MYMX	protein_coding, protein_coding	0.995586	3158	0	14	0
ZH38T0027386	TSS	ENSG00000119862.13	LGALSL	protein_coding	0.995581	17572	59	19	0
ZH38T0003000	TSS	ENSG00000184148.4	SPRR4	protein_coding	0.995558	4482	9	11	0
ZH38T0023414	TSS	ENSG00000099622.14	CIRBP	protein_coding	0.995556	809214	3493	119	0
ZH38T0048674	TSS	ENSG00000197353.3	LYPD2	protein_coding	0.995547	9613	7	36	0
ZH38T0007373	TSS	ENSG00000184524.6	CEND1	protein_coding	0.995546	6929	27	4	0
ZH38T0042307	TSS	ENSG00000236104.3	ZBTB22	protein_coding	0.995541	893	0	4	0
ZH38T0021396	TSS	ENSG00000198740.8	ZNF652	protein_coding	0.99554	1116	4	1	0
ZH38T0048204	TSS	ENSG00000070756.16	PABPC1	protein_coding	0.995506	15727	61	10	0
ZH38T0002751	TSS	ENSG00000178104.19	PDE4DIP	protein_coding	0.995493	24738	96	16	0
ZH38T0017919	TSS	ENSG00000103363.14	ELOB	protein_coding	0.995453	1091541	3648	1335	3
ZH38T0047569	TSS	ENSG00000176209.11	SMIM19	protein_coding	0.995452	9192	42	0	0
ZH38T0015926	TSS	ENSG00000211890.4, ENSG00000211893.4, ENSG00000211895.5, ENSG00000211896.7, ENSG00000211898.7, ENSG00000211899.10, ENSG00000276775.1	IGHA2 , IGHG2 , IGHA1 , IGHG1 , IGHD , IGHM , IGHV4-4	IG_C_gene, IG_C_gene, IG_C_gene, IG_C_gene, IG_C_gene, IG_C_gene, IG_V_gene	0.9954	1731	6	2	0
ZH38T0051668	TSS	ENSG00000181191.11	PJA1	protein_coding	0.995293	215262	16	1002	0
ZH38T0030504	TSS	ENSG00000237282.3	LINC00851	lncRNA	0.99529	634	1	2	0
ZH38T0048678	TSS	ENSG00000180155.20	LYNX1	protein_coding	0.995225	18343	36	52	0
ZH38T0031059	TSS	ENSG00000101470.10	TNNC2	protein_coding	0.99522	106192	388	118	4
ZH38T0036501	TSS	ENSG00000132405.19	TBC1D14	protein_coding	0.995192	7038	7	27	0
ZH38T0052330	TSS	ENSG00000129680.16	MAP7D3	protein_coding	0.99519	342224	1492	162	0
ZH38T0008953	TSS	ENSG00000175550.8	DRAP1	protein_coding	0.995175	9076	1	43	0
ZH38T0032335	TSS	ENSG00000100121.13	GGTLC2	protein_coding	0.995169	412	2	0	0
ZH38T0002973	TSS	ENSG00000143631.10	FLG	protein_coding	0.995168	13181	4	60	0
ZH38T0042699	TSS	ENSG00000180992.7	MRPL14	protein_coding	0.995146	93899	292	166	0
ZH38T0048132	TSS	ENSG00000156467.9	UQCRB	protein_coding	0.99514	12696	23	39	0
ZH38T0017232	TSS	ENSG00000166426.8	CRABP1	protein_coding	0.995124	22450	14	94	2
ZH38T0004412	TSS	ENSG00000237605.2	AL591846.2	lncRNA	0.995098	203	0	1	0
ZH38T0000657	TSS	ENSG00000173372.17	C1QA	protein_coding	0.995057	124610	113	506	0
ZH38T0040115	TSS	ENSG00000213585.11	VDAC1	protein_coding	0.995033	20833	100	4	0
ZH38T0015609	TSS	ENSG00000186910.4	SERPINA11	protein_coding	0.995022	7596	4	34	0
ZH38T0042106	TSS	ENSG00000204472.13	AIF1	protein_coding	0.995018	6391	0	32	0
ZH38T0047571	TSS	ENSG00000176209.11	SMIM19	protein_coding	0.995012	232602	760	406	0
ZH38T0028056	TSS	ENSG00000115539.14	PDCL3	protein_coding	0.995009	132368	407	255	2
ZH38T0022397	TSS	ENSG00000141522.12	ARHGDIA	protein_coding	0.994976	514912	2580	20	0
ZH38T0048174	TSS	ENSG00000164919.11	COX6C	protein_coding	0.994945	3758496	14833	4235	28
ZH38T0018742	TSS	ENSG00000261127.2	AC133548.2	transcribed_processed_pseudogene	0.994937	393	2	0	0
ZH38T0031340	TSS	ENSG00000124172.10	ATP5F1E	protein_coding	0.994916	1699155	264	8418	0
ZH38T0024404	TSS	ENSG00000051128.19	HOMER3	protein_coding	0.994909	6253	31	1	0
ZH38T0015928	TSS	ENSG00000211893.4, ENSG00000211895.5, ENSG00000211896.7, ENSG00000211897.9, ENSG00000211898.7, ENSG00000211937.3	IGHG2 , IGHA1 , IGHG1 , IGHG3 , IGHD , IGHV2-5	IG_C_gene, IG_C_gene, IG_C_gene, IG_C_gene, IG_C_gene, IG_V_gene	0.994883	7000	5	31	0
ZH38T0014089	TSS	ENSG00000174405.13	LIG4	protein_coding	0.994865	29837	27	127	0
ZH38T0041276	TSS	ENSG00000124570.20	SERPINB6	protein_coding	0.994807	243270	875	395	0
ZH38T0010479	TSS	ENSG00000111642.15, ENSG00000285238.2	CHD4 , AC006064.6	protein_coding, protein_coding	0.994802	901621	1407	3304	0
ZH38T0050463	TSS	ENSG00000106992.19	AK1	protein_coding	0.994799	82442	396	34	1
ZH38T0017798	TSS	ENSG00000206053.13	JPT2	protein_coding	0.994799	241950	1205	45	15
ZH38T0030713	TSS	ENSG00000131061.14	ZNF341	protein_coding	0.994794	7261	38	0	0
ZH38T0042237	TSS	ENSG00000232080.5	AL662789.1	lncRNA	0.994752	2085	1	10	0
ZH38T0012855	TSS	ENSG00000170890.14	PLA2G1B	protein_coding	0.994715	31242	132	32	2
ZH38T0009124	TSS	ENSG00000255980.1	AP000439.3	lncRNA	0.994698	938	0	5	0
ZH38T0029591	TSS	ENSG00000138375.12	SMARCAL1	protein_coding	0.994696	9002	22	26	0
ZH38T0008921	TSS	ENSG00000173039.19	RELA	protein_coding	0.994696	258028	784	592	0
ZH38T0008378	TSS	ENSG00000134809.9	TIMM10	protein_coding	0.994686	254764	198	1163	0
ZH38T0015765	TSS	ENSG00000080824.18	HSP90AA1	protein_coding	0.994668	157998	281	566	0
ZH38T0010466	TSS	ENSG00000111640.15	GAPDH	protein_coding	0.994664	34671	1	185	0
ZH38T0048673	TSS	ENSG00000126233.2	SLURP1	protein_coding	0.994655	10049	20	34	0
ZH38T0000052	TSS	ENSG00000175756.13	AURKAIP1	protein_coding	0.994647	371429	57	1942	0
ZH38T0040715	TSS	ENSG00000145850.9	TIMD4	protein_coding	0.99462	5546	6	24	0
ZH38T0015269	TSS	ENSG00000156030.13	ELMSAN1	protein_coding	0.994593	14348	25	53	0
ZH38T0015570	TSS	ENSG00000153485.5, ENSG00000259066.5	TMEM251 , AL110118.2	protein_coding, protein_coding	0.994589	45768	210	39	0
ZH38T0037152	TSS	ENSG00000109272.4	PF4V1	protein_coding	0.994553	913	0	5	0
ZH38T0050387	TSS	ENSG00000136942.15	RPL35	protein_coding	0.994532	2535261	4875	9060	3
ZH38T0024390	TSS	ENSG00000221983.7	UBA52	protein_coding	0.994523	1073851	3230	2684	0
ZH38T0016480	TSS	ENSG00000104131.13	EIF3J	protein_coding	0.994508	665514	2367	1308	0
ZH38T0008370	TSS	ENSG00000186652.10	PRG2	protein_coding	0.994505	5973	6	27	0
ZH38T0023106	TSS	ENSG00000134440.12	NARS	protein_coding	0.994487	251303	953	440	0
ZH38T0012373	TSS	ENSG00000136014.12	USP44	protein_coding	0.994475	3960	13	9	0
ZH38T0017726	TSS	ENSG00000103202.13	NME4	protein_coding	0.99445	73106	388	20	0
ZH38T0028513	TSS	ENSG00000076003.5	MCM6	protein_coding	0.994411	30600	118	54	0
ZH38T0017705	TSS	ENSG00000206172.8	HBA1	protein_coding	0.994405	1955	0	11	0
ZH38T0024388	TSS	ENSG00000105700.11	KXD1	protein_coding	0.994375	912168	1392	3768	0
ZH38T0031409	TSS	ENSG00000101193.8	GID8	protein_coding	0.994346	80026	271	184	0
ZH38T0024647	TSS	ENSG00000089356.18, ENSG00000285526.1	FXYD3 , AC020907.6	protein_coding, protein_coding	0.994301	1919	4	7	0
ZH38T0012985	TSS	ENSG00000111328.7	CDK2AP1	protein_coding	0.994263	3293	14	5	0
ZH38T0045951	TSS	ENSG00000205236.6, ENSG00000267368.1, ENSG00000284981.1	AC105052.1 , UPK3BL1 , AC093668.2	protein_coding, protein_coding, protein_coding	0.994238	4486	26	0	0
ZH38T0012860	TSS	ENSG00000111775.3, ENSG00000111780.8	COX6A1 , AL021546.1	protein_coding, protein_coding	0.994208	442494	1180	1398	0
ZH38T0012521	TSS	ENSG00000286410.1	AC089985.1	lncRNA	0.994186	855	3	2	0
ZH38T0031383	TSS	ENSG00000171858.18	RPS21	protein_coding	0.994176	171565	37	967	1
ZH38T0022298	TSS	ENSG00000173821.19	AC124319.1	protein_coding	0.994142	180228	1044	18	0
ZH38T0044413	TSS	ENSG00000075624.16	ACTB	protein_coding	0.994136	963781	4982	671	32
ZH38T0021069	TSS	ENSG00000131477.11	RAMP2	protein_coding	0.994094	35853	30	183	0
ZH38T0017324	TSS	ENSG00000182774.13	RPS17	protein_coding	0.994085	1093440	1176	5318	12
ZH38T0040274	TSS	ENSG00000171604.12	CXXC5	protein_coding	0.994072	14087	18	66	0
ZH38T0014491	TSS	ENSG00000092010.15	PSME1	protein_coding	0.99407	1951940	3704	7936	4
ZH38T0023284	TSS	ENSG00000215421.9	ZNF407	protein_coding	0.994005	12436	20	55	0
ZH38T0007268	TSS	ENSG00000165828.15	PRAP1	protein_coding	0.993986	107764	590	62	0
ZH38T0025521	TSS	ENSG00000142227.11	EMP3	protein_coding	0.993972	212392	970	318	0
ZH38T0005329	TSS	ENSG00000123240.17	OPTN	protein_coding	0.993971	737956	1992	2484	0
ZH38T0026123	TSS	ENSG00000160472.5	TMEM190	protein_coding	0.993912	4571	3	25	0
ZH38T0025553	TSS	ENSG00000105516.10	DBP	protein_coding	0.993902	4564	0	28	0
ZH38T0000660	TSS	ENSG00000159189.12	C1QC	protein_coding	0.993894	272007	18	1653	0
ZH38T0045635	TSS	ENSG00000158528.12	PPP1R9A	protein_coding	0.993887	40971	12	240	0
ZH38T0001821	TSS	ENSG00000162595.6	DIRAS3	protein_coding	0.993876	8277	0	51	0
ZH38T0040714	TSS	ENSG00000145850.9	TIMD4	protein_coding	0.993848	1454	1	8	0
ZH38T0000617	TSS	ENSG00000117298.16	ECE1	protein_coding	0.993847	38764	124	114	2
ZH38T0026431	TSS	ENSG00000134330.18	IAH1	protein_coding	0.993845	272574	1476	212	0
ZH38T0012782	TSS	ENSG00000089250.19	NOS1	protein_coding	0.993827	322	1	1	0
ZH38T0052313	TSS	ENSG00000269096.6	CT45A3	protein_coding	0.993827	161	1	0	0
ZH38T0033257	TSS	ENSG00000008735.14	MAPK8IP2	protein_coding	0.993815	16390	64	38	0
ZH38T0038688	TSS	ENSG00000150753.12	CCT5	protein_coding	0.993789	1010889	3627	2688	3
ZH38T0020086	TSS	ENSG00000220205.9, ENSG00000263620.1	VAMP2 , AC129492.4	protein_coding, protein_coding	0.993786	209172	160	1148	0
ZH38T0045594	TSS	ENSG00000105810.9	CDK6	protein_coding	0.993772	5744	14	22	0
ZH38T0036343	TSS	ENSG00000169020.10	ATP5ME	protein_coding	0.993747	317070	1416	578	1
ZH38T0030142	TSS	ENSG00000130294.16	KIF1A	protein_coding	0.993738	177723	1029	91	0
ZH38T0046315	TSS	ENSG00000128596.17	CCDC136	protein_coding	0.99373	12362	0	78	0
ZH38T0026142	TSS	ENSG00000171425.10	ZNF581	protein_coding	0.993725	10768	0	68	0
ZH38T0051958	TSS	ENSG00000133142.17	TCEAL4	protein_coding	0.993716	5479062	234	34410	6
ZH38T0029930	TSS	ENSG00000171596.7, ENSG00000286942.1	NMUR1 , AC017104.6	protein_coding, lncRNA	0.993711	790	5	0	0
ZH38T0030216	TSS	ENSG00000186458.5	DEFB132	protein_coding	0.993697	473	0	3	0
ZH38T0023534	TSS	ENSG00000095932.6	SMIM24	protein_coding	0.993693	29621	67	121	0
ZH38T0027622	TSS	ENSG00000163170.12	BOLA3	protein_coding	0.993688	351400	1212	1020	0
ZH38T0029767	TSS	ENSG00000072195.15	SPEG	protein_coding	0.993663	784	3	2	0
ZH38T0007659	TSS	ENSG00000213931.7	HBE1	protein_coding	0.993656	2506	0	16	0
ZH38T0015387	TSS	ENSG00000100593.18	ISM2	protein_coding	0.99364	4062	2	24	0
ZH38T0030453	TSS	ENSG00000287062.1	AL121582.1	lncRNA	0.993631	156	0	1	0
ZH38T0029342	TSS	ENSG00000155729.13	KCTD18	protein_coding	0.99357	29048	170	18	0
ZH38T0000061	TSS	ENSG00000179403.12	VWA1	protein_coding	0.99353	1382	3	6	0
ZH38T0008680	TSS	ENSG00000162231.14	NXF1	protein_coding	0.993529	54354	198	156	0
ZH38T0014303	TSS	ENSG00000169397.3	RNASE3	protein_coding	0.993521	460	0	3	0
ZH38T0025070	TSS	ENSG00000269858.6	EGLN2	protein_coding	0.993482	41308	228	43	0
ZH38T0002983	TSS	ENSG00000187180.3	LCE2C	protein_coding	0.99344	1363	1	8	0
ZH38T0050462	TSS	ENSG00000106992.19	AK1	protein_coding	0.993433	2118	3	11	0
ZH38T0018501	TSS	ENSG00000261740.6	BOLA2-SMG1P6	protein_coding	0.993425	78867	522	0	0
ZH38T0017128	TSS	ENSG00000140505.7	CYP1A2	protein_coding	0.993421	302	0	2	0
ZH38T0035352	TSS	ENSG00000158234.12	FAIM	protein_coding	0.993336	12670	73	12	0
ZH38T0026371	TSS	ENSG00000171863.15	RPS7	protein_coding	0.993323	2819868	6444	12486	24
ZH38T0043503	TSS	ENSG00000198523.6	PLN	protein_coding	0.99329	128633	17	852	0
ZH38T0018797	TSS	ENSG00000166164.15	BRD7	protein_coding	0.993272	24508	78	88	0
ZH38T0034382	TSS	ENSG00000168301.13	KCTD6	protein_coding	0.993262	15626	98	8	0
ZH38T0003014	TSS	ENSG00000163216.7, ENSG00000203785.9	SPRR2D , SPRR2E	protein_coding, protein_coding	0.993255	5007	0	34	0
ZH38T0010803	TSS	ENSG00000111305.19	GSG1	protein_coding	0.993243	1764	9	3	0
ZH38T0007662	TSS	ENSG00000175520.9	UBQLN3	protein_coding	0.99324	4261	1	28	0
ZH38T0003310	TSS	ENSG00000242252.2	BGLAP	protein_coding	0.993236	881	2	4	0
ZH38T0028314	TSS	ENSG00000171227.7	TMEM37	protein_coding	0.993231	29054	147	51	0
ZH38T0011661	TSS	ENSG00000172551.11	MUCL1	protein_coding	0.993224	22574	38	116	0
ZH38T0028069	TSS	ENSG00000071082.11	RPL31	protein_coding	0.993208	16378	47	65	0
ZH38T0008772	TSS	ENSG00000219435.6	CATSPERZ	protein_coding	0.9932	4820	3	30	0
ZH38T0015072	TSS	ENSG00000179841.8	AKAP5	protein_coding	0.993158	4355	1	29	0
ZH38T0013424	TSS	ENSG00000133104.14	SPART	protein_coding	0.993112	66037	8	449	1
ZH38T0003186	TSS	ENSG00000179085.7	DPM3	protein_coding	0.993109	20177	15	125	0
ZH38T0027406	TSS	ENSG00000011523.14	CEP68	protein_coding	0.993097	56973	288	108	0
ZH38T0030158	TSS	ENSG00000115685.15	PPP1R7	protein_coding	0.993074	197865	1077	303	0
ZH38T0051941	TSS	ENSG00000204065.3	TCEAL5	protein_coding	0.993051	34152	107	132	0
ZH38T0007687	TSS	ENSG00000166313.19	APBB1	protein_coding	0.99305	1286	1	8	0
ZH38T0028309	TSS	ENSG00000155368.16	DBI	protein_coding	0.993045	3340433	9065	14331	0
ZH38T0008815	TSS	ENSG00000213465.8, ENSG00000273003.1	ARL2 , ARL2-SNX15	protein_coding, protein_coding	0.993033	432760	1568	1464	4
ZH38T0021018	TSS	ENSG00000173786.17	CNP	protein_coding	0.993024	81570	432	141	0
ZH38T0022423	TSS	ENSG00000169727.12	GPS1	protein_coding	0.99302	191489	535	811	0
ZH38T0051909	TSS	ENSG00000126945.9	HNRNPH2	protein_coding	0.993013	87543	7	609	0
ZH38T0034048	TSS	ENSG00000232112.3	TMA7	protein_coding	0.992983	221459	12	1552	1
ZH38T0021110	TSS	ENSG00000236383.8	CCDC200	protein_coding	0.992958	705	5	0	0
ZH38T0001062	TSS	ENSG00000189280.3	GJB5	protein_coding	0.992915	7147	0	51	0
ZH38T0032420	TSS	ENSG00000100028.12	SNRPD3	protein_coding	0.992911	354062	1970	558	0
ZH38T0014655	TSS	ENSG00000165410.14	CFL2	protein_coding	0.992898	401244	1938	932	0
ZH38T0051940	TSS	ENSG00000180964.17	TCEAL8	protein_coding	0.992877	540576	16	3862	0
ZH38T0052594	TSS	ENSG00000160219.12	GAB3	protein_coding	0.992877	32058	176	54	0
ZH38T0034711	TSS	ENSG00000174173.7	TRMT10C	protein_coding	0.992854	94901	5	678	0
ZH38T0015617	TSS	ENSG00000196136.17	SERPINA3	protein_coding	0.992838	187688	135	1219	0
ZH38T0015798	TSS	ENSG00000100664.11	EIF5	protein_coding	0.992822	124198	692	206	0
ZH38T0032010	TSS	ENSG00000184900.15	SUMO3	protein_coding	0.99282	103704	508	242	0
ZH38T0008632	TSS	ENSG00000254772.10	EEF1G	protein_coding	0.992809	431305	1082	2042	0
ZH38T0003189	TSS	ENSG00000163463.11	KRTCAP2	protein_coding	0.992805	349810	614	1919	2
ZH38T0034264	TSS	ENSG00000114854.7	TNNC1	protein_coding	0.992758	92256	431	242	0
ZH38T0018007	TSS	ENSG00000089486.17	CDIP1	protein_coding	0.99275	7257	44	8	1
ZH38T0005366	TSS	ENSG00000152455.15	SUV39H2	protein_coding	0.992749	66126	312	171	0
ZH38T0037335	TSS	ENSG00000189308.11	LIN54	protein_coding	0.992718	3681	25	1	1
ZH38T0037140	TSS	ENSG00000081051.7	AFP	protein_coding	0.992708	7487	25	30	0
ZH38T0035940	TSS	ENSG00000043093.14	DCUN1D1	protein_coding	0.992682	82337	589	18	0
ZH38T0030642	TSS	ENSG00000088320.4	REM1	protein_coding	0.992674	9214	15	53	0
ZH38T0017874	TSS	ENSG00000162065.14	TBC1D24	protein_coding	0.992624	8882	66	0	0
ZH38T0040539	TSS	ENSG00000127743.6	IL17B	protein_coding	0.992616	1882	8	6	0
ZH38T0014301	TSS	ENSG00000129538.14	RNASE1	protein_coding	0.992595	821043	12	6097	16
ZH38T0028825	TSS	ENSG00000136531.16	SCN2A	protein_coding	0.992574	3475	14	12	0
ZH38T0023519	TSS	ENSG00000267448.6	AC010649.1	lncRNA	0.992571	668	5	0	0
ZH38T0051943	TSS	ENSG00000133134.11	BEX2	protein_coding	0.992568	382653	6	2859	0
ZH38T0011908	TSS	ENSG00000255737.2	AGAP2-AS1	lncRNA	0.992567	10416	5	73	0
ZH38T0009049	TSS	ENSG00000172725.14	CORO1B	protein_coding	0.992528	1594	8	4	0
ZH38T0007742	TSS	ENSG00000166441.13	RPL27A	protein_coding	0.99251	9806	0	74	0
ZH38T0017095	TSS	ENSG00000159289.6	GOLGA6A	protein_coding	0.992481	132	1	0	0
ZH38T0022374	TSS	ENSG00000262660.1, ENSG00000262814.8	AC139530.3 , MRPL12	protein_coding, protein_coding	0.992463	143000	330	756	0
ZH38T0017010	TSS	ENSG00000140332.16	TLE3	protein_coding	0.992388	9908	64	12	0
ZH38T0009651	TSS	ENSG00000255501.2	CARD18	protein_coding	0.992382	1433	8	3	0
ZH38T0010365	TSS	ENSG00000111206.12	FOXM1	protein_coding	0.99238	6772	4	48	0
ZH38T0046734	TSS	ENSG00000133574.10	GIMAP4	protein_coding	0.992374	52834	22	384	0
ZH38T0021822	TSS	ENSG00000266820.1	KPNA2P3	transcribed_unprocessed_pseudogene	0.99232	646	2	3	0
ZH38T0009730	TSS	ENSG00000137720.8	C11orf1	protein_coding	0.992319	10077	45	33	0
ZH38T0023302	TSS	ENSG00000101493.11	ZNF516	protein_coding	0.992303	1676	7	6	0
ZH38T0024674	TSS	ENSG00000105695.15	MAG	protein_coding	0.992295	9788	36	40	0
ZH38T0009956	TSS	ENSG00000110367.13	DDX6	protein_coding	0.992261	454898	1870	1678	0
ZH38T0000917	TSS	ENSG00000159023.21	EPB41	protein_coding	0.992255	1270920	4000	5920	0
ZH38T0027514	TSS	ENSG00000116005.12	PCYOX1	protein_coding	0.992248	216830	618	1076	0
ZH38T0027877	TSS	ENSG00000211592.8, ENSG00000211595.2, ENSG00000240382.3, ENSG00000240671.4, ENSG00000241755.1, ENSG00000242371.1, ENSG00000243466.1	IGKC , IGKJ3 , IGKV1-17 , IGKV1-8 , IGKV1-9 , IGKV1-39 , IGKV1-5	IG_C_gene, IG_J_gene, IG_V_gene, IG_V_gene, IG_V_gene, IG_V_gene, IG_V_gene	0.992199	8394	60	5	1
ZH38T0002958	TSS	ENSG00000197747.9	S100A10	protein_coding	0.992135	232359	1415	427	0
ZH38T0017788	TSS	ENSG00000174109.5	C16orf91	protein_coding	0.992129	13488	52	55	0
ZH38T0027842	TSS	ENSG00000287686.1	AC062029.1	lncRNA	0.992039	3240	0	26	0
ZH38T0031159	TSS	ENSG00000124201.15	ZNFX1	protein_coding	0.991999	150520	434	780	0
ZH38T0051206	TSS	ENSG00000102172.16	SMS	protein_coding	0.991989	541158	2782	1588	0
ZH38T0033858	TSS	ENSG00000008324.11	SS18L2	protein_coding	0.991986	42704	172	173	0
ZH38T0030532	TSS	ENSG00000101343.14	CRNKL1	protein_coding	0.991981	90671	395	338	0
ZH38T0007339	TSS	ENSG00000099849.15	RASSF7	protein_coding	0.991973	19032	80	74	0
ZH38T0028423	TSS	ENSG00000152086.9	TUBA3E	protein_coding	0.991968	1976	8	8	0
ZH38T0035129	TSS	ENSG00000114631.11	PODXL2	protein_coding	0.991909	52227	392	34	0
ZH38T0002964	TSS	ENSG00000163191.6	S100A11	protein_coding	0.991909	508859	2506	1639	6
ZH38T0004740	TSS	ENSG00000143819.12	EPHX1	protein_coding	0.991898	110795	620	285	0
ZH38T0005970	TSS	ENSG00000138311.17	ZNF365	protein_coding	0.991873	2685	9	13	0
ZH38T0000987	TSS	ENSG00000084652.16	TXLNA	protein_coding	0.991832	48693	347	54	0
ZH38T0000465	TSS	ENSG00000183888.4	SRARP	protein_coding	0.99182	485	0	4	0
ZH38T0024939	TSS	ENSG00000262484.1	CCER2	protein_coding	0.991803	1573	1	12	0
ZH38T0008314	TSS	ENSG00000110514.19	MADD	protein_coding	0.991797	122592	102	912	0
ZH38T0022211	TSS	ENSG00000108639.7	SYNGR2	protein_coding	0.991786	483	0	4	0
ZH38T0027767	TSS	ENSG00000168899.5	VAMP5	protein_coding	0.991773	35199	109	183	0
ZH38T0000229	TSS	ENSG00000116288.13	PARK7	protein_coding	0.991769	803199	6534	126	6
ZH38T0051060	TSS	ENSG00000073464.12	CLCN4	protein_coding	0.991756	7218	59	1	0
ZH38T0010464	TSS	ENSG00000111640.15	GAPDH	protein_coding	0.991733	74019	319	298	0
ZH38T0017822	TSS	ENSG00000140986.8	RPL3L	protein_coding	0.991723	13300	43	68	0
ZH38T0025545	TSS	ENSG00000063177.13	RPL18	protein_coding	0.991685	1121092	4720	4680	0
ZH38T0024276	TSS	ENSG00000105072.9	C19orf44	protein_coding	0.991678	22402	10	178	0
ZH38T0004791	TSS	ENSG00000143761.16	ARF1	protein_coding	0.991664	407812	3246	178	4
ZH38T0005653	TSS	ENSG00000165322.17	ARHGAP12	protein_coding	0.991644	306164	1804	776	0
ZH38T0037545	TSS	ENSG00000145331.14	TRMT10A	protein_coding	0.991641	82332	226	468	0
ZH38T0019411	TSS	ENSG00000230989.6	HSBP1	protein_coding	0.991636	311803	1222	1408	0
ZH38T0035178	TSS	ENSG00000169704.4	GP9	protein_coding	0.99159	1297	3	8	0
ZH38T0022500	TSS	ENSG00000176890.16	TYMS	protein_coding	0.991585	13434	22	92	0
ZH38T0031972	TSS	ENSG00000160213.7	CSTB	protein_coding	0.991567	514290	4	4362	8
ZH38T0006399	TSS	ENSG00000182333.14	LIPF	protein_coding	0.991549	144548	804	424	4
ZH38T0046874	TSS	ENSG00000126870.16	WDR60	protein_coding	0.991489	80153	219	469	0
ZH38T0003031	TSS	ENSG00000163221.9	S100A12	protein_coding	0.991483	11991	19	84	0
ZH38T0004755	TSS	ENSG00000163041.11	H3F3A	protein_coding	0.991458	837124	484	6724	4
ZH38T0032326	TSS	ENSG00000211653.2, ENSG00000211677.2, ENSG00000211679.2, ENSG00000224144.1	IGLV1-40 , IGLC2 , IGLC3 , ASH2LP1	IG_V_gene, IG_C_gene, IG_C_gene, processed_pseudogene	0.991436	18291	54	21	83
ZH38T0023962	TSS	ENSG00000127616.18	SMARCA4	protein_coding	0.991429	164484	972	450	0
ZH38T0025658	TSS	ENSG00000142541.17	RPL13A	protein_coding	0.991428	1206726	8846	1584	4
ZH38T0051704	TSS	ENSG00000169562.11	GJB1	protein_coding	0.991418	10744	0	93	0
ZH38T0003518	TSS	ENSG00000143256.5	PFDN2	protein_coding	0.991405	153064	160	1165	2
ZH38T0039720	TSS	ENSG00000164307.13	ERAP1	protein_coding	0.991402	23176	51	150	0
ZH38T0004493	TSS	ENSG00000117594.10	HSD11B1	protein_coding	0.991376	6782	18	41	0
ZH38T0016190	TSS	ENSG00000182117.5	NOP10	protein_coding	0.991367	592409	816	4343	0
ZH38T0022733	TSS	ENSG00000167088.11	SNRPD1	protein_coding	0.99133	2235567	7425	12108	18
ZH38T0030441	TSS	ENSG00000089048.14	ESF1	protein_coding	0.991323	2285	13	7	0
ZH38T0000760	TSS	ENSG00000117614.10	SYF2	protein_coding	0.991318	661802	3272	2524	0
ZH38T0004255	TSS	ENSG00000143847.15	PPFIA4	protein_coding	0.991282	12849	2	111	0
ZH38T0047637	TSS	ENSG00000168333.13	PPDPFL	protein_coding	0.991276	28293	39	210	0
ZH38T0033852	TSS	ENSG00000187094.11	CCK	protein_coding	0.991275	8180	19	53	0
ZH38T0051935	TSS	ENSG00000133169.6	BEX1	protein_coding	0.991262	102094	4	896	0
ZH38T0048857	TSS	ENSG00000182307.14	C8orf33	protein_coding	0.991253	239685	245	1870	0
ZH38T0008317	TSS	ENSG00000110514.19	MADD	protein_coding	0.991242	67906	100	500	0
ZH38T0023785	TSS	ENSG00000174788.10	PCP2	protein_coding	0.991228	791	1	6	0
ZH38T0048818	TSS	ENSG00000160949.17	TONSL	protein_coding	0.991208	28299	142	109	0
ZH38T0043663	TSS	ENSG00000079819.19	EPB41L2	protein_coding	0.991183	68235	63	544	0
ZH38T0052441	TSS	ENSG00000147400.8	CETN2	protein_coding	0.99118	160029	388	1035	1
ZH38T0031881	TSS	ENSG00000183036.11	PCP4	protein_coding	0.99113	71963	291	353	0
ZH38T0030250	TSS	ENSG00000125898.13	FAM110A	protein_coding	0.991123	2233	6	14	0
ZH38T0038073	TSS	ENSG00000164167.12	LSM6	protein_coding	0.991123	377145	2022	1356	0
ZH38T0009648	TSS	ENSG00000204397.7	CARD16	protein_coding	0.991102	65716	320	270	0
ZH38T0009533	TSS	ENSG00000168876.9	ANKRD49	protein_coding	0.991101	216162	42	1899	0
ZH38T0003676	TSS	ENSG00000143158.11	MPC2	protein_coding	0.991049	3100	15	13	0
ZH38T0012914	TSS	ENSG00000158023.10	WDR66	protein_coding	0.991042	19028	26	144	2
ZH38T0007623	TSS	ENSG00000205531.13	NAP1L4	protein_coding	0.991041	1088511	8712	1125	3
ZH38T0052070	TSS	ENSG00000077279.18	DCX	protein_coding	0.990994	231516	315	1789	0
ZH38T0024719	TSS	ENSG00000126267.11	COX6B1	protein_coding	0.99099	435778	1752	2210	0
ZH38T0000218	TSS	ENSG00000049245.13	VAMP3	protein_coding	0.990976	67864	259	359	0
ZH38T0032347	TSS	ENSG00000211669.3, ENSG00000211677.2, ENSG00000211679.2, ENSG00000254709.7	IGLV3-10 , IGLC2 , IGLC3 , IGLL5	IG_V_gene, IG_C_gene, IG_C_gene, protein_coding	0.990971	4500	2	39	0
ZH38T0020784	TSS	ENSG00000108298.11	RPL19	protein_coding	0.990961	2697030	8676	15918	8
ZH38T0048626	TSS	ENSG00000167632.16	TRAPPC9	protein_coding	0.990882	24451	162	63	0
ZH38T0032057	TSS	ENSG00000173638.19	SLC19A1	protein_coding	0.990879	10103	90	3	0
ZH38T0050507	TSS	ENSG00000136811.16	ODF2	protein_coding	0.990872	1954	0	18	0
ZH38T0008605	TSS	ENSG00000149021.7	SCGB1A1	protein_coding	0.990868	11284	45	59	0
ZH38T0032530	TSS	ENSG00000128342.5	LIF	protein_coding	0.990868	2170	6	14	0
ZH38T0010755	TSS	ENSG00000134551.12	PRH2	protein_coding	0.990828	6914	20	44	0
ZH38T0003398	TSS	ENSG00000176320.2	AL138899.1	lncRNA	0.990826	540	3	2	0
ZH38T0039325	TSS	ENSG00000085231.14, ENSG00000273841.5	AK6 , TAF9	protein_coding, protein_coding	0.990823	1531050	9250	4930	0
ZH38T0017725	TSS	ENSG00000086504.16	MRPL28	protein_coding	0.990822	105152	888	86	0
ZH38T0028014	TSS	ENSG00000071073.13	MGAT4A	protein_coding	0.9908	16155	148	0	2
ZH38T0033684	TSS	ENSG00000144635.9	DYNC1LI1	protein_coding	0.990787	582662	1588	3830	0
ZH38T0023437	TSS	ENSG00000127540.12, ENSG00000267059.2	UQCR11 , AC005943.1	protein_coding, protein_coding	0.990772	926372	2620	6000	8
ZH38T0048677	TSS	ENSG00000180155.20	LYNX1	protein_coding	0.990749	36414	86	254	0
ZH38T0027962	TSS	ENSG00000144028.15	SNRNP200	protein_coding	0.99074	205201	776	1142	0
ZH38T0017106	TSS	ENSG00000129009.13	ISLR	protein_coding	0.9907	6285	0	59	0
ZH38T0003045	TSS	ENSG00000188015.10, ENSG00000196154.12	S100A3 , S100A4	protein_coding, protein_coding	0.990699	2876	2	25	0
ZH38T0041306	TSS	ENSG00000180822.11	PSMG4	protein_coding	0.99069	726805	2290	4530	10
ZH38T0008298	TSS	ENSG00000175216.14	CKAP5	protein_coding	0.990687	198076	1672	188	2
ZH38T0034426	TSS	ENSG00000163634.12	THOC7	protein_coding	0.990682	350430	2214	1082	0
ZH38T0050048	TSS	ENSG00000155833.15	CYLC2	protein_coding	0.990654	1908	0	18	0
ZH38T0035973	TSS	ENSG00000161203.13	AP2M1	protein_coding	0.990654	520014	1552	3354	0
ZH38T0019118	TSS	ENSG00000102898.12	NUTF2	protein_coding	0.990648	245450	2195	121	1
ZH38T0025311	TSS	ENSG00000234906.10	APOC2	protein_coding	0.990585	124041	138	1041	0
ZH38T0025166	TSS	ENSG00000105732.13	ZNF574	protein_coding	0.990568	15334	0	146	0
ZH38T0049479	TSS	ENSG00000204802.3, ENSG00000231212.1	AL590399.1 , AL590399.3	lncRNA, lncRNA	0.990566	840	7	1	0
ZH38T0007533	TSS	ENSG00000130598.16	TNNI2	protein_coding	0.990561	40614	120	267	0
ZH38T0037086	TSS	ENSG00000171209.3	CSN3	protein_coding	0.990544	419	0	4	0
ZH38T0004722	TSS	ENSG00000143815.15	LBR	protein_coding	0.990541	101786	755	217	0
ZH38T0030316	TSS	ENSG00000198171.13	DDRGK1	protein_coding	0.990525	466896	3498	968	0
ZH38T0023011	TSS	ENSG00000215472.10, ENSG00000265681.7	RPL17-C18orf32 , RPL17	protein_coding, protein_coding	0.990438	12948	28	97	0
ZH38T0042636	TSS	ENSG00000124733.4	MEA1	protein_coding	0.99039	259496	2124	394	0
ZH38T0051601	TSS	ENSG00000158639.12	PAGE5	protein_coding	0.990361	30825	219	81	0
ZH38T0022048	TSS	ENSG00000177303.10	CASKIN2	protein_coding	0.990341	32196	192	122	0
ZH38T0008602	TSS	ENSG00000110484.7	SCGB2A2	protein_coding	0.990335	45292	174	268	0
ZH38T0047136	TSS	ENSG00000104611.12	SH2D4A	protein_coding	0.990333	7376	59	13	0
ZH38T0022446	TSS	ENSG00000141574.7	SECTM1	protein_coding	0.990324	4094	33	7	0
ZH38T0036500	TSS	ENSG00000132405.19	TBC1D14	protein_coding	0.990316	3170	11	20	0
ZH38T0000435	TSS	ENSG00000142615.8	CELA2A	protein_coding	0.990305	11338	90	21	0
ZH38T0035183	TSS	ENSG00000240682.9, ENSG00000261796.1	ISY1 , ISY1-RAB43	protein_coding, protein_coding	0.99029	312699	2877	186	3
ZH38T0037093	TSS	ENSG00000132465.11	JCHAIN	protein_coding	0.99027	916	2	7	0
ZH38T0010132	TSS	ENSG00000149547.15	EI24	protein_coding	0.990262	173886	1542	168	0
ZH38T0011622	TSS	ENSG00000094916.16	CBX5	protein_coding	0.990261	119778	388	790	0
ZH38T0037884	TSS	ENSG00000138709.19	LARP1B	protein_coding	0.990253	162960	1568	36	0
ZH38T0032200	TSS	ENSG00000242259.8	C22orf39	protein_coding	0.990235	82752	596	220	0
ZH38T0007181	TSS	ENSG00000065154.11	OAT	protein_coding	0.990233	66613	639	18	0
ZH38T0046750	TSS	ENSG00000002726.20	AOC1	protein_coding	0.990209	18406	18	164	0
ZH38T0017239	TSS	ENSG00000041357.16	PSMA4	protein_coding	0.990207	679990	2445	4280	0
ZH38T0024258	TSS	ENSG00000167460.17	TPM4	protein_coding	0.990193	391436	682	3195	0
ZH38T0015808	TSS	ENSG00000166165.13	CKB	protein_coding	0.99019	1716	0	17	0
ZH38T0039228	TSS	ENSG00000068796.16	KIF2A	protein_coding	0.990183	110854	840	259	0
ZH38T0044343	TSS	ENSG00000122687.17, ENSG00000286192.1	MRM2 , AC069288.1	protein_coding, protein_coding	0.990181	58084	488	88	0
ZH38T0025744	TSS	ENSG00000161640.15	SIGLEC11	protein_coding	0.990164	302	0	3	0
ZH38T0023835	TSS	ENSG00000185236.12	RAB11B	protein_coding	0.990162	240639	1932	459	0
ZH38T0020158	TSS	ENSG00000109061.10, ENSG00000264424.1	MYH1 , MYH4	protein_coding, protein_coding	0.990134	5018	28	22	0
ZH38T0005800	TSS	ENSG00000172661.18	WASHC2C	protein_coding	0.990122	726498	2742	4506	0
ZH38T0050255	TSS	ENSG00000119401.10	TRIM32	protein_coding	0.99011	21624	176	40	0
ZH38T0003137	TSS	ENSG00000160710.17	ADAR	protein_coding	0.99009	47058	63	408	0
ZH38T0047927	TSS	ENSG00000171033.13	PKIA	protein_coding	0.990088	8890	30	59	0
ZH38T0030124	TSS	ENSG00000172428.11	COPS9	protein_coding	0.990086	159988	852	750	0
ZH38T0026031	TSS	ENSG00000167615.16	LENG8	protein_coding	0.990085	81582	203	614	0
ZH38T0000650	TSS	ENSG00000070831.17	CDC42	protein_coding	0.989998	1165985	11070	695	15
ZH38T0001424	TSS	ENSG00000132763.15	MMACHC	protein_coding	0.989993	40760	52	360	0
ZH38T0018737	TSS	ENSG00000169877.10	AHSP	protein_coding	0.989975	19059	3	190	0
ZH38T0028450	TSS	ENSG00000075886.11	TUBA3D	protein_coding	0.989974	3851	6	33	0
ZH38T0045373	TSS	ENSG00000006606.8	CCL26	protein_coding	0.989971	1678	0	17	0
ZH38T0005685	TSS	ENSG00000150093.19	ITGB1	protein_coding	0.989958	6408	13	52	0
ZH38T0001090	TSS	ENSG00000092853.14	CLSPN	protein_coding	0.989951	155248	408	1160	8
ZH38T0013660	TSS	ENSG00000136147.18	PHF11	protein_coding	0.989938	76736	578	202	0
ZH38T0006944	TSS	ENSG00000119950.21	MXI1	protein_coding	0.989932	15240	130	20	5
ZH38T0040113	TSS	ENSG00000213585.11	VDAC1	protein_coding	0.989922	378065	3261	581	7
ZH38T0017779	TSS	ENSG00000103275.20	UBE2I	protein_coding	0.989904	794499	6240	1863	0
ZH38T0015881	TSS	ENSG00000213145.9	CRIP1	protein_coding	0.989899	490	1	4	0
ZH38T0030843	TSS	ENSG00000118707.10	TGIF2	protein_coding	0.989848	2340	20	4	0
ZH38T0005426	TSS	ENSG00000148482.12	SLC39A12	protein_coding	0.989837	2922	27	3	0
ZH38T0022020	TSS	ENSG00000167863.12	ATP5PD	protein_coding	0.989837	1086764	9294	1864	0
ZH38T0036930	TSS	ENSG00000226887.8	ERVMER34-1	protein_coding	0.989811	680	1	6	0
ZH38T0010141	TSS	ENSG00000110060.9	PUS3	protein_coding	0.98981	52646	80	462	0
ZH38T0045010	TSS	ENSG00000106608.16, ENSG00000270617.1	URGCP , URGCP-MRPS24	protein_coding, protein_coding	0.989775	212952	2148	52	0
ZH38T0024601	TSS	ENSG00000166398.12	KIAA0355	protein_coding	0.989772	30192	311	1	0
ZH38T0018570	TSS	ENSG00000149925.20	ALDOA	protein_coding	0.989735	26227	82	190	0
ZH38T0038549	TSS	ENSG00000083857.14	FAT1	protein_coding	0.989728	20620	0	214	0
ZH38T0011563	TSS	ENSG00000197111.15	PCBP2	protein_coding	0.989712	79272	546	278	0
ZH38T0045178	TSS	ENSG00000239789.6	MRPS17	protein_coding	0.98966	106048	217	890	1
ZH38T0009955	TSS	ENSG00000110367.13	DDX6	protein_coding	0.989628	160684	420	1264	0
ZH38T0045336	TSS	ENSG00000106682.14	EIF4H	protein_coding	0.989607	637408	6400	284	10
ZH38T0024653	TSS	ENSG00000221857.7, ENSG00000266964.5	AC020907.2 , FXYD1	lncRNA, protein_coding	0.989594	47548	224	276	0
ZH38T0012527	TSS	ENSG00000151131.11	C12orf45	protein_coding	0.989576	276068	1912	996	0
ZH38T0023576	TSS	ENSG00000167658.16	EEF2	protein_coding	0.98956	232025	1721	727	0
ZH38T0023812	TSS	ENSG00000104980.8	TIMM44	protein_coding	0.989559	60658	339	301	0
ZH38T0000806	TSS	ENSG00000142669.15	SH3BGRL3	protein_coding	0.989549	445293	146	4555	2
ZH38T0034050	TSS	ENSG00000164054.15	SHISA5	protein_coding	0.989547	177127	816	1055	0
ZH38T0002982	TSS	ENSG00000187223.3	LCE2D	protein_coding	0.989521	661	1	6	0
ZH38T0021890	TSS	ENSG00000141337.12	ARSG	protein_coding	0.989498	19598	94	114	0
ZH38T0021201	TSS	ENSG00000172992.12	DCAKD	protein_coding	0.989447	26440	240	42	0
ZH38T0001401	TSS	ENSG00000142937.12	RPS8	protein_coding	0.989442	994916	6282	4324	10
ZH38T0020490	TSS	ENSG00000198242.14	RPL23A	protein_coding	0.989437	566586	705	5343	1
ZH38T0037084	TSS	ENSG00000181617.5	FDCSP	protein_coding	0.989433	3090	11	22	0
ZH38T0003114	TSS	ENSG00000143569.19	UBAP2L	protein_coding	0.989432	365700	3165	741	0
ZH38T0030126	TSS	ENSG00000178602.8	OTOS	protein_coding	0.989426	655	6	1	0
ZH38T0005686	TSS	ENSG00000150093.19	ITGB1	protein_coding	0.989414	8879	68	27	0
ZH38T0017746	TSS	ENSG00000161996.19	WDR90	protein_coding	0.989412	9158	30	68	0
ZH38T0007264	TSS	ENSG00000198546.15	ZNF511	protein_coding	0.989411	4298	2	44	0
ZH38T0014940	TSS	ENSG00000126777.18	KTN1	protein_coding	0.989409	16816	154	24	2
ZH38T0013158	TSS	ENSG00000198033.12	TUBA3C	protein_coding	0.9894	12134	72	58	0
ZH38T0006447	TSS	ENSG00000204010.3	IFIT1B	protein_coding	0.989381	559	2	4	0
ZH38T0048830	TSS	ENSG00000160959.8	LRRC14	protein_coding	0.989378	10060	106	2	0
ZH38T0026967	TSS	ENSG00000055332.18	EIF2AK2	protein_coding	0.989377	75442	752	58	0
ZH38T0031810	TSS	ENSG00000224790.3	AP000704.1	lncRNA	0.989362	744	0	8	0
ZH38T0027739	TSS	ENSG00000034510.6	TMSB10	protein_coding	0.989341	327378	853	2671	3
ZH38T0004986	TSS	ENSG00000091483.6	FH	protein_coding	0.98933	135832	621	844	0
ZH38T0052119	TSS	ENSG00000147251.15	DOCK11	protein_coding	0.989326	5932	38	26	0
ZH38T0021983	TSS	ENSG00000172809.13	RPL38	protein_coding	0.989325	1636170	2008	15642	4
ZH38T0023254	TSS	ENSG00000170677.6	SOCS6	protein_coding	0.989316	42133	435	20	0
ZH38T0008812	TSS	ENSG00000168062.10	BATF2	protein_coding	0.989313	2592	0	28	0
ZH38T0008839	TSS	ENSG00000014216.15	CAPN1	protein_coding	0.989292	52015	176	387	0
ZH38T0047107	TSS	ENSG00000104763.19	ASAH1	protein_coding	0.98929	3174912	19179	15192	0
ZH38T0038839	TSS	ENSG00000113387.12	SUB1	protein_coding	0.989286	1496089	13698	2471	33
ZH38T0052460	TSS	ENSG00000262919.8	CCNQ	protein_coding	0.989284	5170	18	38	0
ZH38T0026793	TSS	ENSG00000115216.14	NRBP1	protein_coding	0.989247	356412	3148	726	0
ZH38T0000705	TSS	ENSG00000011007.12	ELOA	protein_coding	0.989227	63729	242	452	0
ZH38T0008936	TSS	ENSG00000172757.13	CFL1	protein_coding	0.989227	263165	2470	395	1
ZH38T0000304	TSS	ENSG00000162444.12	RBP7	protein_coding	0.989216	59807	196	456	0
ZH38T0040665	TSS	ENSG00000113140.11	SPARC	protein_coding	0.989174	341633	2129	1605	5
ZH38T0008829	TSS	ENSG00000149806.11	FAU	protein_coding	0.989172	1368963	432	14553	0
ZH38T0009082	TSS	ENSG00000110057.8	UNC93B1	protein_coding	0.989149	10939	44	76	0
ZH38T0015291	TSS	ENSG00000119655.10	NPC2	protein_coding	0.989142	1044445	2460	9005	0
ZH38T0002974	TSS	ENSG00000143520.6	FLG2	protein_coding	0.989134	21757	210	29	0
ZH38T0021603	TSS	ENSG00000181610.13	MRPS23	protein_coding	0.989122	307704	1382	2002	0
ZH38T0051576	TSS	ENSG00000158526.8	TSR2	protein_coding	0.989113	116014	231	1045	1
ZH38T0015810	TSS	ENSG00000166166.13	TRMT61A	protein_coding	0.989096	9071	48	52	0
ZH38T0024688	TSS	ENSG00000105679.9	GAPDHS	protein_coding	0.989087	3716	6	35	0
ZH38T0045923	TSS	ENSG00000128581.16	IFT22	protein_coding	0.989075	379884	3025	1171	0
ZH38T0042182	TSS	ENSG00000204356.14	NELFE	protein_coding	0.989073	149528	360	1292	0
ZH38T0026053	TSS	ENSG00000186818.12	LILRB4	protein_coding	0.989068	11400	27	99	0
ZH38T0048911	TSS	ENSG00000080608.10	PUM3	protein_coding	0.989043	249589	2211	554	0
ZH38T0018454	TSS	ENSG00000184730.11	APOBR	protein_coding	0.989033	20922	0	232	0
ZH38T0021793	TSS	ENSG00000136478.7	TEX2	protein_coding	0.989018	28728	17	302	0
ZH38T0032510	TSS	ENSG00000100296.13	THOC5	protein_coding	0.98899	422184	3600	1100	0
ZH38T0024733	TSS	ENSG00000188223.9, ENSG00000205155.8	AD000671.1 , PSENEN	protein_coding, protein_coding	0.988989	229117	4	2547	0
ZH38T0040316	TSS	ENSG00000113141.18	IK	protein_coding	0.98896	665388	4504	2924	0
ZH38T0015931	TSS	ENSG00000211896.7, ENSG00000211898.7, ENSG00000282651.2	IGHG1 , IGHD , IGHV5-10-1	IG_C_gene, IG_C_gene, IG_V_gene	0.988958	2239	4	1	20
ZH38T0020107	TSS	ENSG00000198844.12	ARHGEF15	protein_coding	0.988957	806	0	9	0
ZH38T0006081	TSS	ENSG00000079332.15	SAR1A	protein_coding	0.988955	417072	962	3694	2
ZH38T0013251	TSS	ENSG00000151849.15	CENPJ	protein_coding	0.988923	72585	39	774	0
ZH38T0002671	TSS	ENSG00000121851.13	POLR3GL	protein_coding	0.988911	230092	1544	1036	0
ZH38T0035546	TSS	ENSG00000181631.7	P2RY13	protein_coding	0.988911	6064	0	68	0
ZH38T0012666	TSS	ENSG00000111231.9	GPN3	protein_coding	0.98891	33708	166	212	0
ZH38T0030867	TSS	ENSG00000118705.17	RPN2	protein_coding	0.988907	116698	1163	135	11
ZH38T0027796	TSS	ENSG00000132313.15	MRPL35	protein_coding	0.988901	214110	414	1989	0
ZH38T0037092	TSS	ENSG00000132465.11	JCHAIN	protein_coding	0.988879	71312	148	654	0
ZH38T0045607	TSS	ENSG00000105825.14	TFPI2	protein_coding	0.988876	22758	44	212	0
ZH38T0001156	TSS	ENSG00000204084.13	INPP5B	protein_coding	0.988858	56355	592	43	0
ZH38T0030123	TSS	ENSG00000130414.12	NDUFA10	protein_coding	0.988854	1199584	9105	4416	0
ZH38T0006519	TSS	ENSG00000138207.14	RBP4	protein_coding	0.988852	41157	101	363	0
ZH38T0020767	TSS	ENSG00000125691.13	RPL23	protein_coding	0.988807	862187	524	9236	0
ZH38T0047220	TSS	ENSG00000158941.16	CCAR2	protein_coding	0.988795	35297	365	35	0
ZH38T0012491	TSS	ENSG00000166598.15	HSP90B1	protein_coding	0.988794	3123135	20860	14533	0
ZH38T0010000	TSS	ENSG00000076706.17	AP002956.1	protein_coding	0.988775	17881	79	124	0
ZH38T0020824	TSS	ENSG00000141741.12	MIEN1	protein_coding	0.98874	127233	234	1215	0
ZH38T0047621	TSS	ENSG00000104738.18	MCM4	protein_coding	0.988733	283979	155	3081	0
ZH38T0022401	TSS	ENSG00000185813.10	PCYT2	protein_coding	0.988728	8421	69	27	0
ZH38T0030099	TSS	ENSG00000168427.9	KLHL30	protein_coding	0.988669	2094	6	18	0
ZH38T0023533	TSS	ENSG00000095932.6	SMIM24	protein_coding	0.988669	349	0	4	0
ZH38T0003564	TSS	ENSG00000143226.13, ENSG00000273112.1	FCGR2A , AL590385.2	protein_coding, lncRNA	0.988636	174	1	1	0
ZH38T0034719	TSS	ENSG00000114391.13	RPL24	protein_coding	0.988632	774857	3165	5742	3
ZH38T0023347	TSS	ENSG00000172270.19	BSG	protein_coding	0.988619	850272	6296	3404	88
ZH38T0030215	TSS	ENSG00000125788.6	DEFB126	protein_coding	0.988615	521	0	6	0
ZH38T0051498	TSS	ENSG00000101951.16	PAGE4	protein_coding	0.988608	3124	30	6	0
ZH38T0032238	TSS	ENSG00000099901.17	RANBP1	protein_coding	0.98859	36911	199	227	0
ZH38T0003016	TSS	ENSG00000244094.2	SPRR2F	protein_coding	0.988579	6319	1	72	0
ZH38T0019943	TSS	ENSG00000170291.15	ELP5	protein_coding	0.988533	4138	14	34	0
ZH38T0022437	TSS	ENSG00000141526.16	SLC16A3	protein_coding	0.988529	7928	91	0	1
ZH38T0049160	TSS	ENSG00000147894.15	C9orf72	protein_coding	0.988519	252974	1030	1908	0
ZH38T0006766	TSS	ENSG00000107833.10	NPM3	protein_coding	0.988437	54024	324	308	0
ZH38T0010076	TSS	ENSG00000109971.14	HSPA8	protein_coding	0.988433	22730	39	227	0
ZH38T0000815	TSS	ENSG00000131914.11	LIN28A	protein_coding	0.988415	24060	92	190	0
ZH38T0031395	TSS	ENSG00000101187.16	SLCO4A1	protein_coding	0.988389	19409	184	44	0
ZH38T0027582	TSS	ENSG00000135624.16	CCT7	protein_coding	0.988388	492656	3524	2260	4
ZH38T0025375	TSS	ENSG00000125743.10	SNRPD2	protein_coding	0.98838	874408	4904	5364	12
ZH38T0013338	TSS	ENSG00000189403.15	HMGB1	protein_coding	0.988345	1961114	15886	7204	36
ZH38T0051906	TSS	ENSG00000241343.9, ENSG00000257529.5	RPL36A , RPL36A-HNRNPH2	protein_coding, protein_coding	0.988344	970865	1755	9695	0
ZH38T0010246	TSS	ENSG00000166118.8	SPATA19	protein_coding	0.988337	4576	10	44	0
ZH38T0046576	TSS	ENSG00000090266.13	NDUFB2	protein_coding	0.988335	1136328	5020	8384	8
ZH38T0026885	TSS	ENSG00000119801.13	YPEL5	protein_coding	0.988312	642328	6316	1272	8
ZH38T0034093	TSS	ENSG00000172046.19	USP19	protein_coding	0.988297	33274	78	316	0
ZH38T0003043	TSS	ENSG00000188015.10	S100A3	protein_coding	0.988287	675	0	8	0
ZH38T0005337	TSS	ENSG00000107537.14	PHYH	protein_coding	0.988273	35395	404	16	0
ZH38T0001540	TSS	ENSG00000085831.15	TTC39A	protein_coding	0.988235	336	2	2	0
ZH38T0048133	TSS	ENSG00000156467.9	UQCRB	protein_coding	0.988209	1457346	9279	8106	3
ZH38T0007818	TSS	ENSG00000110321.17	EIF4G2	protein_coding	0.988201	6700	45	35	0
ZH38T0050232	TSS	ENSG00000136888.7	ATP6V1G1	protein_coding	0.988191	478992	2098	3626	0
ZH38T0021488	TSS	ENSG00000006282.21	SPATA20	protein_coding	0.988166	668	0	8	0
ZH38T0017829	TSS	ENSG00000140988.16	RPS2	protein_coding	0.988132	24895	10	289	0
ZH38T0012061	TSS	ENSG00000127328.21	RAB3IP	protein_coding	0.988121	109470	1154	156	6
ZH38T0021779	TSS	ENSG00000136488.15	CSH1	protein_coding	0.988095	1826	0	22	0
ZH38T0040146	TSS	ENSG00000181904.9	C5orf24	protein_coding	0.988091	39824	9	471	0
ZH38T0015925	TSS	ENSG00000211935.3	IGHV1-3	IG_V_gene	0.988082	8788	20	86	0
ZH38T0017892	TSS	ENSG00000167978.17	SRRM2	protein_coding	0.988079	7294	66	22	0
ZH38T0034061	TSS	ENSG00000010256.11	UQCRC1	protein_coding	0.988079	225449	1017	1701	2
ZH38T0020895	TSS	ENSG00000073584.20	SMARCE1	protein_coding	0.988077	1415498	2744	14336	0
ZH38T0018009	TSS	ENSG00000089486.17	CDIP1	protein_coding	0.988046	80340	456	516	0
ZH38T0050237	TSS	ENSG00000230601.6	TEX48	protein_coding	0.988038	1652	12	8	0
ZH38T0000191	TSS	ENSG00000097021.19	ACOT7	protein_coding	0.988031	11062	86	48	0
ZH38T0023891	TSS	ENSG00000130811.12	EIF3G	protein_coding	0.988027	193181	1572	768	1
ZH38T0049368	TSS	ENSG00000137098.13	SPAG8	protein_coding	0.988026	21042	207	48	0
ZH38T0004313	TSS	ENSG00000170498.9	KISS1	protein_coding	0.988024	660	2	6	0
ZH38T0030499	TSS	ENSG00000232838.4	PET117	protein_coding	0.988003	89438	24	1062	0
ZH38T0034175	TSS	ENSG00000186792.17, ENSG00000243477.5	HYAL3 , NAA80	protein_coding, protein_coding	0.987988	3948	0	48	0
ZH38T0010134	TSS	ENSG00000134910.13	STT3A	protein_coding	0.987982	726491	4660	4177	0
ZH38T0015556	TSS	ENSG00000066455.13	GOLGA5	protein_coding	0.987974	93819	166	976	0
ZH38T0000588	TSS	ENSG00000225986.1	UBXN10-AS1	lncRNA	0.987974	10844	56	76	0
ZH38T0028231	TSS	ENSG00000169607.13	CKAP2L	protein_coding	0.987964	37267	176	278	0
ZH38T0050733	TSS	ENSG00000122140.11	MRPS2	protein_coding	0.987961	55638	416	262	0
ZH38T0008750	TSS	ENSG00000173486.13, ENSG00000286264.1	FKBP2 , AP001453.5	protein_coding, protein_coding	0.987954	9186	26	86	0
ZH38T0037090	TSS	ENSG00000171195.11	MUC7	protein_coding	0.987933	18585	94	133	0
ZH38T0001069	TSS	ENSG00000243749.1, ENSG00000284773.1	TMEM35B , AC114490.3	protein_coding, protein_coding	0.987909	122398	1378	120	0
ZH38T0014039	TSS	ENSG00000102452.17	NALCN	protein_coding	0.98789	4976	53	8	0
ZH38T0027883	TSS	ENSG00000241244.1	IGKV1D-16	IG_V_gene	0.987882	1712	0	21	0
ZH38T0032080	TSS	ENSG00000142173.15	COL6A2	protein_coding	0.987878	13854	10	160	0
ZH38T0002970	TSS	ENSG00000159450.12	TCHH	protein_coding	0.98786	3499	10	33	0
ZH38T0035608	TSS	ENSG00000196549.10	MME	protein_coding	0.987859	26526	298	28	0
ZH38T0019740	TSS	ENSG00000127774.7	EMC6	protein_coding	0.987848	62025	2	761	0
ZH38T0000071	TSS	ENSG00000248333.8	CDK11B	protein_coding	0.987831	355542	2370	2010	0
ZH38T0048701	TSS	ENSG00000014164.7	ZC3H3	protein_coding	0.987818	8514	6	99	0
ZH38T0023207	TSS	ENSG00000206073.10	SERPINB4	protein_coding	0.987777	16567	100	104	1
ZH38T0023308	TSS	ENSG00000130856.16	ZNF236	protein_coding	0.987768	15262	173	16	0
ZH38T0043827	TSS	ENSG00000146386.8	ABRACL	protein_coding	0.987757	223486	602	2168	0
ZH38T0037993	TSS	ENSG00000153130.17	SCOC	protein_coding	0.987737	253082	690	2449	3
ZH38T0029982	TSS	ENSG00000182600.9	SNORC	protein_coding	0.98773	644	2	6	0
ZH38T0002024	TSS	ENSG00000097033.14	SH3GLB1	protein_coding	0.987715	120438	1181	317	0
ZH38T0024300	TSS	ENSG00000130312.6	MRPL34	protein_coding	0.987712	102481	7	1267	1
ZH38T0025232	TSS	ENSG00000131116.12	ZNF428	protein_coding	0.987699	95554	1046	144	0
ZH38T0038345	TSS	ENSG00000164104.11	HMGB2	protein_coding	0.98769	238701	250	2725	0
ZH38T0026761	TSS	ENSG00000138028.16	CGREF1	protein_coding	0.987685	1604	12	4	4
ZH38T0005757	TSS	ENSG00000169813.16	HNRNPF	protein_coding	0.987668	26189	264	63	0
ZH38T0025026	TSS	ENSG00000105221.17	AKT2	protein_coding	0.987668	113724	820	600	0
ZH38T0006321	TSS	ENSG00000122378.14	PRXL2A	protein_coding	0.987664	16893	120	91	0
ZH38T0030383	TSS	ENSG00000089199.10	CHGB	protein_coding	0.987649	59016	175	563	0
ZH38T0025302	TSS	ENSG00000130203.10	APOE	protein_coding	0.987638	132458	1015	643	0
ZH38T0000339	TSS	ENSG00000171824.14	EXOSC10	protein_coding	0.987637	277196	2102	1366	2
ZH38T0005687	TSS	ENSG00000150093.19	ITGB1	protein_coding	0.987608	487974	5133	983	7
ZH38T0020332	TSS	ENSG00000154016.13	GRAP	protein_coding	0.987599	5495	59	10	0
ZH38T0022105	TSS	ENSG00000132471.12	WBP2	protein_coding	0.987568	485520	4384	1724	4
ZH38T0040133	TSS	ENSG00000152700.14	SAR1B	protein_coding	0.987545	4916	6	56	0
ZH38T0051964	TSS	ENSG00000196507.11	TCEAL3	protein_coding	0.987533	451494	3982	1718	0
ZH38T0017677	TSS	ENSG00000131871.15	SELENOS	protein_coding	0.987515	387090	3006	1888	0
ZH38T0022399	TSS	ENSG00000141552.17	ANAPC11	protein_coding	0.987487	1103704	2828	11158	0
ZH38T0033071	TSS	ENSG00000100300.18	TSPO	protein_coding	0.987483	228160	1902	984	6
ZH38T0000150	TSS	ENSG00000078900.15	TP73	protein_coding	0.987483	2130	27	0	0
ZH38T0005863	TSS	ENSG00000099290.17	WASHC2A	protein_coding	0.987479	421764	1316	4032	0
ZH38T0050505	TSS	ENSG00000136811.16	ODF2	protein_coding	0.987451	90802	1122	32	0
ZH38T0044720	TSS	ENSG00000122565.19	CBX3	protein_coding	0.987449	709356	1940	7076	0
ZH38T0018889	TSS	ENSG00000198417.7	MT1F	protein_coding	0.98742	73235	414	519	0
ZH38T0024159	TSS	ENSG00000104979.9	C19orf53	protein_coding	0.987412	207323	838	1805	0
ZH38T0023741	TSS	ENSG00000125733.18	TRIP10	protein_coding	0.987391	140958	1089	711	0
ZH38T0042109	TSS	ENSG00000204469.12	PRRC2A	protein_coding	0.987383	260916	1564	1770	0
ZH38T0007178	TSS	ENSG00000182022.18	CHST15	protein_coding	0.987374	19472	173	76	0
ZH38T0011675	TSS	ENSG00000135441.7, ENSG00000258311.5	BLOC1S1 , AC009779.3	protein_coding, protein_coding	0.987355	1256077	2211	13875	0
ZH38T0007397	TSS	ENSG00000177700.6	POLR2L	protein_coding	0.987347	60397	48	725	1
ZH38T0006972	TSS	ENSG00000108061.11	SHOC2	protein_coding	0.987319	57148	659	75	0
ZH38T0008383	TSS	ENSG00000149131.15	SERPING1	protein_coding	0.987315	1080636	260	13624	0
ZH38T0037414	TSS	ENSG00000029559.7	IBSP	protein_coding	0.987312	1245	3	13	0
ZH38T0025820	TSS	ENSG00000167748.11	KLK1	protein_coding	0.987309	4201	19	35	0
ZH38T0042712	TSS	ENSG00000096384.20	HSP90AB1	protein_coding	0.987299	852128	5224	5724	14
ZH38T0019097	TSS	ENSG00000039523.20	RIPOR1	protein_coding	0.987264	70621	597	311	3
ZH38T0035898	TSS	ENSG00000121879.5	PIK3CA	protein_coding	0.987263	3023	1	38	0
ZH38T0020159	TSS	ENSG00000125414.19	MYH2	protein_coding	0.987257	55160	216	496	0
ZH38T0014678	TSS	ENSG00000100902.10	PSMA6	protein_coding	0.987254	2711	10	25	0
ZH38T0007557	TSS	ENSG00000214026.11	MRPL23	protein_coding	0.987239	22280	284	0	4
ZH38T0050527	TSS	ENSG00000119335.16	SET	protein_coding	0.987179	1309	2	15	0
ZH38T0027814	TSS	ENSG00000153563.15	CD8A	protein_coding	0.987171	9234	4	116	0
ZH38T0000408	TSS	ENSG00000116731.22	PRDM2	protein_coding	0.987168	279404	3120	464	48
ZH38T0049196	TSS	ENSG00000233554.6	B4GALT1-AS1	lncRNA	0.987165	5999	11	67	0
ZH38T0036825	TSS	ENSG00000154277.12	UCHL1	protein_coding	0.987164	279245	1544	2071	16
ZH38T0027020	TSS	ENSG00000188010.14	MORN2	protein_coding	0.987162	490422	2982	3396	0
ZH38T0041199	TSS	ENSG00000250222.2	AC008443.5	lncRNA	0.987158	3459	6	39	0
ZH38T0041175	TSS	ENSG00000037280.16	FLT4	protein_coding	0.987139	26096	296	44	0
ZH38T0008738	TSS	ENSG00000168439.16	STIP1	protein_coding	0.987124	367068	4593	195	0
ZH38T0011782	TSS	ENSG00000175336.10	APOF	protein_coding	0.987105	7272	0	95	0
ZH38T0019592	TSS	ENSG00000140995.16	DEF8	protein_coding	0.98709	654733	8072	491	0
ZH38T0027491	TSS	ENSG00000124380.11	SNRNP27	protein_coding	0.987087	377932	2540	2404	0
ZH38T0036464	TSS	ENSG00000168824.14	NSG1	protein_coding	0.987084	83916	378	720	0
ZH38T0030889	TSS	ENSG00000132792.19	CTNNBL1	protein_coding	0.98706	442258	2234	3564	0
ZH38T0034111	TSS	ENSG00000067560.12	RHOA	protein_coding	0.987048	907164	6621	5280	3
ZH38T0016485	TSS	ENSG00000166710.20	B2M	protein_coding	0.987047	1511532	3675	16158	3
ZH38T0047358	TSS	ENSG00000104290.11	FZD3	protein_coding	0.987017	28888	78	296	6
ZH38T0025404	TSS	ENSG00000188293.6	IGFL1	protein_coding	0.986999	911	1	11	0
ZH38T0019955	TSS	ENSG00000132507.18	EIF5A	protein_coding	0.986992	138396	1266	558	0
ZH38T0036418	TSS	ENSG00000087274.17	ADD1	protein_coding	0.986971	240204	2358	813	0
ZH38T0000763	TSS	ENSG00000117616.18	RSRP1	protein_coding	0.986966	104800	100	1284	0
ZH38T0009354	TSS	ENSG00000151364.17	KCTD14	protein_coding	0.986938	6876	6	85	0
ZH38T0020836	TSS	ENSG00000172057.10	ORMDL3	protein_coding	0.986907	187844	912	1580	0
ZH38T0032690	TSS	ENSG00000198125.13	MB	protein_coding	0.9869	904	11	1	0
ZH38T0007532	TSS	ENSG00000130598.16	TNNI2	protein_coding	0.986854	37309	393	104	0
ZH38T0023959	TSS	ENSG00000214212.9	C19orf38	protein_coding	0.986846	3301	28	16	0
ZH38T0012865	TSS	ENSG00000248008.3	NRAV	lncRNA	0.986846	17855	22	216	0
ZH38T0017851	TSS	ENSG00000131653.13	TRAF7	protein_coding	0.986838	80524	1032	42	0
ZH38T0012992	TSS	ENSG00000139697.14	SBNO1	protein_coding	0.986809	179544	831	1569	0
ZH38T0045533	TSS	ENSG00000164647.9	STEAP1	protein_coding	0.986787	52202	147	551	1
ZH38T0020624	TSS	ENSG00000006042.12	TMEM98	protein_coding	0.986779	59114	784	8	0
ZH38T0024656	TSS	ENSG00000266964.5	FXYD1	protein_coding	0.986762	26313	92	261	0
ZH38T0019223	TSS	ENSG00000260520.1	AC010547.3	lncRNA	0.986733	595	0	8	0
ZH38T0012665	TSS	ENSG00000111229.16	ARPC3	protein_coding	0.986733	428905	3895	1866	6
ZH38T0019123	TSS	ENSG00000188038.8	NRN1L	protein_coding	0.986731	818	3	8	0
ZH38T0004000	TSS	ENSG00000121481.11	RNF2	protein_coding	0.986718	150368	1688	336	0
ZH38T0007101	TSS	ENSG00000148908.15	RGS10	protein_coding	0.986717	116622	1331	237	2
ZH38T0004491	TSS	ENSG00000123689.6	G0S2	protein_coding	0.986703	203318	11	2728	1
ZH38T0015581	TSS	ENSG00000133958.13	UNC79	protein_coding	0.986689	4151	38	18	0
ZH38T0010601	TSS	ENSG00000111701.7	APOBEC1	protein_coding	0.986662	2737	12	25	0
ZH38T0002422	TSS	ENSG00000155366.16	RHOC	protein_coding	0.986657	791005	5766	4931	0
ZH38T0037998	TSS	ENSG00000179387.10	ELMOD2	protein_coding	0.986617	151720	1764	288	6
ZH38T0035358	TSS	ENSG00000175110.11	MRPS22	protein_coding	0.986607	613500	3988	4338	2
ZH38T0013239	TSS	ENSG00000240654.6	C1QTNF9	protein_coding	0.986589	3899	28	25	0
ZH38T0031635	TSS	ENSG00000232079.7	LINC01697	lncRNA	0.986577	3234	15	29	0
ZH38T0043520	TSS	ENSG00000152661.9	GJA1	protein_coding	0.986572	218804	4	2972	2
ZH38T0034412	TSS	ENSG00000114405.10	C3orf14	protein_coding	0.986563	1909	24	2	0
ZH38T0000335	TSS	ENSG00000009724.16	MASP2	protein_coding	0.986544	18622	74	180	0
ZH38T0045941	TSS	ENSG00000160991.16	ORAI2	protein_coding	0.986542	8650	114	4	0
ZH38T0032136	TSS	ENSG00000172967.7	XKR3	protein_coding	0.986532	293	2	2	0
ZH38T0019775	TSS	ENSG00000188176.12	SMTNL2	protein_coding	0.986511	1097	9	6	0
ZH38T0034391	TSS	ENSG00000168309.18	FAM107A	protein_coding	0.986495	1534	3	18	0
ZH38T0030468	TSS	ENSG00000125868.16	DSTN	protein_coding	0.98645	1355378	13118	5486	14
ZH38T0045944	TSS	ENSG00000005075.15	POLR2J	protein_coding	0.986414	231908	2406	788	0
ZH38T0007657	TSS	ENSG00000223609.11	HBD	protein_coding	0.986411	3194	2	42	0
ZH38T0052153	TSS	ENSG00000125354.23	2021-09-06	protein_coding	0.986409	68588	737	207	1
ZH38T0026059	TSS	ENSG00000022556.16	NLRP2	protein_coding	0.986404	8416	108	8	0
ZH38T0024875	TSS	ENSG00000167645.17	YIF1B	protein_coding	0.986401	71372	924	60	0
ZH38T0022531	TSS	ENSG00000101608.12	MYL12A	protein_coding	0.986389	169580	1062	1278	0
ZH38T0019545	TSS	ENSG00000176715.16	ACSF3	protein_coding	0.986386	25938	294	64	0
ZH38T0048469	TSS	ENSG00000147684.9	NDUFB9	protein_coding	0.986381	1615952	4168	18140	4
ZH38T0023696	TSS	ENSG00000125656.10	CLPP	protein_coding	0.986376	17303	46	193	0
ZH38T0031375	TSS	ENSG00000130706.13	ADRM1	protein_coding	0.98634	275830	2988	832	0
ZH38T0045179	TSS	ENSG00000146729.10	NIPSNAP2	protein_coding	0.986339	6498	88	2	0
ZH38T0036457	TSS	ENSG00000145220.14	LYAR	protein_coding	0.986319	61641	384	471	0
ZH38T0000990	TSS	ENSG00000160050.14	CCDC28B	protein_coding	0.986302	32474	208	243	0
ZH38T0021397	TSS	ENSG00000167085.11	PHB	protein_coding	0.98626	384535	2160	3197	0
ZH38T0017778	TSS	ENSG00000103275.20	UBE2I	protein_coding	0.986245	5736	24	56	0
ZH38T0009978	TSS	ENSG00000149428.19	HYOU1	protein_coding	0.986239	424500	2779	3144	0
ZH38T0026324	TSS	ENSG00000151353.15	TMEM18	protein_coding	0.986236	85408	909	283	0
ZH38T0017940	TSS	ENSG00000103145.10	HCFC1R1	protein_coding	0.986204	72698	13	1004	0
ZH38T0021530	TSS	ENSG00000011052.21, ENSG00000239672.7	NME1-NME2 , NME1	protein_coding, protein_coding	0.986201	1171512	5672	10712	8
ZH38T0048719	TSS	ENSG00000104529.17	EEF1D	protein_coding	0.98619	1400119	7070	12537	0
ZH38T0047250	TSS	ENSG00000197217.13	ENTPD4	protein_coding	0.986185	269625	2202	1575	0
ZH38T0048263	TSS	ENSG00000164934.14	DCAF13	protein_coding	0.98615	1007680	9284	4868	0
ZH38T0040178	TSS	ENSG00000120729.9	MYOT	protein_coding	0.986148	104010	411	1050	0
ZH38T0009686	TSS	ENSG00000185742.6	C11orf87	protein_coding	0.986137	1067	0	15	0
ZH38T0052492	TSS	ENSG00000177854.8	TMEM187	protein_coding	0.986119	3410	28	20	0
ZH38T0019056	TSS	ENSG00000140939.14	AC074143.1	protein_coding	0.986103	8515	3	117	0
ZH38T0030355	TSS	ENSG00000171864.5	PRND	protein_coding	0.986095	11276	15	144	0
ZH38T0051916	TSS	ENSG00000198960.11	ARMCX6	protein_coding	0.986086	158542	132	2105	0
ZH38T0021182	TSS	ENSG00000180336.18	MEIOC	protein_coding	0.986083	496	0	7	0
ZH38T0051526	TSS	ENSG00000179222.17	MAGED1	protein_coding	0.986075	249822	300	3228	0
ZH38T0027461	TSS	ENSG00000169605.5	GKN1	protein_coding	0.986062	31057	124	314	1
ZH38T0030514	TSS	ENSG00000125821.12	DTD1	protein_coding	0.986053	89932	612	660	0
ZH38T0019165	TSS	ENSG00000062038.14	CDH3	protein_coding	0.986046	18302	86	173	0
ZH38T0027757	TSS	ENSG00000042493.16	CAPG	protein_coding	0.986029	29360	274	142	0
ZH38T0005336	TSS	ENSG00000165623.10	UCMA	protein_coding	0.986003	1268	2	16	0
ZH38T0002524	TSS	ENSG00000143061.17	IGSF3	protein_coding	0.985999	36058	112	400	0
ZH38T0036047	TSS	ENSG00000113838.13	TBCCD1	protein_coding	0.985989	22519	80	240	0
ZH38T0032342	TSS	ENSG00000211663.2, ENSG00000211677.2, ENSG00000211679.2	IGLV3-19 , IGLC2 , IGLC3	IG_V_gene, IG_C_gene, IG_C_gene	0.985986	9780	2	137	0
ZH38T0017935	TSS	ENSG00000184697.7	CLDN6	protein_coding	0.985985	2392	24	10	0
ZH38T0001587	TSS	ENSG00000174348.13	PODN	protein_coding	0.985975	70233	822	177	0
ZH38T0030091	TSS	ENSG00000177483.11	RBM44	protein_coding	0.985959	632	2	7	0
ZH38T0024668	TSS	ENSG00000105699.16	LSR	protein_coding	0.985946	66504	408	540	0
ZH38T0040407	TSS	ENSG00000120318.16	ARAP3	protein_coding	0.985944	30724	136	300	2
ZH38T0004471	TSS	ENSG00000174059.16	CD34	protein_coding	0.985937	214256	360	2696	0
ZH38T0011851	TSS	ENSG00000185633.10	NDUFA4L2	protein_coding	0.985917	14842	1	211	0
ZH38T0003030	TSS	ENSG00000163220.11	S100A9	protein_coding	0.985864	70995	54	964	0
ZH38T0008747	TSS	ENSG00000173486.13, ENSG00000286264.1	FKBP2 , AP001453.5	protein_coding, protein_coding	0.985843	884059	4980	7715	0
ZH38T0009183	TSS	ENSG00000149357.10	LAMTOR1	protein_coding	0.985842	770424	1336	9728	0
ZH38T0051238	TSS	ENSG00000130741.11	EIF2S3	protein_coding	0.98584	73591	519	538	0
ZH38T0050736	TSS	ENSG00000160349.9	LCN1	protein_coding	0.985831	5566	38	42	0
ZH38T0045390	TSS	ENSG00000106211.9	HSPB1	protein_coding	0.985813	43984	0	633	0
ZH38T0008769	TSS	ENSG00000173264.14	GPR137	protein_coding	0.985803	2222	3	29	0
ZH38T0024664	TSS	ENSG00000089327.14	FXYD5	protein_coding	0.985802	1153962	8820	7800	0
ZH38T0030186	TSS	ENSG00000115694.15	STK25	protein_coding	0.985794	64536	609	321	0
ZH38T0024587	TSS	ENSG00000153879.9	CEBPG	protein_coding	0.985786	47437	76	607	1
ZH38T0047393	TSS	ENSG00000104671.8	DCTN6	protein_coding	0.985776	219144	2942	220	0
ZH38T0006036	TSS	ENSG00000060339.14	CCAR1	protein_coding	0.985763	396957	2850	2883	0
ZH38T0003420	TSS	ENSG00000179639.10	FCER1A	protein_coding	0.985752	1868	7	20	0
ZH38T0010463	TSS	ENSG00000111640.15	GAPDH	protein_coding	0.985728	1261032	14385	3831	42
ZH38T0005279	TSS	ENSG00000107485.18	GATA3	protein_coding	0.985724	1450	0	21	0
ZH38T0020351	TSS	ENSG00000166482.11	MFAP4	protein_coding	0.985717	101728	522	952	0
ZH38T0002486	TSS	ENSG00000173218.15	VANGL1	protein_coding	0.985708	13656	194	4	0
ZH38T0016715	TSS	ENSG00000140262.17	TCF12	protein_coding	0.985704	39300	279	291	0
ZH38T0034206	TSS	ENSG00000145050.17	MANF	protein_coding	0.98568	37995	62	490	0
ZH38T0020226	TSS	ENSG00000170315.13	UBB	protein_coding	0.98567	16921	5	241	0
ZH38T0018670	TSS	ENSG00000103549.21	RNF40	protein_coding	0.985639	69318	70	938	2
ZH38T0046825	TSS	ENSG00000186480.13	INSIG1	protein_coding	0.985638	27588	32	370	0
ZH38T0006448	TSS	ENSG00000185745.10	IFIT1	protein_coding	0.985635	23328	92	248	0
ZH38T0047702	TSS	ENSG00000181195.11	PENK	protein_coding	0.985617	64276	306	632	0
ZH38T0031606	TSS	ENSG00000154727.10	GABPA	protein_coding	0.985614	38434	111	450	0
ZH38T0022013	TSS	ENSG00000183034.12	OTOP2	protein_coding	0.985612	822	0	12	0
ZH38T0001706	TSS	ENSG00000162598.13	C1orf87	protein_coding	0.985599	5886	80	6	0
ZH38T0004598	TSS	ENSG00000092978.11	GPATCH2	protein_coding	0.985554	159094	146	2186	0
ZH38T0020112	TSS	ENSG00000161970.15, ENSG00000263809.1	RPL26 , AC135178.2	protein_coding, protein_coding	0.985539	4266571	27564	35003	36
ZH38T0001173	TSS	ENSG00000168653.11	NDUFS5	protein_coding	0.985522	1304072	16682	2476	0
ZH38T0033397	TSS	ENSG00000157017.15	GHRL	protein_coding	0.985507	2380	7	28	0
ZH38T0012645	TSS	ENSG00000139437.18	TCHP	protein_coding	0.985495	61351	716	187	0
ZH38T0001586	TSS	ENSG00000116171.18	SCP2	protein_coding	0.985471	733108	7908	2900	0
ZH38T0022372	TSS	ENSG00000185359.13	HGS	protein_coding	0.985456	104953	1121	428	0
ZH38T0043467	TSS	ENSG00000188820.13	CALHM6	protein_coding	0.985437	1218	0	18	0
ZH38T0043086	TSS	ENSG00000083097.14	DOP1A	protein_coding	0.985422	220370	1260	1992	8
ZH38T0015822	TSS	ENSG00000156411.9	ATP5MPL	protein_coding	0.985407	2139754	5694	25988	6
ZH38T0027167	TSS	ENSG00000116062.15	MSH6	protein_coding	0.985381	2157	8	24	0
ZH38T0047300	TSS	ENSG00000104765.16	BNIP3L	protein_coding	0.985347	13785	130	75	0
ZH38T0030692	TSS	ENSG00000101367.9	MAPRE1	protein_coding	0.985338	87631	1300	4	0
ZH38T0048255	TSS	ENSG00000164929.17	BAALC	protein_coding	0.985294	7906	38	78	2
ZH38T0003708	TSS	ENSG00000174175.17	SELP	protein_coding	0.98529	10650	69	90	0
ZH38T0019151	TSS	ENSG00000103064.15	SLC7A6	protein_coding	0.985284	110877	1353	303	0
ZH38T0006124	TSS	ENSG00000197746.14	PSAP	protein_coding	0.985284	1084206	7113	9081	0
ZH38T0051347	TSS	ENSG00000147044.21	CASK	protein_coding	0.985272	669	5	5	0
ZH38T0038324	TSS	ENSG00000056050.7	HPF1	protein_coding	0.985252	84576	320	946	0
ZH38T0005334	TSS	ENSG00000065328.16	MCM10	protein_coding	0.98522	39728	572	24	0
ZH38T0040311	TSS	ENSG00000170458.14	CD14	protein_coding	0.985205	23174	0	348	0
ZH38T0008471	TSS	ENSG00000166889.14	PATL1	protein_coding	0.985204	3529	31	22	0
ZH38T0032871	TSS	ENSG00000100242.15, ENSG00000100246.13	SUN2 , DNAL4	protein_coding, protein_coding	0.985187	135675	2022	18	0
ZH38T0009048	TSS	ENSG00000172725.14	CORO1B	protein_coding	0.985174	61002	898	20	0
ZH38T0013769	TSS	ENSG00000139734.18	DIAPH3	protein_coding	0.985163	664	4	6	0
ZH38T0009288	TSS	ENSG00000149273.15	RPS3	protein_coding	0.98516	1865822	9555	18543	7
ZH38T0028815	TSS	ENSG00000236283.5	AC019197.1	lncRNA	0.985154	11414	76	96	0
ZH38T0009661	TSS	ENSG00000170290.4	SLN	protein_coding	0.985141	45813	330	354	7
ZH38T0018605	TSS	ENSG00000180209.11	MYLPF	protein_coding	0.985141	37459	253	289	23
ZH38T0047247	TSS	ENSG00000104679.11	R3HCC1	protein_coding	0.985136	27174	111	299	0
ZH38T0049193	TSS	ENSG00000122692.9	SMU1	protein_coding	0.985114	182187	2025	727	1
ZH38T0051748	TSS	ENSG00000198034.11	RPS4X	protein_coding	0.985092	435926	3319	3278	0
ZH38T0040976	TSS	ENSG00000145920.15	CPLX2	protein_coding	0.985068	51722	54	730	0
ZH38T0016628	TSS	ENSG00000166477.13	LEO1	protein_coding	0.985052	254508	322	3540	0
ZH38T0025151	TSS	ENSG00000105372.7	RPS19	protein_coding	0.985046	3623	25	30	0
ZH38T0038344	TSS	ENSG00000164104.11	HMGB2	protein_coding	0.985017	26823	9	399	0
ZH38T0022284	TSS	ENSG00000167291.16	TBC1D16	protein_coding	0.984998	5975	90	1	0
ZH38T0016999	TSS	ENSG00000137807.15	AC027237.1	protein_coding	0.984988	158780	1924	496	0
ZH38T0051586	TSS	ENSG00000102316.17	MAGED2	protein_coding	0.984974	153189	561	1773	3
ZH38T0027540	TSS	ENSG00000124383.9	MPHOSPH10	protein_coding	0.984936	208972	24	3172	0
ZH38T0025007	TSS	ENSG00000275395.6	FCGBP	protein_coding	0.984928	19408	0	297	0
ZH38T0045009	TSS	ENSG00000062582.14	MRPS24	protein_coding	0.984928	207343	186	2987	0
ZH38T0025788	TSS	ENSG00000086967.10	MYBPC2	protein_coding	0.984925	9016	120	18	0
ZH38T0007265	TSS	ENSG00000198546.15, ENSG00000283496.1	ZNF511 , ZNF511-PRAP1	protein_coding, protein_coding	0.984925	1568	1	23	0
ZH38T0012507	TSS	ENSG00000120837.8	NFYB	protein_coding	0.984854	147864	1982	292	0
ZH38T0023007	TSS	ENSG00000177576.11	C18orf32	protein_coding	0.984836	298482	1446	3150	0
ZH38T0038536	TSS	ENSG00000164342.12	TLR3	protein_coding	0.984822	12912	10	189	0
ZH38T0030695	TSS	ENSG00000078898.7	BPIFB2	protein_coding	0.984816	2270	29	6	0
ZH38T0041469	TSS	ENSG00000111843.14	TMEM14C	protein_coding	0.984796	182333	1400	1415	0
ZH38T0040471	TSS	ENSG00000113649.11	TCERG1	protein_coding	0.984783	158938	1252	1204	0
ZH38T0004833	TSS	ENSG00000177788.6	AL162595.1	lncRNA	0.984768	13318	108	98	0
ZH38T0024927	TSS	ENSG00000104823.9	ECH1	protein_coding	0.984755	82230	495	778	0
ZH38T0011696	TSS	ENSG00000135392.16	DNAJC14	protein_coding	0.98472	5091	1	78	0
ZH38T0021146	TSS	ENSG00000161654.9	LSM12	protein_coding	0.984705	103913	748	866	0
ZH38T0021635	TSS	ENSG00000108387.14	2021-09-04	protein_coding	0.984685	26040	168	237	0
ZH38T0017059	TSS	ENSG00000067225.18	PKM	protein_coding	0.984685	14466	36	189	0
ZH38T0006267	TSS	ENSG00000138326.20	RPS24	protein_coding	0.984657	4880953	74494	1526	35
ZH38T0002860	TSS	ENSG00000143387.13	CTSK	protein_coding	0.984649	21424	143	191	0
ZH38T0009662	TSS	ENSG00000170290.4	SLN	protein_coding	0.984639	5128	54	26	0
ZH38T0030726	TSS	ENSG00000125971.16	DYNLRB1	protein_coding	0.984632	254871	2619	1359	0
ZH38T0047566	TSS	ENSG00000078668.14	VDAC3	protein_coding	0.984629	718551	10950	258	9
ZH38T0028920	TSS	ENSG00000077380.15	DYNC1I2	protein_coding	0.984629	2432664	27632	10336	8
ZH38T0011783	TSS	ENSG00000111602.12	TIMELESS	protein_coding	0.984614	69370	492	588	4
ZH38T0044953	TSS	ENSG00000006451.8	RALA	protein_coding	0.984607	156779	494	1954	3
ZH38T0012012	TSS	ENSG00000139233.7	LLPH	protein_coding	0.984578	218082	1026	2390	0
ZH38T0022321	TSS	ENSG00000176108.9	CHMP6	protein_coding	0.984567	34768	422	123	0
ZH38T0035858	TSS	ENSG00000144962.7	SPATA16	protein_coding	0.98454	2420	14	24	0
ZH38T0030462	TSS	ENSG00000125870.11	SNRPB2	protein_coding	0.984507	274002	2624	1684	4
ZH38T0023577	TSS	ENSG00000105229.7	PIAS4	protein_coding	0.984498	42614	610	61	0
ZH38T0032165	TSS	ENSG00000015475.18	BID	protein_coding	0.98449	288372	3983	560	0
ZH38T0047883	TSS	ENSG00000154582.16	ELOC	protein_coding	0.984481	886092	6912	7032	24
ZH38T0004789	TSS	ENSG00000143740.14	SNAP47	protein_coding	0.984481	20046	103	213	0
ZH38T0029386	TSS	ENSG00000082146.13	STRADB	protein_coding	0.984472	5072	67	13	0
ZH38T0052060	TSS	ENSG00000101938.14	CHRDL1	protein_coding	0.984424	161800	1820	740	0
ZH38T0047665	TSS	ENSG00000082556.11	OPRK1	protein_coding	0.984424	948	2	13	0
ZH38T0031725	TSS	ENSG00000177692.11	DNAJC28	protein_coding	0.984386	19796	2	312	0
ZH38T0030851	TSS	ENSG00000101079.21	NDRG3	protein_coding	0.984377	153294	2376	57	0
ZH38T0015663	TSS	ENSG00000100744.15	GSKIP	protein_coding	0.984357	79600	912	353	0
ZH38T0047219	TSS	ENSG00000120913.23, ENSG00000248235.6	PDLIM2 , AC037459.1	protein_coding, protein_coding	0.984355	98910	144	1428	0
ZH38T0007573	TSS	ENSG00000167244.21	IGF2	protein_coding	0.984349	12264	93	102	0
ZH38T0045577	TSS	ENSG00000001630.17	CYP51A1	protein_coding	0.984341	14647	57	176	0
ZH38T0033897	TSS	ENSG00000160746.12	ANO10	protein_coding	0.984335	283016	1696	2808	0
ZH38T0002653	TSS	ENSG00000131788.16	PIAS3	protein_coding	0.984334	17844	100	184	0
ZH38T0030207	TSS	ENSG00000216921.8	FAM240C	protein_coding	0.984326	628	3	7	0
ZH38T0047729	TSS	ENSG00000167912.6	AC090152.1	lncRNA	0.984317	3703	2	57	0
ZH38T0025248	TSS	ENSG00000159871.15	LYPD5	protein_coding	0.984305	3512	32	24	0
ZH38T0003675	TSS	ENSG00000143164.15	DCAF6	protein_coding	0.984301	14671	175	59	0
ZH38T0009749	TSS	ENSG00000109846.8	CRYAB	protein_coding	0.984293	2068	5	28	0
ZH38T0031752	TSS	ENSG00000198743.7, ENSG00000243927.6, ENSG00000272657.1	SLC5A3 , MRPS6 , AP000317.2	protein_coding, protein_coding, lncRNA	0.984288	190938	588	2460	0
ZH38T0042074	TSS	ENSG00000234745.11	HLA-B	protein_coding	0.984266	202814	252	2990	0
ZH38T0019324	TSS	ENSG00000034713.8	GABARAPL2	protein_coding	0.98426	363552	822	4992	0
ZH38T0009085	TSS	ENSG00000110717.13	NDUFS8	protein_coding	0.984259	345156	4218	1302	0
ZH38T0030372	TSS	ENSG00000132646.11	PCNA	protein_coding	0.984253	16251	80	180	0
ZH38T0008783	TSS	ENSG00000168071.22	CCDC88B	protein_coding	0.98425	8249	13	119	0
ZH38T0017322	TSS	ENSG00000284803.1	AC245033.4	lncRNA	0.984249	43742	4	695	1
ZH38T0016936	TSS	ENSG00000174446.13	SNAPC5	protein_coding	0.984234	664210	1435	9200	5
ZH38T0009312	TSS	ENSG00000158636.16	EMSY	protein_coding	0.984213	255111	3243	849	0
ZH38T0047548	TSS	ENSG00000158669.11	GPAT4	protein_coding	0.98421	10783	160	13	0
ZH38T0020162	TSS	ENSG00000170222.11	ADPRM	protein_coding	0.984209	15644	227	24	0
ZH38T0050225	TSS	ENSG00000229314.5	ORM1	protein_coding	0.98412	67238	279	806	0
ZH38T0022704	TSS	ENSG00000101654.17	RNMT	protein_coding	0.984112	167799	1167	1542	0
ZH38T0024021	TSS	ENSG00000130165.10	ELOF1	protein_coding	0.984104	127596	1056	1005	0
ZH38T0049385	TSS	ENSG00000159921.16	GNE	protein_coding	0.984102	72672	452	718	4
ZH38T0026721	TSS	ENSG00000084754.12	HADHA	protein_coding	0.984086	600702	3060	6654	0
ZH38T0009889	TSS	ENSG00000167257.11	RNF214	protein_coding	0.984081	27261	414	27	0
ZH38T0052105	TSS	ENSG00000180772.7	AGTR2	protein_coding	0.984079	1298	2	19	0
ZH38T0031149	TSS	ENSG00000124207.17	CSE1L	protein_coding	0.984059	236804	2782	1054	0
ZH38T0023825	TSS	ENSG00000233927.5	RPS28	protein_coding	0.984052	213308	0	3456	1
ZH38T0006943	TSS	ENSG00000119950.21	MXI1	protein_coding	0.984049	4010	55	10	0
ZH38T0023658	TSS	ENSG00000174917.8	MICOS13	protein_coding	0.984037	129266	1444	652	1
ZH38T0012297	TSS	ENSG00000139329.5	LUM	protein_coding	0.98401	153538	13	2481	1
ZH38T0051008	TSS	ENSG00000223773.7	CD99P1	transcribed_unprocessed_pseudogene	0.984	6396	104	0	0
ZH38T0006213	TSS	ENSG00000156650.14	KAT6B	protein_coding	0.983987	4240	1	68	0
ZH38T0005262	TSS	ENSG00000123243.15	ITIH5	protein_coding	0.983956	126702	802	1262	2
ZH38T0030295	TSS	ENSG00000101365.21	IDH3B	protein_coding	0.983944	362780	3772	2148	0
ZH38T0045720	TSS	ENSG00000106244.13	PDAP1	protein_coding	0.98394	660100	7940	2832	2
ZH38T0029292	TSS	ENSG00000144381.17	HSPD1	protein_coding	0.98393	10776	80	96	0
ZH38T0009152	TSS	ENSG00000172893.15	DHCR7	protein_coding	0.983928	87298	282	1144	0
ZH38T0021574	TSS	ENSG00000153933.10	DGKE	protein_coding	0.983927	24486	372	28	0
ZH38T0051631	TSS	ENSG00000198881.10	ASB12	protein_coding	0.983927	857	1	13	0
ZH38T0019528	TSS	ENSG00000158545.15	ZC3H18	protein_coding	0.983903	61612	252	756	0
ZH38T0036225	TSS	ENSG00000189058.9	APOD	protein_coding	0.983897	144074	847	1510	1
ZH38T0007967	TSS	ENSG00000173432.12	SAA1	protein_coding	0.983879	256139	2472	1689	36
ZH38T0010842	TSS	ENSG00000111341.9	MGP	protein_coding	0.983871	541141	4910	3961	0
ZH38T0012668	TSS	ENSG00000204856.12	FAM216A	protein_coding	0.983845	45675	294	456	0
ZH38T0002362	TSS	ENSG00000143125.6	PROK1	protein_coding	0.983831	6389	24	81	0
ZH38T0039388	TSS	ENSG00000083312.17	TNPO1	protein_coding	0.983805	145065	1185	1203	0
ZH38T0024041	TSS	ENSG00000223547.10	ZNF844	protein_coding	0.983805	23934	250	144	0
ZH38T0035941	TSS	ENSG00000043093.14	DCUN1D1	protein_coding	0.983782	3943	38	27	0
ZH38T0013177	TSS	ENSG00000121743.4	GJA3	protein_coding	0.983776	4184	1	68	0
ZH38T0031222	TSS	ENSG00000020256.20	ZFP64	protein_coding	0.983762	177510	2000	930	0
ZH38T0051411	TSS	ENSG00000102265.12	TIMP1	protein_coding	0.983747	744534	6525	5767	9
ZH38T0002851	TSS	ENSG00000143420.18	ENSA	protein_coding	0.983739	35391	69	516	0
ZH38T0010571	TSS	ENSG00000159403.18	C1R	protein_coding	0.983738	217770	1542	2058	0
ZH38T0033251	TSS	ENSG00000205560.12	CPT1B	protein_coding	0.983727	32282	402	132	0
ZH38T0022598	TSS	ENSG00000266441.1	AP005205.2	lncRNA	0.983727	1209	15	5	0
ZH38T0037158	TSS	ENSG00000163735.7	CXCL5	protein_coding	0.983717	20662	0	342	0
ZH38T0011310	TSS	ENSG00000123416.15	TUBA1B	protein_coding	0.983717	198947	724	2561	8
ZH38T0018005	TSS	ENSG00000103415.12	HMOX2	protein_coding	0.983699	950826	5082	10674	0
ZH38T0050732	TSS	ENSG00000160345.13	C9orf116	protein_coding	0.983693	9109	31	120	0
ZH38T0017856	TSS	ENSG00000167965.18	MLST8	protein_coding	0.983674	38682	70	572	0
ZH38T0042101	TSS	ENSG00000204482.10	LST1	protein_coding	0.983649	24183	20	382	0
ZH38T0021133	TSS	ENSG00000161649.13	CD300LG	protein_coding	0.983648	32844	534	12	0
ZH38T0007990	TSS	ENSG00000179119.15	SPTY2D1	protein_coding	0.983639	69681	58	1101	0
ZH38T0023018	TSS	ENSG00000167315.18	ACAA2	protein_coding	0.983631	79142	665	651	1
ZH38T0039318	TSS	ENSG00000134056.12	MRPS36	protein_coding	0.983605	293370	402	4488	0
ZH38T0038921	TSS	ENSG00000082068.8	WDR70	protein_coding	0.983554	109440	1096	734	0
ZH38T0003521	TSS	ENSG00000158796.17	DEDD	protein_coding	0.983547	40410	176	500	0
ZH38T0008334	TSS	ENSG00000213619.10	NDUFS3	protein_coding	0.983509	367970	410	5760	0
ZH38T0033474	TSS	ENSG00000170860.4	LSM3	protein_coding	0.983499	141792	883	1496	0
ZH38T0000452	TSS	ENSG00000162458.13	FBLIM1	protein_coding	0.983466	19272	322	2	0
ZH38T0041937	TSS	ENSG00000206503.13	HLA-A	protein_coding	0.983459	253644	948	3078	240
ZH38T0009869	TSS	ENSG00000168092.14	PAFAH1B2	protein_coding	0.983458	955528	10556	5516	0
ZH38T0015924	TSS	ENSG00000211895.5, ENSG00000211896.7, ENSG00000211934.3	IGHA1 , IGHG1 , IGHV1-2	IG_C_gene, IG_C_gene, IG_V_gene	0.983448	8734	31	113	3
ZH38T0015614	TSS	ENSG00000188488.14	SERPINA5	protein_coding	0.983446	94460	150	1440	0
ZH38T0017862	TSS	ENSG00000205937.12	RNPS1	protein_coding	0.9834	561595	3465	6015	0
ZH38T0031476	TSS	ENSG00000275464.4	FP565260.1	protein_coding	0.983397	2073	32	3	0
ZH38T0051194	TSS	ENSG00000184368.16	MAP7D2	protein_coding	0.983391	35880	351	255	0
ZH38T0012716	TSS	ENSG00000089009.15	AC004086.1	protein_coding	0.983374	1364046	14484	8550	28
ZH38T0003276	TSS	ENSG00000163479.14	SSR2	protein_coding	0.983328	636268	7088	3700	0
ZH38T0004463	TSS	ENSG00000117335.19	CD46	protein_coding	0.983323	3864370	32200	33280	60
ZH38T0021163	TSS	ENSG00000108312.15	UBTF	protein_coding	0.983297	28787	122	367	0
ZH38T0013545	TSS	ENSG00000102804.15	TSC22D1	protein_coding	0.983285	7118	2	119	0
ZH38T0002889	TSS	ENSG00000163157.15	TMOD4	protein_coding	0.983282	8293	42	99	0
ZH38T0019589	TSS	ENSG00000258947.7	TUBB3	protein_coding	0.983262	175768	2528	464	0
ZH38T0015231	TSS	ENSG00000165861.14	ZFYVE1	protein_coding	0.983261	212172	24	3588	0
ZH38T0013196	TSS	ENSG00000150459.12	SAP18	protein_coding	0.983252	835722	2373	11862	0
ZH38T0000996	TSS	ENSG00000084623.11	EIF3I	protein_coding	0.983234	120335	1661	390	1
ZH38T0010873	TSS	ENSG00000008394.13	MGST1	protein_coding	0.983214	9782	92	75	0
ZH38T0027860	TSS	ENSG00000211592.8, ENSG00000240671.4, ENSG00000243290.3	IGKC , IGKV1-8 , IGKV1-12	IG_C_gene, IG_V_gene, IG_V_gene	0.983208	7202	21	102	0
ZH38T0002859	TSS	ENSG00000163131.11	CTSS	protein_coding	0.983207	95200	1460	166	0
ZH38T0046688	TSS	ENSG00000155660.11	PDIA4	protein_coding	0.983191	707772	850	11250	0
ZH38T0004139	TSS	ENSG00000162702.8	ZNF281	protein_coding	0.983191	31410	15	522	0
ZH38T0018397	TSS	ENSG00000004779.10	NDUFAB1	protein_coding	0.983187	649454	5516	5590	0
ZH38T0018962	TSS	ENSG00000103021.9	CCDC113	protein_coding	0.983175	141999	690	1740	0
ZH38T0001161	TSS	ENSG00000183386.10	FHL3	protein_coding	0.983151	5310	82	9	0
ZH38T0033891	TSS	ENSG00000163788.14	SNRK	protein_coding	0.983151	297120	4632	460	0
ZH38T0034445	TSS	ENSG00000163638.13	ADAMTS9	protein_coding	0.983115	4134	16	55	0
ZH38T0011565	TSS	ENSG00000197111.15	PCBP2	protein_coding	0.983074	54364	340	596	0
ZH38T0044214	TSS	ENSG00000130396.20	AFDN	protein_coding	0.983047	8350	88	56	0
ZH38T0046312	TSS	ENSG00000128595.17	CALU	protein_coding	0.983042	3282190	18985	37635	0
ZH38T0035305	TSS	ENSG00000073711.11	PPP2R3A	protein_coding	0.983028	48770	458	384	0
ZH38T0042122	TSS	ENSG00000204463.12	BAG6	protein_coding	0.983005	10122	9	166	0
ZH38T0023104	TSS	ENSG00000066926.11	FECH	protein_coding	0.982974	216787	3345	407	3
ZH38T0040165	TSS	ENSG00000113658.18	SMAD5	protein_coding	0.982962	284597	4113	820	0
ZH38T0033969	TSS	ENSG00000163827.13	LRRC2	protein_coding	0.982946	33084	431	143	0
ZH38T0018476	TSS	ENSG00000178952.11	TUFM	protein_coding	0.982943	229234	98	3880	0
ZH38T0001481	TSS	ENSG00000186118.8	TEX38	protein_coding	0.982936	8410	48	98	0
ZH38T0019372	TSS	ENSG00000140905.10, ENSG00000260643.2, ENSG00000284512.1	GCSH , AC092718.3 , AC092718.8	protein_coding, protein_coding, protein_coding	0.982935	44928	588	192	0
ZH38T0036548	TSS	ENSG00000071127.17	WDR1	protein_coding	0.982925	325596	1206	4450	0
ZH38T0050200	TSS	ENSG00000136875.12	PRPF4	protein_coding	0.982908	83329	449	1000	0
ZH38T0008846	TSS	ENSG00000133884.10	DPF2	protein_coding	0.982903	207132	3051	546	6
ZH38T0011758	TSS	ENSG00000139613.12	SMARCC2	protein_coding	0.98289	214844	1684	2056	0
ZH38T0030230	TSS	ENSG00000101255.11	TRIB3	protein_coding	0.982871	17501	43	262	0
ZH38T0024871	TSS	ENSG00000167644.12	C19orf33	protein_coding	0.98287	177815	78	3021	0
ZH38T0029255	TSS	ENSG00000196950.14	SLC39A10	protein_coding	0.982825	80172	228	1173	0
ZH38T0025468	TSS	ENSG00000105321.14	CCDC9	protein_coding	0.982812	64728	1026	106	0
ZH38T0018771	TSS	ENSG00000069345.12	DNAJA2	protein_coding	0.982811	194284	314	3083	1
ZH38T0013567	TSS	ENSG00000133112.16	TPT1	protein_coding	0.982777	3001799	2840	49761	5
ZH38T0032203	TSS	ENSG00000070010.19	UFD1	protein_coding	0.982761	134654	2278	84	0
ZH38T0016843	TSS	ENSG00000185088.14	RPS27L	protein_coding	0.982758	910507	2490	13484	0
ZH38T0003320	TSS	ENSG00000163467.11	TSACC	protein_coding	0.982752	44499	376	405	0
ZH38T0019326	TSS	ENSG00000065427.14	KARS	protein_coding	0.982714	335805	2223	3684	0
ZH38T0025342	TSS	ENSG00000012061.15	ERCC1	protein_coding	0.982708	60923	384	688	0
ZH38T0008660	TSS	ENSG00000168000.14	BSCL2	protein_coding	0.982693	186244	576	2704	0
ZH38T0028886	TSS	ENSG00000138385.16	SSB	protein_coding	0.982689	233308	3943	167	0
ZH38T0005775	TSS	ENSG00000107562.16	CXCL12	protein_coding	0.982687	6584	64	52	0
ZH38T0039723	TSS	ENSG00000164308.16	ERAP2	protein_coding	0.982685	21963	231	156	0
ZH38T0032403	TSS	ENSG00000099994.11	SUSD2	protein_coding	0.982648	19198	143	196	0
ZH38T0034121	TSS	ENSG00000164062.13	APEH	protein_coding	0.982648	63540	428	694	0
ZH38T0027017	TSS	ENSG00000152147.11	GEMIN6	protein_coding	0.982642	140736	1076	1410	0
ZH38T0023332	TSS	ENSG00000282508.2	LINC01002	lncRNA	0.982609	113	0	2	0
ZH38T0022771	TSS	ENSG00000154065.17	ANKRD29	protein_coding	0.982585	10720	176	14	0
ZH38T0030888	TSS	ENSG00000132792.19	CTNNBL1	protein_coding	0.982583	4062	8	64	0
ZH38T0024325	TSS	ENSG00000179913.10	B3GNT3	protein_coding	0.982582	26288	32	434	0
ZH38T0010940	TSS	ENSG00000121351.7	IAPP	protein_coding	0.982578	1128	4	16	0
ZH38T0013091	TSS	ENSG00000125207.7	PIWIL1	protein_coding	0.982578	4963	32	56	0
ZH38T0030195	TSS	ENSG00000180902.18	D2HGDH	protein_coding	0.982574	733	11	2	0
ZH38T0023892	TSS	ENSG00000130816.16	DNMT1	protein_coding	0.982572	108978	1556	376	1
ZH38T0026262	TSS	ENSG00000121410.11	A1BG	protein_coding	0.982565	9806	58	116	0
ZH38T0014647	TSS	ENSG00000165389.7	SPTSSA	protein_coding	0.982563	44290	18	768	0
ZH38T0042509	TSS	ENSG00000183826.18	BTBD9	protein_coding	0.982549	56754	680	328	0
ZH38T0001169	TSS	ENSG00000214114.9	MYCBP	protein_coding	0.982536	69762	164	1076	0
ZH38T0046780	TSS	ENSG00000013374.16	NUB1	protein_coding	0.982519	180870	3096	122	0
ZH38T0007267	TSS	ENSG00000130643.9	CALY	protein_coding	0.982507	23589	273	147	0
ZH38T0042174	TSS	ENSG00000204371.11	EHMT2	protein_coding	0.982499	20884	366	6	0
ZH38T0051907	TSS	ENSG00000241343.9	RPL36A	protein_coding	0.982497	5445	5	92	0
ZH38T0012201	TSS	ENSG00000139304.15	PTPRQ	protein_coding	0.982472	1065	13	6	0
ZH38T0024933	TSS	ENSG00000104824.17	HNRNPL	protein_coding	0.982464	11485	202	3	0
ZH38T0042639	TSS	ENSG00000124702.18	KLHDC3	protein_coding	0.982458	112014	742	1258	0
ZH38T0052251	TSS	ENSG00000147256.12	ARHGAP36	protein_coding	0.982456	1904	8	26	0
ZH38T0026125	TSS	ENSG00000108107.14	RPL28	protein_coding	0.982441	721658	480	12418	0
ZH38T0031427	TSS	ENSG00000125531.7	FNDC11	protein_coding	0.982425	559	0	10	0
ZH38T0032021	TSS	ENSG00000160255.18	ITGB2	protein_coding	0.98242	105508	1128	760	0
ZH38T0003112	TSS	ENSG00000143569.19	UBAP2L	protein_coding	0.982414	1620	10	19	0
ZH38T0022530	TSS	ENSG00000101608.12	MYL12A	protein_coding	0.982412	793826	1881	12331	0
ZH38T0011318	TSS	ENSG00000167552.14	TUBA1A	protein_coding	0.98241	413284	1248	6126	26
ZH38T0051703	TSS	ENSG00000169562.11	GJB1	protein_coding	0.982383	31785	30	540	0
ZH38T0033584	TSS	ENSG00000174748.21	RPL15	protein_coding	0.98238	1743399	3864	27405	0
ZH38T0012252	TSS	ENSG00000133636.11	NTS	protein_coding	0.98238	32560	102	482	0
ZH38T0023913	TSS	ENSG00000105401.9	CDC37	protein_coding	0.98237	892984	3206	12820	0
ZH38T0018923	TSS	ENSG00000102970.10	CCL17	protein_coding	0.982338	1168	13	8	0
ZH38T0001724	TSS	ENSG00000132849.20	PATJ	protein_coding	0.982317	345540	4168	2052	0
ZH38T0016693	TSS	ENSG00000256061.7, ENSG00000261771.5	DNAAF4 , DNAAF4-CCPG1	protein_coding, lncRNA	0.982313	129297	1152	1176	0
ZH38T0013500	TSS	ENSG00000179813.7	FAM216B	protein_coding	0.982304	6106	48	62	0
ZH38T0031029	TSS	ENSG00000204070.10	SYS1	protein_coding	0.982293	41828	302	452	0
ZH38T0019478	TSS	ENSG00000131143.8	COX4I1	protein_coding	0.982282	18073	281	45	0
ZH38T0018877	TSS	ENSG00000125148.7	MT2A	protein_coding	0.982281	565613	8	10191	4
ZH38T0051944	TSS	ENSG00000182916.8	TCEAL7	protein_coding	0.982281	72011	0	1299	0
ZH38T0016607	TSS	ENSG00000183578.7	TNFAIP8L3	protein_coding	0.982276	4212	31	45	0
ZH38T0028146	TSS	ENSG00000119147.10	C2orf40	protein_coding	0.982263	6867	51	73	0
ZH38T0038137	TSS	ENSG00000249818.2	AC097375.2	lncRNA	0.982258	609	6	5	0
ZH38T0010131	TSS	ENSG00000149557.13	FEZ1	protein_coding	0.982243	28819	90	431	0
ZH38T0032785	TSS	ENSG00000100097.12	LGALS1	protein_coding	0.982206	236583	3140	1146	0
ZH38T0011490	TSS	ENSG00000170421.12	KRT8	protein_coding	0.982143	495	4	5	0
ZH38T0013299	TSS	ENSG00000102755.12	FLT1	protein_coding	0.982143	275	2	3	0
ZH38T0002485	TSS	ENSG00000287103.1	AL512638.3	lncRNA	0.982143	220	1	3	0
ZH38T0029673	TSS	ENSG00000135926.15	TMBIM1	protein_coding	0.982122	260836	2384	2364	0
ZH38T0019956	TSS	ENSG00000132507.18	EIF5A	protein_coding	0.982092	45080	200	622	0
ZH38T0019476	TSS	ENSG00000131143.8	COX4I1	protein_coding	0.982072	2358128	41008	2040	0
ZH38T0012264	TSS	ENSG00000165805.10	C12orf50	protein_coding	0.982053	3502	50	14	0
ZH38T0026764	TSS	ENSG00000186143.11	PRR30	protein_coding	0.982043	1750	0	32	0
ZH38T0030306	TSS	ENSG00000101405.3	OXT	protein_coding	0.982043	875	0	16	0
ZH38T0020699	TSS	ENSG00000273611.5	ZNHIT3	protein_coding	0.98204	120458	1062	1141	0
ZH38T0014909	TSS	ENSG00000100528.12	CNIH1	protein_coding	0.981992	581040	7675	2980	0
ZH38T0037555	TSS	ENSG00000145358.6	DDIT4L	protein_coding	0.981992	4526	12	71	0
ZH38T0018074	TSS	ENSG00000153048.11	CARHSP1	protein_coding	0.981991	72302	892	434	0
ZH38T0019883	TSS	ENSG00000198920.11	KIAA0753	protein_coding	0.981877	78234	1234	210	0
ZH38T0000919	TSS	ENSG00000159023.21	EPB41	protein_coding	0.981875	392967	360	6894	0
ZH38T0042586	TSS	ENSG00000214736.7	TOMM6	protein_coding	0.981868	448590	1622	6658	4
ZH38T0005037	TSS	ENSG00000203667.10	COX20	protein_coding	0.981852	437849	1944	6147	2
ZH38T0008109	TSS	ENSG00000007372.23	PAX6	protein_coding	0.981818	216	2	2	0
ZH38T0041099	TSS	ENSG00000113240.13	CLK4	protein_coding	0.981815	690224	6964	5820	0
ZH38T0017813	TSS	ENSG00000095906.17	NUBP2	protein_coding	0.981787	123010	2259	23	0
ZH38T0031372	TSS	ENSG00000130703.16	OSBPL2	protein_coding	0.981776	664104	12292	35	0
ZH38T0003540	TSS	ENSG00000158869.11	FCER1G	protein_coding	0.981776	135976	1030	1492	2
ZH38T0001910	TSS	ENSG00000162614.18	NEXN	protein_coding	0.981774	542766	2554	7520	2
ZH38T0047031	TSS	ENSG00000164733.21	CTSB	protein_coding	0.981771	2191084	28252	12383	49
ZH38T0050562	TSS	ENSG00000119383.19, ENSG00000204055.4	PTPA , AL158151.1	protein_coding, lncRNA	0.981762	29606	190	360	0
ZH38T0020807	TSS	ENSG00000131771.14	PPP1R1B	protein_coding	0.981748	3550	2	64	0
ZH38T0011281	TSS	ENSG00000174243.10	DDX23	protein_coding	0.981747	118005	1836	358	0
ZH38T0012580	TSS	ENSG00000136003.15	ISCU	protein_coding	0.981724	1104204	4104	16452	0
ZH38T0008845	TSS	ENSG00000149798.5	CDC42EP2	protein_coding	0.981717	20780	5	382	0
ZH38T0027058	TSS	ENSG00000115944.15	COX7A2L	protein_coding	0.981699	356712	3192	3458	0
ZH38T0047432	TSS	ENSG00000198042.11	MAK16	protein_coding	0.981679	61728	656	496	0
ZH38T0016437	TSS	ENSG00000067369.13	TP53BP1	protein_coding	0.981679	210414	2841	1086	0
ZH38T0036342	TSS	ENSG00000215375.6	MYL5	protein_coding	0.981672	3053	51	6	0
ZH38T0018821	TSS	ENSG00000177200.17	CHD9	protein_coding	0.981661	36238	592	83	2
ZH38T0011680	TSS	ENSG00000135404.11	CD63	protein_coding	0.981627	8228	13	141	0
ZH38T0052200	TSS	ENSG00000101966.12	XIAP	protein_coding	0.981612	6833	35	93	0
ZH38T0047871	TSS	ENSG00000147604.14	RPL7	protein_coding	0.981593	1529658	5046	23638	0
ZH38T0007332	TSS	ENSG00000023191.17	RNH1	protein_coding	0.981583	263716	3280	1668	0
ZH38T0000047	TSS	ENSG00000127054.20	INTS11	protein_coding	0.981578	1293690	23040	1240	0
ZH38T0010356	TSS	ENSG00000004478.8	FKBP4	protein_coding	0.981574	20137	185	193	0
ZH38T0005760	TSS	ENSG00000169813.16	HNRNPF	protein_coding	0.981571	91079	679	1031	0
ZH38T0042371	TSS	ENSG00000124614.16, ENSG00000270800.3	RPS10 , RPS10-NUDT3	protein_coding, protein_coding	0.981565	2411604	13488	31800	6
ZH38T0009062	TSS	ENSG00000084207.17	GSTP1	protein_coding	0.981544	266665	3751	1263	0
ZH38T0021357	TSS	ENSG00000229637.4	PRAC2	protein_coding	0.981544	1170	0	22	0
ZH38T0042792	TSS	ENSG00000096006.11	CRISP3	protein_coding	0.981527	25026	405	66	0
ZH38T0026642	TSS	ENSG00000084674.14	APOB	protein_coding	0.981518	1965	6	31	0
ZH38T0040721	TSS	ENSG00000155868.8	MED7	protein_coding	0.981515	114158	20	2130	0
ZH38T0010515	TSS	ENSG00000250510.8	GPR162	protein_coding	0.9815	11566	22	196	0
ZH38T0035813	TSS	ENSG00000136603.14	SKIL	protein_coding	0.981496	84550	6	1588	0
ZH38T0035186	TSS	ENSG00000169714.16	CNBP	protein_coding	0.981485	1961862	9065	27909	35
ZH38T0030663	TSS	ENSG00000101306.10	MYLK2	protein_coding	0.981478	11499	0	217	0
ZH38T0005806	TSS	ENSG00000266412.5	NCOA4	protein_coding	0.981447	716535	4445	9075	25
ZH38T0017855	TSS	ENSG00000167965.18	MLST8	protein_coding	0.981421	103640	820	1142	0
ZH38T0040076	TSS	ENSG00000131437.15	KIF3A	protein_coding	0.98141	351392	6232	424	0
ZH38T0041728	TSS	ENSG00000112343.11	TRIM38	protein_coding	0.981405	33989	205	439	0
ZH38T0019192	TSS	ENSG00000141101.13	NOB1	protein_coding	0.981393	67090	645	627	0
ZH38T0025997	TSS	ENSG00000170906.15	NDUFA3	protein_coding	0.981377	1295382	15732	8850	0
ZH38T0004721	TSS	ENSG00000185842.15	DNAH14	protein_coding	0.981354	177264	2168	1200	0
ZH38T0021244	TSS	ENSG00000214401.4	KANSL1-AS1	lncRNA	0.981351	8104	78	76	0
ZH38T0018594	TSS	ENSG00000102882.12	MAPK3	protein_coding	0.981336	13092	211	38	0
ZH38T0011231	TSS	ENSG00000005175.10	RPAP3	protein_coding	0.981332	220158	4053	135	0
ZH38T0050682	TSS	ENSG00000148297.15	MED22	protein_coding	0.981325	85440	1227	399	0
ZH38T0047939	TSS	ENSG00000104435.13	STMN2	protein_coding	0.981315	2836	44	10	0
ZH38T0001990	TSS	ENSG00000117155.16	SSX2IP	protein_coding	0.981278	34488	632	18	8
ZH38T0024319	TSS	ENSG00000130479.11	MAP1S	protein_coding	0.981261	26130	371	128	0
ZH38T0015953	TSS	ENSG00000270550.1	IGHV3-30	IG_V_gene	0.981256	11831	0	223	3
ZH38T0052066	TSS	ENSG00000077274.9	CAPN6	protein_coding	0.981249	9995	96	95	0
ZH38T0020189	TSS	ENSG00000006695.12	COX10	protein_coding	0.981243	178388	1272	2138	0
ZH38T0051293	TSS	ENSG00000165169.11	DYNLT3	protein_coding	0.981237	265302	4107	966	0
ZH38T0026140	TSS	ENSG00000179922.5	ZNF784	protein_coding	0.981233	2928	18	38	0
ZH38T0034359	TSS	ENSG00000163681.15	SLMAP	protein_coding	0.981233	20391	0	390	0
ZH38T0031803	TSS	ENSG00000159259.8	CHAF1B	protein_coding	0.981208	30180	349	228	1
ZH38T0009322	TSS	ENSG00000182704.8, ENSG00000261578.1	TSKU , AP003119.3	protein_coding, lncRNA	0.981204	35812	68	618	0
ZH38T0024657	TSS	ENSG00000266964.5	FXYD1	protein_coding	0.981197	1983	10	28	0
ZH38T0027636	TSS	ENSG00000204843.12	DCTN1	protein_coding	0.98117	229743	3079	1330	0
ZH38T0033241	TSS	ENSG00000284194.2	SCO2	protein_coding	0.981164	23440	0	450	0
ZH38T0033263	TSS	ENSG00000100312.10	ACR	protein_coding	0.98115	4164	34	46	0
ZH38T0030108	TSS	ENSG00000065802.12	ASB1	protein_coding	0.981144	9418	171	10	0
ZH38T0023499	TSS	ENSG00000104953.20	TLE6	protein_coding	0.981143	9990	84	108	0
ZH38T0001276	TSS	ENSG00000171793.16	CTPS1	protein_coding	0.981143	109680	1064	1044	0
ZH38T0030320	TSS	ENSG00000088836.14	SLC4A11	protein_coding	0.98114	9364	44	136	0
ZH38T0014805	TSS	ENSG00000100479.13	POLE2	protein_coding	0.981139	29964	396	180	0
ZH38T0027177	TSS	ENSG00000170802.16	FOXN2	protein_coding	0.981117	72584	548	849	0
ZH38T0036000	TSS	ENSG00000163882.9	POLR2H	protein_coding	0.981083	178617	756	2688	0
ZH38T0024054	TSS	ENSG00000196466.10, ENSG00000268744.1	ZNF799 , AC008758.4	protein_coding, lncRNA	0.98106	23775	180	279	0
ZH38T0040935	TSS	ENSG00000113732.9	ATP6V0E1	protein_coding	0.981052	1430912	12148	15488	0
ZH38T0042292	TSS	ENSG00000231500.7	RPS18	protein_coding	0.981045	965972	4200	14456	8
ZH38T0003923	TSS	ENSG00000135828.11	RNASEL	protein_coding	0.981045	39748	88	680	0
ZH38T0030676	TSS	ENSG00000126003.7	PLAGL2	protein_coding	0.981039	8589	166	0	0
ZH38T0024893	TSS	ENSG00000178982.9	EIF3K	protein_coding	0.981029	1482677	15071	13594	7
ZH38T0001068	TSS	ENSG00000163866.9	SMIM12	protein_coding	0.981017	215193	396	3765	3
ZH38T0043268	TSS	ENSG00000112276.14	BVES	protein_coding	0.981003	7333	37	105	0
ZH38T0032750	TSS	ENSG00000100362.13	PVALB	protein_coding	0.981001	1549	23	7	0
ZH38T0015794	TSS	ENSG00000185215.9	TNFAIP2	protein_coding	0.980998	18689	36	326	0
ZH38T0002382	TSS	ENSG00000134216.19	CHIA	protein_coding	0.980989	1032	20	0	0
ZH38T0041389	TSS	ENSG00000124783.14	SSR1	protein_coding	0.980969	1300747	8225	17010	0
ZH38T0017717	TSS	ENSG00000167930.17	FAM234A	protein_coding	0.980964	125740	2226	214	0
ZH38T0048690	TSS	ENSG00000277494.2	GPIHBP1	protein_coding	0.980952	17664	44	299	0
ZH38T0016295	TSS	ENSG00000140319.10	SRP14	protein_coding	0.980943	3011848	5164	53348	0
ZH38T0024632	TSS	ENSG00000089351.14	GRAMD1A	protein_coding	0.98094	772	4	11	0
ZH38T0012678	TSS	ENSG00000122986.13	HVCN1	protein_coding	0.980926	9257	148	32	0
ZH38T0036355	TSS	ENSG00000168993.15	CPLX1	protein_coding	0.980919	5038	98	0	0
ZH38T0037947	TSS	ENSG00000137463.5	MGARP	protein_coding	0.980907	27743	143	397	0
ZH38T0006318	TSS	ENSG00000133665.13	DYDC2	protein_coding	0.980904	3082	10	50	0
ZH38T0050570	TSS	ENSG00000233901.6	LINC01503	lncRNA	0.9809	2876	36	20	0
ZH38T0007271	TSS	ENSG00000127884.5	ECHS1	protein_coding	0.98087	81271	1030	555	0
ZH38T0016924	TSS	ENSG00000174485.15	DENND4A	protein_coding	0.980797	35038	246	440	0
ZH38T0027886	TSS	ENSG00000239819.2, ENSG00000278857.1	IGKV1D-8 , IGKV1D-12	IG_V_gene, IG_V_gene	0.980769	204	1	3	0
ZH38T0017076	TSS	ENSG00000156642.16	NPTN	protein_coding	0.980747	159138	2614	510	0
ZH38T0046555	TSS	ENSG00000064393.16	HIPK2	protein_coding	0.980743	31983	221	406	1
ZH38T0044100	TSS	ENSG00000092820.18	EZR	protein_coding	0.980735	71883	1385	26	1
ZH38T0010366	TSS	ENSG00000171792.11	RHNO1	protein_coding	0.980733	136215	744	1932	0
ZH38T0032383	TSS	ENSG00000128218.8	VPREB3	protein_coding	0.980725	5088	22	78	0
ZH38T0018179	TSS	ENSG00000166780.11	BMERB1	protein_coding	0.980694	4013	43	36	0
ZH38T0018859	TSS	ENSG00000198848.12	CES1	protein_coding	0.980679	91058	1370	424	0
ZH38T0032158	TSS	ENSG00000131100.13	ATP6V1E1	protein_coding	0.980668	457611	4836	4185	0
ZH38T0024187	TSS	ENSG00000072062.13	PRKACA	protein_coding	0.980666	3652	34	38	0
ZH38T0007398	TSS	ENSG00000214063.11	TSPAN4	protein_coding	0.980643	181368	3352	220	8
ZH38T0018601	TSS	ENSG00000169217.9	CD2BP2	protein_coding	0.980637	70143	135	1250	0
ZH38T0039729	TSS	ENSG00000113441.16	LNPEP	protein_coding	0.980626	38671	100	664	0
ZH38T0050835	TSS	ENSG00000197191.5	CYSRT1	protein_coding	0.98062	10474	28	179	0
ZH38T0007100	TSS	ENSG00000148908.15	RGS10	protein_coding	0.980609	2124	30	12	0
ZH38T0031603	TSS	ENSG00000154723.12	ATP5PF	protein_coding	0.980602	1016676	5680	14432	0
ZH38T0046582	TSS	ENSG00000090263.16	MRPS33	protein_coding	0.980594	259526	3306	1830	0
ZH38T0002790	TSS	ENSG00000159164.10	SV2A	protein_coding	0.980588	21014	0	416	0
ZH38T0050775	TSS	ENSG00000172889.16	EGFL7	protein_coding	0.980568	13019	258	0	0
ZH38T0025295	TSS	ENSG00000187244.11	BCAM	protein_coding	0.980566	40364	484	316	0
ZH38T0037461	TSS	ENSG00000145335.15	SNCA	protein_coding	0.980558	5346	60	46	0
ZH38T0023810	TSS	ENSG00000104976.12	SNAPC2	protein_coding	0.980547	6351	0	126	0
ZH38T0000354	TSS	ENSG00000116670.15	MAD2L2	protein_coding	0.980542	100582	1246	750	0
ZH38T0007534	TSS	ENSG00000130598.16	TNNI2	protein_coding	0.980532	2065	0	41	0
ZH38T0031699	TSS	ENSG00000242220.7	TCP10L	protein_coding	0.980527	7956	96	62	0
ZH38T0031050	TSS	ENSG00000175063.17	UBE2C	protein_coding	0.980474	501630	1926	8064	0
ZH38T0021535	TSS	ENSG00000243678.11	NME2	protein_coding	0.980468	1249558	6513	18380	0
ZH38T0050488	TSS	ENSG00000148337.21	CIZ1	protein_coding	0.980456	9030	78	102	0
ZH38T0029033	TSS	ENSG00000170144.20	HNRNPA3	protein_coding	0.980452	501204	6345	3642	6
ZH38T0019419	TSS	ENSG00000140943.17	MBTPS1	protein_coding	0.980449	89415	601	1182	0
ZH38T0052473	TSS	ENSG00000184343.11	SRPK3	protein_coding	0.980373	7992	28	132	0
ZH38T0033249	TSS	ENSG00000217442.4	SYCE3	protein_coding	0.980366	4394	38	50	0
ZH38T0052277	TSS	ENSG00000165704.15	HPRT1	protein_coding	0.980361	27705	362	193	0
ZH38T0043958	TSS	ENSG00000164520.11	RAET1E	protein_coding	0.98036	599	8	4	0
ZH38T0032221	TSS	ENSG00000093010.13	COMT	protein_coding	0.980357	79852	1236	364	0
ZH38T0052468	TSS	ENSG00000185825.16	BCAP31	protein_coding	0.980337	142739	1444	1417	2
ZH38T0027859	TSS	ENSG00000211592.8, ENSG00000241351.3	IGKC , IGKV3-11	IG_C_gene, IG_V_gene	0.980315	18625	61	313	0
ZH38T0031093	TSS	ENSG00000062598.18, ENSG00000215452.5, ENSG00000283757.1	ELMO2 , ZNF663P , AL031686.1	protein_coding, transcribed_unitary_pseudogene, lncRNA	0.980306	448	3	6	0
ZH38T0011325	TSS	ENSG00000167553.15	TUBA1C	protein_coding	0.980292	97892	388	1580	0
ZH38T0003799	TSS	ENSG00000185278.15	ZBTB37	protein_coding	0.980276	20476	16	396	0
ZH38T0023355	TSS	ENSG00000185198.11	PRSS57	protein_coding	0.980254	1390	8	20	0
ZH38T0006810	TSS	ENSG00000138175.9	ARL3	protein_coding	0.980231	268744	3815	1602	3
ZH38T0003034	TSS	ENSG00000184330.12	S100A7A	protein_coding	0.980222	793	4	12	0
ZH38T0047715	TSS	ENSG00000137575.12	SDCBP	protein_coding	0.980216	496440	7860	2160	0
ZH38T0002452	TSS	ENSG00000116774.12	OLFML3	protein_coding	0.980211	152910	612	2475	0
ZH38T0016707	TSS	ENSG00000137871.20	ZNF280D	protein_coding	0.980201	149318	2464	550	2
ZH38T0015778	TSS	ENSG00000100865.15	CINP	protein_coding	0.980196	110970	1346	896	0
ZH38T0030513	TSS	ENSG00000232388.4, ENSG00000284776.1	SMIM26 , AL121900.2	protein_coding, protein_coding	0.980183	720372	676	13888	0
ZH38T0010875	TSS	ENSG00000008394.13	MGST1	protein_coding	0.980163	807564	9408	6852	84
ZH38T0002331	TSS	ENSG00000156097.12	GPR61	protein_coding	0.980163	5781	9	108	0
ZH38T0027146	TSS	ENSG00000239605.11, ENSG00000273269.3	STPG4 , AC073283.3	protein_coding, protein_coding	0.980159	988	14	6	0
ZH38T0042760	TSS	ENSG00000146070.16	PLA2G7	protein_coding	0.980159	494	6	4	0
ZH38T0011414	TSS	ENSG00000135503.13	ACVR1B	protein_coding	0.980132	58212	996	184	0
ZH38T0016442	TSS	ENSG00000166963.13	MAP1A	protein_coding	0.9801	19947	91	314	0
ZH38T0022966	TSS	ENSG00000152234.16	ATP5F1A	protein_coding	0.980097	665961	5595	7929	0
ZH38T0029926	TSS	ENSG00000115053.16	NCL	protein_coding	0.980093	246953	489	4527	0
ZH38T0047262	TSS	ENSG00000134028.14	ADAMDEC1	protein_coding	0.980092	6597	28	106	0
ZH38T0032229	TSS	ENSG00000128191.16	DGCR8	protein_coding	0.98006	22118	222	224	4
ZH38T0014654	TSS	ENSG00000165410.14	CFL2	protein_coding	0.980048	7810	0	159	0
ZH38T0020632	TSS	ENSG00000108691.9	CCL2	protein_coding	0.980046	213750	4	4348	0
ZH38T0023705	TSS	ENSG00000130545.16	CRB3	protein_coding	0.980044	21510	284	154	0
ZH38T0006516	TSS	ENSG00000138180.15	CEP55	protein_coding	0.980043	20085	52	357	0
ZH38T0041267	TSS	ENSG00000230438.7	SERPINB9P1	lncRNA	0.980022	883	17	1	0
ZH38T0031034	TSS	ENSG00000244274.7	DBNDD2	protein_coding	0.980018	2158	2	42	0
ZH38T0007667	TSS	ENSG00000258659.6	TRIM34	protein_coding	0.980003	15633	242	77	0
ZH38T0038488	TSS	ENSG00000250754.6	LINC02436	lncRNA	0.98	2450	40	10	0
ZH38T0004155	TSS	ENSG00000163395.16	IGFN1	protein_coding	0.979981	4210	72	14	0
ZH38T0032973	TSS	ENSG00000100399.16	CHADL	protein_coding	0.979973	734	7	8	0
ZH38T0023776	TSS	ENSG00000090674.16	MCOLN1	protein_coding	0.979971	9492	148	46	0
ZH38T0032018	TSS	ENSG00000183255.12	PTTG1IP	protein_coding	0.979966	395338	2560	5522	0
ZH38T0050803	TSS	ENSG00000107223.13	EDF1	protein_coding	0.979966	1727199	2904	32403	3
ZH38T0029363	TSS	ENSG00000119013.9	NDUFB3	protein_coding	0.979952	244258	585	4412	0
ZH38T0027873	TSS	ENSG00000211592.8, ENSG00000211594.2, ENSG00000211595.2, ENSG00000244116.3, ENSG00000253435.1	IGKC , IGKJ4 , IGKJ3 , IGKV2-28 , IGKV2-4	IG_C_gene, IG_J_gene, IG_J_gene, IG_V_gene, IG_V_pseudogene	0.979938	6301	34	89	6
ZH38T0005267	TSS	ENSG00000165629.20	ATP5F1C	protein_coding	0.979932	679738	7846	6074	0
ZH38T0014908	TSS	ENSG00000100526.20	CDKN3	protein_coding	0.97991	837543	3997	13174	0
ZH38T0044832	TSS	ENSG00000106125.14	MINDY4	protein_coding	0.979903	10678	41	178	0
ZH38T0051348	TSS	ENSG00000171659.15	GPR34	protein_coding	0.979889	92964	376	1532	0
ZH38T0051038	TSS	ENSG00000006757.12	PNPLA4	protein_coding	0.979884	22212	246	210	0
ZH38T0046681	TSS	ENSG00000055130.17	CUL1	protein_coding	0.979875	627204	9948	2928	6
ZH38T0001608	TSS	ENSG00000081870.11	HSPB11	protein_coding	0.979873	296294	3984	2102	0
ZH38T0021845	TSS	ENSG00000168646.13	AXIN2	protein_coding	0.979866	10804	6	216	0
ZH38T0008202	TSS	ENSG00000166349.9	RAG1	protein_coding	0.979866	438	0	9	0
ZH38T0036778	TSS	ENSG00000163682.16	RPL9	protein_coding	0.979859	1089177	7810	14548	30
ZH38T0046907	TSS	ENSG00000182372.9, ENSG00000283239.1	CLN8 , AC019257.8	protein_coding, protein_coding	0.979842	147768	1440	1600	0
ZH38T0007379	TSS	ENSG00000177600.9	RPLP2	protein_coding	0.979834	607924	446	12066	0
ZH38T0023358	TSS	ENSG00000099812.9	MISP	protein_coding	0.979831	10542	0	217	0
ZH38T0045019	TSS	ENSG00000235314.1	LINC00957	lncRNA	0.979815	2864	59	0	0
ZH38T0021853	TSS	ENSG00000091583.11	APOH	protein_coding	0.97979	28701	537	55	0
ZH38T0041056	TSS	ENSG00000113758.13	DBN1	protein_coding	0.979787	142654	2222	721	0
ZH38T0007210	TSS	ENSG00000188690.15	UROS	protein_coding	0.979767	122172	1461	1062	0
ZH38T0021651	TSS	ENSG00000182628.13	SKA2	protein_coding	0.979724	881364	2394	15840	6
ZH38T0050690	TSS	ENSG00000148248.14	SURF4	protein_coding	0.979716	99886	1374	694	0
ZH38T0002526	TSS	ENSG00000116824.5	CD2	protein_coding	0.979716	4830	18	82	0
ZH38T0000707	TSS	ENSG00000011009.11	LYPLA2	protein_coding	0.979709	242960	3792	1240	0
ZH38T0028885	TSS	ENSG00000213160.10	KLHL23	protein_coding	0.979708	27520	143	427	0
ZH38T0038900	TSS	ENSG00000152611.12	CAPSL	protein_coding	0.9797	16650	228	117	0
ZH38T0030331	TSS	ENSG00000149451.17	ADAM33	protein_coding	0.979696	76575	1323	264	0
ZH38T0029872	TSS	ENSG00000153827.13	TRIP12	protein_coding	0.97969	208388	2872	1444	4
ZH38T0012356	TSS	ENSG00000057704.13	TMCC3	protein_coding	0.979688	21318	28	414	0
ZH38T0037309	TSS	ENSG00000138669.9	PRKG2	protein_coding	0.979677	4242	8	80	0
ZH38T0000870	TSS	ENSG00000126709.15	IFI6	protein_coding	0.979676	69123	1119	315	0
ZH38T0016907	TSS	ENSG00000138615.6	CILP	protein_coding	0.979631	32896	504	180	0
ZH38T0047545	TSS	ENSG00000147533.16	GOLGA7	protein_coding	0.979611	180507	644	3113	0
ZH38T0043069	TSS	ENSG00000112742.10	TTK	protein_coding	0.979596	16035	262	72	0
ZH38T0017517	TSS	ENSG00000198901.14	PRC1	protein_coding	0.979594	118186	1534	928	0
ZH38T0051881	TSS	ENSG00000000005.6	TNMD	protein_coding	0.979589	5999	24	101	0
ZH38T0015858	TSS	ENSG00000170779.10	CDCA4	protein_coding	0.979583	19479	32	374	0
ZH38T0018890	TSS	ENSG00000125144.13	MT1G	protein_coding	0.979573	61862	8	1282	0
ZH38T0043831	TSS	ENSG00000164440.15	TXLNB	protein_coding	0.979569	21048	279	160	0
ZH38T0051010	TSS	ENSG00000002586.20	CD99	protein_coding	0.979551	1791395	21924	15473	0
ZH38T0025038	TSS	ENSG00000197019.5	SERTAD1	protein_coding	0.979549	9915	9	198	0
ZH38T0025362	TSS	ENSG00000125744.12	RTN2	protein_coding	0.979547	11638	117	126	0
ZH38T0009693	TSS	ENSG00000149289.11	ZC3H12C	protein_coding	0.979442	1334	9	19	0
ZH38T0004659	TSS	ENSG00000154305.18	MIA3	protein_coding	0.979438	96698	1906	123	1
ZH38T0001938	TSS	ENSG00000137965.11	IFI44	protein_coding	0.979405	14029	186	109	0
ZH38T0031035	TSS	ENSG00000244274.7	DBNDD2	protein_coding	0.979387	22664	56	421	0
ZH38T0008994	TSS	ENSG00000254986.7	DPP3	protein_coding	0.979387	35254	548	192	2
ZH38T0016630	TSS	ENSG00000069956.12	MAPK6	protein_coding	0.979384	61568	520	776	0
ZH38T0002999	TSS	ENSG00000163207.7	IVL	protein_coding	0.979383	6603	3	136	0
ZH38T0010211	TSS	ENSG00000084234.17	APLP2	protein_coding	0.979361	981476	1860	18812	12
ZH38T0007890	TSS	ENSG00000175868.14	CALCB	protein_coding	0.979353	2846	14	46	0
ZH38T0050181	TSS	ENSG00000119471.15	HSDL2	protein_coding	0.979351	269304	1572	4106	0
ZH38T0027863	TSS	ENSG00000211592.8, ENSG00000240864.3	IGKC , IGKV1-16	IG_C_gene, IG_V_gene	0.979336	6635	13	127	0
ZH38T0006804	TSS	ENSG00000138107.13	ACTR1A	protein_coding	0.979329	201448	2252	2000	0
ZH38T0029766	TSS	ENSG00000072195.15	SPEG	protein_coding	0.97931	12685	59	209	0
ZH38T0003280	TSS	ENSG00000116586.11	LAMTOR2	protein_coding	0.979303	446574	747	8691	0
ZH38T0047135	TSS	ENSG00000104611.12	SH2D4A	protein_coding	0.9793	10124	58	156	0
ZH38T0006790	TSS	ENSG00000059915.17	PSD	protein_coding	0.97929	2648	0	56	0
ZH38T0016537	TSS	ENSG00000137767.14	SQOR	protein_coding	0.979284	70058	853	629	0
ZH38T0050551	TSS	ENSG00000167130.18	DOLPP1	protein_coding	0.979284	19476	360	52	0
ZH38T0000974	TSS	ENSG00000184007.21	PTP4A2	protein_coding	0.97928	7042	19	130	0
ZH38T0024009	TSS	ENSG00000130176.8	CNN1	protein_coding	0.979273	429224	3564	5521	0
ZH38T0012134	TSS	ENSG00000187109.14	NAP1L1	protein_coding	0.97927	2877340	31510	29330	70
ZH38T0020203	TSS	ENSG00000221926.12	TRIM16	protein_coding	0.979266	13602	36	252	0
ZH38T0041324	TSS	ENSG00000198721.12	ECI2	protein_coding	0.979253	373113	3852	4053	0
ZH38T0034238	TSS	ENSG00000162244.11	RPL29	protein_coding	0.979248	2204437	125	46580	10
ZH38T0016444	TSS	ENSG00000168781.22	PPIP5K1	protein_coding	0.97924	93964	1992	0	0
ZH38T0039620	TSS	ENSG00000153140.8	CETN3	protein_coding	0.979199	394720	3495	4890	0
ZH38T0051741	TSS	ENSG00000102309.14	PIN4	protein_coding	0.979189	799365	4018	12971	0
ZH38T0017857	TSS	ENSG00000182685.7	BRICD5	protein_coding	0.979188	1929	0	41	0
ZH38T0013847	TSS	ENSG00000188243.12	COMMD6	protein_coding	0.979185	620397	2199	10989	0
ZH38T0023397	TSS	ENSG00000064932.16	SBNO2	protein_coding	0.979177	26004	200	353	0
ZH38T0039437	TSS	ENSG00000122012.14	SV2C	protein_coding	0.979152	10896	28	204	0
ZH38T0007993	TSS	ENSG00000151117.9	TMEM86A	protein_coding	0.979136	4693	57	43	0
ZH38T0008006	TSS	ENSG00000129173.13	E2F8	protein_coding	0.979136	1314	16	12	0
ZH38T0021980	TSS	ENSG00000264985.4	AC124804.1	lncRNA	0.97913	563	0	12	0
ZH38T0045185	TSS	ENSG00000146731.11	CCT6A	protein_coding	0.979119	184280	534	3396	0
ZH38T0033125	TSS	ENSG00000077935.17	SMC1B	protein_coding	0.979109	4968	10	96	0
ZH38T0015601	TSS	ENSG00000140093.10	SERPINA10	protein_coding	0.979093	14377	101	206	0
ZH38T0040155	TSS	ENSG00000113648.16	H2AFY	protein_coding	0.979059	74712	1457	141	0
ZH38T0040120	TSS	ENSG00000113558.18	SKP1	protein_coding	0.979042	987192	2732	18400	0
ZH38T0032689	TSS	ENSG00000198125.13	MB	protein_coding	0.979038	7426	133	26	0
ZH38T0041537	TSS	ENSG00000180537.13	RNF182	protein_coding	0.979022	6767	145	0	0
ZH38T0025500	TSS	ENSG00000178980.15	SELENOW	protein_coding	0.979017	724516	2877	12651	0
ZH38T0035145	TSS	ENSG00000058262.10	SEC61A1	protein_coding	0.979016	231452	781	4180	0
ZH38T0023154	TSS	ENSG00000166562.9	SEC11C	protein_coding	0.979013	831267	5034	12786	0
ZH38T0024331	TSS	ENSG00000105640.13	RPL18A	protein_coding	0.978986	976644	4137	16821	6
ZH38T0023470	TSS	ENSG00000167476.10	JSRP1	protein_coding	0.978973	3585	58	19	0
ZH38T0034654	TSS	ENSG00000170854.18	RIOX2	protein_coding	0.978966	99784	1602	542	0
ZH38T0021490	TSS	ENSG00000108846.16	ABCC3	protein_coding	0.978959	884	19	0	0
ZH38T0042311	TSS	ENSG00000237649.8	KIFC1	protein_coding	0.978941	43743	300	641	0
ZH38T0025314	TSS	ENSG00000104853.16	CLPTM1	protein_coding	0.97893	125865	1660	1049	0
ZH38T0040287	TSS	ENSG00000120306.11	CYSTM1	protein_coding	0.978927	436586	6748	2650	0
ZH38T0023364	TSS	ENSG00000011304.20	PTBP1	protein_coding	0.978924	130052	2568	220	12
ZH38T0022028	TSS	ENSG00000188612.12	SUMO2	protein_coding	0.978921	19691	47	377	0
ZH38T0018834	TSS	ENSG00000103494.14	RPGRIP1L	protein_coding	0.978919	260502	4308	1302	0
ZH38T0009564	TSS	ENSG00000077458.13	FAM76B	protein_coding	0.978909	87534	601	1284	1
ZH38T0011033	TSS	ENSG00000152944.9	MED21	protein_coding	0.978899	275662	744	5192	6
ZH38T0051923	TSS	ENSG00000286794.1	Z70719.1	lncRNA	0.978873	556	0	12	0
ZH38T0028635	TSS	ENSG00000184898.7	RBM43	protein_coding	0.978865	8383	74	107	0
ZH38T0008775	TSS	ENSG00000173113.6	TRMT112	protein_coding	0.978861	1130952	60	24356	8
ZH38T0017366	TSS	ENSG00000140612.14	SEC11A	protein_coding	0.978857	421680	4188	4916	4
ZH38T0045911	TSS	ENSG00000106400.12	ZNHIT1	protein_coding	0.978852	75676	674	961	0
ZH38T0023921	TSS	ENSG00000079999.14	KEAP1	protein_coding	0.978847	4905	8	98	0
ZH38T0005103	TSS	ENSG00000175137.11	SH3BP5L	protein_coding	0.978836	15031	150	175	0
ZH38T0032916	TSS	ENSG00000187051.9	RPS19BP1	protein_coding	0.978802	104910	982	1289	1
ZH38T0032050	TSS	ENSG00000182871.16	COL18A1	protein_coding	0.978796	1154	14	11	0
ZH38T0044649	TSS	ENSG00000196683.10	TOMM7	protein_coding	0.978782	561027	729	11430	3
ZH38T0034028	TSS	ENSG00000047849.21	MAP4	protein_coding	0.978768	13645	150	146	0
ZH38T0007647	TSS	ENSG00000132109.10	TRIM21	protein_coding	0.978749	23903	280	239	0
ZH38T0019796	TSS	ENSG00000142507.10	PSMB6	protein_coding	0.978742	388578	1148	7290	2
ZH38T0023824	TSS	ENSG00000167774.2, ENSG00000267855.5	AC010323.1 , NDUFA7	protein_coding, protein_coding	0.978741	192900	2278	1912	0
ZH38T0002108	TSS	ENSG00000122406.14	RPL5	protein_coding	0.978738	935382	5758	14546	16
ZH38T0043993	TSS	ENSG00000146476.11	ARMT1	protein_coding	0.978736	61218	546	784	0
ZH38T0028192	TSS	ENSG00000186522.15	2021-09-10	protein_coding	0.97871	305796	5348	1296	8
ZH38T0026315	TSS	ENSG00000143727.16	ACP1	protein_coding	0.978709	1120935	6125	18260	0
ZH38T0028250	TSS	ENSG00000125637.15	PSD4	protein_coding	0.978702	11948	8	252	0
ZH38T0023878	TSS	ENSG00000127445.13	PIN1	protein_coding	0.978695	350595	7047	585	0
ZH38T0022603	TSS	ENSG00000101680.15	LAMA1	protein_coding	0.978688	18369	287	112	1
ZH38T0011496	TSS	ENSG00000063046.17	EIF4B	protein_coding	0.978663	379592	3632	4644	0
ZH38T0028646	TSS	ENSG00000183091.19	NEB	protein_coding	0.978651	333725	2395	4885	0
ZH38T0007817	TSS	ENSG00000110321.17	EIF4G2	protein_coding	0.978641	13929	52	252	0
ZH38T0027912	TSS	ENSG00000144029.12	MRPS5	protein_coding	0.97864	251212	2434	3049	0
ZH38T0016621	TSS	ENSG00000128872.10	TMOD2	protein_coding	0.978624	85428	1782	84	0
ZH38T0041991	TSS	ENSG00000204568.12	MRPS18B	protein_coding	0.978623	105657	735	1572	1
ZH38T0004937	TSS	ENSG00000143669.13	LYST	protein_coding	0.978615	178656	3516	386	2
ZH38T0008906	TSS	ENSG00000142186.17	SCYL1	protein_coding	0.978595	421745	85	9140	0
ZH38T0042309	TSS	ENSG00000204209.13	DAXX	protein_coding	0.978592	212468	724	3924	0
ZH38T0047324	TSS	ENSG00000120915.13	EPHX2	protein_coding	0.978563	241568	2468	2824	0
ZH38T0017078	TSS	ENSG00000103855.18	CD276	protein_coding	0.978559	14696	318	4	0
ZH38T0004859	TSS	ENSG00000135744.8	AGT	protein_coding	0.978559	32495	18	694	0
ZH38T0045917	TSS	ENSG00000214253.8	FIS1	protein_coding	0.978548	278712	1602	4508	0
ZH38T0005562	TSS	ENSG00000169126.15	ARMC4	protein_coding	0.978541	912	16	4	0
ZH38T0011808	TSS	ENSG00000196531.10	NACA	protein_coding	0.978535	9082386	24618	174444	168
ZH38T0029769	TSS	ENSG00000286095.1	SPEGNB	protein_coding	0.978531	866	2	17	0
ZH38T0034929	TSS	ENSG00000114638.8	UPK1B	protein_coding	0.978524	22144	126	360	0
ZH38T0008395	TSS	ENSG00000156599.11	ZDHHC5	protein_coding	0.978521	24692	29	513	0
ZH38T0051090	TSS	ENSG00000187268.12	FAM9C	protein_coding	0.978516	3006	60	6	0
ZH38T0030154	TSS	ENSG00000115687.13	PASK	protein_coding	0.978511	17622	243	144	0
ZH38T0012339	TSS	ENSG00000120833.14	SOCS2	protein_coding	0.978504	5417	0	119	0
ZH38T0017982	TSS	ENSG00000262185.3	AC005736.1	lncRNA	0.978495	910	3	17	0
ZH38T0028067	TSS	ENSG00000071082.11	RPL31	protein_coding	0.978492	2392384	17706	34880	0
ZH38T0023417	TSS	ENSG00000228300.14	C19orf24	protein_coding	0.978467	16858	19	352	0
ZH38T0036312	TSS	ENSG00000182899.17	RPL35A	protein_coding	0.97845	858594	12222	6688	0
ZH38T0049720	TSS	ENSG00000165113.13	GKAP1	protein_coding	0.978448	2270	35	15	0
ZH38T0050037	TSS	ENSG00000136897.8	MRPL50	protein_coding	0.978442	186493	47	4062	0
ZH38T0028859	TSS	ENSG00000152253.9	SPC25	protein_coding	0.978431	16331	282	78	0
ZH38T0024438	TSS	ENSG00000286080.1	AC011477.8	lncRNA	0.978417	136	1	2	0
ZH38T0021090	TSS	ENSG00000131469.14	RPL27	protein_coding	0.978408	385068	1030	7468	0
ZH38T0026000	TSS	ENSG00000105619.13	TFPT	protein_coding	0.978408	9425	105	103	0
ZH38T0050459	TSS	ENSG00000106992.19	AK1	protein_coding	0.978388	1675	1	36	0
ZH38T0023809	TSS	ENSG00000104976.12	SNAPC2	protein_coding	0.978387	4391	5	92	0
ZH38T0049860	TSS	ENSG00000106823.12	ECM2	protein_coding	0.978387	25395	297	264	0
ZH38T0045864	TSS	ENSG00000087085.15	ACHE	protein_coding	0.978386	679	0	15	0
ZH38T0026292	TSS	ENSG00000130724.8	CHMP2A	protein_coding	0.978384	397218	1998	6778	0
ZH38T0035918	TSS	ENSG00000284862.3	CCDC39	protein_coding	0.978368	11940	68	196	0
ZH38T0008514	TSS	ENSG00000110107.9	PRPF19	protein_coding	0.97836	57464	682	589	0
ZH38T0021064	TSS	ENSG00000184451.5	CCR10	protein_coding	0.978355	226	0	5	0
ZH38T0001463	TSS	ENSG00000085998.14	POMGNT1	protein_coding	0.978351	34165	329	427	0
ZH38T0016760	TSS	ENSG00000157456.8	CCNB2	protein_coding	0.978346	266340	2961	2934	0
ZH38T0007399	TSS	ENSG00000214063.11	TSPAN4	protein_coding	0.978336	56631	1170	84	0
ZH38T0020260	TSS	ENSG00000141030.13	COPS3	protein_coding	0.978336	85758	1425	474	0
ZH38T0029768	TSS	ENSG00000072195.15	SPEG	protein_coding	0.978308	451	0	10	0
ZH38T0038613	TSS	ENSG00000028310.18	BRD9	protein_coding	0.978305	27237	346	258	0
ZH38T0003462	TSS	ENSG00000162734.12	PEA15	protein_coding	0.978291	237537	1482	3786	3
ZH38T0042125	TSS	ENSG00000204444.11	APOM	protein_coding	0.978265	9857	47	172	0
ZH38T0023392	TSS	ENSG00000099817.12	POLR2E	protein_coding	0.978264	478160	9176	1448	0
ZH38T0019286	TSS	ENSG00000103035.11	PSMD7	protein_coding	0.978228	789492	7230	10341	0
ZH38T0033999	TSS	ENSG00000088727.12	KIF9	protein_coding	0.97822	44959	124	877	0
ZH38T0050057	TSS	ENSG00000136783.10	NIPSNAP3A	protein_coding	0.978218	93593	1203	881	0
ZH38T0040934	TSS	ENSG00000037241.7	RPL26L1	protein_coding	0.978188	281182	1684	4586	0
ZH38T0017058	TSS	ENSG00000067225.18	PKM	protein_coding	0.978169	963372	6684	14802	15
ZH38T0009186	TSS	ENSG00000110200.8	ANAPC15	protein_coding	0.978158	906768	7800	12448	0
ZH38T0007928	TSS	ENSG00000110700.7	RPS13	protein_coding	0.978148	862042	12728	6530	0
ZH38T0023394	TSS	ENSG00000167468.16	GPX4	protein_coding	0.978131	996447	21945	333	0
ZH38T0026375	TSS	ENSG00000118004.17	COLEC11	protein_coding	0.978108	33688	624	130	0
ZH38T0004175	TSS	ENSG00000159173.19	TNNI1	protein_coding	0.97807	1115	13	12	0
ZH38T0016191	TSS	ENSG00000184507.15	NUTM1	protein_coding	0.97807	669	0	15	0
ZH38T0018770	TSS	ENSG00000155330.10	C16orf87	protein_coding	0.97807	149318	2822	526	0
ZH38T0018452	TSS	ENSG00000205609.12	EIF3CL	protein_coding	0.97806	1694	6	32	0
ZH38T0036481	TSS	ENSG00000109501.13	WFS1	protein_coding	0.978051	55522	712	534	0
ZH38T0050689	TSS	ENSG00000148291.10	SURF2	protein_coding	0.978042	48907	282	816	0
ZH38T0032294	TSS	ENSG00000100034.14	PPM1F	protein_coding	0.977989	164750	2768	940	0
ZH38T0032496	TSS	ENSG00000182944.17	EWSR1	protein_coding	0.977986	2505330	52930	3460	5
ZH38T0023366	TSS	ENSG00000129951.18	PLPPR3	protein_coding	0.977948	16320	206	162	0
ZH38T0034924	TSS	ENSG00000239877.3	IGSF11-AS1	lncRNA	0.977941	665	4	11	0
ZH38T0010959	TSS	ENSG00000069431.11	ABCC9	protein_coding	0.977938	17997	200	206	0
ZH38T0052149	TSS	ENSG00000077721.16	UBE2A	protein_coding	0.977932	1551	20	15	0
ZH38T0008372	TSS	ENSG00000134802.17	SLC43A3	protein_coding	0.977926	112395	896	1641	0
ZH38T0030756	TSS	ENSG00000242372.8	EIF6	protein_coding	0.977911	175097	1026	2929	0
ZH38T0023597	TSS	ENSG00000105248.16	YJU2	protein_coding	0.97789	11765	167	99	0
ZH38T0008642	TSS	ENSG00000149499.11	EML3	protein_coding	0.977888	4555	47	56	0
ZH38T0013732	TSS	ENSG00000136108.15	CKAP2	protein_coding	0.977881	2520	9	48	0
ZH38T0037190	TSS	ENSG00000138757.14	G3BP2	protein_coding	0.97786	16342	148	222	0
ZH38T0037003	TSS	ENSG00000084093.17	REST	protein_coding	0.977834	5823	2	130	0
ZH38T0036997	TSS	ENSG00000171476.22	HOPX	protein_coding	0.977809	62130	5	1405	0
ZH38T0018832	TSS	ENSG00000166971.17	AKTIP	protein_coding	0.977804	142599	2127	1110	0
ZH38T0034333	TSS	ENSG00000187672.13	ERC2	protein_coding	0.977787	9860	18	206	0
ZH38T0052406	TSS	ENSG00000185247.15	MAGEA11	protein_coding	0.977778	660	14	1	0
ZH38T0049426	TSS	ENSG00000137124.8	ALDH1B1	protein_coding	0.977773	50501	237	911	0
ZH38T0002791	TSS	ENSG00000143368.10	SF3B4	protein_coding	0.977771	43503	25	964	0
ZH38T0003419	TSS	ENSG00000213088.12	ACKR1	protein_coding	0.977771	19970	18	436	0
ZH38T0022887	TSS	ENSG00000172466.16	ZNF24	protein_coding	0.977771	68530	292	1266	0
ZH38T0049857	TSS	ENSG00000106809.11	OGN	protein_coding	0.977745	55444	102	1160	0
ZH38T0026441	TSS	ENSG00000134308.14	YWHAQ	protein_coding	0.977744	137902	2570	569	0
ZH38T0045034	TSS	ENSG00000106628.10	POLD2	protein_coding	0.977739	147664	1272	2090	0
ZH38T0028347	TSS	ENSG00000155438.12	NIFK	protein_coding	0.977705	267816	838	5269	0
ZH38T0041608	TSS	ENSG00000124795.17	DEK	protein_coding	0.9777	369370	2580	5845	0
ZH38T0024001	TSS	ENSG00000130175.9	PRKCSH	protein_coding	0.977689	56485	853	436	0
ZH38T0022629	TSS	ENSG00000017797.13	RALBP1	protein_coding	0.977682	22035	152	351	0
ZH38T0010298	TSS	ENSG00000171840.12	NINJ2	protein_coding	0.977679	16294	88	284	0
ZH38T0025418	TSS	ENSG00000160014.17	CALM3	protein_coding	0.977666	1013836	10416	12744	0
ZH38T0004841	TSS	ENSG00000143632.14	ACTA1	protein_coding	0.97766	194572	240	4202	4
ZH38T0035077	TSS	ENSG00000173702.7	MUC13	protein_coding	0.977655	3369	9	68	0
ZH38T0033444	TSS	ENSG00000144713.12	RPL32	protein_coding	0.977645	4556376	14155	89879	155
ZH38T0027864	TSS	ENSG00000211592.8, ENSG00000240382.3	IGKC , IGKV1-17	IG_C_gene, IG_V_gene	0.977636	4765	15	94	0
ZH38T0024503	TSS	ENSG00000269332.5	GOLGA2P9	transcribed_unprocessed_pseudogene	0.9776	1222	16	12	0
ZH38T0051510	TSS	ENSG00000147082.17	CCNB3	protein_coding	0.977575	1395	8	24	0
ZH38T0051598	TSS	ENSG00000234068.6	PAGE2	protein_coding	0.97757	2092	36	12	0
ZH38T0023960	TSS	ENSG00000130733.10	YIPF2	protein_coding	0.977542	114000	579	2031	9
ZH38T0017102	TSS	ENSG00000167178.16	ISLR2	protein_coding	0.977528	5829	3	131	0
ZH38T0017278	TSS	ENSG00000086666.19	ZFAND6	protein_coding	0.977519	486770	8910	2280	5
ZH38T0022983	TSS	ENSG00000134049.6, ENSG00000267228.7	IER3IP1 , AC012254.2	protein_coding, protein_coding	0.977512	608064	309	13680	0
ZH38T0007014	TSS	ENSG00000095627.9	TDRD1	protein_coding	0.977511	6520	56	94	0
ZH38T0050362	TSS	ENSG00000165209.18	STRBP	protein_coding	0.977481	6598	56	96	0
ZH38T0045157	TSS	ENSG00000132432.14	SEC61G	protein_coding	0.977452	512268	11211	606	0
ZH38T0011409	TSS	ENSG00000196876.16	SCN8A	protein_coding	0.977424	5888	88	48	0
ZH38T0032279	TSS	ENSG00000099960.13	SLC7A4	protein_coding	0.977405	3028	4	66	0
ZH38T0011395	TSS	ENSG00000170545.17	SMAGP	protein_coding	0.977397	5016	64	52	0
ZH38T0040794	TSS	ENSG00000164611.13	PTTG1	protein_coding	0.977378	368226	804	7719	0
ZH38T0009030	TSS	ENSG00000172830.13	SSH3	protein_coding	0.97736	74510	261	1465	0
ZH38T0013046	TSS	ENSG00000150991.15	UBC	protein_coding	0.977344	140632	84	3176	0
ZH38T0024301	TSS	ENSG00000130311.11	DDA1	protein_coding	0.977313	50229	171	995	0
ZH38T0017150	TSS	ENSG00000167173.19	C15orf39	protein_coding	0.9773	11280	1	261	0
ZH38T0006336	TSS	ENSG00000165678.21	GHITM	protein_coding	0.977281	285668	1606	5035	0
ZH38T0013024	TSS	ENSG00000196498.13	NCOR2	protein_coding	0.977275	16514	136	248	0
ZH38T0019843	TSS	ENSG00000180787.6	ZFP3	protein_coding	0.977273	37196	3	862	0
ZH38T0035518	TSS	ENSG00000070087.14	PFN2	protein_coding	0.977269	598885	1463	12467	0
ZH38T0024713	TSS	ENSG00000105675.8	ATP4A	protein_coding	0.977265	6104	8	134	0
ZH38T0051678	TSS	ENSG00000120509.10	PDZD11	protein_coding	0.977264	38857	606	295	3
ZH38T0050640	TSS	ENSG00000125482.13	TTF1	protein_coding	0.977239	38212	400	490	0
ZH38T0051172	TSS	ENSG00000102098.19	SCML2	protein_coding	0.977199	5443	94	33	0
ZH38T0050349	TSS	ENSG00000136940.13	PDCL	protein_coding	0.977194	80510	1212	666	1
ZH38T0023489	TSS	ENSG00000104969.10	SGTA	protein_coding	0.97717	81281	1088	811	0
ZH38T0013447	TSS	ENSG00000133115.11	STOML3	protein_coding	0.977169	214	1	4	0
ZH38T0021067	TSS	ENSG00000131477.11	RAMP2	protein_coding	0.977154	4320	17	84	0
ZH38T0022438	TSS	ENSG00000141526.16	SLC16A3	protein_coding	0.977151	727	2	15	0
ZH38T0048159	TSS	ENSG00000177459.11	ERICH5	protein_coding	0.977138	12224	38	248	0
ZH38T0025588	TSS	ENSG00000104805.16	NUCB1	protein_coding	0.977134	455882	2446	8218	4
ZH38T0036440	TSS	ENSG00000109758.8	HGFAC	protein_coding	0.977134	3675	47	39	0
ZH38T0050207	TSS	ENSG00000148229.13	POLE3	protein_coding	0.97713	5597	3	128	0
ZH38T0008695	TSS	ENSG00000168539.4	CHRM1	protein_coding	0.977128	1538	1	35	0
ZH38T0036595	TSS	ENSG00000118564.14	FBXL5	protein_coding	0.977115	268565	2323	3967	0
ZH38T0050080	TSS	ENSG00000106701.12	FSD1L	protein_coding	0.977113	1110	10	16	0
ZH38T0007551	TSS	ENSG00000130595.19	TNNT3	protein_coding	0.977111	5080	75	44	0
ZH38T0024291	TSS	ENSG00000053501.13	USE1	protein_coding	0.977106	91762	112	2038	0
ZH38T0001425	TSS	ENSG00000117450.14	PRDX1	protein_coding	0.977098	659685	4398	11055	9
ZH38T0006782	TSS	ENSG00000166197.16	NOLC1	protein_coding	0.977096	42405	108	886	0
ZH38T0031470	TSS	ENSG00000203880.12	PCMTD2	protein_coding	0.977094	65649	747	792	0
ZH38T0031018	TSS	ENSG00000124102.5	PI3	protein_coding	0.977087	16716	140	252	0
ZH38T0014929	TSS	ENSG00000131981.16	LGALS3	protein_coding	0.977079	263528	5758	424	0
ZH38T0025529	TSS	ENSG00000105447.12	GRWD1	protein_coding	0.977078	138236	25	3217	1
ZH38T0012744	TSS	ENSG00000166578.10	IQCD	protein_coding	0.977076	31839	168	579	0
ZH38T0018812	TSS	ENSG00000260268.6	LINC00919	lncRNA	0.977064	1704	0	40	0
ZH38T0052158	TSS	ENSG00000198918.8	RPL39	protein_coding	0.977059	138548	1691	1559	3
ZH38T0017422	TSS	ENSG00000140543.14, ENSG00000173867.10	DET1 , AC013489.1	protein_coding, protein_coding	0.97697	25792	56	552	0
ZH38T0009469	TSS	ENSG00000168959.14	GRM5	protein_coding	0.976959	4664	7	103	0
ZH38T0029404	TSS	ENSG00000116030.16	SUMO1	protein_coding	0.976957	2140512	18040	32432	16
ZH38T0045318	TSS	ENSG00000106089.12	STX1A	protein_coding	0.976944	105764	2468	28	0
ZH38T0043236	TSS	ENSG00000123552.17	USP45	protein_coding	0.976933	111426	1836	795	0
ZH38T0045595	TSS	ENSG00000205413.8	SAMD9	protein_coding	0.976916	28100	134	528	2
ZH38T0052350	TSS	ENSG00000129682.16	FGF13	protein_coding	0.976905	423	3	7	0
ZH38T0049276	TSS	ENSG00000137094.14	DNAJB5	protein_coding	0.976898	30235	84	631	0
ZH38T0032868	TSS	ENSG00000100226.16	GTPBP1	protein_coding	0.97689	21770	97	418	0
ZH38T0027524	TSS	ENSG00000116031.9	CD207	protein_coding	0.976864	380	2	7	0
ZH38T0011342	TSS	ENSG00000139644.13	TMBIM6	protein_coding	0.976849	355103	4728	3688	0
ZH38T0024345	TSS	ENSG00000007080.11	CCDC124	protein_coding	0.976845	80325	622	1282	0
ZH38T0000701	TSS	ENSG00000142676.14	RPL11	protein_coding	0.976844	850886	17186	2978	6
ZH38T0000783	TSS	ENSG00000117632.23	STMN1	protein_coding	0.976828	588438	13926	30	3
ZH38T0013884	TSS	ENSG00000136160.17	EDNRB	protein_coding	0.976827	68922	849	786	0
ZH38T0004717	TSS	ENSG00000233384.3	AC096537.1	lncRNA	0.976798	842	5	15	0
ZH38T0022370	TSS	ENSG00000185298.13	CCDC137	protein_coding	0.976794	65496	1086	469	1
ZH38T0034222	TSS	ENSG00000090097.21	PCBP4	protein_coding	0.976781	19604	180	286	0
ZH38T0025843	TSS	ENSG00000167755.15	KLK6	protein_coding	0.976768	967	10	13	0
ZH38T0051021	TSS	ENSG00000101825.8	MXRA5	protein_coding	0.976755	6219	67	81	0
ZH38T0003041	TSS	ENSG00000196154.12	S100A4	protein_coding	0.976742	41828	126	870	0
ZH38T0033303	TSS	ENSG00000170364.12	SETMAR	protein_coding	0.976708	39753	483	465	0
ZH38T0000224	TSS	ENSG00000049247.13	UTS2	protein_coding	0.976705	587	3	11	0
ZH38T0018471	TSS	ENSG00000184110.14	EIF3C	protein_coding	0.976701	15846	114	264	0
ZH38T0024108	TSS	ENSG00000179218.13	CALR	protein_coding	0.976666	224720	1233	4136	0
ZH38T0003209	TSS	ENSG00000177628.16	GBA	protein_coding	0.976664	44280	214	844	0
ZH38T0030487	TSS	ENSG00000125844.15	RRBP1	protein_coding	0.976645	431384	3252	7064	0
ZH38T0013173	TSS	ENSG00000121741.16	ZMYM2	protein_coding	0.976641	247602	3015	2907	0
ZH38T0047570	TSS	ENSG00000168575.10	SLC20A2	protein_coding	0.976623	2256	47	7	0
ZH38T0021581	TSS	ENSG00000121058.5	COIL	protein_coding	0.976607	55107	10	1310	0
ZH38T0001154	TSS	ENSG00000188786.10	MTF1	protein_coding	0.976606	11313	130	141	0
ZH38T0015818	TSS	ENSG00000126215.14	XRCC3	protein_coding	0.976602	12021	213	75	0
ZH38T0037207	TSS	ENSG00000156219.16	ART3	protein_coding	0.976601	26962	398	248	0
ZH38T0044348	TSS	ENSG00000106266.11	SNX8	protein_coding	0.9766	23872	547	25	0
ZH38T0000265	TSS	ENSG00000074800.16	ENO1	protein_coding	0.976586	1020812	13550	10920	4
ZH38T0018256	TSS	ENSG00000134419.15	RPS15A	protein_coding	0.976579	1174455	8397	19770	0
ZH38T0037077	TSS	ENSG00000126549.9	STATH	protein_coding	0.976575	8880	207	6	0
ZH38T0001292	TSS	ENSG00000197273.4	GUCA2A	protein_coding	0.976569	19047	232	223	2
ZH38T0017757	TSS	ENSG00000102854.16	MSLN	protein_coding	0.976564	5167	58	66	0
ZH38T0017927	TSS	ENSG00000162076.13	FLYWCH2	protein_coding	0.976558	158343	912	2889	0
ZH38T0040052	TSS	ENSG00000072682.18	P4HA2	protein_coding	0.976532	216960	2451	2763	0
ZH38T0023369	TSS	ENSG00000197561.7	ELANE	protein_coding	0.976526	832	6	14	0
ZH38T0049203	TSS	ENSG00000086065.14	CHMP5	protein_coding	0.976525	188149	2197	2326	0
ZH38T0011562	TSS	ENSG00000205352.11, ENSG00000257379.1	PRR13 , AC023509.1	protein_coding, lncRNA	0.976486	1415403	10359	23724	0
ZH38T0040261	TSS	ENSG00000249751.4, ENSG00000279686.1	ECSCR , AC142391.1	protein_coding, protein_coding	0.976463	90356	1538	640	0
ZH38T0026047	TSS	ENSG00000239998.6	LILRA2	protein_coding	0.976406	8732	6	205	0
ZH38T0006837	TSS	ENSG00000173915.16	ATP5MD	protein_coding	0.976393	1103918	6800	19886	4
ZH38T0032506	TSS	ENSG00000100280.16	AP1B1	protein_coding	0.976389	704169	8748	8274	6
ZH38T0027019	TSS	ENSG00000163214.21	DHX57	protein_coding	0.976385	13603	75	253	1
ZH38T0007240	TSS	ENSG00000108010.12	GLRX3	protein_coding	0.976373	247862	4914	1082	2
ZH38T0040574	TSS	ENSG00000070814.20	TCOF1	protein_coding	0.976367	898990	2020	19740	0
ZH38T0025307	TSS	ENSG00000130208.9	APOC1	protein_coding	0.976357	255702	1674	4518	0
ZH38T0007177	TSS	ENSG00000182022.18	CHST15	protein_coding	0.976345	16840	344	64	0
ZH38T0039817	TSS	ENSG00000164209.17	SLC25A46	protein_coding	0.976316	742	10	8	0
ZH38T0046176	TSS	ENSG00000105974.12	CAV1	protein_coding	0.976304	578466	4377	9660	3
ZH38T0036385	TSS	ENSG00000013810.19	TACC3	protein_coding	0.97627	13206	78	243	0
ZH38T0008331	TSS	ENSG00000110536.14	PTPMT1	protein_coding	0.97625	124962	258	2780	2
ZH38T0019251	TSS	ENSG00000140829.12	DHX38	protein_coding	0.976217	51391	163	1089	0
ZH38T0033964	TSS	ENSG00000163825.4	RTP3	protein_coding	0.976174	1393	0	34	0
ZH38T0034092	TSS	ENSG00000172046.19	USP19	protein_coding	0.976165	89364	410	1772	0
ZH38T0030952	TSS	ENSG00000124177.15	CHD6	protein_coding	0.976164	165700	3900	146	0
ZH38T0042891	TSS	ENSG00000151914.20	DST	protein_coding	0.976143	26923	373	285	0
ZH38T0040467	TSS	ENSG00000133706.18	LARS	protein_coding	0.976122	773760	2956	15972	0
ZH38T0031086	TSS	ENSG00000124160.12	NCOA5	protein_coding	0.976109	11072	146	125	0
ZH38T0002114	TSS	ENSG00000154511.12	DIPK1A	protein_coding	0.976107	121744	2532	436	12
ZH38T0023974	TSS	ENSG00000197256.10	KANK2	protein_coding	0.976106	284572	4846	2082	38
ZH38T0027111	TSS	ENSG00000068784.13	SRBD1	protein_coding	0.976097	86369	696	1419	0
ZH38T0020690	TSS	ENSG00000275385.1	CCL18	protein_coding	0.976095	3879	5	90	0
ZH38T0024104	TSS	ENSG00000105612.9	DNASE2	protein_coding	0.976079	27217	106	561	0
ZH38T0024074	TSS	ENSG00000105576.15	TNPO2	protein_coding	0.976053	16548	405	1	0
ZH38T0049437	TSS	ENSG00000287838.1	AL953883.1	lncRNA	0.976038	611	15	0	0
ZH38T0008292	TSS	ENSG00000175220.12	ARHGAP1	protein_coding	0.976019	155144	2881	930	1
ZH38T0001935	TSS	ENSG00000122420.10	PTGFR	protein_coding	0.976016	24986	20	594	0
ZH38T0039342	TSS	ENSG00000249437.7	NAIP	protein_coding	0.976004	7972	148	0	48
ZH38T0027982	TSS	ENSG00000163126.15	ANKRD23	protein_coding	0.976003	52101	801	480	0
ZH38T0050683	TSS	ENSG00000148303.17	RPL7A	protein_coding	0.976001	484981	7687	4238	0
ZH38T0000950	TSS	ENSG00000168528.12	SERINC2	protein_coding	0.97599	13821	210	130	0
ZH38T0035127	TSS	ENSG00000073111.14	MCM2	protein_coding	0.975983	37021	309	602	0
ZH38T0036989	TSS	ENSG00000174780.17	SRP72	protein_coding	0.975973	385935	2415	7086	0
ZH38T0045072	TSS	ENSG00000136270.14	TBRG4	protein_coding	0.975964	125955	1674	1428	0
ZH38T0013277	TSS	ENSG00000152484.14	USP12	protein_coding	0.975938	3407	84	0	0
ZH38T0037091	TSS	ENSG00000132464.12, ENSG00000286848.1	ENAM , AC009570.2	protein_coding, lncRNA	0.975935	2271	5	51	0
ZH38T0033400	TSS	ENSG00000157087.20	ATP2B2	protein_coding	0.975904	15309	123	255	0
ZH38T0025094	TSS	ENSG00000105323.16	HNRNPUL1	protein_coding	0.975904	14904	206	162	0
ZH38T0010921	TSS	ENSG00000287075.1	AC126468.1	lncRNA	0.975904	2187	49	5	0
ZH38T0028824	TSS	ENSG00000136531.16	SCN2A	protein_coding	0.975877	445	4	7	0
ZH38T0027479	TSS	ENSG00000115977.19	AAK1	protein_coding	0.975829	62900	908	650	0
ZH38T0046018	TSS	ENSG00000008282.8	SYPL1	protein_coding	0.975796	89338	970	1244	2
ZH38T0016925	TSS	ENSG00000103769.10	RAB11A	protein_coding	0.975795	808372	2628	17424	0
ZH38T0015179	TSS	ENSG00000100632.11	ERH	protein_coding	0.975783	222582	3960	1562	2
ZH38T0021254	TSS	ENSG00000262879.6	AC005670.3	lncRNA	0.97578	329350	3265	4910	0
ZH38T0024565	TSS	ENSG00000178904.19	DPY19L3	protein_coding	0.975761	8172	153	50	0
ZH38T0005937	TSS	ENSG00000227877.6	MRLN	protein_coding	0.975732	16002	94	304	0
ZH38T0050486	TSS	ENSG00000171159.5	C9orf16	protein_coding	0.975728	240034	1683	4288	0
ZH38T0042707	TSS	ENSG00000112759.18	SLC29A1	protein_coding	0.975698	5942	28	120	0
ZH38T0031982	TSS	ENSG00000241945.8	PWP2	protein_coding	0.975672	14478	341	20	0
ZH38T0052549	TSS	ENSG00000196924.17	FLNA	protein_coding	0.975651	157476	471	3459	0
ZH38T0023488	TSS	ENSG00000141873.11, ENSG00000267001.1	SLC39A3 , AC006538.3	protein_coding, protein_coding	0.975651	69240	1488	240	0
ZH38T0007664	TSS	ENSG00000121236.21	TRIM6	protein_coding	0.975624	9966	123	126	0
ZH38T0008515	TSS	ENSG00000110108.10	TMEM109	protein_coding	0.975612	53526	254	1083	1
ZH38T0012322	TSS	ENSG00000187510.9	C12orf74	protein_coding	0.97561	680	1	16	0
ZH38T0018750	TSS	ENSG00000261800.2	AC023824.5	lncRNA	0.97561	280	3	4	0
ZH38T0019937	TSS	ENSG00000040633.13	PHF23	protein_coding	0.975594	1479	11	26	0
ZH38T0023421	TSS	ENSG00000115286.20	NDUFS7	protein_coding	0.975587	608772	15162	66	6
ZH38T0016706	TSS	ENSG00000138587.6	MNS1	protein_coding	0.975571	16773	208	212	0
ZH38T0024751	TSS	ENSG00000011600.11	TYROBP	protein_coding	0.975567	510597	620	12168	0
ZH38T0025913	TSS	ENSG00000198093.11	ZNF649	protein_coding	0.975559	105058	2012	620	0
ZH38T0031812	TSS	ENSG00000159267.14	HLCS	protein_coding	0.975558	6426	151	10	0
ZH38T0052480	TSS	ENSG00000126895.15	AVPR2	protein_coding	0.975545	1476	0	37	0
ZH38T0038726	TSS	ENSG00000145569.6	OTULINL	protein_coding	0.975543	9334	102	132	0
ZH38T0019474	TSS	ENSG00000131153.9	GINS2	protein_coding	0.975526	44523	505	612	0
ZH38T0051495	TSS	ENSG00000068985.5	PAGE1	protein_coding	0.975518	1554	6	33	0
ZH38T0005708	TSS	ENSG00000108094.14	CUL2	protein_coding	0.975509	75678	962	938	0
ZH38T0012380	TSS	ENSG00000139343.10	SNRPF	protein_coding	0.975499	676884	15162	1839	0
ZH38T0008513	TSS	ENSG00000183134.5	PTGDR2	protein_coding	0.975486	1154	2	27	0
ZH38T0021425	TSS	ENSG00000108823.16	SGCA	protein_coding	0.975485	62312	1022	544	0
ZH38T0031022	TSS	ENSG00000124107.5	SLPI	protein_coding	0.97548	57366	368	1073	1
ZH38T0007625	TSS	ENSG00000110619.17	CARS	protein_coding	0.975468	202472	2588	2504	0
ZH38T0019827	TSS	ENSG00000091640.8	SPAG7	protein_coding	0.975464	232656	3130	2722	0
ZH38T0025491	TSS	ENSG00000024422.12	EHD2	protein_coding	0.975463	64006	684	926	0
ZH38T0027766	TSS	ENSG00000118640.11	VAMP8	protein_coding	0.975441	95084	1380	1014	0
ZH38T0001137	TSS	ENSG00000163874.11	ZC3H12A	protein_coding	0.975417	13570	335	7	0
ZH38T0004353	TSS	ENSG00000133069.17	TMCC2	protein_coding	0.97541	476	3	9	0
ZH38T0004282	TSS	ENSG00000122176.12	FMOD	protein_coding	0.975402	21770	328	221	0
ZH38T0030992	TSS	ENSG00000168734.14	PKIG	protein_coding	0.975385	189570	4284	500	0
ZH38T0047338	TSS	ENSG00000147419.18	CCDC25	protein_coding	0.975377	700083	13779	3894	0
ZH38T0047389	TSS	ENSG00000104660.18	LEPROTL1	protein_coding	0.975376	165416	3500	668	8
ZH38T0031872	TSS	ENSG00000185437.13	SH3BGR	protein_coding	0.975374	73392	658	1195	0
ZH38T0035795	TSS	ENSG00000171757.15	LRRC34	protein_coding	0.975332	2570	26	39	0
ZH38T0021066	TSS	ENSG00000108799.13	EZH1	protein_coding	0.975319	167950	2520	1715	15
ZH38T0050504	TSS	ENSG00000136811.16	ODF2	protein_coding	0.975309	316	5	3	0
ZH38T0048180	TSS	ENSG00000147669.11	POLR2K	protein_coding	0.975305	193438	2604	2292	2
ZH38T0002728	TSS	ENSG00000265107.3	GJA5	protein_coding	0.975296	987	0	25	0
ZH38T0008394	TSS	ENSG00000172409.6	CLP1	protein_coding	0.975291	28893	153	579	0
ZH38T0026144	TSS	ENSG00000173581.7	CCDC106	protein_coding	0.97529	32996	14	822	0
ZH38T0025221	TSS	ENSG00000105755.8	ETHE1	protein_coding	0.975277	53492	206	1150	0
ZH38T0026622	TSS	ENSG00000055917.15	PUM2	protein_coding	0.975273	11793	211	88	0
ZH38T0046467	TSS	ENSG00000122786.20	CALD1	protein_coding	0.975244	646095	2238	14163	0
ZH38T0027315	TSS	ENSG00000237651.6	C2orf74	protein_coding	0.975241	80828	1044	1008	0
ZH38T0011922	TSS	ENSG00000257953.1	AC083805.2	lncRNA	0.975186	786	8	12	0
ZH38T0020488	TSS	ENSG00000109113.20	RAB34	protein_coding	0.97518	52964	424	924	0
ZH38T0035601	TSS	ENSG00000114790.13	ARHGEF26	protein_coding	0.975175	50910	24	1272	0
ZH38T0029290	TSS	ENSG00000144381.17	HSPD1	protein_coding	0.975171	226499	3440	2325	2
ZH38T0034202	TSS	ENSG00000114738.11	MAPKAPK3	protein_coding	0.975163	84650	1386	770	0
ZH38T0003007	TSS	ENSG00000169469.9	SPRR1B	protein_coding	0.975162	25834	3	655	0
ZH38T0004096	TSS	ENSG00000116785.13	CFHR3	protein_coding	0.975131	26036	240	424	0
ZH38T0049879	TSS	ENSG00000131669.10	NINJ1	protein_coding	0.97513	51010	539	760	2
ZH38T0014897	TSS	ENSG00000100522.10	GNPNAT1	protein_coding	0.975126	314952	1986	6045	3
ZH38T0049188	TSS	ENSG00000086061.16	DNAJA1	protein_coding	0.975124	281692	1839	5346	1
ZH38T0049376	TSS	ENSG00000235387.4	SPAAR	protein_coding	0.975086	1135	1	28	0
ZH38T0051192	TSS	ENSG00000184368.16	MAP7D2	protein_coding	0.975062	782	14	6	0
ZH38T0051376	TSS	ENSG00000231566.2, ENSG00000270069.1	LINC02595 , MIR222HG	lncRNA, lncRNA	0.975055	20248	346	172	0
ZH38T0047299	TSS	ENSG00000104765.16	BNIP3L	protein_coding	0.975049	5002	118	10	0
ZH38T0008991	TSS	ENSG00000174547.13	MRPL11	protein_coding	0.975018	345993	312	8553	0
ZH38T0025011	TSS	ENSG00000013275.7	PSMC4	protein_coding	0.975013	73125	582	1292	0
ZH38T0025364	TSS	ENSG00000213889.10	PPM1N	protein_coding	0.975	1287	5	28	0
ZH38T0011043	TSS	ENSG00000061794.13	MRPS35	protein_coding	0.974997	303066	1710	6024	38
ZH38T0034476	TSS	ENSG00000163378.14	EOGT	protein_coding	0.974992	84290	2038	124	0
ZH38T0008324	TSS	ENSG00000165915.14	SLC39A13	protein_coding	0.97499	22689	426	156	0
ZH38T0032557	TSS	ENSG00000184792.16	OSBP2	protein_coding	0.974956	6657	114	57	0
ZH38T0035614	TSS	ENSG00000240045.2	STRIT1	protein_coding	0.974947	9729	96	154	0
ZH38T0005938	TSS	ENSG00000235931.2	LINC01553	lncRNA	0.97493	350	8	1	0
ZH38T0009969	TSS	ENSG00000118181.11	RPS25	protein_coding	0.974917	424932	3741	7192	0
ZH38T0016207	TSS	ENSG00000159251.7	ACTC1	protein_coding	0.974912	61009	407	1163	0
ZH38T0042079	TSS	ENSG00000204520.13	MICA	protein_coding	0.974899	9205	143	94	0
ZH38T0000939	TSS	ENSG00000134644.15	PUM1	protein_coding	0.974898	650920	12485	4275	0
ZH38T0019574	TSS	ENSG00000167523.13	SPATA33	protein_coding	0.974896	26330	150	528	0
ZH38T0021116	TSS	ENSG00000175906.5	ARL4D	protein_coding	0.974895	12737	16	312	0
ZH38T0015927	TSS	ENSG00000211890.4, ENSG00000211893.4, ENSG00000211896.7, ENSG00000211899.10, ENSG00000282122.1	IGHA2 , IGHG2 , IGHG1 , IGHM , IGHV7-4-1	IG_C_gene, IG_C_gene, IG_C_gene, IG_C_gene, IG_V_gene	0.974891	3572	7	85	0
ZH38T0051701	TSS	ENSG00000196338.12	NLGN3	protein_coding	0.974877	41288	120	944	0
ZH38T0040328	TSS	ENSG00000146007.10	ZMAT2	protein_coding	0.974872	4384	13	100	0
ZH38T0022356	TSS	ENSG00000184009.12	ACTG1	protein_coding	0.97486	2650894	23180	45171	10
ZH38T0012955	TSS	ENSG00000139726.11	DENR	protein_coding	0.974856	472536	8562	3622	4
ZH38T0031033	TSS	ENSG00000244274.7	DBNDD2	protein_coding	0.974822	13396	2	344	0
ZH38T0039240	TSS	ENSG00000153006.16	SREK1IP1	protein_coding	0.974814	160780	2212	1942	0
ZH38T0017817	TSS	ENSG00000063854.13	HAGH	protein_coding	0.974811	6966	177	3	0
ZH38T0010008	TSS	ENSG00000154096.13	THY1	protein_coding	0.9748	81544	1325	783	0
ZH38T0019198	TSS	ENSG00000196696.12, ENSG00000255185.5	AC009022.1 , PDXDC2P	lncRNA, transcribed_unprocessed_pseudogene	0.974797	396055	7035	3205	0
ZH38T0026623	TSS	ENSG00000055917.15	PUM2	protein_coding	0.974793	12839	213	119	0
ZH38T0009938	TSS	ENSG00000095139.14	ARCN1	protein_coding	0.974782	729215	1080	17785	0
ZH38T0000487	TSS	ENSG00000080947.15	CROCCP3	transcribed_unprocessed_pseudogene	0.974777	9816	236	18	0
ZH38T0050564	TSS	ENSG00000119383.19	PTPA	protein_coding	0.974765	9734	32	220	0
ZH38T0006877	TSS	ENSG00000148834.13	GSTO1	protein_coding	0.974738	136089	1869	1658	0
ZH38T0040232	TSS	ENSG00000044115.21	CTNNA1	protein_coding	0.974733	542394	13928	92	40
ZH38T0003998	TSS	ENSG00000135842.17	FAM129A	protein_coding	0.974728	132677	1632	1808	0
ZH38T0016647	TSS	ENSG00000128989.10	ARPP19	protein_coding	0.974721	565494	5257	9409	0
ZH38T0040900	TSS	ENSG00000214360.4	EFCAB9	protein_coding	0.974684	154	3	1	0
ZH38T0014218	TSS	ENSG00000150403.18	TMCO3	protein_coding	0.974654	80754	498	1599	3
ZH38T0045716	TSS	ENSG00000130429.15	ARPC1B	protein_coding	0.974636	606291	10934	4844	0
ZH38T0008928	TSS	ENSG00000172922.9	RNASEH2C	protein_coding	0.974634	39729	77	957	0
ZH38T0039911	TSS	ENSG00000133835.16	HSD17B4	protein_coding	0.974628	831280	9480	12156	4
ZH38T0021761	TSS	ENSG00000108588.14	CCDC47	protein_coding	0.974605	731866	5895	13172	3
ZH38T0027266	TSS	ENSG00000143947.13	RPS27A	protein_coding	0.974584	227539	1328	4605	1
ZH38T0017973	TSS	ENSG00000103351.13	CLUAP1	protein_coding	0.974574	124305	1245	1998	0
ZH38T0019940	TSS	ENSG00000170296.10	GABARAP	protein_coding	0.974568	1309702	363	33815	0
ZH38T0018596	TSS	ENSG00000102879.15	CORO1A	protein_coding	0.974557	12219	244	75	0
ZH38T0012983	TSS	ENSG00000051825.14	MPHOSPH9	protein_coding	0.974548	44378	685	473	1
ZH38T0008976	TSS	ENSG00000174903.16	RAB1B	protein_coding	0.974503	257602	2792	3948	0
ZH38T0024571	TSS	ENSG00000105186.16	ANKRD27	protein_coding	0.974498	130152	3340	66	0
ZH38T0042098	TSS	ENSG00000204482.10	LST1	protein_coding	0.974497	55788	1388	72	0
ZH38T0020637	TSS	ENSG00000181374.8	CCL13	protein_coding	0.974495	2751	30	42	0
ZH38T0018569	TSS	ENSG00000149925.20	ALDOA	protein_coding	0.974476	140461	384	3295	0
ZH38T0002475	TSS	ENSG00000009307.16	CSDE1	protein_coding	0.974473	1574202	12404	28826	7
ZH38T0008659	TSS	ENSG00000177363.5	LRRN4CL	protein_coding	0.974454	8125	2	211	0
ZH38T0045317	TSS	ENSG00000071462.11	BUD23	protein_coding	0.974448	108764	1268	1584	0
ZH38T0045061	TSS	ENSG00000105968.18	H2AFV	protein_coding	0.97441	72996	1749	168	0
ZH38T0010520	TSS	ENSG00000111667.13	USP5	protein_coding	0.974391	109808	690	2196	0
ZH38T0003854	TSS	ENSG00000240021.10	TEX35	protein_coding	0.974389	39682	850	193	0
ZH38T0032789	TSS	ENSG00000100101.15, ENSG00000273899.5	Z83844.1 , NOL12	protein_coding, protein_coding	0.974388	167316	546	3852	0
ZH38T0042787	TSS	ENSG00000146085.8	MMUT	protein_coding	0.97438	22211	191	393	0
ZH38T0000065	TSS	ENSG00000160075.12	SSU72	protein_coding	0.974353	73968	76	1871	0
ZH38T0050325	TSS	ENSG00000204136.10	GGTA1P	transcribed_unitary_pseudogene	0.974348	21878	282	294	0
ZH38T0031729	TSS	ENSG00000159140.20	SON	protein_coding	0.974329	1613188	2080	40420	4
ZH38T0020674	TSS	ENSG00000270806.2	C17orf50	protein_coding	0.974296	2388	36	27	0
ZH38T0021747	TSS	ENSG00000008283.16	CYB561	protein_coding	0.97428	55912	1444	32	0
ZH38T0018725	TSS	ENSG00000176723.10	ZNF843	protein_coding	0.974277	1515	1	39	0
ZH38T0046292	TSS	ENSG00000174697.5	LEP	protein_coding	0.974271	9126	148	93	0
ZH38T0052167	TSS	ENSG00000186471.12	AKAP14	protein_coding	0.974271	1136	24	6	0
ZH38T0037808	TSS	ENSG00000164111.15	ANXA5	protein_coding	0.974253	654312	7290	9999	3
ZH38T0050837	TSS	ENSG00000188229.6	TUBB4B	protein_coding	0.974243	78069	31	2033	0
ZH38T0021006	TSS	ENSG00000173801.17	JUP	protein_coding	0.974218	109126	1124	1764	0
ZH38T0028000	TSS	ENSG00000135940.6	COX5B	protein_coding	0.974201	293862	2694	5088	0
ZH38T0026453	TSS	ENSG00000171848.15	RRM2	protein_coding	0.974188	27400	39	687	0
ZH38T0041989	TSS	ENSG00000204569.10	PPP1R10	protein_coding	0.974148	54488	26	1420	0
ZH38T0026083	TSS	ENSG00000105048.17	TNNT1	protein_coding	0.974142	442350	10830	894	18
ZH38T0043393	TSS	ENSG00000056972.20	TRAF3IP2	protein_coding	0.974138	791	4	17	0
ZH38T0037155	TSS	ENSG00000163737.3	PF4	protein_coding	0.974124	3727	2	97	0
ZH38T0020758	TSS	ENSG00000277791.5	PSMB3	protein_coding	0.974106	229405	4988	1110	0
ZH38T0036739	TSS	ENSG00000181826.10	RELL1	protein_coding	0.974094	121224	2540	682	2
ZH38T0042522	TSS	ENSG00000146122.17	DAAM2	protein_coding	0.974082	22061	553	34	0
ZH38T0050417	TSS	ENSG00000177125.5	ZBTB34	protein_coding	0.974081	2518	67	0	0
ZH38T0019657	TSS	ENSG00000108953.17	YWHAE	protein_coding	0.974079	3240068	35392	50744	84
ZH38T0052445	TSS	ENSG00000198883.12	PNMA5	protein_coding	0.974074	526	11	3	0
ZH38T0029349	TSS	ENSG00000082153.18	BZW1	protein_coding	0.974067	175524	4491	179	3
ZH38T0027322	TSS	ENSG00000115464.14	USP34	protein_coding	0.974057	40212	912	159	0
ZH38T0048077	TSS	ENSG00000188343.12	FAM92A	protein_coding	0.974053	304971	4242	3882	0
ZH38T0011692	TSS	ENSG00000123353.10	ORMDL2	protein_coding	0.97404	81720	717	1461	0
ZH38T0022529	TSS	ENSG00000101608.12	MYL12A	protein_coding	0.974037	36166	56	908	0
ZH38T0028119	TSS	ENSG00000225765.2	LINC01831	lncRNA	0.974026	600	1	15	0
ZH38T0027185	TSS	ENSG00000243244.6	STON1	protein_coding	0.974003	80139	674	1465	0
ZH38T0006343	TSS	ENSG00000107771.17	CCSER2	protein_coding	0.973996	24196	72	574	0
ZH38T0027142	TSS	ENSG00000180398.12	MCFD2	protein_coding	0.973977	4117	73	37	0
ZH38T0017979	TSS	ENSG00000126602.11	TRAP1	protein_coding	0.97393	5006	126	8	0
ZH38T0030173	TSS	ENSG00000115677.17	HDLBP	protein_coding	0.973928	103846	2720	60	0
ZH38T0034149	TSS	ENSG00000003756.16	RBM5	protein_coding	0.973923	593680	12114	3782	0
ZH38T0041971	TSS	ENSG00000241370.5	RPP21	protein_coding	0.973919	464384	204	12232	0
ZH38T0002813	TSS	ENSG00000143401.15	ANP32E	protein_coding	0.973913	1568	0	42	0
ZH38T0020450	TSS	ENSG00000109084.14	TMEM97	protein_coding	0.973888	190738	42	5072	0
ZH38T0051597	TSS	ENSG00000238269.8	PAGE2B	protein_coding	0.973873	3802	42	60	0
ZH38T0025202	TSS	ENSG00000231924.9	PSG1	protein_coding	0.973856	2235	15	45	0
ZH38T0009344	TSS	ENSG00000074201.8	CLNS1A	protein_coding	0.973772	1218865	6520	26305	5
ZH38T0035986	TSS	ENSG00000114867.20	EIF4G1	protein_coding	0.973767	382854	3936	6378	0
ZH38T0048171	TSS	ENSG00000132549.18	VPS13B	protein_coding	0.973745	151320	2388	1664	28
ZH38T0027866	TSS	ENSG00000211592.8, ENSG00000239951.1	IGKC , IGKV3-20	IG_C_gene, IG_V_gene	0.973738	21616	79	501	3
ZH38T0007166	TSS	ENSG00000154473.18	BUB3	protein_coding	0.973729	283656	3546	4107	0
ZH38T0042230	TSS	ENSG00000204287.14	HLA-DRA	protein_coding	0.973703	200760	48	5374	0
ZH38T0031153	TSS	ENSG00000124228.14	DDX27	protein_coding	0.973683	542202	6861	7794	0
ZH38T0022550	TSS	ENSG00000266835.6	GAPLINC	lncRNA	0.973673	9172	224	24	0
ZH38T0019661	TSS	ENSG00000197879.17	MYO1C	protein_coding	0.973671	24999	675	0	1
ZH38T0032681	TSS	ENSG00000100297.16	MCM5	protein_coding	0.97367	68560	412	1442	0
ZH38T0020470	TSS	ENSG00000109107.14	ALDOC	protein_coding	0.973667	57459	96	1458	0
ZH38T0046680	TSS	ENSG00000055130.17	CUL1	protein_coding	0.973621	9744	202	62	0
ZH38T0038593	TSS	ENSG00000073578.17, ENSG00000286001.1	SDHA , AC021087.5	protein_coding, protein_coding	0.973602	793315	21315	195	0
ZH38T0000796	TSS	ENSG00000175087.10	PDIK1L	protein_coding	0.973582	52700	640	790	0
ZH38T0009545	TSS	ENSG00000150316.12	CWC15	protein_coding	0.973567	239444	2489	4008	4
ZH38T0032548	TSS	ENSG00000100029.18	PES1	protein_coding	0.973559	219591	5274	690	0
ZH38T0043112	TSS	ENSG00000135316.17	SYNCRIP	protein_coding	0.973543	317266	6388	2232	2
ZH38T0048724	TSS	ENSG00000183309.11	ZNF623	protein_coding	0.973529	13718	318	55	0
ZH38T0026427	TSS	ENSG00000119185.12	ITGB1BP1	protein_coding	0.973519	216460	4012	1864	12
ZH38T0008476	TSS	ENSG00000166902.5	MRPL16	protein_coding	0.973517	128071	1276	2206	2
ZH38T0030190	TSS	ENSG00000176946.12	THAP4	protein_coding	0.973507	12714	136	210	0
ZH38T0020326	TSS	ENSG00000108448.21	TRIM16L	protein_coding	0.973497	11754	97	223	0
ZH38T0004016	TSS	ENSG00000116690.12	PRG4	protein_coding	0.973496	126056	652	2780	0
ZH38T0003933	TSS	ENSG00000135829.17	DHX9	protein_coding	0.973482	93941	1825	734	0
ZH38T0010075	TSS	ENSG00000109971.14	HSPA8	protein_coding	0.973473	492120	8008	5398	4
ZH38T0031660	TSS	ENSG00000156273.16	BACH1	protein_coding	0.973469	42452	1005	152	0
ZH38T0038167	TSS	ENSG00000121211.7	MND1	protein_coding	0.97346	188460	5090	48	0
ZH38T0020330	TSS	ENSG00000141127.15	PRPSAP2	protein_coding	0.973455	33812	593	329	0
ZH38T0016535	TSS	ENSG00000137767.14	SQOR	protein_coding	0.973422	293	4	4	0
ZH38T0052246	TSS	ENSG00000134597.16	RBMX2	protein_coding	0.973404	128464	614	2896	0
ZH38T0026089	TSS	ENSG00000129991.13	TNNI3	protein_coding	0.973395	93734	370	2192	0
ZH38T0050138	TSS	ENSG00000241978.9	AKAP2	protein_coding	0.973384	16384	36	412	0
ZH38T0039566	TSS	ENSG00000127184.13	COX7C	protein_coding	0.973376	2086197	531	56526	6
ZH38T0050179	TSS	ENSG00000119314.15	PTBP3	protein_coding	0.973358	340936	6840	2416	76
ZH38T0008020	TSS	ENSG00000109854.13	HTATIP2	protein_coding	0.973352	147200	895	3135	0
ZH38T0048433	TSS	ENSG00000136986.10	DERL1	protein_coding	0.973346	2045	17	39	0
ZH38T0048009	TSS	ENSG00000133742.13	CA1	protein_coding	0.973323	2554	58	12	0
ZH38T0017814	TSS	ENSG00000099769.5	IGFALS	protein_coding	0.973314	2626	0	72	0
ZH38T0008982	TSS	ENSG00000174744.14	BRMS1	protein_coding	0.973284	191042	2706	2538	0
ZH38T0026702	TSS	ENSG00000119772.16	DNMT3A	protein_coding	0.973258	2402	44	22	0
ZH38T0008616	TSS	ENSG00000124942.14	AHNAK	protein_coding	0.973227	31371	93	770	0
ZH38T0016571	TSS	ENSG00000166200.15	COPS2	protein_coding	0.973191	418404	5127	6390	9
ZH38T0047975	TSS	ENSG00000147588.7	PMP2	protein_coding	0.97319	46972	320	974	0
ZH38T0020491	TSS	ENSG00000198242.14	RPL23A	protein_coding	0.973188	10272	3	280	0
ZH38T0046763	TSS	ENSG00000164885.13	CDK5	protein_coding	0.973159	57648	434	1156	0
ZH38T0046581	TSS	ENSG00000090263.16	MRPS33	protein_coding	0.973158	24943	381	307	0
ZH38T0013986	TSS	ENSG00000065150.20	IPO5	protein_coding	0.973154	51475	924	496	0
ZH38T0010521	TSS	ENSG00000111669.15	TPI1	protein_coding	0.973148	445118	1536	10742	4
ZH38T0050688	TSS	ENSG00000148290.10	SURF1	protein_coding	0.973145	7320	124	78	0
ZH38T0008947	TSS	ENSG00000172500.12	FIBP	protein_coding	0.97313	169059	1119	3549	0
ZH38T0020685	TSS	ENSG00000275722.5	LYZL6	protein_coding	0.973105	1592	16	28	0
ZH38T0049257	TSS	ENSG00000137100.16	DCTN3	protein_coding	0.973095	275780	2815	4810	0
ZH38T0030272	TSS	ENSG00000125900.13, ENSG00000242324.1	SIRPD , AL049634.1	protein_coding, unprocessed_pseudogene	0.973087	5532	114	39	0
ZH38T0029746	TSS	ENSG00000182698.11	RESP18	protein_coding	0.973064	578	0	16	0
ZH38T0023335	TSS	ENSG00000141934.10	PLPP2	protein_coding	0.973051	39790	324	778	0
ZH38T0021143	TSS	ENSG00000091947.10	TMEM101	protein_coding	0.973038	44174	126	1098	0
ZH38T0032923	TSS	ENSG00000100354.21	TNRC6B	protein_coding	0.973031	51486	949	475	3
ZH38T0023900	TSS	ENSG00000167807.15, ENSG00000267673.6	AC011511.1 , FDX2	protein_coding, protein_coding	0.972973	95904	15	2649	0
ZH38T0001805	TSS	ENSG00000162594.15	IL23R	protein_coding	0.972973	468	11	2	0
ZH38T0050174	TSS	ENSG00000165181.16	SHOC1	protein_coding	0.972973	360	5	5	0
ZH38T0049954	TSS	ENSG00000158122.12	PRXL2C	protein_coding	0.972955	2986	65	18	0
ZH38T0052237	TSS	ENSG00000188706.13	ZDHHC9	protein_coding	0.97295	24135	306	364	1
ZH38T0047354	TSS	ENSG00000186918.14	ZNF395	protein_coding	0.972946	1942	52	2	0
ZH38T0044420	TSS	ENSG00000011275.18	RNF216	protein_coding	0.972935	138040	3057	783	0
ZH38T0023698	TSS	ENSG00000125652.8	ALKBH7	protein_coding	0.972924	1617	19	26	0
ZH38T0023661	TSS	ENSG00000130255.13	RPL36	protein_coding	0.972899	989243	312	27235	9
ZH38T0013097	TSS	ENSG00000132341.12	RAN	protein_coding	0.972889	1397331	1635	37304	0
ZH38T0012296	TSS	ENSG00000139330.5	KERA	protein_coding	0.972885	4162	0	116	0
ZH38T0033505	TSS	ENSG00000206562.11	METTL6	protein_coding	0.972881	128000	1700	1868	0
ZH38T0038504	TSS	ENSG00000168491.10	CCDC110	protein_coding	0.972871	11619	270	54	0
ZH38T0016367	TSS	ENSG00000137815.14	RTF1	protein_coding	0.972865	115625	804	2421	0
ZH38T0034816	TSS	ENSG00000177494.6	ZBED2	protein_coding	0.972849	4228	11	106	1
ZH38T0026336	TSS	ENSG00000115705.21	TPO	protein_coding	0.972829	6588	92	92	0
ZH38T0006199	TSS	ENSG00000148660.20	CAMK2G	protein_coding	0.972827	305998	4788	3759	0
ZH38T0029741	TSS	ENSG00000127824.14	TUBA4A	protein_coding	0.972825	29856	490	344	0
ZH38T0033954	TSS	ENSG00000163823.4	CCR1	protein_coding	0.972814	9268	2	257	0
ZH38T0001015	TSS	ENSG00000254553.1, ENSG00000273274.2	AL033529.1 , ZBTB8B	protein_coding, protein_coding	0.972809	6726	98	90	0
ZH38T0022832	TSS	ENSG00000046604.13	DSG2	protein_coding	0.972798	92266	694	1886	0
ZH38T0032958	TSS	ENSG00000100380.14	ST13	protein_coding	0.972797	1410038	8572	30858	0
ZH38T0021491	TSS	ENSG00000108846.16	ABCC3	protein_coding	0.972759	48922	1120	246	4
ZH38T0001445	TSS	ENSG00000159596.7	TMEM69	protein_coding	0.972755	73658	162	1901	0
ZH38T0000055	TSS	ENSG00000242485.6	MRPL20	protein_coding	0.972752	531206	3752	11128	0
ZH38T0011168	TSS	ENSG00000139174.12	PRICKLE1	protein_coding	0.972745	8994	120	132	0
ZH38T0037449	TSS	ENSG00000180346.3	TIGD2	protein_coding	0.972742	18593	10	511	0
ZH38T0047184	TSS	ENSG00000158856.18	DMTN	protein_coding	0.972711	15933	147	300	0
ZH38T0051992	TSS	ENSG00000123576.5	ESX1	protein_coding	0.972707	891	6	19	0
ZH38T0002372	TSS	ENSG00000134255.14	CEPT1	protein_coding	0.972707	90095	1268	1259	1
ZH38T0022005	TSS	ENSG00000109062.12	SLC9A3R1	protein_coding	0.972682	2172	12	49	0
ZH38T0020307	TSS	ENSG00000177427.13	MIEF2	protein_coding	0.97268	60525	190	1510	0
ZH38T0028939	TSS	ENSG00000091428.18	RAPGEF4	protein_coding	0.972663	2633	67	7	0
ZH38T0031407	TSS	ENSG00000101191.16	DIDO1	protein_coding	0.972657	123364	3420	44	4
ZH38T0044321	TSS	ENSG00000164880.16	INTS1	protein_coding	0.972638	3448	41	56	0
ZH38T0050665	TSS	ENSG00000160271.16	RALGDS	protein_coding	0.97263	1990	28	28	0
ZH38T0018515	TSS	ENSG00000174992.7	ZG16	protein_coding	0.972617	7743	71	147	0
ZH38T0021371	TSS	ENSG00000159199.14	ATP5MC1	protein_coding	0.97261	692250	10910	8585	0
ZH38T0030293	TSS	ENSG00000101361.17	NOP56	protein_coding	0.972608	34726	464	514	0
ZH38T0006722	TSS	ENSG00000166136.16, ENSG00000255339.6	NDUFB8 , AL133352.1	protein_coding, protein_coding	0.972529	527730	10272	4632	3
ZH38T0012901	TSS	ENSG00000139725.8	RHOF	protein_coding	0.972528	35295	181	816	0
ZH38T0024510	TSS	ENSG00000196081.9	ZNF724	protein_coding	0.972523	49056	738	648	0
ZH38T0047618	TSS	ENSG00000253729.7	PRKDC	protein_coding	0.972499	420456	554	11332	4
ZH38T0033211	TSS	ENSG00000170638.9	TRABD	protein_coding	0.972484	43612	1218	16	0
ZH38T0026593	TSS	ENSG00000163029.16	SMC6	protein_coding	0.972475	174534	730	4210	0
ZH38T0023251	TSS	ENSG00000176225.13	RTTN	protein_coding	0.972459	27188	307	463	0
ZH38T0021757	TSS	ENSG00000136490.9	LIMD2	protein_coding	0.972458	24045	591	90	0
ZH38T0026109	TSS	ENSG00000133265.11	HSPBP1	protein_coding	0.972455	14404	21	387	0
ZH38T0005727	TSS	ENSG00000198105.14	ZNF248	protein_coding	0.972454	11085	156	158	0
ZH38T0002073	TSS	ENSG00000233593.10	LINC02609	lncRNA	0.972447	1200	1	33	0
ZH38T0019963	TSS	ENSG00000132522.16	GPS2	protein_coding	0.972441	475969	2070	11419	0
ZH38T0002041	TSS	ENSG00000137947.12	GTF2B	protein_coding	0.972432	114041	2171	1061	1
ZH38T0010257	TSS	ENSG00000166086.12	JAM3	protein_coding	0.972421	39667	995	130	0
ZH38T0019008	TSS	ENSG00000179776.19	CDH5	protein_coding	0.972406	187971	2148	3186	0
ZH38T0016408	TSS	ENSG00000103994.17	ZNF106	protein_coding	0.972361	153038	584	3766	0
ZH38T0021230	TSS	ENSG00000159314.11	ARHGAP27	protein_coding	0.972357	2005	3	54	0
ZH38T0052592	TSS	ENSG00000160211.18	G6PD	protein_coding	0.972349	8088	96	134	0
ZH38T0008943	TSS	ENSG00000172638.13	EFEMP2	protein_coding	0.972343	25524	86	640	0
ZH38T0047103	TSS	ENSG00000104763.19	ASAH1	protein_coding	0.972328	1019	1	28	0
ZH38T0014792	TSS	ENSG00000213741.10	RPS29	protein_coding	0.972319	177001	498	4532	9
ZH38T0009002	TSS	ENSG00000173933.20	RBM4	protein_coding	0.972318	666816	1128	17856	0
ZH38T0000355	TSS	ENSG00000116670.15	MAD2L2	protein_coding	0.972312	7234	182	24	0
ZH38T0009453	TSS	ENSG00000150687.12	PRSS23	protein_coding	0.972309	78794	2164	80	0
ZH38T0018926	TSS	ENSG00000088682.14	COQ9	protein_coding	0.972295	244890	5745	1233	0
ZH38T0029460	TSS	ENSG00000114942.14	EEF1B2	protein_coding	0.972292	154261	849	3546	1
ZH38T0046485	TSS	ENSG00000155561.15	NUP205	protein_coding	0.972292	27827	287	506	0
ZH38T0019047	TSS	ENSG00000067955.15	CBFB	protein_coding	0.972287	2912	81	2	0
ZH38T0011655	TSS	ENSG00000123338.13	NCKAP1L	protein_coding	0.972282	27957	335	462	0
ZH38T0021029	TSS	ENSG00000108774.14, ENSG00000267261.5	RAB5C , AC099811.2	protein_coding, protein_coding	0.972279	306195	3723	5007	0
ZH38T0043910	TSS	ENSG00000146414.16	SHPRH	protein_coding	0.972268	119271	231	3171	0
ZH38T0014821	TSS	ENSG00000165527.7	ARF6	protein_coding	0.972238	35230	0	1006	0
ZH38T0052368	TSS	ENSG00000227234.2	SPANXB1	protein_coding	0.972222	560	1	15	0
ZH38T0020835	TSS	ENSG00000172057.10	ORMDL3	protein_coding	0.972222	210	0	6	0
ZH38T0050784	TSS	ENSG00000177984.7	LCN15	protein_coding	0.972222	105	1	2	0
ZH38T0004250	TSS	ENSG00000159346.13	ADIPOR1	protein_coding	0.972185	255082	6836	462	0
ZH38T0026722	TSS	ENSG00000138029.14	HADHB	protein_coding	0.972156	205928	4496	1400	2
ZH38T0046908	TSS	ENSG00000104728.16	ARHGEF10	protein_coding	0.972133	907	13	13	0
ZH38T0015957	TSS	ENSG00000211955.2	IGHV3-33	IG_V_gene	0.97213	6174	1	169	7
ZH38T0006082	TSS	ENSG00000180817.12	PPA1	protein_coding	0.972115	316892	7378	1710	2
ZH38T0034266	TSS	ENSG00000010322.16	NISCH	protein_coding	0.972109	163221	3012	1671	0
ZH38T0016413	TSS	ENSG00000137814.11	HAUS2	protein_coding	0.972107	228208	664	5884	0
ZH38T0009255	TSS	ENSG00000175564.13	UCP3	protein_coding	0.972105	13382	58	326	0
ZH38T0017921	TSS	ENSG00000007038.11	PRSS21	protein_coding	0.9721	5087	97	49	0
ZH38T0026993	TSS	ENSG00000115841.20	RMDN2	protein_coding	0.972054	15757	95	358	0
ZH38T0029597	TSS	ENSG00000225794.3	AC073321.1	lncRNA	0.972028	139	1	3	0
ZH38T0050217	TSS	ENSG00000157657.14	ZNF618	protein_coding	0.972004	28644	732	93	0
ZH38T0043583	TSS	ENSG00000111912.20	NCOA7	protein_coding	0.971996	75528	1040	1134	2
ZH38T0039539	TSS	ENSG00000174695.10	TMEM167A	protein_coding	0.971967	291980	4638	3772	11
ZH38T0007393	TSS	ENSG00000177697.19	CD151	protein_coding	0.971967	243915	6981	54	0
ZH38T0028201	TSS	ENSG00000169679.15	BUB1	protein_coding	0.971964	61155	684	1080	0
ZH38T0019531	TSS	ENSG00000051523.11	CYBA	protein_coding	0.971957	237279	2568	4266	12
ZH38T0006192	TSS	ENSG00000172586.8	CHCHD1	protein_coding	0.971934	101050	8	2910	0
ZH38T0051076	TSS	ENSG00000005302.18	MSL3	protein_coding	0.971921	106854	2247	840	0
ZH38T0017996	TSS	ENSG00000217930.8	PAM16	protein_coding	0.971916	101746	2862	78	0
ZH38T0018185	TSS	ENSG00000072864.15	NDE1	protein_coding	0.971902	40954	967	217	0
ZH38T0015509	TSS	ENSG00000100764.14	PSMC1	protein_coding	0.971892	420324	3570	8580	6
ZH38T0020730	TSS	ENSG00000278053.5	DDX52	protein_coding	0.97189	61889	514	1275	1
ZH38T0042382	TSS	ENSG00000124562.10	SNRPC	protein_coding	0.971855	458703	2826	10452	6
ZH38T0031431	TSS	ENSG00000197457.10	STMN3	protein_coding	0.971838	45931	1175	155	1
ZH38T0001266	TSS	ENSG00000187801.15	ZFP69B	protein_coding	0.9718	29809	146	719	0
ZH38T0040793	TSS	ENSG00000164609.10	SLU7	protein_coding	0.971795	79486	582	1725	0
ZH38T0018904	TSS	ENSG00000087237.12	CETP	protein_coding	0.971778	7782	116	110	0
ZH38T0003501	TSS	ENSG00000179914.5	ITLN1	protein_coding	0.971772	23960	56	640	0
ZH38T0022628	TSS	ENSG00000017797.13	RALBP1	protein_coding	0.971771	16145	24	445	0
ZH38T0031323	TSS	ENSG00000087460.25	GNAS	protein_coding	0.97175	43480	144	1120	0
ZH38T0025873	TSS	ENSG00000142549.9	IGLON5	protein_coding	0.971698	927	26	1	0
ZH38T0031863	TSS	ENSG00000185658.13	BRWD1	protein_coding	0.971684	7618	38	184	0
ZH38T0041801	TSS	ENSG00000182952.5	HMGN4	protein_coding	0.971683	77963	741	1531	0
ZH38T0050865	TSS	ENSG00000181090.21	EHMT1	protein_coding	0.971683	258591	7533	3	0
ZH38T0003319	TSS	ENSG00000163468.15	CCT3	protein_coding	0.971667	1459270	16299	26249	3
ZH38T0000518	TSS	ENSG00000117118.9	SDHB	protein_coding	0.971659	93564	2078	651	0
ZH38T0029526	TSS	ENSG00000168530.16	MYL1	protein_coding	0.971657	64554	676	1201	6
ZH38T0014056	TSS	ENSG00000151287.17	TEX30	protein_coding	0.971657	113268	276	3028	0
ZH38T0024953	TSS	ENSG00000130755.13	GMFG	protein_coding	0.971656	314322	1932	7230	7
ZH38T0009611	TSS	ENSG00000152558.15	TMEM123	protein_coding	0.971652	388688	2784	8556	0
ZH38T0034030	TSS	ENSG00000047849.21	MAP4	protein_coding	0.971639	586245	16671	417	24
ZH38T0026009	TSS	ENSG00000167608.11	TMC4	protein_coding	0.971628	8493	90	158	0
ZH38T0024239	TSS	ENSG00000186529.16	CYP4F3	protein_coding	0.971623	15819	282	180	0
ZH38T0002074	TSS	ENSG00000233593.10	LINC02609	lncRNA	0.971583	94161	1485	1269	0
ZH38T0021921	TSS	ENSG00000154262.13	ABCA6	protein_coding	0.971554	51778	470	1046	0
ZH38T0027856	TSS	ENSG00000239855.1	IGKV1-6	IG_V_gene	0.971531	4334	9	118	0
ZH38T0014275	TSS	ENSG00000129484.13	PARP2	protein_coding	0.971527	112086	1200	2085	0
ZH38T0032812	TSS	ENSG00000128346.10	C22orf23	protein_coding	0.971498	9544	44	236	0
ZH38T0000903	TSS	ENSG00000180198.16	RCC1	protein_coding	0.971497	11316	313	19	0
ZH38T0024417	TSS	ENSG00000064490.14	RFXANK	protein_coding	0.971465	18350	229	310	0
ZH38T0047404	TSS	ENSG00000253457.2	SMIM18	protein_coding	0.971446	10955	102	220	0
ZH38T0032205	TSS	ENSG00000093009.9	CDC45	protein_coding	0.971445	25515	276	474	0
ZH38T0004247	TSS	ENSG00000117153.16	KLHL12	protein_coding	0.971441	29899	522	357	0
ZH38T0008624	TSS	ENSG00000124942.14	AHNAK	protein_coding	0.971435	590510	8434	8928	2
ZH38T0004776	TSS	ENSG00000143801.17	PSEN2	protein_coding	0.971428	53854	1338	246	0
ZH38T0030896	TSS	ENSG00000101407.13	TTI1	protein_coding	0.971417	135534	878	3110	0
ZH38T0003218	TSS	ENSG00000143627.19	PKLR	protein_coding	0.97139	713	13	8	0
ZH38T0027768	TSS	ENSG00000168894.9	RNF181	protein_coding	0.971385	268994	4466	3458	0
ZH38T0003059	TSS	ENSG00000189171.14	S100A13	protein_coding	0.971382	26781	73	716	0
ZH38T0026430	TSS	ENSG00000134330.18	IAH1	protein_coding	0.97137	1425	12	30	0
ZH38T0017185	TSS	ENSG00000140374.16	ETFA	protein_coding	0.971358	432464	7140	5612	0
ZH38T0016691	TSS	ENSG00000260916.7	CCPG1	protein_coding	0.971357	437883	8574	4335	3
ZH38T0011846	TSS	ENSG00000182199.11	SHMT2	protein_coding	0.971353	86600	1954	600	0
ZH38T0038875	TSS	ENSG00000272323.1	AC026801.2	lncRNA	0.971339	2169	2	62	0
ZH38T0043965	TSS	ENSG00000131019.11	ULBP3	protein_coding	0.971331	3422	12	89	0
ZH38T0049447	TSS	ENSG00000283886.2	BX664615.2	lncRNA	0.971317	2235	52	9	5
ZH38T0040193	TSS	ENSG00000112983.17	BRD8	protein_coding	0.971298	361116	5817	4854	0
ZH38T0002039	TSS	ENSG00000065243.20	PKN2	protein_coding	0.971296	10862	167	153	1
ZH38T0022989	TSS	ENSG00000175387.16	SMAD2	protein_coding	0.971275	68978	1637	398	5
ZH38T0042671	TSS	ENSG00000124688.13	MAD2L1BP	protein_coding	0.971209	25907	213	555	0
ZH38T0036909	TSS	ENSG00000145247.11	OCIAD2	protein_coding	0.971142	250170	5007	2427	0
ZH38T0019471	TSS	ENSG00000131149.19	GSE1	protein_coding	0.971119	269	4	4	0
ZH38T0032020	TSS	ENSG00000160255.18	ITGB2	protein_coding	0.971111	437	2	11	0
ZH38T0041973	TSS	ENSG00000204592.9	HLA-E	protein_coding	0.971097	129691	265	3595	0
ZH38T0033049	TSS	ENSG00000100227.18	POLDIP3	protein_coding	0.971095	273470	6030	2110	0
ZH38T0052336	TSS	ENSG00000102243.13	VGLL1	protein_coding	0.971088	571	10	7	0
ZH38T0017820	TSS	ENSG00000198736.11	MSRB1	protein_coding	0.971066	29400	56	820	0
ZH38T0023213	TSS	ENSG00000166396.13	SERPINB7	protein_coding	0.971049	2415	25	47	0
ZH38T0052436	TSS	ENSG00000198930.13	CSAG1	protein_coding	0.971048	41154	1200	27	0
ZH38T0029816	TSS	ENSG00000135900.4	MRPL44	protein_coding	0.971025	68065	65	1966	0
ZH38T0031637	TSS	ENSG00000232079.7	LINC01697	lncRNA	0.971003	4755	5	137	0
ZH38T0029285	TSS	ENSG00000115524.16	SF3B1	protein_coding	0.971	1124538	15162	18405	18
ZH38T0025369	TSS	ENSG00000125741.4, ENSG00000177464.5	OPA3 , GPR4	protein_coding, protein_coding	0.970965	8026	86	154	0
ZH38T0002343	TSS	ENSG00000134202.10	GSTM3	protein_coding	0.970957	60512	272	1538	0
ZH38T0039981	TSS	ENSG00000196900.5	TEX43	protein_coding	0.970954	234	0	7	0
ZH38T0023631	TSS	ENSG00000105355.9	PLIN3	protein_coding	0.970936	66045	1164	813	0
ZH38T0039386	TSS	ENSG00000083312.17	TNPO1	protein_coding	0.970927	57508	902	820	0
ZH38T0024415	TSS	ENSG00000213999.17	MEF2B	protein_coding	0.970927	6412	44	148	0
ZH38T0020678	TSS	ENSG00000270647.6	TAF15	protein_coding	0.970911	344792	2307	8017	6
ZH38T0030267	TSS	ENSG00000088832.17, ENSG00000274322.1	FKBP1A , AL136531.2	protein_coding, protein_coding	0.970905	364699	2032	8893	4
ZH38T0003055	TSS	ENSG00000189334.9	S100A14	protein_coding	0.970883	131310	318	3620	0
ZH38T0048651	TSS	ENSG00000287325.1	AC138647.2	lncRNA	0.970856	533	0	16	0
ZH38T0021055	TSS	ENSG00000131462.8	TUBG1	protein_coding	0.970854	77347	954	1368	0
ZH38T0037183	TSS	ENSG00000174796.12	THAP6	protein_coding	0.970842	474260	4376	9868	0
ZH38T0027758	TSS	ENSG00000042493.16	CAPG	protein_coding	0.970818	69396	540	1546	0
ZH38T0026978	TSS	ENSG00000115828.17	QPCT	protein_coding	0.970818	78278	536	1816	1
ZH38T0036404	TSS	ENSG00000243449.6	C4orf48	protein_coding	0.970813	4324	6	124	0
ZH38T0026132	TSS	ENSG00000063241.8	ISOC2	protein_coding	0.970807	174124	3110	2126	0
ZH38T0042814	TSS	ENSG00000243955.6	GSTA1	protein_coding	0.970807	29397	644	239	1
ZH38T0019797	TSS	ENSG00000129219.14	PLD2	protein_coding	0.970801	54060	576	1050	0
ZH38T0047736	TSS	ENSG00000104388.15	RAB2A	protein_coding	0.970788	52674	1353	232	0
ZH38T0006962	TSS	ENSG00000150593.18	PDCD4	protein_coding	0.970773	257018	2292	5438	8
ZH38T0013735	TSS	ENSG00000250299.6, ENSG00000273784.4	MRPS31P4 , AL137058.2	transcribed_unprocessed_pseudogene, lncRNA	0.970771	4052	100	22	0
ZH38T0044027	TSS	ENSG00000112029.10	FBXO5	protein_coding	0.970769	21321	22	620	0
ZH38T0016072	TSS	ENSG00000114062.20	UBE3A	protein_coding	0.97076	1992	0	60	0
ZH38T0051895	TSS	ENSG00000174225.14	ARL13A	protein_coding	0.97076	166	4	1	0
ZH38T0040777	TSS	ENSG00000113312.11	TTC1	protein_coding	0.970734	437700	5628	7560	8
[truncated: 17,823 more rows]

## Sheet: Table S3C
Supplemental Table S3C. Verified TSSs of unnotated transcripts
rPeak ID	Genomic context	Linked genes (GENCODE ID)	Linked genes (Common name)	Gene class	% verified TSS reads	# reads map to GENCODE exon	# read map to novel transcript	# local transcription reads	# artifact reads
ZH38T0037837	Proximal	ENSG00000164056.11	SPRY1	protein_coding	1	15750	0	0	0
ZH38T0003755	Intron	ENSG00000117523.16	PRRC2C	protein_coding	1	6303	0	0	0
ZH38T0030251	Intron	ENSG00000125898.13	FAM110A	protein_coding	1	5455	0	0	0
ZH38T0008265	Intron	ENSG00000121653.11	MAPK8IP1	protein_coding	1	5298	0	0	0
ZH38T0037413	Intergenic	ENSG00000152583.12	SPARCL1	protein_coding	1	4509	0	0	0
ZH38T0009703	TSS	ENSG00000196167.10	COLCA1	lncRNA	1	3057	0	0	0
ZH38T0020349	Intron	ENSG00000166484.20	MAPK7	protein_coding	1	2772	0	0	0
ZH38T0021585	TSS	ENSG00000121057.13	AKAP1	protein_coding	1	2442	0	0	0
ZH38T0042418	Intron	ENSG00000096060.14	FKBP5	protein_coding	1	2274	0	0	0
ZH38T0033226	Intron	ENSG00000196576.15	PLXNB2	protein_coding	1	2150	0	0	0
ZH38T0024863	Proximal	ENSG00000011332.19	DPF1	protein_coding	1	2034	0	0	0
ZH38T0020613	Proximal	ENSG00000176749.9	CDK5R1	protein_coding	1	1587	0	0	0
ZH38T0048659	Proximal	ENSG00000234616.8	JRK	protein_coding	1	1420	0	0	0
ZH38T0017774	Proximal	ENSG00000197253.13	TPSB2	protein_coding	1	1412	0	0	0
ZH38T0007599	Intron	ENSG00000167244.21	IGF2	protein_coding	1	1372	0	0	0
ZH38T0023672	Intron	ENSG00000171124.13	FUT3	protein_coding	1	964	0	0	0
ZH38T0001111	Intron	ENSG00000054118.15	THRAP3	protein_coding	1	957	0	0	0
ZH38T0025705	Exon	ENSG00000224420.3	ADM5	protein_coding	1	932	0	0	0
ZH38T0034854	Intergenic	ENSG00000091986.15	CCDC80	protein_coding	1	779	0	0	0
ZH38T0031021	Proximal	ENSG00000124157.6	SEMG2	protein_coding	1	752	0	0	0
ZH38T0044445	Intron	ENSG00000205903.7	ZNF316	protein_coding	1	746	0	0	0
ZH38T0042346	Intron	ENSG00000096433.11	ITPR3	protein_coding	1	660	0	0	0
ZH38T0031236	Proximal	ENSG00000171940.13	ZNF217	protein_coding	1	646	0	0	0
ZH38T0017371	Intron	ENSG00000136383.6	ALPK3	protein_coding	1	549	0	0	0
ZH38T0021580	Proximal	ENSG00000121058.5	COIL	protein_coding	1	524	0	0	0
ZH38T0049466	Proximal	ENSG00000275239.4	FAM242F	lncRNA	1	510	0	0	0
ZH38T0051193	Proximal	ENSG00000184368.16	MAP7D2	protein_coding	1	480	0	0	0
ZH38T0052305	Proximal	ENSG00000228372.8	SMIM10L2B-AS1	lncRNA	1	460	0	0	0
ZH38T0002135	Intron	ENSG00000067334.14	DNTTIP2	protein_coding	1	445	0	0	0
ZH38T0042657	Intron	ENSG00000146216.13	TTBK1	protein_coding	1	414	0	0	0
ZH38T0024235	Intergenic	ENSG00000161031.13	PGLYRP2	protein_coding	1	402	0	0	0
ZH38T0000441	Intron	ENSG00000237301.1	AL121992.1	lncRNA	1	395	0	0	0
ZH38T0048813	Intron	ENSG00000160949.17	TONSL	protein_coding	1	374	0	0	0
ZH38T0031345	Intron	ENSG00000124203.6	ZNF831	protein_coding	1	370	0	0	0
ZH38T0024123	Proximal	ENSG00000179284.5	DAND5	protein_coding	1	369	0	0	0
ZH38T0018747	Proximal	ENSG00000260854.1	LINC02184	lncRNA	1	362	0	0	0
ZH38T0038737	TSS	ENSG00000250448.1	AC092335.1	lncRNA	1	357	0	0	0
ZH38T0005753	Intron	ENSG00000150201.15	FXYD4	protein_coding	1	346	0	0	0
ZH38T0031994	Intron	ENSG00000142185.16	TRPM2	protein_coding	1	324	0	0	0
ZH38T0015891	Intergenic	ENSG00000211892.4	IGHG4	IG_C_gene	1	323	0	0	0
ZH38T0008537	Proximal	ENSG00000229183.8, ENSG00000256713.7	PGA4 , PGA5	protein_coding, protein_coding	1	306	0	0	0
ZH38T0033541	Intron	ENSG00000131378.14	RFTN1	protein_coding	1	302	0	0	0
ZH38T0033851	Proximal	ENSG00000187094.11	CCK	protein_coding	1	296	0	0	0
ZH38T0028147	Proximal	ENSG00000119147.10	C2orf40	protein_coding	1	284	0	0	0
ZH38T0046140	Intron	ENSG00000287592.1	AC073348.2	lncRNA	1	275	0	0	0
ZH38T0032107	Intron	ENSG00000160299.17	PCNT	protein_coding	1	252	0	0	0
ZH38T0052138	Intron	ENSG00000230392.1	AC004835.1	lncRNA	1	235	0	0	0
ZH38T0018604	Intergenic	ENSG00000180209.11	MYLPF	protein_coding	1	188	0	0	0
ZH38T0048824	Intron	ENSG00000160972.9	PPP1R16A	protein_coding	1	157	0	0	0
ZH38T0032181	Proximal	ENSG00000274252.1	GGTLC3	protein_coding	1	116	0	0	0
ZH38T0035078	Intergenic	ENSG00000173702.7	MUC13	protein_coding	1	104	0	0	0
ZH38T0015621	Exon	ENSG00000196136.17, ENSG00000273259.3	SERPINA3 , AL049839.2	protein_coding, protein_coding	1	10	0	0	0
ZH38T0030481	Exon	ENSG00000125844.15	RRBP1	protein_coding	1	5	0	0	0
ZH38T0023427	Proximal	ENSG00000115268.9	RPS15	protein_coding	0.999902	132856	11	2	0
ZH38T0029918	Proximal	ENSG00000156966.7	B3GNT7	protein_coding	0.999851	13430	0	2	0
ZH38T0041008	Proximal	ENSG00000169258.7	GPRIN1	protein_coding	0.99977	4349	1	0	0
ZH38T0024114	Intron	ENSG00000179218.13	CALR	protein_coding	0.99976	8336	0	2	0
ZH38T0032913	Exon	ENSG00000128272.14	ATF4	protein_coding	0.999743	34965	3	6	0
ZH38T0024356	Proximal	ENSG00000105647.17, ENSG00000268173.3	PIK3R2 , AC007192.1	protein_coding, protein_coding	0.999737	60842	2	14	0
ZH38T0047193	Intron	ENSG00000168490.14	PHYHIP	protein_coding	0.99973	7410	0	2	0
ZH38T0030820	Proximal	ENSG00000171222.10	SCAND1	protein_coding	0.999645	39372	0	14	0
ZH38T0047579	Proximal	ENSG00000131931.8	THAP1	protein_coding	0.999594	14760	6	0	0
ZH38T0033106	Proximal	ENSG00000188636.4	RTL6	protein_coding	0.999591	17105	1	6	0
ZH38T0048777	Proximal	ENSG00000178719.17	GRINA	protein_coding	0.999584	4810	2	0	0
ZH38T0002696	Proximal	ENSG00000287978.1	AC245407.2	lncRNA	0.999571	4660	0	2	0
ZH38T0030352	Proximal	ENSG00000171867.16	PRNP	protein_coding	0.999568	199086	70	16	0
ZH38T0014968	Proximal	ENSG00000139971.15	ARMH4	protein_coding	0.999543	2189	0	0	1
ZH38T0000183	Intron	ENSG00000116251.11, ENSG00000116254.18, ENSG00000285629.1	RPL22 , CHD5 , AL031847.2	protein_coding, protein_coding, protein_coding	0.999511	6135	2	1	0
ZH38T0032343	Proximal	ENSG00000211664.3, ENSG00000211677.2, ENSG00000211679.2, ENSG00000253152.1, ENSG00000254709.7	IGLV2-18 , IGLC2 , IGLC3 , IGLV3-17 , IGLL5	IG_V_gene, IG_C_gene, IG_C_gene, IG_V_pseudogene, protein_coding	0.999476	1909	0	1	0
ZH38T0030574	Proximal	ENSG00000125812.16	GZF1	protein_coding	0.999351	1539	0	1	0
ZH38T0010468	Proximal	ENSG00000111640.15	GAPDH	protein_coding	0.999266	103526	8	66	2
ZH38T0047295	Intron	ENSG00000221914.11	PPP2R2A	protein_coding	0.999126	4572	0	4	0
ZH38T0000179	Proximal	ENSG00000116251.11	RPL22	protein_coding	0.999092	8804	2	6	0
ZH38T0001037	Intron	ENSG00000121900.19	TMEM54	protein_coding	0.99906	4250	0	4	0
ZH38T0001024	Proximal	ENSG00000162520.14	SYNC	protein_coding	0.999055	6340	6	0	0
ZH38T0052418	Proximal	ENSG00000029993.15	HMGB3	protein_coding	0.998983	13746	12	2	0
ZH38T0015813	Proximal	ENSG00000166170.9	BAG5	protein_coding	0.998943	518793	210	339	0
ZH38T0031056	Intron	ENSG00000101470.10	TNNC2	protein_coding	0.998921	14812	2	14	0
ZH38T0018609	Intron	ENSG00000180209.11	MYLPF	protein_coding	0.998853	871	0	1	0
ZH38T0032360	TSS	ENSG00000211677.2, ENSG00000211679.2, ENSG00000222037.5	IGLC2 , IGLC3 , IGLC6	IG_C_gene, IG_C_gene, IG_C_pseudogene	0.998824	4248	0	5	0
ZH38T0024198	Proximal	ENSG00000132002.8	DNAJB1	protein_coding	0.998808	2514	0	3	0
ZH38T0015802	Intron	ENSG00000166165.13	CKB	protein_coding	0.998797	9966	0	12	0
ZH38T0017877	Proximal	ENSG00000185883.12, ENSG00000259784.1	ATP6V0C , AC093525.1	protein_coding, protein_coding	0.99877	25980	16	16	0
ZH38T0022410	Proximal	ENSG00000169750.9	RAC3	protein_coding	0.998684	4552	4	2	0
ZH38T0026127	Proximal	ENSG00000108107.14	RPL28	protein_coding	0.998643	468833	20	617	0
ZH38T0003061	Proximal	ENSG00000160678.11	S100A1	protein_coding	0.998616	6492	0	9	0
ZH38T0042369	Proximal	ENSG00000124614.16, ENSG00000270800.3	RPS10 , RPS10-NUDT3	protein_coding, protein_coding	0.998597	222136	64	248	0
ZH38T0008635	Intron	ENSG00000255508.7	AP002990.1	protein_coding	0.998577	2105	3	0	0
ZH38T0051945	Intron	ENSG00000182916.8	TCEAL7	protein_coding	0.998575	1402	0	2	0
ZH38T0044548	Proximal	ENSG00000171243.8	SOSTDC1	protein_coding	0.998563	2779	0	4	0
ZH38T0014822	Proximal	ENSG00000165527.7	ARF6	protein_coding	0.998536	3410	4	0	1
ZH38T0010681	Intron	ENSG00000214776.12	AC092821.1	transcribed_unprocessed_pseudogene	0.99845	3866	0	6	0
ZH38T0010954	Intron	ENSG00000111716.12, ENSG00000285854.1	LDHB , AC010197.2	protein_coding, protein_coding	0.998446	7708	12	0	0
ZH38T0000661	Proximal	ENSG00000159189.12	C1QC	protein_coding	0.998296	26361	0	45	0
ZH38T0052581	Proximal	ENSG00000196976.7	LAGE3	protein_coding	0.998293	8773	0	15	0
ZH38T0038166	Intron	ENSG00000109654.15	TRIM2	protein_coding	0.998255	6864	3	9	0
ZH38T0042698	Proximal	ENSG00000180992.7	MRPL14	protein_coding	0.998253	2286	2	2	0
ZH38T0011315	Proximal	ENSG00000167552.14	TUBA1A	protein_coding	0.998245	25022	0	44	0
ZH38T0005557	Intron	ENSG00000150051.14	MKX	protein_coding	0.998239	5103	6	3	0
ZH38T0024112	Proximal	ENSG00000179218.13	CALR	protein_coding	0.998195	24338	15	29	0
ZH38T0015623	Intergenic	ENSG00000197249.13	SERPINA1	protein_coding	0.998158	1084	2	0	0
ZH38T0026124	Intron	ENSG00000160472.5	TMEM190	protein_coding	0.998145	538	0	1	0
ZH38T0022404	Proximal	ENSG00000184009.12	ACTG1	protein_coding	0.998122	2126	3	1	0
ZH38T0030353	Proximal	ENSG00000171867.16	PRNP	protein_coding	0.998117	4240	2	6	0
ZH38T0031922	Intron	ENSG00000160180.15	TFF3	protein_coding	0.998107	19509	0	37	0
ZH38T0018844	Proximal	ENSG00000245694.10	CRNDE	lncRNA	0.998032	10144	4	16	0
ZH38T0041972	Proximal	ENSG00000241370.5	RPP21	protein_coding	0.998007	12020	20	4	0
ZH38T0016446	Proximal	ENSG00000167004.13	PDIA3	protein_coding	0.998001	1498	0	3	0
ZH38T0043761	Intron	ENSG00000135525.18	MAP7	protein_coding	0.998	4491	0	9	0
ZH38T0005750	Proximal	ENSG00000169826.8	CSGALNACT2	protein_coding	0.997992	10932	18	4	0
ZH38T0024381	Proximal	ENSG00000130511.16	SSBP4	protein_coding	0.997989	4467	1	8	0
ZH38T0031058	Intron	ENSG00000101470.10	TNNC2	protein_coding	0.997942	970	0	2	0
ZH38T0018653	Proximal	ENSG00000156860.15	FBRS	protein_coding	0.99793	1446	0	3	0
ZH38T0032336	Proximal	ENSG00000211660.3, ENSG00000211664.3, ENSG00000211666.2, ENSG00000211668.2, ENSG00000211677.2, ENSG00000211679.2, ENSG00000253451.1, ENSG00000254709.7	IGLV2-23 , IGLV2-18 , IGLV2-14 , IGLV2-11 , IGLC2 , IGLC3 , IGLV2-28 , IGLL5	IG_V_gene, IG_V_gene, IG_V_gene, IG_V_gene, IG_C_gene, IG_C_gene, IG_V_pseudogene, protein_coding	0.997912	478	1	0	0
ZH38T0037085	Intergenic	ENSG00000171209.3	CSN3	protein_coding	0.997895	474	0	1	0
ZH38T0020492	Proximal	ENSG00000198242.14	RPL23A	protein_coding	0.997892	119268	162	90	0
ZH38T0013565	Proximal	ENSG00000133112.16	TPT1	protein_coding	0.997873	551670	60	1116	0
ZH38T0026373	Proximal	ENSG00000171863.15	RPS7	protein_coding	0.997872	129450	120	156	0
ZH38T0041335	Intron	ENSG00000153046.18	CDYL	protein_coding	0.997817	914	0	2	0
ZH38T0008315	Proximal	ENSG00000110514.19	MADD	protein_coding	0.997779	12132	9	18	0
ZH38T0014801	Proximal	ENSG00000165502.6	RPL36AL	protein_coding	0.997765	578648	159	1137	0
ZH38T0030141	Intron	ENSG00000130294.16	KIF1A	protein_coding	0.997758	5340	0	12	0
ZH38T0021344	Proximal	ENSG00000260027.4	HOXB7	protein_coding	0.997688	41861	1	96	0
ZH38T0030583	Proximal	ENSG00000101439.9	CST3	protein_coding	0.99765	78130	51	133	0
ZH38T0032282	Intergenic	ENSG00000169635.10	HIC2	protein_coding	0.997613	418	1	0	0
ZH38T0016017	Intron	ENSG00000276550.4	HERC2P2	transcribed_unprocessed_pseudogene	0.997582	1650	0	4	0
ZH38T0000097	Intron	ENSG00000169885.10	CALML6	protein_coding	0.997489	1986	2	3	0
ZH38T0026372	Proximal	ENSG00000171863.15	RPS7	protein_coding	0.997234	8652	6	18	0
ZH38T0023449	Intron	ENSG00000133275.16	CSNK1G2	protein_coding	0.997218	717	0	2	0
ZH38T0051097	Intron	ENSG00000198759.12	EGFL6	protein_coding	0.997214	716	0	2	0
ZH38T0008920	Proximal	ENSG00000173039.19	RELA	protein_coding	0.997076	1705	5	0	0
ZH38T0004382	Proximal	ENSG00000069275.13	NUCKS1	protein_coding	0.997008	11995	9	27	0
ZH38T0045392	Proximal	ENSG00000106211.9	HSPB1	protein_coding	0.996941	20204	0	62	0
ZH38T0018683	Proximal	ENSG00000099364.16	FBXL19	protein_coding	0.996936	3904	0	12	0
ZH38T0012836	Proximal	ENSG00000089157.16	RPLP0	protein_coding	0.996902	50200	0	156	0
ZH38T0028748	Proximal	ENSG00000224152.1	AC009506.1	lncRNA	0.996859	2856	0	9	0
ZH38T0052028	Proximal	ENSG00000080561.13	MID2	protein_coding	0.996844	3790	0	12	0
ZH38T0028585	Proximal	ENSG00000287115.1	AC009951.3	lncRNA	0.996832	2517	4	4	0
ZH38T0000176	Proximal	ENSG00000116254.18	CHD5	protein_coding	0.996822	19758	35	28	0
ZH38T0024999	Intron	ENSG00000275395.6	FCGBP	protein_coding	0.99682	2508	2	6	0
ZH38T0019094	Proximal	ENSG00000159723.4	AGRP	protein_coding	0.996819	940	0	3	0
ZH38T0008954	Proximal	ENSG00000175550.8	DRAP1	protein_coding	0.996816	37887	4	117	0
ZH38T0047329	Proximal	ENSG00000120885.21	CLU	protein_coding	0.996803	49886	60	100	0
ZH38T0015622	Intergenic	ENSG00000197249.13	SERPINA1	protein_coding	0.996785	310	1	0	0
ZH38T0010467	Proximal	ENSG00000111640.15	GAPDH	protein_coding	0.996757	159510	12	507	0
ZH38T0010019	Intergenic	ENSG00000137699.17	TRIM29	protein_coding	0.996711	303	0	1	0
ZH38T0043806	Proximal	ENSG00000051620.11	HEBP2	protein_coding	0.996657	116289	240	150	0
ZH38T0007380	Proximal	ENSG00000177600.9	RPLP2	protein_coding	0.996614	46208	54	103	0
ZH38T0029454	Proximal	ENSG00000114933.16	INO80D	protein_coding	0.996589	4383	9	6	0
ZH38T0044433	Proximal	ENSG00000136238.18	RAC1	protein_coding	0.996573	6980	24	0	0
ZH38T0050024	Proximal	ENSG00000066697.14	MSANTD3	protein_coding	0.996571	47082	162	0	0
ZH38T0049242	Intron	ENSG00000165006.14	UBAP1	protein_coding	0.996552	3468	0	12	0
ZH38T0016923	Intron	ENSG00000074621.14	SLC24A1	protein_coding	0.996549	6930	0	24	0
ZH38T0037094	Intron	ENSG00000132465.11	JCHAIN	protein_coding	0.99654	288	0	1	0
ZH38T0032078	Proximal	ENSG00000142173.15	COL6A2	protein_coding	0.996495	1706	1	5	0
ZH38T0023065	Intron	ENSG00000178690.3	DYNAP	protein_coding	0.996386	2481	0	9	0
ZH38T0035946	Intergenic	ENSG00000078081.8	LAMP3	protein_coding	0.996377	825	3	0	0
ZH38T0011518	Proximal	ENSG00000167779.9	IGFBP6	protein_coding	0.996356	27340	44	56	0
ZH38T0018957	Intron	ENSG00000070761.8	CFAP20	protein_coding	0.996314	1892	0	7	0
ZH38T0050529	Proximal	ENSG00000119335.16	SET	protein_coding	0.996269	52334	128	68	0
ZH38T0008379	Intergenic	ENSG00000214872.8	SMTNL1	protein_coding	0.996206	18379	13	57	0
ZH38T0031057	Intron	ENSG00000101470.10	TNNC2	protein_coding	0.996205	1050	0	4	0
ZH38T0022354	Proximal	ENSG00000184009.12	ACTG1	protein_coding	0.996148	466063	80	1722	0
ZH38T0027741	Proximal	ENSG00000034510.6	TMSB10	protein_coding	0.996133	36324	1	140	0
ZH38T0032508	TSS	ENSG00000100285.9	NEFH	protein_coding	0.996068	6333	16	9	0
ZH38T0020764	Proximal	ENSG00000125691.13	RPL23	protein_coding	0.996041	165024	7	649	0
ZH38T0031062	Proximal	ENSG00000101470.10	TNNC2	protein_coding	0.996025	2506	0	10	0
ZH38T0023010	Proximal	ENSG00000215472.10, ENSG00000265681.7	RPL17-C18orf32 , RPL17	protein_coding, protein_coding	0.995907	816420	539	2816	0
ZH38T0027895	Proximal	ENSG00000230572.5	AC027612.2	transcribed_unprocessed_pseudogene	0.995885	242	0	1	0
ZH38T0043666	Intron	ENSG00000079819.19	EPB41L2	protein_coding	0.995878	25128	0	104	0
ZH38T0030291	Intron	ENSG00000149488.13	TMC2	protein_coding	0.995868	723	2	1	0
ZH38T0043173	Intron	ENSG00000112159.12	MDN1	protein_coding	0.995833	956	0	4	0
ZH38T0024256	Proximal	ENSG00000167460.17	TPM4	protein_coding	0.995827	15033	18	45	0
ZH38T0021605	Intergenic	ENSG00000181610.13	MRPS23	protein_coding	0.995802	7116	30	0	0
ZH38T0020269	Proximal	ENSG00000133027.18	PEMT	protein_coding	0.995759	1174	1	4	0
ZH38T0032413	Proximal	ENSG00000128271.22	ADORA2A	protein_coding	0.995739	1402	6	0	0
ZH38T0017606	Exon	ENSG00000185551.15	NR2F2	protein_coding	0.995684	1615	2	5	0
ZH38T0014439	Intergenic	ENSG00000197616.12	MYH6	protein_coding	0.995652	229	0	1	0
ZH38T0051884	Intron	ENSG00000000005.6	TNMD	protein_coding	0.995646	686	1	2	0
ZH38T0042480	Intron	ENSG00000137168.8	PPIL1	protein_coding	0.995602	7018	2	29	0
ZH38T0012989	Proximal	ENSG00000111328.7	CDK2AP1	protein_coding	0.995584	4734	21	0	0
ZH38T0009491	Intron	ENSG00000077616.11	NAALAD2	protein_coding	0.995575	675	0	3	0
ZH38T0020848	Proximal	ENSG00000126351.12	THRA	protein_coding	0.995568	7188	28	4	0
ZH38T0022967	Proximal	ENSG00000152234.16	ATP5F1A	protein_coding	0.995542	8710	39	0	0
ZH38T0043227	Intron	ENSG00000132424.16	PNISR	protein_coding	0.995484	7935	0	36	0
ZH38T0000743	Proximal	ENSG00000117602.12	RCAN3	protein_coding	0.995473	12095	55	0	0
ZH38T0017044	Proximal	ENSG00000066933.16	MYO9A	protein_coding	0.995458	32875	145	5	0
ZH38T0026070	Intron	ENSG00000125503.13	PPP1R12C	protein_coding	0.995444	17478	2	78	0
ZH38T0031751	Proximal	ENSG00000198743.7, ENSG00000243927.6, ENSG00000272657.1	SLC5A3 , MRPS6 , AP000317.2	protein_coding, protein_coding, lncRNA	0.995437	15054	3	66	0
ZH38T0008397	Proximal	ENSG00000156603.18	MED19	protein_coding	0.995397	13840	16	48	0
ZH38T0024010	Intron	ENSG00000130176.8	CNN1	protein_coding	0.995392	1296	0	6	0
ZH38T0019982	Proximal	ENSG00000170175.11	CHRNB1	protein_coding	0.995368	5157	1	23	0
ZH38T0043909	Proximal	ENSG00000146414.16	SHPRH	protein_coding	0.995349	6420	15	15	0
ZH38T0015550	Intron	ENSG00000100599.16	RIN3	protein_coding	0.99534	2136	0	10	0
ZH38T0038838	Intron	ENSG00000113387.12	SUB1	protein_coding	0.995238	418	0	2	0
ZH38T0017889	Proximal	ENSG00000167978.17	SRRM2	protein_coding	0.995199	5390	22	4	0
ZH38T0052574	Proximal	ENSG00000071859.15	FAM50A	protein_coding	0.995181	19205	22	71	0
ZH38T0020119	Intron	ENSG00000133026.12	MYH10	protein_coding	0.995149	4308	21	0	0
ZH38T0037119	Proximal	ENSG00000145321.13	GC	protein_coding	0.995122	612	3	0	0
ZH38T0022535	Proximal	ENSG00000118680.13	MYL12B	protein_coding	0.995041	2534465	7565	5065	0
ZH38T0023406	Proximal	ENSG00000099624.8	ATP5F1D	protein_coding	0.995032	6609	3	30	0
ZH38T0003753	Intron	ENSG00000117523.16	PRRC2C	protein_coding	0.995028	4803	0	24	0
ZH38T0052312	Proximal	ENSG00000268940.5	CT45A1	protein_coding	0.995025	200	0	1	0
ZH38T0047622	Proximal	ENSG00000104738.18	MCM4	protein_coding	0.995014	4191	0	21	0
ZH38T0018664	Intron	ENSG00000080603.17, ENSG00000282034.1	SRCAP , AC106886.5	protein_coding, protein_coding	0.99497	30264	6	147	0
ZH38T0051577	Proximal	ENSG00000158526.8	TSR2	protein_coding	0.994969	2769	3	11	0
ZH38T0031686	Proximal	ENSG00000142168.14	SOD1	protein_coding	0.994947	5513	10	18	0
ZH38T0020823	Proximal	ENSG00000141741.12	MIEN1	protein_coding	0.994941	19274	74	24	0
ZH38T0033850	Proximal	ENSG00000187094.11	CCK	protein_coding	0.994911	2346	2	10	0
ZH38T0037255	Proximal	ENSG00000156234.7	CXCL13	protein_coding	0.994868	2520	13	0	0
ZH38T0039413	Intron	ENSG00000164346.10	NSA2	protein_coding	0.994723	1508	0	8	0
ZH38T0024694	Intron	ENSG00000105675.8	ATP4A	protein_coding	0.9947	563	0	3	0
ZH38T0025278	Intron	ENSG00000216588.9	IGSF23	protein_coding	0.994652	186	0	1	0
ZH38T0025180	Intron	ENSG00000079432.7	CIC	protein_coding	0.994635	4264	1	22	0
ZH38T0039156	Proximal	ENSG00000062194.16	GPBP1	protein_coding	0.994609	76929	18	399	0
ZH38T0003017	Intergenic	ENSG00000244094.2	SPRR2F	protein_coding	0.994518	1814	3	7	0
ZH38T0024391	Proximal	ENSG00000221983.7	UBA52	protein_coding	0.994514	58008	190	130	0
ZH38T0004741	Intron	ENSG00000143819.12	EPHX1	protein_coding	0.994493	1806	2	8	0
ZH38T0010067	Proximal	ENSG00000109944.10	JHY	protein_coding	0.994434	21440	40	80	0
ZH38T0020270	Intron	ENSG00000133027.18	PEMT	protein_coding	0.994406	3555	5	15	0
ZH38T0007747	Intron	ENSG00000166444.19	ST5	protein_coding	0.994389	78155	105	336	0
ZH38T0032822	Intron	ENSG00000128298.17	BAIAP2L2	protein_coding	0.994331	5964	6	28	0
ZH38T0028452	Intron	ENSG00000075886.11	TUBA3D	protein_coding	0.994318	175	0	1	0
ZH38T0006839	Intron	ENSG00000148843.15	PDCD11	protein_coding	0.994286	348	0	2	0
ZH38T0018335	Intron	ENSG00000158486.13	DNAH3	protein_coding	0.994286	174	0	1	0
ZH38T0033383	Intron	ENSG00000125037.12	EMC3	protein_coding	0.99425	19022	84	26	0
ZH38T0033197	Proximal	ENSG00000100426.7	ZBED4	protein_coding	0.994228	7751	39	5	1
ZH38T0023965	Intron	ENSG00000127616.18	SMARCA4	protein_coding	0.99419	24642	72	72	0
ZH38T0000762	Proximal	ENSG00000117616.18	RSRP1	protein_coding	0.994188	4790	12	16	0
ZH38T0005323	Intron	ENSG00000151465.14	CDC123	protein_coding	0.994172	2388	4	10	0
ZH38T0025589	Proximal	ENSG00000104805.16	NUCB1	protein_coding	0.994152	4080	6	18	0
ZH38T0041152	Proximal	ENSG00000161013.17	MGAT4B	protein_coding	0.994099	3369	4	16	0
ZH38T0000916	Intron	ENSG00000198492.16	YTHDF2	protein_coding	0.994037	5001	3	27	0
ZH38T0020729	Intron	ENSG00000278053.5	DDX52	protein_coding	0.99403	333	0	2	0
ZH38T0018803	Proximal	ENSG00000083799.17	CYLD	protein_coding	0.993976	10395	0	63	0
ZH38T0050386	Proximal	ENSG00000136942.15	RPL35	protein_coding	0.993973	93513	9	558	0
ZH38T0052497	Intron	ENSG00000007350.17	TKTL1	protein_coding	0.993939	984	2	4	0
ZH38T0031237	Intergenic	ENSG00000171940.13	ZNF217	protein_coding	0.993921	654	0	4	0
ZH38T0018571	Proximal	ENSG00000149925.20	ALDOA	protein_coding	0.993904	110218	280	396	0
ZH38T0023972	Intron	ENSG00000197256.10	KANK2	protein_coding	0.99389	976	0	6	0
ZH38T0052080	Intron	ENSG00000126016.15	AMOT	protein_coding	0.993876	8115	10	40	0
ZH38T0003355	Intron	ENSG00000143321.19	HDGF	protein_coding	0.993852	8567	0	53	0
ZH38T0041100	Intergenic	ENSG00000113240.13	CLK4	protein_coding	0.993827	483	0	3	0
ZH38T0032235	Proximal	ENSG00000099899.15	TRMT2A	protein_coding	0.993769	12760	48	32	0
ZH38T0034237	Proximal	ENSG00000162244.11	RPL29	protein_coding	0.993748	11763	7	67	0
ZH38T0027130	Exon	ENSG00000250565.7	ATP6V1E2	protein_coding	0.993721	633	0	4	0
ZH38T0013215	Proximal	ENSG00000151835.16	SACS	protein_coding	0.993675	11940	70	6	0
ZH38T0042231	Intron	ENSG00000198502.6	HLA-DRB5	protein_coding	0.993671	157	0	1	0
ZH38T0011376	Proximal	ENSG00000123268.9	ATF1	protein_coding	0.993654	4854	28	3	0
ZH38T0042105	Proximal	ENSG00000204472.13	AIF1	protein_coding	0.993631	10296	0	66	0
ZH38T0036282	Proximal	ENSG00000228109.1	MELTF-AS1	lncRNA	0.993631	468	0	3	0
ZH38T0051705	Proximal	ENSG00000169562.11	GJB1	protein_coding	0.993631	156	0	1	0
ZH38T0034563	Intron	ENSG00000228868.3	MYLKP1	unprocessed_pseudogene	0.99359	155	1	0	0
ZH38T0003360	Proximal	ENSG00000143321.19	HDGF	protein_coding	0.993574	126172	520	296	0
ZH38T0048902	Proximal	ENSG00000080503.24	SMARCA2	protein_coding	0.993565	16212	14	91	0
ZH38T0007073	Exon	ENSG00000170370.12	EMX2	protein_coding	0.993556	4934	14	18	0
ZH38T0014375	Proximal	ENSG00000155465.18	SLC7A7	protein_coding	0.993546	22782	84	64	0
ZH38T0013429	Proximal	ENSG00000120693.13	SMAD9	protein_coding	0.993538	16912	110	0	0
ZH38T0041085	Proximal	ENSG00000145911.6	N4BP3	protein_coding	0.993488	4424	24	5	0
ZH38T0022194	Proximal	ENSG00000184640.18	2021-09-09	protein_coding	0.99345	267854	716	1050	0
ZH38T0013559	Intron	ENSG00000188342.12	GTF2F2	protein_coding	0.993414	4374	15	14	0
ZH38T0003178	Intron	ENSG00000143590.14, ENSG00000251246.1	EFNA3 , AL691442.1	protein_coding, protein_coding	0.993413	3318	0	22	0
ZH38T0044744	Intron	ENSG00000122592.8	HOXA7	protein_coding	0.993407	452	0	3	0
ZH38T0009290	Proximal	ENSG00000149273.15	RPS3	protein_coding	0.993369	159702	216	850	0
ZH38T0048141	Proximal	ENSG00000169439.12	SDC2	protein_coding	0.993314	16491	27	84	0
ZH38T0016481	Proximal	ENSG00000104131.13	EIF3J	protein_coding	0.993297	16005	102	6	0
ZH38T0037081	Intergenic	ENSG00000109205.16	ODAM	protein_coding	0.993281	887	6	0	0
ZH38T0023298	Proximal	ENSG00000101493.11	ZNF516	protein_coding	0.993276	4136	26	2	0
ZH38T0044288	Proximal	ENSG00000188191.15	PRKAR1B	protein_coding	0.993227	23316	159	0	0
ZH38T0029283	Proximal	ENSG00000115524.16	SF3B1	protein_coding	0.99321	4388	4	26	0
ZH38T0036382	Proximal	ENSG00000163950.13	SLBP	protein_coding	0.993165	16566	88	26	0
ZH38T0022421	Proximal	ENSG00000169727.12	GPS1	protein_coding	0.993147	12319	35	50	0
ZH38T0036389	Intron	ENSG00000168924.15	LETM1	protein_coding	0.993134	2893	0	20	0
ZH38T0022834	Proximal	ENSG00000118271.10	TTR	protein_coding	0.993092	107385	468	279	0
ZH38T0012867	Proximal	ENSG00000088986.11	DYNLL1	protein_coding	0.993078	125392	0	874	0
ZH38T0033493	Proximal	ENSG00000225733.6	FGD5-AS1	lncRNA	0.993068	27220	26	164	0
ZH38T0023970	Intron	ENSG00000197256.10	KANK2	protein_coding	0.993056	2002	0	14	0
ZH38T0045374	Proximal	ENSG00000006606.8	CCL26	protein_coding	0.992958	282	0	2	0
ZH38T0052212	Intron	ENSG00000183918.16	SH2D1A	protein_coding	0.992951	986	0	7	0
ZH38T0004922	Intron	ENSG00000054267.22	ARID4B	protein_coding	0.992936	2952	0	21	0
ZH38T0018607	Intron	ENSG00000180209.11	MYLPF	protein_coding	0.992915	981	0	7	0
ZH38T0050378	Intron	ENSG00000136931.10	NR5A1	protein_coding	0.992891	838	6	0	0
ZH38T0044097	Intron	ENSG00000092820.18	EZR	protein_coding	0.992878	63990	36	423	0
ZH38T0047469	Proximal	ENSG00000187840.5	EIF4EBP1	protein_coding	0.992837	3188	15	8	0
ZH38T0028819	Intron	ENSG00000236283.5	AC019197.1	lncRNA	0.992836	3326	10	14	0
ZH38T0008751	Proximal	ENSG00000173486.13, ENSG00000286264.1	FKBP2 , AP001453.5	protein_coding, protein_coding	0.992821	61404	156	288	0
ZH38T0010500	Proximal	ENSG00000159335.16	PTMS	protein_coding	0.992803	54210	240	153	0
ZH38T0013712	Proximal	ENSG00000123171.6	CCDC70	protein_coding	0.992718	818	0	6	0
ZH38T0018641	Exon	ENSG00000156853.12	ZNF689	protein_coding	0.992718	818	1	5	0
ZH38T0010311	Intron	ENSG00000002016.17	RAD52	protein_coding	0.99271	1634	0	12	0
ZH38T0002148	Intron	ENSG00000226835.3	AC097059.1	lncRNA	0.992701	1632	4	8	0
ZH38T0007968	TSS	ENSG00000173432.12	SAA1	protein_coding	0.992682	1899	0	14	0
ZH38T0048214	Proximal	ENSG00000164924.18	YWHAZ	protein_coding	0.992673	52840	390	0	0
ZH38T0004544	Proximal	ENSG00000117691.10	NENF	protein_coding	0.992673	4742	31	4	0
ZH38T0029355	Intron	ENSG00000013441.16, ENSG00000240344.9	CLK1 , PPIL3	protein_coding, protein_coding	0.992647	1620	4	8	0
ZH38T0034147	Intron	ENSG00000004534.15	RBM6	protein_coding	0.992645	13496	4	96	0
ZH38T0007381	Proximal	ENSG00000177600.9	RPLP2	protein_coding	0.992572	34741	33	227	0
ZH38T0006285	Intron	ENSG00000108175.17	ZMIZ1	protein_coding	0.99252	3450	16	10	0
ZH38T0033079	Proximal	ENSG00000186732.14	MPPED1	protein_coding	0.992509	10334	78	0	0
ZH38T0043312	Intron	ENSG00000025796.14	SEC63	protein_coding	0.992502	2912	14	8	0
ZH38T0033513	Intergenic	ENSG00000263740.2	RN7SL4P	misc_RNA	0.992486	1453	0	11	0
ZH38T0009692	Proximal	ENSG00000149289.11	ZC3H12C	protein_coding	0.992473	923	7	0	0
ZH38T0005480	Intron	ENSG00000168283.14, ENSG00000269897.5	BMI1 , COMMD3-BMI1	protein_coding, protein_coding	0.992446	18918	80	64	0
ZH38T0030125	Proximal	ENSG00000178602.8	OTOS	protein_coding	0.992424	524	2	2	0
ZH38T0042796	Intron	ENSG00000008196.13	TFAP2B	protein_coding	0.992366	130	0	1	0
ZH38T0048807	Intron	ENSG00000147804.9	SLC39A4	protein_coding	0.992352	50606	64	326	0
ZH38T0008363	Proximal	ENSG00000149115.14	TNKS1BP1	protein_coding	0.992287	7976	61	1	0
ZH38T0039331	Proximal	ENSG00000152939.17	MARVELD2	protein_coding	0.99223	6640	8	44	0
ZH38T0010112	Proximal	ENSG00000250073.3	AP000866.2	lncRNA	0.992202	5344	25	17	0
ZH38T0029983	Intron	ENSG00000182600.9	SNORC	protein_coding	0.992198	4578	6	30	0
ZH38T0010128	Intron	ENSG00000149557.13	FEZ1	protein_coding	0.992157	506	4	0	0
ZH38T0023807	Intron	ENSG00000076984.17	MAP2K7	protein_coding	0.992133	3405	0	27	0
ZH38T0013174	Proximal	ENSG00000121741.16	ZMYM2	protein_coding	0.992124	30231	180	60	0
ZH38T0000184	Intron	ENSG00000116251.11, ENSG00000116254.18, ENSG00000226944.1, ENSG00000285629.1	RPL22 , CHD5 , AL031847.1 , AL031847.2	protein_coding, protein_coding, lncRNA, protein_coding	0.992119	2392	6	13	0
ZH38T0033927	Intron	ENSG00000163808.17	KIF15	protein_coding	0.992105	754	4	2	0
ZH38T0006451	Proximal	ENSG00000152778.9	IFIT5	protein_coding	0.992097	40801	31	294	0
ZH38T0019936	Proximal	ENSG00000040633.13	PHF23	protein_coding	0.99209	8403	20	47	0
ZH38T0040132	Proximal	ENSG00000152700.14	SAR1B	protein_coding	0.992	496	0	4	0
ZH38T0037720	Proximal	ENSG00000174607.11	UGT8	protein_coding	0.991997	2603	13	8	0
ZH38T0040112	Proximal	ENSG00000213585.11	VDAC1	protein_coding	0.991989	13374	99	9	0
ZH38T0008841	Intron	ENSG00000014216.15	CAPN1	protein_coding	0.991968	1235	0	10	0
ZH38T0007927	Proximal	ENSG00000110700.7	RPS13	protein_coding	0.991931	53103	339	93	0
ZH38T0001293	Proximal	ENSG00000197273.4	GUCA2A	protein_coding	0.991919	491	1	3	0
ZH38T0024978	Intron	ENSG00000196235.14	SUPT5H	protein_coding	0.991826	1820	0	15	0
ZH38T0011931	Proximal	ENSG00000245651.3, ENSG00000257698.2	AC083805.1 , GIHCG	lncRNA, lncRNA	0.991758	1083	1	8	0
ZH38T0029751	Intron	ENSG00000175084.11	DES	protein_coding	0.991743	40597	50	288	0
ZH38T0011742	Intron	ENSG00000229117.9	RPL41	protein_coding	0.991738	15005	0	125	0
ZH38T0031460	Proximal	ENSG00000171700.14	RGS19	protein_coding	0.99173	6236	52	0	0
ZH38T0052416	Intergenic	ENSG00000029993.15	HMGB3	protein_coding	0.99162	355	1	2	0
ZH38T0034097	Proximal	ENSG00000172037.14	LAMB2	protein_coding	0.991608	8744	0	74	0
ZH38T0040329	Proximal	ENSG00000146007.10	ZMAT2	protein_coding	0.991602	88908	303	450	0
ZH38T0013811	Intron	ENSG00000276644.5	DACH1	protein_coding	0.991573	1412	8	4	0
ZH38T0026454	Intron	ENSG00000171848.15	RRM2	protein_coding	0.991565	11756	44	56	0
ZH38T0008759	Intron	ENSG00000257086.1	AP001453.4	lncRNA	0.991525	117	0	1	0
ZH38T0021375	Intron	ENSG00000159224.4	GIP	protein_coding	0.991501	350	2	1	0
ZH38T0021536	Proximal	ENSG00000243678.11	NME2	protein_coding	0.991479	483596	2256	1900	0
ZH38T0043536	Intergenic	ENSG00000164434.12	FABP7	protein_coding	0.991453	928	2	6	0
ZH38T0048878	Proximal	ENSG00000107104.18	KANK1	protein_coding	0.991422	7744	0	67	0
ZH38T0001982	Proximal	ENSG00000174021.11	GNG5	protein_coding	0.991417	481912	2812	1360	0
ZH38T0038430	Intron	ENSG00000218336.9	TENM3	protein_coding	0.991356	16974	144	4	0
ZH38T0047491	Proximal	ENSG00000147548.17	NSD3	protein_coding	0.991348	19708	20	152	0
ZH38T0003104	Intron	ENSG00000143549.21	TPM3	protein_coding	0.991338	113300	290	700	0
ZH38T0001742	Proximal	ENSG00000230798.5	FOXD3-AS1	lncRNA	0.991329	343	0	3	0
ZH38T0044390	Intron	ENSG00000182095.14	TNRC18	protein_coding	0.991309	3878	16	18	0
ZH38T0029012	Intron	ENSG00000170166.6	HOXD4	protein_coding	0.991228	339	1	2	0
ZH38T0045095	Intron	ENSG00000136205.17	TNS3	protein_coding	0.991197	12948	3	112	0
ZH38T0011607	Exon	ENSG00000037965.6	HOXC8	protein_coding	0.991189	450	0	4	0
ZH38T0018744	Intergenic	ENSG00000261466.2	AC136944.4	lncRNA	0.99115	336	3	0	0
ZH38T0025595	Proximal	ENSG00000104805.16	NUCB1	protein_coding	0.991135	4584	24	17	0
ZH38T0024408	Proximal	ENSG00000064607.17	SUGP2	protein_coding	0.991122	19648	32	144	0
ZH38T0048826	Intron	ENSG00000160972.9	PPP1R16A	protein_coding	0.991116	83226	0	746	0
ZH38T0041940	Proximal	ENSG00000206503.13	HLA-A	protein_coding	0.991054	18280	5	45	115
ZH38T0004999	Intron	ENSG00000214837.8	LINC01347	transcribed_unprocessed_pseudogene	0.991031	221	1	1	0
ZH38T0042710	Proximal	ENSG00000096384.20	HSP90AB1	protein_coding	0.991023	4416	24	16	0
ZH38T0012175	Proximal	ENSG00000177425.11	PAWR	protein_coding	0.991014	16652	11	140	0
ZH38T0023429	Intergenic	ENSG00000115266.11	APC2	protein_coding	0.990999	3413	27	4	0
ZH38T0008532	Proximal	ENSG00000229183.8	PGA4	protein_coding	0.990971	878	8	0	0
ZH38T0046796	Proximal	ENSG00000239911.2	PRKAG2-AS1	lncRNA	0.990947	1423	4	9	0
ZH38T0046702	Proximal	ENSG00000196453.8	ZNF777	protein_coding	0.99093	874	0	8	0
ZH38T0001223	Proximal	ENSG00000090621.14	PABPC4	protein_coding	0.990927	1966	2	16	0
ZH38T0042567	Intron	ENSG00000096088.16	PGC	protein_coding	0.990834	6810	0	63	0
ZH38T0007243	Proximal	ENSG00000176171.11	BNIP3	protein_coding	0.990796	248015	901	1403	0
ZH38T0024400	Intron	ENSG00000105669.14	COPE	protein_coding	0.990776	30076	132	148	0
ZH38T0036996	Proximal	ENSG00000171476.22	HOPX	protein_coding	0.99075	42414	6	390	0
ZH38T0002149	Intron	ENSG00000226835.3	AC097059.1	lncRNA	0.990734	5132	40	8	0
ZH38T0029284	Intron	ENSG00000115524.16	SF3B1	protein_coding	0.990666	6156	17	40	1
ZH38T0018769	Proximal	ENSG00000155330.10	C16orf87	protein_coding	0.990654	424	4	0	0
ZH38T0035277	Proximal	ENSG00000091527.15	CDV3	protein_coding	0.990642	22230	192	18	0
ZH38T0012584	Proximal	ENSG00000110876.9	SELPLG	protein_coding	0.990608	45356	2	428	0
ZH38T0004494	Proximal	ENSG00000117594.10	HSD11B1	protein_coding	0.990596	948	9	0	0
ZH38T0012538	Proximal	ENSG00000235162.8	C12orf75	protein_coding	0.990577	229164	2132	48	0
ZH38T0002112	Proximal	ENSG00000122406.14, ENSG00000207523.1	RPL5 , SNORA66	protein_coding, snoRNA	0.990565	32020	141	164	0
ZH38T0032834	Proximal	ENSG00000198792.13	TMEM184B	protein_coding	0.990539	18846	172	8	0
ZH38T0043114	Intergenic	ENSG00000135316.17	SYNCRIP	protein_coding	0.990507	16591	153	6	0
ZH38T0014300	Proximal	ENSG00000129538.14	RNASE1	protein_coding	0.990494	144414	0	1386	0
ZH38T0034051	Proximal	ENSG00000164054.15	SHISA5	protein_coding	0.99038	4427	12	31	0
ZH38T0002419	Proximal	ENSG00000155363.18	MOV10	protein_coding	0.990368	23032	12	212	0
ZH38T0026806	TSS	ENSG00000119760.16	SUPT7L	protein_coding	0.990314	29242	134	152	0
ZH38T0023743	Intron	ENSG00000125733.18	TRIP10	protein_coding	0.990307	21660	48	164	0
ZH38T0015292	Proximal	ENSG00000119655.10	NPC2	protein_coding	0.990267	135325	330	1000	0
ZH38T0003188	Proximal	ENSG00000163463.11	KRTCAP2	protein_coding	0.99025	3758	1	36	0
ZH38T0032024	Proximal	ENSG00000160255.18	ITGB2	protein_coding	0.990228	912	9	0	0
ZH38T0041212	Proximal	ENSG00000204628.11	RACK1	protein_coding	0.990226	58356	270	306	0
ZH38T0032751	Proximal	ENSG00000100362.13	PVALB	protein_coding	0.990196	101	1	0	0
ZH38T0025027	Proximal	ENSG00000160392.13	C19orf47	protein_coding	0.990174	7155	48	23	0
ZH38T0031061	Proximal	ENSG00000101470.10	TNNC2	protein_coding	0.990157	503	0	5	0
ZH38T0032011	Intergenic	ENSG00000184900.15	SUMO3	protein_coding	0.990148	804	2	6	0
ZH38T0046748	Intron	ENSG00000002933.9	TMEM176A	protein_coding	0.990148	603	0	6	0
ZH38T0024659	Intron	ENSG00000221857.7, ENSG00000266964.5	AC020907.2 , FXYD1	lncRNA, protein_coding	0.990117	21640	40	176	0
ZH38T0017350	Proximal	ENSG00000166503.9	HDGFL3	protein_coding	0.990063	39357	154	240	1
ZH38T0036081	Intron	ENSG00000073849.15	ST6GAL1	protein_coding	0.990024	27687	51	228	0
ZH38T0009737	Proximal	ENSG00000109846.8	CRYAB	protein_coding	0.989963	109084	228	878	0
ZH38T0010772	Proximal	ENSG00000205791.3	LOH12CR2	lncRNA	0.989942	3051	0	31	0
ZH38T0032106	Intron	ENSG00000160299.17	PCNT	protein_coding	0.989934	8064	31	51	0
ZH38T0019986	Proximal	ENSG00000174282.12	ZBTB4	protein_coding	0.989929	14843	53	96	2
ZH38T0000991	Intron	ENSG00000160050.14	CCDC28B	protein_coding	0.989925	6092	0	62	0
ZH38T0000979	Proximal	ENSG00000121774.18	KHDRBS1	protein_coding	0.989919	7070	22	50	0
ZH38T0049985	Intron	ENSG00000136938.9	ANP32B	protein_coding	0.989892	4211	41	2	0
ZH38T0011814	Proximal	ENSG00000166860.3	ZBTB39	protein_coding	0.989884	7437	22	54	0
ZH38T0029635	Intron	ENSG00000079308.19	TNS1	protein_coding	0.989867	145938	84	1410	0
ZH38T0025306	Proximal	ENSG00000130208.9	APOC1	protein_coding	0.989856	27810	85	200	0
ZH38T0010228	Proximal	ENSG00000196323.14	ZBTB44	protein_coding	0.989775	35236	104	260	0
ZH38T0027721	Proximal	ENSG00000162951.11	LRRTM1	protein_coding	0.989761	1160	0	12	0
ZH38T0020214	Intron	ENSG00000141027.21	NCOR1	protein_coding	0.989721	2022	0	21	0
ZH38T0043835	Proximal	ENSG00000164442.10	CITED2	protein_coding	0.989675	26646	0	278	0
ZH38T0022431	Intron	ENSG00000176155.19	CCDC57	protein_coding	0.989641	33246	117	231	0
ZH38T0036964	Intron	ENSG00000134852.15	CLOCK	protein_coding	0.989637	1146	0	12	0
ZH38T0033449	Intron	ENSG00000144711.16	IQSEC1	protein_coding	0.98961	3429	36	0	0
ZH38T0004419	Intron	ENSG00000162894.12	FCMR	protein_coding	0.989597	2283	21	3	0
ZH38T0012988	Intron	ENSG00000111328.7	CDK2AP1	protein_coding	0.989588	7413	9	69	0
ZH38T0045706	Proximal	ENSG00000196367.13	TRRAP	protein_coding	0.98951	21507	228	0	0
ZH38T0025063	Proximal	ENSG00000261857.7, ENSG00000268975.2	MIA , MIA-RAB4B	protein_coding, protein_coding	0.989488	753	7	1	0
ZH38T0044719	Proximal	ENSG00000122565.19	CBX3	protein_coding	0.989425	84486	462	441	0
ZH38T0049231	Exon	ENSG00000107341.5	UBE2R2	protein_coding	0.98941	5699	31	30	0
ZH38T0027021	Intron	ENSG00000188010.14	MORN2	protein_coding	0.989409	3550	24	14	0
ZH38T0020157	Proximal	ENSG00000133020.4	MYH8	protein_coding	0.989399	280	2	1	0
ZH38T0001602	Intron	ENSG00000143006.7	DMRTB1	protein_coding	0.989362	186	0	2	0
ZH38T0012120	Intron	ENSG00000139278.10	GLIPR1	protein_coding	0.989324	834	2	7	0
ZH38T0051670	Proximal	ENSG00000147160.9	AWAT2	protein_coding	0.989324	278	1	2	0
ZH38T0042291	Proximal	ENSG00000231500.7	RPS18	protein_coding	0.989319	1482	4	12	0
ZH38T0032760	Proximal	ENSG00000187045.18	TMPRSS6	protein_coding	0.989286	1662	14	4	0
ZH38T0044382	Proximal	ENSG00000157927.16	RADIL	protein_coding	0.989257	2210	21	3	0
ZH38T0006284	Intron	ENSG00000108175.17	ZMIZ1	protein_coding	0.989252	4418	28	20	0
ZH38T0022459	Intron	ENSG00000141562.18	NARF	protein_coding	0.989221	5965	0	65	0
ZH38T0000239	Proximal	ENSG00000162426.14	SLC45A1	protein_coding	0.989201	8519	17	76	0
ZH38T0034243	Exon	ENSG00000239732.3	TLR9	protein_coding	0.989186	3476	0	38	0
ZH38T0005236	Proximal	ENSG00000134453.16	RBM17	protein_coding	0.989155	11492	102	24	0
ZH38T0041247	Intron	ENSG00000112699.11	GMDS	protein_coding	0.98913	728	0	8	0
ZH38T0011606	Proximal	ENSG00000180806.5	HOXC9	protein_coding	0.989084	2084	0	23	0
ZH38T0023241	Intron	ENSG00000150636.17	CCDC102B	protein_coding	0.989071	362	1	3	0
ZH38T0046876	Intron	ENSG00000126870.16	WDR60	protein_coding	0.989058	2802	7	24	0
ZH38T0040322	Proximal	ENSG00000113141.18	IK	protein_coding	0.989044	4604	9	42	0
ZH38T0024292	Proximal	ENSG00000053501.13	USE1	protein_coding	0.989029	42370	32	438	0
ZH38T0003711	Intron	ENSG00000007908.16	SELE	protein_coding	0.989011	900	0	10	0
ZH38T0010628	Intron	ENSG00000166532.16, ENSG00000255829.1	RIMKLB , AC092490.2	protein_coding, lncRNA	0.989011	180	2	0	0
ZH38T0032687	Proximal	ENSG00000198125.13	MB	protein_coding	0.988959	1881	0	21	0
ZH38T0050721	Intron	ENSG00000130635.15	COL5A1	protein_coding	0.988919	16064	82	98	0
ZH38T0040512	Intron	ENSG00000133710.15	SPINK5	protein_coding	0.988906	25672	88	200	0
ZH38T0012705	Proximal	ENSG00000089248.7	ERP29	protein_coding	0.988904	4278	16	32	0
ZH38T0003108	Proximal	ENSG00000143549.21	TPM3	protein_coding	0.988885	16548	90	96	0
ZH38T0032912	Exon	ENSG00000128272.14	ATF4	protein_coding	0.98885	15432	0	174	0
ZH38T0036834	Intron	ENSG00000064042.18	LIMCH1	protein_coding	0.988843	31908	108	252	0
ZH38T0004149	Intron	ENSG00000116852.14	KIF21B	protein_coding	0.988788	18696	60	152	0
ZH38T0049622	Exon	ENSG00000135046.14	ANXA1	protein_coding	0.988783	29442	64	270	0
ZH38T0010572	Intergenic	ENSG00000159403.18	C1R	protein_coding	0.98878	1410	16	0	0
ZH38T0006940	Proximal	ENSG00000119950.21	MXI1	protein_coding	0.988743	527	5	1	0
ZH38T0014802	TSS	ENSG00000165502.6	RPL36AL	protein_coding	0.988722	263	1	2	0
ZH38T0045927	Intron	ENSG00000106436.6	MYL10	protein_coding	0.988701	350	0	4	0
ZH38T0052457	Intron	ENSG00000182492.16	BGN	protein_coding	0.988679	1048	8	4	0
ZH38T0030729	Intron	ENSG00000125971.16	DYNLRB1	protein_coding	0.988679	524	0	6	0
ZH38T0022904	Intron	ENSG00000260552.1	AC023043.1	lncRNA	0.988679	524	0	6	0
ZH38T0050608	Intron	ENSG00000130707.17	ASS1	protein_coding	0.988624	5475	3	60	0
ZH38T0023356	Proximal	ENSG00000099864.18	PALM	protein_coding	0.988585	31004	358	0	0
ZH38T0041036	Intron	ENSG00000169220.18	RGS14	protein_coding	0.988557	4665	0	54	0
ZH38T0042177	Proximal	ENSG00000204366.3	ZBTB12	protein_coding	0.988543	1208	0	14	0
ZH38T0018875	Proximal	ENSG00000087250.8	MT3	protein_coding	0.988468	2400	0	28	0
ZH38T0036602	Proximal	ENSG00000137440.4	FGFBP1	protein_coding	0.988451	4536	4	49	0
ZH38T0041037	Intron	ENSG00000169220.18	RGS14	protein_coding	0.988437	6326	1	73	0
ZH38T0040778	Intron	ENSG00000113312.11	TTC1	protein_coding	0.988363	2548	4	26	0
ZH38T0009891	Intron	ENSG00000167257.11	RNF214	protein_coding	0.988304	1352	0	16	0
ZH38T0002683	Proximal	ENSG00000265972.5	TXNIP	protein_coding	0.988298	19594	6	226	0
ZH38T0046767	Proximal	ENSG00000164889.14	SLC4A2	protein_coding	0.988263	2526	24	6	0
ZH38T0034652	Proximal	ENSG00000080200.10	CRYBG3	protein_coding	0.988263	2526	8	22	0
ZH38T0041607	Proximal	ENSG00000124795.17	DEK	protein_coding	0.988248	160452	480	1428	0
ZH38T0015313	Intron	ENSG00000170348.9	TMED10	protein_coding	0.988242	3614	15	28	0
ZH38T0010130	Proximal	ENSG00000149557.13	FEZ1	protein_coding	0.988235	18900	66	159	0
ZH38T0009331	Intron	ENSG00000137474.22	MYO7A	protein_coding	0.988235	1008	12	0	0
ZH38T0048647	Proximal	ENSG00000184489.11	PTP4A3	protein_coding	0.988217	24824	296	0	0
ZH38T0010532	Proximal	ENSG00000111676.15	ATN1	protein_coding	0.98821	5029	28	32	0
ZH38T0041938	Proximal	ENSG00000206503.13	HLA-A	protein_coding	0.98819	93295	50	920	145
ZH38T0040503	Intron	ENSG00000164265.9	SCGB3A2	protein_coding	0.988189	251	2	1	0
ZH38T0032838	Proximal	ENSG00000213923.12	CSNK1E	protein_coding	0.98818	8360	45	55	0
ZH38T0029013	Intron	ENSG00000128652.11, ENSG00000170166.6	HOXD3 , HOXD4	protein_coding, protein_coding	0.988166	501	3	3	0
ZH38T0010874	Proximal	ENSG00000008394.13	MGST1	protein_coding	0.988109	4155	25	25	0
ZH38T0032808	Intron	ENSG00000100139.13	MICALL1	protein_coding	0.988105	1163	2	12	0
ZH38T0026015	Proximal	ENSG00000170889.14	RPS9	protein_coding	0.988105	61054	182	553	0
ZH38T0006047	Proximal	ENSG00000165732.13	DDX21	protein_coding	0.988099	6642	4	76	0
ZH38T0046913	Intron	ENSG00000036448.10	MYOM2	protein_coding	0.988095	332	0	4	0
ZH38T0028408	Intron	ENSG00000136731.12	UGGT1	protein_coding	0.988038	1239	0	15	0
ZH38T0024380	Proximal	ENSG00000130511.16	SSBP4	protein_coding	0.988037	4625	0	56	0
ZH38T0001609	Proximal	ENSG00000081870.11	HSPB11	protein_coding	0.987987	131748	1578	24	0
ZH38T0048100	Intron	ENSG00000197275.14	RAD54B	protein_coding	0.987952	492	0	6	0
ZH38T0033586	Proximal	ENSG00000174748.21	RPL15	protein_coding	0.987918	81684	9	990	0
ZH38T0026091	Proximal	ENSG00000129991.13	TNNI3	protein_coding	0.987913	2125	12	14	0
ZH38T0023927	Intron	ENSG00000129354.11	AP1M2	protein_coding	0.987891	1958	14	10	0
ZH38T0011381	Exon	ENSG00000185432.12	METTL7A	protein_coding	0.987791	890	0	11	0
ZH38T0035692	Proximal	ENSG00000283154.2	IQCJ-SCHIP1	protein_coding	0.987778	3637	1	44	0
ZH38T0039349	Proximal	ENSG00000145734.19	BDP1	protein_coding	0.987778	9698	18	102	0
ZH38T0007574	Exon	ENSG00000167244.21	IGF2	protein_coding	0.987749	8224	84	18	0
ZH38T0006042	Proximal	ENSG00000165730.16	STOX1	protein_coding	0.987676	2805	35	0	0
ZH38T0029747	Proximal	ENSG00000123992.19	DNPEP	protein_coding	0.987615	3748	24	23	0
ZH38T0023938	Proximal	ENSG00000129351.17	ILF3	protein_coding	0.9876	5416	8	60	0
ZH38T0030890	Intron	ENSG00000132792.19	CTNNBL1	protein_coding	0.987578	1272	0	16	0
ZH38T0000702	Proximal	ENSG00000142676.14	RPL11	protein_coding	0.987552	122805	834	714	0
ZH38T0027251	Intron	ENSG00000115306.16	SPTBN1	protein_coding	0.987538	5230	4	62	0
ZH38T0000515	Proximal	ENSG00000117122.13	MFAP2	protein_coding	0.987509	85065	1062	14	0
ZH38T0003116	Proximal	ENSG00000143569.19	UBAP2L	protein_coding	0.987506	53112	372	300	0
ZH38T0020765	Proximal	ENSG00000125691.13	RPL23	protein_coding	0.987487	120114	21	1501	0
ZH38T0014873	Proximal	ENSG00000139926.15	FRMD6	protein_coding	0.98747	11348	96	48	0
ZH38T0008177	Proximal	ENSG00000026508.18	CD44	protein_coding	0.987424	4240	40	14	0
ZH38T0029532	Intron	ENSG00000021826.15	CPS1	protein_coding	0.987421	157	1	1	0
ZH38T0036969	Intron	ENSG00000109255.11	NMU	protein_coding	0.987413	2824	24	12	0
ZH38T0048128	Proximal	ENSG00000175895.4	PLEKHF2	protein_coding	0.987407	17720	68	156	2
ZH38T0023737	Intergenic	ENSG00000125730.16	C3	protein_coding	0.987402	627	8	0	0
ZH38T0000978	Proximal	ENSG00000121774.18	KHDRBS1	protein_coding	0.987391	17698	54	172	0
ZH38T0019423	Intron	ENSG00000154099.18	DNAAF1	protein_coding	0.987374	391	2	3	0
ZH38T0003441	Proximal	ENSG00000158710.14	TAGLN2	protein_coding	0.98734	358582	1404	3194	0
ZH38T0050161	Proximal	ENSG00000136813.14	ECPAS	protein_coding	0.987333	9042	116	0	0
ZH38T0014440	Intergenic	ENSG00000197616.12	MYH6	protein_coding	0.987314	3580	1	45	0
ZH38T0016371	TSS	ENSG00000174197.16	MGA	protein_coding	0.987311	13227	22	148	0
ZH38T0004162	Intron	ENSG00000118194.20, ENSG00000286600.1	TNNT2 , AC119427.2	protein_coding, lncRNA	0.987274	34289	153	289	0
ZH38T0050162	Proximal	ENSG00000136813.14	ECPAS	protein_coding	0.987263	18835	222	21	0
ZH38T0003870	Intergenic	ENSG00000057252.13	SOAT1	protein_coding	0.987261	620	5	3	0
ZH38T0020771	Proximal	ENSG00000002834.18	LASP1	protein_coding	0.987207	2778	36	0	0
ZH38T0045715	Intron	ENSG00000241685.10, ENSG00000284292.1	ARPC1A , AC004922.1	protein_coding, protein_coding	0.987113	766	4	6	0
ZH38T0045975	Intron	ENSG00000189056.14	RELN	protein_coding	0.987097	459	3	3	0
ZH38T0042899	Proximal	ENSG00000112208.11	BAG2	protein_coding	0.987093	103165	464	885	0
ZH38T0004420	Intron	ENSG00000162894.12	FCMR	protein_coding	0.987082	5043	15	51	0
ZH38T0012540	Intron	ENSG00000235162.8	C12orf75	protein_coding	0.987069	4580	24	36	0
ZH38T0048649	Intron	ENSG00000184489.11	PTP4A3	protein_coding	0.987062	8392	14	96	0
ZH38T0026112	Intron	ENSG00000160469.16	BRSK1	protein_coding	0.987055	915	0	9	3
ZH38T0019182	Proximal	ENSG00000132612.16	VPS4A	protein_coding	0.987013	4788	29	34	0
ZH38T0007548	Intergenic	ENSG00000283787.1	PRR33	protein_coding	0.986971	303	0	4	0
ZH38T0007520	Intron	ENSG00000244242.2, ENSG00000250644.3	IFITM10 , AC068580.4	protein_coding, protein_coding	0.986928	453	6	0	0
ZH38T0039691	Proximal	ENSG00000164292.13	RHOBTB3	protein_coding	0.98692	21126	34	246	0
ZH38T0026153	Proximal	ENSG00000063245.14	EPN1	protein_coding	0.986913	14404	78	113	0
ZH38T0037883	Proximal	ENSG00000138709.19	LARP1B	protein_coding	0.9869	11074	112	35	0
ZH38T0050978	Intron	ENSG00000167393.17	PPP2R3B	protein_coding	0.9869	904	11	1	0
ZH38T0012961	Intron	ENSG00000130787.14	HIP1R	protein_coding	0.986886	6246	20	63	0
ZH38T0024226	Intron	ENSG00000141867.17	BRD4	protein_coding	0.986884	14146	188	0	0
ZH38T0029596	Proximal	ENSG00000197756.9	RPL37A	protein_coding	0.98688	168794	364	1880	0
ZH38T0015805	Intron	ENSG00000166165.13	CKB	protein_coding	0.986873	7067	0	94	0
ZH38T0011346	Proximal	ENSG00000139644.13	TMBIM6	protein_coding	0.986869	15332	52	152	0
ZH38T0044464	TSS	ENSG00000164654.16	MIOS	protein_coding	0.986853	9908	37	95	0
ZH38T0032191	Intron	ENSG00000100056.12	ESS2	protein_coding	0.986832	1349	7	11	0
ZH38T0021772	Intron	ENSG00000087191.13	PSMC5	protein_coding	0.986828	3596	0	48	0
ZH38T0050100	Proximal	ENSG00000119318.13	RAD23B	protein_coding	0.986762	79312	468	596	0
ZH38T0013011	Intron	ENSG00000197653.15	DNAH10	protein_coding	0.986755	447	0	6	0
ZH38T0011717	Proximal	ENSG00000205323.9	SARNP	protein_coding	0.986696	445	4	2	0
ZH38T0001209	Intron	ENSG00000127603.26	MACF1	protein_coding	0.986628	10182	6	132	0
ZH38T0043567	Intron	ENSG00000111907.21	TPD52L1	protein_coding	0.986607	6630	20	70	0
ZH38T0048321	Proximal	ENSG00000147654.15	EBAG9	protein_coding	0.986574	102288	216	1176	0
ZH38T0029077	Intron	ENSG00000187231.14	SESTD1	protein_coding	0.986572	1396	9	10	0
ZH38T0019651	Proximal	ENSG00000159842.15	ABR	protein_coding	0.986526	2050	11	17	0
ZH38T0002146	Intron	ENSG00000226835.3	AC097059.1	lncRNA	0.986486	876	8	4	0
ZH38T0051490	Proximal	ENSG00000274274.1	GAGE13	protein_coding	0.986486	292	2	2	0
ZH38T0040409	Intron	ENSG00000156453.13	PCDH1	protein_coding	0.986479	5034	3	66	0
ZH38T0012825	Intron	ENSG00000122966.16	CIT	protein_coding	0.986469	6999	45	51	0
ZH38T0022576	Intron	ENSG00000082397.17	EPB41L3	protein_coding	0.986435	20070	180	96	0
ZH38T0021345	Proximal	ENSG00000260027.4	HOXB7	protein_coding	0.986433	5017	0	69	0
ZH38T0003040	Proximal	ENSG00000196154.12	S100A4	protein_coding	0.986404	2104	0	29	0
ZH38T0050265	Intron	ENSG00000136861.18	CDK5RAP2	protein_coding	0.986403	17193	111	126	0
ZH38T0038967	Proximal	ENSG00000132357.14	CARD6	protein_coding	0.986386	4492	42	20	0
ZH38T0006501	Intron	ENSG00000119912.16	IDE	protein_coding	0.98637	2750	24	14	0
ZH38T0015703	Proximal	ENSG00000185559.16	DLK1	protein_coding	0.986364	651	0	9	0
ZH38T0034070	Proximal	ENSG00000068745.15	IP6K2	protein_coding	0.986353	4192	4	54	0
ZH38T0004156	Intron	ENSG00000163395.16	IGFN1	protein_coding	0.986301	576	8	0	0
ZH38T0046911	Proximal	ENSG00000176595.4, ENSG00000253696.2	KBTBD11 , KBTBD11-OT1	protein_coding, lncRNA	0.986275	12719	136	41	0
ZH38T0025456	Intron	ENSG00000130749.10	AC008755.1	protein_coding	0.986255	78068	724	363	1
ZH38T0052629	Intron	ENSG00000229308.1	AC010737.1	lncRNA	0.986207	143	0	2	0
ZH38T0040318	Intron	ENSG00000113141.18	IK	protein_coding	0.986188	357	1	4	0
ZH38T0001428	Intergenic	ENSG00000117450.14	PRDX1	protein_coding	0.986175	214	0	3	0
ZH38T0041334	Proximal	ENSG00000153046.18	CDYL	protein_coding	0.986166	499	0	7	0
ZH38T0006143	Intron	ENSG00000148719.15	DNAJB12	protein_coding	0.98616	7838	0	110	0
ZH38T0025877	Exon	ENSG00000105379.9, ENSG00000269403.1	ETFB , AC008750.8	protein_coding, protein_coding	0.986136	17925	72	180	0
ZH38T0030661	Intron	ENSG00000088325.16	TPX2	protein_coding	0.986068	1274	2	16	0
ZH38T0009207	Intron	ENSG00000186635.14	ARAP1	protein_coding	0.986047	5936	16	68	0
ZH38T0040445	Proximal	ENSG00000113580.15	NR3C1	protein_coding	0.986045	60060	20	830	0
ZH38T0000948	Intergenic	ENSG00000121769.7	FABP3	protein_coding	0.985999	1338	19	0	0
ZH38T0048629	Proximal	ENSG00000104472.10	CHRAC1	protein_coding	0.985998	125064	656	1120	0
ZH38T0048912	Proximal	ENSG00000080608.10	PUM3	protein_coding	0.985987	774	0	11	0
ZH38T0012736	Intron	ENSG00000123064.12	DDX54	protein_coding	0.985983	5768	0	82	0
ZH38T0045859	Proximal	ENSG00000087087.20	SRRT	protein_coding	0.985969	6184	76	12	0
ZH38T0018118	Proximal	ENSG00000189067.12	LITAF	protein_coding	0.985957	54835	44	737	0
ZH38T0027439	Proximal	ENSG00000221823.11	PPP3R1	protein_coding	0.985947	14032	150	50	0
ZH38T0044724	Proximal	ENSG00000086300.15	SNX10	protein_coding	0.985936	1332	5	14	0
ZH38T0041048	Intron	ENSG00000131188.12	PRR7	protein_coding	0.985915	2940	0	42	0
ZH38T0019962	Proximal	ENSG00000132522.16	GPS2	protein_coding	0.9859	46497	116	549	0
ZH38T0005263	Intergenic	ENSG00000123243.15	ITIH5	protein_coding	0.98583	487	4	3	0
ZH38T0026624	Proximal	ENSG00000055917.15	PUM2	protein_coding	0.985799	7636	108	2	0
ZH38T0020218	Intron	ENSG00000141027.21	NCOR1	protein_coding	0.985778	4436	8	56	0
ZH38T0013003	Exon	ENSG00000086598.11	TMED2	protein_coding	0.985764	26728	18	368	0
ZH38T0050871	Intron	ENSG00000181090.21	EHMT1	protein_coding	0.985746	3596	4	48	0
ZH38T0020391	Proximal	ENSG00000124422.12	USP22	protein_coding	0.985719	5936	76	10	0
ZH38T0051054	Proximal	ENSG00000146950.13	SHROOM2	protein_coding	0.985714	1380	0	20	0
ZH38T0029002	Intergenic	ENSG00000128713.13	HOXD11	protein_coding	0.98569	6475	62	31	1
ZH38T0010595	Proximal	ENSG00000177575.12	CD163	protein_coding	0.985634	9880	40	104	0
ZH38T0018370	Intron	ENSG00000058600.16	POLR3E	protein_coding	0.985599	5475	10	70	0
ZH38T0017211	Intron	ENSG00000169783.12	LINGO1	protein_coding	0.985577	205	0	3	0
ZH38T0018376	Proximal	ENSG00000237296.9	SMG1P1	transcribed_unprocessed_pseudogene	0.985572	1776	10	16	0
ZH38T0036391	Intron	ENSG00000168924.15	LETM1	protein_coding	0.985515	7144	55	50	0
ZH38T0021628	Proximal	ENSG00000213246.7	SUPT4H1	protein_coding	0.985514	10545	112	43	0
ZH38T0041606	Proximal	ENSG00000124795.17	DEK	protein_coding	0.985514	40002	156	432	0
ZH38T0016206	Intron	ENSG00000159251.7	ACTC1	protein_coding	0.985491	10868	0	160	0
ZH38T0013263	Intron	ENSG00000132932.17	ATP8A2	protein_coding	0.985465	1356	10	10	0
ZH38T0015403	TSS	ENSG00000211448.12	DIO2	protein_coding	0.985451	15037	4	218	0
ZH38T0011659	Proximal	ENSG00000161634.11	DCD	protein_coding	0.985447	51056	612	142	0
ZH38T0004798	Proximal	ENSG00000143793.13	C1orf35	protein_coding	0.985442	1963	1	28	0
ZH38T0036826	Intron	ENSG00000154277.12	UCHL1	protein_coding	0.985431	18668	156	120	0
ZH38T0033540	Intron	ENSG00000131378.14	RFTN1	protein_coding	0.985419	1622	4	20	0
ZH38T0020935	Intron	ENSG00000094796.5	KRT31	protein_coding	0.985366	606	0	9	0
ZH38T0015875	Exon	ENSG00000182809.10	CRIP2	protein_coding	0.985345	69523	972	62	0
ZH38T0021186	Proximal	ENSG00000073670.14	ADAM11	protein_coding	0.985342	1210	12	6	0
ZH38T0018942	Intron	ENSG00000205336.11	ADGRG1	protein_coding	0.985294	5360	72	8	0
ZH38T0048481	Intron	ENSG00000255491.3	AC100858.3	lncRNA	0.985282	3481	0	52	0
ZH38T0033089	Intron	ENSG00000100347.15	SAMM50	protein_coding	0.985269	2341	10	25	0
ZH38T0039693	Proximal	ENSG00000173221.14	GLRX	protein_coding	0.985229	23345	45	305	0
ZH38T0019171	TSS	ENSG00000039068.19	CDH1	protein_coding	0.985163	3652	13	42	0
ZH38T0035130	Proximal	ENSG00000114631.11	PODXL2	protein_coding	0.985149	398	3	3	0
ZH38T0027267	Proximal	ENSG00000143947.13	RPS27A	protein_coding	0.985104	34124	140	376	0
ZH38T0034009	Proximal	ENSG00000114650.20	SCAP	protein_coding	0.9851	72328	998	94	2
ZH38T0044385	Proximal	ENSG00000273313.1	RBAKDN	lncRNA	0.985095	727	0	11	0
ZH38T0037243	Intron	ENSG00000138758.11	2021-09-11	protein_coding	0.985094	30400	100	360	0
ZH38T0030217	Intron	ENSG00000196476.12	C20orf96	protein_coding	0.985084	4953	75	0	0
ZH38T0023638	Intron	ENSG00000127663.15	KDM4B	protein_coding	0.985075	1386	15	6	0
ZH38T0046602	Proximal	ENSG00000211751.9, ENSG00000211772.11, ENSG00000278030.1	TRBC1 , TRBC2 , TRBV7-9	TR_C_gene, TR_C_gene, TR_V_gene	0.985037	395	4	2	0
ZH38T0033956	Proximal	ENSG00000121807.5	CCR2	protein_coding	0.985033	5660	10	76	0
ZH38T0047496	Intron	ENSG00000165046.12	LETM2	protein_coding	0.985028	18750	95	190	0
ZH38T0017795	Intron	ENSG00000131634.14	TMEM204	protein_coding	0.985019	789	3	9	0
ZH38T0026469	Proximal	ENSG00000143870.12	PDIA6	protein_coding	0.98498	598336	8944	178	2
ZH38T0008296	Intron	ENSG00000175216.14	CKAP5	protein_coding	0.984962	393	3	3	0
ZH38T0025043	Intron	ENSG00000160410.15	SHKBP1	protein_coding	0.984962	262	0	4	0
ZH38T0035542	Proximal	ENSG00000174944.9	P2RY14	protein_coding	0.984953	1571	5	19	0
ZH38T0024195	Proximal	ENSG00000123143.12	PKN1	protein_coding	0.984945	2159	31	2	0
ZH38T0031759	Intron	ENSG00000159200.18	RCAN1	protein_coding	0.984927	42342	0	648	0
ZH38T0031923	Intron	ENSG00000160180.15	TFF3	protein_coding	0.984903	2740	0	42	0
ZH38T0026010	Proximal	ENSG00000125505.17	MBOAT7	protein_coding	0.984898	44738	496	190	0
ZH38T0004240	Proximal	ENSG00000117139.17	KDM5B	protein_coding	0.984855	23410	90	270	0
ZH38T0045928	Intron	ENSG00000106436.6	MYL10	protein_coding	0.984848	715	4	7	0
ZH38T0033545	Proximal	ENSG00000092345.13	DAZL	protein_coding	0.984848	260	2	2	0
ZH38T0039175	Intron	ENSG00000152932.8	RAB3C	protein_coding	0.984816	908	9	5	0
ZH38T0050160	Intron	ENSG00000136813.14	ECPAS	protein_coding	0.984799	37706	582	0	0
ZH38T0027858	Proximal	ENSG00000211592.8, ENSG00000240671.4, ENSG00000241755.1	IGKC , IGKV1-8 , IGKV1-9	IG_C_gene, IG_V_gene, IG_V_gene	0.984774	7438	17	98	0
ZH38T0010542	Proximal	ENSG00000111678.11	C12orf57	protein_coding	0.984772	1940	0	30	0
ZH38T0024386	Proximal	ENSG00000105701.16	FKBP8	protein_coding	0.98472	11600	12	168	0
ZH38T0012726	Intron	ENSG00000089169.15	RPH3A	protein_coding	0.984694	965	10	5	0
ZH38T0021468	Proximal	ENSG00000167105.8	TMEM92	protein_coding	0.984682	2057	32	0	0
ZH38T0024132	Intron	ENSG00000008441.16	NFIX	protein_coding	0.984667	21064	192	136	0
ZH38T0037103	Proximal	ENSG00000132463.14	GRSF1	protein_coding	0.984658	35235	162	387	0
ZH38T0034304	Intron	ENSG00000272886.6	DCP1A	protein_coding	0.984645	1026	0	16	0
ZH38T0047877	Intron	ENSG00000040341.18	STAU2	protein_coding	0.984576	3830	20	40	0
ZH38T0011543	Proximal	ENSG00000182544.8	MFSD5	protein_coding	0.984568	28328	12	432	0
ZH38T0009942	Intron	ENSG00000019144.19	PHLDB1	protein_coding	0.984562	30612	72	408	0
ZH38T0015804	Intron	ENSG00000166165.13	CKB	protein_coding	0.984552	3569	2	54	0
ZH38T0016873	Proximal	ENSG00000166794.4	PPIB	protein_coding	0.984533	474607	1661	5790	5
ZH38T0037799	Intron	ENSG00000050730.16	TNIP3	protein_coding	0.984483	3426	24	30	0
ZH38T0042556	Intron	ENSG00000234753.5	FOXP4-AS1	lncRNA	0.984483	1713	6	21	0
ZH38T0046180	Proximal	ENSG00000105974.12	CAV1	protein_coding	0.984444	3544	0	56	0
ZH38T0023045	Intergenic	ENSG00000176624.11	MEX3C	protein_coding	0.984432	1075	6	11	0
ZH38T0004754	Proximal	ENSG00000163041.11	H3F3A	protein_coding	0.984427	106515	224	1461	0
ZH38T0050226	Intergenic	ENSG00000228278.4	ORM2	protein_coding	0.984425	2781	39	5	0
ZH38T0033023	Proximal	ENSG00000100167.20	2021-09-03	protein_coding	0.984424	2844	3	42	0
ZH38T0032066	Intron	ENSG00000142156.14	COL6A1	protein_coding	0.984411	20334	310	12	0
ZH38T0005159	Intron	ENSG00000233321.2	LINC02669	lncRNA	0.984392	883	0	14	0
ZH38T0038227	Proximal	ENSG00000171497.5	PPID	protein_coding	0.984368	2078	8	25	0
ZH38T0051473	Proximal	ENSG00000068323.17	TFE3	protein_coding	0.984333	9487	73	78	0
ZH38T0038883	Proximal	ENSG00000168724.17	DNAJC21	protein_coding	0.984315	26985	15	415	0
ZH38T0025987	Proximal	ENSG00000179820.16	MYADM	protein_coding	0.984301	42510	8	670	0
ZH38T0025998	Proximal	ENSG00000170906.15	NDUFA3	protein_coding	0.984288	11652	162	24	0
ZH38T0026076	Intron	ENSG00000105048.17	TNNT1	protein_coding	0.984252	4000	56	8	0
ZH38T0003050	Proximal	ENSG00000188643.11	S100A16	protein_coding	0.984226	73002	459	711	0
ZH38T0024022	Proximal	ENSG00000130165.10	ELOF1	protein_coding	0.984223	3244	44	8	0
ZH38T0028872	Intron	ENSG00000239474.7, ENSG00000251569.1	KLHL41 , AC093899.2	protein_coding, protein_coding	0.984197	2242	8	28	0
ZH38T0002863	Proximal	ENSG00000143418.19	CERS2	protein_coding	0.984162	114954	1226	624	0
ZH38T0043653	Intron	ENSG00000198945.7	L3MBTL3	protein_coding	0.984148	2235	36	0	0
ZH38T0005835	Intergenic	ENSG00000266217.2	CTSLP2	unprocessed_pseudogene	0.984117	1549	25	0	0
ZH38T0003730	Intron	ENSG00000116132.12	PRRX1	protein_coding	0.983945	4290	8	62	0
ZH38T0033198	Proximal	ENSG00000182858.14	ALG12	protein_coding	0.983915	4343	65	6	0
ZH38T0016370	Proximal	ENSG00000174197.16	MGA	protein_coding	0.983911	9540	19	137	0
ZH38T0023028	Intron	ENSG00000154832.14	CXXC1	protein_coding	0.98391	2813	0	46	0
ZH38T0010319	Proximal	ENSG00000082805.20	ERC1	protein_coding	0.983906	5502	54	36	0
ZH38T0019314	Intron	ENSG00000153774.9	CFDP1	protein_coding	0.983884	14164	141	91	0
ZH38T0044861	Proximal	ENSG00000170852.11	KBTBD2	protein_coding	0.983875	20379	298	36	0
ZH38T0016887	Proximal	ENSG00000166831.9	RBPMS2	protein_coding	0.983816	3465	57	0	0
ZH38T0034203	Proximal	ENSG00000114738.11	MAPKAPK3	protein_coding	0.983775	8610	110	32	0
ZH38T0022679	Proximal	ENSG00000141385.9	AFG3L2	protein_coding	0.98375	787	8	5	0
ZH38T0008302	Intron	ENSG00000165912.16	PACSIN3	protein_coding	0.98374	11858	24	172	0
ZH38T0035023	Proximal	ENSG00000173193.15	PARP14	protein_coding	0.983718	1450	21	3	0
ZH38T0006833	Exon	ENSG00000148798.11	INA	protein_coding	0.9837	3983	34	32	0
ZH38T0013008	Intron	ENSG00000111358.14	GTF2H3	protein_coding	0.983696	543	0	9	0
ZH38T0019823	Intergenic	ENSG00000108515.17	ENO3	protein_coding	0.983624	6487	91	17	0
ZH38T0044799	Intron	ENSG00000136193.17	SCRN1	protein_coding	0.983607	3900	0	65	0
ZH38T0026979	Intron	ENSG00000115828.17	QPCT	protein_coding	0.983607	780	3	10	0
ZH38T0052267	Intron	ENSG00000076770.14	MBNL3	protein_coding	0.983577	26352	256	184	0
ZH38T0008279	Intron	ENSG00000157613.10	CREB3L1	protein_coding	0.983563	2573	9	34	0
ZH38T0009346	Intron	ENSG00000048649.13	RSF1	protein_coding	0.983553	1196	0	20	0
ZH38T0040460	Intron	ENSG00000156463.18	SH3RF2	protein_coding	0.983516	3580	10	50	0
ZH38T0006126	Proximal	ENSG00000122863.6	CHST3	protein_coding	0.983509	3459	1	57	0
ZH38T0039923	Intron	ENSG00000113083.14	LOX	protein_coding	0.983487	7266	62	60	0
ZH38T0015372	Proximal	ENSG00000177108.5	ZDHHC22	protein_coding	0.983471	595	9	1	0
ZH38T0047331	Proximal	ENSG00000120885.21	CLU	protein_coding	0.983458	25149	93	330	0
ZH38T0026954	Proximal	ENSG00000171055.15	FEZ2	protein_coding	0.983451	7250	80	42	0
ZH38T0032641	Proximal	ENSG00000100225.18	FBXO7	protein_coding	0.98343	47718	300	504	0
ZH38T0034428	Proximal	ENSG00000163634.12	THOC7	protein_coding	0.983404	11555	30	165	0
ZH38T0029874	Proximal	ENSG00000153827.13	TRIP12	protein_coding	0.9834	17061	132	156	0
ZH38T0036209	Proximal	ENSG00000229334.1	AC046143.1	lncRNA	0.98336	1241	12	9	0
ZH38T0016063	TSS	ENSG00000207133.1, ENSG00000224078.15	SNORD116-7 , SNHG14	snoRNA, lncRNA	0.983254	822	0	14	0
ZH38T0015428	Proximal	ENSG00000165417.12	GTF2A1	protein_coding	0.983248	15026	114	142	0
ZH38T0011560	Intron	ENSG00000135409.11	AMHR2	protein_coding	0.983229	1407	21	3	0
ZH38T0023255	Proximal	ENSG00000170677.6	SOCS6	protein_coding	0.983226	762	9	4	0
ZH38T0004225	Intron	ENSG00000077157.22	PPP1R12B	protein_coding	0.983213	1640	12	16	0
ZH38T0034295	Intron	ENSG00000213533.12, ENSG00000248592.7	STIMATE , STIMATE-MUSTN1	protein_coding, protein_coding	0.983213	820	4	10	0
ZH38T0000530	Proximal	ENSG00000074964.17	ARHGEF10L	protein_coding	0.983146	350	2	4	0
ZH38T0022332	Proximal	ENSG00000224877.4	NDUFAF8	protein_coding	0.983112	2445	8	34	0
ZH38T0051451	Proximal	ENSG00000101945.16	SUV39H1	protein_coding	0.983112	7102	114	8	0
ZH38T0008291	Intron	ENSG00000175220.12	ARHGAP1	protein_coding	0.983099	1047	8	10	0
ZH38T0009977	Proximal	ENSG00000149428.19	HYOU1	protein_coding	0.983088	18718	77	245	0
ZH38T0021164	Proximal	ENSG00000108312.15	UBTF	protein_coding	0.983068	59800	230	800	0
ZH38T0040593	Intron	ENSG00000171992.13	SYNPO	protein_coding	0.98304	6028	0	104	0
ZH38T0032848	Intron	ENSG00000100201.21	DDX17	protein_coding	0.983036	22310	0	385	0
ZH38T0016140	Exon	ENSG00000169926.11	KLF13	protein_coding	0.98301	2835	0	49	0
ZH38T0047071	Proximal	ENSG00000198791.12	CNOT7	protein_coding	0.983008	6942	60	60	0
ZH38T0051625	Intron	ENSG00000131089.15	ARHGEF9	protein_coding	0.983001	76503	168	1155	0
ZH38T0027155	Proximal	ENSG00000119888.10	EPCAM	protein_coding	0.982988	16988	242	52	0
ZH38T0050821	Proximal	ENSG00000169583.12	CLIC3	protein_coding	0.982984	20103	76	272	0
ZH38T0041032	Proximal	ENSG00000169223.15	LMAN2	protein_coding	0.982964	1154	2	18	0
ZH38T0021343	Intron	ENSG00000260027.4	HOXB7	protein_coding	0.982906	575	0	10	0
ZH38T0009684	Intron	ENSG00000178105.11	DDX10	protein_coding	0.982878	4248	36	38	0
ZH38T0009968	Proximal	ENSG00000118181.11	RPS25	protein_coding	0.982869	12852	96	128	0
ZH38T0029981	Proximal	ENSG00000182600.9	SNORC	protein_coding	0.982843	401	0	7	0
ZH38T0050535	Intergenic	ENSG00000160445.11	ZER1	protein_coding	0.982827	744	3	10	0
ZH38T0001546	Intron	ENSG00000085832.17	EPS15	protein_coding	0.982806	54760	28	930	0
ZH38T0020623	Proximal	ENSG00000176658.17	MYO1D	protein_coding	0.982804	8916	102	54	0
ZH38T0044891	Intron	ENSG00000122545.19	2021-09-07	protein_coding	0.98279	8223	105	39	0
ZH38T0022187	Intron	ENSG00000184640.18	2021-09-09	protein_coding	0.982759	3591	9	54	0
ZH38T0022359	Intron	ENSG00000184009.12	ACTG1	protein_coding	0.982716	398	1	6	0
ZH38T0019018	Intron	ENSG00000140932.10	CMTM2	protein_coding	0.982713	1478	8	18	0
ZH38T0023973	Intron	ENSG00000197256.10	KANK2	protein_coding	0.982696	5395	4	91	0
ZH38T0026082	Proximal	ENSG00000105048.17	TNNT1	protein_coding	0.982694	7836	120	18	0
ZH38T0044642	Proximal	ENSG00000136244.12	IL6	protein_coding	0.982685	17594	300	10	0
ZH38T0002965	Proximal	ENSG00000163191.6	S100A11	protein_coding	0.982684	454	0	8	0
ZH38T0021137	Proximal	ENSG00000261514.1	LINC01976	lncRNA	0.982628	1301	18	5	0
ZH38T0021245	Proximal	ENSG00000120071.14	KANSL1	protein_coding	0.982609	339	0	6	0
ZH38T0034262	Intron	ENSG00000114854.7	TNNC1	protein_coding	0.982597	734	0	13	0
ZH38T0015890	Proximal	ENSG00000211890.4	IGHA2	IG_C_gene	0.982571	451	3	5	0
ZH38T0051134	Proximal	ENSG00000147003.7	CLTRN	protein_coding	0.982562	1634	14	15	0
ZH38T0042560	Proximal	ENSG00000112559.14	MDFI	protein_coding	0.98254	2476	16	28	0
ZH38T0025672	Proximal	ENSG00000142534.7	RPS11	protein_coding	0.982493	37207	15	648	0
ZH38T0048372	TSS	ENSG00000147677.11, ENSG00000164754.14	EIF3H , RAD21	protein_coding, protein_coding	0.982476	21641	305	81	0
ZH38T0017279	Proximal	ENSG00000086666.19	ZFAND6	protein_coding	0.982476	117060	2052	36	0
ZH38T0036347	Intron	ENSG00000215375.6	MYL5	protein_coding	0.982472	8744	0	156	0
ZH38T0032234	Proximal	ENSG00000099901.17	RANBP1	protein_coding	0.982456	840	6	9	0
ZH38T0046551	Intron	ENSG00000064393.16	HIPK2	protein_coding	0.982456	560	0	10	0
ZH38T0031762	Proximal	ENSG00000159200.18	RCAN1	protein_coding	0.982446	4869	6	81	0
ZH38T0024169	Intergenic	ENSG00000187556.7	NANOS3	protein_coding	0.982434	2293	35	6	0
ZH38T0028013	Proximal	ENSG00000071073.13	MGAT4A	protein_coding	0.982428	2460	42	2	0
ZH38T0026087	Proximal	ENSG00000129991.13	TNNI3	protein_coding	0.982428	10902	120	75	0
ZH38T0040091	Proximal	ENSG00000072364.13	AFF4	protein_coding	0.982394	37608	346	328	0
ZH38T0022606	Intron	ENSG00000173482.16	PTPRM	protein_coding	0.982339	50504	852	56	0
ZH38T0024024	Proximal	ENSG00000102575.12	ACP5	protein_coding	0.982311	4165	65	10	0
ZH38T0047187	Intergenic	ENSG00000168453.15	HR	protein_coding	0.98231	944	0	17	0
ZH38T0051942	Proximal	ENSG00000133134.11	BEX2	protein_coding	0.982278	2328	0	42	0
ZH38T0024327	Intergenic	ENSG00000130303.13	BST2	protein_coding	0.982278	1164	21	0	0
ZH38T0051106	Intron	ENSG00000046651.15	OFD1	protein_coding	0.982252	13504	64	180	0
ZH38T0035900	Proximal	ENSG00000171109.19	MFN1	protein_coding	0.982249	3984	46	26	0
ZH38T0020779	Proximal	ENSG00000161381.14	PLXDC1	protein_coding	0.982186	2426	30	14	0
ZH38T0027988	Intron	ENSG00000168754.15	FAM178B	protein_coding	0.982155	5834	36	70	0
ZH38T0047872	Proximal	ENSG00000147604.14	RPL7	protein_coding	0.982154	6164	28	84	0
ZH38T0010852	Proximal	ENSG00000111348.9	ARHGDIB	protein_coding	0.982143	4620	22	62	0
ZH38T0037831	Intron	ENSG00000170917.13	NUDT6	protein_coding	0.982143	1100	12	8	0
ZH38T0014285	Exon	ENSG00000173464.14, ENSG00000259060.7	RNASE11 , AL163195.3	protein_coding, protein_coding	0.982143	165	1	2	0
ZH38T0033617	Proximal	ENSG00000033867.16	SLC4A7	protein_coding	0.982115	30366	399	154	0
ZH38T0000188	Proximal	ENSG00000097021.19	ACOT7	protein_coding	0.982085	1206	14	8	0
ZH38T0003861	Intron	ENSG00000116194.13	ANGPTL1	protein_coding	0.982072	21637	24	371	0
ZH38T0004185	Proximal	ENSG00000159176.14	CSRP1	protein_coding	0.982056	3448	23	40	0
ZH38T0006866	Intron	ENSG00000065613.14	SLK	protein_coding	0.981993	4908	26	64	0
ZH38T0051460	Intron	ENSG00000094631.20	HDAC6	protein_coding	0.981951	23013	153	270	0
ZH38T0045860	Intron	ENSG00000087087.20	SRRT	protein_coding	0.981938	2392	0	44	0
ZH38T0024163	Intron	ENSG00000132003.9	ZSWIM4	protein_coding	0.981928	326	0	6	0
ZH38T0047711	Proximal	ENSG00000254139.1	AC104051.2	lncRNA	0.981884	813	1	14	0
ZH38T0001307	Proximal	ENSG00000065978.19	YBX1	protein_coding	0.981881	7966	128	19	0
ZH38T0024762	Intron	ENSG00000075702.18	WDR62	protein_coding	0.981859	1732	14	18	0
ZH38T0028809	Intron	ENSG00000115290.9	GRB14	protein_coding	0.981851	1623	14	16	0
ZH38T0002010	Intron	ENSG00000171502.15	COL24A1	protein_coding	0.981818	216	0	4	0
ZH38T0008367	Proximal	ENSG00000149136.9	SSRP1	protein_coding	0.981809	3886	8	64	0
ZH38T0042706	Proximal	ENSG00000112759.18	SLC29A1	protein_coding	0.981794	184431	3291	129	0
ZH38T0018788	Proximal	ENSG00000102935.11	ZNF423	protein_coding	0.981758	1776	3	30	0
ZH38T0027855	Proximal	ENSG00000211592.8, ENSG00000243466.1	IGKC , IGKV1-5	IG_C_gene, IG_V_gene	0.981754	20446	61	319	0
ZH38T0030802	Proximal	ENSG00000125995.16	ROMO1	protein_coding	0.981725	4781	5	84	0
ZH38T0019836	Proximal	ENSG00000129250.12	KIF1C	protein_coding	0.98171	12989	50	192	0
ZH38T0005865	Intron	ENSG00000188611.15	ASAH2	protein_coding	0.981707	483	5	4	0
ZH38T0003036	Intron	ENSG00000197956.10	S100A6	protein_coding	0.981685	10452	0	195	0
ZH38T0036557	Proximal	ENSG00000250896.1	RNPS1P1	processed_pseudogene	0.981663	803	15	0	0
ZH38T0042345	Intron	ENSG00000096433.11	ITPR3	protein_coding	0.981651	2140	4	36	0
ZH38T0047333	Proximal	ENSG00000120885.21	CLU	protein_coding	0.981611	10089	27	162	0
ZH38T0033030	Proximal	ENSG00000184983.10	NDUFA6	protein_coding	0.981584	1013033	3081	15925	0
ZH38T0039315	Proximal	ENSG00000134057.15	CCNB1	protein_coding	0.981575	586	4	7	0
ZH38T0023532	Proximal	ENSG00000095932.6	SMIM24	protein_coding	0.981542	2712	0	51	0
ZH38T0020048	Intron	ENSG00000170004.16	CHD3	protein_coding	0.981518	5470	19	84	0
ZH38T0032340	Proximal	ENSG00000211660.3, ENSG00000211677.2, ENSG00000211679.2, ENSG00000254709.7	IGLV2-23 , IGLC2 , IGLC3 , IGLL5	IG_V_gene, IG_C_gene, IG_C_gene, protein_coding	0.981503	22499	25	397	2
ZH38T0017785	Proximal	ENSG00000059145.18	UNKL	protein_coding	0.9815	14112	146	120	0
ZH38T0041864	Proximal	ENSG00000197279.4	ZNF165	protein_coding	0.981475	2861	40	14	0
ZH38T0021832	Exon	ENSG00000214174.8	AMZ2P1	transcribed_unprocessed_pseudogene	0.981458	4658	74	14	0
ZH38T0036169	Proximal	ENSG00000152492.15	CCDC50	protein_coding	0.981444	28878	346	200	0
ZH38T0008121	Proximal	ENSG00000186714.12	CCDC73	protein_coding	0.981432	740	4	10	0
ZH38T0044432	Proximal	ENSG00000008256.16	CYTH3	protein_coding	0.981418	13838	218	44	0
ZH38T0040930	Proximal	ENSG00000037241.7	RPL26L1	protein_coding	0.981405	1900	4	32	0
ZH38T0024570	Proximal	ENSG00000105186.16	ANKRD27	protein_coding	0.981399	2638	40	10	0
ZH38T0029041	Proximal	ENSG00000116044.16	NFE2L2	protein_coding	0.981396	60348	480	664	0
ZH38T0030755	Proximal	ENSG00000242372.8	EIF6	protein_coding	0.981364	27963	108	423	0
ZH38T0016294	Proximal	ENSG00000140319.10	SRP14	protein_coding	0.981356	45900	24	848	0
ZH38T0047334	Proximal	ENSG00000120885.21	CLU	protein_coding	0.981352	292905	2507	3058	1
ZH38T0018816	Intron	ENSG00000260963.2	AC026462.3	lncRNA	0.981338	6100	51	65	0
ZH38T0036921	Proximal	ENSG00000163069.12	SGCB	protein_coding	0.981336	108891	2069	2	0
ZH38T0031874	Intron	ENSG00000185437.13, ENSG00000285815.1	SH3BGR , WRB-SH3BGR	protein_coding, protein_coding	0.981308	3150	42	18	0
ZH38T0015434	Intron	ENSG00000140022.13	STON2	protein_coding	0.981308	840	4	12	0
ZH38T0021272	Proximal	ENSG00000108424.10	KPNB1	protein_coding	0.981303	13436	153	103	0
ZH38T0034278	Intron	ENSG00000163939.18	PBRM1	protein_coding	0.981281	996	4	15	0
ZH38T0028565	Intron	ENSG00000075884.14	ARHGAP15	protein_coding	0.981273	262	4	1	0
ZH38T0024053	Proximal	ENSG00000196466.10, ENSG00000268744.1	ZNF799 , AC008758.4	protein_coding, lncRNA	0.981259	5236	44	56	0
ZH38T0011904	Intron	ENSG00000135506.16	OS9	protein_coding	0.981219	47020	690	210	0
ZH38T0049984	Proximal	ENSG00000136938.9	ANP32B	protein_coding	0.981158	12289	102	134	0
ZH38T0000800	Intron	ENSG00000142675.18	CNKSR1	protein_coding	0.981132	2184	21	21	0
ZH38T0020809	Intron	ENSG00000131771.14	PPP1R1B	protein_coding	0.981087	2075	5	35	0
ZH38T0017939	Proximal	ENSG00000103145.10	HCFC1R1	protein_coding	0.981069	12023	0	232	0
ZH38T0052160	Intron	ENSG00000125351.11	UPF3B	protein_coding	0.981066	1969	0	38	0
ZH38T0037499	Intron	ENSG00000163110.15	PDLIM5	protein_coding	0.981061	1554	0	30	0
ZH38T0048764	Intron	ENSG00000178209.15	PLEC	protein_coding	0.981058	22633	60	377	0
ZH38T0013980	Intron	ENSG00000139793.18	MBNL2	protein_coding	0.981043	1656	0	32	0
ZH38T0045723	Proximal	ENSG00000106246.17	PTCD1	protein_coding	0.981031	34755	63	609	0
ZH38T0051616	Proximal	ENSG00000204272.12	NBDY	protein_coding	0.981027	26835	354	165	0
ZH38T0013351	Intron	ENSG00000132965.9	ALOX5AP	protein_coding	0.981013	1860	8	28	0
ZH38T0040275	Intron	ENSG00000171604.12	CXXC5	protein_coding	0.980966	1340	0	26	0
ZH38T0008622	Proximal	ENSG00000124942.14	AHNAK	protein_coding	0.980946	39950	222	554	0
ZH38T0021506	Proximal	ENSG00000154945.7	ANKRD40	protein_coding	0.980909	1079	4	17	0
ZH38T0049895	Intron	ENSG00000197724.11	PHF2	protein_coding	0.98088	1539	0	30	0
ZH38T0025880	Proximal	ENSG00000105379.9, ENSG00000269403.1	ETFB , AC008750.8	protein_coding, protein_coding	0.980844	357697	960	6026	0
ZH38T0008955	Proximal	ENSG00000175550.8	DRAP1	protein_coding	0.980832	2405	0	47	0
ZH38T0000708	Intron	ENSG00000011009.11	LYPLA2	protein_coding	0.980806	4088	24	56	0
ZH38T0038600	TSS	ENSG00000180104.16	EXOC3	protein_coding	0.98079	919	6	12	0
ZH38T0008907	Intron	ENSG00000168056.16	LTBP3	protein_coding	0.980775	9234	0	181	0
ZH38T0000356	Proximal	ENSG00000116670.15	MAD2L2	protein_coding	0.980701	5793	111	3	0
ZH38T0030674	Proximal	ENSG00000101337.15	TM9SF4	protein_coding	0.980684	4874	8	88	0
ZH38T0010191	Intron	ENSG00000120457.12	KCNJ5	protein_coding	0.980676	406	0	8	0
ZH38T0017345	Proximal	ENSG00000064726.9	BTBD1	protein_coding	0.980646	12566	232	16	0
ZH38T0032067	Intron	ENSG00000142156.14	COL6A1	protein_coding	0.980618	11232	216	6	0
ZH38T0036190	Intron	ENSG00000198836.10	OPA1	protein_coding	0.980609	10620	20	190	0
ZH38T0028075	Intron	ENSG00000158435.8	CNOT11	protein_coding	0.980605	5157	21	81	0
ZH38T0047194	Intron	ENSG00000168490.14	PHYHIP	protein_coding	0.980591	2324	0	46	0
ZH38T0048814	Intron	ENSG00000160948.14, ENSG00000160949.17	VPS28 , TONSL	protein_coding, protein_coding	0.980545	252	0	5	0
ZH38T0041913	Proximal	ENSG00000213886.3	UBD	protein_coding	0.98054	5341	26	80	0
ZH38T0051709	Proximal	ENSG00000147130.14	ZMYM3	protein_coding	0.98051	19369	63	322	0
ZH38T0045679	Intron	ENSG00000231764.9	DLX6-AS1	lncRNA	0.980488	1608	6	24	2
ZH38T0045817	Proximal	ENSG00000160813.7	PPP1R35	protein_coding	0.980467	1807	0	36	0
ZH38T0021650	Proximal	ENSG00000182628.13	SKA2	protein_coding	0.980457	23178	66	396	0
ZH38T0030806	Intron	ENSG00000131051.23	RBM39	protein_coding	0.980435	1353	3	24	0
ZH38T0018831	Proximal	ENSG00000166971.17	AKTIP	protein_coding	0.980427	8265	33	132	0
ZH38T0036433	Intergenic	ENSG00000159788.19	RGS12	protein_coding	0.980417	8411	168	0	0
ZH38T0013261	Proximal	ENSG00000132932.17	ATP8A2	protein_coding	0.980411	1001	20	0	0
ZH38T0046946	Proximal	ENSG00000171711.2	DEFB4A	protein_coding	0.980408	3603	21	51	0
ZH38T0039158	Proximal	ENSG00000062194.16	GPBP1	protein_coding	0.980392	2800	0	56	0
ZH38T0027740	Proximal	ENSG00000034510.6	TMSB10	protein_coding	0.980353	48252	0	967	0
ZH38T0026077	Proximal	ENSG00000105048.17	TNNT1	protein_coding	0.980326	12258	232	14	0
ZH38T0007328	Intron	ENSG00000023191.17	RNH1	protein_coding	0.980298	61649	1183	56	0
ZH38T0012341	Proximal	ENSG00000120833.14	SOCS2	protein_coding	0.980293	64417	6	1289	0
ZH38T0025703	Intron	ENSG00000126457.21, ENSG00000224420.3	PRMT1 , ADM5	protein_coding, protein_coding	0.980271	3180	0	64	0
ZH38T0037764	Intron	ENSG00000172399.5	MYOZ2	protein_coding	0.980237	248	0	5	0
ZH38T0018378	TSS	ENSG00000237296.9	SMG1P1	transcribed_unprocessed_pseudogene	0.980225	6543	114	17	1
ZH38T0004757	Proximal	ENSG00000163041.11	H3F3A	protein_coding	0.980222	16653	0	336	0
ZH38T0003865	Proximal	ENSG00000116199.12	FAM20B	protein_coding	0.980207	4259	86	0	0
ZH38T0004171	Proximal	ENSG00000159166.14	LAD1	protein_coding	0.980201	47428	204	754	0
ZH38T0020672	Proximal	ENSG00000270885.1	RASL10B	protein_coding	0.980153	642	12	1	0
ZH38T0052150	Proximal	ENSG00000077721.16	UBE2A	protein_coding	0.980135	58220	282	898	0
ZH38T0051575	Intergenic	ENSG00000196632.10	WNK3	protein_coding	0.980127	2466	2	48	0
ZH38T0025625	Proximal	ENSG00000177380.14	PPFIA3	protein_coding	0.980123	1430	16	13	0
ZH38T0050519	Intron	ENSG00000119333.11	WDR34	protein_coding	0.980102	2315	1	46	0
ZH38T0006084	Proximal	ENSG00000172731.14	LRRC20	protein_coding	0.9801	788	16	0	0
ZH38T0040243	Proximal	ENSG00000015479.18	MATR3	protein_coding	0.98008	263225	2475	2875	0
ZH38T0038497	Proximal	ENSG00000109771.15	LRP2BP	protein_coding	0.980077	1525	10	21	0
ZH38T0020753	Proximal	ENSG00000277972.1	CISD3	protein_coding	0.980076	14019	66	219	0
ZH38T0023644	Intergenic	ENSG00000105426.16	PTPRS	protein_coding	0.980073	5361	107	2	0
ZH38T0005823	Intron	ENSG00000150175.13	FRMPD2B	unprocessed_pseudogene	0.980057	344	6	1	0
ZH38T0028887	Intron	ENSG00000138385.16	SSB	protein_coding	0.980042	11294	34	196	0
ZH38T0008625	Intergenic	ENSG00000124942.14	AHNAK	protein_coding	0.980036	2160	6	38	0
ZH38T0047339	Proximal	ENSG00000171320.14	ESCO2	protein_coding	0.980027	42688	220	650	0
ZH38T0036410	Proximal	ENSG00000168884.14	TNIP2	protein_coding	0.980007	17352	294	60	0
ZH38T0004202	Proximal	ENSG00000198892.6	SHISA4	protein_coding	0.979962	1565	8	24	0
ZH38T0006520	Proximal	ENSG00000138207.14	RBP4	protein_coding	0.979949	6891	0	141	0
ZH38T0011682	Proximal	ENSG00000135404.11	CD63	protein_coding	0.979915	3153513	9220	55367	50
ZH38T0003765	Intron	ENSG00000197959.14	DNM3	protein_coding	0.979876	3165	35	30	0
ZH38T0035709	Proximal	ENSG00000113810.16	SMC4	protein_coding	0.979839	2916	20	40	0
ZH38T0030753	Proximal	ENSG00000126005.17, ENSG00000261582.1	MMP24OS , AL121753.1	protein_coding, protein_coding	0.979836	5734	38	80	0
ZH38T0040504	Intron	ENSG00000164265.9	SCGB3A2	protein_coding	0.97981	825	7	10	0
ZH38T0046019	Proximal	ENSG00000008282.8	SYPL1	protein_coding	0.979807	23145	465	12	0
ZH38T0024122	Proximal	ENSG00000179271.3	GADD45GIP1	protein_coding	0.979806	2329	21	27	0
ZH38T0010140	Proximal	ENSG00000198331.10	HYLS1	protein_coding	0.979788	35388	494	236	0
ZH38T0000852	Proximal	ENSG00000142784.16	WDTC1	protein_coding	0.979779	2132	42	2	0
ZH38T0049989	Intron	ENSG00000136938.9	ANP32B	protein_coding	0.979777	1405	0	29	0
ZH38T0048630	Intron	ENSG00000104472.10	CHRAC1	protein_coding	0.979775	2616	18	36	0
ZH38T0001026	Proximal	ENSG00000162520.14	SYNC	protein_coding	0.97976	2614	2	52	0
ZH38T0044352	Proximal	ENSG00000106263.18	EIF3B	protein_coding	0.97973	870	8	10	0
ZH38T0022638	Proximal	ENSG00000101558.13	VAPA	protein_coding	0.979664	189036	2790	1130	4
ZH38T0014733	Proximal	ENSG00000100941.9	PNN	protein_coding	0.979661	578	0	12	0
ZH38T0028016	Proximal	ENSG00000226791.7	LINC02611	lncRNA	0.979633	2886	0	60	0
ZH38T0029787	Intron	ENSG00000114923.17	SLC4A3	protein_coding	0.979592	1728	0	36	0
ZH38T0026100	Intron	ENSG00000080031.10	AC010327.1	protein_coding	0.979547	14368	104	196	0
ZH38T0035794	Proximal	ENSG00000171757.15	LRRC34	protein_coding	0.979545	12786	153	114	0
ZH38T0001741	Intron	ENSG00000230798.5	FOXD3-AS1	lncRNA	0.979532	335	0	7	0
ZH38T0044130	Intron	ENSG00000197081.14	IGF2R	protein_coding	0.979522	574	4	8	0
ZH38T0024262	Intron	ENSG00000167460.17	TPM4	protein_coding	0.979503	102505	635	1510	0
ZH38T0045248	Intron	ENSG00000126522.16	ASL	protein_coding	0.979487	1528	12	20	0
ZH38T0044619	Intron	ENSG00000105877.18	DNAH11	protein_coding	0.979452	3861	21	60	0
ZH38T0014219	Intron	ENSG00000150403.18	TMCO3	protein_coding	0.979452	2574	30	24	0
ZH38T0049759	Proximal	ENSG00000135052.16	GOLM1	protein_coding	0.979446	11818	244	2	2
ZH38T0049073	Intron	ENSG00000044459.15	CNTLN	protein_coding	0.979442	1334	4	24	0
ZH38T0029233	Intron	ENSG00000128641.19	MYO1B	protein_coding	0.979431	17856	261	114	0
ZH38T0003357	Intron	ENSG00000143321.19	HDGF	protein_coding	0.979424	4760	72	28	0
ZH38T0043151	Intron	ENSG00000111880.16	RNGTT	protein_coding	0.979412	1332	2	26	0
ZH38T0047681	Proximal	ENSG00000120992.18	LYPLA1	protein_coding	0.97941	8800	175	10	0
ZH38T0010638	Intron	ENSG00000111752.11	PHC1	protein_coding	0.979396	1426	18	12	0
ZH38T0039127	Proximal	ENSG00000067113.17	PLPP1	protein_coding	0.979382	79326	816	854	0
ZH38T0048078	Proximal	ENSG00000188343.12	FAM92A	protein_coding	0.979351	1328	4	24	0
ZH38T0028249	Intergenic	ENSG00000125637.15	PSD4	protein_coding	0.979334	853	6	12	0
ZH38T0016315	Intron	ENSG00000233041.8	PHGR1	protein_coding	0.979315	1515	2	30	0
ZH38T0003054	Proximal	ENSG00000188643.11	S100A16	protein_coding	0.979253	236	0	5	0
ZH38T0024255	Proximal	ENSG00000167460.17	TPM4	protein_coding	0.979215	6360	6	129	0
ZH38T0006796	Intron	ENSG00000107874.11	CUEDC2	protein_coding	0.979187	988	10	11	0
ZH38T0047484	Proximal	ENSG00000085788.13	DDHD2	protein_coding	0.979174	16362	208	140	0
ZH38T0035538	Intergenic	ENSG00000144893.12	MED12L	protein_coding	0.979167	2068	18	26	0
ZH38T0030728	Proximal	ENSG00000125971.16	DYNLRB1	protein_coding	0.979101	3748	11	69	0
ZH38T0036885	Intron	ENSG00000170448.12	NFXL1	protein_coding	0.979093	2201	0	47	0
ZH38T0033238	Proximal	ENSG00000100253.13	MIOX	protein_coding	0.979058	1122	6	18	0
ZH38T0031740	Intron	ENSG00000205726.15	ITSN1	protein_coding	0.979053	37532	572	231	0
ZH38T0031312	Proximal	ENSG00000215440.12	NPEPL1	protein_coding	0.97903	15080	179	144	0
ZH38T0029970	Proximal	ENSG00000135930.14	EIF4E2	protein_coding	0.979024	35938	147	623	0
ZH38T0033396	Proximal	ENSG00000157017.15	GHRL	protein_coding	0.979008	513	1	10	0
ZH38T0021825	Proximal	ENSG00000215769.8	ARHGAP27P1-BPTFP1-KPNA2P3	lncRNA	0.978947	4278	62	30	0
ZH38T0052255	Intron	ENSG00000147255.19	IGSF1	protein_coding	0.978947	3348	0	72	0
ZH38T0014117	Proximal	ENSG00000134871.18	COL4A2	protein_coding	0.978934	6831	45	102	0
ZH38T0041189	Proximal	ENSG00000196670.13	ZFP62	protein_coding	0.978917	3436	18	56	0
ZH38T0024883	Intron	ENSG00000099341.11	PSMD8	protein_coding	0.978915	4782	10	93	0
ZH38T0002370	Proximal	ENSG00000134255.14	CEPT1	protein_coding	0.978893	12522	178	92	0
ZH38T0047330	TSS	ENSG00000120885.21	CLU	protein_coding	0.978863	2084	6	39	0
ZH38T0041931	Proximal	ENSG00000204642.14	HLA-F	protein_coding	0.978858	1852	8	32	0
ZH38T0052314	Intron	ENSG00000228836.8, ENSG00000269586.7	CT45A5 , CT45A10	protein_coding, protein_coding	0.978805	2032	4	40	0
ZH38T0042267	Intron	ENSG00000204256.13	BRD2	protein_coding	0.978799	2216	0	48	0
ZH38T0002793	Intron	ENSG00000014914.21	MTMR11	protein_coding	0.978799	2216	2	46	0
ZH38T0030175	Proximal	ENSG00000115677.17	HDLBP	protein_coding	0.978746	152976	2868	454	0
ZH38T0009071	Intron	ENSG00000132744.8, ENSG00000167800.9	ACY3 , TBX10	protein_coding, protein_coding	0.978669	2294	30	20	0
ZH38T0005300	Proximal	ENSG00000048740.18	CELF2	protein_coding	0.978644	78088	1592	112	0
ZH38T0037678	Intron	ENSG00000164093.17	PITX2	protein_coding	0.978571	3836	0	84	0
ZH38T0025692	Proximal	ENSG00000126464.14	PRR12	protein_coding	0.978541	1368	9	21	0
ZH38T0025718	Proximal	ENSG00000104960.15	PTOV1	protein_coding	0.978489	9780	180	35	0
ZH38T0021775	Intron	ENSG00000108604.15	SMARCD2	protein_coding	0.978448	908	0	20	0
ZH38T0004294	Intron	ENSG00000058668.14	ATP2B4	protein_coding	0.978407	10784	24	214	0
ZH38T0016090	Proximal	ENSG00000186297.12	GABRA5	protein_coding	0.978368	4749	81	24	0
ZH38T0022247	Proximal	ENSG00000035862.12	TIMP2	protein_coding	0.978357	2667	8	51	0
ZH38T0026079	Proximal	ENSG00000105048.17	TNNT1	protein_coding	0.978311	1714	36	2	0
ZH38T0015912	TSS	ENSG00000211890.4, ENSG00000211892.4, ENSG00000211893.4, ENSG00000211895.5, ENSG00000211896.7, ENSG00000211897.9, ENSG00000211898.7, ENSG00000211899.10	IGHA2 , IGHG4 , IGHG2 , IGHA1 , IGHG1 , IGHG3 , IGHD , IGHM	IG_C_gene, IG_C_gene, IG_C_gene, IG_C_gene, IG_C_gene, IG_C_gene, IG_C_gene, IG_C_gene	0.97829	2884	11	53	0
ZH38T0000072	Proximal	ENSG00000248333.8	CDK11B	protein_coding	0.978267	20796	144	318	0
ZH38T0023918	Proximal	ENSG00000065989.16	PDE4A	protein_coding	0.978193	314	3	4	0
ZH38T0046366	Intron	ENSG00000158525.15	CPA5	protein_coding	0.978188	1749	0	39	0
ZH38T0018231	Intron	ENSG00000133392.18	MYH11	protein_coding	0.978181	38556	688	172	0
ZH38T0018958	Intron	ENSG00000070761.8	CFAP20	protein_coding	0.978175	493	0	11	0
ZH38T0002804	Proximal	ENSG00000023902.14	PLEKHO1	protein_coding	0.978163	3046	56	12	0
ZH38T0042649	Proximal	ENSG00000112655.16	PTK7	protein_coding	0.978136	19103	133	294	0
ZH38T0003374	Intron	ENSG00000187800.13	PEAR1	protein_coding	0.978134	1342	0	30	0
ZH38T0024348	Intron	ENSG00000105642.15	KCNN1	protein_coding	0.978125	626	9	5	0
ZH38T0007330	Proximal	ENSG00000023191.17	RNH1	protein_coding	0.978102	7504	70	98	0
ZH38T0000151	Proximal	ENSG00000078900.15	TP73	protein_coding	0.978102	670	4	11	0
ZH38T0017055	Intron	ENSG00000067225.18	PKM	protein_coding	0.978095	16432	64	304	0
ZH38T0045443	TSS	ENSG00000234456.8	MAGI2-AS3	lncRNA	0.978086	10087	208	18	0
ZH38T0009242	Intron	ENSG00000021300.14	PLEKHB1	protein_coding	0.978081	12048	30	240	0
ZH38T0051496	Intergenic	ENSG00000101951.16	PAGE4	protein_coding	0.978053	1025	20	3	0
ZH38T0047823	Intron	ENSG00000165084.16	C8orf34	protein_coding	0.977941	798	6	12	0
ZH38T0003503	Intron	ENSG00000158764.7	ITLN2	protein_coding	0.977848	309	4	3	0
ZH38T0050460	Proximal	ENSG00000106992.19	AK1	protein_coding	0.977759	4748	52	56	0
ZH38T0001427	Intergenic	ENSG00000117450.14	PRDX1	protein_coding	0.977753	9493	28	188	0
ZH38T0004579	Intron	ENSG00000143499.14	SMYD2	protein_coding	0.977679	438	6	4	0
ZH38T0034384	Intron	ENSG00000168306.13	ACOX2	protein_coding	0.977667	3152	26	46	0
ZH38T0042200	Proximal	ENSG00000213676.13	ATF6B	protein_coding	0.977658	7614	93	81	0
ZH38T0047090	Proximal	ENSG00000129422.14	MTUS1	protein_coding	0.977612	1179	16	11	0
ZH38T0032233	Proximal	ENSG00000099901.17	RANBP1	protein_coding	0.977594	2487	15	42	0
ZH38T0045030	Proximal	ENSG00000106624.11	AEBP1	protein_coding	0.977546	15673	2	358	0
ZH38T0030550	Intron	ENSG00000088970.16	KIZ	protein_coding	0.977528	522	0	12	0
ZH38T0013862	Intron	ENSG00000136153.20	LMO7	protein_coding	0.977471	11454	12	252	0
ZH38T0019817	Proximal	ENSG00000108518.7	PFN1	protein_coding	0.977431	1126	0	26	0
ZH38T0019697	Proximal	ENSG00000262664.3	OVCA2	protein_coding	0.9774	7525	23	151	0
ZH38T0041535	Proximal	ENSG00000050393.11	MCUR1	protein_coding	0.977399	4930	50	64	0
ZH38T0025234	Proximal	ENSG00000105767.3	CADM4	protein_coding	0.977395	1816	33	9	0
ZH38T0038476	Proximal	ENSG00000151726.14	ACSL1	protein_coding	0.977318	65450	881	638	0
ZH38T0010167	TSS	ENSG00000149571.12, ENSG00000254938.1	KIRREL3 , AP002833.1	protein_coding, lncRNA	0.977314	1077	13	11	1
ZH38T0045182	Intron	ENSG00000146733.14	PSPH	protein_coding	0.977273	344	8	0	0
ZH38T0027018	Intron	ENSG00000163214.21	DHX57	protein_coding	0.977273	258	1	5	0
ZH38T0032339	Proximal	ENSG00000211660.3	IGLV2-23	IG_V_gene	0.977273	215	0	5	0
ZH38T0024518	Intron	ENSG00000197372.9	ZNF675	protein_coding	0.977273	129	0	3	0
ZH38T0034478	Proximal	ENSG00000144747.17	TMF1	protein_coding	0.977266	9672	3	222	0
ZH38T0048894	Proximal	ENSG00000080503.24	SMARCA2	protein_coding	0.97725	23712	496	56	0
ZH38T0007180	Proximal	ENSG00000065154.11	OAT	protein_coding	0.977237	2490	12	46	0
ZH38T0000020	Intron	ENSG00000187642.9, ENSG00000188976.11	PERM1 , NOC2L	protein_coding, protein_coding	0.977134	1282	4	26	0
ZH38T0051740	Proximal	ENSG00000102309.14	PIN4	protein_coding	0.977117	5978	49	91	0
ZH38T0019389	Proximal	ENSG00000197943.10	PLCG2	protein_coding	0.977026	1531	35	1	0
ZH38T0013859	Intron	ENSG00000136153.20, ENSG00000261553.5	LMO7 , AL137782.1	protein_coding, lncRNA	0.976968	126237	91	2885	0
ZH38T0009109	Intron	ENSG00000197345.13	MRPL21	protein_coding	0.976959	636	0	15	0
ZH38T0050272	Intron	ENSG00000136861.18	CDK5RAP2	protein_coding	0.976955	7122	93	75	0
ZH38T0017733	Intron	ENSG00000090565.16	RAB11FIP3	protein_coding	0.976948	2458	26	32	0
ZH38T0026318	Proximal	ENSG00000189292.16	ALKAL2	protein_coding	0.976923	10160	155	85	0
ZH38T0005896	Proximal	ENSG00000285958.1	AC073174.1	lncRNA	0.976923	254	0	6	0
ZH38T0017735	Intron	ENSG00000090565.16	RAB11FIP3	protein_coding	0.976887	9552	136	90	0
ZH38T0030153	Intron	ENSG00000115687.13	PASK	protein_coding	0.976879	1352	8	24	0
ZH38T0027543	Intron	ENSG00000124374.9	PAIP2B	protein_coding	0.976862	6375	84	67	0
ZH38T0030541	Intron	ENSG00000089101.18	CFAP61	protein_coding	0.97686	591	0	14	0
ZH38T0025983	Proximal	ENSG00000179820.16	MYADM	protein_coding	0.97683	18339	0	435	0
ZH38T0013205	Intron	ENSG00000102678.6	FGF9	protein_coding	0.976825	5353	99	28	0
ZH38T0020292	Intron	ENSG00000171953.16	ATPAF2	protein_coding	0.976789	1010	6	18	0
ZH38T0025734	Intron	ENSG00000104951.16, ENSG00000213024.11, ENSG00000269179.1	IL4I1 , NUP62 , AC011452.1	protein_coding, protein_coding, protein_coding	0.97677	7064	24	144	0
ZH38T0031644	Intron	ENSG00000198862.14	LTN1	protein_coding	0.976744	1134	3	24	0
ZH38T0033081	Intron	ENSG00000186976.15	EFCAB6	protein_coding	0.976744	420	2	8	0
ZH38T0045542	Intron	ENSG00000105793.15	GTPBP10	protein_coding	0.976744	336	0	8	0
ZH38T0046875	Intron	ENSG00000126870.16	WDR60	protein_coding	0.976683	2220	9	44	0
ZH38T0032348	Proximal	ENSG00000211670.2, ENSG00000211673.2, ENSG00000211677.2, ENSG00000211679.2, ENSG00000254709.7	IGLV3-9 , IGLV3-1 , IGLC2 , IGLC3 , IGLL5	IG_V_gene, IG_V_gene, IG_C_gene, IG_C_gene, protein_coding	0.976665	2302	1	54	0
ZH38T0019921	Intron	ENSG00000132535.19	DLG4	protein_coding	0.976615	4218	14	87	0
ZH38T0010407	Proximal	ENSG00000111254.8	AKAP3	protein_coding	0.976608	1503	27	9	0
ZH38T0051056	Intron	ENSG00000146950.13	SHROOM2	protein_coding	0.976601	1586	0	38	0
ZH38T0026976	Intergenic	ENSG00000115825.10	PRKD3	protein_coding	0.976593	46478	435	675	4
ZH38T0051566	Proximal	ENSG00000086758.16	HUWE1	protein_coding	0.976589	6132	143	4	0
ZH38T0046679	Proximal	ENSG00000055130.17	CUL1	protein_coding	0.97654	3663	0	88	0
ZH38T0048371	Proximal	ENSG00000164754.14	RAD21	protein_coding	0.976485	3239	58	20	0
ZH38T0042031	Proximal	ENSG00000204580.13	DDR1	protein_coding	0.976482	30103	434	291	0
ZH38T0023142	Intron	ENSG00000198796.7	ALPK2	protein_coding	0.97644	373	0	9	0
ZH38T0041974	Proximal	ENSG00000204592.9	HLA-E	protein_coding	0.976438	5346	1	128	0
ZH38T0046503	Intron	ENSG00000105894.11	PTN	protein_coding	0.976416	16312	28	366	0
ZH38T0042339	Intron	ENSG00000096433.11	ITPR3	protein_coding	0.976415	2070	6	44	0
ZH38T0028852	Proximal	ENSG00000198648.11	STK39	protein_coding	0.976401	1324	32	0	0
ZH38T0028044	Proximal	ENSG00000144218.18	AFF3	protein_coding	0.976385	3473	38	44	2
ZH38T0032570	Intron	ENSG00000183963.18	SMTN	protein_coding	0.976378	8680	0	210	0
ZH38T0043475	Intron	ENSG00000111834.12	RSPH4A	protein_coding	0.976378	372	6	3	0
ZH38T0023920	Proximal	ENSG00000079999.14	KEAP1	protein_coding	0.976358	37746	66	848	0
ZH38T0029925	Proximal	ENSG00000115053.16	NCL	protein_coding	0.976346	15272	10	360	0
ZH38T0034946	Intron	ENSG00000144837.9	PLA1A	protein_coding	0.976331	3300	8	72	0
ZH38T0049861	Intron	ENSG00000106823.12	ECM2	protein_coding	0.976324	5732	51	88	0
ZH38T0031054	Intron	ENSG00000101470.10	TNNC2	protein_coding	0.97629	7494	42	140	0
ZH38T0019719	Proximal	ENSG00000007168.13	PAFAH1B1	protein_coding	0.97629	23470	404	166	0
ZH38T0016141	Intron	ENSG00000169926.11	KLF13	protein_coding	0.97626	2015	4	45	0
ZH38T0001607	Proximal	ENSG00000081870.11	HSPB11	protein_coding	0.976253	370	1	8	0
ZH38T0047209	Proximal	ENSG00000120896.13	SORBS3	protein_coding	0.976248	8056	56	140	0
ZH38T0033733	Intron	ENSG00000076242.14	MLH1	protein_coding	0.976224	4188	48	54	0
ZH38T0002528	Intron	ENSG00000134247.10	PTGFRN	protein_coding	0.97619	123	0	3	0
ZH38T0016943	Proximal	ENSG00000174444.15, ENSG00000199574.1	RPL4 , SNORD18C	protein_coding, snoRNA	0.97619	238493	230	5587	0
ZH38T0050586	Intron	ENSG00000136878.13	USP20	protein_coding	0.976155	1965	12	36	0
ZH38T0019862	Proximal	ENSG00000108561.8	C1QBP	protein_coding	0.976152	14490	76	278	0
ZH38T0007622	Proximal	ENSG00000205531.13	NAP1L4	protein_coding	0.976135	39267	54	906	0
ZH38T0013428	Proximal	ENSG00000120693.13	SMAD9	protein_coding	0.97613	2290	48	8	0
ZH38T0002654	Intergenic	ENSG00000131788.16	PIAS3	protein_coding	0.976128	19055	85	381	0
ZH38T0007944	Intron	ENSG00000006611.16	USH1C	protein_coding	0.976119	5232	20	108	0
ZH38T0046501	Intron	ENSG00000105894.11	PTN	protein_coding	0.976096	490	0	12	0
ZH38T0022183	Exon	ENSG00000184640.18	2021-09-09	protein_coding	0.976088	15838	32	356	0
ZH38T0016840	Intron	ENSG00000103642.12	LACTB	protein_coding	0.976085	2204	10	44	0
ZH38T0011685	Proximal	ENSG00000135404.11	CD63	protein_coding	0.976084	9142	49	175	0
ZH38T0042511	Intron	ENSG00000124767.7	GLO1	protein_coding	0.976048	489	7	5	0
ZH38T0035549	Intron	ENSG00000152580.8	IGSF10	protein_coding	0.976048	163	0	4	0
ZH38T0029852	Intron	ENSG00000115009.13	CCL20	protein_coding	0.97603	4642	14	100	0
ZH38T0039392	Proximal	ENSG00000157111.13	TMEM171	protein_coding	0.976	4880	120	0	0
ZH38T0000609	Intergenic	ENSG00000127483.18	HP1BP3	protein_coding	0.975998	176964	3802	550	0
ZH38T0019433	Proximal	ENSG00000103187.8	COTL1	protein_coding	0.975942	8235	14	189	0
ZH38T0015911	TSS	ENSG00000211890.4, ENSG00000211892.4, ENSG00000211893.4, ENSG00000211895.5, ENSG00000211896.7, ENSG00000211897.9, ENSG00000211898.7, ENSG00000211899.10	IGHA2 , IGHG4 , IGHG2 , IGHA1 , IGHG1 , IGHG3 , IGHD , IGHM	IG_C_gene, IG_C_gene, IG_C_gene, IG_C_gene, IG_C_gene, IG_C_gene, IG_C_gene, IG_C_gene	0.975929	2311	7	50	0
ZH38T0051647	Proximal	ENSG00000237311.3	AL034397.2	lncRNA	0.975877	5259	1	129	0
ZH38T0027970	Intron	ENSG00000196843.16	ARID5A	protein_coding	0.975826	3956	0	98	0
ZH38T0024487	Proximal	ENSG00000268555.2	AC123912.4	lncRNA	0.975822	1009	22	3	0
ZH38T0034274	Proximal	ENSG00000168268.11	NT5DC2	protein_coding	0.975749	2052	12	39	0
ZH38T0021378	Intron	ENSG00000250838.1	AC091133.2	lncRNA	0.975737	563	11	3	0
ZH38T0046678	Proximal	ENSG00000055130.17	CUL1	protein_coding	0.975728	15477	253	132	0
ZH38T0013506	Intron	ENSG00000133106.14	EPSTI1	protein_coding	0.975694	4215	42	63	0
ZH38T0004249	Proximal	ENSG00000159346.13	ADIPOR1	protein_coding	0.975667	6656	100	66	0
ZH38T0017234	Proximal	ENSG00000166426.8	CRABP1	protein_coding	0.975655	521	1	12	0
ZH38T0024133	Proximal	ENSG00000008441.16	NFIX	protein_coding	0.975629	4844	4	117	0
ZH38T0000389	Proximal	ENSG00000162496.9	DHRS3	protein_coding	0.975597	7356	14	170	0
ZH38T0032199	Exon	ENSG00000185608.8	MRPL40	protein_coding	0.975577	89317	198	2038	0
ZH38T0050759	Intron	ENSG00000165688.12	PMPCA	protein_coding	0.975524	3348	36	48	0
ZH38T0032284	Proximal	ENSG00000185651.14	UBE2L3	protein_coding	0.975508	386264	9492	206	0
ZH38T0041208	Proximal	ENSG00000204628.11	RACK1	protein_coding	0.975468	22228	31	528	0
ZH38T0044750	Exon	ENSG00000253293.5	HOXA10	protein_coding	0.97541	238	0	6	0
ZH38T0047396	Proximal	ENSG00000104671.8, ENSG00000285669.1	DCTN6 , AC026979.4	protein_coding, lncRNA	0.975377	3169	29	51	0
ZH38T0037261	Proximal	ENSG00000169288.18	MRPL1	protein_coding	0.975374	4040	21	81	0
ZH38T0051406	Proximal	ENSG00000147124.12	ZNF41	protein_coding	0.975332	18504	342	126	0
ZH38T0021411	Intron	ENSG00000136504.12	KAT7	protein_coding	0.975309	6162	108	48	0
ZH38T0012329	Proximal	ENSG00000173598.14	NUDT4	protein_coding	0.975301	15005	120	260	0
ZH38T0044290	TSS	ENSG00000164818.16, ENSG00000164828.18	DNAAF5 , SUN1	protein_coding, protein_coding	0.9753	2922	72	2	0
ZH38T0000608	Proximal	ENSG00000127483.18	HP1BP3	protein_coding	0.975296	11686	262	34	0
ZH38T0026800	Proximal	ENSG00000115226.10	FNDC4	protein_coding	0.975175	1532	0	39	0
ZH38T0000383	Intron	ENSG00000048707.15	VPS13D	protein_coding	0.975127	31050	196	596	0
ZH38T0001038	Proximal	ENSG00000121900.19	TMEM54	protein_coding	0.97502	9914	98	156	0
ZH38T0018805	Proximal	ENSG00000083799.17	CYLD	protein_coding	0.975005	47707	21	1202	0
ZH38T0015432	Intron	ENSG00000140022.13	STON2	protein_coding	0.975	312	0	8	0
ZH38T0017284	Proximal	ENSG00000172379.21	ARNT2	protein_coding	0.974988	4054	104	0	0
ZH38T0024011	Intron	ENSG00000130176.8	CNN1	protein_coding	0.974988	101739	402	2208	0
ZH38T0019771	Intron	ENSG00000132382.14	MYBBP1A	protein_coding	0.974943	856	0	22	0
ZH38T0035131	Proximal	ENSG00000114631.11	PODXL2	protein_coding	0.974926	661	2	15	0
ZH38T0027985	Intron	ENSG00000168758.11	SEMA4C	protein_coding	0.974907	1049	25	2	0
ZH38T0014313	Proximal	ENSG00000165795.23	NDRG2	protein_coding	0.974905	45841	26	1154	0
ZH38T0043210	Proximal	ENSG00000123545.6	NDUFAF4	protein_coding	0.9749	2680	1	68	0
ZH38T0006937	Proximal	ENSG00000119950.21	MXI1	protein_coding	0.974877	3182	32	50	0
ZH38T0038560	Intergenic	ENSG00000179046.8	TRIML2	protein_coding	0.974874	582	8	7	0
ZH38T0010877	Intron	ENSG00000008394.13	MGST1	protein_coding	0.974871	33984	144	732	0
ZH38T0008748	Proximal	ENSG00000173486.13, ENSG00000286264.1	FKBP2 , AP001453.5	protein_coding, protein_coding	0.974853	31866	132	690	0
ZH38T0036368	Proximal	ENSG00000159674.12	SPON2	protein_coding	0.974844	5619	2	143	0
ZH38T0003231	Proximal	ENSG00000116539.13	ASH1L	protein_coding	0.974823	18895	168	320	0
ZH38T0022091	Proximal	ENSG00000132475.10	H3F3B	protein_coding	0.974821	6117	0	158	0
ZH38T0009333	Intron	ENSG00000137474.22	MYO7A	protein_coding	0.9748	17020	148	292	0
ZH38T0016619	Proximal	ENSG00000104112.9	SCG3	protein_coding	0.974798	15936	50	362	0
ZH38T0048420	Intron	ENSG00000170961.7	HAS2	protein_coding	0.974784	2706	1	69	0
ZH38T0044069	Proximal	ENSG00000215712.10	TMEM242	protein_coding	0.974715	81570	366	1750	0
ZH38T0032452	Intron	ENSG00000100109.17	TFIP11	protein_coding	0.974638	1345	0	35	0
ZH38T0027882	Proximal	ENSG00000211625.2	IGKV3D-20	IG_V_gene	0.9746	1036	6	21	0
ZH38T0018869	Intron	ENSG00000159461.15	AMFR	protein_coding	0.9746	1036	17	10	0
ZH38T0019873	Exon	ENSG00000286190.1	AC055839.2	protein_coding	0.974581	3604	0	94	0
ZH38T0026816	Intron	ENSG00000243147.8	MRPL33	protein_coding	0.974554	5898	50	104	0
ZH38T0013666	Proximal	ENSG00000102753.10	KPNA3	protein_coding	0.974502	44142	932	223	0
ZH38T0022303	Intron	ENSG00000173821.19	AC124319.1	protein_coding	0.974499	1070	0	28	0
ZH38T0036592	Proximal	ENSG00000163145.12	C1QTNF7	protein_coding	0.974498	4127	86	22	0
ZH38T0020786	Proximal	ENSG00000108298.11	RPL19	protein_coding	0.97448	19131	20	481	0
ZH38T0009903	Intron	ENSG00000137726.17, ENSG00000255245.4	FXYD6 , FXYD6-FXYD2	protein_coding, protein_coding	0.974409	9443	99	149	0
ZH38T0040592	Intron	ENSG00000171992.13	SYNPO	protein_coding	0.974401	24780	6	645	0
ZH38T0007544	Exon	ENSG00000130592.15	LSP1	protein_coding	0.974392	4604	83	38	0
ZH38T0045517	Intron	ENSG00000085563.14	ABCB1	protein_coding	0.974359	570	0	15	0
ZH38T0013786	Intron	ENSG00000274052.2, ENSG00000285764.1	OR7E156P , AL445989.2	transcribed_unprocessed_pseudogene, lncRNA	0.974359	304	4	4	0
ZH38T0040993	Intron	ENSG00000175416.13	CLTB	protein_coding	0.974343	19026	66	435	0
ZH38T0018652	Intron	ENSG00000156860.15	FBRS	protein_coding	0.974299	417	0	11	0
ZH38T0007536	Proximal	ENSG00000130592.15	LSP1	protein_coding	0.974256	31713	527	311	0
ZH38T0001771	Intergenic	ENSG00000116675.16	DNAJC6	protein_coding	0.974229	1928	12	39	0
ZH38T0027024	Intron	ENSG00000115904.12	SOS1	protein_coding	0.97422	8616	81	147	0
ZH38T0003844	Proximal	ENSG00000120341.18	SEC16B	protein_coding	0.974178	830	10	12	0
ZH38T0008967	Intron	ENSG00000087365.15	SF3B2	protein_coding	0.97416	754	0	20	0
ZH38T0002634	Proximal	ENSG00000196369.11	SRGAP2B	protein_coding	0.974145	11680	16	294	0
ZH38T0036499	Intron	ENSG00000170871.12	KIAA0232	protein_coding	0.974136	8286	22	198	0
ZH38T0019689	Intron	ENSG00000132386.11	SERPINF1	protein_coding	0.974103	3122	5	78	0
ZH38T0035059	Intron	ENSG00000065371.17	ROPN1	protein_coding	0.97407	16566	231	210	0
ZH38T0002864	Proximal	ENSG00000143418.19	CERS2	protein_coding	0.974026	1050	0	28	0
ZH38T0040787	Intron	ENSG00000170231.15	FABP6	protein_coding	0.974026	150	4	0	0
ZH38T0040552	Proximal	ENSG00000113712.18	CSNK1A1	protein_coding	0.974007	57295	760	769	0
ZH38T0013371	Intron	ENSG00000073910.21	FRY	protein_coding	0.973998	4495	35	85	0
ZH38T0028365	Intron	ENSG00000136717.15	BIN1	protein_coding	0.973995	13596	33	330	0
ZH38T0042695	Intron	ENSG00000180992.7	MRPL14	protein_coding	0.973995	412	0	11	0
ZH38T0020437	Proximal	ENSG00000007171.17	NOS2	protein_coding	0.973978	524	5	9	0
ZH38T0003060	Proximal	ENSG00000189171.14	S100A13	protein_coding	0.973973	274298	1748	5582	0
ZH38T0045430	Proximal	ENSG00000187257.16	RSBN1L	protein_coding	0.973921	14266	174	208	0
ZH38T0017192	Intron	ENSG00000140386.13	SCAPER	protein_coding	0.973913	448	0	12	0
ZH38T0022225	Intron	ENSG00000187775.16	DNAH17	protein_coding	0.973856	298	2	6	0
ZH38T0050831	Proximal	ENSG00000176101.12	SSNA1	protein_coding	0.973824	8408	0	226	0
ZH38T0026963	Intron	ENSG00000008869.12	HEATR5B	protein_coding	0.97375	779	7	14	0
ZH38T0033818	Proximal	ENSG00000188846.13	RPL14	protein_coding	0.973659	5988	51	111	0
ZH38T0007080	Proximal	ENSG00000165669.14	FAM204A	protein_coding	0.973652	1589	29	14	0
ZH38T0031188	Intron	ENSG00000224397.7	SMIM25	lncRNA	0.973641	4728	19	109	0
ZH38T0026748	Intron	ENSG00000084764.11	MAPRE3	protein_coding	0.973592	7263	0	197	0
ZH38T0022755	Intron	ENSG00000101773.19	RBBP8	protein_coding	0.973592	2212	12	48	0
ZH38T0029785	Intron	ENSG00000114923.17	SLC4A3	protein_coding	0.973588	5308	0	144	0
ZH38T0001390	Intron	ENSG00000187147.18	RNF220	protein_coding	0.973529	5958	0	162	0
ZH38T0018908	Proximal	ENSG00000140853.15	NLRC5	protein_coding	0.97351	441	9	3	0
ZH38T0011203	Proximal	ENSG00000134294.14	SLC38A2	protein_coding	0.973493	8557	36	197	0
ZH38T0012949	Proximal	ENSG00000111011.18	RSRC2	protein_coding	0.973489	918	14	11	0
ZH38T0000235	Proximal	ENSG00000116285.13	ERRFI1	protein_coding	0.973446	5169	141	0	0
ZH38T0013403	Intron	ENSG00000172915.18	NBEA	protein_coding	0.973422	2344	20	44	0
ZH38T0050558	Proximal	ENSG00000119383.19	PTPA	protein_coding	0.973407	53880	1424	48	0
ZH38T0038494	Intron	ENSG00000109771.15	LRP2BP	protein_coding	0.973404	1098	2	28	0
ZH38T0052414	Intron	ENSG00000102181.21	CD99L2	protein_coding	0.973399	4940	20	115	0
ZH38T0049862	Proximal	ENSG00000188312.14	CENPP	protein_coding	0.973392	878	4	20	0
ZH38T0023326	Proximal	ENSG00000141759.15	TXNL4A	protein_coding	0.973329	66018	594	1212	3
ZH38T0022047	Intron	ENSG00000177303.10	CASKIN2	protein_coding	0.973256	2511	39	30	0
ZH38T0047616	Intron	ENSG00000253729.7	PRKDC	protein_coding	0.973256	1674	6	40	0
ZH38T0036373	Proximal	ENSG00000159692.15	CTBP1	protein_coding	0.973247	13824	72	308	0
ZH38T0003367	Intron	ENSG00000027869.11	SH2D2A	protein_coding	0.973175	6639	30	153	0
ZH38T0041534	Intron	ENSG00000050393.11	MCUR1	protein_coding	0.973174	1959	15	39	0
ZH38T0009582	Proximal	ENSG00000183340.7	JRKL	protein_coding	0.973149	1196	15	18	0
ZH38T0043989	Intron	ENSG00000181472.5	ZBTB2	protein_coding	0.973137	1920	38	15	0
ZH38T0046626	TSS	ENSG00000211772.11	TRBC2	TR_C_gene	0.97309	3146	33	54	0
ZH38T0051359	Intron	ENSG00000189221.9	MAOA	protein_coding	0.973086	5134	86	56	0
ZH38T0032333	Proximal	ENSG00000185686.18	PRAME	protein_coding	0.973058	20370	162	402	0
ZH38T0010958	Proximal	ENSG00000069431.11	ABCC9	protein_coding	0.973051	3033	12	72	0
ZH38T0022022	Proximal	ENSG00000170190.16	SLC16A5	protein_coding	0.97305	686	12	7	0
ZH38T0017370	Intron	ENSG00000136383.6	ALPK3	protein_coding	0.973034	433	0	12	0
ZH38T0000129	Proximal	ENSG00000157870.16	PRXL2B	protein_coding	0.973009	8868	72	174	0
ZH38T0002805	Proximal	ENSG00000023902.14	PLEKHO1	protein_coding	0.973007	14058	138	252	0
ZH38T0036863	Proximal	ENSG00000151806.14	GUF1	protein_coding	0.97298	18077	170	332	0
ZH38T0040272	Proximal	ENSG00000131508.16	UBE2D2	protein_coding	0.972973	35352	446	536	0
ZH38T0041277	Proximal	ENSG00000124570.20	SERPINB6	protein_coding	0.97295	45357	143	1118	0
ZH38T0044067	Intron	ENSG00000049618.23	ARID1B	protein_coding	0.972923	7294	0	203	0
ZH38T0002888	Intron	ENSG00000163156.11	SCNM1	protein_coding	0.972912	1724	0	48	0
ZH38T0042452	Proximal	ENSG00000096070.19	BRPF3	protein_coding	0.972908	3663	0	102	0
ZH38T0010315	Proximal	ENSG00000082805.20	ERC1	protein_coding	0.972877	12375	70	270	5
ZH38T0032924	Proximal	ENSG00000100354.21	TNRC6B	protein_coding	0.972871	9252	256	0	2
ZH38T0001127	Proximal	ENSG00000116898.12	MRPS15	protein_coding	0.972851	1935	33	21	0
ZH38T0051967	Intron	ENSG00000172465.14	TCEAL1	protein_coding	0.972809	178815	3	4995	0
ZH38T0016886	Intron	ENSG00000166831.9	RBPMS2	protein_coding	0.972803	465	1	12	0
ZH38T0052275	Proximal	ENSG00000203952.9	CCDC160	protein_coding	0.9728	8512	66	172	0
ZH38T0010502	Proximal	ENSG00000159335.16	PTMS	protein_coding	0.9728	608	1	16	0
ZH38T0019645	Intron	ENSG00000159842.15	ABR	protein_coding	0.972769	2572	28	44	0
ZH38T0029202	Intron	ENSG00000064933.17	PMS1	protein_coding	0.9727	15392	16	416	0
ZH38T0052651	Intron	ENSG00000067048.17	DDX3Y	protein_coding	0.972698	10118	106	178	0
ZH38T0027478	Proximal	ENSG00000115977.19	AAK1	protein_coding	0.97265	11736	60	270	0
ZH38T0041602	Intron	ENSG00000165097.15	KDM1B	protein_coding	0.972649	2027	8	49	0
ZH38T0040728	Intron	ENSG00000055163.20	CYFIP2	protein_coding	0.972625	19932	36	525	0
ZH38T0012223	Proximal	ENSG00000133773.12	CCDC59	protein_coding	0.972604	66884	629	1254	1
ZH38T0010480	Intergenic	ENSG00000111642.15	CHD4	protein_coding	0.972591	3513	5	94	0
ZH38T0030678	Intron	ENSG00000101350.8	KIF3B	protein_coding	0.972581	603	0	17	0
ZH38T0032814	Intron	ENSG00000100142.15	POLR2F	protein_coding	0.972561	1276	24	12	0
ZH38T0018699	Proximal	ENSG00000167394.13	ZNF668	protein_coding	0.972511	4776	78	57	0
ZH38T0040317	Proximal	ENSG00000113141.18	IK	protein_coding	0.972498	2157	18	43	0
ZH38T0031960	Intron	ENSG00000160199.14	PKNOX1	protein_coding	0.972477	848	8	16	0
ZH38T0044381	Intron	ENSG00000157927.16	RADIL	protein_coding	0.972446	1447	3	38	0
ZH38T0025024	Intron	ENSG00000105221.17	AKT2	protein_coding	0.972414	10152	57	231	0
ZH38T0016972	Proximal	ENSG00000129007.14	CALML4	protein_coding	0.972324	124368	108	3432	0
ZH38T0028798	Intron	ENSG00000184611.11	KCNH7	protein_coding	0.972318	1686	4	44	0
ZH38T0012190	Intron	ENSG00000058272.19	PPP1R12A	protein_coding	0.972292	1930	10	45	0
ZH38T0039717	TSS	ENSG00000153113.23	CAST	protein_coding	0.972289	6456	54	130	0
ZH38T0005384	Intron	ENSG00000077943.8	ITGA8	protein_coding	0.97226	1437	8	33	0
ZH38T0037577	Exon	ENSG00000109332.20	UBE2D3	protein_coding	0.972246	8968	40	216	0
ZH38T0015680	Proximal	ENSG00000066629.17	EML1	protein_coding	0.972245	7041	198	3	0
ZH38T0036505	Proximal	ENSG00000132405.19	TBC1D14	protein_coding	0.972197	47066	1060	286	0
ZH38T0050589	Intron	ENSG00000187239.17	FNBP1	protein_coding	0.972182	8108	80	152	0
ZH38T0020785	Proximal	ENSG00000108298.11	RPL19	protein_coding	0.972145	4188	8	112	0
ZH38T0045417	Intron	ENSG00000135205.15	CCDC146	protein_coding	0.972145	1047	2	28	0
ZH38T0015433	Intron	ENSG00000140022.13	STON2	protein_coding	0.972143	10958	50	264	0
ZH38T0014669	Intron	ENSG00000092020.10	PPP2R3C	protein_coding	0.972067	348	0	10	0
ZH38T0014673	Proximal	ENSG00000092020.10	PPP2R3C	protein_coding	0.97206	4662	18	116	0
ZH38T0046142	Intergenic	ENSG00000287592.1	AC073348.2	lncRNA	0.972028	834	23	1	0
ZH38T0045310	Intron	ENSG00000106635.8	BCL7B	protein_coding	0.972017	7503	60	156	0
ZH38T0003184	Proximal	ENSG00000169241.19	SLC50A1	protein_coding	0.972002	8228	0	237	0
ZH38T0041642	Intron	ENSG00000145996.11	CDKAL1	protein_coding	0.971963	1040	2	28	0
ZH38T0020563	Proximal	ENSG00000108576.10	SLC6A4	protein_coding	0.97191	173	0	5	0
ZH38T0010963	Intergenic	ENSG00000111726.13	CMAS	protein_coding	0.97191	173	1	4	0
ZH38T0044285	Proximal	ENSG00000237181.1	AC147651.4	lncRNA	0.971875	622	13	5	0
ZH38T0023941	Intron	ENSG00000079805.16, ENSG00000213339.9	DNM2 , QTRT1	protein_coding, protein_coding	0.971854	1174	5	29	0
ZH38T0038288	Intron	ENSG00000109511.11	ANXA10	protein_coding	0.971817	4931	117	26	0
ZH38T0007992	Proximal	ENSG00000179119.15	SPTY2D1	protein_coding	0.971798	3756	2	107	0
ZH38T0017816	Proximal	ENSG00000063854.13	HAGH	protein_coding	0.971745	26688	776	0	0
ZH38T0016688	Intron	ENSG00000260916.7, ENSG00000261771.5	CCPG1 , DNAAF4-CCPG1	protein_coding, lncRNA	0.971739	2235	40	25	0
ZH38T0001356	Intron	ENSG00000142949.17	PTPRF	protein_coding	0.971739	1341	30	9	0
ZH38T0004224	Proximal	ENSG00000077157.22	PPP1R12B	protein_coding	0.971721	12164	64	290	0
ZH38T0006875	Proximal	ENSG00000148834.13	GSTO1	protein_coding	0.971719	2577	72	3	0
ZH38T0015019	TSS	ENSG00000126814.6	TRMT5	protein_coding	0.971688	89097	63	2533	0
ZH38T0043652	Intron	ENSG00000198945.7	L3MBTL3	protein_coding	0.971674	6792	132	66	0
ZH38T0026075	Intron	ENSG00000105048.17	TNNT1	protein_coding	0.971672	56699	184	1469	0
ZH38T0011827	Proximal	ENSG00000166888.12	STAT6	protein_coding	0.971665	60731	1128	643	0
ZH38T0034086	Exon	ENSG00000178057.14	NDUFAF3	protein_coding	0.971646	58223	78	1621	0
ZH38T0014672	Proximal	ENSG00000092020.10	PPP2R3C	protein_coding	0.971639	144576	2114	2104	2
ZH38T0006356	Intergenic	ENSG00000122367.19	LDB3	protein_coding	0.971624	8526	153	96	0
ZH38T0051497	Intergenic	ENSG00000101951.16	PAGE4	protein_coding	0.971609	308	9	0	0
ZH38T0031351	Proximal	ENSG00000087495.17	PHACTR3	protein_coding	0.971602	479	12	2	0
ZH38T0009958	Exon	ENSG00000110367.13	DDX6	protein_coding	0.971589	5027	6	141	0
ZH38T0027876	Proximal	ENSG00000211592.8, ENSG00000211593.2, ENSG00000239855.1, ENSG00000240382.3, ENSG00000241755.1, ENSG00000243238.1, ENSG00000243290.3, ENSG00000244437.1, ENSG00000253497.1	IGKC , IGKJ5 , IGKV1-6 , IGKV1-17 , IGKV1-9 , IGKV2-30 , IGKV1-12 , IGKV3-15 , IGKV1-13	IG_C_gene, IG_J_gene, IG_V_gene, IG_V_gene, IG_V_gene, IG_V_gene, IG_V_gene, IG_V_gene, IG_V_pseudogene	0.971571	2529	40	34	0
ZH38T0026080	Proximal	ENSG00000105048.17	TNNT1	protein_coding	0.971558	45842	912	430	0
ZH38T0020231	Proximal	ENSG00000187688.15	TRPV2	protein_coding	0.971538	3789	97	14	0
ZH38T0040795	Proximal	ENSG00000164611.13	PTTG1	protein_coding	0.971508	3853	9	104	0
ZH38T0023395	Proximal	ENSG00000167468.16	GPX4	protein_coding	0.971469	18046	180	350	0
ZH38T0030691	Proximal	ENSG00000101367.9	MAPRE1	protein_coding	0.971448	1463	13	30	0
ZH38T0024316	Proximal	ENSG00000130309.11	COLGALT1	protein_coding	0.971407	2548	40	35	0
ZH38T0030711	Proximal	ENSG00000101417.12	PXMP4	protein_coding	0.971404	3363	21	78	0
ZH38T0043350	Intron	ENSG00000135596.18	MICAL1	protein_coding	0.971366	1323	24	15	0
ZH38T0017695	Proximal	ENSG00000007384.15	RHBDF1	protein_coding	0.971354	1492	44	0	0
ZH38T0000062	Intron	ENSG00000215915.9	ATAD3C	protein_coding	0.971354	373	0	11	0
ZH38T0031604	TSS	ENSG00000154727.10	GABPA	protein_coding	0.971337	35277	408	633	0
ZH38T0016697	Exon	ENSG00000069869.16	NEDD4	protein_coding	0.971309	5586	24	141	0
ZH38T0041633	Exon	ENSG00000112242.15	E2F3	protein_coding	0.971292	1218	35	1	0
ZH38T0012888	Intron	ENSG00000089094.19	KDM2B	protein_coding	0.971279	14880	260	180	0
ZH38T0017719	Intron	ENSG00000167930.17	FAM234A	protein_coding	0.971279	1116	0	33	0
ZH38T0023223	Intron	ENSG00000071991.8	CDH19	protein_coding	0.971264	1014	2	28	0
ZH38T0052041	Proximal	ENSG00000237863.3	AL035425.1	lncRNA	0.971264	1014	3	27	0
ZH38T0042507	Proximal	ENSG00000226533.1	BTBD9-AS1	lncRNA	0.971264	169	1	4	0
ZH38T0021097	Proximal	ENSG00000108830.10	RND2	protein_coding	0.971253	2365	35	35	0
ZH38T0011577	Proximal	ENSG00000139574.8	NPFF	protein_coding	0.971246	304	0	9	0
ZH38T0029491	Proximal	ENSG00000163249.12	CCNYL1	protein_coding	0.971239	3512	36	68	0
ZH38T0024322	Intron	ENSG00000130475.14	FCHO1	protein_coding	0.971231	5908	7	168	0
ZH38T0006234	Intron	ENSG00000270087.5	AC010997.3	lncRNA	0.971193	1888	54	2	0
ZH38T0025235	Intron	ENSG00000011422.12	PLAUR	protein_coding	0.971154	2727	4	77	0
ZH38T0034273	Proximal	ENSG00000168268.11	NT5DC2	protein_coding	0.971154	1515	36	9	0
ZH38T0013265	Intron	ENSG00000132932.17	ATP8A2	protein_coding	0.971154	404	0	12	0
ZH38T0028040	Intron	ENSG00000158417.11	EIF5B	protein_coding	0.971119	538	2	14	0
ZH38T0046854	Proximal	ENSG00000105993.15	DNAJB6	protein_coding	0.971102	77022	1488	804	0
ZH38T0011725	Proximal	ENSG00000197728.11	RPS26	protein_coding	0.971094	671765	2979	17005	12
ZH38T0047361	Proximal	ENSG00000012232.8	EXTL3	protein_coding	0.971026	13707	13	396	0
ZH38T0020584	Intron	ENSG00000184060.11	ADAP2	protein_coding	0.970986	4886	38	108	0
ZH38T0029653	Proximal	ENSG00000079308.19	TNS1	protein_coding	0.970903	12146	306	57	1
ZH38T0029793	Proximal	ENSG00000116106.12	EPHA4	protein_coding	0.970874	3000	51	39	0
ZH38T0012918	Intron	ENSG00000158023.10	WDR66	protein_coding	0.970874	200	5	1	0
ZH38T0023643	Intergenic	ENSG00000105426.16	PTPRS	protein_coding	0.970839	4561	85	52	0
ZH38T0004761	Intron	ENSG00000183814.15	LIN9	protein_coding	0.970833	466	8	6	0
ZH38T0036346	Intron	ENSG00000215375.6	MYL5	protein_coding	0.97082	11079	80	253	0
ZH38T0009087	Proximal	ENSG00000110717.13	NDUFS8	protein_coding	0.970787	14356	32	400	0
ZH38T0025707	Intron	ENSG00000169169.14	CPT1C	protein_coding	0.970783	3522	12	94	0
ZH38T0018539	Intron	ENSG00000013364.19	MVP	protein_coding	0.97076	664	2	18	0
ZH38T0020782	Intron	ENSG00000067191.16	CACNB1	protein_coding	0.970741	5972	100	80	0
ZH38T0022355	Proximal	ENSG00000184009.12	ACTG1	protein_coding	0.970712	25753	0	777	0
ZH38T0008784	Intron	ENSG00000168071.22	CCDC88B	protein_coding	0.970711	232	0	7	0
ZH38T0008297	Intron	ENSG00000175216.14	CKAP5	protein_coding	0.970655	6020	14	168	0
ZH38T0051882	Intron	ENSG00000000005.6	TNMD	protein_coding	0.970642	529	6	10	0
ZH38T0013636	Proximal	ENSG00000139687.15	RB1	protein_coding	0.970618	8523	72	186	0
ZH38T0001143	Intron	ENSG00000163879.11	DNALI1	protein_coding	0.970588	528	0	16	0
ZH38T0051499	Proximal	ENSG00000101951.16	PAGE4	protein_coding	0.970588	462	10	4	0
ZH38T0000254	Intron	ENSG00000142599.19	RERE	protein_coding	0.970588	396	0	12	0
ZH38T0018171	Intron	ENSG00000157045.9	NTAN1	protein_coding	0.970562	4418	12	122	0
ZH38T0048097	Proximal	ENSG00000197275.14, ENSG00000265817.3	RAD54B , FSBP	protein_coding, protein_coding	0.970536	1087	1	32	0
ZH38T0003742	Intron	ENSG00000010932.17	FMO1	protein_coding	0.970534	2108	20	44	0
ZH38T0020318	Intron	ENSG00000154874.15	CCDC144B	transcribed_unprocessed_pseudogene	0.970501	1316	6	34	0
ZH38T0021659	Proximal	ENSG00000175155.9	YPEL2	protein_coding	0.97045	20657	509	120	0
ZH38T0023352	Proximal	ENSG00000099821.14	POLRMT	protein_coding	0.97043	361	5	6	0
ZH38T0052590	Proximal	ENSG00000160211.18	G6PD	protein_coding	0.9704	59700	798	1023	0
ZH38T0045826	Intron	ENSG00000106351.13	AGFG2	protein_coding	0.970395	295	2	7	0
ZH38T0051231	Proximal	ENSG00000184831.13	APOO	protein_coding	0.970373	35865	919	173	3
ZH38T0050755	Proximal	ENSG00000160360.13	GPSM1	protein_coding	0.970339	687	12	9	0
ZH38T0029671	Proximal	ENSG00000135926.15	TMBIM1	protein_coding	0.970263	8255	18	235	0
ZH38T0015429	Proximal	ENSG00000273783.1	AL136040.1	lncRNA	0.970221	1010	15	16	0
ZH38T0036352	Intron	ENSG00000185619.18	PCGF3	protein_coding	0.970192	2734	60	24	0
ZH38T0034991	Proximal	ENSG00000173230.15	GOLGB1	protein_coding	0.970157	5754	42	135	0
ZH38T0048473	Proximal	ENSG00000147684.9	NDUFB9	protein_coding	0.970149	260	2	6	0
ZH38T0004894	Proximal	ENSG00000231663.1	COA6-AS1	lncRNA	0.970127	8281	0	255	0
ZH38T0044500	Proximal	ENSG00000106443.16	PHF14	protein_coding	0.970111	11295	36	312	0
ZH38T0045837	Proximal	ENSG00000106330.12	MOSPD3	protein_coding	0.970076	2561	4	75	0
ZH38T0027981	Intron	ENSG00000163126.15	ANKRD23	protein_coding	0.970063	6027	105	81	0
ZH38T0051069	Proximal	ENSG00000004961.15	HCCS	protein_coding	0.970036	5730	39	138	0
ZH38T0051191	Intron	ENSG00000184368.16	MAP7D2	protein_coding	0.970025	15792	188	300	0
ZH38T0038747	Proximal	ENSG00000145555.15	MYO10	protein_coding	0.970008	6242	116	77	0
ZH38T0016062	TSS	ENSG00000206727.1, ENSG00000224078.15	SNORD116-9 , SNHG14	snoRNA, lncRNA	0.970005	3622	25	87	0
ZH38T0047412	Proximal	ENSG00000104691.15	UBXN8	protein_coding	0.969996	7080	57	162	0
ZH38T0018173	Proximal	ENSG00000157045.9	NTAN1	protein_coding	0.969979	64944	1686	324	0
ZH38T0013012	Proximal	ENSG00000119242.8	CCDC92	protein_coding	0.969979	27237	816	27	0
ZH38T0043054	Proximal	ENSG00000146247.14	PHIP	protein_coding	0.969959	5166	100	60	0
ZH38T0010127	Intron	ENSG00000149557.13	FEZ1	protein_coding	0.969947	2582	10	70	0
ZH38T0011489	Intron	ENSG00000170421.12	KRT8	protein_coding	0.969945	2840	4	84	0
ZH38T0025301	Proximal	ENSG00000130203.10	APOE	protein_coding	0.969852	1705	14	39	0
ZH38T0004443	Intron	ENSG00000123836.15	PFKFB2	protein_coding	0.969848	9714	86	216	0
ZH38T0005966	Intron	ENSG00000182010.11	RTKN2	protein_coding	0.969841	1222	30	8	0
ZH38T0040594	Proximal	ENSG00000171992.13	SYNPO	protein_coding	0.969836	10546	2	326	0
ZH38T0021161	Proximal	ENSG00000108312.15	UBTF	protein_coding	0.969815	22844	56	655	0
ZH38T0016971	Proximal	ENSG00000033800.13	PIAS1	protein_coding	0.969812	152982	4110	652	0
ZH38T0020433	Intron	ENSG00000141068.14	KSR1	protein_coding	0.969771	5935	5	180	0
ZH38T0050552	Intron	ENSG00000095321.17	CRAT	protein_coding	0.969758	481	8	7	0
ZH38T0046314	Intergenic	ENSG00000128596.17	CCDC136	protein_coding	0.969749	2276	6	65	0
ZH38T0010951	Intron	ENSG00000111716.12, ENSG00000285854.1	LDHB , AC010197.2	protein_coding, protein_coding	0.969737	2211	0	69	0
ZH38T0019991	Proximal	ENSG00000181222.16	POLR2A	protein_coding	0.969725	18738	129	456	0
ZH38T0012859	Proximal	ENSG00000111775.3, ENSG00000111780.8	COX6A1 , AL021546.1	protein_coding, protein_coding	0.969697	2752	4	82	0
ZH38T0044001	Exon	ENSG00000091831.23	ESR1	protein_coding	0.969697	544	5	12	0
ZH38T0027862	Proximal	ENSG00000211592.8, ENSG00000244437.1	IGKC , IGKV3-15	IG_C_gene, IG_V_gene	0.969668	15281	85	376	17
ZH38T0008285	Proximal	ENSG00000110492.15	MDK	protein_coding	0.969665	58496	0	1830	0
ZH38T0017349	Intron	ENSG00000166503.9	HDGFL3	protein_coding	0.969644	8816	66	210	0
ZH38T0024389	Proximal	ENSG00000105700.11	KXD1	protein_coding	0.969636	958	20	10	0
ZH38T0049324	Intron	ENSG00000198467.15	TPM2	protein_coding	0.969602	4976	4	152	0
ZH38T0010715	Intron	ENSG00000173391.9	OLR1	protein_coding	0.969565	892	0	28	0
ZH38T0041187	Intron	ENSG00000196670.13	ZFP62	protein_coding	0.969534	2164	6	62	0
ZH38T0030693	Proximal	ENSG00000101367.9	MAPRE1	protein_coding	0.969527	1209	4	34	0
ZH38T0003565	Proximal	ENSG00000143226.13, ENSG00000273112.1	FCGR2A , AL590385.2	protein_coding, lncRNA	0.969525	2736	0	86	0
ZH38T0040223	Intron	ENSG00000113013.15	HSPA9	protein_coding	0.969506	922	1	28	0
ZH38T0037624	Proximal	ENSG00000138801.9	PAPSS1	protein_coding	0.969486	1811	31	26	0
ZH38T0049314	Intron	ENSG00000198467.15	TPM2	protein_coding	0.969474	2509	0	79	0
ZH38T0046789	Proximal	ENSG00000106617.14	PRKAG2	protein_coding	0.969466	1397	44	0	0
ZH38T0049969	Proximal	ENSG00000136842.14	TMOD1	protein_coding	0.9694	14636	460	2	0
ZH38T0004309	Intron	ENSG00000143845.15	ETNK2	protein_coding	0.969388	950	2	28	0
ZH38T0037467	Proximal	ENSG00000184305.15	CCSER1	protein_coding	0.969388	855	8	19	0
ZH38T0001387	Proximal	ENSG00000117419.15	ERI3	protein_coding	0.969314	33610	1046	18	0
ZH38T0014824	Intron	ENSG00000214900.10	LINC01588	lncRNA	0.969272	28989	52	867	0
ZH38T0044465	Proximal	ENSG00000106399.11	RPA3	protein_coding	0.969259	178709	513	5155	0
ZH38T0004071	Proximal	ENSG00000116747.12	RO60	protein_coding	0.969253	28560	120	774	12
ZH38T0047439	Proximal	ENSG00000133878.9	DUSP26	protein_coding	0.969197	12208	234	154	0
ZH38T0023604	Intron	ENSG00000178078.11	STAP2	protein_coding	0.969173	2578	36	46	0
ZH38T0036950	Intron	ENSG00000134853.12	PDGFRA	protein_coding	0.969152	3393	36	72	0
ZH38T0031181	Intron	ENSG00000124208.16, ENSG00000240849.11	TMEM189-UBE2V1 , TMEM189	protein_coding, protein_coding	0.969115	4644	24	124	0
ZH38T0010612	Intron	ENSG00000065970.9	FOXJ2	protein_coding	0.969072	376	2	10	0
ZH38T0028252	Intron	ENSG00000125637.15	PSD4	protein_coding	0.969048	3256	16	88	0
ZH38T0027560	Proximal	ENSG00000003137.8	CYP26B1	protein_coding	0.968958	1748	22	34	0
ZH38T0038274	Proximal	ENSG00000109472.14	CPE	protein_coding	0.968918	7014	70	155	0
ZH38T0014073	Intron	ENSG00000134884.15	ARGLU1	protein_coding	0.968917	2899	0	93	0
ZH38T0000599	Intron	ENSG00000117245.12	KIF17	protein_coding	0.968912	6171	24	174	0
ZH38T0051692	Proximal	ENSG00000147164.12	SNX12	protein_coding	0.968912	3179	102	0	0
ZH38T0013557	Intron	ENSG00000188342.12	GTF2F2	protein_coding	0.968852	1182	6	32	0
ZH38T0000927	Intron	ENSG00000060656.20	PTPRU	protein_coding	0.968839	6840	44	176	0
ZH38T0024923	Proximal	ENSG00000171747.9	LGALS4	protein_coding	0.968819	2206	11	60	0
ZH38T0021023	Intron	ENSG00000168259.16	DNAJC7	protein_coding	0.968816	1367	19	25	0
ZH38T0045634	Proximal	ENSG00000158528.12	PPP1R9A	protein_coding	0.968807	2112	0	68	0
ZH38T0007991	Proximal	ENSG00000179119.15	SPTY2D1	protein_coding	0.968768	1644	1	52	0
ZH38T0043270	Proximal	ENSG00000132429.10	POPDC3	protein_coding	0.968761	10854	105	245	0
ZH38T0035829	Intron	ENSG00000154310.17	TNIK	protein_coding	0.96875	4216	72	64	0
ZH38T0023740	Proximal	ENSG00000125733.18	TRIP10	protein_coding	0.96875	1860	60	0	0
ZH38T0048974	Intron	ENSG00000107077.18	KDM4C	protein_coding	0.96875	930	0	30	0
ZH38T0008079	Intron	ENSG00000254934.5	LINC00678	lncRNA	0.96875	775	25	0	0
ZH38T0003277	Proximal	ENSG00000160803.8	UBQLN4	protein_coding	0.96875	620	0	20	0
ZH38T0020120	Intron	ENSG00000133026.12	MYH10	protein_coding	0.968722	3252	60	45	0
ZH38T0009929	Intron	ENSG00000110344.9	UBE4A	protein_coding	0.968703	5850	57	132	0
ZH38T0015280	Proximal	ENSG00000156050.9	FAM161B	protein_coding	0.96866	9396	86	218	0
ZH38T0050215	Proximal	ENSG00000138835.22	RGS3	protein_coding	0.96865	3646	17	101	0
ZH38T0028017	Proximal	ENSG00000226791.7	LINC02611	lncRNA	0.968581	2682	0	87	0
ZH38T0051362	Intron	ENSG00000183690.13	EFHC2	protein_coding	0.968553	462	4	11	0
ZH38T0003563	Intron	ENSG00000143226.13	FCGR2A	protein_coding	0.968504	2214	34	38	0
ZH38T0038835	Proximal	ENSG00000056097.16	ZFR	protein_coding	0.968483	13920	6	447	0
ZH38T0032513	Proximal	ENSG00000184117.11	NIPSNAP1	protein_coding	0.968476	44332	1173	270	0
ZH38T0003985	Proximal	ENSG00000116667.14	C1orf21	protein_coding	0.968465	13574	266	176	0
ZH38T0028311	Proximal	ENSG00000155368.16	DBI	protein_coding	0.968459	8106	18	246	0
ZH38T0025338	Proximal	ENSG00000104881.16	PPP1R13L	protein_coding	0.96845	1412	36	10	0
ZH38T0000700	Proximal	ENSG00000142676.14	RPL11	protein_coding	0.968442	982	6	26	0
ZH38T0008204	Proximal	ENSG00000166352.16	C11orf74	protein_coding	0.968404	7356	156	84	0
ZH38T0015076	Proximal	ENSG00000126804.13	ZBTB1	protein_coding	0.968372	13931	94	359	2
ZH38T0012616	Proximal	ENSG00000076248.10	UNG	protein_coding	0.968371	6705	36	183	0
ZH38T0049673	Intron	ENSG00000197969.14	VPS13A	protein_coding	0.968366	2204	4	68	0
ZH38T0042329	Proximal	ENSG00000096433.11	ITPR3	protein_coding	0.968343	1040	22	12	0
ZH38T0019788	Intron	ENSG00000161921.15	CXCL16	protein_coding	0.968324	4830	2	156	0
ZH38T0012659	Intron	ENSG00000122970.16	IFT81	protein_coding	0.968314	1528	6	44	0
ZH38T0038615	TSS	ENSG00000071539.14, ENSG00000248949.1	TRIP13 , AC122719.1	protein_coding, lncRNA	0.968217	1249	31	10	0
ZH38T0025626	Proximal	ENSG00000177380.14	PPFIA3	protein_coding	0.968188	700	18	5	0
ZH38T0009054	Proximal	ENSG00000110711.10	AIP	protein_coding	0.968144	24283	424	375	0
ZH38T0038170	Intron	ENSG00000121211.7	MND1	protein_coding	0.968131	2248	34	40	0
ZH38T0001321	Proximal	ENSG00000177868.12	SVBP	protein_coding	0.968112	188536	4664	1544	2
ZH38T0008039	Proximal	ENSG00000198168.9	SVIP	protein_coding	0.968097	880	10	19	0
ZH38T0046890	Proximal	ENSG00000147364.16	FBXO25	protein_coding	0.968085	546	18	0	0
ZH38T0031325	Intron	ENSG00000087460.25	GNAS	protein_coding	0.968065	30920	200	820	0
ZH38T0041528	Proximal	ENSG00000124523.15	SIRT5	protein_coding	0.968056	7152	228	8	0
ZH38T0045563	Intron	ENSG00000127914.16	AKAP9	protein_coding	0.967989	6078	123	78	0
ZH38T0000600	Intron	ENSG00000117245.12	KIF17	protein_coding	0.967972	4896	42	120	0
ZH38T0006222	Intron	ENSG00000156671.14	SAMD8	protein_coding	0.967949	302	0	10	0
ZH38T0034041	Proximal	ENSG00000164050.13	PLXNB1	protein_coding	0.967933	1630	10	44	0
ZH38T0010823	Proximal	ENSG00000121316.11	PLBD1	protein_coding	0.967916	8779	67	224	0
ZH38T0050218	Intron	ENSG00000106927.12	AMBP	protein_coding	0.967862	783	1	25	0
ZH38T0027336	Intron	ENSG00000173163.10	COMMD1	protein_coding	0.967857	542	13	5	0
ZH38T0052321	Proximal	ENSG00000022267.18	FHL1	protein_coding	0.967842	13062	350	84	0
ZH38T0030396	Intron	ENSG00000182621.18	PLCB1	protein_coding	0.967841	3792	18	90	18
ZH38T0034265	Proximal	ENSG00000010322.16	NISCH	protein_coding	0.967837	6229	136	71	0
ZH38T0024154	Intron	ENSG00000141837.20	CACNA1A	protein_coding	0.967828	5776	0	192	0
ZH38T0031621	Intron	ENSG00000154734.15	ADAMTS1	protein_coding	0.967819	812	0	27	0
ZH38T0009240	Proximal	ENSG00000021300.14	PLEKHB1	protein_coding	0.967811	2706	52	38	0
ZH38T0020317	Intron	ENSG00000154874.15	CCDC144B	transcribed_unprocessed_pseudogene	0.967803	1022	8	26	0
ZH38T0043395	Intron	ENSG00000056972.20	TRAF3IP2	protein_coding	0.967798	7784	42	217	0
ZH38T0028326	Proximal	ENSG00000115109.14	EPB41L5	protein_coding	0.967742	2400	36	44	0
ZH38T0030658	Intergenic	ENSG00000171552.13	BCL2L1	protein_coding	0.96768	23234	34	742	0
ZH38T0023848	Intron	ENSG00000170948.3	MBD3L1	protein_coding	0.967662	389	9	4	0
ZH38T0046860	Intron	ENSG00000155093.19	PTPRN2	protein_coding	0.967651	38408	892	392	0
ZH38T0051053	Intron	ENSG00000146950.13	SHROOM2	protein_coding	0.967548	805	6	21	0
ZH38T0000252	Intron	ENSG00000142599.19	RERE	protein_coding	0.967541	27006	72	834	0
ZH38T0023976	Proximal	ENSG00000197256.10	KANK2	protein_coding	0.967514	41338	562	826	0
ZH38T0033466	Proximal	ENSG00000163528.13	CHCHD4	protein_coding	0.96749	91302	406	2662	0
ZH38T0037677	Intron	ENSG00000164093.17	PITX2	protein_coding	0.967487	5743	0	193	0
ZH38T0024862	Intron	ENSG00000011332.19	DPF1	protein_coding	0.96748	1428	6	42	0
ZH38T0016528	Proximal	ENSG00000104154.7	SLC30A4	protein_coding	0.967338	1392	21	26	0
ZH38T0009235	Intron	ENSG00000054965.10	FAM168A	protein_coding	0.967337	1155	3	36	0
ZH38T0036455	Intron	ENSG00000145220.14	LYAR	protein_coding	0.96732	5920	18	182	0
ZH38T0040312	Proximal	ENSG00000170458.14	CD14	protein_coding	0.96732	1480	0	50	0
ZH38T0009146	Intron	ENSG00000085733.16	CTTN	protein_coding	0.967305	7278	207	39	0
ZH38T0033874	TSS	ENSG00000010282.14	HHATL	protein_coding	0.967294	13309	222	228	0
ZH38T0044648	Intron	ENSG00000196683.10	TOMM7	protein_coding	0.967268	12648	0	428	0
ZH38T0005338	Proximal	ENSG00000086475.15	SEPHS1	protein_coding	0.96726	30489	1020	12	0
ZH38T0050034	Intron	ENSG00000148123.15	PLPPR1	protein_coding	0.967197	1946	20	46	0
ZH38T0022186	Proximal	ENSG00000184640.18	2021-09-09	protein_coding	0.967177	884	0	30	0
ZH38T0036795	Proximal	ENSG00000121892.15	PDS5A	protein_coding	0.967173	28520	852	116	0
ZH38T0051981	Intergenic	ENSG00000123560.14	PLP1	protein_coding	0.967123	353	11	1	0
ZH38T0032209	Proximal	ENSG00000184702.20	2021-09-05	protein_coding	0.967114	22762	78	696	0
ZH38T0039805	Intron	ENSG00000151422.13	FER	protein_coding	0.967092	64418	1996	192	4
ZH38T0033063	Intron	ENSG00000100266.19	PACSIN2	protein_coding	0.967078	17625	245	355	0
ZH38T0026668	Proximal	ENSG00000119782.14, ENSG00000219626.9	FKBP1B , FAM228B	protein_coding, protein_coding	0.967059	3699	96	30	0
ZH38T0039368	Intron	ENSG00000131711.15	MAP1B	protein_coding	0.966982	8493	75	215	0
ZH38T0014061	Intron	ENSG00000134899.21, ENSG00000270181.3	ERCC5 , BIVM-ERCC5	protein_coding, protein_coding	0.966942	7020	0	240	0
ZH38T0006477	Proximal	ENSG00000165338.16	HECTD2	protein_coding	0.966936	85803	1953	969	12
ZH38T0020975	Intron	ENSG00000186847.6	KRT14	protein_coding	0.966903	818	0	28	0
ZH38T0007580	Intron	ENSG00000129965.15, ENSG00000284779.2	INS-IGF2 , AC132217.2	protein_coding, protein_coding	0.966898	1256	18	25	0
ZH38T0022198	Proximal	ENSG00000184640.18	2021-09-09	protein_coding	0.966895	1694	0	58	0
ZH38T0009663	Proximal	ENSG00000170290.4	SLN	protein_coding	0.966887	292	2	8	0
ZH38T0003562	Proximal	ENSG00000143226.13	FCGR2A	protein_coding	0.966865	2597	14	75	0
ZH38T0048377	Proximal	ENSG00000205002.3	AARD	protein_coding	0.966864	2451	10	74	0
ZH38T0025594	Proximal	ENSG00000104805.16	NUCB1	protein_coding	0.966803	3786	13	117	0
ZH38T0042365	Proximal	ENSG00000272325.2	NUDT3	protein_coding	0.966786	38015	893	413	0
ZH38T0000357	Proximal	ENSG00000116670.15	MAD2L2	protein_coding	0.966667	1131	24	15	0
ZH38T0035755	Proximal	ENSG00000114204.14	SERPINI2	protein_coding	0.966667	116	3	1	0
ZH38T0006712	Proximal	ENSG00000196072.12	BLOC1S2	protein_coding	0.966653	14465	261	238	0
ZH38T0003362	Proximal	ENSG00000143321.19	HDGF	protein_coding	0.966579	4396	16	136	0
ZH38T0049910	Intron	ENSG00000165140.10	FBP1	protein_coding	0.966555	1734	15	45	0
ZH38T0002427	Intron	ENSG00000215866.8	LINC01356	lncRNA	0.966527	1386	42	6	0
ZH38T0006239	Intron	ENSG00000237149.5	ZNF503-AS2	lncRNA	0.966495	1500	6	44	2
ZH38T0021162	Proximal	ENSG00000108312.15	UBTF	protein_coding	0.966464	105504	406	3255	0
ZH38T0000882	Proximal	ENSG00000169403.12	PTAFR	protein_coding	0.966463	1268	18	26	0
ZH38T0050461	Proximal	ENSG00000106992.19	AK1	protein_coding	0.966463	317	0	11	0
ZH38T0023647	Intergenic	ENSG00000105426.16	PTPRS	protein_coding	0.966421	10361	217	143	0
ZH38T0042119	Proximal	ENSG00000204463.12	BAG6	protein_coding	0.966407	15535	30	510	0
ZH38T0032866	Proximal	ENSG00000100216.6	TOMM22	protein_coding	0.966401	2186	0	76	0
ZH38T0045311	Proximal	ENSG00000106635.8	BCL7B	protein_coding	0.966342	6546	27	201	0
ZH38T0003298	Intergenic	ENSG00000196189.13	SEMA4A	protein_coding	0.96633	287	5	5	0
ZH38T0006419	Proximal	ENSG00000138134.12	STAMBPL1	protein_coding	0.96625	27198	542	408	0
ZH38T0039986	Intron	ENSG00000113368.12	LMNB1	protein_coding	0.966237	5552	40	154	0
ZH38T0007932	Proximal	ENSG00000070081.16	NUCB2	protein_coding	0.966216	2860	48	52	0
ZH38T0001442	Intergenic	ENSG00000159592.11	GPBP1L1	protein_coding	0.966149	30482	150	917	1
ZH38T0018716	Proximal	ENSG00000103490.14	PYCARD	protein_coding	0.966108	2765	0	97	0
ZH38T0006533	Intron	ENSG00000138193.15	PLCE1	protein_coding	0.966102	1026	21	15	0
ZH38T0044477	Intron	ENSG00000003147.19	ICA1	protein_coding	0.966062	8568	175	126	0
ZH38T0006128	Intron	ENSG00000122863.6	CHST3	protein_coding	0.96604	1593	2	54	0
ZH38T0016941	Proximal	ENSG00000174444.15, ENSG00000174446.13	RPL4 , SNAPC5	protein_coding, protein_coding	0.966029	275550	15	9675	0
ZH38T0038601	Proximal	ENSG00000180104.16	EXOC3	protein_coding	0.966003	5626	48	150	0
ZH38T0009691	Proximal	ENSG00000149289.11	ZC3H12C	protein_coding	0.965984	5424	19	172	0
ZH38T0001254	Intron	ENSG00000049089.15	COL9A2	protein_coding	0.965913	2692	56	39	0
ZH38T0006035	Proximal	ENSG00000060339.14	CCAR1	protein_coding	0.965891	3738	27	105	0
ZH38T0043582	Intron	ENSG00000111912.20	NCOA7	protein_coding	0.965866	4301	22	130	0
ZH38T0044930	TSS	ENSG00000211689.7, ENSG00000227191.8	TRGC1 , TRGC2	TR_C_gene, TR_C_gene	0.965854	990	19	16	0
ZH38T0043952	Proximal	ENSG00000186625.14	KATNA1	protein_coding	0.965854	396	4	10	0
ZH38T0024200	Intron	ENSG00000099797.15	TECR	protein_coding	0.965842	820	14	15	0
ZH38T0020050	Intron	ENSG00000170004.16	CHD3	protein_coding	0.965836	18800	131	534	0
ZH38T0003580	Proximal	ENSG00000162747.11	FCGR3B	protein_coding	0.965795	2880	102	0	0
ZH38T0006856	Intron	ENSG00000107960.11	STN1	protein_coding	0.965732	1240	34	10	0
ZH38T0043302	Intron	ENSG00000130349.10	C6orf203	protein_coding	0.965727	5241	3	183	0
ZH38T0027239	Intron	ENSG00000115306.16	SPTBN1	protein_coding	0.965712	9210	0	327	0
ZH38T0029502	Proximal	ENSG00000138413.13	IDH1	protein_coding	0.965712	20025	453	258	0
ZH38T0009007	Intron	ENSG00000173898.13	SPTBN2	protein_coding	0.965649	759	27	0	0
ZH38T0001704	Intron	ENSG00000162598.13	C1orf87	protein_coding	0.965649	506	6	12	0
ZH38T0016784	Intergenic	ENSG00000182718.16	ANXA2	protein_coding	0.96563	590	7	14	0
ZH38T0047481	Proximal	ENSG00000156735.11	BAG4	protein_coding	0.965577	4488	68	92	0
ZH38T0020769	TSS	ENSG00000125691.13, ENSG00000199293.1	RPL23 , SNORA21	protein_coding, snoRNA	0.965517	168	0	6	0
ZH38T0041111	Proximal	ENSG00000177932.6	ZNF354C	protein_coding	0.965505	2659	92	3	0
ZH38T0039987	Intron	ENSG00000113368.12	LMNB1	protein_coding	0.965418	670	4	20	0
ZH38T0038169	Intron	ENSG00000121211.7	MND1	protein_coding	0.965361	2564	48	44	0
ZH38T0011546	Intron	ENSG00000135476.11	ESPL1	protein_coding	0.965361	1282	18	28	0
ZH38T0029345	Intron	ENSG00000138356.14	AOX1	protein_coding	0.965361	641	1	22	0
ZH38T0024277	Proximal	ENSG00000085872.15	CHERP	protein_coding	0.965352	1616	4	54	0
ZH38T0027168	Proximal	ENSG00000138081.20	FBXO11	protein_coding	0.965349	7104	255	0	0
ZH38T0048351	Intron	ENSG00000104447.12	TRPS1	protein_coding	0.965318	1670	5	55	0
ZH38T0050714	Intron	ENSG00000186350.11	RXRA	protein_coding	0.965251	750	0	27	0
ZH38T0036677	Proximal	ENSG00000157765.13	SLC34A2	protein_coding	0.965241	2166	27	51	0
ZH38T0040977	Proximal	ENSG00000145920.15	CPLX2	protein_coding	0.965217	666	2	22	0
ZH38T0051902	Intron	ENSG00000102385.12	DRP2	protein_coding	0.965162	4876	128	48	0
ZH38T0015437	Proximal	ENSG00000258675.2	LINC02308	lncRNA	0.965149	4154	42	108	0
ZH38T0012621	Intron	ENSG00000076555.15	ACACB	protein_coding	0.965129	36672	24	1301	0
ZH38T0000093	Proximal	ENSG00000078369.18	GNB1	protein_coding	0.965118	26478	957	0	0
ZH38T0043309	Intron	ENSG00000112320.12	SOBP	protein_coding	0.965116	166	0	6	0
ZH38T0030807	Intron	ENSG00000131051.23	RBM39	protein_coding	0.965102	67256	284	2148	0
ZH38T0039051	Proximal	ENSG00000172239.14	PAIP1	protein_coding	0.965084	12604	456	0	0
ZH38T0052069	Proximal	ENSG00000077279.18	DCX	protein_coding	0.965072	11439	0	414	0
ZH38T0007620	Exon	ENSG00000205531.13	NAP1L4	protein_coding	0.96507	967	4	31	0
ZH38T0052236	Proximal	ENSG00000188706.13	ZDHHC9	protein_coding	0.965028	1021	16	21	0
ZH38T0011788	Intron	ENSG00000076108.11	BAZ2A	protein_coding	0.965	3474	0	126	0
ZH38T0009338	Proximal	ENSG00000149269.9	PAK1	protein_coding	0.964933	96200	2910	584	2
ZH38T0039604	Intron	ENSG00000081189.15	MEF2C	protein_coding	0.9649	30871	918	205	0
ZH38T0013596	Intron	ENSG00000136167.14	LCP1	protein_coding	0.964885	12200	240	204	0
ZH38T0041978	Intron	ENSG00000235781.1	LINC02569	lncRNA	0.964865	357	1	12	0
ZH38T0040170	Intron	ENSG00000152377.14	SPOCK1	protein_coding	0.964856	604	10	12	0
ZH38T0030818	Intron	ENSG00000025293.17	PHF20	protein_coding	0.964856	302	2	9	0
ZH38T0005986	Proximal	ENSG00000165476.14	REEP3	protein_coding	0.96484	8891	282	42	0
ZH38T0005327	Proximal	ENSG00000123240.17	OPTN	protein_coding	0.964754	12810	42	426	0
ZH38T0007263	TSS	ENSG00000130640.13, ENSG00000235245.1	TUBGCP2 , AL360181.2	protein_coding, lncRNA	0.964736	30039	1061	37	0
ZH38T0038107	Intron	ENSG00000198589.13	LRBA	protein_coding	0.964706	1968	24	48	0
ZH38T0021243	Proximal	ENSG00000120071.14	KANSL1	protein_coding	0.964702	16398	42	519	39
ZH38T0045370	Intron	ENSG00000127946.17	HIP1	protein_coding	0.964689	2049	24	51	0
ZH38T0013839	Proximal	ENSG00000236678.8	LINC00347	lncRNA	0.964687	601	16	6	0
ZH38T0032693	Intron	ENSG00000100320.23	RBFOX2	protein_coding	0.96467	4396	126	35	0
ZH38T0046610	Proximal	ENSG00000211751.9, ENSG00000211772.11, ENSG00000232869.2	TRBC1 , TRBC2 , TRBV29-1	TR_C_gene, TR_C_gene, TR_V_gene	0.964664	273	3	7	0
ZH38T0017256	Proximal	ENSG00000185787.14	MORF4L1	protein_coding	0.96466	7370	45	225	0
ZH38T0006858	Proximal	ENSG00000107960.11	STN1	protein_coding	0.964643	2510	46	46	0
ZH38T0019565	Proximal	ENSG00000167526.13	RPL13	protein_coding	0.964631	140568	20	5134	0
ZH38T0045361	Proximal	ENSG00000165178.9	NCF1C	unprocessed_pseudogene	0.964627	2018	35	39	0
ZH38T0037206	Proximal	ENSG00000156219.16	ART3	protein_coding	0.964623	1636	16	44	0
ZH38T0034289	Intron	ENSG00000055957.11	ITIH1	protein_coding	0.964549	1306	10	38	0
ZH38T0021824	Proximal	ENSG00000215769.8	ARHGAP27P1-BPTFP1-KPNA2P3	lncRNA	0.964539	1360	26	24	0
ZH38T0004295	Intron	ENSG00000058668.14	ATP2B4	protein_coding	0.964539	1088	2	38	0
ZH38T0049953	Proximal	ENSG00000158122.12	PRXL2C	protein_coding	0.964519	2365	42	45	0
ZH38T0006174	Proximal	ENSG00000177791.11	MYOZ1	protein_coding	0.964488	27377	966	42	0
ZH38T0004509	Proximal	ENSG00000203706.8	SERTAD4-AS1	lncRNA	0.964485	80575	356	2611	0
ZH38T0051459	Proximal	ENSG00000094631.20	HDAC6	protein_coding	0.964484	15642	54	522	0
ZH38T0003872	Intron	ENSG00000057252.13	SOAT1	protein_coding	0.964475	1276	12	35	0
ZH38T0048559	Intron	ENSG00000153317.15	ASAP1	protein_coding	0.964467	380	0	14	0
ZH38T0018371	Proximal	ENSG00000140743.8	AC092338.1	protein_coding	0.964398	2763	7	95	0
ZH38T0036813	Proximal	ENSG00000179299.17	NSUN7	protein_coding	0.96439	6608	66	178	0
ZH38T0021740	Proximal	ENSG00000011028.14	AC080038.1	protein_coding	0.964326	1730	12	52	0
ZH38T0042349	Intergenic	ENSG00000161896.12	IP6K3	protein_coding	0.964286	1242	34	12	0
ZH38T0020271	Proximal	ENSG00000133027.18	PEMT	protein_coding	0.96419	4308	125	35	0
ZH38T0013512	Intron	ENSG00000120675.6	DNAJC15	protein_coding	0.964185	2396	74	15	0
ZH38T0039270	Intron	ENSG00000153914.16	SREK1	protein_coding	0.964149	1506	6	50	0
ZH38T0029940	Intergenic	ENSG00000187514.16	PTMA	protein_coding	0.96414	3065	13	101	0
ZH38T0000216	Intron	ENSG00000171735.19	CAMTA1	protein_coding	0.964126	1075	40	0	0
ZH38T0050746	Proximal	ENSG00000130560.8	UBAC1	protein_coding	0.964082	53333	1084	903	0
ZH38T0042481	TSS	ENSG00000137168.8	PPIL1	protein_coding	0.964049	1019	0	38	0
ZH38T0049428	Intron	ENSG00000137142.5	IGFBPL1	protein_coding	0.964029	536	8	12	0
ZH38T0050753	Intergenic	ENSG00000260220.6	CCDC187	protein_coding	0.964023	1179	33	11	0
ZH38T0040716	Intergenic	ENSG00000145850.9	TIMD4	protein_coding	0.963964	321	0	12	0
ZH38T0017124	Proximal	ENSG00000179335.18	CLK3	protein_coding	0.963948	52353	1673	285	0
ZH38T0000583	Intron	ENSG00000127472.11	PLA2G5	protein_coding	0.963934	294	1	10	0
ZH38T0011686	Proximal	ENSG00000135404.11	CD63	protein_coding	0.963934	11653	28	408	0
ZH38T0044972	Intron	ENSG00000175600.15	SUGCT	protein_coding	0.963907	2724	90	12	0
ZH38T0026904	Intron	ENSG00000277893.2	SRD5A2	protein_coding	0.963899	534	16	4	0
ZH38T0047879	Proximal	ENSG00000040341.18	STAU2	protein_coding	0.963855	79200	1310	1660	0
ZH38T0006057	Intron	ENSG00000156502.14	SUPV3L1	protein_coding	0.963855	320	0	12	0
ZH38T0049728	Proximal	ENSG00000165119.21	HNRNPK	protein_coding	0.963853	16239	396	213	0
ZH38T0001621	Intron	ENSG00000157216.15	SSBP3	protein_coding	0.963812	3995	55	95	0
ZH38T0033037	Intergenic	ENSG00000100207.18	TCF20	protein_coding	0.963808	1731	11	54	0
ZH38T0004650	Proximal	ENSG00000143507.18	DUSP10	protein_coding	0.963808	1225	0	46	0
ZH38T0019779	Proximal	ENSG00000161905.12	ALOX15	protein_coding	0.963799	2689	75	26	0
ZH38T0013517	Intron	ENSG00000120658.13	ENOX1	protein_coding	0.963795	772	13	16	0
ZH38T0027645	Proximal	ENSG00000115274.15, ENSG00000274049.4	INO80B , INO80B-WBP1	protein_coding, protein_coding	0.963768	1197	18	27	0
ZH38T0027820	Proximal	ENSG00000222041.11, ENSG00000284879.1	CYTOR , AC133644.3	lncRNA, lncRNA	0.963748	1728	33	32	0
ZH38T0035609	Proximal	ENSG00000196549.10	MME	protein_coding	0.963746	191478	1575	5628	0
ZH38T0052067	Proximal	ENSG00000077279.18	DCX	protein_coding	0.963739	15309	9	567	0
ZH38T0045078	Intron	ENSG00000164742.16	ADCY1	protein_coding	0.963731	186	4	3	0
ZH38T0011559	Intron	ENSG00000135409.11	AMHR2	protein_coding	0.963691	19110	198	522	0
ZH38T0052316	Proximal	ENSG00000169446.5	MMGT1	protein_coding	0.96369	49950	99	1783	0
ZH38T0035662	Intron	ENSG00000197415.12	VEPH1	protein_coding	0.963636	2226	48	36	0
ZH38T0024215	Proximal	ENSG00000105143.12	SLC1A6	protein_coding	0.963636	848	2	30	0
ZH38T0003193	Intron	ENSG00000273088.2	AL713999.1	protein_coding	0.963578	13572	99	414	0
ZH38T0037112	Intron	ENSG00000080493.17	SLC4A4	protein_coding	0.96357	2116	56	24	0
ZH38T0000327	Intron	ENSG00000130940.15	CASZ1	protein_coding	0.963563	12006	74	380	0
ZH38T0035499	Proximal	ENSG00000163762.7	TM4SF18	protein_coding	0.963546	2326	76	12	0
ZH38T0037512	Proximal	ENSG00000182168.15	UNC5C	protein_coding	0.963452	14235	201	339	0
ZH38T0028919	Proximal	ENSG00000071967.12	CYBRD1	protein_coding	0.963447	7512	162	123	0
ZH38T0005561	Proximal	ENSG00000169126.15	ARMC4	protein_coding	0.963362	894	20	14	0
ZH38T0038090	Intron	ENSG00000071205.11	ARHGAP10	protein_coding	0.963343	657	20	5	0
ZH38T0020268	Proximal	ENSG00000133027.18	PEMT	protein_coding	0.963303	420	0	16	0
ZH38T0009226	Proximal	ENSG00000175591.11	P2RY2	protein_coding	0.963293	2598	18	81	0
ZH38T0018291	Intron	ENSG00000103544.14	VPS35L	protein_coding	0.963286	18576	96	612	0
ZH38T0019569	Proximal	ENSG00000015413.9	DPEP1	protein_coding	0.963279	11385	234	200	0
ZH38T0035681	Proximal	ENSG00000118849.10	RARRES1	protein_coding	0.963257	5820	176	46	0
ZH38T0018936	Proximal	ENSG00000205336.11	ADGRG1	protein_coding	0.963213	10683	147	261	0
ZH38T0050501	Proximal	ENSG00000167114.13	SLC27A4	protein_coding	0.963119	16426	87	542	0
ZH38T0032778	Proximal	ENSG00000100079.7	LGALS2	protein_coding	0.963073	4877	156	31	0
ZH38T0027807	Intron	ENSG00000115561.16, ENSG00000249884.8	CHMP3 , RNF103-CHMP3	protein_coding, protein_coding	0.962963	832	8	24	0
ZH38T0010057	Proximal	ENSG00000255248.9	MIR100HG	lncRNA	0.962963	598	14	9	0
ZH38T0004600	Intron	ENSG00000162814.11	SPATA17	protein_coding	0.962963	130	2	3	0
ZH38T0048392	Proximal	ENSG00000147676.14	MAL2	protein_coding	0.962857	1011	15	24	0
ZH38T0037828	Proximal	ENSG00000138685.15	FGF2	protein_coding	0.962814	7664	20	276	0
ZH38T0022317	Intron	ENSG00000141564.15	RPTOR	protein_coding	0.962756	4653	81	99	0
ZH38T0028882	Intron	ENSG00000154479.13	CCDC173	protein_coding	0.962667	361	8	6	0
ZH38T0030816	Intron	ENSG00000025293.17	PHF20	protein_coding	0.962656	232	0	9	0
ZH38T0002577	Intron	ENSG00000134193.15	REG4	protein_coding	0.96264	2319	30	60	0
ZH38T0001298	Proximal	ENSG00000127125.9, ENSG00000186409.17	PPCS , CCDC30	protein_coding, protein_coding	0.962612	6900	180	88	0
ZH38T0029876	Intron	ENSG00000153827.13	TRIP12	protein_coding	0.9625	924	30	6	0
ZH38T0044740	Exon	ENSG00000105997.22, ENSG00000197576.13	HOXA3 , HOXA4	protein_coding, protein_coding	0.962479	5079	36	162	0
ZH38T0021944	Intron	ENSG00000153822.13	KCNJ16	protein_coding	0.96247	795	0	31	0
ZH38T0040166	TSS	ENSG00000113658.18	SMAD5	protein_coding	0.962422	461	6	12	0
ZH38T0040682	Proximal	ENSG00000164574.16	GALNT10	protein_coding	0.962413	2919	51	63	0
ZH38T0037789	Proximal	ENSG00000164109.14	MAD2L1	protein_coding	0.962406	1024	6	34	0
ZH38T0042065	Proximal	ENSG00000204525.16	HLA-C	protein_coding	0.962382	20415	6	792	0
ZH38T0041936	Proximal	ENSG00000206503.13, ENSG00000235290.1	HLA-A , HLA-W	protein_coding, unprocessed_pseudogene	0.962366	537	6	2	13
ZH38T0024606	Proximal	ENSG00000105220.17	GPI	protein_coding	0.962336	22178	132	736	0
ZH38T0018833	Intergenic	ENSG00000166971.17	AKTIP	protein_coding	0.962298	1072	3	39	0
ZH38T0044300	Proximal	ENSG00000105963.15	ADAP1	protein_coding	0.962289	4440	171	3	0
ZH38T0016704	Intergenic	ENSG00000151575.14	TEX9	protein_coding	0.962264	204	5	3	0
ZH38T0039313	Proximal	ENSG00000134057.15	CCNB1	protein_coding	0.962238	2115	5	78	0
ZH38T0048146	Intron	ENSG00000104324.16	CPQ	protein_coding	0.962236	637	6	19	0
ZH38T0034123	Proximal	ENSG00000173531.15	MST1	protein_coding	0.962196	11988	397	74	0
ZH38T0022657	Proximal	ENSG00000141404.16	GNAL	protein_coding	0.962194	1807	12	59	0
ZH38T0015722	Intron	ENSG00000254656.2	RTL1	protein_coding	0.962134	2795	5	105	0
ZH38T0016885	Intron	ENSG00000166831.9	RBPMS2	protein_coding	0.962085	8932	292	60	0
ZH38T0003499	Intron	ENSG00000179914.5	ITLN1	protein_coding	0.962085	609	10	14	0
ZH38T0026099	Intron	ENSG00000080031.10	AC010327.1	protein_coding	0.962085	406	10	6	0
ZH38T0015882	Proximal	ENSG00000213145.9, ENSG00000257341.5	CRIP1 , AL928654.3	protein_coding, protein_coding	0.962068	63204	636	1856	0
ZH38T0016354	Proximal	ENSG00000128908.17	INO80	protein_coding	0.96205	19089	603	150	0
ZH38T0038285	Intron	ENSG00000109511.11	ANXA10	protein_coding	0.962049	507	15	5	0
ZH38T0050761	Proximal	ENSG00000148396.18, ENSG00000165684.4	SEC16A , SNAPC4	protein_coding, protein_coding	0.962035	37807	457	1034	1
ZH38T0005789	Proximal	ENSG00000230501.1, ENSG00000243349.2	ANKRD30BP3 , AL358394.2	unprocessed_pseudogene, lncRNA	0.962025	1064	31	11	0
ZH38T0045368	Proximal	ENSG00000127957.18, ENSG00000242073.2	PMS2P3 , AC211429.1	transcribed_unprocessed_pseudogene, transcribed_unprocessed_pseudogene	0.962025	684	11	16	0
ZH38T0009061	Proximal	ENSG00000084207.17	GSTP1	protein_coding	0.962001	13772	138	406	0
ZH38T0039068	Proximal	ENSG00000151883.18	PARP8	protein_coding	0.961892	15069	448	149	0
ZH38T0040808	Intron	ENSG00000145864.12	GABRB2	protein_coding	0.961881	6056	160	80	0
ZH38T0033414	Proximal	ENSG00000144560.15	VGLL4	protein_coding	0.961874	883	9	26	0
ZH38T0005018	Intergenic	ENSG00000117020.17	AKT3	protein_coding	0.961864	908	23	13	0
ZH38T0029212	Proximal	ENSG00000151689.13	INPP1	protein_coding	0.96186	22546	818	74	2
ZH38T0029875	Intron	ENSG00000153827.13	TRIP12	protein_coding	0.961837	17088	183	495	0
ZH38T0028772	Proximal	ENSG00000153250.20	RBMS1	protein_coding	0.961823	9750	321	66	0
ZH38T0025650	Intron	ENSG00000104888.10	SLC17A7	protein_coding	0.961783	302	0	12	0
ZH38T0008017	Proximal	ENSG00000166833.21	NAV2	protein_coding	0.961763	8401	159	175	0
ZH38T0034244	Intron	ENSG00000247596.9	TWF2	protein_coding	0.961749	2816	10	102	0
ZH38T0025318	Intron	ENSG00000104859.15	CLASRP	protein_coding	0.96173	1734	18	51	0
ZH38T0001701	Proximal	ENSG00000134709.11	HOOK1	protein_coding	0.961722	1407	27	29	0
ZH38T0015356	Proximal	ENSG00000013523.9	ANGEL1	protein_coding	0.961703	11225	306	141	0
ZH38T0050266	Intron	ENSG00000136861.18	CDK5RAP2	protein_coding	0.961661	6321	48	204	0
ZH38T0003717	TSS	ENSG00000171806.12	METTL18	protein_coding	0.961661	4214	4	164	0
ZH38T0037739	Intron	ENSG00000154608.14	CEP170P1	transcribed_unprocessed_pseudogene	0.961655	1906	44	32	0
ZH38T0005957	Proximal	ENSG00000183346.7	CABCOCO1	protein_coding	0.961598	2504	40	60	0
ZH38T0005669	Intron	ENSG00000216937.13	CCDC7	protein_coding	0.961538	3250	96	34	0
ZH38T0018124	Proximal	ENSG00000122299.12	ZC3H7A	protein_coding	0.961538	1100	32	12	0
ZH38T0045714	Intron	ENSG00000241685.10, ENSG00000284292.1	ARPC1A , AC004922.1	protein_coding, protein_coding	0.961538	400	8	8	0
ZH38T0002101	Proximal	ENSG00000162676.12	GFI1	protein_coding	0.961538	150	0	6	0
ZH38T0003141	Intron	ENSG00000143603.19	KCNN3	protein_coding	0.961489	2996	0	120	0
ZH38T0042837	Intron	ENSG00000235899.2	LINC01564	lncRNA	0.961481	649	20	6	0
ZH38T0000044	Proximal	ENSG00000169972.12	PUSL1	protein_coding	0.961456	4914	43	154	0
ZH38T0024711	Proximal	ENSG00000105675.8	ATP4A	protein_coding	0.961424	324	1	12	0
ZH38T0042801	Proximal	ENSG00000112118.19	MCM3	protein_coding	0.961418	221676	5704	3192	0
ZH38T0045425	Proximal	ENSG00000127947.16	PTPN12	protein_coding	0.96139	8217	183	147	0
ZH38T0021674	Intron	ENSG00000062716.13	VMP1	protein_coding	0.96139	249	0	10	0
ZH38T0051689	Intron	ENSG00000120498.13	TEX11	protein_coding	0.961353	1592	60	4	0
ZH38T0022794	Intron	ENSG00000198795.11	ZNF521	protein_coding	0.961347	7138	87	200	0
ZH38T0030296	Intron	ENSG00000088881.20	EBF4	protein_coding	0.96134	746	0	30	0
ZH38T0025470	Intron	ENSG00000105321.14	CCDC9	protein_coding	0.96133	2486	4	96	0
ZH38T0005253	Proximal	ENSG00000065675.14	PRKCQ	protein_coding	0.961326	14094	564	3	0
ZH38T0023664	Intron	ENSG00000174898.16	CATSPERD	protein_coding	0.961326	348	4	10	0
ZH38T0012615	Proximal	ENSG00000076248.10	UNG	protein_coding	0.961277	19760	24	772	0
ZH38T0032084	Intron	ENSG00000142173.15	COL6A2	protein_coding	0.96121	13976	32	532	0
ZH38T0033217	Intron	ENSG00000185386.15	MAPK11	protein_coding	0.961207	669	12	15	0
ZH38T0018206	Proximal	ENSG00000133392.18	MYH11	protein_coding	0.961192	19517	31	757	0
ZH38T0014666	Proximal	ENSG00000151327.12	FAM177A1	protein_coding	0.96118	8666	8	342	0
ZH38T0050140	Intron	ENSG00000157654.17, ENSG00000241978.9	PALM2-AKAP2 , AKAP2	protein_coding, protein_coding	0.961152	10515	75	350	0
ZH38T0023997	Intron	ENSG00000198003.12	CCDC151	protein_coding	0.961148	4824	39	156	0
ZH38T0018659	Proximal	ENSG00000080603.17	SRCAP	protein_coding	0.961111	692	10	18	0
ZH38T0022988	Proximal	ENSG00000175387.16	SMAD2	protein_coding	0.9611	151008	4188	1924	0
ZH38T0026831	Intron	ENSG00000075426.12	FOSL2	protein_coding	0.961073	3654	60	88	0
ZH38T0049758	Intron	ENSG00000135052.16	GOLM1	protein_coding	0.961051	2122	36	50	0
ZH38T0029743	Proximal	ENSG00000135924.15	DNAJB2	protein_coding	0.961019	57788	1306	1038	0
ZH38T0020267	Intron	ENSG00000133027.18	PEMT	protein_coding	0.960976	1182	0	48	0
ZH38T0009026	Proximal	ENSG00000173020.11	GRK2	protein_coding	0.960927	5804	74	162	0
ZH38T0033054	Proximal	ENSG00000100243.21	CYB5R3	protein_coding	0.960921	7426	256	46	0
ZH38T0000846	Intron	ENSG00000090273.14	NUDC	protein_coding	0.960912	295	0	12	0
ZH38T0038300	Intron	ENSG00000129116.19	PALLD	protein_coding	0.960894	688	0	28	0
ZH38T0000586	Intergenic	ENSG00000162543.6	UBXN10	protein_coding	0.960854	270	1	10	0
ZH38T0046028	Proximal	ENSG00000105835.12	NAMPT	protein_coding	0.96084	7091	124	165	0
ZH38T0032210	Proximal	ENSG00000184702.20	2021-09-05	protein_coding	0.960818	1128	10	36	0
ZH38T0019030	Proximal	ENSG00000172840.6	PDP2	protein_coding	0.960776	36399	366	1120	0
ZH38T0051306	Intron	ENSG00000156298.12, ENSG00000250349.3	TSPAN7 , AF241726.2	protein_coding, protein_coding	0.960744	4185	24	147	0
ZH38T0014088	Proximal	ENSG00000174405.13	LIG4	protein_coding	0.96069	2786	0	114	0
ZH38T0036518	Intron	ENSG00000163995.20	ABLIM2	protein_coding	0.960674	1368	0	56	0
ZH38T0028055	Proximal	ENSG00000115539.14	PDCL3	protein_coding	0.960666	6863	13	268	0
ZH38T0035658	Intron	ENSG00000197415.12	VEPH1	protein_coding	0.960661	5055	36	171	0
ZH38T0049478	Proximal	ENSG00000227449.8	FGF7P6	transcribed_unprocessed_pseudogene	0.960644	23286	867	24	63
ZH38T0019969	Proximal	ENSG00000187838.17	PLSCR3	protein_coding	0.960563	2728	0	112	0
ZH38T0045957	Intron	ENSG00000161040.16, ENSG00000286830.1	FBXL13 , AC105052.5	protein_coding, lncRNA	0.960539	5988	174	72	0
ZH38T0010068	Proximal	ENSG00000109944.10	JHY	protein_coding	0.960526	1898	0	78	0
ZH38T0002708	Intron	ENSG00000283342.1	AC241584.2	unprocessed_pseudogene	0.960486	948	32	7	0
ZH38T0043788	Proximal	ENSG00000118503.15	TNFAIP3	protein_coding	0.960457	4372	52	128	0
ZH38T0044807	Proximal	ENSG00000180354.16	MTURN	protein_coding	0.960424	13590	80	480	0
ZH38T0044751	Proximal	ENSG00000253293.5, ENSG00000257184.3	HOXA10 , AC004080.3	protein_coding, protein_coding	0.960414	5192	2	212	0
ZH38T0048726	Intron	ENSG00000181135.16	ZNF707	protein_coding	0.960388	2473	5	97	0
ZH38T0000676	Proximal	ENSG00000125945.15	ZNF436	protein_coding	0.960369	4168	8	164	0
ZH38T0004608	Proximal	ENSG00000232480.1	TGFB2-AS1	lncRNA	0.960345	557	10	13	0
ZH38T0001244	Intron	ENSG00000131236.17	CAP1	protein_coding	0.96034	2034	0	84	0
ZH38T0035409	Intron	ENSG00000114127.10	XRN1	protein_coding	0.96034	678	6	22	0
ZH38T0041656	Intron	ENSG00000272168.8	CASC15	lncRNA	0.960336	60287	660	1830	0
ZH38T0043584	Intron	ENSG00000111912.20	NCOA7	protein_coding	0.9603	3580	20	128	0
ZH38T0004053	Intron	ENSG00000150681.10	RGS18	protein_coding	0.960265	290	10	2	0
ZH38T0007691	Proximal	ENSG00000110171.20	TRIM3	protein_coding	0.96025	35994	672	818	0
ZH38T0042258	Proximal	ENSG00000204256.13, ENSG00000223837.2	BRD2 , AL645941.1	protein_coding, lncRNA	0.960241	8139	4	333	0
ZH38T0001086	Intron	ENSG00000126067.12	PSMB2	protein_coding	0.96024	3526	0	146	0
ZH38T0000074	Proximal	ENSG00000189339.11	SLC35E2B	protein_coding	0.96018	18519	144	624	0
ZH38T0032859	Intergenic	ENSG00000100201.21	DDX17	protein_coding	0.960177	217	0	9	0
ZH38T0048373	Proximal	ENSG00000164754.14	RAD21	protein_coding	0.960176	24496	950	66	0
ZH38T0044279	Intron	ENSG00000197461.13	PDGFA	protein_coding	0.960154	1494	0	62	0
ZH38T0049767	Intron	ENSG00000083223.18	TUT7	protein_coding	0.960139	2216	4	88	0
ZH38T0035283	Proximal	ENSG00000163781.13	TOPBP1	protein_coding	0.960125	12280	48	462	0
ZH38T0009941	Intron	ENSG00000019144.19	PHLDB1	protein_coding	0.960123	5008	156	52	0
ZH38T0041475	Intron	ENSG00000224531.6, ENSG00000230314.7	SMIM13 , ELOVL2-AS1	protein_coding, lncRNA	0.960123	313	6	7	0
ZH38T0014406	Intron	ENSG00000092068.20	SLC7A8	protein_coding	0.960114	1348	30	26	0
ZH38T0003572	Proximal	ENSG00000203747.11	FCGR3A	protein_coding	0.960097	5534	132	98	0
ZH38T0013562	Proximal	ENSG00000133112.16	TPT1	protein_coding	0.96006	481470	0	20030	0
ZH38T0012658	Intron	ENSG00000122970.16	IFT81	protein_coding	0.960014	5474	78	150	0
ZH38T0047100	Intron	ENSG00000078674.17	PCM1	protein_coding	0.959958	3644	28	124	0
ZH38T0025246	Proximal	ENSG00000159871.15	LYPD5	protein_coding	0.959938	1869	7	71	0
ZH38T0003046	Intergenic	ENSG00000188015.10, ENSG00000196154.12	S100A3 , S100A4	protein_coding, protein_coding	0.959885	335	3	11	0
ZH38T0002061	Proximal	ENSG00000171492.14	LRRC8D	protein_coding	0.95986	2200	88	4	0
ZH38T0031679	Intron	ENSG00000156299.13	TIAM1	protein_coding	0.959821	430	4	14	0
ZH38T0019858	Intron	ENSG00000029725.17	RABEP1	protein_coding	0.959745	1955	24	58	0
ZH38T0002615	Proximal	ENSG00000265531.3	FCGR1CP	unprocessed_pseudogene	0.959722	691	18	11	0
ZH38T0050269	Intron	ENSG00000136861.18	CDK5RAP2	protein_coding	0.959721	3717	12	144	0
ZH38T0029644	Intron	ENSG00000079308.19	TNS1	protein_coding	0.959719	33594	246	1164	0
ZH38T0033200	Intron	ENSG00000184164.14	CRELD2	protein_coding	0.959716	1620	0	68	0
ZH38T0010129	Intron	ENSG00000149557.13	FEZ1	protein_coding	0.959703	1810	0	76	0
ZH38T0038592	Proximal	ENSG00000164366.3, ENSG00000260774.1	CCDC127 , AC021087.3	protein_coding, lncRNA	0.959593	37000	90	1468	0
ZH38T0033471	Intron	ENSG00000154767.14	XPC	protein_coding	0.959581	1923	14	67	0
ZH38T0051292	Proximal	ENSG00000165169.11	DYNLT3	protein_coding	0.959565	1851	39	39	0
ZH38T0047476	Proximal	ENSG00000147465.11	STAR	protein_coding	0.959559	3393	40	103	0
ZH38T0004072	Intron	ENSG00000116747.12	RO60	protein_coding	0.959514	1659	7	63	0
ZH38T0048352	Intron	ENSG00000104447.12	TRPS1	protein_coding	0.959514	1185	0	50	0
ZH38T0003265	Proximal	ENSG00000116584.18	ARHGEF2	protein_coding	0.959462	5136	82	135	0
ZH38T0051493	Intron	ENSG00000189064.8, ENSG00000205777.17	GAGE2A , GAGE1	protein_coding, protein_coding	0.959459	639	2	25	0
ZH38T0048155	Intron	ENSG00000104341.16	LAPTM4B	protein_coding	0.959459	426	9	9	0
ZH38T0008725	Proximal	ENSG00000072518.20	MARK2	protein_coding	0.959439	2531	44	63	0
ZH38T0040597	Proximal	ENSG00000164591.13	MYOZ3	protein_coding	0.95941	1040	14	30	0
ZH38T0050273	Intron	ENSG00000136861.18	CDK5RAP2	protein_coding	0.95935	2832	36	84	0
ZH38T0015410	Intron	ENSG00000100629.17	CEP128	protein_coding	0.959302	2475	39	66	0
ZH38T0007154	Intron	ENSG00000213185.7, ENSG00000286088.1	FAM24B , AC073585.2	protein_coding, protein_coding	0.959302	1980	0	84	0
ZH38T0039545	Intron	ENSG00000152422.15	XRCC4	protein_coding	0.959267	1884	16	64	0
ZH38T0040990	Proximal	ENSG00000146066.3	HIGD2A	protein_coding	0.959198	1387	0	59	0
ZH38T0047876	Intron	ENSG00000040341.18	STAU2	protein_coding	0.959184	5170	160	60	0
ZH38T0029238	Intron	ENSG00000173559.12	NABP1	protein_coding	0.959176	2420	0	103	0
ZH38T0049235	Proximal	ENSG00000137073.21	UBAP2	protein_coding	0.959093	13786	506	82	0
ZH38T0013281	Proximal	ENSG00000122026.10	RPL21	protein_coding	0.959025	10860	116	348	0
ZH38T0012290	Proximal	ENSG00000070961.15	ATP2B1	protein_coding	0.958999	33096	490	925	0
ZH38T0045419	Intron	ENSG00000186088.16	GSAP	protein_coding	0.958974	2618	78	34	0
ZH38T0032578	Intron	ENSG00000183963.18	SMTN	protein_coding	0.958974	2244	12	84	0
ZH38T0050580	Intron	ENSG00000167157.11	PRRX2	protein_coding	0.958972	1753	3	72	0
ZH38T0033679	Proximal	ENSG00000152642.10	GPD1L	protein_coding	0.958944	51992	1808	418	0
ZH38T0007361	Proximal	ENSG00000177106.16	EPS8L2	protein_coding	0.958937	1191	5	46	0
ZH38T0003967	Intron	ENSG00000116701.14	NCF2	protein_coding	0.958904	2240	8	88	0
ZH38T0004697	Proximal	ENSG00000143514.17	TP53BP2	protein_coding	0.958848	1398	52	8	0
ZH38T0049754	Intron	ENSG00000135052.16	GOLM1	protein_coding	0.958848	466	6	14	0
ZH38T0052380	Proximal	ENSG00000179542.16	SLITRK4	protein_coding	0.958831	14463	30	591	0
ZH38T0018297	Intron	ENSG00000167191.12	GPRC5B	protein_coding	0.958788	7724	0	332	0
ZH38T0019085	Intron	ENSG00000176387.7	HSD11B2	protein_coding	0.958779	1256	0	54	0
ZH38T0032262	Proximal	ENSG00000099940.12	SNAP29	protein_coding	0.958763	186	4	4	0
ZH38T0008004	Proximal	ENSG00000129173.13	E2F8	protein_coding	0.958716	1881	24	57	0
ZH38T0023451	Proximal	ENSG00000133275.16	CSNK1G2	protein_coding	0.958707	1068	29	17	0
ZH38T0020008	Intron	ENSG00000129226.14, ENSG00000264772.6	CD68 , AC016876.2	protein_coding, lncRNA	0.958678	1044	0	45	0
ZH38T0030868	Proximal	ENSG00000101353.14	MROH8	protein_coding	0.958673	7284	98	216	0
ZH38T0029371	Proximal	ENSG00000003402.20	CFLAR	protein_coding	0.958623	8271	93	264	0
ZH38T0036379	Proximal	ENSG00000163945.16	UVSSA	protein_coding	0.958621	10842	387	81	0
ZH38T0021310	Intron	ENSG00000082641.16	NFE2L1	protein_coding	0.95858	648	0	28	0
ZH38T0045998	Proximal	ENSG00000135250.17	SRPK2	protein_coding	0.958572	4512	122	73	0
ZH38T0009739	Proximal	ENSG00000109846.8	CRYAB	protein_coding	0.958557	6430	0	278	0
ZH38T0037698	Intron	ENSG00000174720.16	LARP7	protein_coding	0.958506	924	8	32	0
ZH38T0031828	Proximal	ENSG00000157540.21	DYRK1A	protein_coding	0.958499	15936	684	6	0
ZH38T0036985	Proximal	ENSG00000128050.8	PAICS	protein_coding	0.958489	7204	164	148	0
ZH38T0007300	Intergenic	ENSG00000255026.1	AC136475.3	lncRNA	0.958466	300	0	13	0
ZH38T0017523	Intron	ENSG00000185518.11	SV2B	protein_coding	0.958416	968	24	18	0
ZH38T0030832	Proximal	ENSG00000080845.17	DLGAP4	protein_coding	0.958388	57210	2290	194	0
ZH38T0029728	Proximal	ENSG00000158552.13	ZFAND2B	protein_coding	0.958367	21477	0	933	0
ZH38T0004555	Proximal	ENSG00000123685.9	BATF3	protein_coding	0.958358	3176	106	32	0
ZH38T0013999	Proximal	ENSG00000102572.14	STK24	protein_coding	0.958301	4964	140	76	0
ZH38T0013740	Proximal	ENSG00000165416.14	SUGT1	protein_coding	0.958271	6430	98	182	0
ZH38T0050264	Intron	ENSG00000136861.18	CDK5RAP2	protein_coding	0.958271	1929	33	51	0
ZH38T0031160	Proximal	ENSG00000124201.15	ZNFX1	protein_coding	0.958209	1926	3	81	0
ZH38T0015642	Intron	ENSG00000165959.12, ENSG00000176438.12	CLMN , SYNE3	protein_coding, protein_coding	0.958193	18771	813	6	0
ZH38T0038477	Intron	ENSG00000151726.14	ACSL1	protein_coding	0.958167	3367	70	77	0
ZH38T0034279	Intron	ENSG00000163939.18	PBRM1	protein_coding	0.958153	1992	35	52	0
ZH38T0006193	Proximal	ENSG00000172586.8	CHCHD1	protein_coding	0.958145	4235	0	185	0
ZH38T0017701	Proximal	ENSG00000130656.5	HBZ	protein_coding	0.958145	847	0	37	0
ZH38T0004069	TSS	ENSG00000116747.12, ENSG00000134371.13, ENSG00000232077.2, ENSG00000286285.1	RO60 , CDC73 , LINC01031 , AL138778.1	protein_coding, protein_coding, lncRNA, lncRNA	0.958138	303676	534	12732	2
ZH38T0012944	Proximal	ENSG00000130779.20	CLIP1	protein_coding	0.958126	5400	116	120	0
ZH38T0021595	Proximal	ENSG00000153944.11	MSI2	protein_coding	0.958121	7893	108	237	0
ZH38T0007334	Proximal	ENSG00000174775.17	HRAS	protein_coding	0.958116	20245	40	845	0
ZH38T0016727	Intron	ENSG00000128849.10	CGNL1	protein_coding	0.958106	526	1	22	0
ZH38T0040929	Intergenic	ENSG00000037241.7, ENSG00000254295.1	RPL26L1 , AC008429.3	protein_coding, lncRNA	0.958101	343	11	4	0
ZH38T0032429	Intron	ENSG00000197077.13	KIAA1671	protein_coding	0.958084	320	0	14	0
ZH38T0030752	Proximal	ENSG00000125966.10	MMP24	protein_coding	0.958057	1302	7	50	0
ZH38T0000425	Intron	ENSG00000142621.19	FHAD1	protein_coding	0.957983	684	18	12	0
ZH38T0052010	Proximal	ENSG00000080572.12	PIH1D3	protein_coding	0.957983	342	6	9	0
ZH38T0029231	Proximal	ENSG00000128641.19	MYO1B	protein_coding	0.957958	1914	39	45	0
ZH38T0045098	Intron	ENSG00000136205.17	TNS3	protein_coding	0.957916	3824	30	138	0
ZH38T0017994	Proximal	ENSG00000090447.12	TFAP4	protein_coding	0.9579	15381	45	630	1
ZH38T0052130	Intron	ENSG00000250423.2	KIAA1210	protein_coding	0.957896	5756	93	160	0
ZH38T0043765	Proximal	ENSG00000135525.18	MAP7	protein_coding	0.95774	257472	10230	1131	0
ZH38T0031701	Intron	ENSG00000159079.19, ENSG00000265590.9	CFAP298 , C21orf59-TCP10L	protein_coding, protein_coding	0.957724	7272	6	315	0
ZH38T0042564	Proximal	ENSG00000112561.18	TFEB	protein_coding	0.95769	20100	150	738	0
ZH38T0013013	Proximal	ENSG00000179195.16, ENSG00000274874.2	ZNF664 , AC068790.8	protein_coding, lncRNA	0.957685	2648	80	37	0
ZH38T0024072	Proximal	ENSG00000105576.15	TNPO2	protein_coding	0.95757	5123	155	72	0
ZH38T0032565	Intron	ENSG00000183963.18	SMTN	protein_coding	0.957547	1015	0	45	0
ZH38T0005652	Intron	ENSG00000165322.17	ARHGAP12	protein_coding	0.957522	13525	25	575	0
ZH38T0047022	Proximal	ENSG00000079459.13	FDFT1	protein_coding	0.957466	12561	150	408	0
ZH38T0024590	Intron	ENSG00000124299.15	PEPD	protein_coding	0.957364	2964	39	93	0
ZH38T0037552	Intron	ENSG00000164032.12	H2AFZ	protein_coding	0.957359	1392	0	62	0
ZH38T0051449	Proximal	ENSG00000015285.10	WAS	protein_coding	0.957354	3300	39	108	0
ZH38T0027569	Intron	ENSG00000144036.15	EXOC6B	protein_coding	0.95735	3165	48	93	0
ZH38T0030143	Proximal	ENSG00000130294.16	KIF1A	protein_coding	0.957338	6732	0	300	0
ZH38T0014115	Intron	ENSG00000134871.18	COL4A2	protein_coding	0.957332	3186	34	108	0
ZH38T0044031	Proximal	ENSG00000112031.16	MTRF1L	protein_coding	0.957326	6057	240	30	0
ZH38T0020724	Proximal	ENSG00000276023.5	DUSP14	protein_coding	0.957286	3048	20	116	0
ZH38T0017028	Intron	ENSG00000137821.11	LRRC49	protein_coding	0.957237	1746	24	54	0
ZH38T0017563	Intron	ENSG00000173575.21	CHD2	protein_coding	0.957198	2952	24	108	0
ZH38T0016146	Intron	ENSG00000169926.11	KLF13	protein_coding	0.957198	2460	0	110	0
ZH38T0044644	Proximal	ENSG00000136244.12	IL6	protein_coding	0.957166	36692	186	1456	0
ZH38T0012679	Intergenic	ENSG00000122986.13	HVCN1	protein_coding	0.957143	1675	50	25	0
ZH38T0029109	Intron	ENSG00000138434.17	ITPRID2	protein_coding	0.957133	8172	39	327	0
ZH38T0025023	Intron	ENSG00000105221.17	AKT2	protein_coding	0.957031	735	3	30	0
ZH38T0019062	Intron	ENSG00000205250.9	E2F4	protein_coding	0.956962	378	1	16	0
ZH38T0002063	Intron	ENSG00000171492.14, ENSG00000271949.1	LRRC8D , AC093423.3	protein_coding, protein_coding	0.956959	12273	243	309	0
ZH38T0017848	Proximal	ENSG00000103197.18	TSC2	protein_coding	0.956932	12976	525	59	0
ZH38T0005612	Proximal	ENSG00000165757.9	JCAD	protein_coding	0.956924	14573	618	38	0
ZH38T0007386	Intron	ENSG00000177685.17	CRACR2B	protein_coding	0.956922	2288	19	84	0
ZH38T0032179	Proximal	ENSG00000184979.9	USP18	protein_coding	0.956916	8240	249	122	0
ZH38T0042828	Proximal	ENSG00000112146.16	FBXO9	protein_coding	0.956904	1088	49	0	0
ZH38T0022200	Intron	ENSG00000184640.18	2021-09-09	protein_coding	0.956864	34605	75	1485	0
ZH38T0013104	Intron	ENSG00000111452.13	ADGRD1	protein_coding	0.956863	488	12	10	0
ZH38T0027521	Intron	ENSG00000075340.23	ADD2	protein_coding	0.956825	7535	275	65	0
ZH38T0016819	Intron	ENSG00000140416.21	TPM1	protein_coding	0.956739	367980	990	15649	0
ZH38T0028364	Intron	ENSG00000136717.15	BIN1	protein_coding	0.956735	23595	110	957	0
ZH38T0029980	Intron	ENSG00000204120.14	GIGYF2	protein_coding	0.956707	8088	0	366	0
ZH38T0013507	Intron	ENSG00000133106.14	EPSTI1	protein_coding	0.956701	1392	18	45	0
ZH38T0040100	Intergenic	ENSG00000251616.1	AC113410.2	lncRNA	0.95661	1411	5	59	0
ZH38T0013286	Intron	ENSG00000122035.6	RASL11A	protein_coding	0.95656	1079	0	49	0
ZH38T0010156	Proximal	ENSG00000110080.18	ST3GAL4	protein_coding	0.956543	7836	252	104	0
ZH38T0021505	Proximal	ENSG00000154945.7	ANKRD40	protein_coding	0.956527	15094	59	627	0
ZH38T0001462	Intron	ENSG00000085998.14	POMGNT1	protein_coding	0.956522	462	0	21	0
ZH38T0051674	Proximal	ENSG00000184210.5	DGAT2L6	protein_coding	0.956522	66	1	2	0
ZH38T0039440	Proximal	ENSG00000145703.16	IQGAP2	protein_coding	0.9565	1935	53	35	0
ZH38T0001318	Proximal	ENSG00000177868.12	SVBP	protein_coding	0.956472	3340	32	120	0
ZH38T0018263	Intron	ENSG00000157106.16	SMG1	protein_coding	0.956464	5734	70	190	1
ZH38T0049990	Intron	ENSG00000136938.9	ANP32B	protein_coding	0.956376	285	1	12	0
ZH38T0046573	Intron	ENSG00000146966.13	DENND2A	protein_coding	0.956364	2367	27	81	0
ZH38T0003894	Intron	ENSG00000135837.16	CEP350	protein_coding	0.956364	263	0	12	0
ZH38T0052576	Intron	ENSG00000071859.15	FAM50A	protein_coding	0.956322	416	6	13	0
ZH38T0028001	Proximal	ENSG00000115073.7	ACTR1B	protein_coding	0.956308	18298	804	32	0
ZH38T0006857	Intron	ENSG00000107960.11	STN1	protein_coding	0.956292	2538	108	8	0
ZH38T0012917	Intron	ENSG00000158023.10	WDR66	protein_coding	0.956245	2404	44	66	0
ZH38T0039369	Intron	ENSG00000131711.15	MAP1B	protein_coding	0.956236	4654	34	179	0
ZH38T0002919	Intron	ENSG00000143375.15	CGN	protein_coding	0.956229	284	4	9	0
ZH38T0025086	Proximal	ENSG00000167601.12	AXL	protein_coding	0.956225	14024	404	238	0
ZH38T0030928	Intron	ENSG00000101452.15	DHX35	protein_coding	0.956221	3735	66	105	0
ZH38T0012194	Proximal	ENSG00000058272.19	PPP1R12A	protein_coding	0.956163	19238	284	598	0
ZH38T0021833	Exon	ENSG00000214174.8	AMZ2P1	transcribed_unprocessed_pseudogene	0.956157	2050	10	84	0
ZH38T0003418	Proximal	ENSG00000213088.12	ACKR1	protein_coding	0.95612	3726	0	171	0
ZH38T0005221	Intron	ENSG00000242147.2	LINC02657	lncRNA	0.956117	1438	3	63	0
ZH38T0004603	Proximal	ENSG00000067533.6	RRP15	protein_coding	0.956027	1261	0	58	0
ZH38T0042364	Intron	ENSG00000270800.3, ENSG00000272325.2	RPS10-NUDT3 , NUDT3	protein_coding, protein_coding	0.956023	4500	102	105	0
ZH38T0000517	Intron	ENSG00000117122.13	MFAP2	protein_coding	0.956017	3130	9	135	0
ZH38T0029757	Intron	ENSG00000175084.11	DES	protein_coding	0.955977	4886	4	221	0
ZH38T0024759	Proximal	ENSG00000161277.10	THAP8	protein_coding	0.955973	14461	51	615	0
ZH38T0001313	Intron	ENSG00000065978.19	YBX1	protein_coding	0.955954	586	0	27	0
ZH38T0007387	Intron	ENSG00000177685.17	CRACR2B	protein_coding	0.955882	130	1	5	0
ZH38T0026701	Proximal	ENSG00000119772.16	DNMT3A	protein_coding	0.955848	8508	381	12	0
ZH38T0012472	Proximal	ENSG00000017427.16	IGF1	protein_coding	0.955824	9174	372	52	0
ZH38T0048896	Proximal	ENSG00000080503.24	SMARCA2	protein_coding	0.955792	11610	219	318	0
ZH38T0007582	Intron	ENSG00000129965.15	INS-IGF2	protein_coding	0.95579	3351	74	81	0
ZH38T0018389	Proximal	ENSG00000168447.11	SCNN1B	protein_coding	0.955787	3848	54	124	0
ZH38T0011356	Proximal	ENSG00000066117.14	SMARCD1	protein_coding	0.955782	41112	994	908	0
ZH38T0026973	Intron	ENSG00000115825.10	PRKD3	protein_coding	0.955752	1080	0	50	0
ZH38T0009348	Proximal	ENSG00000048649.13	RSF1	protein_coding	0.955742	63403	1478	1458	0
ZH38T0028727	Intron	ENSG00000115183.15	TANC1	protein_coding	0.955668	1703	12	67	0
ZH38T0049040	Proximal	ENSG00000164975.15	SNAPC3	protein_coding	0.955658	6638	132	176	0
ZH38T0025787	Intron	ENSG00000142539.9, ENSG00000269404.7	AC020909.2 , SPIB	protein_coding, protein_coding	0.955645	5688	96	168	0
ZH38T0023908	Intron	ENSG00000105397.13	TYK2	protein_coding	0.955609	6006	15	264	0
ZH38T0022804	Intron	ENSG00000134504.13, ENSG00000275805.1	KCTD1 , AC090206.1	protein_coding, lncRNA	0.955561	12665	447	138	4
ZH38T0005251	Intron	ENSG00000065675.14	PRKCQ	protein_coding	0.955556	4386	87	117	0
ZH38T0037631	Intron	ENSG00000164023.14	SGMS2	protein_coding	0.955556	1075	0	50	0
ZH38T0002596	Intron	ENSG00000275131.3	AC241952.1	transcribed_unprocessed_pseudogene	0.955546	6642	262	46	1
ZH38T0047178	Intron	ENSG00000147443.13	DOK2	protein_coding	0.955532	1805	40	44	0
ZH38T0025303	Proximal	ENSG00000130203.10	APOE	protein_coding	0.955529	1590	4	70	0
ZH38T0044324	Intron	ENSG00000198517.10	MAFK	protein_coding	0.955516	1611	4	71	0
ZH38T0018079	Proximal	ENSG00000182831.12	C16orf72	protein_coding	0.955495	5990	70	209	0
ZH38T0006931	Proximal	ENSG00000148700.14	ADD3	protein_coding	0.955489	111282	3964	1210	10
ZH38T0031304	Proximal	ENSG00000124164.15	VAPB	protein_coding	0.955423	2572	90	28	2
ZH38T0044430	Proximal	ENSG00000106346.11	USP42	protein_coding	0.955409	13777	633	9	1
ZH38T0050115	Intron	ENSG00000070061.15	ELP1	protein_coding	0.955409	20012	276	658	0
ZH38T0030397	Intron	ENSG00000182621.18	PLCB1	protein_coding	0.955406	9384	84	354	0
ZH38T0032453	Proximal	ENSG00000100109.17	TFIP11	protein_coding	0.955406	2271	9	97	0
ZH38T0010818	Proximal	ENSG00000171681.12	ATF7IP	protein_coding	0.955361	12777	18	579	0
ZH38T0031221	Intron	ENSG00000020256.20	ZFP64	protein_coding	0.955357	1070	40	10	0
ZH38T0003321	Intron	ENSG00000163468.15	CCT3	protein_coding	0.955285	1880	24	64	0
ZH38T0012932	Proximal	ENSG00000139719.10, ENSG00000256861.1	VPS33A , AC048338.1	protein_coding, protein_coding	0.955243	2988	36	104	0
ZH38T0005060	Intron	ENSG00000185420.19	SMYD3	protein_coding	0.955243	1494	26	44	0
ZH38T0040693	Intron	ENSG00000155506.17	LARP1	protein_coding	0.955236	3521	6	159	0
ZH38T0049177	Proximal	ENSG00000107201.10, ENSG00000197579.8	DDX58 , TOPORS	protein_coding, protein_coding	0.955207	27381	150	1134	0
ZH38T0016796	Proximal	ENSG00000129003.18	VPS13C	protein_coding	0.955163	2812	120	12	0
ZH38T0037082	Intron	ENSG00000109205.16	ODAM	protein_coding	0.955157	213	3	7	0
ZH38T0015058	Intron	ENSG00000054654.16	SYNE2	protein_coding	0.955149	5324	78	172	0
ZH38T0050490	Proximal	ENSG00000148337.21	CIZ1	protein_coding	0.955141	38304	532	1267	0
ZH38T0043332	Proximal	ENSG00000080546.13	SESN1	protein_coding	0.95503	11638	252	296	0
ZH38T0017255	Proximal	ENSG00000185787.14	MORF4L1	protein_coding	0.95501	16345	210	560	0
ZH38T0025171	Proximal	ENSG00000259436.1	AC010247.2	lncRNA	0.954955	318	0	15	0
ZH38T0042389	Intron	ENSG00000064999.15	ANKS1A	protein_coding	0.9549	3430	16	146	0
ZH38T0037445	Intron	ENSG00000138640.15	FAM13A	protein_coding	0.954887	1016	12	36	0
ZH38T0051876	Intron	ENSG00000147202.18	DIAPH2	protein_coding	0.954876	15765	455	290	0
ZH38T0021617	Intron	ENSG00000005379.17	TSPOAP1	protein_coding	0.954819	634	2	28	0
ZH38T0000002	Intergenic	ENSG00000279457.4	WASH9P	unprocessed_pseudogene	0.954817	3191	150	1	0
ZH38T0026959	Intron	ENSG00000115808.12	STRN	protein_coding	0.954804	7732	166	200	0
ZH38T0002060	Proximal	ENSG00000171492.14	LRRC8D	protein_coding	0.954799	6506	300	8	0
ZH38T0047949	Intron	ENSG00000076554.15, ENSG00000276418.5	TPD52 , AC036214.3	protein_coding, protein_coding	0.954784	7264	104	240	0
ZH38T0003268	Intron	ENSG00000116584.18	ARHGEF2	protein_coding	0.95478	739	17	18	0
ZH38T0042576	Intron	ENSG00000096088.16	PGC	protein_coding	0.95478	8150	60	326	0
ZH38T0022992	Proximal	ENSG00000184828.10	ZBTB7C	protein_coding	0.954753	2300	107	2	0
ZH38T0047620	Proximal	ENSG00000253729.7	PRKDC	protein_coding	0.954747	6456	0	306	0
ZH38T0001575	Proximal	ENSG00000162377.6	COA7	protein_coding	0.954745	1519	11	61	0
ZH38T0002998	Proximal	ENSG00000163207.7	IVL	protein_coding	0.954741	443	0	21	0
ZH38T0006368	Proximal	ENSG00000148671.13	ADIRF	protein_coding	0.954678	120804	730	5003	2
ZH38T0021801	Intergenic	ENSG00000239823.2, ENSG00000261371.6	RF00019 , PECAM1	misc_RNA, protein_coding	0.954578	2690	68	60	0
ZH38T0006531	Proximal	ENSG00000138193.15	PLCE1	protein_coding	0.954572	6430	62	244	0
ZH38T0030191	Proximal	ENSG00000176946.12	THAP4	protein_coding	0.954568	5799	3	273	0
ZH38T0000805	Intron	ENSG00000130695.15	CEP85	protein_coding	0.954545	1386	27	39	0
ZH38T0043450	Intron	ENSG00000287097.1	AL590550.1	lncRNA	0.954545	315	10	5	0
ZH38T0011519	Proximal	ENSG00000167779.9	IGFBP6	protein_coding	0.954509	14100	16	656	0
ZH38T0041347	Intron	ENSG00000145982.12	FARS2	protein_coding	0.954421	2094	62	38	0
ZH38T0017228	Proximal	ENSG00000140403.12	DNAJA4	protein_coding	0.954415	13944	125	541	0
ZH38T0040131	Intron	ENSG00000152700.14	SAR1B	protein_coding	0.954407	1570	20	55	0
ZH38T0047293	Proximal	ENSG00000221914.11	PPP2R2A	protein_coding	0.95437	52540	2444	68	0
ZH38T0023150	Intron	ENSG00000074657.13	ZNF532	protein_coding	0.954365	2405	45	70	0
ZH38T0000601	Intron	ENSG00000117245.12	KIF17	protein_coding	0.954315	564	6	21	0
ZH38T0023518	Intron	ENSG00000161082.13	CELF5	protein_coding	0.954298	1754	28	56	0
ZH38T0024741	Intron	ENSG00000004777.18	ARHGAP33	protein_coding	0.954286	1002	0	48	0
ZH38T0046124	Proximal	ENSG00000006652.14	IFRD1	protein_coding	0.954282	4947	96	141	0
ZH38T0036380	Proximal	ENSG00000163945.16	UVSSA	protein_coding	0.954251	57945	2766	9	3
ZH38T0019961	Intron	ENSG00000132522.16, ENSG00000261915.6	GPS2 , AC026954.2	protein_coding, protein_coding	0.954225	6504	0	312	0
ZH38T0012779	Proximal	ENSG00000088992.18	TESC	protein_coding	0.954225	2168	96	8	0
ZH38T0050541	Intron	ENSG00000136802.11	LRRC8A	protein_coding	0.954207	5001	0	240	0
ZH38T0039176	Intron	ENSG00000152932.8	RAB3C	protein_coding	0.954198	1000	8	40	0
ZH38T0017403	Intron	ENSG00000170776.21	AKAP13	protein_coding	0.954187	24660	40	1144	0
ZH38T0008555	Proximal	ENSG00000187049.9	TMEM216	protein_coding	0.954156	67122	1824	1401	0
ZH38T0019828	Proximal	ENSG00000091640.8	SPAG7	protein_coding	0.954128	3328	72	88	0
ZH38T0004539	Intron	ENSG00000226251.6	LINC02608	lncRNA	0.954111	1497	60	12	0
ZH38T0037566	Proximal	ENSG00000138821.13	SLC39A8	protein_coding	0.954046	40774	267	1697	0
ZH38T0029845	Intergenic	ENSG00000168955.3	TM4SF20	protein_coding	0.954023	249	5	7	0
ZH38T0000319	Proximal	ENSG00000241563.3	CORT	protein_coding	0.95402	4378	1	210	0
ZH38T0005718	Proximal	ENSG00000108100.18	CCNY	protein_coding	0.953978	20397	405	579	0
ZH38T0034775	Proximal	ENSG00000114439.19	BBX	protein_coding	0.953953	2341	62	51	0
ZH38T0019117	Proximal	ENSG00000102898.12	NUTF2	protein_coding	0.953952	4164	6	195	0
ZH38T0043917	Intron	ENSG00000118492.17	ADGB	protein_coding	0.953938	642	3	28	0
ZH38T0017287	Intron	ENSG00000172379.21	ARNT2	protein_coding	0.953925	2236	72	36	0
ZH38T0048603	Intron	ENSG00000066827.16	ZFAT	protein_coding	0.953917	1242	54	6	0
ZH38T0010496	Proximal	ENSG00000089693.10	MLF2	protein_coding	0.953916	356199	5778	11430	0
ZH38T0040718	Intron	ENSG00000113249.12	HAVCR1	protein_coding	0.953895	2400	16	100	0
ZH38T0047693	Proximal	ENSG00000254087.8	LYN	protein_coding	0.953857	2770	130	4	0
ZH38T0040198	Proximal	ENSG00000146013.11	GFRA3	protein_coding	0.953846	4092	44	154	0
ZH38T0049711	Intron	ENSG00000172159.16	FRMD3	protein_coding	0.953846	3224	4	152	0
ZH38T0004629	Proximal	ENSG00000067704.10	IARS2	protein_coding	0.953828	2417	19	98	0
ZH38T0037952	Proximal	ENSG00000164134.13	NAA15	protein_coding	0.953813	1776	60	26	0
ZH38T0031601	Proximal	ENSG00000154721.15	JAM2	protein_coding	0.953807	24840	480	723	0
ZH38T0038445	Intron	ENSG00000168556.7	ING2	protein_coding	0.953754	4599	0	223	0
ZH38T0014825	Intron	ENSG00000214900.10	LINC01588	lncRNA	0.953748	2392	12	104	0
ZH38T0000392	Intron	ENSG00000162496.9	DHRS3	protein_coding	0.953728	742	22	14	0
ZH38T0034849	Intron	ENSG00000091986.15	CCDC80	protein_coding	0.953704	412	4	16	0
ZH38T0016307	Proximal	ENSG00000137843.12, ENSG00000259288.7	PAK6 , BUB1B-PAK6	protein_coding, protein_coding	0.953675	5476	91	175	0
ZH38T0000782	Proximal	ENSG00000117632.23	STMN1	protein_coding	0.953642	15552	102	654	0
ZH38T0003842	Intron	ENSG00000120341.18, ENSG00000254154.8	SEC16B , CRYZL2P-SEC16B	protein_coding, lncRNA	0.95362	2529	36	87	0
ZH38T0012354	Intron	ENSG00000057704.13	TMCC3	protein_coding	0.953559	4394	0	214	0
ZH38T0036607	Proximal	ENSG00000007062.11	PROM1	protein_coding	0.953555	19956	801	171	0
ZH38T0019439	Intron	ENSG00000103194.15	USP10	protein_coding	0.95354	4310	114	96	0
ZH38T0012524	Intergenic	ENSG00000136052.9	SLC41A2	protein_coding	0.953532	1026	13	37	0
ZH38T0015555	Proximal	ENSG00000066455.13	GOLGA5	protein_coding	0.953488	4428	4	212	0
ZH38T0036430	Intron	ENSG00000197386.12	HTT	protein_coding	0.953488	164	2	6	0
ZH38T0008799	Proximal	ENSG00000168067.12	MAP4K2	protein_coding	0.953476	11026	84	454	0
ZH38T0048635	Proximal	ENSG00000169398.19	PTK2	protein_coding	0.953384	2127	39	65	0
ZH38T0035214	Proximal	ENSG00000172752.14	COL6A5	protein_coding	0.953353	327	3	13	0
ZH38T0029670	Proximal	ENSG00000135926.15	TMBIM1	protein_coding	0.95334	1798	2	86	0
ZH38T0032402	Proximal	ENSG00000099991.18	CABIN1	protein_coding	0.95331	5084	247	2	0
ZH38T0050808	Proximal	ENSG00000159069.14	FBXW5	protein_coding	0.953306	27970	1312	58	0
ZH38T0050457	Intron	ENSG00000136877.14	FPGS	protein_coding	0.953299	4695	125	105	0
ZH38T0035337	Proximal	ENSG00000158163.15	DZIP1L	protein_coding	0.953186	1466	40	32	0
[truncated: 15,449 more rows]

## Sheet: Table S3D
Supplemental Table S3D. Biosample enrichment of verified unannotated TSSs
Experiment accession	Biosample	% Unannotated TSS	% GENCODE TSS	log2 ratio
ENCSR866SRG	testis_male_adult_54_years	1.48998	0.986744	0.594546
ENCSR841EQJ	testis_male_adult_37_years	1.48801	1.00892	0.560576
ENCSR054RIR	SK-MEL-5	1.10961	0.81389	0.447147
ENCSR506WDZ	SK-MEL-5_nuclear_fraction	1.06984	0.808886	0.403387
ENCSR655HUL	prostate_gland_male_adult_37_years	1.35886	1.06464	0.352028
ENCSR612EAO	neural_cell_originated_from_H1	0.965101	0.806271	0.259416
ENCSR887SSW	spleen_female_adult_51_year	1.11788	0.971278	0.202809
ENCSR627SPU	spleen_male_adult_54_years	1.09662	0.955357	0.198947
ENCSR329YVA	spleen_male_adult_37_years	1.06315	0.948079	0.165262
ENCSR000AGL	diencephalon_female_embryo_20_weeks_and_male_embryo_22_weeks	1.04228	0.929998	0.164441
ENCSR855LXJ	OCI-LY7	0.744203	0.665373	0.161534
ENCSR000AER	K562	0.772553	0.702559	0.137016
ENCSR000AGK	cerebellum_female_embryo_19_weeks_and_female_embryo_37_weeks	1.13009	1.03701	0.124006
ENCSR199XGY	Peyer's_patch_female_adult_53_years	0.969039	0.891788	0.119854
ENCSR000AGR	occipital_lobe_female_embryo_20_weeks_and_male_embryo_22_weeks	1.01983	0.939209	0.118816
ENCSR686VRS	stomach_female_adult_53_years	1.04976	0.967753	0.117348
ENCSR239ZQA	NCI-H460_nuclear_fraction	0.899737	0.83163	0.113561
ENCSR000AEI	GM12878	0.79736	0.742815	0.102228
ENCSR649WDK	transverse_colon_male_adult_54_years	0.974945	0.909414	0.100383
ENCSR236PTD	spleen_female_adult_53_years	0.988333	0.923061	0.0985714
ENCSR852KOV	SK-N-DZ_cytosolic_fraction	0.79421	0.742361	0.0974007
ENCSR848OYH	tibial_nerve_female_adult_51_year	1.03283	0.966957	0.0950765
ENCSR855GRG	transverse_colon_female_adult_53_years	1.04346	0.97867	0.0924802
ENCSR176WZV	omental_fat_pad_male_adult_37_years	0.997389	0.936707	0.0905587
ENCSR000AGS	parietal_lobe_female_embryo_24_weeks_and_male_embryo_22_weeks	1.00802	0.949785	0.0858528
ENCSR613JNT	cardiac_muscle_cell_originated_from_RUES2	0.926119	0.873138	0.0849882
ENCSR000AGX	temporal_lobe_female_embryo_20_weeks_and_female_embryo_24_weeks	1.09071	1.0295	0.0833207
ENCSR785OGK	subcutaneous_adipose_tissue_female_adult_51_year	0.907219	0.869499	0.0612662
ENCSR000AGM	frontal_cortex_female_embryo_20_weeks_and_male_embryo_22_weeks	1.03558	0.994022	0.0590951
ENCSR724SZY	heart_male_adult_34_years	0.956045	0.924653	0.0481663
ENCSR792XFE	stomach_male_adult_37_years	0.999752	0.967184	0.0477798
ENCSR713KWE	Peyer's_patch_male_adult_37_years	0.846186	0.820145	0.0450967
ENCSR679TCM	esophagus_muscularis_mucosa_female_adult_51_year	0.97967	0.951946	0.0414172
ENCSR930XIH	adrenal_gland_female_adult_53_years	0.975733	0.950922	0.0371588
ENCSR419MZM	subcutaneous_adipose_tissue_female_adult_53_years	0.922969	0.905093	0.0282161
ENCSR954YVZ	Peyer's_patch_male_adult_54_years	0.84658	0.833222	0.0229447
ENCSR688YRV	transverse_colon_male_adult_37_years	0.779641	0.767834	0.0220162
ENCSR970OWZ	adrenal_gland_male_adult_54_years	0.94502	0.931249	0.0211778
ENCSR598TAK	breast_epithelium_female_adult_51_year	1.01393	1.0005	0.0192275
ENCSR883KJV	esophagus_muscularis_mucosa_male_adult_37_years	0.919425	0.907822	0.0183222
ENCSR000AGV	spinal_cord_female_embryo_24_weeks_and_male_embryo_22_weeks	1.01865	1.00699	0.0166184
ENCSR000AGQ	lung_female_embryo_20_weeks_and_female_embryo_24_weeks	1.01314	1.00164	0.0164676
ENCSR601URL	ovary_female_adult_51_year	1.01944	1.00801	0.0162677
ENCSR035MAJ	sigmoid_colon_female_adult_51_year	0.918244	0.908391	0.0155641
ENCSR611YXR	omental_fat_pad_female_adult_51_year	0.899344	0.889855	0.0153026
ENCSR743LXD	adrenal_gland_female_adult_51_year	0.919819	0.912599	0.0113695
ENCSR616JRI	suprapubic_skin_male_adult_54_years	0.919032	0.914646	0.0069015
ENCSR669JBL	esophagus_muscularis_mucosa_female_adult_53_years	0.920213	0.918853	0.0021331
ENCSR477JQM	thyroid_gland_female_adult_51_year	0.917456	0.916806	0.00102283
ENCSR501EGS	suprapubic_skin_male_adult_37_years	0.884381	0.883828	0.000902689
ENCSR833XGD	sigmoid_colon_male_adult_54_years	0.952501	0.957177	-0.00706469
ENCSR100NLN	kidney_epithelial_cell_male_embryo_22_weeks_and_male_newborn	0.841461	0.848688	-0.0123381
ENCSR700YLA	thyroid_gland_female_adult_53_years	0.945413	0.95422	-0.0133767
ENCSR000AHA	umbilical_cord_male_embryo_20_weeks_and_male_embryo_31_week	0.854849	0.863244	-0.0140996
ENCSR000AGO	metanephros_female_embryo_20_weeks_and_female_embryo_24_weeks	0.959982	0.972301	-0.0183956
ENCSR030CKH	lower_leg_skin_female_adult_51_year	0.841461	0.85301	-0.0196654
ENCSR454ZQB	esophagus_muscularis_mucosa_male_adult_54_years	0.886743	0.901568	-0.0239195
ENCSR706VZW	tibial_nerve_female_adult_53_years	0.857605	0.872683	-0.0251441
ENCSR000AGT	skeletal_muscle_tissue_female_embryo_19_weeks_and_male_embryo_22_weeks	0.694589	0.707108	-0.0257694
ENCSR671RMD	prostate_gland_male_adult_54_years	0.928875	0.945805	-0.0260572
ENCSR602PHV	neural_progenitor_cell_originated_from_H9	0.743809	0.759532	-0.0301787
ENCSR028GEI	gastroesophageal_sphincter_female_adult_53_years	0.906431	0.92579	-0.0304875
ENCSR069LRO	thyroid_gland_male_adult_54_years	0.886743	0.906913	-0.032447
ENCSR790PBX	upper_lobe_of_left_lung_female_adult_53_years	0.961164	0.985834	-0.0365626
ENCSR779OWH	gastroesophageal_sphincter_female_adult_51_year	0.896194	0.919649	-0.0372734
ENCSR469ZUS	glomerular_endothelial_cell_female_embryo_22_weeks_and_male_embryo_22_weeks	0.78791	0.811388	-0.0423616
ENCSR000AGU	skin_of_body_female_embryo_24_weeks_and_male_embryo_22_weeks	0.696952	0.718252	-0.0434311
ENCSR321NPB	sigmoid_colon_female_adult_53_years	0.916669	0.944781	-0.0435795
ENCSR738HKC	upper_lobe_of_left_lung_male_adult_37_years	0.918638	0.947738	-0.0449921
ENCSR410OSB	GM23338_originated_from_GM23248	0.765466	0.791033	-0.0473991
ENCSR554TZR	right_atrium_auricular_region_female_adult_51_year	0.828467	0.856649	-0.0482592
ENCSR161GPD	esophagus_squamous_epithelium_male_adult_37_years	0.885562	0.916124	-0.0489494
ENCSR337VPD	smooth_muscle_cell_originated_from_H9	0.806023	0.835383	-0.0516171
ENCSR000AGY	thyroid_gland_female_embryo_37_weeks_and_female_embryo_40_weeks	0.897769	0.943189	-0.0712036
ENCSR632GYF	thoracic_aorta_male_adult_37_years	0.801692	0.84414	-0.0744341
ENCSR786DTS	SK-N-DZ_treated_with_dimethyl_sulfoxide_for_72_hours	0.959589	1.01097	-0.0752465
ENCSR497BYB	stomach_female_adult_51_year	0.878868	0.928633	-0.0794619
ENCSR983ICQ	ovary_female_adult_53_years	0.813504	0.859947	-0.0800969
ENCSR472PZH	omental_fat_pad_female_adult_53_years	0.812717	0.859947	-0.0814942
ENCSR219EAT	vagina_female_adult_53_years	0.858393	0.911803	-0.0870836
ENCSR000AGN	heart_female_embryo_19_weeks_and_female_embryo_28_weeks	0.809567	0.862335	-0.0910978
ENCSR502DKA	uterus_female_adult_53_years	0.836342	0.891447	-0.0920552
ENCSR007RIV	SK-MEL-5_cytosolic_fraction	0.632769	0.674584	-0.092318
ENCSR918MVG	body_of_pancreas_female_adult_51_year	0.86233	0.920104	-0.0935565
ENCSR000AGJ	urinary_bladder_female_embryo_20_weeks_and_female_embryo_24_weeks	0.869418	0.930566	-0.098059
ENCSR480WCN	suprapubic_skin_female_adult_53_years	0.743415	0.798424	-0.102987
ENCSR663WYF	mammary_microvascular_endothelial_cell_female_adult_26_years	0.711127	0.765901	-0.107049
ENCSR285LDX	liver_male_adult_32_years	0.783185	0.846869	-0.112785
ENCSR877SCS	right_atrium_auricular_region_female_adult_53_years	0.807204	0.879961	-0.124506
ENCSR698NAQ	sigmoid_colon_male_adult_37_years	0.83083	0.917943	-0.143853
ENCSR464UVO	heart_left_ventricle_female_adult_53_years	0.728453	0.805589	-0.145208
ENCSR949PHV	GM23248	0.661514	0.731785	-0.145648
ENCSR543DIO	right_lobe_of_liver_female_adult_53_years_1	0.685927	0.759987	-0.147921
ENCSR419VNG	pericardium_fibroblast_NONE_and_female_embryo_20_weeks	0.709158	0.793421	-0.161978
ENCSR290RXI	myometrial_cell_female_adult_34_years	0.679233	0.76681	-0.174964
ENCSR108KHH	SJSA1	0.614656	0.694826	-0.176871
ENCSR201ARN	esophagus_squamous_epithelium_female_adult_51_year	0.678052	0.769312	-0.182174
ENCSR024MNP	gastrocnemius_medialis_female_adult_51_year	0.65797	0.747023	-0.183131
ENCSR376IXU	epithelial_cell_of_alveolus_of_lung_NONE_and_female_embryo_21_week	0.706796	0.807636	-0.192411
ENCSR540YVD	SJCRH30	0.622925	0.712794	-0.194425
ENCSR000AGZ	tongue_female_embryo_20_weeks_and_female_embryo_24_weeks	0.79106	0.905662	-0.195185
ENCSR941SAZ	right_lobe_of_liver_female_adult_53_years_2	0.635526	0.72951	-0.198978
ENCSR000AGW	stomach_female_embryo_40_weeks_and_male_embryo_36_weeks	0.82453	0.946601	-0.199185
ENCSR479BMI	SK-N-DZ_nuclear_fraction	0.737509	0.847779	-0.201027
ENCSR102OEK	esophagus_squamous_epithelium_male_adult_54_years	0.704827	0.814459	-0.208572
ENCSR093UPQ	NCI-H460	0.616625	0.71575	-0.215062
ENCSR000AGP	liver_female_embryo_20_weeks_and_male_embryo_22_weeks	0.672539	0.783072	-0.219528
ENCSR022PAU	HT1080_cytosolic_fraction	0.598512	0.699716	-0.225388
ENCSR226BLJ	heart_left_ventricle_female_adult_51_year	0.640645	0.754415	-0.235834
ENCSR710LGT	gastrocnemius_medialis_female_adult_53_years	0.632376	0.744862	-0.236192
ENCSR930RDW	esophagus_squamous_epithelium_female_adult_53_years	0.719002	0.858241	-0.255386
ENCSR824YLV	NCI-H460_cytosolic_fraction	0.587487	0.704492	-0.262026
ENCSR582BUX	airway_epithelial_cell	0.628832	0.761693	-0.276535
ENCSR366BLN	body_of_pancreas_female_adult_53_years	0.698527	0.864268	-0.307163
ENCSR458JVO	gastrocnemius_medialis_male_adult_37_years	0.49771	0.671172	-0.431377

## Sheet: Table S3E
Supplemental Table S3E. Candidate RAMPAGE TSSs of annotated transcripts
rPeak ID	Genomic context	Overlapping genes (GENCODE ID)	Overlapping genes (Common name)	Gene class	# RAMPAGE reads	Single exon transcript?	First exon > 500 bp?
ZH38T0000006	Proximal	ENSG00000198744.5, ENSG00000240409.1, ENSG00000248527.1	MTCO3P12 , MTATP8P1 , MTATP6P1	unprocessed_pseudogene, unprocessed_pseudogene, unprocessed_pseudogene	286704	Y	---
ZH38T0006254	Proximal	ENSG00000156113.23	KCNMA1	protein_coding	106704	---	Y
ZH38T0043463	TSS	ENSG00000189241.7	TSPYL1	protein_coding	89334	Y	---
ZH38T0009429	TSS	ENSG00000137504.13	CREBZF	protein_coding	70921	---	Y
ZH38T0030826	TSS	ENSG00000260032.2	NORAD	lncRNA	64952	---	Y
ZH38T0012112	TSS	ENSG00000253719.3	ATXN7L3B	protein_coding	60375	---	Y
ZH38T0041647	Exon	ENSG00000124766.6	SOX4	protein_coding	59695	---	Y
ZH38T0025629	TSS	ENSG00000130528.12	HRC	protein_coding	58345	---	Y
ZH38T0025666	Proximal	ENSG00000200259.1	SNORD35A	snoRNA	55324	Y	---
ZH38T0047540	TSS	ENSG00000176907.4	TCIM	protein_coding	54534	Y	---
ZH38T0037436	TSS	ENSG00000177432.7	NAP1L5	protein_coding	52969	---	Y
ZH38T0029952	Proximal	ENSG00000284378.1	MIR1244-1	miRNA	52828	Y	---
ZH38T0010069	Proximal	ENSG00000200879.1	SNORD14E	snoRNA	52185	Y	---
ZH38T0000834	TSS	ENSG00000175793.12	SFN	protein_coding	50274	Y	---
ZH38T0005885	TSS	ENSG00000177613.8	CSTF2T	protein_coding	49250	Y	---
ZH38T0042614	TSS	ENSG00000124659.6	TBCC	protein_coding	46513	Y	---
ZH38T0006629	TSS	ENSG00000236552.2	RPL13AP5	processed_pseudogene	43905	Y	---
ZH38T0018522	Exon	ENSG00000103495.14, ENSG00000238045.9	MAZ , AC009133.1	protein_coding, lncRNA	40626	Y	---
ZH38T0004819	TSS	ENSG00000196890.4	HIST3H2BB	protein_coding	39015	Y	---
ZH38T0040175	TSS	ENSG00000177733.6	HNRNPA0	protein_coding	38495	Y	---
ZH38T0043459	TSS	ENSG00000187189.10	TSPYL4	protein_coding	37609	---	Y
ZH38T0051095	TSS	ENSG00000197582.5	GPX1P1	processed_pseudogene	37501	Y	---
ZH38T0051603	TSS	ENSG00000187601.4	MAGEH1	protein_coding	34853	Y	---
ZH38T0041738	TSS	ENSG00000278463.1	HIST1H2AB	protein_coding	34417	---	Y
ZH38T0051711	Proximal	ENSG00000147130.14	ZMYM3	protein_coding	34363	Y	---
ZH38T0001894	Proximal	ENSG00000226084.5	AC113935.1	processed_pseudogene	33496	Y	---
ZH38T0042143	Proximal	ENSG00000213722.9	DDAH2	protein_coding	33033	Y	---
ZH38T0008869	Exon	ENSG00000245532.9	NEAT1	lncRNA	32621	Y	---
ZH38T0032800	Proximal	ENSG00000189060.5	H1F0	protein_coding	32390	Y	---
ZH38T0032893	Proximal	ENSG00000209480.1	SNORD83B	snoRNA	31424	Y	---
ZH38T0042163	TSS	ENSG00000204388.7	HSPA1B	protein_coding	31328	Y	---
ZH38T0034417	TSS	ENSG00000163618.18	CADPS	protein_coding	31020	Y	---
ZH38T0015080	Proximal	ENSG00000126803.9	HSPA2	protein_coding	30792	Y	---
ZH38T0021621	TSS	ENSG00000005379.17	TSPOAP1	protein_coding	29756	Y	---
ZH38T0009985	TSS	ENSG00000188486.3	H2AFX	protein_coding	28372	---	Y
ZH38T0018523	Exon	ENSG00000103495.14, ENSG00000238045.9	MAZ , AC009133.1	protein_coding, lncRNA	26352	---	Y
ZH38T0051335	Proximal	ENSG00000215301.10	DDX3X	protein_coding	24768	---	Y
ZH38T0024090	TSS	ENSG00000171223.6	JUNB	protein_coding	23284	Y	---
ZH38T0026629	Exon	ENSG00000143878.9	RHOB	protein_coding	23083	---	Y
ZH38T0042675	Proximal	ENSG00000112715.21, ENSG00000272114.1	VEGFA , AL136131.3	protein_coding, lncRNA	22152	Y	---
ZH38T0031695	TSS	ENSG00000256073.3	URB1-AS1	lncRNA	21814	Y	---
ZH38T0001252	TSS	ENSG00000259943.1	AL050341.2	lncRNA	21534	Y	---
ZH38T0019968	Proximal	ENSG00000213859.6	KCTD11	protein_coding	20794	Y	---
ZH38T0041241	TSS	ENSG00000164379.7	FOXQ1	protein_coding	20368	---	Y
ZH38T0024061	Proximal	ENSG00000178464.6	RPL10P16	processed_pseudogene	19694	Y	---
ZH38T0008875	Exon	ENSG00000245532.9	NEAT1	lncRNA	19162	Y	---
ZH38T0010001	TSS	ENSG00000173456.4	RNF26	protein_coding	18930	---	Y
ZH38T0044065	TSS	ENSG00000049618.23	ARID1B	protein_coding	18819	Y	---
ZH38T0008884	Exon	ENSG00000245532.9	NEAT1	lncRNA	18762	Y	---
ZH38T0007919	TSS	ENSG00000244398.1	AC116533.1	processed_pseudogene	18297	Y	---
ZH38T0011326	Proximal	ENSG00000258232.2	AC125611.3	lncRNA	17674	Y	---
ZH38T0007559	Proximal	ENSG00000275266.1	RF01972	misc_RNA	17266	Y	---
ZH38T0005217	TSS	ENSG00000178372.7	CALML5	protein_coding	16930	Y	---
ZH38T0012282	TSS	ENSG00000257594.4, ENSG00000270344.3	GALNT4 , POC1B-AS1	protein_coding, lncRNA	16828	---	Y
ZH38T0004605	TSS	ENSG00000092969.12	TGFB2	protein_coding	16400	---	Y
ZH38T0000003	TSS	ENSG00000225630.1	MTND2P28	unprocessed_pseudogene	16329	Y	---
ZH38T0024767	Proximal	ENSG00000126247.10	CAPNS1	protein_coding	16191	Y	---
ZH38T0051950	Exon	ENSG00000185222.10	TCEAL9	protein_coding	16059	Y	---
ZH38T0035714	TSS	ENSG00000238741.1	SCARNA7	scaRNA	15851	Y	---
ZH38T0030486	TSS	ENSG00000125844.15	RRBP1	protein_coding	15790	Y	---
ZH38T0026916	Proximal	ENSG00000021574.12	SPAST	protein_coding	15648	Y	---
ZH38T0047059	TSS	ENSG00000164743.5	C8orf48	protein_coding	15334	Y	---
ZH38T0040286	Exon	ENSG00000185129.6	PURA	protein_coding	14942	Y	---
ZH38T0038111	TSS	ENSG00000181541.5	MAB21L2	protein_coding	14896	Y	---
ZH38T0049696	TSS	ENSG00000196781.15	TLE1	protein_coding	14822	Y	---
ZH38T0013044	Exon	ENSG00000150991.15	UBC	protein_coding	14670	Y	---
ZH38T0029991	TSS	ENSG00000251791.1	SCARNA6	scaRNA	14538	---	Y
ZH38T0041756	Proximal	ENSG00000158373.8	HIST1H2BD	protein_coding	14376	Y	---
ZH38T0036586	Proximal	ENSG00000137449.15, ENSG00000247624.6	CPEB2 , CPEB2-DT	protein_coding, lncRNA	14231	Y	---
ZH38T0042000	TSS	ENSG00000146112.12	PPP1R18	protein_coding	14012	---	Y
ZH38T0026628	TSS	ENSG00000143878.9	RHOB	protein_coding	13947	---	Y
ZH38T0020353	Proximal	ENSG00000189343.7	RPS2P46	processed_pseudogene	13588	Y	---
ZH38T0015643	TSS	ENSG00000252481.1	SCARNA13	scaRNA	13388	Y	---
ZH38T0030824	Exon	ENSG00000260032.2	NORAD	lncRNA	13333	Y	---
ZH38T0050780	TSS	ENSG00000276161.1, ENSG00000280496.1	SNORA17B , SNORA17B	snoRNA, snoRNA	13282	---	Y
ZH38T0002747	TSS	ENSG00000274210.1	RF00003	snRNA	12760	Y	---
ZH38T0038848	TSS	ENSG00000240376.1	AC010343.1	processed_pseudogene	12642	Y	---
ZH38T0027619	Proximal	ENSG00000257800.1	FNBP1P1	processed_pseudogene	12635	Y	---
ZH38T0041747	TSS	ENSG00000187475.5	HIST1H1T	protein_coding	12281	Y	---
ZH38T0015709	Proximal	ENSG00000214548.18, ENSG00000274884.1	MEG3 , AL117190.3	lncRNA, misc_RNA	12272	Y	---
ZH38T0032806	Proximal	ENSG00000279738.1	AL022311.1	lncRNA	12093	Y	---
ZH38T0045316	TSS	ENSG00000176410.7	DNAJC30	protein_coding	11979	Y	---
ZH38T0025447	Proximal	ENSG00000160007.18	ARHGAP35	protein_coding	11974	---	Y
ZH38T0040528	Exon	ENSG00000169252.5	ADRB2	protein_coding	11909	Y	---
ZH38T0000596	Exon	ENSG00000117242.7, ENSG00000158828.8	PINK1-AS , PINK1	lncRNA, protein_coding	11864	---	Y
ZH38T0020261	Proximal	ENSG00000215030.5	RPL13P12	processed_pseudogene	11267	Y	---
ZH38T0037133	Proximal	ENSG00000132466.18, ENSG00000250220.1	ANKRD17 , AC053527.1	protein_coding, lncRNA	11220	Y	---
ZH38T0022800	TSS	ENSG00000188985.6	DHFRP1	processed_pseudogene	11179	Y	---
ZH38T0012762	Proximal	ENSG00000135111.16	TBX3	protein_coding	10454	---	Y
ZH38T0012563	TSS	ENSG00000151136.15	BTBD11	protein_coding	10234	Y	---
ZH38T0019355	Proximal	ENSG00000178573.7	MAF	protein_coding	10011	---	Y
ZH38T0041733	Proximal	ENSG00000278637.1	HIST1H4A	protein_coding	9968	---	Y
ZH38T0013042	Exon	ENSG00000150991.15	UBC	protein_coding	9780	Y	---
ZH38T0019264	TSS	ENSG00000260664.2	AC004158.1	lncRNA	9772	Y	---
ZH38T0008871	Exon	ENSG00000245532.9	NEAT1	lncRNA	9657	Y	---
ZH38T0028966	Proximal	ENSG00000172845.15	SP3	protein_coding	9592	Y	---
ZH38T0032206	TSS	ENSG00000184113.9	CLDN5	protein_coding	9568	Y	---
ZH38T0008874	Exon	ENSG00000245532.9	NEAT1	lncRNA	9501	Y	---
ZH38T0041731	TSS	ENSG00000124610.4	HIST1H1A	protein_coding	9343	---	Y
ZH38T0000910	TSS	ENSG00000270103.3, ENSG00000274978.1	AL360012.1 , RNU11	lncRNA, snRNA	9342	Y	---
ZH38T0026915	TSS	ENSG00000021574.12	SPAST	protein_coding	9320	---	Y
ZH38T0025411	TSS	ENSG00000169515.8	CCDC8	protein_coding	9301	---	Y
ZH38T0016658	Proximal	ENSG00000169856.8	ONECUT1	protein_coding	9288	Y	---
ZH38T0003706	TSS	ENSG00000213062.5	Z99572.1	lncRNA	9174	Y	---
ZH38T0015712	Proximal	ENSG00000214548.18	MEG3	lncRNA	9121	---	Y
ZH38T0041774	TSS	ENSG00000274750.2	HIST1H3E	protein_coding	8903	Y	---
ZH38T0008882	Exon	ENSG00000245532.9	NEAT1	lncRNA	8890	Y	---
ZH38T0001686	Exon	ENSG00000177606.6	JUN	protein_coding	8883	Y	---
ZH38T0036713	Proximal	ENSG00000169851.15	PCDH7	protein_coding	8752	Y	---
ZH38T0028134	TSS	ENSG00000135974.10, ENSG00000272994.1	C2orf49 , AC012360.3	protein_coding, lncRNA	8752	---	Y
ZH38T0001687	Exon	ENSG00000177606.6	JUN	protein_coding	8742	Y	---
ZH38T0039661	TSS	ENSG00000175745.14	NR2F1	protein_coding	8704	Y	---
ZH38T0040388	TSS	ENSG00000253873.6	PCDHGA11	protein_coding	8648	Y	---
ZH38T0029431	Proximal	ENSG00000204196.5	RPL12P16	processed_pseudogene	8634	Y	---
ZH38T0026632	Exon	ENSG00000143878.9	RHOB	protein_coding	8248	Y	---
ZH38T0007811	TSS	ENSG00000238622.1	SNORD97	snoRNA	8240	Y	---
ZH38T0051762	Exon	ENSG00000229807.12	XIST	lncRNA	8200	---	Y
ZH38T0002267	TSS	ENSG00000198890.8	PRMT6	protein_coding	8149	Y	---
ZH38T0019549	TSS	ENSG00000259877.2	AC009113.1	lncRNA	8143	Y	---
ZH38T0030336	Exon	ENSG00000125817.8	CENPB	protein_coding	8120	Y	---
ZH38T0044085	Proximal	ENSG00000130338.13	TULP4	protein_coding	7946	---	Y
ZH38T0042075	Proximal	ENSG00000204520.13	MICA	protein_coding	7935	Y	---
ZH38T0023385	TSS	ENSG00000207357.1	RNU6-2	snRNA	7818	Y	---
ZH38T0051761	Exon	ENSG00000229807.12	XIST	lncRNA	7818	---	Y
ZH38T0023054	TSS	ENSG00000134046.12	MBD2	protein_coding	7767	---	Y
ZH38T0018519	Proximal	ENSG00000275857.1	AC009133.4	lncRNA	7707	Y	---
ZH38T0014343	TSS	ENSG00000200785.1	SNORD8	snoRNA	7627	---	Y
ZH38T0040384	Proximal	ENSG00000261934.2	PCDHGA9	protein_coding	7552	Y	---
ZH38T0000004	Proximal	ENSG00000237973.1	MTCO1P12	unprocessed_pseudogene	7473	Y	---
ZH38T0041509	Proximal	ENSG00000212802.4	RPL15P3	processed_pseudogene	7282	Y	---
ZH38T0037267	Proximal	ENSG00000249565.2	SERBP1P5	processed_pseudogene	7267	---	Y
ZH38T0041875	TSS	ENSG00000189134.3	NKAPL	protein_coding	7266	---	Y
ZH38T0037979	TSS	ENSG00000196782.12	MAML3	protein_coding	7195	---	Y
ZH38T0015262	TSS	ENSG00000176903.4	PNMA1	protein_coding	7123	---	Y
ZH38T0000005	Proximal	ENSG00000240409.1, ENSG00000248527.1	MTATP8P1 , MTATP6P1	unprocessed_pseudogene, unprocessed_pseudogene	7068	Y	---
ZH38T0047424	Proximal	ENSG00000157168.20, ENSG00000286131.1	NRG1 , AC083977.1	protein_coding, protein_coding	7044	---	Y
ZH38T0001969	TSS	ENSG00000271576.1	AL359504.2	lncRNA	7003	Y	---
ZH38T0040389	TSS	ENSG00000253159.3	PCDHGA12	protein_coding	6928	Y	---
ZH38T0046391	TSS	ENSG00000286214.1	AUXG01000058.1	lncRNA	6904	---	Y
ZH38T0042623	TSS	ENSG00000221821.4	C6orf226	protein_coding	6853	Y	---
ZH38T0003147	TSS	ENSG00000143603.19	KCNN3	protein_coding	6840	---	Y
ZH38T0018623	Proximal	ENSG00000179918.18	SEPHS2	protein_coding	6838	Y	---
ZH38T0051373	Proximal	ENSG00000207870.1	MIR221	miRNA	6628	Y	---
ZH38T0000591	TSS	ENSG00000162545.6	CAMK2N1	protein_coding	6606	---	Y
ZH38T0001926	TSS	ENSG00000273338.1	AC103591.3	lncRNA	6531	Y	---
ZH38T0043462	Proximal	ENSG00000111817.17, ENSG00000189241.7	DSE , TSPYL1	protein_coding, protein_coding	6527	Y	---
ZH38T0008518	TSS	ENSG00000110446.11	SLC15A3	protein_coding	6523	---	Y
ZH38T0031209	TSS	ENSG00000124217.4	MOCS3	protein_coding	6467	Y	---
ZH38T0042630	TSS	ENSG00000181524.6	RPL24P4	processed_pseudogene	6439	---	Y
ZH38T0027496	Exon	ENSG00000244617.2	ASPRV1	protein_coding	6343	---	Y
ZH38T0036587	Proximal	ENSG00000137449.15	CPEB2	protein_coding	6279	Y	---
ZH38T0048703	TSS	ENSG00000287576.1	AC067930.8	lncRNA	6275	Y	---
ZH38T0031763	Proximal	ENSG00000159212.12	CLIC6	protein_coding	6262	Y	---
ZH38T0024095	Exon	ENSG00000171223.6	JUNB	protein_coding	6257	Y	---
ZH38T0011271	TSS	ENSG00000221491.2, ENSG00000281842.2	SNORA2C , MIR1291	snoRNA, miRNA	6232	Y	---
ZH38T0009293	TSS	ENSG00000207445.1	SNORD15B	snoRNA	6119	Y	---
ZH38T0031629	TSS	ENSG00000154736.6	ADAMTS5	protein_coding	6100	Y	---
ZH38T0029921	Proximal	ENSG00000206885.1	SNORA75	snoRNA	6098	Y	---
ZH38T0049083	TSS	ENSG00000155875.15, ENSG00000155876.5	SAXO1 , RRAGA	protein_coding, protein_coding	5955	---	Y
ZH38T0020945	Proximal	ENSG00000171401.15	KRT13	protein_coding	5949	Y	---
ZH38T0049374	TSS	ENSG00000196196.3	HRCT1	protein_coding	5936	Y	---
ZH38T0013122	TSS	ENSG00000208892.1	SNORA49	snoRNA	5883	---	Y
ZH38T0013806	TSS	ENSG00000150361.12	KLHL1	protein_coding	5854	Y	---
ZH38T0022545	Proximal	ENSG00000177426.20	TGIF1	protein_coding	5844	Y	---
ZH38T0013045	Exon	ENSG00000150991.15	UBC	protein_coding	5838	Y	---
ZH38T0007594	Proximal	ENSG00000236264.5	RPL26P30	transcribed_processed_pseudogene	5816	Y	---
ZH38T0047908	Proximal	ENSG00000270866.1, ENSG00000271167.1	AC067773.1 , LINC01109	lncRNA, lncRNA	5780	Y	---
ZH38T0034007	Proximal	ENSG00000076201.15, ENSG00000260236.1	PTPN23 , AC099778.1	protein_coding, lncRNA	5716	Y	---
ZH38T0027925	TSS	ENSG00000272913.1	AC009237.14	lncRNA	5695	Y	---
ZH38T0052299	Proximal	ENSG00000134590.13	RTL8C	protein_coding	5690	---	Y
ZH38T0016186	TSS	ENSG00000182405.6	PGBD4	protein_coding	5687	Y	---
ZH38T0009594	Exon	ENSG00000082175.14	PGR	protein_coding	5624	Y	---
ZH38T0002743	Proximal	ENSG00000280649.2	AC245100.8	TEC	5542	Y	---
ZH38T0006826	TSS	ENSG00000148842.18, ENSG00000286575.1	CNNM2 , AL356608.2	protein_coding, lncRNA	5499	---	Y
ZH38T0025164	Proximal	ENSG00000105732.13	ZNF574	protein_coding	5448	Y	---
ZH38T0030933	TSS	ENSG00000204103.4	MAFB	protein_coding	5420	Y	---
ZH38T0035787	Proximal	ENSG00000270141.3, ENSG00000277925.1	TERC , RF00024	lncRNA, misc_RNA	5352	Y	---
ZH38T0009549	Proximal	ENSG00000263465.4	SRSF8	protein_coding	5322	Y	---
ZH38T0029046	Proximal	ENSG00000196659.9	TTC30B	protein_coding	5298	---	Y
ZH38T0009590	Proximal	ENSG00000165895.19	ARHGAP42	protein_coding	5286	Y	---
ZH38T0008650	TSS	ENSG00000206597.1	SNORA57	snoRNA	5282	---	Y
ZH38T0030566	Proximal	ENSG00000178726.6	THBD	protein_coding	5122	Y	---
ZH38T0024369	Exon	ENSG00000130522.5	JUND	protein_coding	5101	Y	---
ZH38T0031321	Proximal	ENSG00000087460.25	GNAS	protein_coding	5071	Y	---
ZH38T0016422	TSS	ENSG00000205871.5	RPS3AP47	processed_pseudogene	4943	Y	---
ZH38T0042993	Proximal	ENSG00000235174.1	RPL39P3	processed_pseudogene	4919	Y	---
ZH38T0014535	Proximal	ENSG00000100441.10, ENSG00000139899.10	KHNYN , CBLN3	protein_coding, protein_coding	4842	Y	---
ZH38T0019595	Proximal	ENSG00000177946.6, ENSG00000223959.8	CENPBD1 , AFG3L1P	protein_coding, transcribed_unitary_pseudogene	4834	Y	---
ZH38T0000901	TSS	ENSG00000200087.1	SNORA73B	snoRNA	4823	Y	---
ZH38T0025170	Proximal	ENSG00000266226.1	MIR4323	miRNA	4797	Y	---
ZH38T0001535	Proximal	ENSG00000123080.12	CDKN2C	protein_coding	4772	---	Y
ZH38T0030220	Proximal	ENSG00000247315.3	ZCCHC3	protein_coding	4750	---	Y
ZH38T0039924	TSS	ENSG00000113083.14	LOX	protein_coding	4732	Y	---
ZH38T0027162	Proximal	ENSG00000230979.3	AC079250.1	processed_pseudogene	4730	Y	---
ZH38T0008032	TSS	ENSG00000183161.5	FANCF	protein_coding	4668	Y	---
ZH38T0018728	Proximal	ENSG00000140691.16, ENSG00000260267.1	ARMC5 , AC026471.1	protein_coding, lncRNA	4640	---	Y
ZH38T0007617	TSS	ENSG00000207008.1	SNORA54	snoRNA	4629	Y	---
ZH38T0001561	TSS	ENSG00000198841.3	KTI12	protein_coding	4628	Y	---
ZH38T0021211	Exon	ENSG00000186834.3	HEXIM1	protein_coding	4622	Y	---
ZH38T0043105	Proximal	ENSG00000135318.12	NT5E	protein_coding	4599	Y	---
ZH38T0017032	Proximal	ENSG00000259781.1	HMGB1P6	processed_pseudogene	4538	Y	---
ZH38T0051504	Proximal	ENSG00000207785.1, ENSG00000208015.1	MIR500A , MIR362	miRNA, miRNA	4533	---	Y
ZH38T0012103	TSS	ENSG00000072657.8	TRHDE	protein_coding	4528	Y	---
ZH38T0015252	TSS	ENSG00000170468.7	RIOX1	protein_coding	4500	Y	---
ZH38T0036715	TSS	ENSG00000169851.15	PCDH7	protein_coding	4500	Y	---
ZH38T0038003	TSS	ENSG00000170153.11	RNF150	protein_coding	4488	Y	---
ZH38T0026861	Proximal	ENSG00000171103.11	TRMT61B	protein_coding	4397	Y	---
ZH38T0010969	Proximal	ENSG00000111728.10	ST8SIA1	protein_coding	4395	Y	---
ZH38T0013815	TSS	ENSG00000276644.5	DACH1	protein_coding	4389	Y	---
ZH38T0043925	TSS	ENSG00000203727.4	SAMD5	protein_coding	4371	---	Y
ZH38T0018681	Proximal	ENSG00000099364.16, ENSG00000260852.1	FBXL19 , FBXL19-AS1	protein_coding, lncRNA	4349	Y	---
ZH38T0049695	Proximal	ENSG00000196781.15, ENSG00000233926.1	TLE1 , AL591368.1	protein_coding, lncRNA	4324	Y	---
ZH38T0040336	TSS	ENSG00000202515.1	VTRNA1-3	misc_RNA	4304	Y	---
ZH38T0008807	Proximal	ENSG00000283926.1, ENSG00000284155.1	MIR192 , MIR194-2	miRNA, miRNA	4278	Y	---
ZH38T0039877	TSS	ENSG00000271918.1	AC034236.2	lncRNA	4237	Y	---
ZH38T0052370	Exon	ENSG00000182195.8	LDOC1	protein_coding	4237	Y	---
ZH38T0006033	TSS	ENSG00000213025.2	COX20P1	processed_pseudogene	4224	Y	---
ZH38T0047422	Proximal	ENSG00000157168.20	NRG1	protein_coding	4180	---	Y
ZH38T0013922	TSS	ENSG00000228824.7	MIR4500HG	lncRNA	4173	---	Y
ZH38T0047773	Proximal	ENSG00000180828.2	BHLHE22	protein_coding	4131	Y	---
ZH38T0008890	Proximal	ENSG00000275948.1	RF01684	sRNA	4120	Y	---
ZH38T0014084	Proximal	ENSG00000204442.3	FAM155A	protein_coding	4115	Y	---
ZH38T0051766	TSS	ENSG00000229807.12	XIST	lncRNA	4083	Y	---
ZH38T0009957	TSS	ENSG00000278376.1	AP004609.3	lncRNA	4032	Y	---
ZH38T0036512	TSS	ENSG00000178597.7	PSAPL1	protein_coding	4017	Y	---
ZH38T0017155	Proximal	ENSG00000140398.13, ENSG00000275645.1	NEIL1 , AC068338.3	protein_coding, lncRNA	3991	Y	---
ZH38T0032271	Proximal	ENSG00000099949.21, ENSG00000272829.1	LZTR1 , AC002470.1	protein_coding, lncRNA	3991	Y	---
ZH38T0019105	Proximal	ENSG00000102977.16	ACD	protein_coding	3990	Y	---
ZH38T0003502	Proximal	ENSG00000213080.3	AL354714.2	processed_pseudogene	3963	Y	---
ZH38T0000488	TSS	ENSG00000206652.1	RNU1-1	snRNA	3949	Y	---
ZH38T0046957	Proximal	ENSG00000253958.1	CLDN23	protein_coding	3946	Y	---
ZH38T0008827	TSS	ENSG00000174276.6	ZNHIT2	protein_coding	3942	---	Y
ZH38T0003198	Proximal	ENSG00000231064.7, ENSG00000284586.1	AC234582.1 , MIR92B	lncRNA, miRNA	3932	Y	---
ZH38T0020092	Exon	ENSG00000196544.7	BORCS6	protein_coding	3925	Y	---
ZH38T0032601	Proximal	ENSG00000100105.18, ENSG00000213888.3	PATZ1 , LINC01521	protein_coding, lncRNA	3924	Y	---
ZH38T0000856	TSS	ENSG00000142733.17	MAP3K6	protein_coding	3899	---	Y
ZH38T0051880	TSS	ENSG00000165194.15	PCDH19	protein_coding	3896	Y	---
ZH38T0051571	TSS	ENSG00000184083.12	FAM120C	protein_coding	3876	Y	---
ZH38T0030233	Proximal	ENSG00000125826.20	RBCK1	protein_coding	3852	---	Y
ZH38T0004868	TSS	ENSG00000116903.7	EXOC8	protein_coding	3791	Y	---
ZH38T0049420	TSS	ENSG00000122741.16	DCAF10	protein_coding	3730	---	Y
ZH38T0012952	TSS	ENSG00000182782.7	HCAR2	protein_coding	3714	---	Y
ZH38T0008877	Exon	ENSG00000245532.9	NEAT1	lncRNA	3709	Y	---
ZH38T0026631	Exon	ENSG00000143878.9	RHOB	protein_coding	3654	Y	---
ZH38T0001636	TSS	ENSG00000006555.11	TTC22	protein_coding	3654	---	Y
ZH38T0026630	Exon	ENSG00000143878.9	RHOB	protein_coding	3639	Y	---
ZH38T0002741	TSS	ENSG00000238825.1	RNU1-13P	snRNA	3612	Y	---
ZH38T0011099	Proximal	ENSG00000151743.11, ENSG00000276900.1	AMN1 , AC023157.3	protein_coding, lncRNA	3570	---	Y
ZH38T0052557	TSS	ENSG00000207165.1	SNORA70	snoRNA	3570	---	Y
ZH38T0034639	Exon	ENSG00000269028.3	MTRNR2L12	protein_coding	3568	---	Y
ZH38T0000510	Proximal	ENSG00000272426.1	BX284668.6	lncRNA	3556	Y	---
ZH38T0028294	TSS	ENSG00000279227.1	AC009303.4	TEC	3507	---	Y
ZH38T0027080	TSS	ENSG00000223658.8	C1GALT1C1L	protein_coding	3502	Y	---
ZH38T0046036	TSS	ENSG00000253276.3	CCDC71L	protein_coding	3493	Y	---
ZH38T0041741	Proximal	ENSG00000234816.2, ENSG00000276410.3	HIST1H2APS5 , HIST1H2BB	unprocessed_pseudogene, protein_coding	3492	Y	---
ZH38T0028670	TSS	ENSG00000177519.4	RPRM	protein_coding	3483	---	Y
ZH38T0012798	Proximal	ENSG00000240342.3	RPS2P5	processed_pseudogene	3461	---	Y
ZH38T0000067	TSS	ENSG00000272106.1	AL691432.2	lncRNA	3397	Y	---
ZH38T0002815	Proximal	ENSG00000143401.15, ENSG00000222222.1	ANP32E , RNU2-17P	protein_coding, snRNA	3374	Y	---
ZH38T0017444	Proximal	ENSG00000259948.2	AC124068.1	processed_pseudogene	3364	Y	---
ZH38T0010614	TSS	ENSG00000279865.1	AC006511.3	TEC	3354	Y	---
ZH38T0018984	Proximal	ENSG00000224631.4	RPS27AP16	transcribed_processed_pseudogene	3346	Y	---
ZH38T0002843	Proximal	ENSG00000203804.4	ADAMTSL4-AS1	lncRNA	3344	Y	---
ZH38T0015579	Proximal	ENSG00000133958.13	UNC79	protein_coding	3333	Y	---
ZH38T0027932	TSS	ENSG00000232931.6	LINC00342	lncRNA	3328	---	Y
ZH38T0022498	TSS	ENSG00000177143.4	CETN1	protein_coding	3327	Y	---
ZH38T0040373	TSS	ENSG00000081853.15	PCDHGA2	protein_coding	3312	Y	---
ZH38T0020798	Proximal	ENSG00000167258.14	CDK12	protein_coding	3264	---	Y
ZH38T0018730	TSS	ENSG00000260267.1	AC026471.1	lncRNA	3261	---	Y
ZH38T0025719	TSS	ENSG00000268006.1	PTOV1-AS1	lncRNA	3237	Y	---
ZH38T0047747	Proximal	ENSG00000198363.18, ENSG00000264408.1	ASPH , MIR4470	protein_coding, miRNA	3227	Y	---
ZH38T0015535	Proximal	ENSG00000100796.17	PPP4R3A	protein_coding	3219	Y	---
ZH38T0018466	TSS	ENSG00000275441.1	AC020765.2	lncRNA	3218	---	Y
ZH38T0032661	TSS	ENSG00000253007.2, ENSG00000281295.1	SNORA50B , RF00407	snoRNA, snoRNA	3216	Y	---
ZH38T0006440	TSS	ENSG00000138135.6	CH25H	protein_coding	3186	Y	---
ZH38T0044858	Proximal	ENSG00000237004.4	ZNRF2P1	transcribed_processed_pseudogene	3182	Y	---
ZH38T0051763	Exon	ENSG00000229807.12	XIST	lncRNA	3148	---	Y
ZH38T0012159	Proximal	ENSG00000067798.16	NAV3	protein_coding	3140	Y	---
ZH38T0021945	TSS	ENSG00000267365.1	KCNJ2-AS1	lncRNA	3135	Y	---
ZH38T0008519	Proximal	ENSG00000110446.11	SLC15A3	protein_coding	3132	Y	---
ZH38T0030664	TSS	ENSG00000179772.7	FOXS1	protein_coding	3121	Y	---
ZH38T0004529	TSS	ENSG00000170385.10	SLC30A1	protein_coding	3113	---	Y
ZH38T0016516	Proximal	ENSG00000138606.19, ENSG00000260035.1	SHF , AC051619.8	protein_coding, lncRNA	3078	Y	---
ZH38T0013883	Proximal	ENSG00000136160.17	EDNRB	protein_coding	3078	---	Y
ZH38T0043220	TSS	ENSG00000184486.9	POU3F2	protein_coding	3062	---	Y
ZH38T0019973	TSS	ENSG00000169992.10	NLGN2	protein_coding	3055	Y	---
ZH38T0006653	TSS	ENSG00000203942.4	C10orf62	protein_coding	3022	Y	---
ZH38T0041246	Exon	ENSG00000054598.9	FOXC1	protein_coding	2990	---	Y
ZH38T0046272	Proximal	ENSG00000170775.2	GPR37	protein_coding	2987	Y	---
ZH38T0009885	Proximal	ENSG00000280143.1	AP000892.3	TEC	2981	---	Y
ZH38T0017309	Proximal	ENSG00000183496.6	MEX3B	protein_coding	2978	Y	---
ZH38T0040377	TSS	ENSG00000262576.3	PCDHGA4	protein_coding	2974	Y	---
ZH38T0012508	Proximal	ENSG00000120837.8	NFYB	protein_coding	2964	Y	---
ZH38T0031706	TSS	ENSG00000159082.17, ENSG00000238197.6	SYNJ1 , PAXBP1-AS1	protein_coding, lncRNA	2945	---	Y
ZH38T0035719	TSS	ENSG00000179674.3	ARL14	protein_coding	2906	---	Y
ZH38T0001409	TSS	ENSG00000202444.1	RNU5E-6P	snRNA	2901	Y	---
ZH38T0014411	Proximal	ENSG00000092068.20	SLC7A8	protein_coding	2900	Y	---
ZH38T0004882	Exon	ENSG00000212916.4	MAP10	protein_coding	2899	Y	---
ZH38T0044885	TSS	ENSG00000271122.1	AC018647.2	lncRNA	2894	Y	---
ZH38T0004059	TSS	ENSG00000231767.4	AL136454.1	protein_coding	2893	Y	---
ZH38T0034004	Proximal	ENSG00000076201.15, ENSG00000260236.1	PTPN23 , AC099778.1	protein_coding, lncRNA	2881	Y	---
ZH38T0025665	TSS	ENSG00000200259.1	SNORD35A	snoRNA	2873	Y	---
ZH38T0019318	TSS	ENSG00000274220.1	AC009163.6	lncRNA	2865	Y	---
ZH38T0052300	Exon	ENSG00000134590.13	RTL8C	protein_coding	2858	Y	---
ZH38T0044036	TSS	ENSG00000218426.5	AL590867.2	processed_pseudogene	2849	---	Y
ZH38T0039797	TSS	ENSG00000145743.15	FBXL17	protein_coding	2847	Y	---
ZH38T0037037	Proximal	ENSG00000145242.13	EPHA5	protein_coding	2838	Y	---
ZH38T0002787	Proximal	ENSG00000178096.9, ENSG00000184270.5	BOLA1 , HIST2H2AB	protein_coding, protein_coding	2830	Y	---
ZH38T0020748	TSS	ENSG00000277969.1	AC006449.6	lncRNA	2829	Y	---
ZH38T0017086	TSS	ENSG00000129038.16	LOXL1	protein_coding	2817	Y	---
ZH38T0014706	Proximal	ENSG00000183032.11, ENSG00000258708.1	SLC25A21 , SLC25A21-AS1	protein_coding, lncRNA	2810	Y	---
ZH38T0010587	TSS	ENSG00000255836.1	AC131206.1	processed_pseudogene	2806	Y	---
ZH38T0048925	TSS	ENSG00000205808.5	PLPP6	protein_coding	2785	---	Y
ZH38T0042076	Proximal	ENSG00000204520.13	MICA	protein_coding	2778	Y	---
ZH38T0033872	TSS	ENSG00000157119.11	KLHL40	protein_coding	2767	Y	---
ZH38T0012196	TSS	ENSG00000230291.5	AC078817.1	processed_pseudogene	2766	Y	---
ZH38T0000593	TSS	ENSG00000183114.8	FAM43B	protein_coding	2751	Y	---
ZH38T0012404	TSS	ENSG00000227825.4	SLC9A7P1	transcribed_processed_pseudogene	2738	Y	---
ZH38T0015022	Exon	ENSG00000182107.6	TMEM30B	protein_coding	2732	Y	---
ZH38T0044589	Proximal	ENSG00000213860.4, ENSG00000243004.6	RPL21P75 , AC005062.1	processed_pseudogene, lncRNA	2725	Y	---
ZH38T0003650	TSS	ENSG00000215835.2	AL596087.1	processed_pseudogene	2688	Y	---
ZH38T0031800	Proximal	ENSG00000273199.1	AP000692.2	lncRNA	2687	Y	---
ZH38T0025121	Proximal	ENSG00000268034.1	AC243960.2	processed_pseudogene	2682	---	Y
ZH38T0017960	Proximal	ENSG00000006194.10, ENSG00000281005.1	ZNF263 , LINC00921	protein_coding, lncRNA	2664	Y	---
ZH38T0006975	Proximal	ENSG00000150594.6	ADRA2A	protein_coding	2663	Y	---
ZH38T0011266	Proximal	ENSG00000187166.1	H1FNT	protein_coding	2642	---	Y
ZH38T0030518	Proximal	ENSG00000185052.11, ENSG00000287430.1	SLC24A3 , AL136090.2	protein_coding, lncRNA	2624	Y	---
ZH38T0040375	TSS	ENSG00000254245.2	PCDHGA3	protein_coding	2620	Y	---
ZH38T0036105	Proximal	ENSG00000145012.13, ENSG00000270959.1	LPP , LPP-AS2	protein_coding, lncRNA	2617	Y	---
ZH38T0042428	Proximal	ENSG00000265527.1	MIR5690	miRNA	2603	Y	---
ZH38T0014153	TSS	ENSG00000255874.2	LINC00346	lncRNA	2572	---	Y
ZH38T0041084	TSS	ENSG00000218227.3	AC136632.1	transcribed_processed_pseudogene	2552	---	Y
ZH38T0020459	TSS	ENSG00000004139.14	SARM1	protein_coding	2540	Y	---
ZH38T0051280	TSS	ENSG00000226781.1	TBCAP1	processed_pseudogene	2538	Y	---
ZH38T0012351	TSS	ENSG00000213250.5	RBMS2P1	processed_pseudogene	2528	Y	---
ZH38T0021723	TSS	ENSG00000253506.2	NACA2	protein_coding	2517	Y	---
ZH38T0030825	Exon	ENSG00000260032.2	NORAD	lncRNA	2517	Y	---
ZH38T0016107	TSS	ENSG00000185115.5	NSMCE3	protein_coding	2509	Y	---
ZH38T0030337	Exon	ENSG00000125817.8	CENPB	protein_coding	2503	Y	---
ZH38T0047186	TSS	ENSG00000168453.15	HR	protein_coding	2496	Y	---
ZH38T0027420	Proximal	ENSG00000143995.20	MEIS1	protein_coding	2478	---	Y
ZH38T0042489	TSS	ENSG00000226976.3	COX6A1P2	processed_pseudogene	2448	Y	---
ZH38T0049848	TSS	ENSG00000239183.1	SNORA84	snoRNA	2444	Y	---
ZH38T0031233	Proximal	ENSG00000171940.13	ZNF217	protein_coding	2442	---	Y
ZH38T0046814	TSS	ENSG00000130226.17	DPP6	protein_coding	2438	Y	---
ZH38T0040959	Proximal	ENSG00000113742.14	CPEB4	protein_coding	2432	Y	---
ZH38T0000237	Proximal	ENSG00000116285.13, ENSG00000238290.1	ERRFI1 , AL034417.2	protein_coding, lncRNA	2428	---	Y
ZH38T0016879	TSS	ENSG00000243403.1	AC090543.2	processed_pseudogene	2404	---	Y
ZH38T0001078	Proximal	ENSG00000116560.11	SFPQ	protein_coding	2373	---	Y
ZH38T0006636	TSS	ENSG00000181274.6	FRAT2	protein_coding	2369	Y	---
ZH38T0033530	Proximal	ENSG00000131386.19	GALNT15	protein_coding	2368	---	Y
ZH38T0028424	TSS	ENSG00000213225.7	NOC2LP1	transcribed_processed_pseudogene	2360	Y	---
ZH38T0011263	Exon	ENSG00000177875.4	CCDC184	protein_coding	2328	Y	---
ZH38T0000372	TSS	ENSG00000201801.1	RNU5E-4P	snRNA	2315	Y	---
ZH38T0011977	Proximal	ENSG00000255642.1, ENSG00000255850.2	PABPC1P4 , RXYLT1-AS1	processed_pseudogene, lncRNA	2314	---	Y
ZH38T0020896	Proximal	ENSG00000073584.20, ENSG00000278834.1	SMARCE1 , AC073508.3	protein_coding, lncRNA	2311	---	Y
ZH38T0045284	Proximal	ENSG00000158321.17	AUTS2	protein_coding	2300	---	Y
ZH38T0037733	TSS	ENSG00000275994.1	SNORA24	snoRNA	2291	Y	---
ZH38T0052129	Proximal	ENSG00000175556.16	LONRF3	protein_coding	2286	Y	---
ZH38T0039273	TSS	ENSG00000069020.18	MAST4	protein_coding	2286	---	Y
ZH38T0047590	Proximal	ENSG00000168522.13	FNTA	protein_coding	2282	Y	---
ZH38T0027421	Proximal	ENSG00000143995.20	MEIS1	protein_coding	2280	---	Y
ZH38T0012477	TSS	ENSG00000139352.4	ASCL1	protein_coding	2263	Y	---
ZH38T0025670	Proximal	ENSG00000200530.1	SNORD35B	snoRNA	2250	Y	---
ZH38T0005218	Exon	ENSG00000178363.4, ENSG00000256462.1	CALML3 , AL732437.1	protein_coding, lncRNA	2248	Y	---
ZH38T0031080	TSS	ENSG00000285796.1	AL162458.1	lncRNA	2239	Y	---
ZH38T0040713	TSS	ENSG00000231989.4	PPP1R2B	protein_coding	2231	Y	---
ZH38T0050114	TSS	ENSG00000187003.6	ACTL7A	protein_coding	2225	Y	---
ZH38T0014579	TSS	ENSG00000176165.10	FOXG1	protein_coding	2212	---	Y
ZH38T0019745	TSS	ENSG00000177602.5	HASPIN	protein_coding	2201	Y	---
ZH38T0042794	TSS	ENSG00000170950.5	PGK2	protein_coding	2199	Y	---
ZH38T0042162	Proximal	ENSG00000204388.7	HSPA1B	protein_coding	2186	Y	---
ZH38T0012089	Exon	ENSG00000133858.15	ZFC3H1	protein_coding	2139	Y	---
ZH38T0014900	TSS	ENSG00000288045.1	AL352979.4	lncRNA	2137	Y	---
ZH38T0044380	TSS	ENSG00000218823.2	PAPOLB	protein_coding	2136	---	Y
ZH38T0024525	Proximal	ENSG00000225178.5	RPSAP58	processed_pseudogene	2127	Y	---
ZH38T0032684	TSS	ENSG00000100302.7	RASD2	protein_coding	2125	---	Y
ZH38T0001416	TSS	ENSG00000281912.1	LINC01144	lncRNA	2108	Y	---
ZH38T0022746	TSS	ENSG00000212710.4	CTAGE1	protein_coding	2097	Y	---
ZH38T0033827	Proximal	ENSG00000234287.1	AC099560.2	processed_pseudogene	2082	Y	---
ZH38T0033423	Proximal	ENSG00000157152.17	SYN2	protein_coding	2076	Y	---
ZH38T0023127	TSS	ENSG00000049759.18	NEDD4L	protein_coding	2067	Y	---
ZH38T0003625	Proximal	ENSG00000213070.3	HMGB3P6	processed_pseudogene	2059	Y	---
ZH38T0009254	TSS	ENSG00000287425.1	AP003717.4	lncRNA	2053	Y	---
ZH38T0049780	Proximal	ENSG00000180447.7	GAS1	protein_coding	2047	---	Y
ZH38T0011262	TSS	ENSG00000177875.4	CCDC184	protein_coding	2046	Y	---
ZH38T0052292	Proximal	ENSG00000156504.16	FAM122B	protein_coding	2040	Y	---
ZH38T0016468	Proximal	ENSG00000227973.1	PIN4P1	processed_pseudogene	2030	Y	---
ZH38T0029203	Proximal	ENSG00000204253.4	HNRNPCP2	processed_pseudogene	2026	Y	---
ZH38T0040914	Proximal	ENSG00000120129.6	DUSP1	protein_coding	2025	Y	---
ZH38T0048968	Proximal	ENSG00000107077.18	KDM4C	protein_coding	2024	Y	---
ZH38T0029589	TSS	ENSG00000144583.5	2021-03-04	protein_coding	2023	Y	---
ZH38T0041922	Proximal	ENSG00000235238.1	SUMO2P1	processed_pseudogene	2001	Y	---
ZH38T0046393	Exon	ENSG00000286214.1	AUXG01000058.1	lncRNA	1991	Y	---
ZH38T0008886	Exon	ENSG00000245532.9	NEAT1	lncRNA	1980	Y	---
ZH38T0031676	TSS	ENSG00000182591.5	KRTAP11-1	protein_coding	1971	Y	---
ZH38T0040372	Proximal	ENSG00000204956.5	PCDHGA1	protein_coding	1964	Y	---
ZH38T0051833	TSS	ENSG00000196767.9	POU3F4	protein_coding	1964	Y	---
ZH38T0001417	TSS	ENSG00000186603.5	HPDL	protein_coding	1954	Y	---
ZH38T0009550	TSS	ENSG00000263465.4	SRSF8	protein_coding	1941	Y	---
ZH38T0042651	Proximal	ENSG00000112658.8	SRF	protein_coding	1931	Y	---
ZH38T0014560	TSS	ENSG00000257842.6	LINC02588	lncRNA	1926	---	Y
ZH38T0012834	TSS	ENSG00000277283.1	AC004812.2	lncRNA	1925	Y	---
ZH38T0034697	Proximal	ENSG00000154174.7, ENSG00000206535.8	TOMM70 , LNP1	protein_coding, protein_coding	1922	---	Y
ZH38T0030971	TSS	ENSG00000124196.5	GTSF1L	protein_coding	1920	---	Y
ZH38T0018965	TSS	ENSG00000276131.1	AC009118.2	lncRNA	1918	---	Y
ZH38T0045404	Proximal	ENSG00000146707.14	POMZP3	protein_coding	1910	---	Y
ZH38T0034405	TSS	ENSG00000144724.20	PTPRG	protein_coding	1908	Y	---
ZH38T0024335	TSS	ENSG00000207166.1	SNORA68	snoRNA	1889	Y	---
ZH38T0017920	Proximal	ENSG00000103363.14, ENSG00000276791.1	ELOB , AC092117.1	protein_coding, lncRNA	1886	Y	---
ZH38T0044248	Proximal	ENSG00000184465.16, ENSG00000185127.6, ENSG00000285733.1	WDR27 , C6orf120 , AL031315.1	protein_coding, protein_coding, protein_coding	1864	---	Y
ZH38T0046340	TSS	ENSG00000230359.5	TPI1P2	transcribed_processed_pseudogene	1864	---	Y
ZH38T0049487	TSS	ENSG00000229422.2	AL512625.2	lncRNA	1853	Y	---
ZH38T0002302	Proximal	ENSG00000270066.3, ENSG00000278249.1	AL356488.2 , SCARNA2	lncRNA, scaRNA	1842	Y	---
ZH38T0012055	Proximal	ENSG00000198812.4	LRRC10	protein_coding	1842	---	Y
ZH38T0004703	Proximal	ENSG00000236773.1	AC092809.3	processed_pseudogene	1834	Y	---
ZH38T0036491	Exon	ENSG00000170846.17	AC093323.1	protein_coding	1831	---	Y
ZH38T0040338	TSS	ENSG00000255408.4	PCDHA3	protein_coding	1824	---	Y
ZH38T0042677	TSS	ENSG00000112715.21	VEGFA	protein_coding	1821	Y	---
ZH38T0005476	TSS	ENSG00000279631.1	AL158211.5	TEC	1810	Y	---
ZH38T0041204	Proximal	ENSG00000146063.20, ENSG00000264732.1	TRIM41 , MIR4638	protein_coding, miRNA	1810	Y	---
ZH38T0017272	Proximal	ENSG00000180953.11, ENSG00000259332.3, ENSG00000259642.2	ST20 , ST20-MTHFS , ST20-AS1	protein_coding, protein_coding, lncRNA	1809	Y	---
ZH38T0025178	Exon	ENSG00000279539.1	AC006486.2	TEC	1809	Y	---
ZH38T0003095	TSS	ENSG00000272654.1	AL358472.2	lncRNA	1808	Y	---
ZH38T0018107	TSS	ENSG00000178257.3	PRM3	protein_coding	1806	Y	---
ZH38T0025489	Proximal	ENSG00000063169.10, ENSG00000277383.1	BICRA , AC010331.1	protein_coding, lncRNA	1804	---	Y
ZH38T0001315	Proximal	ENSG00000117385.15	P3H1	protein_coding	1803	---	Y
ZH38T0018131	Proximal	ENSG00000103342.13	GSPT1	protein_coding	1791	---	Y
ZH38T0013867	Proximal	ENSG00000278727.1	AC000403.1	lncRNA	1778	Y	---
ZH38T0016036	TSS	ENSG00000254585.5	MAGEL2	protein_coding	1775	---	Y
ZH38T0047394	Proximal	ENSG00000104671.8, ENSG00000271869.1	DCTN6 , AC026979.2	protein_coding, lncRNA	1770	---	Y
ZH38T0024469	Exon	ENSG00000268416.1	AC010329.1	lncRNA	1769	Y	---
ZH38T0014559	Proximal	ENSG00000139910.20	NOVA1	protein_coding	1760	---	Y
ZH38T0016915	TSS	ENSG00000200156.1	RNU5B-1	snRNA	1757	Y	---
ZH38T0008948	Exon	ENSG00000175602.3	CCDC85B	protein_coding	1755	Y	---
ZH38T0028716	Proximal	ENSG00000213189.5	BTF3L4P2	processed_pseudogene	1748	---	Y
ZH38T0002025	Proximal	ENSG00000230721.1	AL049597.1	processed_pseudogene	1746	Y	---
ZH38T0000509	TSS	ENSG00000272426.1	BX284668.6	lncRNA	1739	Y	---
ZH38T0052279	Proximal	ENSG00000207784.3	MIR542	miRNA	1728	---	Y
ZH38T0009886	Proximal	ENSG00000280143.1	AP000892.3	TEC	1727	---	Y
ZH38T0006491	TSS	ENSG00000221042.1	RF00622	ribozyme	1725	Y	---
ZH38T0023902	Proximal	ENSG00000161847.14, ENSG00000274425.1	RAVER1 , AC114271.1	protein_coding, lncRNA	1716	---	Y
ZH38T0008160	TSS	ENSG00000166016.6	ABTB2	protein_coding	1696	---	Y
ZH38T0008881	Exon	ENSG00000245532.9	NEAT1	lncRNA	1690	Y	---
ZH38T0033060	Proximal	ENSG00000234009.1	RPL5P34	processed_pseudogene	1688	Y	---
ZH38T0029833	Exon	ENSG00000169047.5	IRS1	protein_coding	1679	Y	---
ZH38T0039021	Proximal	ENSG00000177721.4	ANXA2R	protein_coding	1678	Y	---
ZH38T0017158	TSS	ENSG00000260274.1	AC068338.2	lncRNA	1676	Y	---
ZH38T0034180	Exon	ENSG00000068001.14	HYAL2	protein_coding	1666	Y	---
ZH38T0046575	Proximal	ENSG00000133597.11	ADCK2	protein_coding	1650	Y	---
ZH38T0003726	Proximal	ENSG00000116132.12	PRRX1	protein_coding	1647	---	Y
ZH38T0029778	Proximal	ENSG00000123999.5, ENSG00000124006.15	INHA , OBSL1	protein_coding, protein_coding	1635	Y	---
ZH38T0040380	TSS	ENSG00000262209.3	PCDHGB3	protein_coding	1634	Y	---
ZH38T0040367	TSS	ENSG00000113248.6	PCDHB15	protein_coding	1633	---	Y
ZH38T0028133	Proximal	ENSG00000135974.10, ENSG00000272994.1	C2orf49 , AC012360.3	protein_coding, lncRNA	1631	---	Y
ZH38T0002636	TSS	ENSG00000223612.3	AC241585.1	processed_pseudogene	1623	Y	---
ZH38T0035780	Proximal	ENSG00000213178.3	RPL22P1	processed_pseudogene	1616	---	Y
ZH38T0044811	Proximal	ENSG00000180233.11	ZNRF2	protein_coding	1615	Y	---
ZH38T0039322	Proximal	ENSG00000215006.4	CHCHD2P2	processed_pseudogene	1614	Y	---
ZH38T0027954	TSS	ENSG00000274286.2	ADRA2B	protein_coding	1598	Y	---
ZH38T0019201	TSS	ENSG00000223496.3	EXOSC6	protein_coding	1597	---	Y
ZH38T0024931	Proximal	ENSG00000104824.17	HNRNPL	protein_coding	1596	Y	---
ZH38T0012353	TSS	ENSG00000278916.1	CEP83-DT	lncRNA	1595	---	Y
ZH38T0013827	Proximal	ENSG00000236972.2	FABP5P1	processed_pseudogene	1589	Y	---
ZH38T0024093	Exon	ENSG00000171223.6	JUNB	protein_coding	1587	Y	---
ZH38T0050231	TSS	ENSG00000095397.14	WHRN	protein_coding	1587	Y	---
ZH38T0014621	Proximal	ENSG00000100852.13, ENSG00000258655.2	ARHGAP5 , ARHGAP5-AS1	protein_coding, lncRNA	1587	---	Y
ZH38T0009962	Proximal	ENSG00000186174.12, ENSG00000264211.1	BCL9L , MIR4492	protein_coding, miRNA	1578	Y	---
ZH38T0019143	Proximal	ENSG00000167264.18, ENSG00000182810.6	DUS2 , DDX28	protein_coding, protein_coding	1577	Y	---
ZH38T0025412	TSS	ENSG00000277531.2	PNMA8C	protein_coding	1572	Y	---
ZH38T0042632	Proximal	ENSG00000124587.14	PEX6	protein_coding	1572	Y	---
ZH38T0015021	Exon	ENSG00000182107.6	TMEM30B	protein_coding	1562	---	Y
ZH38T0014658	Proximal	ENSG00000258738.1	AL121603.2	lncRNA	1560	---	Y
ZH38T0005468	TSS	ENSG00000286881.1	AL358780.1	lncRNA	1506	Y	---
ZH38T0046345	Proximal	ENSG00000238072.1	AC009244.1	processed_pseudogene	1496	Y	---
ZH38T0017289	Proximal	ENSG00000136379.12	ABHD17C	protein_coding	1494	---	Y
ZH38T0017604	TSS	ENSG00000185551.15	NR2F2	protein_coding	1489	Y	---
ZH38T0016567	Exon	ENSG00000255302.4	EID1	protein_coding	1486	---	Y
ZH38T0012954	TSS	ENSG00000196917.5	HCAR1	protein_coding	1481	Y	---
ZH38T0009984	Exon	ENSG00000188486.3	H2AFX	protein_coding	1479	Y	---
ZH38T0029770	Proximal	ENSG00000144591.18, ENSG00000268603.1	GMPPA , AC053503.5	protein_coding, lncRNA	1475	Y	---
ZH38T0008393	Proximal	ENSG00000208009.1	MIR130A	miRNA	1471	---	Y
ZH38T0031187	Proximal	ENSG00000172216.5	CEBPB	protein_coding	1469	Y	---
ZH38T0050474	Proximal	ENSG00000148339.12, ENSG00000171169.9	SLC25A25 , NAIF1	protein_coding, protein_coding	1466	Y	---
ZH38T0051503	Proximal	ENSG00000207758.1, ENSG00000207768.3	MIR532 , MIR188	miRNA, miRNA	1462	Y	---
ZH38T0026634	Exon	ENSG00000143878.9	RHOB	protein_coding	1462	---	Y
ZH38T0014526	TSS	ENSG00000136305.11	CIDEB	protein_coding	1452	Y	---
ZH38T0040378	TSS	ENSG00000253910.2	PCDHGB2	protein_coding	1452	---	Y
ZH38T0041526	TSS	ENSG00000145990.11	GFOD1	protein_coding	1450	---	Y
ZH38T0039137	Proximal	ENSG00000264281.3	AC016596.2	processed_pseudogene	1445	Y	---
ZH38T0035606	TSS	ENSG00000174948.6	GPR149	protein_coding	1443	---	Y
ZH38T0002613	TSS	ENSG00000252826.1	RNU1-92P	snRNA	1437	Y	---
ZH38T0000206	Proximal	ENSG00000162413.16	KLHL21	protein_coding	1437	---	Y
ZH38T0017687	Proximal	ENSG00000185596.16, ENSG00000259553.6	WASH3P , AC140725.1	transcribed_unprocessed_pseudogene, lncRNA	1437	---	Y
ZH38T0019695	TSS	ENSG00000287553.1	AC090617.10	lncRNA	1432	---	Y
ZH38T0046686	TSS	ENSG00000281189.1	GHET1	lncRNA	1427	Y	---
ZH38T0049934	TSS	ENSG00000271155.1	AL161729.1	lncRNA	1426	---	Y
ZH38T0003477	Proximal	ENSG00000235082.2	SUMO1P3	processed_pseudogene	1425	Y	---
ZH38T0017826	TSS	ENSG00000206811.1	SNORA10	snoRNA	1410	Y	---
ZH38T0021886	TSS	ENSG00000265100.1	AC005332.1	lncRNA	1406	Y	---
ZH38T0044961	Proximal	ENSG00000259826.1	AC072061.1	lncRNA	1398	Y	---
ZH38T0029890	Proximal	ENSG00000250011.1	HMGB1P3	processed_pseudogene	1392	Y	---
ZH38T0014148	Proximal	ENSG00000153487.12	ING1	protein_coding	1392	---	Y
ZH38T0049223	Proximal	ENSG00000237984.3, ENSG00000281128.2	PTENP1 , PTENP1-AS	transcribed_processed_pseudogene, lncRNA	1390	Y	---
ZH38T0027219	TSS	ENSG00000178021.11	TSPYL6	protein_coding	1389	Y	---
ZH38T0013319	Proximal	ENSG00000122042.9	UBL3	protein_coding	1388	Y	---
ZH38T0032961	TSS	ENSG00000172404.4	DNAJB7	protein_coding	1376	Y	---
ZH38T0015199	Proximal	ENSG00000100678.18	SLC8A3	protein_coding	1374	Y	---
ZH38T0032799	TSS	ENSG00000189060.5	H1F0	protein_coding	1372	Y	---
ZH38T0051354	Proximal	ENSG00000189221.9	MAOA	protein_coding	1368	---	Y
ZH38T0012308	TSS	ENSG00000277738.1	AC126175.1	lncRNA	1366	Y	---
ZH38T0003146	Proximal	ENSG00000143603.19	KCNN3	protein_coding	1365	---	Y
ZH38T0000134	TSS	ENSG00000169717.6	ACTRT2	protein_coding	1360	Y	---
ZH38T0002113	TSS	ENSG00000207523.1	SNORA66	snoRNA	1358	Y	---
ZH38T0046392	Exon	ENSG00000286214.1	AUXG01000058.1	lncRNA	1356	---	Y
ZH38T0034765	Proximal	ENSG00000138483.2	CCDC54	protein_coding	1352	Y	---
ZH38T0020243	Proximal	ENSG00000226478.3	UPF3AP1	processed_pseudogene	1351	Y	---
ZH38T0036280	TSS	ENSG00000270170.2	NCBP2AS2	protein_coding	1350	Y	---
ZH38T0041459	Proximal	ENSG00000111846.17	GCNT2	protein_coding	1350	Y	---
ZH38T0024514	TSS	ENSG00000267934.1	AC010300.1	lncRNA	1345	Y	---
ZH38T0020090	Proximal	ENSG00000283160.1	MIR4521	miRNA	1344	Y	---
ZH38T0026633	Exon	ENSG00000143878.9	RHOB	protein_coding	1337	Y	---
ZH38T0008595	TSS	ENSG00000279491.1	AP003733.4	TEC	1335	---	Y
ZH38T0012763	Proximal	ENSG00000135111.16	TBX3	protein_coding	1334	---	Y
ZH38T0002638	Proximal	ENSG00000207501.1, ENSG00000276216.1	RNVU1-14 , AC245014.3	snRNA, lncRNA	1328	Y	---
ZH38T0051760	Exon	ENSG00000229807.12	XIST	lncRNA	1328	Y	---
ZH38T0012144	Proximal	ENSG00000243071.1	AC107032.1	processed_pseudogene	1324	---	Y
ZH38T0043371	Proximal	ENSG00000217041.1	AL512430.2	processed_pseudogene	1321	---	Y
ZH38T0051328	Proximal	ENSG00000124486.13	USP9X	protein_coding	1312	Y	---
ZH38T0014157	Proximal	ENSG00000277767.1	AL442128.2	lncRNA	1311	---	Y
ZH38T0036929	TSS	ENSG00000212588.1	SNORA26	snoRNA	1310	Y	---
ZH38T0009976	Proximal	ENSG00000255114.1	AP003392.3	lncRNA	1306	Y	---
ZH38T0041767	Exon	ENSG00000276966.2	HIST1H4E	protein_coding	1293	Y	---
ZH38T0051195	TSS	ENSG00000201592.1	RF00494	snoRNA	1288	Y	---
ZH38T0031443	TSS	ENSG00000268858.2	AL118506.1	lncRNA	1286	Y	---
ZH38T0031673	TSS	ENSG00000186977.2	KRTAP19-5	protein_coding	1283	---	Y
ZH38T0026438	TSS	ENSG00000271855.1	AC073195.1	lncRNA	1281	Y	---
ZH38T0044780	Proximal	ENSG00000255690.2	TRIL	protein_coding	1280	Y	---
ZH38T0037087	TSS	ENSG00000145309.6	CABS1	protein_coding	1273	Y	---
ZH38T0029407	Proximal	ENSG00000204217.14, ENSG00000273456.1	BMPR2 , AC064836.3	protein_coding, lncRNA	1272	Y	---
ZH38T0037283	TSS	ENSG00000196475.5	GK2	protein_coding	1269	---	Y
ZH38T0045791	Proximal	ENSG00000146826.17	MAP11	protein_coding	1266	Y	---
ZH38T0044427	TSS	ENSG00000207217.1	SNORA80D	snoRNA	1262	Y	---
ZH38T0032198	Proximal	ENSG00000185608.8	MRPL40	protein_coding	1258	Y	---
ZH38T0041752	Proximal	ENSG00000180573.9	HIST1H2AC	protein_coding	1258	Y	---
ZH38T0026267	Proximal	ENSG00000083845.9, ENSG00000266640.1	RPS5 , MIR4754	protein_coding, miRNA	1257	Y	---
ZH38T0021033	Proximal	ENSG00000173757.9, ENSG00000278829.1	STAT5B , AC099811.5	protein_coding, lncRNA	1252	Y	---
ZH38T0014856	Proximal	ENSG00000100505.13	TRIM9	protein_coding	1242	Y	---
ZH38T0032431	Exon	ENSG00000279110.1	AL022323.4	lncRNA	1242	Y	---
ZH38T0049951	TSS	ENSG00000286835.1	AL133477.2	lncRNA	1241	Y	---
ZH38T0052127	TSS	ENSG00000175556.16	LONRF3	protein_coding	1235	Y	---
ZH38T0029932	TSS	ENSG00000177673.3	TEX44	protein_coding	1234	---	Y
ZH38T0014160	Proximal	ENSG00000102606.18, ENSG00000285856.1	ARHGEF7 , AL353704.1	protein_coding, lncRNA	1233	---	Y
ZH38T0014107	Proximal	ENSG00000285534.1	AL163541.1	lncRNA	1232	Y	---
ZH38T0049366	Proximal	ENSG00000159899.14	NPR2	protein_coding	1231	---	Y
ZH38T0041844	Proximal	ENSG00000273703.1	HIST1H2BM	protein_coding	1230	Y	---
ZH38T0047671	Proximal	ENSG00000047249.18	ATP6V1H	protein_coding	1230	Y	---
ZH38T0021578	TSS	ENSG00000274213.1	AC015912.3	lncRNA	1226	---	Y
ZH38T0026583	TSS	ENSG00000214842.5	RAD51AP2	protein_coding	1224	Y	---
ZH38T0012277	Proximal	ENSG00000139318.8, ENSG00000274021.1	DUSP6 , AC024909.1	protein_coding, lncRNA	1219	Y	---
ZH38T0030130	TSS	ENSG00000287049.1	AC124862.1	lncRNA	1215	Y	---
ZH38T0048282	Proximal	ENSG00000169946.14	ZFPM2	protein_coding	1212	Y	---
ZH38T0004821	Proximal	ENSG00000181201.3	HIST3H2BA	unitary_pseudogene	1209	Y	---
ZH38T0035422	TSS	ENSG00000268129.1	AC026304.1	lncRNA	1207	---	Y
ZH38T0024145	TSS	ENSG00000160888.7	IER2	protein_coding	1203	Y	---
ZH38T0040845	Proximal	ENSG00000113645.14	WWC1	protein_coding	1202	---	Y
ZH38T0022842	Proximal	ENSG00000153339.14	TRAPPC8	protein_coding	1200	Y	---
ZH38T0021611	TSS	ENSG00000229590.3	MSX2P1	processed_pseudogene	1196	Y	---
ZH38T0022924	Proximal	ENSG00000175886.10	RPL7AP66	processed_pseudogene	1195	---	Y
ZH38T0014180	TSS	ENSG00000274922.1	AL139384.1	lncRNA	1192	Y	---
ZH38T0025181	Proximal	ENSG00000079432.7	CIC	protein_coding	1192	Y	---
ZH38T0035258	Proximal	ENSG00000081307.12, ENSG00000240303.8	UBA5 , ACAD11	protein_coding, protein_coding	1188	Y	---
ZH38T0051578	Proximal	ENSG00000102302.8	FGD1	protein_coding	1188	Y	---
ZH38T0046685	TSS	ENSG00000202354.1	RNY3	misc_RNA	1186	Y	---
ZH38T0046712	Proximal	ENSG00000276538.1	AC092666.2	unprocessed_pseudogene	1177	---	Y
[truncated: 513 more rows]

## Sheet: Table S3F
Supplemental Table S3F. Unannotated transcript TSSs
[truncated: 4,130 more rows]

[truncated: 1 more sheets: Table S3G]
