# Supplementary material for: Integration of high-resolution promoter profiling assays reveals novel, cell type–specific transcription start sites across 115 human cell and tissue types
Source: HighWire-hosted journal article supplement (doi:10.1101/gr.275723.121), 2021-12-23
Supplement: Supplemental_Table_S4.xlsx [file Supplemental_Table_S4.xlsx]

## Sheet: Contents
Supplemental Table S4. Enrichment for RAMPAGE rPeaks features stratified by TSS class
Supplemental Table S4A	Average phastCons score
Supplemental Table S4B	Number of active biosamples
Supplemental Table S4C	Overlap with K562 PacBio reads
Supplemental Table S4D	Overlap with GM12878 PacBio reads
Supplemental Table S4E	Length of overlapping K562 PacBio reads
Supplemental Table S4F	Length of overlapping GM12878 PacBio reads
Supplemental Table S4G	Number of detected ORFs (K562)
Supplemental Table S4H	Number of detected ORFs (GM12878)

## Sheet: Table S4A
Supplemental Table S4A. Average phastCons scores
		p-values
TSS class	Median	Verified GENCODE TSS	Verified unannotated TSS	Candidate GENCODE TSS	Unannotated transcript TSS	Local transcription
Verified GENCODE TSS	0.15338	---	3.4e-06	0.9254	3.4e-06	0.0013
Verified unannotated TSS	0.136393	3.4e-06	---	0.1678	0.1082	0.5133
Candidate GENCODE TSS	0.152075	0.9254	0.1678	---	0.0398	0.1166
Unannotated transcript TSS	0.122691	3.4e-06	0.1082	0.0398	---	0.5132
Local transcription	0.13427	0.0013	0.5133	0.1166	0.5132	---

## Sheet: Table S4B
Supplemental Table S4B. Number of active biosamples
		p-values
TSS class	Median	Verified GENCODE TSS	Verified unannotated TSS	Candidate GENCODE TSS	Unannotated transcript TSS	Local transcription
Verified GENCODE TSS	42	---	< 1E-300	6.11857e-180	< 1E-300	< 1E-300
Verified unannotated TSS	5	< 1E-300	---	0.28	2.65107e-222	< 1E-300
Candidate GENCODE TSS	5	6.11857e-180	0.28	---	1.13064e-64	1.49504e-134
Unannotated transcript TSS	3	< 1E-300	2.65107e-222	1.13064e-64	---	3.90524e-40
Local transcription	2	< 1E-300	< 1E-300	1.49504e-134	3.90524e-40	---

## Sheet: Table S4C
Supplemental Table S4C. Overlap with K562 PacBio reads
		p-values
TSS class	Median	Verified GENCODE TSS	Verified unannotated TSS	Candidate GENCODE TSS	Unannotated transcript TSS	Local transcription
Verified GENCODE TSS	24	---	< 1E-300	2.66577e-35	1.80966e-122	1.60937e-99
Verified unannotated TSS	3	< 1E-300	---	0.000910052	1.77262e-19	6.72243e-45
Candidate GENCODE TSS	1	2.66577e-35	0.000910052	---	0.06126	1.42602e-13
Unannotated transcript TSS	1	1.80966e-122	1.77262e-19	0.06126	---	2.77496e-14
Local transcription	0	1.60937e-99	6.72243e-45	1.42602e-13	2.77496e-14	---

## Sheet: Table S4D
Supplemental Table S4D. Overlap with GM12878 PacBio reads
		p-values
TSS class	Median	Verified GENCODE TSS	Verified unannotated TSS	Candidate GENCODE TSS	Unannotated transcript TSS	Local transcription
Verified GENCODE TSS	30	---	4.78392e-287	8.22512e-20	9.49185e-77	2.73356e-37
Verified unannotated TSS	4	4.78392e-287	---	0.2243	3.08235e-13	5.26719e-18
Candidate GENCODE TSS	2	8.22512e-20	0.2243	---	0.00385408	1.34859e-09
Unannotated transcript TSS	1	9.49185e-77	3.08235e-13	0.00385408	---	5.20685e-07
Local transcription	0	2.73356e-37	5.26719e-18	1.34859e-09	5.20685e-07	---

## Sheet: Table S4E
Supplemental Table S4E. Length of overlapping K562 PacBio reads
			Verified GENCODE TSS	Verified unannotated TSS					Candidate GENCODE TSS			Unannotated transcript TSS					Local transcription
TSS class	Genomic context	Median	TSS	TSS	TSS-proximal	Exon	Intron	Intergenic	TSS	TSS-proximal	Exon	TSS	TSS-proximal	Exon	Intron	Intergenic	TSS	Proximal	Intron	Intergenic
Verified GENCODE TSS	TSS	6737	---	< 1E-300	< 1E-300	4.48315e-285	2.26908e-140	1.02446e-136	< 1E-300	< 1E-300	2.91864e-06	< 1E-300	2.59417e-260	1.06849e-10	3.26589e-05	0.000146447	0.00133263	2.27348e-08	7.99892e-229	2.01102e-18
Verified unannotated TSS	TSS	435	< 1E-300	---	< 1E-300	< 1E-300	< 1E-300	< 1E-300	4.93005e-51	1.52401e-117	0.304548	1.06845e-191	4.23475e-15	0.189478	5.64251e-32	3.72746e-154	0.00257664	0.000354172	1.45177e-23	2.71567e-06
	TSS-proximal	5439	< 1E-300	< 1E-300	---	0.0368068	4.30574e-282	2.72424e-151	< 1E-300	< 1E-300	2.47712e-05	< 1E-300	8.08563e-205	1.47209e-09	0.0642972	1.18957e-12	0.187621	1.38385e-06	6.87832e-190	1.02762e-13
	Exon	3355	4.48315e-285	< 1E-300	0.0368068	---	< 1E-300	9.9937e-181	< 1E-300	< 1E-300	2.47444e-06	< 1E-300	9.97969e-224	6.41984e-11	0.828511	3.65285e-22	0.84472	2.83446e-07	9.85189e-206	1.14597e-19
	Intron	9915	2.26908e-140	< 1E-300	4.30574e-282	< 1E-300	---	6.06499e-53	< 1E-300	< 1E-300	4.62871e-06	< 1E-300	7.7271e-222	1.49063e-10	9.88386e-16	0.0121077	0.000138992	3.8065e-09	4.7963e-210	8.07595e-18
	Intergenic	36873	1.02446e-136	< 1E-300	2.72424e-151	9.9937e-181	6.06499e-53	---	3.00999e-287	7.42814e-208	4.13352e-05	1.00413e-280	9.18206e-134	7.81605e-09	5.93389e-22	3.41236e-18	0.000105173	3.7101e-09	7.22062e-118	8.1581e-15
Candidate GENCODE TSS	TSS	654	< 1E-300	4.93005e-51	< 1E-300	< 1E-300	< 1E-300	3.00999e-287	---	8.05251e-85	0.992759	7.11549e-38	0.0573472	0.0223151	6.95392e-39	5.724e-163	1.35308e-05	0.0042517	0.719198	6.54635e-05
	TSS-proximal	747	< 1E-300	1.52401e-117	< 1E-300	< 1E-300	< 1E-300	7.42814e-208	8.05251e-85	---	0.00354123	4.31202e-27	2.9513e-17	7.25366e-07	2.02034e-25	2.22628e-108	1.53713e-05	0.940475	3.59042e-66	0.98045
	Exon	484	2.91864e-06	0.304548	2.47712e-05	2.47444e-06	4.62871e-06	4.13352e-05	0.992759	0.00354123	---	0.0135586	0.939149	0.442777	0.000201002	2.46344e-05	0.000430339	0.0318867	0.017047	0.00684439
Unannotated transcript TSS	TSS	824	< 1E-300	1.06845e-191	< 1E-300	< 1E-300	< 1E-300	1.00413e-280	7.11549e-38	4.31202e-27	0.0135586	---	0.02481	4.04924e-06	3.63184e-37	1.22483e-153	3.23214e-06	0.134009	1.31767e-20	0.000316334
	TSS-proximal	864.5	2.59417e-260	4.23475e-15	8.08563e-205	9.97969e-224	7.7271e-222	9.18206e-134	0.0573472	2.9513e-17	0.939149	0.02481	---	0.0128122	8.25793e-28	4.43474e-89	3.94265e-05	0.13585	0.0413561	0.00193335
	Exon	496	1.06849e-10	0.189478	1.47209e-09	6.41984e-11	1.49063e-10	7.81605e-09	0.0223151	7.25366e-07	0.442777	4.04924e-06	0.0128122	---	6.87773e-08	1.81401e-09	0.00014595	0.000572292	2.91864e-06	6.24396e-05
	Intron	5379	3.26589e-05	5.64251e-32	0.0642972	0.828511	9.88386e-16	5.93389e-22	6.95392e-39	2.02034e-25	0.000201002	3.63184e-37	8.25793e-28	6.87773e-08	---	2.59562e-06	0.193879	0.00204729	1.24157e-33	2.93566e-06
	Intergenic	13419	0.000146447	3.72746e-154	1.18957e-12	3.65285e-22	0.0121077	3.41236e-18	5.724e-163	2.22628e-108	2.46344e-05	1.22483e-153	4.43474e-89	1.81401e-09	2.59562e-06	---	0.038079	2.65859e-06	2.46474e-94	6.41984e-11
Local transcription	TSS	3305	0.00133263	0.00257664	0.187621	0.84472	0.000138992	0.000105173	1.35308e-05	1.53713e-05	0.000430339	3.23214e-06	3.94265e-05	0.00014595	0.193879	0.038079	---	0.0250127	1.93059e-06	0.000270601
	Proximal	1019	2.27348e-08	0.000354172	1.38385e-06	2.83446e-07	3.8065e-09	3.7101e-09	0.0042517	0.940475	0.0318867	0.134009	0.13585	0.000572292	0.00204729	2.65859e-06	0.0250127	---	8.92975e-05	0.657704
	Intron	650	7.99892e-229	1.45177e-23	6.87832e-190	9.85189e-206	4.7963e-210	7.22062e-118	0.719198	3.59042e-66	0.017047	1.31767e-20	0.0413561	2.91864e-06	1.24157e-33	2.46474e-94	1.93059e-06	8.92975e-05	---	1.14234e-08
	Intergenic	1213.5	2.01102e-18	2.71567e-06	1.02762e-13	1.14597e-19	8.07595e-18	8.1581e-15	6.54635e-05	0.98045	0.00684439	0.000316334	0.00193335	6.24396e-05	2.93566e-06	6.41984e-11	0.000270601	0.657704	1.14234e-08	---

## Sheet: Table S4F
Supplemental Table S4F. Length of overlapping GM12878 PacBio reads
			Verified GENCODE TSS	Verified unannotated TSS					Candidate GENCODE TSS			Unannotated transcript TSS					Local transcription
TSS class	Genomic context	Median	TSS	TSS	TSS-proximal	Exon	Intron	Intergenic	TSS	TSS-proximal	Exon	TSS	TSS-proximal	Exon	Intron	Intergenic	Proximal	Intron	Intergenic
Verified GENCODE TSS	TSS	6621	---	< 1E-300	< 1E-300	< 1E-300	< 1E-300	1.3985e-85	< 1E-300	< 1E-300	1.04587e-116	< 1E-300	< 1E-300	0.000203672	4.39794e-13	3.58666e-29	0.0029061	2.39511e-11	0.00101432
Verified unannotated TSS	TSS	609	< 1E-300	---	< 1E-300	< 1E-300	< 1E-300	< 1E-300	8.71961e-09	8.7166e-27	5.34368e-18	6.97481e-20	2.88989e-42	0.332394	2.4222e-14	1.67948e-154	1.74713e-16	0.41743	0.878427
	TSS-proximal	4940.5	< 1E-300	< 1E-300	---	1.57874e-125	< 1E-300	6.81826e-116	< 1E-300	< 1E-300	1.00453e-104	< 1E-300	< 1E-300	0.00153634	2.19345e-05	8.16672e-40	0.558808	8.73765e-08	0.00542486
	Exon	2873	< 1E-300	< 1E-300	1.57874e-125	---	< 1E-300	7.8087e-286	< 1E-300	< 1E-300	5.91883e-113	< 1E-300	< 1E-300	0.000170267	0.0130163	9.58664e-98	2.81536e-05	8.72367e-12	0.00457719
	Intron	31384	< 1E-300	< 1E-300	< 1E-300	< 1E-300	---	1.26053e-05	< 1E-300	< 1E-300	3.63292e-114	< 1E-300	< 1E-300	0.000208616	2.43544e-31	1.9677e-06	7.43368e-28	2.37739e-11	0.000191121
	Intergenic	17578	1.3985e-85	< 1E-300	6.81826e-116	7.8087e-286	1.26053e-05	---	< 1E-300	< 1E-300	1.02186e-93	< 1E-300	< 1E-300	0.000402619	8.07171e-24	0.298891	4.57431e-21	3.544e-10	0.000387442
Candidate GENCODE TSS	TSS	656	< 1E-300	8.71961e-09	< 1E-300	< 1E-300	< 1E-300	< 1E-300	---	1.47309e-18	5.6161e-62	9.55918e-22	1.07393e-147	0.452994	1.41418e-17	2.51514e-164	1.48098e-17	0.469293	0.997244
	TSS-proximal	699	< 1E-300	8.7166e-27	< 1E-300	< 1E-300	< 1E-300	< 1E-300	1.47309e-18	---	5.15474e-57	2.30349e-14	< 1E-300	0.909217	9.56881e-18	2.19617e-165	2.68176e-13	0.216958	0.979706
	Exon	364	1.04587e-116	5.34368e-18	1.00453e-104	5.91883e-113	3.63292e-114	1.02186e-93	5.6161e-62	5.15474e-57	---	1.80647e-57	2.54854e-55	0.914071	2.18826e-27	2.78607e-73	1.40136e-19	8.22534e-07	0.00255203
Unannotated transcript TSS	TSS	823	< 1E-300	6.97481e-20	< 1E-300	< 1E-300	< 1E-300	< 1E-300	9.55918e-22	2.30349e-14	1.80647e-57	---	0	0.997244	1.79926e-19	3.52326e-171	4.41409e-13	0.192657	0.26363
	TSS-proximal	558	< 1E-300	2.88989e-42	< 1E-300	< 1E-300	< 1E-300	< 1E-300	1.07393e-147	< 1E-300	2.54854e-55	< 1E-300	---	0.624568	1.47117e-44	5.64628e-183	1.19877e-16	5.8394e-06	0.183767
	Exon	1135	0.000203672	0.332394	0.00153634	0.000170267	0.000208616	0.000402619	0.452994	0.909217	0.914071	0.997244	0.624568	---	0.0182154	0.000400762	0.082729	0.988859	1
	Intron	2316.5	4.39794e-13	2.4222e-14	2.19345e-05	0.0130163	2.43544e-31	8.07171e-24	1.41418e-17	9.56881e-18	2.18826e-27	1.79926e-19	1.47117e-44	0.0182154	---	5.85046e-21	0.0261593	0.00240349	0.0756687
	Intergenic	15270.5	3.58666e-29	1.67948e-154	8.16672e-40	9.58664e-98	1.9677e-06	0.298891	2.51514e-164	2.19617e-165	2.78607e-73	3.52326e-171	5.64628e-183	0.000400762	5.85046e-21	---	2.70987e-19	4.9425e-10	0.000299212
Local transcription	Proximal	10647	0.0029061	1.74713e-16	0.558808	2.81536e-05	7.43368e-28	4.57431e-21	1.48098e-17	2.68176e-13	1.40136e-19	4.41409e-13	1.19877e-16	0.082729	0.0261593	2.70987e-19	---	0.00874756	0.0709397
	Intron	670.5	2.39511e-11	0.41743	8.73765e-08	8.72367e-12	2.37739e-11	3.544e-10	0.469293	0.216958	8.22534e-07	0.192657	5.8394e-06	0.988859	0.00240349	4.9425e-10	0.00874756	---	0.671089
	Intergenic	709.5	0.00101432	0.878427	0.00542486	0.00457719	0.000191121	0.000387442	0.997244	0.979706	0.00255203	0.26363	0.183767	1	0.0756687	0.000299212	0.0709397	0.671089	---

## Sheet: Table S4G
Supplemental Table S4G. Number of detected ORFs (K562)
		p-values
TSS class	Median	Verified GENCODE TSS	Verified unannotated TSS	Candidate GENCODE TSS	Unannotated transcript TSS	Local transcription
Verified GENCODE TSS	55	---	2.81906e-270	1.14203e-24	1.84149e-77	2.08528e-33
Verified unannotated TSS	20	2.81906e-270	---	0.379124	1.16346e-11	3.17929e-13
Candidate GENCODE TSS	18	1.14203e-24	0.379124	---	0.000842034	5.36029e-08
Unannotated transcript TSS	14	1.84149e-77	1.16346e-11	0.000842034	---	9.16554e-05
Local transcription	9	2.08528e-33	3.17929e-13	5.36029e-08	9.16554e-05	---

## Sheet: Table S4H
Supplemental Table S4H. Number of detected ORFs (GM12878)
		p-values
TSS class	Median	Verified GENCODE TSS	Verified unannotated TSS	Candidate GENCODE TSS	Unannotated transcript TSS	Local transcription
Verified GENCODE TSS	60	---	< 1E-300	1.4e-33	4.47e-102	1.69e-34
Verified unannotated TSS	21	< 1E-300	---	0.0607	8.72e-21	1.13e-15
Candidate GENCODE TSS	18	1.4e-33	0.0607	---	5.51e-05	1.81E-08
Unannotated transcript TSS	12	4.47e-102	8.72e-21	5.51e-05	---	0.000285
Local transcription	9	1.69e-34	1.13e-15	1.81E-08	0.000285	---
