# Supplementary material for: Integration of high-resolution promoter profiling assays reveals novel, cell type–specific transcription start sites across 115 human cell and tissue types
Source: HighWire-hosted journal article supplement (doi:10.1101/gr.275723.121), 2021-12-23
Supplement: Supplemental_Table_S5.xlsx [file Supplemental_Table_S5.xlsx]

## Sheet: Contents
Supplemental Table S5. Summary of GWAS intersections with RAMPAGE rPeaks
Supplemental Table S5A	Overlap of GWAS variants and RAMPAGE rPeaks
Supplemental Table S5B	GWAS phenotypes with biosample specific RAMPAGE rPeak enrichments
Supplemental Table S5C	Genes linked with verified TSSs that overlap GWAS SNPs
Supplemental Table S5D	GWAS associations for rs2620666
Supplemental Table S5E	RAMPAGE signal at ZH38T0048822
Supplemental Table S5F	GTEx eQTLs of rs2620666
Supplemental Table S5G	RAMPAGE signal at ZH38T0028803
Supplemental Table S5H	DNase-seq signal at ZH38T0028803

## Sheet: Table S5A
Supplemental Table S5A. Overlap of GWAS variants and RAMPAGE rPeaks
rPeak	Genetic context	TSS class	SNP	Lead SNP	LD (r2)	Phenotype	Study PMID	First author
ZH38T0000025	TSS	Verified GENCODE TSS	rs15842	rs3121567	0.91	Blood protein levels	30072576	Emilsson V
ZH38T0000025	TSS	Verified GENCODE TSS	rs4615788	rs3121567	0.91	Blood protein levels	30072576	Emilsson V
ZH38T0000096	TSS	Verified GENCODE TSS	rs2247560	rs2803328	0.72	Body mass index	26426971	Winkler TW
ZH38T0000096	TSS	Verified GENCODE TSS	rs2247560	rs4648729	0.73	Blood protein levels	30072576	Emilsson V
ZH38T0000126	Intron	Verified unannotated TSS	rs2495366	rs10797432	0.87	Ulcerative colitis	28067908	de Lange KM
ZH38T0000126	Intron	Verified unannotated TSS	rs2495366	rs6667605	0.86	Inflammatory bowel disease	26192919	Liu JZ
ZH38T0000127	Intron	Verified unannotated TSS	rs2234161	rs10797432	0.92	Ulcerative colitis	28067908	de Lange KM
ZH38T0000127	Intron	Verified unannotated TSS	rs2234161	rs6667605	0.9	Inflammatory bowel disease	26192919	Liu JZ
ZH38T0000131	TSS	Verified GENCODE TSS	rs12752515	rs2843401	0.94	Rheumatoid arthritis (ACPA-positive)	23143596	Eyre S
ZH38T0000131	TSS	Verified GENCODE TSS	rs12752515	rs3748816	0.86	Primary sclerosing cholangitis	27992413	Ji SG
ZH38T0000131	TSS	Verified GENCODE TSS	rs12752515	rs3748816	0.86	Primary sclerosing cholangitis	23603763	Liu JZ
ZH38T0000158	TSS	Verified GENCODE TSS	rs12126653	rs12135894	0.76	Mean corpuscular volume	27863252	Astle WJ
ZH38T0000204	TSS	Verified GENCODE TSS	rs6674407	rs14057	0.9	Systolic blood pressure	28135244	Warren HR
ZH38T0000229	TSS	Verified GENCODE TSS	rs17523802	rs3766606	0.99	Crohn's disease	28067908	de Lange KM
ZH38T0000229	TSS	Verified GENCODE TSS	rs17523802	rs3766606	0.99	Ulcerative colitis	28067908	de Lange KM
ZH38T0000229	TSS	Verified GENCODE TSS	rs17523802	rs35675666	0.99	Inflammatory bowel disease	23128233	Jostins L
ZH38T0000229	TSS	Verified GENCODE TSS	rs17523802	rs34878017	0.95	Blood protein levels	30072576	Emilsson V
ZH38T0000230	TSS	Verified GENCODE TSS	rs35675666	rs3766606	1	Crohn's disease	28067908	de Lange KM
ZH38T0000230	TSS	Verified GENCODE TSS	rs35675666	rs3766606	1	Ulcerative colitis	28067908	de Lange KM
ZH38T0000230	TSS	Verified GENCODE TSS	rs35675666	Lead	*	Inflammatory bowel disease	23128233	Jostins L
ZH38T0000230	TSS	Verified GENCODE TSS	rs35675666	rs34878017	0.94	Blood protein levels	30072576	Emilsson V
ZH38T0000363	TSS	Verified GENCODE TSS	rs13306560	rs12744757	0.72	Systolic blood pressure	28739976	Wain LV
ZH38T0000364	Proximal	Verified unannotated TSS	rs61764044	rs17376328	0.89	Systolic blood pressure	29615537	Kulminski AM
ZH38T0000364	Proximal	Verified unannotated TSS	rs61764044	rs17376328	0.89	Diastolic blood pressure	29615537	Kulminski AM
ZH38T0000435	TSS	Verified GENCODE TSS	rs2303195	rs12562037	0.87	Alcoholic chronic pancreatitis	28754779	Rosendahl J
ZH38T0000436	Intron	Verified unannotated TSS	rs2901964	rs3820068	0.9	Systolic blood pressure	28135244	Warren HR
ZH38T0000436	Intron	Verified unannotated TSS	rs2901964	rs1042010	0.93	Systolic blood pressure	28739976	Wain LV
ZH38T0000469	TSS	Verified GENCODE TSS	rs1572381	rs1048238	0.94	Systolic blood pressure	28739976	Wain LV
ZH38T0000469	TSS	Verified GENCODE TSS	rs732286	rs1048238	0.94	Systolic blood pressure	28739976	Wain LV
ZH38T0000469	TSS	Verified GENCODE TSS	rs945416	rs1048238	0.94	Systolic blood pressure	28739976	Wain LV
ZH38T0000469	TSS	Verified GENCODE TSS	rs1572381	rs848302	0.85	Glomerular filtration rate	29403010	Kanai M
ZH38T0000469	TSS	Verified GENCODE TSS	rs3738640	rs848302	0.81	Glomerular filtration rate	29403010	Kanai M
ZH38T0000469	TSS	Verified GENCODE TSS	rs732286	rs848302	0.85	Glomerular filtration rate	29403010	Kanai M
ZH38T0000469	TSS	Verified GENCODE TSS	rs945416	rs848302	0.85	Glomerular filtration rate	29403010	Kanai M
ZH38T0000470	TSS	Verified GENCODE TSS	rs945420	rs1048238	0.83	Systolic blood pressure	28739976	Wain LV
ZH38T0000470	TSS	Verified GENCODE TSS	rs3754329	rs848302	0.81	Glomerular filtration rate	29403010	Kanai M
ZH38T0000470	TSS	Verified GENCODE TSS	rs945420	rs848302	0.83	Glomerular filtration rate	29403010	Kanai M
ZH38T0000471	Intergenic	Verified unannotated TSS	rs6660685	rs10927875	0.72	Idiopathic dilated cardiomyopathy	21459883	Villard E
ZH38T0000553	TSS	Verified GENCODE TSS	rs6680255	rs144376466	0.93	Blood protein levels	30072576	Emilsson V
ZH38T0000554	TSS	Verified unannotated TSS	rs6680255	rs144376466	0.93	Blood protein levels	30072576	Emilsson V
ZH38T0000575	TSS	Verified GENCODE TSS	rs11573156	Lead	*	Blood protein levels	28240269	Suhre K
ZH38T0000575	TSS	Verified GENCODE TSS	rs11573156	Lead,rs2307246	*,0.94	Blood protein levels	29875488	Sun BB
ZH38T0000575	TSS	Verified GENCODE TSS	rs11573156	rs4744	0.95	Blood protein levels	30072576	Emilsson V
ZH38T0000590	Intron	Verified unannotated TSS	rs3767235	rs75810319	0.76	Cognitive performance (MTAG)	30038396	Lee JJ
ZH38T0000594	TSS	Verified GENCODE TSS	rs602950	rs66731853	0.85	Mean corpuscular volume	27863252	Astle WJ
ZH38T0000768	Proximal	Verified unannotated TSS	rs9438904	rs10903129	0.98	Erythrocyte sedimentation rate	21700265	Kullo IJ
ZH38T0000768	Proximal	Verified unannotated TSS	rs9438904	rs11802413	0.98	LDL cholesterol levels	28334899	Spracklen CN
ZH38T0000768	Proximal	Verified unannotated TSS	rs9438904	rs10903129	0.98	Total cholesterol levels	28334899	Spracklen CN
ZH38T0000830	TSS	Verified GENCODE TSS	rs71636780	rs12748152	0.78	HDL cholesterol levels	28334899	Spracklen CN
ZH38T0000830	TSS	Verified GENCODE TSS	rs71636780	rs12748152	0.78	LDL cholesterol levels	28334899	Spracklen CN
ZH38T0000892	Proximal	Verified unannotated TSS	rs11247790	rs10915222	0.7	Educational attainment (MTAG)	30038396	Lee JJ
ZH38T0000894	TSS	Verified GENCODE TSS	rs34320456	rs56272623	0.77	Night sleep phenotypes	27126917	Spada J
ZH38T0000899	TSS	Verified GENCODE TSS	rs11810945	rs56272623	0.77	Night sleep phenotypes	27126917	Spada J
ZH38T0000925	Proximal	Verified unannotated TSS	rs571080	rs1565716	0.82	Diastolic blood pressure	30224653	Evangelou E
ZH38T0000947	Proximal	Verified unannotated TSS	rs10914367	rs7549339	0.82	Body mass index	29615537	Kulminski AM
ZH38T0000951	Proximal	TSS unannotated transcript	rs10914377	rs2275436	0.95	Blood protein levels	30072576	Emilsson V
ZH38T0001155	Proximal	Verified unannotated TSS	rs41310438	rs61778082	0.98	Blood protein levels	30072576	Emilsson V
ZH38T0001352	TSS	Verified GENCODE TSS	rs839752	rs2275180	0.74	Blood protein levels	29875488	Sun BB
ZH38T0001352	TSS	Verified GENCODE TSS	rs839753	rs2494997	0.96	Cognitive performance (MTAG)	30038396	Lee JJ
ZH38T0001352	TSS	Verified GENCODE TSS	rs839752	rs1209384	0.72	Blood protein levels	30072576	Emilsson V
ZH38T0001352	TSS	Verified GENCODE TSS	rs839752	rs839755	1	Systolic blood pressure	30224653	Evangelou E
ZH38T0001422	TSS	Verified GENCODE TSS	rs3790583	rs72387598	0.92	Platelet distribution width	27863252	Astle WJ
ZH38T0001422	TSS	Verified GENCODE TSS	rs3790583	rs2055145	0.92	Educational attainment (MTAG)	30038396	Lee JJ
ZH38T0001422	TSS	Verified GENCODE TSS	rs3790583	rs12042903	0.98	General cognitive ability	29844566	Davies G
ZH38T0001423	TSS	Verified GENCODE TSS	rs3748643	rs4660306	0.98	Homocysteine levels	23824729	van Meurs JB
ZH38T0001428	Intergenic	Verified unannotated TSS	rs7534467	rs4660306	1	Homocysteine levels	23824729	van Meurs JB
ZH38T0001486	Intron	Local transcription	rs11211387	rs6663731	0.73	Blood metabolite levels	24816252	Shin SY
ZH38T0001486	Intron	Local transcription	rs11211387	rs6678639	0.76	Blood metabolite ratios	24816252	Shin SY
ZH38T0001486	Intron	Local transcription	rs11211387	rs3766197	0.8	Serum metabolite levels	23093944	Krumsiek J
ZH38T0001633	TSS	Verified GENCODE TSS	rs35197169	rs11206397	0.73	Blood protein levels	29875488	Sun BB
ZH38T0001735	TSS	Verified GENCODE TSS	rs4344355	rs1748195	0.85	Crohn's disease	28067908	de Lange KM
ZH38T0001735	TSS	Verified GENCODE TSS	rs4344355	rs1168029	0.73	Lipid metabolism phenotypes	22286219	Kettunen J
ZH38T0001735	TSS	Verified GENCODE TSS	rs4344355	rs10889353,rs1167998	0.89,0.73	Lipid metabolism phenotypes	19936222	Chasman DI
ZH38T0001735	TSS	Verified GENCODE TSS	rs4344355	rs11485618	0.77	LDL cholesterol levels	28334899	Spracklen CN
ZH38T0001735	TSS	Verified GENCODE TSS	rs4344355	rs11208004	0.84	Total cholesterol levels	28334899	Spracklen CN
ZH38T0001735	TSS	Verified GENCODE TSS	rs4344355	rs61775910	0.72	Total cholesterol levels	29403010	Kanai M
ZH38T0001735	TSS	Verified GENCODE TSS	rs4344355	rs1168128,rs7547965	0.8,0.71	Blood protein levels	30072576	Emilsson V
ZH38T0001755	TSS	Verified GENCODE TSS	rs58161194	rs12135035	0.76	Blood protein levels	30072576	Emilsson V
ZH38T0001830	Proximal	Verified unannotated TSS	rs151188803	rs7552964	0.96	Educational attainment (MTAG)	30038396	Lee JJ
ZH38T0001830	Proximal	Verified unannotated TSS	rs151188803	rs2420551	0.78	General cognitive ability	29844566	Davies G
ZH38T0001830	Proximal	Verified unannotated TSS	rs151188803	rs4484967	0.83	Cognitive performance (MTAG)	30038396	Lee JJ
ZH38T0001856	Proximal	Verified unannotated TSS	rs3101339	rs2568958	0.89	Body mass index	23563607	Berndt SI
ZH38T0001856	Proximal	Verified unannotated TSS	rs3101339	rs3101336	0.92	Body mass index	28892062	Akiyama M
ZH38T0001856	Proximal	Verified unannotated TSS	rs3101339	rs11209943	0.92	General cognitive ability	29844566	Davies G
ZH38T0001856	Proximal	Verified unannotated TSS	rs3101339	rs3101336	0.91	Body mass index	26961502	Wood AR
ZH38T0001857	Proximal	TSS unannotated transcript	rs3101339	rs2568958	0.89	Body mass index	23563607	Berndt SI
ZH38T0001857	Proximal	TSS unannotated transcript	rs3101339	rs3101336	0.92	Body mass index	28892062	Akiyama M
ZH38T0001857	Proximal	TSS unannotated transcript	rs3101339	rs11209943	0.92	General cognitive ability	29844566	Davies G
ZH38T0001857	Proximal	TSS unannotated transcript	rs3101339	rs3101336	0.91	Body mass index	26961502	Wood AR
ZH38T0001880	Intron	Verified unannotated TSS	rs7515955	rs11161521,rs7552404	0.76,0.83	Blood metabolite levels	24816252	Shin SY
ZH38T0001880	Intron	Verified unannotated TSS	rs7515955	rs4949874	0.84	Blood metabolite ratios	24816252	Shin SY
ZH38T0001880	Intron	Verified unannotated TSS	rs7515955	rs12134854	0.81	Serum metabolite levels	23093944	Krumsiek J
ZH38T0002120	Proximal	Verified unannotated TSS	rs2297707	rs7526112	0.8	Educational attainment (MTAG)	30038396	Lee JJ
ZH38T0002128	TSS	Verified GENCODE TSS	rs10710832	rs7514579	0.83	Systolic blood pressure	30224653	Evangelou E
ZH38T0002267	TSS	Candidate GENCODE TSS	rs2232015	rs9435340	0.91	Educational attainment (MTAG)	30038396	Lee JJ
ZH38T0002325	Proximal	Verified unannotated TSS	rs2140924	rs2152924	0.77	Cognitive ability (MTAG)	29186694	Lam M
ZH38T0002325	Proximal	Verified unannotated TSS	rs2140924	rs1933182	0.86	Chronic kidney disease	20383146	Kottgen A
ZH38T0002325	Proximal	Verified unannotated TSS	rs2140924	rs680434	0.9	Self-reported math ability	30038396	Lee JJ
ZH38T0002325	Proximal	Verified unannotated TSS	rs2140924	rs407102	0.87	General cognitive ability	29844566	Davies G
ZH38T0002325	Proximal	Verified unannotated TSS	rs2140924	rs6666119	0.71	Cognitive performance (MTAG)	30038396	Lee JJ
ZH38T0002333	TSS	Verified GENCODE TSS	rs3737182	rs6537837	0.94	Major depressive disorder	20125088	Shi J
ZH38T0002365	TSS	Verified GENCODE TSS	rs1494324	rs2885805	0.83	Cytomegalovirus antibody response	21993531	Kuparinen T
ZH38T0002571	TSS	Verified GENCODE TSS	rs562038	rs477992	0.99	Amino acid levels	26068415	Draisma HHM
ZH38T0002571	TSS	Verified GENCODE TSS	rs561931	rs1163251	0.79	Blood metabolite levels	24816252	Shin SY
ZH38T0002578	TSS	Verified GENCODE TSS	rs3216034	Lead	*	Blood protein levels	29875488	Sun BB
ZH38T0002720	TSS	Verified GENCODE TSS	rs1890042	rs2354432	0.76	Mitochondrial DNA levels	25240745	Lopez S
ZH38T0002802	TSS	Verified GENCODE TSS	rs2027349	rs55802315	0.88	Self-reported math ability	30038396	Lee JJ
ZH38T0002803	TSS	Verified GENCODE TSS	rs2027349	rs55802315	0.88	Self-reported math ability	30038396	Lee JJ
ZH38T0002809	Intergenic	TSS unannotated transcript	rs72694957	rs55802315	0.96	Self-reported math ability	30038396	Lee JJ
ZH38T0002837	TSS	Verified GENCODE TSS	rs12724450	Lead	*	Blood protein levels	28240269	Suhre K
ZH38T0002859	TSS	Verified GENCODE TSS	rs3754212	rs1336900	0.72	Blood protein levels	28240269	Suhre K
ZH38T0002944	Proximal	Verified unannotated TSS	rs3811414	rs6664467	0.82	Carotid plaque burden	28282560	Pott J
ZH38T0003011	TSS	Verified GENCODE TSS	rs1750309	rs4363385	0.71	Inflammatory skin disease	25574825	Baurecht H
ZH38T0003039	TSS	Verified GENCODE TSS	rs11488669	rs58056804	0.94	Blood protein levels	29875488	Sun BB
ZH38T0003092	TSS	Verified GENCODE TSS	rs6661009	rs11264736,rs2252508,rs7414227,rs9426935	1,0.89,0.81,0.7	Lentiform nucleus volume	22903471	Hibar DP
ZH38T0003092	TSS	Verified GENCODE TSS	rs6661009	rs4845586	0.95	Blood protein levels	29875488	Sun BB
ZH38T0003092	TSS	Verified GENCODE TSS	rs6661009	rs4845360	0.83	Blood protein levels	30072576	Emilsson V
ZH38T0003120	TSS	Verified GENCODE TSS	rs11265425	rs4620534	0.7	Mean corpuscular volume	29403010	Kanai M
ZH38T0003128	Intron	Verified unannotated TSS	rs7518199	rs4129267	0.87	C-reactive protein levels	21300955	Dehghan A
ZH38T0003128	Intron	Verified unannotated TSS	rs7518199	rs61812598	0.87	Fibrinogen levels	26561523	de Vries PS
ZH38T0003128	Intron	Verified unannotated TSS	rs7518199	rs61812598	0.87	Fibrinogen levels	28107422	de Vries PS
ZH38T0003128	Intron	Verified unannotated TSS	rs7518199	rs12133641	0.84	Abdominal aortic aneurysm	27899403	Jones GT
ZH38T0003128	Intron	Verified unannotated TSS	rs7518199	rs12133641	0.84	Mosquito bite size	28199695	Jones AV
ZH38T0003128	Intron	Verified unannotated TSS	rs7518199	rs11265613,rs4129267	0.95,0.87	Blood protein levels	28240269	Suhre K
ZH38T0003128	Intron	Verified unannotated TSS	rs7518199	rs4129267	0.87	Blood protein levels	29875488	Sun BB
ZH38T0003128	Intron	Verified unannotated TSS	rs7518199	rs12133641	0.81	C-reactive protein levels	29403010	Kanai M
ZH38T0003128	Intron	Verified unannotated TSS	rs7518199	rs2228145	0.86	Blood protein levels	30072576	Emilsson V
ZH38T0003183	TSS	Verified GENCODE TSS	rs11264333	rs11264327	0.83	Urinary albumin excretion	30220432	Haas ME
ZH38T0003198	Proximal	Candidate GENCODE TSS	rs12411216	rs4072037	0.91	Non-cardia gastric cancer	26701879	Wang Z
ZH38T0003198	Proximal	Candidate GENCODE TSS	rs12411216	rs4072037,rs914615	0.94,0.98	Urinary albumin-to-creatinine ratio	26631737	Teumer A
ZH38T0003206	TSS	Verified GENCODE TSS	rs2974929	rs4072037,rs914615	0.83,0.9	Urinary albumin-to-creatinine ratio	26631737	Teumer A
ZH38T0003206	TSS	Verified GENCODE TSS	rs2974929	rs2990246	0.79	Glomerular filtration rate	29403010	Kanai M
ZH38T0003208	Proximal	Verified unannotated TSS	rs2990246	Lead	*	Glomerular filtration rate	29403010	Kanai M
ZH38T0003240	TSS	Verified GENCODE TSS	rs2666826	rs490608	0.73	Inflammatory bowel disease	26192919	Liu JZ
ZH38T0003319	TSS	Verified GENCODE TSS	rs139949895	rs6684514	0.86	Glycated hemoglobin levels	24647736	Chen P
ZH38T0003319	TSS	Verified GENCODE TSS	rs139949895	rs6684514	0.86	Glycated hemoglobin levels	29170429	Hachiya T
ZH38T0003319	TSS	Verified GENCODE TSS	rs139949895	rs2273833	0.83	Hemoglobin A1c levels	29403010	Kanai M
ZH38T0003351	TSS	Verified GENCODE TSS	rs3806415	rs12145743	0.98	HDL cholesterol levels	28334899	Spracklen CN
ZH38T0003351	TSS	Verified GENCODE TSS	rs3806415	rs4399146	0.94	Blood protein levels	30072576	Emilsson V
ZH38T0003374	Intron	Verified unannotated TSS	rs11264581	Lead	*	Blood protein levels	30072576	Emilsson V
ZH38T0003421	TSS	Verified GENCODE TSS	rs28383571	rs12079353	0.93	Blood protein levels	28240269	Suhre K
ZH38T0003421	TSS	Verified GENCODE TSS	rs28383571	rs71632673	0.79	Blood protein levels	29875488	Sun BB
ZH38T0003421	TSS	Verified GENCODE TSS	rs28383571	rs71628140	0.87	Blood protein levels	30072576	Emilsson V
ZH38T0003493	TSS	Verified unannotated TSS	rs2295613	rs11265461	0.71	Schizophrenia (treatment resistant)	22479419	Liou YJ
ZH38T0003582	Intron	Local transcription	rs11585450	rs1875763	0.86	Non-albumin protein levels	29403010	Kanai M
ZH38T0003583	Intron	Verified unannotated TSS	rs1875763	Lead	*	Non-albumin protein levels	29403010	Kanai M
ZH38T0003646	TSS	Verified GENCODE TSS	rs2251768	rs7555523	1	Intraocular pressure	22570627	van Koolwijk LM
ZH38T0003646	TSS	Verified GENCODE TSS	rs2251768	rs4656461	0.97	Glaucoma (primary open-angle)	25173105	Gharahkhani P
ZH38T0003687	TSS	Verified GENCODE TSS	rs1933114	rs4656599	0.7	Blood protein levels	29875488	Sun BB
ZH38T0003689	TSS	Verified GENCODE TSS	rs1052591	rs1018454	0.78	Blood protein levels	29875488	Sun BB
ZH38T0003689	TSS	Verified GENCODE TSS	rs1052591	rs1018454	0.78	Blood protein levels	30072576	Emilsson V
ZH38T0003741	Proximal	Verified unannotated TSS	rs10912675	rs6660565	0.84	Sudden cardiac arrest	21658281	Aouizerat BE
ZH38T0003763	TSS	Verified GENCODE TSS	rs2294718	rs6689125	0.95	Platelet distribution width	27863252	Astle WJ
ZH38T0003764	TSS	Verified GENCODE TSS	rs114247451	rs3817923	0.97	Educational attainment (MTAG)	30038396	Lee JJ
ZH38T0003792	Proximal	Verified unannotated TSS	rs10798295	rs5877	0.74	Subjective well-being (MTAG)	29292387	Turley P
ZH38T0003810	Intron	Verified unannotated TSS	rs2179214	rs7512930	0.92	General cognitive ability	29844566	Davies G
ZH38T0003810	Intron	Verified unannotated TSS	rs2179214	rs2049992	0.97	Cognitive performance (MTAG)	30038396	Lee JJ
ZH38T0003958	Intron	Verified unannotated TSS	rs681054	rs527825	0.89	General cognitive ability	29844566	Davies G
ZH38T0003961	Intron	Local transcription	rs2275675	rs2794619	0.94	General cognitive ability	29844566	Davies G
ZH38T0003962	Proximal	Verified unannotated TSS	rs41272536	rs17849501	0.82	Systemic lupus erythematosus	26502338	Bentham J
ZH38T0003973	TSS	Verified GENCODE TSS	rs112313734	rs10911390	0.95	Systemic lupus erythematosus	23273568	Yang W
ZH38T0003974	TSS	Verified GENCODE TSS	rs114491252	rs10911390	0.95	Systemic lupus erythematosus	23273568	Yang W
ZH38T0003977	TSS	Verified GENCODE TSS	rs6699011	rs10911390	1	Systemic lupus erythematosus	23273568	Yang W
ZH38T0003977	TSS	Verified GENCODE TSS	rs6699033	rs10911390	1	Systemic lupus erythematosus	23273568	Yang W
ZH38T0004073	TSS	Verified GENCODE TSS	rs148212596	Lead	*	Blood protein levels	29875488	Sun BB
ZH38T0004260	Proximal	Verified unannotated TSS	rs7515776	rs10399805	0.9	Blood protein levels	29875488	Sun BB
ZH38T0004282	TSS	Verified GENCODE TSS	rs4971252	rs4971253	0.97	Blood protein levels	30072576	Emilsson V
ZH38T0004341	Intergenic	TSS unannotated transcript	rs35270244	rs4245739	0.72	Systolic blood pressure	27618452	Ehret GB
ZH38T0004341	Intergenic	TSS unannotated transcript	rs35270244	rs4245739	0.72	Diastolic blood pressure	27618452	Ehret GB
ZH38T0004384	TSS	Verified GENCODE TSS	rs823144	rs6679073	0.95	Prostate-specific antigen levels	25434496	Kim S
ZH38T0004384	TSS	Verified GENCODE TSS	rs823144	rs823114	0.93	Body mass index	28892062	Akiyama M
ZH38T0004414	Proximal	Verified unannotated TSS	rs3024493	rs3024505	0.98	Crohn's disease	28067908	de Lange KM
ZH38T0004414	Proximal	Verified unannotated TSS	rs3024493	rs3024505	0.98	Ulcerative colitis	28067908	de Lange KM
ZH38T0004414	Proximal	Verified unannotated TSS	rs3024493	rs3024505	0.98	Type 1 diabetes	19430480	Barrett JC
ZH38T0004414	Proximal	Verified unannotated TSS	rs3024493	Lead,rs3024505	*,0.98	Systemic lupus erythematosus	26502338	Bentham J
ZH38T0004414	Proximal	Verified unannotated TSS	rs3024493	Lead	*	Inflammatory bowel disease	26192919	Liu JZ
ZH38T0004414	Proximal	Verified unannotated TSS	rs3024493	rs3024505	0.98	Inflammatory bowel disease	23128233	Jostins L
ZH38T0004414	Proximal	Verified unannotated TSS	rs3024493	rs3024505	0.98	Systemic lupus erythematosus	19838195	Gateva V
ZH38T0004414	Proximal	Verified unannotated TSS	rs3024493	rs3024505	0.98	Type 1 diabetes	21829393	Plagnol V
ZH38T0004414	Proximal	Verified unannotated TSS	rs3024493	rs3024505	0.98	Inflammatory bowel disease	28008999	Ostrowski J
ZH38T0004414	Proximal	Verified unannotated TSS	rs3024493	rs3024505	0.98	Type 1 diabetes	25751624	Onengut-Gumuscu S
ZH38T0004423	Intergenic	TSS unannotated transcript	rs1400987	rs2007272	0.85	Blood protein levels	29875488	Sun BB
ZH38T0004423	Intergenic	TSS unannotated transcript	rs1400987	rs2007272	0.85	Blood protein levels	30072576	Emilsson V
ZH38T0004568	Intron	Verified unannotated TSS	rs340879	rs2075423	0.85	Type 2 diabetes	22885922	Morris AP
ZH38T0004568	Intron	Verified unannotated TSS	rs340879	rs340874	0.77	Fasting blood glucose	20081858	Dupuis J
ZH38T0004568	Intron	Verified unannotated TSS	rs340879	rs340874	0.77	Fasting blood glucose	22581228	Manning AK
ZH38T0004572	TSS	Verified GENCODE TSS	rs340839	rs340874	0.75	Fasting blood glucose	20081858	Dupuis J
ZH38T0004572	TSS	Verified GENCODE TSS	rs340839	rs340874	0.75	Fasting blood glucose	22581228	Manning AK
ZH38T0004573	TSS	Verified unannotated TSS	rs340839	rs340874	0.75	Fasting blood glucose	20081858	Dupuis J
ZH38T0004573	TSS	Verified unannotated TSS	rs340839	rs340874	0.75	Fasting blood glucose	22581228	Manning AK
ZH38T0004859	TSS	Verified GENCODE TSS	rs5051	rs2493134	0.93	Systolic blood pressure	27618452	Ehret GB
ZH38T0004859	TSS	Verified GENCODE TSS	rs5051	rs2493134	0.93	Diastolic blood pressure	27618452	Ehret GB
ZH38T0004859	TSS	Verified GENCODE TSS	rs5049	rs3789678	0.97	Blood protein levels	30072576	Emilsson V
ZH38T0005006	TSS	Verified GENCODE TSS	rs3904682	rs28599724	0.76	Self-reported math ability	30038396	Lee JJ
ZH38T0005205	TSS	Verified GENCODE TSS	rs7477466	rs11253170	0.78	General cognitive ability	29844566	Davies G
ZH38T0005208	TSS	Verified GENCODE TSS	rs7090012	rs11253170	0.7	General cognitive ability	29844566	Davies G
ZH38T0005226	TSS	Verified GENCODE TSS	rs3736461	rs2890364	0.74	Blood protein levels	30072576	Emilsson V
ZH38T0005226	TSS	Verified GENCODE TSS	rs3736460	rs56352451	0.79	Systolic blood pressure	30224653	Evangelou E
ZH38T0005232	Proximal	Verified unannotated TSS	rs4749859	rs8177656	0.95	Blood protein levels	29875488	Sun BB
ZH38T0005239	Intergenic	TSS unannotated transcript	rs3750672	rs10905875	0.78	Selective IgA deficiency	27723758	Bronson PG
ZH38T0005275	TSS	TSS unannotated transcript	rs2275806	Lead	*	Rheumatoid arthritis (ACPA-positive)	23143596	Eyre S
ZH38T0005324	TSS	Verified GENCODE TSS	rs7475265	rs10752262	0.84	Educational attainment (MTAG)	30038396	Lee JJ
ZH38T0005336	TSS	Verified GENCODE TSS	rs2399954	rs2093847	0.98	Blood protein levels	29875488	Sun BB
ZH38T0005428	TSS	Verified GENCODE TSS	rs2357928	rs1277723	0.76	Body mass index	28892062	Akiyama M
ZH38T0005664	TSS	Verified GENCODE TSS	rs11597888	rs2370759	1	Sexual dysfunction (female)	22509378	Burri A
ZH38T0005664	TSS	Verified GENCODE TSS	rs11597888	rs76164690	0.75	Diastolic blood pressure	30224653	Evangelou E
ZH38T0005691	Intron	Verified unannotated TSS	rs11009175	Lead	*	Depression (quantitative trait)	20800221	Terracciano A
ZH38T0005709	TSS	Verified GENCODE TSS	rs4934730	rs34779708	0.98	Crohn's disease	28067908	de Lange KM
ZH38T0005709	TSS	Verified GENCODE TSS	rs4934730	rs11010067,rs34779708	0.88,0.98	Inflammatory bowel disease	26192919	Liu JZ
ZH38T0005709	TSS	Verified GENCODE TSS	rs4934730	rs11010067	0.88	Inflammatory bowel disease	23128233	Jostins L
ZH38T0005794	Intron	Verified unannotated TSS	rs71496621	rs2279434	0.88	Mean corpuscular hemoglobin	20139978	Kamatani Y
ZH38T0005794	Intron	Verified unannotated TSS	rs75820736	rs2279434	0.88	Mean corpuscular hemoglobin	20139978	Kamatani Y
ZH38T0005794	Intron	Verified unannotated TSS	rs71496621	rs2279434	0.88	Mean corpuscular volume	20139978	Kamatani Y
ZH38T0005794	Intron	Verified unannotated TSS	rs75820736	rs2279434	0.88	Mean corpuscular volume	20139978	Kamatani Y
ZH38T0005794	Intron	Verified unannotated TSS	rs7086046	rs2291429	0.88	Blood metabolite levels	24816252	Shin SY
ZH38T0005794	Intron	Verified unannotated TSS	rs71496621	rs35993099	0.98	Mean corpuscular hemoglobin	27863252	Astle WJ
ZH38T0005794	Intron	Verified unannotated TSS	rs75820736	rs35993099	0.98	Mean corpuscular hemoglobin	27863252	Astle WJ
ZH38T0005794	Intron	Verified unannotated TSS	rs7086046	rs970548	1	HDL cholesterol levels	28334899	Spracklen CN
ZH38T0005794	Intron	Verified unannotated TSS	rs7086046	rs970548	1	Total cholesterol levels	28334899	Spracklen CN
ZH38T0005794	Intron	Verified unannotated TSS	rs71496621	rs34897497	1	Mean corpuscular volume	27863252	Astle WJ
ZH38T0005794	Intron	Verified unannotated TSS	rs75820736	rs34897497	1	Mean corpuscular volume	27863252	Astle WJ
ZH38T0005794	Intron	Verified unannotated TSS	rs71496621	rs75085022	0.88	Mean corpuscular volume	29403010	Kanai M
ZH38T0005794	Intron	Verified unannotated TSS	rs75820736	rs75085022	0.88	Mean corpuscular volume	29403010	Kanai M
ZH38T0005794	Intron	Verified unannotated TSS	rs71496621	rs17157825	0.85	Mean corpuscular hemoglobin	29403010	Kanai M
ZH38T0005794	Intron	Verified unannotated TSS	rs75820736	rs17157825	0.85	Mean corpuscular hemoglobin	29403010	Kanai M
ZH38T0005807	TSS	Verified GENCODE TSS	rs10993994	Lead	*	Prostate-specific antigen levels	23269536	Sun J
ZH38T0005807	TSS	Verified GENCODE TSS	rs10993994	Lead	*	PCA3 expression level	23555189	Chen Z
ZH38T0005807	TSS	Verified GENCODE TSS	rs10993994	rs4631830	0.96	Prostate-specific antigen levels	25434496	Kim S
ZH38T0005807	TSS	Verified GENCODE TSS	rs10993994	Lead	*	Prostate-specific antigen levels	28139693	Hoffmann TJ
ZH38T0005807	TSS	Verified GENCODE TSS	rs10993994	Lead	*	Blood protein levels	29875488	Sun BB
ZH38T0005807	TSS	Verified GENCODE TSS	rs10993994	rs11006489	0.71	Blood protein levels	30072576	Emilsson V
ZH38T0005894	TSS	Verified GENCODE TSS	rs45602536	rs1800451	0.91	Blood protein levels	29875488	Sun BB
ZH38T0005913	TSS	Verified GENCODE TSS	rs2251039	rs2153283	0.92	Inflammatory bowel disease	26192919	Liu JZ
ZH38T0005913	TSS	Verified GENCODE TSS	rs2251039	rs2790216	0.97	Inflammatory bowel disease	23128233	Jostins L
ZH38T0005916	Intron	Verified unannotated TSS	rs2790189	rs2153283	0.9	Inflammatory bowel disease	26192919	Liu JZ
ZH38T0005916	Intron	Verified unannotated TSS	rs2790189	rs2790216	0.95	Inflammatory bowel disease	23128233	Jostins L
ZH38T0006005	TSS	Verified GENCODE TSS	rs2273772	rs12415800	1	Major depressive disorder	29495898	Peterson RE
ZH38T0006007	TSS	Verified unannotated TSS	rs75818614	rs12415800	1	Major depressive disorder	29495898	Peterson RE
ZH38T0006082	TSS	Verified GENCODE TSS	rs7077538	rs10823500	0.81	Blood protein levels	28240269	Suhre K
ZH38T0006196	Proximal	Candidate GENCODE TSS	rs3812637	rs11000785	0.99	Educational attainment (MTAG)	30038396	Lee JJ
ZH38T0006433	Proximal	Verified unannotated TSS	rs1800682	Lead	*	Chronic lymphocytic leukemia	24292274	Speedy HE
ZH38T0006433	Proximal	Verified unannotated TSS	rs1800682	rs6586163	0.85	Chronic lymphocytic leukemia	28165464	Law PJ
ZH38T0006433	Proximal	Verified unannotated TSS	rs2234768	rs9658691	0.97	Mosquito bite size	28199695	Jones AV
ZH38T0006441	TSS	Verified GENCODE TSS	rs1332327	rs1412444	0.8	Coronary heart disease	21606135	Wild PS
ZH38T0006441	TSS	Verified GENCODE TSS	rs1332327	rs2250644	0.8	Fibrinogen levels	26561523	de Vries PS
ZH38T0006519	TSS	Verified GENCODE TSS	rs10882283	rs36014035	0.84	Blood protein levels	30072576	Emilsson V
ZH38T0006546	TSS	Verified GENCODE TSS	rs4986894	rs12767583	0.96	Acenocoumarol maintenance dosage	19578179	Teichert M
ZH38T0006546	TSS	Verified GENCODE TSS	rs4986894	Lead	*	Blood metabolite levels	24816252	Shin SY
ZH38T0006546	TSS	Verified GENCODE TSS	rs17885098	rs7896133	0.76	Serum metabolite levels	23093944	Krumsiek J
ZH38T0006628	Intron	Verified unannotated TSS	rs45587331	Lead	*	Alanine transaminase levels	29403010	Kanai M
ZH38T0006679	Intergenic	Verified unannotated TSS	rs17111484	rs12570188	0.76	Asthma (childhood onset)	23829686	Ding L
ZH38T0006711	TSS	Verified GENCODE TSS	rs12784396	rs10883451	0.77	Educational attainment (MTAG)	30038396	Lee JJ
ZH38T0006711	TSS	Verified GENCODE TSS	rs12784396	rs1408579,rs61871342	0.76,0.8	General cognitive ability	29844566	Davies G
ZH38T0006711	TSS	Verified GENCODE TSS	rs12784396	rs10883451	0.77	Cognitive performance (MTAG)	30038396	Lee JJ
ZH38T0006796	Intron	Verified unannotated TSS	rs11593146	rs2273555	0.71	Hand grip strength	29313844	Willems SM
ZH38T0006796	Intron	Verified unannotated TSS	rs11597439	rs2273555	0.71	Hand grip strength	29313844	Willems SM
ZH38T0006821	TSS	Verified GENCODE TSS	rs743572	rs9663140	0.78	Creatine kinase levels	29403010	Kanai M
ZH38T0006861	TSS	Verified GENCODE TSS	rs4387287	rs7907606	0.98	Basal cell carcinoma	27539887	Chahal HS
ZH38T0006861	TSS	Verified GENCODE TSS	rs4387287	Lead	*	Diastolic blood pressure	28739976	Wain LV
ZH38T0006861	TSS	Verified GENCODE TSS	rs4387287	rs11813268	0.97	Renal cell carcinoma	28598434	Scelo G
ZH38T0006932	TSS	Verified GENCODE TSS	rs7076609	rs12571549	0.91	Educational attainment (MTAG)	30038396	Lee JJ
ZH38T0006945	TSS	Verified GENCODE TSS	rs111446990	rs111777102	0.82	Diastolic blood pressure	30224653	Evangelou E
ZH38T0006985	Intron	Local transcription	rs4501923	rs11195949	0.99	Self-reported math ability	30038396	Lee JJ
ZH38T0006985	Intron	Local transcription	rs4501923	Lead	*	Cognitive performance (MTAG)	30038396	Lee JJ
ZH38T0007061	Intron	Verified unannotated TSS	rs11197861	rs10886017	0.71	Body mass index	26426971	Winkler TW
ZH38T0007070	Proximal	Verified unannotated TSS	rs860626	rs703410	0.82	Subjective well-being (MTAG)	29292387	Turley P
ZH38T0007189	TSS	Verified GENCODE TSS	rs144443222	rs141185973	0.72	Childhood ear infection	28928442	Tian C
ZH38T0007290	TSS	Verified GENCODE TSS	rs71487219	rs3741411	0.81	Hemoglobin A1c levels	29403010	Kanai M
ZH38T0007295	Intergenic	Verified unannotated TSS	rs73396521	rs17655730	0.92	Mean platelet volume	22139419	Gieger C
ZH38T0007297	Intergenic	Local transcription	rs17655663	rs17655730	0.93	Mean platelet volume	22139419	Gieger C
ZH38T0007297	Intergenic	Local transcription	rs72882960	rs17655730	0.93	Mean platelet volume	22139419	Gieger C
ZH38T0007536	Proximal	Verified unannotated TSS	rs907613	rs907611	1	Ulcerative colitis	28067908	de Lange KM
ZH38T0007536	Proximal	Verified unannotated TSS	rs907613	rs907611	1	Inflammatory bowel disease	26192919	Liu JZ
ZH38T0007536	Proximal	Verified unannotated TSS	rs907613	rs907611	1	Inflammatory bowel disease	23128233	Jostins L
ZH38T0007544	Exon	Verified unannotated TSS	rs4980389	rs569550	0.97	Systolic blood pressure	29403010	Kanai M
ZH38T0007544	Exon	Verified unannotated TSS	rs4980389	Lead	*	Mean arterial pressure	29403010	Kanai M
ZH38T0007580	Intron	Verified unannotated TSS	rs3741204	rs1004446	1	Type 1 diabetes	17632545	Hakonarson H
ZH38T0007580	Intron	Verified unannotated TSS	rs3741204	rs1004446	1	Type 1 diabetes	21829393	Plagnol V
ZH38T0007588	Proximal	Verified unannotated TSS	rs734095	rs16928078	0.99	Mean corpuscular hemoglobin	27863252	Astle WJ
ZH38T0007588	Proximal	Verified unannotated TSS	rs734095	rs1501466	0.71	Mean corpuscular volume	27863252	Astle WJ
ZH38T0007591	Proximal	Verified unannotated TSS	rs55648810	rs16928078	0.96	Mean corpuscular hemoglobin	27863252	Astle WJ
ZH38T0007704	TSS	Verified GENCODE TSS	rs11040999	rs12799172	0.73	Periodontal disease-related phenotypes	24347629	Shaffer JR
ZH38T0007933	Proximal	TSS unannotated transcript	rs214088	rs214099	0.93	Blood protein levels	29875488	Sun BB
ZH38T0007939	Intron	Verified unannotated TSS	rs10535629	rs1557765,rs7928810	0.72,0.89	Body mass index	26426971	Winkler TW
ZH38T0007967	TSS	Verified GENCODE TSS	rs1829575	rs1993373	0.93	Blood protein levels	28240269	Suhre K
ZH38T0007967	TSS	Verified GENCODE TSS	rs2445166	rs183978373	0.83	Blood protein levels	29875488	Sun BB
ZH38T0007973	TSS	Verified GENCODE TSS	rs3802968	rs4150579	0.93	Blood protein levels	28240269	Suhre K
ZH38T0007973	TSS	Verified GENCODE TSS	rs3825025	rs4150579	0.96	Blood protein levels	28240269	Suhre K
ZH38T0007974	Proximal	Verified unannotated TSS	rs3802967	rs2403254	0.97	Blood metabolite levels	24816252	Shin SY
ZH38T0007974	Proximal	Verified unannotated TSS	rs3802967	rs4150581	0.97	Blood metabolite ratios	24816252	Shin SY
ZH38T0007974	Proximal	Verified unannotated TSS	rs3802967	rs2403254	0.97	Serum metabolite levels	23093944	Krumsiek J
ZH38T0007975	TSS	Verified GENCODE TSS	rs3802967	rs2403254	0.97	Blood metabolite levels	24816252	Shin SY
ZH38T0007975	TSS	Verified GENCODE TSS	rs3802967	rs4150581	0.97	Blood metabolite ratios	24816252	Shin SY
ZH38T0007975	TSS	Verified GENCODE TSS	rs3802967	rs2403254	0.97	Serum metabolite levels	23093944	Krumsiek J
ZH38T0008080	TSS	Verified GENCODE TSS	rs4923458	rs16917237	0.85	Body mass index	26426971	Winkler TW
ZH38T0008080	TSS	Verified GENCODE TSS	rs4923458	rs11030104	0.87	Hand grip strength	29691431	Tikkanen E
ZH38T0008080	TSS	Verified GENCODE TSS	rs4923458	rs10767664	0.71	Body mass index	20935630	Speliotes EK
ZH38T0008080	TSS	Verified GENCODE TSS	rs4923458	rs2030323	0.71	Body mass index	23563607	Berndt SI
ZH38T0008080	TSS	Verified GENCODE TSS	rs4923458	rs11030104	0.87	Body mass index	26961502	Wood AR
ZH38T0008103	TSS	Verified GENCODE TSS	rs2295748	rs11031436	0.81	Optic disc area	25631615	Springelkamp H
ZH38T0008151	TSS	Verified GENCODE TSS	rs2273799	Lead	*	Mean corpuscular hemoglobin	27863252	Astle WJ
ZH38T0008151	TSS	Verified GENCODE TSS	rs2273799	Lead	*	Mean corpuscular volume	27863252	Astle WJ
ZH38T0008271	Intron	Verified unannotated TSS	rs148683230	Lead	*	Educational attainment (MTAG)	30038396	Lee JJ
ZH38T0008323	Intron	Verified unannotated TSS	rs10769263	rs7103648	0.88	Diastolic blood pressure	28739976	Wain LV
ZH38T0008323	Intron	Verified unannotated TSS	rs10769263	rs7103648	0.88	Systolic blood pressure	28739976	Wain LV
ZH38T0008323	Intron	Verified unannotated TSS	rs10769263	rs7103648	0.88	Systolic blood pressure	27618452	Ehret GB
ZH38T0008323	Intron	Verified unannotated TSS	rs10769263	rs7103648	0.88	Diastolic blood pressure	27618452	Ehret GB
ZH38T0008326	TSS	Verified GENCODE TSS	rs7948705	rs3824867	0.89	Mean corpuscular hemoglobin	27863252	Astle WJ
ZH38T0008393	Proximal	Candidate GENCODE TSS	rs731384	rs11603020	0.76	Blood protein levels	28240269	Suhre K
ZH38T0008393	Proximal	Candidate GENCODE TSS	rs731384	rs12790196	0.72	Educational attainment (MTAG)	30038396	Lee JJ
ZH38T0008393	Proximal	Candidate GENCODE TSS	rs731384	rs11229075	0.81	Blood protein levels	29875488	Sun BB
ZH38T0008393	Proximal	Candidate GENCODE TSS	rs731384	rs10750866	0.94	General cognitive ability	29844566	Davies G
ZH38T0008393	Proximal	Candidate GENCODE TSS	rs731384	rs10750866	0.94	Cognitive performance (MTAG)	30038396	Lee JJ
ZH38T0008393	Proximal	Candidate GENCODE TSS	rs731384	rs11229080,rs7102271	0.83,0.81	Blood protein levels	30072576	Emilsson V
ZH38T0008518	TSS	Candidate GENCODE TSS	rs3763839	rs11230521	0.7	Blood protein levels	29875488	Sun BB
ZH38T0008568	Intron	Verified unannotated TSS	rs174528	rs4246215	0.73	Crohn's disease	28067908	de Lange KM
ZH38T0008568	Intron	Verified unannotated TSS	rs174528	rs174547	0.83	Total cholesterol levels	29615537	Kulminski AM
ZH38T0008568	Intron	Verified unannotated TSS	rs174528	rs174547	0.83	Resting heart rate	20639392	Eijgelsheim M
ZH38T0008568	Intron	Verified unannotated TSS	rs174528	rs174547	0.83	Lipid metabolism phenotypes	22286219	Kettunen J
ZH38T0008568	Intron	Verified unannotated TSS	rs174528	rs102275	0.85	Phospholipid levels (plasma)	22359512	Demirkan A
ZH38T0008568	Intron	Verified unannotated TSS	rs174528	rs174545,rs174548	0.97,0.91	Delta-6 desaturase activity	26584805	Dorajoo R
ZH38T0008568	Intron	Verified unannotated TSS	rs174528	rs1535	0.81	Inflammatory bowel disease	26192919	Liu JZ
ZH38T0008568	Intron	Verified unannotated TSS	rs174528	rs174570	0.91	Glycated hemoglobin levels	24647736	Chen P
ZH38T0008568	Intron	Verified unannotated TSS	rs174528	rs174535,rs174538,rs174548,rs174550,rs174556,rs174578	0.85,0.73,0.71,0.83,0.7,0.78	Blood metabolite levels	24816252	Shin SY
ZH38T0008568	Intron	Verified unannotated TSS	rs174528	rs174577	0.79	P wave duration	24850809	Verweij N
ZH38T0008568	Intron	Verified unannotated TSS	rs174528	rs174548	0.71	Blood metabolite ratios	24816252	Shin SY
ZH38T0008568	Intron	Verified unannotated TSS	rs174528	rs4246215	0.73	Inflammatory bowel disease	23128233	Jostins L
ZH38T0008568	Intron	Verified unannotated TSS	rs174528	rs174550	0.97	HDL cholesterol levels	28334899	Spracklen CN
ZH38T0008568	Intron	Verified unannotated TSS	rs174528	rs1535,rs174533	0.92,0.96	LDL cholesterol levels	28334899	Spracklen CN
ZH38T0008568	Intron	Verified unannotated TSS	rs174528	rs1535,rs174533	0.92,0.96	Total cholesterol levels	28334899	Spracklen CN
ZH38T0008568	Intron	Verified unannotated TSS	rs174528	rs174547	0.83	Age-related disease endophenotypes	27790247	He L
ZH38T0008568	Intron	Verified unannotated TSS	rs174528	rs174550	0.83	Fasting blood glucose	20081858	Dupuis J
ZH38T0008568	Intron	Verified unannotated TSS	rs174528	rs174550	0.83	Fasting blood glucose	22581228	Manning AK
ZH38T0008568	Intron	Verified unannotated TSS	rs174528	rs97384	0.79	Total cholesterol levels	29403010	Kanai M
ZH38T0008568	Intron	Verified unannotated TSS	rs174528	rs174551	0.88	Alanine transaminase levels	29403010	Kanai M
ZH38T0008568	Intron	Verified unannotated TSS	rs174528	rs174536	0.85	Resting heart rate	29769521	Ramirez J
ZH38T0008568	Intron	Verified unannotated TSS	rs174528	rs174594	0.85	Hemoglobin A1c levels	29403010	Kanai M
ZH38T0008568	Intron	Verified unannotated TSS	rs174528	rs174547,rs174548,rs174583	0.83,0.71,0.75	Serum metabolite levels	23093944	Krumsiek J
ZH38T0008576	TSS	Verified GENCODE TSS	rs174538	rs4246215	0.77	Crohn's disease	28067908	de Lange KM
ZH38T0008576	TSS	Verified GENCODE TSS	rs174538	rs174547	0.86	Total cholesterol levels	29615537	Kulminski AM
ZH38T0008576	TSS	Verified GENCODE TSS	rs174538	rs174547	0.86	Resting heart rate	20639392	Eijgelsheim M
ZH38T0008576	TSS	Verified GENCODE TSS	rs174538	rs174547	0.86	Lipid metabolism phenotypes	22286219	Kettunen J
ZH38T0008576	TSS	Verified GENCODE TSS	rs174538	rs102275	0.82	Phospholipid levels (plasma)	22359512	Demirkan A
ZH38T0008576	TSS	Verified GENCODE TSS	rs174538	rs174545,rs174548	0.98,0.91	Delta-6 desaturase activity	26584805	Dorajoo R
ZH38T0008576	TSS	Verified GENCODE TSS	rs174538	rs1535	0.82	Inflammatory bowel disease	26192919	Liu JZ
ZH38T0008576	TSS	Verified GENCODE TSS	rs174538	rs174570	0.94	Glycated hemoglobin levels	24647736	Chen P
ZH38T0008576	TSS	Verified GENCODE TSS	rs174538	Lead,rs174535,rs174550,rs174578	*,0.85,0.86,0.74	Blood metabolite levels	24816252	Shin SY
ZH38T0008576	TSS	Verified GENCODE TSS	rs174538	rs174577	0.74	P wave duration	24850809	Verweij N
ZH38T0008576	TSS	Verified GENCODE TSS	rs174538	rs4246215	0.77	Inflammatory bowel disease	23128233	Jostins L
ZH38T0008576	TSS	Verified GENCODE TSS	rs174538	rs174550	0.98	HDL cholesterol levels	28334899	Spracklen CN
ZH38T0008576	TSS	Verified GENCODE TSS	rs174538	rs1535,rs174533	0.93,0.97	LDL cholesterol levels	28334899	Spracklen CN
ZH38T0008576	TSS	Verified GENCODE TSS	rs174538	rs1535,rs174533	0.93,0.97	Total cholesterol levels	28334899	Spracklen CN
ZH38T0008576	TSS	Verified GENCODE TSS	rs174538	rs174547	0.86	Age-related disease endophenotypes	27790247	He L
ZH38T0008576	TSS	Verified GENCODE TSS	rs174538	rs174550	0.86	Fasting blood glucose	20081858	Dupuis J
ZH38T0008576	TSS	Verified GENCODE TSS	rs174538	rs174550	0.86	Fasting blood glucose	22581228	Manning AK
ZH38T0008576	TSS	Verified GENCODE TSS	rs174538	rs97384	0.79	Total cholesterol levels	29403010	Kanai M
ZH38T0008576	TSS	Verified GENCODE TSS	rs174538	rs174551	0.88	Alanine transaminase levels	29403010	Kanai M
ZH38T0008576	TSS	Verified GENCODE TSS	rs174538	rs174536	0.86	Resting heart rate	29769521	Ramirez J
ZH38T0008576	TSS	Verified GENCODE TSS	rs174538	rs174594	0.84	Hemoglobin A1c levels	29403010	Kanai M
ZH38T0008576	TSS	Verified GENCODE TSS	rs174538	rs174547,rs174583	0.86,0.71	Serum metabolite levels	23093944	Krumsiek J
ZH38T0008582	Proximal	Verified unannotated TSS	rs968567	Lead	*	Blood metabolite levels	24816252	Shin SY
ZH38T0008628	Proximal	Verified unannotated TSS	rs1061093	rs2509961	0.84	Lung function (FEV1)	28166213	Wain LV
ZH38T0008751	Proximal	Verified unannotated TSS	rs4672	Lead	*	Cognitive performance (MTAG)	30038396	Lee JJ
ZH38T0008753	Proximal	Verified unannotated TSS	rs60031276	rs694739	0.7	Primary biliary cirrhosis	22961000	Liu JZ
ZH38T0008759	Intron	Verified unannotated TSS	rs602534	rs694739	0.72	Primary biliary cirrhosis	22961000	Liu JZ
ZH38T0008783	TSS	Verified GENCODE TSS	rs663743	rs694739	0.8	Primary biliary cirrhosis	22961000	Liu JZ
ZH38T0008783	TSS	Verified GENCODE TSS	rs663743	rs510372	0.73	Primary biliary cholangitis	26394269	Cordell HJ
ZH38T0008783	TSS	Verified GENCODE TSS	rs663743	Lead	*	Primary sclerosing cholangitis	27992413	Ji SG
ZH38T0008783	TSS	Verified GENCODE TSS	rs663743	rs479777	0.98	Non-melanoma skin cancer	29739929	Visconti A
ZH38T0008903	TSS	Verified GENCODE TSS	rs3200401	rs17146964	0.73	Vertical cup-disc ratio	20548946	Ramdas WD
ZH38T0008907	Intron	Verified unannotated TSS	rs71462347	rs35111506	0.84	Educational attainment (MTAG)	30038396	Lee JJ
ZH38T0008915	TSS	Verified GENCODE TSS	rs3814752	rs111669836	0.9	Type 2 diabetes	28566273	Scott RA
ZH38T0008915	TSS	Verified GENCODE TSS	rs3814752	rs34278912	0.99	Rosacea symptom severity	29771307	Aponte JL
ZH38T0008916	TSS	Verified GENCODE TSS	rs2306361	rs2004649	0.71	Mean platelet volume	27863252	Astle WJ
ZH38T0008926	TSS	Verified GENCODE TSS	rs2236682	rs4014195	0.81	Chronic kidney disease	20383146	Kottgen A
ZH38T0008961	TSS	Verified GENCODE TSS	rs147545467	rs3825068	1	Blood protein levels	29875488	Sun BB
ZH38T0009128	TSS	Verified GENCODE TSS	rs55911137	rs80208956	0.71	Major depressive disorder	29317602	Hall LS
ZH38T0009152	TSS	Verified GENCODE TSS	rs4944946	rs3794060	0.89	Systemic lupus erythematosus	26502338	Bentham J
ZH38T0009152	TSS	Verified GENCODE TSS	rs4944946	rs12785878	0.9	Vitamin D insufficiency	20541252	Wang TJ
ZH38T0009152	TSS	Verified GENCODE TSS	rs4944946	rs4423214	0.89	Vitamin D levels	28757204	Manousaki D
ZH38T0009152	TSS	Verified GENCODE TSS	rs4944946	rs12785878	0.9	Vitamin D levels	29343764	Jiang X
ZH38T0009153	TSS	Verified GENCODE TSS	rs28364617	rs3794060	0.92	Systemic lupus erythematosus	26502338	Bentham J
ZH38T0009153	TSS	Verified GENCODE TSS	rs28364617	rs12785878	0.93	Vitamin D insufficiency	20541252	Wang TJ
ZH38T0009153	TSS	Verified GENCODE TSS	rs28364617	rs4423214	0.92	Vitamin D levels	28757204	Manousaki D
ZH38T0009153	TSS	Verified GENCODE TSS	rs28364617	rs12785878	0.93	Vitamin D levels	29343764	Jiang X
ZH38T0009208	TSS	Verified GENCODE TSS	rs7109575	rs1552224	0.94	Type 2 diabetes	22885922	Morris AP
ZH38T0009208	TSS	Verified GENCODE TSS	rs7109575	rs1552224	0.94	Type 2 diabetes	20581827	Voight BF
ZH38T0009208	TSS	Verified GENCODE TSS	rs7109575	rs77106637	0.77	Type 2 diabetes	26818947	Imamura M
ZH38T0009208	TSS	Verified GENCODE TSS	rs7109575	rs11603334	0.94	Fasting blood glucose	22581228	Manning AK
ZH38T0009208	TSS	Verified GENCODE TSS	rs58249351	rs7123876	0.94	Body mass index	28892062	Akiyama M
ZH38T0009208	TSS	Verified GENCODE TSS	rs58249351	rs1277060	0.8	Cognitive performance (MTAG)	30038396	Lee JJ
ZH38T0009208	TSS	Verified GENCODE TSS	rs7109575	rs1552224	0.94	Type 2 diabetes	26961502	Wood AR
ZH38T0009243	TSS	Verified GENCODE TSS	rs1043234	rs11235843	0.71	Hand grip strength	27325353	Matteini AM
ZH38T0009243	TSS	Verified GENCODE TSS	rs3211165	rs11235843	0.71	Hand grip strength	27325353	Matteini AM
ZH38T0009466	TSS	Verified GENCODE TSS	rs11019400	rs55897509	0.87	Blood protein levels	30072576	Emilsson V
ZH38T0009466	TSS	Verified GENCODE TSS	rs11600158	rs55897509	0.87	Blood protein levels	30072576	Emilsson V
ZH38T0009566	TSS	Verified GENCODE TSS	rs11021319	rs644799	0.99	Cognitive ability (MTAG)	29186694	Lam M
ZH38T0009566	TSS	Verified GENCODE TSS	rs11021319	rs488476	0.94	Educational attainment (MTAG)	30038396	Lee JJ
ZH38T0009566	TSS	Verified GENCODE TSS	rs11021319	rs502521,rs523934	0.99,0.77	General cognitive ability	29844566	Davies G
ZH38T0009566	TSS	Verified GENCODE TSS	rs11021319	rs1255223	0.98	Cognitive performance (MTAG)	30038396	Lee JJ
ZH38T0009614	TSS	Verified GENCODE TSS	rs11568819	Lead	*	Blood protein levels	28240269	Suhre K
ZH38T0009614	TSS	Verified GENCODE TSS	rs11568819	Lead	*	Blood protein levels	30072576	Emilsson V
ZH38T0009621	TSS	Verified GENCODE TSS	rs3213460	rs12807063,rs17860967,rs17878931	0.86,0.85,0.93	Blood protein levels	30072576	Emilsson V
ZH38T0009638	Intergenic	Verified unannotated TSS	rs11226348	rs11226319	0.88	Self-reported risk-taking behaviour	30181555	Strawbridge RJ
ZH38T0009638	Intergenic	Verified unannotated TSS	rs11226348	rs11226319	0.88	Self-reported risk-taking behaviour	30271922	Clifton EAD
ZH38T0009702	Proximal	Verified unannotated TSS	rs10651522	rs17536059	0.83	Educational attainment (MTAG)	30038396	Lee JJ
ZH38T0009722	TSS	TSS unannotated transcript	rs2850247	rs7937682	0.82	Primary sclerosing cholangitis	27992413	Ji SG
ZH38T0009722	TSS	TSS unannotated transcript	rs2850247	rs7937682	0.82	Primary sclerosing cholangitis	23603763	Liu JZ
ZH38T0009722	TSS	TSS unannotated transcript	rs2850247	rs12362593	0.82	Diastolic blood pressure	30224653	Evangelou E
ZH38T0009778	TSS	Verified GENCODE TSS	rs7111153	Lead	*	Self-reported math ability	30038396	Lee JJ
ZH38T0009778	TSS	Verified GENCODE TSS	rs7111153	rs2186710	0.85	General cognitive ability	29844566	Davies G
ZH38T0009778	TSS	Verified GENCODE TSS	rs7111153	rs2186710	0.85	Cognitive performance (MTAG)	30038396	Lee JJ
ZH38T0009779	Intron	Local transcription	rs12277922	rs1273044	0.85	Blood protein levels	29875488	Sun BB
ZH38T0009786	Intergenic	Local transcription	rs61904989	rs61904987	0.95	Chronic lymphocytic leukemia	28165464	Law PJ
ZH38T0009829	Intron	Verified unannotated TSS	rs11215034	rs10891700	0.99	Blood protein levels	29875488	Sun BB
ZH38T0009830	Intron	Verified unannotated TSS	rs494754	rs561722	0.98	Inflammatory bowel disease	26192919	Liu JZ
ZH38T0009830	Intron	Verified unannotated TSS	rs7127901	rs10891700	0.99	Blood protein levels	29875488	Sun BB
ZH38T0009833	TSS	Verified GENCODE TSS	rs661946	rs561722	0.92	Inflammatory bowel disease	26192919	Liu JZ
ZH38T0009856	TSS	Verified GENCODE TSS	rs651821	Lead	*	Lipid metabolism phenotypes	22286219	Kettunen J
ZH38T0009856	TSS	Verified GENCODE TSS	rs651821	rs2266788	0.87	Triglycerides-Blood Pressure (TG-BP)	21386085	Kraja AT
ZH38T0009856	TSS	Verified GENCODE TSS	rs651821	Lead,rs662799	*,0.99	HDL cholesterol levels	28334899	Spracklen CN
ZH38T0009856	TSS	Verified GENCODE TSS	rs651821	rs964184	0.77	LDL cholesterol levels	28334899	Spracklen CN
ZH38T0009856	TSS	Verified GENCODE TSS	rs651821	rs964184	0.77	Total cholesterol levels	28334899	Spracklen CN
ZH38T0009856	TSS	Verified GENCODE TSS	rs651821	Lead	*	Mean corpuscular volume	29403010	Kanai M
ZH38T0009859	TSS	Verified GENCODE TSS	rs2849167	rs1729407	0.96	Apolipoprotein A-IV levels	27412012	Lamina C
ZH38T0009867	TSS	Verified GENCODE TSS	rs670	rs12099358	0.76	Blood protein levels	28240269	Suhre K
ZH38T0009867	TSS	Verified GENCODE TSS	rs670	Lead	*	Blood protein levels	29875488	Sun BB
ZH38T0009917	Proximal	Verified unannotated TSS	rs1715429	rs1715460	0.85	Blood protein levels	29875488	Sun BB
ZH38T0010009	Intergenic	TSS unannotated transcript	rs7925390	rs10790313	0.73	Self-reported math ability	30038396	Lee JJ
ZH38T0010157	TSS	Verified GENCODE TSS	rs112771035	rs17135399	0.74	LDL cholesterol levels	28334899	Spracklen CN
ZH38T0010158	Intron	Verified unannotated TSS	rs60648773	rs11220462	0.7	Total cholesterol levels	28334899	Spracklen CN
ZH38T0010158	Intron	Verified unannotated TSS	rs60648773	rs3862628	0.96	Blood protein levels	29875488	Sun BB
ZH38T0010160	Proximal	Verified unannotated TSS	rs10893506	rs7949566	0.8	Mean platelet volume	27863252	Astle WJ
ZH38T0010160	Proximal	Verified unannotated TSS	rs10893506	rs7949566	0.8	Platelet distribution width	27863252	Astle WJ
ZH38T0010169	Proximal	TSS unannotated transcript	rs75523963	rs7927044	1	Asthma (childhood onset)	22560479	Forno E
ZH38T0010371	Intergenic	TSS unannotated transcript	rs4766031	rs12425451	0.78	Narcolepsy with cataplexy	23496005	Luca G
ZH38T0010449	TSS	Verified GENCODE TSS	rs10849448	rs11064157	0.79	Primary biliary cirrhosis	22961000	Liu JZ
ZH38T0010522	TSS	Verified GENCODE TSS	rs2071066	rs2071058	0.84	Blood protein levels	30072576	Emilsson V
ZH38T0010523	TSS	Verified GENCODE TSS	rs3825335	rs2071058	0.85	Blood protein levels	30072576	Emilsson V
ZH38T0010529	TSS	Verified GENCODE TSS	rs2239164	rs2071058	0.73	Blood protein levels	30072576	Emilsson V
ZH38T0010586	Proximal	TSS unannotated transcript	rs61742598	rs58992912	1	Blood protein levels	29875488	Sun BB
ZH38T0010586	Proximal	TSS unannotated transcript	rs61742598	rs12316441	0.84	Lactate dehydrogenase levels	29403010	Kanai M
ZH38T0010598	Intergenic	Verified unannotated TSS	rs752452	rs1419980	0.97	HDL cholesterol levels	28334899	Spracklen CN
ZH38T0010598	Intergenic	Verified unannotated TSS	rs752452	rs917863	0.73	Lactate dehydrogenase levels	29403010	Kanai M
ZH38T0010708	TSS	Verified GENCODE TSS	rs11379994	rs544605	0.95	Blood protein levels	30072576	Emilsson V
ZH38T0010710	Proximal	Verified unannotated TSS	rs1359082	rs7970682	0.81	Blood protein levels	30072576	Emilsson V
ZH38T0010710	Proximal	Verified unannotated TSS	rs1359083	rs7970682	0.93	Blood protein levels	30072576	Emilsson V
ZH38T0010786	TSS	Verified GENCODE TSS	rs34330	Lead	*	Systemic lupus erythematosus	23273568	Yang W
ZH38T0010787	Intergenic	Local transcription	rs77216612	rs34327	0.7	Mean arterial pressure	29403010	Kanai M
ZH38T0010842	TSS	Verified GENCODE TSS	rs1800801	rs2287226	0.89	Hand grip strength	29691431	Tikkanen E
ZH38T0010842	TSS	Verified GENCODE TSS	rs1800801	rs11614333	0.88	Hand grip strength	29313844	Willems SM
ZH38T0010842	TSS	Verified GENCODE TSS	rs1800801	rs1001096	0.9	Blood protein levels	29875488	Sun BB
ZH38T0010842	TSS	Verified GENCODE TSS	rs1800801	rs3887182,rs67482087	0.9,0.91	Blood protein levels	30072576	Emilsson V
ZH38T0010846	Intron	Local transcription	rs2417404	rs11614333	0.72	Hand grip strength	29313844	Willems SM
ZH38T0010847	TSS	Verified GENCODE TSS	rs11056243	rs67482087	0.72	Blood protein levels	30072576	Emilsson V
ZH38T0010847	TSS	Verified GENCODE TSS	rs11056244	rs67482087	0.73	Blood protein levels	30072576	Emilsson V
ZH38T0010859	TSS	Verified GENCODE TSS	rs73057219	rs1117152	0.9	Educational attainment (MTAG)	30038396	Lee JJ
ZH38T0010859	TSS	Verified GENCODE TSS	rs73057219	rs10846167	0.74	General cognitive ability	29844566	Davies G
ZH38T0010925	Intergenic	Verified unannotated TSS	rs7134375	rs11045163	0.93	HDL cholesterol levels	28334899	Spracklen CN
ZH38T0010939	Intron	Verified unannotated TSS	rs57743625	rs4363657	0.98	Blood metabolite levels	25898920	Korostishevsky M
ZH38T0010939	Intron	Verified unannotated TSS	rs57743625	rs12317268,rs1871395	0.83,0.83	Blood metabolite levels	24816252	Shin SY
ZH38T0010939	Intron	Verified unannotated TSS	rs57743625	rs4149081	0.98	Clinical laboratory measurements	27897004	Verma SS
ZH38T0010939	Intron	Verified unannotated TSS	rs57743625	rs4149081	0.98	Serum metabolite levels	23093944	Krumsiek J
ZH38T0010941	TSS	Verified GENCODE TSS	rs183429026	rs144436375	0.73	Blood protein levels	30072576	Emilsson V
ZH38T0010982	Intergenic	TSS unannotated transcript	rs150811371	Lead	*	Mortality in sepsis	27639821	Scherag A
ZH38T0011118	TSS	Verified GENCODE TSS	rs11052033	rs61927245	0.94	Mean platelet volume	27863252	Astle WJ
ZH38T0011230	TSS	Verified GENCODE TSS	rs2074193	Lead	*	Migraine with aura	23793025	Anttila V
ZH38T0011252	Proximal	Verified unannotated TSS	rs2408955	rs12819124	0.75	Glycated hemoglobin levels	28887542	Prins BP
ZH38T0011292	Proximal	TSS unannotated transcript	rs2293446	rs10875914	0.89	General cognitive ability	29844566	Davies G
ZH38T0011340	TSS	Verified GENCODE TSS	rs202066295	rs7487854	0.75	General cognitive ability	29844566	Davies G
ZH38T0011375	TSS	Verified GENCODE TSS	rs61926301	rs4307773	0.81	Educational attainment (MTAG)	30038396	Lee JJ
ZH38T0011377	Proximal	Verified unannotated TSS	rs111941917	rs2731439	0.72	Fibrinogen levels	26561523	de Vries PS
ZH38T0011432	TSS	Verified GENCODE TSS	rs2272482	rs10783487	0.97	Mean corpuscular hemoglobin	27863252	Astle WJ
ZH38T0011432	TSS	Verified GENCODE TSS	rs2272482	rs10783487	0.97	Mean corpuscular volume	27863252	Astle WJ
ZH38T0011433	TSS	Verified GENCODE TSS	rs10876233	rs10783487	0.95	Mean corpuscular hemoglobin	27863252	Astle WJ
ZH38T0011433	TSS	Verified GENCODE TSS	rs10876233	rs10783487	0.95	Mean corpuscular volume	27863252	Astle WJ
ZH38T0011526	TSS	Verified unannotated TSS	rs34628172	rs71455229	0.82	Educational attainment (MTAG)	30038396	Lee JJ
ZH38T0011527	TSS	Verified GENCODE TSS	rs34628172	rs71455229	0.82	Educational attainment (MTAG)	30038396	Lee JJ
ZH38T0011622	TSS	Verified GENCODE TSS	rs4759073	rs17110109	0.95	Educational attainment (MTAG)	30038396	Lee JJ
ZH38T0011725	Proximal	Verified unannotated TSS	rs1131017	Lead	*	Inflammatory skin disease	25574825	Baurecht H
ZH38T0011725	Proximal	Verified unannotated TSS	rs1131017	rs2456973	0.71	Cognitive ability (MTAG)	29186694	Lam M
ZH38T0011725	Proximal	Verified unannotated TSS	rs1131017	rs1701704	0.7	Type 1 diabetes	18198356	Hakonarson H
ZH38T0011725	Proximal	Verified unannotated TSS	rs1131017	rs7312770	0.75	Polycystic ovary syndrome	26416764	Day FR
ZH38T0011725	Proximal	Verified unannotated TSS	rs1131017	rs1701704	0.7	Type 1 diabetes	21829393	Plagnol V
ZH38T0011725	Proximal	Verified unannotated TSS	rs1131017	rs11171739	0.88	Self-reported math ability	30038396	Lee JJ
ZH38T0011725	Proximal	Verified unannotated TSS	rs1131017	Lead	*	Cognitive performance (MTAG)	30038396	Lee JJ
ZH38T0011777	TSS	Verified GENCODE TSS	rs80317430	rs11575234,rs36207871	0.88,0.94	Inflammatory skin disease	25574825	Baurecht H
ZH38T0011777	TSS	Verified GENCODE TSS	rs80317430	rs808919	0.82	Blood protein levels	30072576	Emilsson V
ZH38T0011795	Proximal	Verified unannotated TSS	rs1107479	rs2950390	0.9	Mean platelet volume	22139419	Gieger C
ZH38T0011795	Proximal	Verified unannotated TSS	rs1107479	rs7973618	0.72	Mean platelet volume	27863252	Astle WJ
ZH38T0011795	Proximal	Verified unannotated TSS	rs1107479	rs2950393	0.93	Platelet distribution width	27863252	Astle WJ
ZH38T0011795	Proximal	Verified unannotated TSS	rs1107479	rs7137749	0.73	Diastolic blood pressure	30224653	Evangelou E
ZH38T0011808	TSS	Verified GENCODE TSS	rs3214051	rs2950390	0.75	Mean platelet volume	22139419	Gieger C
ZH38T0011808	TSS	Verified GENCODE TSS	rs3214051	rs2950393	0.73	Platelet distribution width	27863252	Astle WJ
ZH38T0011808	TSS	Verified GENCODE TSS	rs3214051	rs7137749	0.86	Diastolic blood pressure	30224653	Evangelou E
ZH38T0011809	TSS	Verified GENCODE TSS	rs2277339	Lead	*	Mean corpuscular volume	27863252	Astle WJ
ZH38T0011894	TSS	Verified GENCODE TSS	rs10437954	Lead	*	Systolic blood pressure	30224653	Evangelou E
ZH38T0011930	TSS	Verified GENCODE TSS	rs3751327	rs3751331	0.71	Educational attainment (MTAG)	30038396	Lee JJ
ZH38T0011930	TSS	Verified GENCODE TSS	rs3751327	rs4628718	0.76	General cognitive ability	29844566	Davies G
ZH38T0011930	TSS	Verified GENCODE TSS	rs3751327	rs6581157	0.71	Cognitive performance (MTAG)	30038396	Lee JJ
ZH38T0012283	Proximal	Verified unannotated TSS	rs11105310	rs10858881	0.9	Blood protein levels	28240269	Suhre K
ZH38T0012302	TSS	Verified GENCODE TSS	rs2070985	rs55887639	0.73	Blood protein levels	30072576	Emilsson V
ZH38T0012384	TSS	Verified GENCODE TSS	rs7970524	rs2247570	0.74	Blood protein levels	30072576	Emilsson V
ZH38T0012385	TSS	Verified GENCODE TSS	rs7134860	rs2247570	0.74	Blood protein levels	30072576	Emilsson V
ZH38T0012432	Intron	Verified unannotated TSS	rs117151379	rs12296850	0.91	Squamous cell carcinoma	23341777	Dong J
ZH38T0012474	TSS	Verified GENCODE TSS	rs35767	Lead	*	Fasting blood insulin	20081858	Dupuis J
ZH38T0012474	TSS	Verified GENCODE TSS	rs35767	rs35747	0.81	Fasting blood insulin	22581228	Manning AK
ZH38T0012499	TSS	Verified GENCODE TSS	rs703657	rs1165693	0.98	Blood protein levels	29875488	Sun BB
ZH38T0012499	TSS	Verified GENCODE TSS	rs703657	rs2576975	0.99	Blood protein levels	30072576	Emilsson V
ZH38T0012545	TSS	Verified GENCODE TSS	rs11831752	rs6539262	0.97	General cognitive ability	29844566	Davies G
ZH38T0012592	Proximal	Verified unannotated TSS	rs11114041	rs4964273,rs6539457	0.9,0.75	General cognitive ability	29844566	Davies G
ZH38T0012592	Proximal	Verified unannotated TSS	rs11114041	rs4964273	0.9	Cognitive performance (MTAG)	30038396	Lee JJ
ZH38T0012604	Intron	Local transcription	rs987044	rs4964759	0.84	Colorectal adenoma (advanced)	29228715	Hofer P
ZH38T0012604	Intron	Local transcription	rs987044	Lead	*	Mean platelet volume	27863252	Astle WJ
ZH38T0012604	Intron	Local transcription	rs987044	rs6539457	0.73	General cognitive ability	29844566	Davies G
ZH38T0012633	TSS	Verified GENCODE TSS	rs10774774	rs59227481	0.82	Age-related nuclear cataracts	24951543	Liao J
ZH38T0012633	TSS	Verified GENCODE TSS	rs10774775	rs59227481	0.82	Age-related nuclear cataracts	24951543	Liao J
ZH38T0012656	Intron	Verified unannotated TSS	rs7312939	rs7300001	0.86	General cognitive ability	29844566	Davies G
ZH38T0012700	TSS	Verified GENCODE TSS	rs151283114	rs7305242	0.84	Body mass index	28892062	Akiyama M
ZH38T0012730	TSS	Verified GENCODE TSS	rs1859331	rs6489882	0.95	Chronic lymphocytic leukemia	28165464	Law PJ
ZH38T0012730	TSS	Verified GENCODE TSS	rs3815178	rs6489882	0.98	Chronic lymphocytic leukemia	28165464	Law PJ
ZH38T0012730	TSS	Verified GENCODE TSS	rs1859331	rs4767027	0.9	Blood protein levels	29875488	Sun BB
ZH38T0012730	TSS	Verified GENCODE TSS	rs3815178	rs4767027	0.92	Blood protein levels	29875488	Sun BB
ZH38T0012730	TSS	Verified GENCODE TSS	rs1859331	rs11066452	0.92	Blood protein levels	30072576	Emilsson V
ZH38T0012730	TSS	Verified GENCODE TSS	rs3815178	rs11066452	0.94	Blood protein levels	30072576	Emilsson V
ZH38T0012741	TSS	Verified GENCODE TSS	rs2290766	rs729062	0.87	Body mass index	26426971	Winkler TW
ZH38T0012743	TSS	Verified GENCODE TSS	rs11544008	rs729062	0.87	Body mass index	26426971	Winkler TW
ZH38T0012744	TSS	Verified GENCODE TSS	rs61943578	rs729062	0.88	Body mass index	26426971	Winkler TW
ZH38T0012778	Intron	Verified unannotated TSS	rs7972416	rs34344826	0.89	Mean platelet volume	27863252	Astle WJ
ZH38T0012854	Intergenic	TSS unannotated transcript	rs16950065	rs3898618	1	Diastolic blood pressure	30224653	Evangelou E
ZH38T0012854	Intergenic	TSS unannotated transcript	rs76603099	rs3898618	0.98	Diastolic blood pressure	30224653	Evangelou E
ZH38T0012866	TSS	Verified GENCODE TSS	rs12857	rs616157	0.96	Educational attainment (MTAG)	30038396	Lee JJ
ZH38T0012866	TSS	Verified GENCODE TSS	rs580016	rs616157	1	Educational attainment (MTAG)	30038396	Lee JJ
ZH38T0012866	TSS	Verified GENCODE TSS	rs12857	rs17431717	0.93	Cognitive performance (MTAG)	30038396	Lee JJ
ZH38T0012866	TSS	Verified GENCODE TSS	rs580016	rs17431717	0.97	Cognitive performance (MTAG)	30038396	Lee JJ
ZH38T0012920	Intergenic	TSS unannotated transcript	rs12809676	rs7954584	0.7	Mean corpuscular volume	27863252	Astle WJ
ZH38T0012920	Intergenic	TSS unannotated transcript	rs12809676	rs11043280	0.9	Mean platelet volume	27863252	Astle WJ
ZH38T0012970	TSS	Verified GENCODE TSS	rs61955196	rs4275659	1	General cognitive ability	29844566	Davies G
ZH38T0012983	TSS	Verified GENCODE TSS	rs146239222	rs10732573	0.83	Cognitive ability (MTAG)	29186694	Lam M
ZH38T0012983	TSS	Verified GENCODE TSS	rs146239222	rs1790100	0.71	Multiple sclerosis	19525953	De Jager PL
ZH38T0012983	TSS	Verified GENCODE TSS	rs146239222	rs10773002	0.82	Educational attainment (MTAG)	30038396	Lee JJ
ZH38T0012983	TSS	Verified GENCODE TSS	rs146239222	rs4268544	0.74	Self-reported math ability	30038396	Lee JJ
ZH38T0012983	TSS	Verified GENCODE TSS	rs146239222	rs1969355	0.85	Cognitive performance (MTAG)	30038396	Lee JJ
ZH38T0013024	TSS	Verified GENCODE TSS	rs144997959	rs73225423	0.81	Mosquito bite size	28199695	Jones AV
ZH38T0013129	Intron	TSS unannotated transcript	rs11146913	rs4883556	0.73	Self-reported math ability	30038396	Lee JJ
ZH38T0013224	TSS	TSS unannotated transcript	rs9510777	rs3814787	0.97	Blood protein levels	30072576	Emilsson V
ZH38T0013224	TSS	TSS unannotated transcript	rs9510778	rs3814787	0.97	Blood protein levels	30072576	Emilsson V
ZH38T0013469	Proximal	Verified unannotated TSS	rs3812891	rs9549297	0.78	Diastolic blood pressure	30224653	Evangelou E
ZH38T0013591	Intron	Verified unannotated TSS	rs1409435	rs1926447,rs9534288	0.8,0.89	Blood protein levels	28240269	Suhre K
ZH38T0013591	Intron	Verified unannotated TSS	rs1409435	rs1926446,rs1926447	0.8,0.8	Blood protein levels	29875488	Sun BB
ZH38T0013670	TSS	Verified GENCODE TSS	rs1063181	rs12583637	0.96	Diastolic blood pressure	30224653	Evangelou E
ZH38T0013830	Intron	TSS unannotated transcript	rs6562772	rs1028883	0.88	Lean body mass	28724990	Zillikens MC
ZH38T0013835	Intergenic	Verified unannotated TSS	rs12428827	rs12429889	1	Sudden cardiac arrest	21658281	Aouizerat BE
ZH38T0013856	TSS	Verified GENCODE TSS	rs7997101	rs539514	0.81	Type 1 diabetes	21980299	Bradfield JP
ZH38T0013941	Intron	TSS unannotated transcript	rs173141	rs342706	0.89	Blood protein levels	28240269	Suhre K
ZH38T0013941	Intron	TSS unannotated transcript	rs342672	rs342706	0.88	Blood protein levels	28240269	Suhre K
ZH38T0013941	Intron	TSS unannotated transcript	rs173141	rs342702	0.87	Blood protein levels	29875488	Sun BB
ZH38T0013941	Intron	TSS unannotated transcript	rs342672	rs342702	0.87	Blood protein levels	29875488	Sun BB
ZH38T0013941	Intron	TSS unannotated transcript	rs173141	rs342702	0.87	Blood protein levels	30072576	Emilsson V
ZH38T0013941	Intron	TSS unannotated transcript	rs342672	rs342702	0.87	Blood protein levels	30072576	Emilsson V
ZH38T0013954	Intergenic	Verified unannotated TSS	rs138607548	rs9561570	0.98	Low tan response	29739929	Visconti A
ZH38T0013955	Intergenic	TSS unannotated transcript	rs9556391	rs9561570	0.84	Low tan response	29739929	Visconti A
ZH38T0013956	Intergenic	Verified unannotated TSS	rs9556391	rs9561570	0.84	Low tan response	29739929	Visconti A
ZH38T0014036	Proximal	Local transcription	rs2791683	rs9300612	0.84	Educational attainment (MTAG)	30038396	Lee JJ
ZH38T0014096	Intron	Verified unannotated TSS	rs9559410	rs9521017	0.92	Mean corpuscular hemoglobin	27863252	Astle WJ
ZH38T0014096	Intron	Verified unannotated TSS	rs9559410	rs9521017	0.92	Mean corpuscular volume	27863252	Astle WJ
ZH38T0014116	TSS	Verified GENCODE TSS	rs7989823	Lead	*	Diastolic blood pressure	28135244	Warren HR
ZH38T0014188	Intron	Verified unannotated TSS	rs9577407	rs9549328	0.83	Systolic blood pressure	28135244	Warren HR
ZH38T0014195	Proximal	Verified unannotated TSS	rs776906	rs776905	0.72	Blood protein levels	28240269	Suhre K
ZH38T0014292	Proximal	TSS unannotated transcript	rs28589501	rs17114671	1	Blood protein levels	28240269	Suhre K
ZH38T0014294	TSS	Verified GENCODE TSS	rs4982325	rs17114671	0.99	Blood protein levels	28240269	Suhre K
ZH38T0014383	TSS	Verified GENCODE TSS	rs1951119	rs8005677	1	Cognitive ability (MTAG)	29186694	Lam M
ZH38T0014383	TSS	Verified GENCODE TSS	rs2295683	rs8005677	1	Cognitive ability (MTAG)	29186694	Lam M
ZH38T0014383	TSS	Verified GENCODE TSS	rs1951119	rs11157930	0.97	Educational attainment (MTAG)	30038396	Lee JJ
ZH38T0014383	TSS	Verified GENCODE TSS	rs2295683	rs11157930	0.97	Educational attainment (MTAG)	30038396	Lee JJ
ZH38T0014383	TSS	Verified GENCODE TSS	rs1951119	rs11157930	0.97	Cognitive performance (MTAG)	30038396	Lee JJ
ZH38T0014383	TSS	Verified GENCODE TSS	rs2295683	rs11157930	0.97	Cognitive performance (MTAG)	30038396	Lee JJ
ZH38T0014392	TSS	Verified GENCODE TSS	rs3811183	rs8005677	0.81	Cognitive ability (MTAG)	29186694	Lam M
ZH38T0014392	TSS	Verified GENCODE TSS	rs3811183	rs11157930	0.84	Educational attainment (MTAG)	30038396	Lee JJ
ZH38T0014392	TSS	Verified GENCODE TSS	rs3811183	rs11157930	0.84	Cognitive performance (MTAG)	30038396	Lee JJ
ZH38T0014514	TSS	Verified GENCODE TSS	rs28372734	rs117531891	0.98	Mean corpuscular volume	29403010	Kanai M
ZH38T0014547	TSS	Verified GENCODE TSS	rs2273844	rs8192917	1	Blood protein levels	29875488	Sun BB
ZH38T0014547	TSS	Verified GENCODE TSS	rs2273844	Lead,rs11539752	*,1	Blood protein levels	30072576	Emilsson V
ZH38T0014695	TSS	Verified GENCODE TSS	rs11558802	rs4900716	0.93	Educational attainment (MTAG)	30038396	Lee JJ
ZH38T0014695	TSS	Verified GENCODE TSS	rs2899849	rs4900716	0.93	Educational attainment (MTAG)	30038396	Lee JJ
ZH38T0014695	TSS	Verified GENCODE TSS	rs3168891	rs4900716	0.91	Educational attainment (MTAG)	30038396	Lee JJ
ZH38T0014701	Proximal	Verified unannotated TSS	rs56249733	rs1951167	0.91	General cognitive ability	29844566	Davies G
ZH38T0014729	TSS	Verified unannotated TSS	rs2277458	Lead	*	Vitamin D levels	28757204	Manousaki D
ZH38T0014729	TSS	Verified unannotated TSS	rs2277458	rs8018720	0.94	Vitamin D levels	29343764	Jiang X
ZH38T0014730	TSS	Verified GENCODE TSS	rs2277458	Lead	*	Vitamin D levels	28757204	Manousaki D
ZH38T0014730	TSS	Verified GENCODE TSS	rs2277458	rs8018720	0.94	Vitamin D levels	29343764	Jiang X
ZH38T0014732	TSS	Verified GENCODE TSS	rs1061583	rs8009933	0.7	Educational attainment (MTAG)	30038396	Lee JJ
ZH38T0014784	Intron	Verified unannotated TSS	rs4900780	rs1160351	0.96	Sexual dysfunction (SSRI/SNRI-related)	22445761	Kurose K
ZH38T0014934	TSS	Verified GENCODE TSS	rs11547116	rs2274273	0.7	Protein biomarker	23056639	de Boer RA
ZH38T0014936	TSS	Verified GENCODE TSS	rs7146752	rs2274273	0.7	Protein biomarker	23056639	de Boer RA
ZH38T0014937	TSS	Candidate GENCODE TSS	rs117960693	rs35070799	0.83	Blood protein levels	28240269	Suhre K
ZH38T0014937	TSS	Candidate GENCODE TSS	rs117960693	rs80226907	0.88	Mean platelet volume	27863252	Astle WJ
ZH38T0014937	TSS	Candidate GENCODE TSS	rs117960693	rs76426991	0.78	Blood protein levels	30072576	Emilsson V
ZH38T0014956	TSS	Verified GENCODE TSS	rs61997667	Lead	*	Educational attainment (MTAG)	30038396	Lee JJ
ZH38T0014976	Intron	Verified unannotated TSS	rs10137475	rs1051860	0.88	Educational attainment (MTAG)	30038396	Lee JJ
ZH38T0015103	Proximal	TSS unannotated transcript	rs2898820	rs4899178,rs6573611	0.75,0.78	Blood protein levels	29875488	Sun BB
ZH38T0015154	Proximal	Verified unannotated TSS	rs1051533	rs57786342	0.72	Diastolic blood pressure	30224653	Evangelou E
ZH38T0015195	TSS	Verified unannotated TSS	rs61980566	rs749396	0.83	Blood protein levels	30072576	Emilsson V
ZH38T0015284	Intron	Verified unannotated TSS	rs73301475	rs17094448	0.96	Blood protein levels	28240269	Suhre K
ZH38T0015284	Intron	Verified unannotated TSS	rs73301475	rs57731447	0.92	Blood protein levels	29875488	Sun BB
ZH38T0015284	Intron	Verified unannotated TSS	rs73301475	rs17094448	0.96	Blood protein levels	30072576	Emilsson V
ZH38T0015285	TSS	Verified GENCODE TSS	rs113908274	rs17094448	0.82	Blood protein levels	28240269	Suhre K
ZH38T0015285	TSS	Verified GENCODE TSS	rs113908274	rs57731447	0.86	Blood protein levels	29875488	Sun BB
ZH38T0015285	TSS	Verified GENCODE TSS	rs113908274	rs17094448	0.82	Blood protein levels	30072576	Emilsson V
ZH38T0015311	TSS	Verified GENCODE TSS	rs175498	rs175484	0.83	Blood protein levels	30072576	Emilsson V
ZH38T0015401	TSS	Verified GENCODE TSS	rs56711325	rs4899737	0.9	Educational attainment (MTAG)	30038396	Lee JJ
ZH38T0015479	Proximal	Local transcription	rs1287663	rs11845781	0.88	Educational attainment (MTAG)	30038396	Lee JJ
ZH38T0015612	Intron	Verified unannotated TSS	rs60189618	Lead	*	Blood protein levels	29875488	Sun BB
ZH38T0015612	Intron	Verified unannotated TSS	rs78913970	rs73338697	0.71	Blood protein levels	29875488	Sun BB
ZH38T0015613	TSS	Verified GENCODE TSS	rs882732	Lead	*	Blood protein levels	28240269	Suhre K
ZH38T0015613	TSS	Verified GENCODE TSS	rs882732	rs10139745	0.87	Blood protein levels	29875488	Sun BB
ZH38T0015613	TSS	Verified GENCODE TSS	rs882732	rs10146582,rs10149354	0.87,0.87	Blood protein levels	30072576	Emilsson V
ZH38T0015698	TSS	Verified GENCODE TSS	rs7143006	rs941923	0.79	Blood protein levels	30072576	Emilsson V
ZH38T0015699	TSS	Verified GENCODE TSS	rs2273804	rs941923	0.86	Blood protein levels	30072576	Emilsson V
ZH38T0015784	TSS	Verified GENCODE TSS	rs1051750	rs12432676	0.75	Non-albumin protein levels	29403010	Kanai M
ZH38T0015843	Proximal	Verified unannotated TSS	rs80097179	rs2498796	0.79	Endometrial endometrioid carcinoma	27135401	Cheng TH
ZH38T0015929	TSS	Verified GENCODE TSS	rs2073679	rs34761731,rs4511431	0.73,0.71	Blood protein levels	29875488	Sun BB
ZH38T0015979	TSS	Verified GENCODE TSS	rs10220412	rs10139058,rs11845244,rs2073668,rs3814922,rs8004835	0.7,0.71,0.71,0.84,0.7	Blood protein levels	29875488	Sun BB
ZH38T0015979	TSS	Verified GENCODE TSS	rs4448834	rs4259951	0.91	Blood protein levels	29875488	Sun BB
ZH38T0016086	Intron	Verified unannotated TSS	rs11161343	rs12440086	1	Body mass index	28892062	Akiyama M
ZH38T0016195	Proximal	TSS unannotated transcript	rs117799466	Lead	*	Educational attainment (MTAG)	30038396	Lee JJ
ZH38T0016297	Intron	Local transcription	rs4924415	rs7181230	0.98	Dehydroepiandrosterone sulphate levels	21533175	Zhai G
ZH38T0016319	TSS	Verified GENCODE TSS	rs17733008	rs78153629	0.96	Heschl's gyrus morphology	25130324	Cai DC
ZH38T0016320	TSS	Verified GENCODE TSS	rs7164132	rs78153629	0.96	Heschl's gyrus morphology	25130324	Cai DC
ZH38T0016447	Proximal	Verified unannotated TSS	rs7174732	rs2470135	0.84	Diastolic blood pressure	28135244	Warren HR
ZH38T0016522	TSS	Verified unannotated TSS	rs1346266	rs1145074	0.98	Urinary albumin excretion	30220432	Haas ME
ZH38T0016600	Proximal	TSS unannotated transcript	rs8182079	rs12900430	0.83	Educational attainment (MTAG)	30038396	Lee JJ
ZH38T0016618	TSS	Verified GENCODE TSS	rs2606134	rs2061425	0.77	Educational attainment (MTAG)	30038396	Lee JJ
ZH38T0016618	TSS	Verified GENCODE TSS	rs2606134	rs1378892	0.99	Blood protein levels	29875488	Sun BB
ZH38T0016618	TSS	Verified GENCODE TSS	rs2606134	rs2252220	0.93	Cognitive performance (MTAG)	30038396	Lee JJ
ZH38T0016618	TSS	Verified GENCODE TSS	rs2606134	rs1456297	0.98	Blood protein levels	30072576	Emilsson V
ZH38T0016714	Intron	Verified unannotated TSS	rs12914418	rs2593235	0.83	Body mass index	28892062	Akiyama M
ZH38T0016842	Proximal	Verified unannotated TSS	rs7170846	rs1472631	0.94	Blood metabolite levels	24816252	Shin SY
ZH38T0016842	Proximal	Verified unannotated TSS	rs7170846	rs2652822	0.94	Serum metabolite levels	23093944	Krumsiek J
ZH38T0016843	TSS	Verified GENCODE TSS	rs2292038	rs1472631	0.93	Blood metabolite levels	24816252	Shin SY
ZH38T0016843	TSS	Verified GENCODE TSS	rs2292038	rs2652822	0.93	Serum metabolite levels	23093944	Krumsiek J
ZH38T0016920	TSS	Verified GENCODE TSS	rs4366668	rs6494537	0.78	Mean corpuscular hemoglobin	20139978	Kamatani Y
ZH38T0016920	TSS	Verified GENCODE TSS	rs4366668	rs2414884	0.89	Mean corpuscular volume	27863252	Astle WJ
ZH38T0016923	Intron	Verified unannotated TSS	rs12101597	rs6494537	0.81	Mean corpuscular hemoglobin	20139978	Kamatani Y
ZH38T0016923	Intron	Verified unannotated TSS	rs12101597	rs2414884	0.9	Mean corpuscular volume	27863252	Astle WJ
ZH38T0016924	TSS	Verified GENCODE TSS	rs1061554	rs12914495	0.84	Cognitive ability (MTAG)	29186694	Lam M
ZH38T0016924	TSS	Verified GENCODE TSS	rs1369312	rs12914495	0.9	Cognitive ability (MTAG)	29186694	Lam M
ZH38T0016924	TSS	Verified GENCODE TSS	rs1369312	rs2572207	0.74	Mean corpuscular hemoglobin	27863252	Astle WJ
ZH38T0016924	TSS	Verified GENCODE TSS	rs1061554	rs7175692	0.87	Educational attainment (MTAG)	30038396	Lee JJ
ZH38T0016924	TSS	Verified GENCODE TSS	rs1369312	rs7175692	0.93	Educational attainment (MTAG)	30038396	Lee JJ
ZH38T0016924	TSS	Verified GENCODE TSS	rs1061554	rs11857609	0.8	Mean corpuscular volume	29403010	Kanai M
ZH38T0016924	TSS	Verified GENCODE TSS	rs1369312	rs11857609	0.79	Mean corpuscular volume	29403010	Kanai M
ZH38T0016924	TSS	Verified GENCODE TSS	rs1061554	rs11857609	0.8	Mean corpuscular hemoglobin	29403010	Kanai M
ZH38T0016924	TSS	Verified GENCODE TSS	rs1369312	rs11857609	0.79	Mean corpuscular hemoglobin	29403010	Kanai M
ZH38T0016924	TSS	Verified GENCODE TSS	rs1061554	rs7175692	0.87	Cognitive performance (MTAG)	30038396	Lee JJ
ZH38T0016924	TSS	Verified GENCODE TSS	rs1369312	rs7175692	0.93	Cognitive performance (MTAG)	30038396	Lee JJ
ZH38T0016933	Proximal	Verified unannotated TSS	rs62013660	rs72748330	0.75	Educational attainment (MTAG)	30038396	Lee JJ
ZH38T0016975	Proximal	Verified unannotated TSS	rs16951723	rs7174755	0.85	Major depressive disorder	23377640	GENDEP Investigators
ZH38T0016977	Intron	Verified unannotated TSS	rs55700060	rs7174755	0.88	Major depressive disorder	23377640	GENDEP Investigators
ZH38T0017105	TSS	Verified GENCODE TSS	rs923118	Lead	*	Blood protein levels	30072576	Emilsson V
ZH38T0017107	Proximal	Verified unannotated TSS	rs11639369	rs923118	0.88	Blood protein levels	30072576	Emilsson V
ZH38T0017109	Proximal	Verified unannotated TSS	rs62003660	rs923118	0.88	Blood protein levels	30072576	Emilsson V
ZH38T0017129	Intergenic	TSS unannotated transcript	rs11072506	rs936226	0.71	Systolic blood pressure	27618452	Ehret GB
ZH38T0017129	Intergenic	TSS unannotated transcript	rs11072506	rs936226	0.71	Diastolic blood pressure	27618452	Ehret GB
ZH38T0017141	TSS	Verified GENCODE TSS	rs6495131	rs7495033	0.86	Educational attainment (MTAG)	30038396	Lee JJ
ZH38T0017181	Proximal	Verified unannotated TSS	rs10851885	rs11634028	0.71	Systolic blood pressure	30224653	Evangelou E
ZH38T0017226	TSS	Verified GENCODE TSS	rs12898295	Lead	*	Self-reported math ability	30038396	Lee JJ
ZH38T0017229	TSS	Verified GENCODE TSS	rs2037347	rs12898295	0.86	Self-reported math ability	30038396	Lee JJ
ZH38T0017229	TSS	Verified GENCODE TSS	rs2037347	rs56299741	0.7	Cognitive performance (MTAG)	30038396	Lee JJ
ZH38T0017261	TSS	Verified GENCODE TSS	rs1036939	rs3825932	0.89	Type 1 diabetes	18978792	Cooper JD
ZH38T0017261	TSS	Verified GENCODE TSS	rs1036939	rs3825932	0.89	Type 1 diabetes	19430480	Barrett JC
ZH38T0017261	TSS	Verified GENCODE TSS	rs2289702	rs34593439	1	Type 1 diabetes	25751624	Onengut-Gumuscu S
ZH38T0017261	TSS	Verified GENCODE TSS	rs2289702	rs34593439	1	Blood protein levels	29875488	Sun BB
ZH38T0017261	TSS	Verified GENCODE TSS	rs2289702	rs12592898	0.78	Blood protein levels	30072576	Emilsson V
ZH38T0017274	TSS	Verified GENCODE TSS	rs1138357	rs11632488	0.97	Primary sclerosing cholangitis	27992413	Ji SG
ZH38T0017274	TSS	Verified GENCODE TSS	rs1138358	rs11632488	0.97	Primary sclerosing cholangitis	27992413	Ji SG
ZH38T0017280	TSS	Verified GENCODE TSS	rs28759351	rs11634397	0.79	Type 2 diabetes	20581827	Voight BF
ZH38T0017293	TSS	Verified GENCODE TSS	rs11855057	rs1012541	0.98	Blood protein levels	30072576	Emilsson V
ZH38T0017293	TSS	Verified GENCODE TSS	rs11855085	rs1012541	0.98	Blood protein levels	30072576	Emilsson V
ZH38T0017293	TSS	Verified GENCODE TSS	rs11855135	rs1012541	0.98	Blood protein levels	30072576	Emilsson V
ZH38T0017330	TSS	Verified unannotated TSS	rs1124911	rs3743102	0.88	Colorectal adenoma (advanced)	29228715	Hofer P
ZH38T0017365	TSS	Verified GENCODE TSS	rs12904605	rs12912342	0.7	Blood protein levels	30072576	Emilsson V
ZH38T0017380	TSS	Verified GENCODE TSS	rs6497006	rs6496932	0.83	Central corneal thickness	20719862	Vitart V
ZH38T0017569	TSS	Verified GENCODE TSS	rs55816698	rs3752102	0.72	Blood protein levels	29875488	Sun BB
ZH38T0017627	TSS	Verified GENCODE TSS	rs8034564	rs7176647	0.8	Educational attainment (MTAG)	30038396	Lee JJ
ZH38T0017655	Proximal	Verified unannotated TSS	rs12902009	rs4965529	0.77	Systolic blood pressure	30224653	Evangelou E
ZH38T0017732	Proximal	Verified unannotated TSS	rs3837776	rs7191868	0.94	Platelet distribution width	27863252	Astle WJ
ZH38T0017740	Intron	Verified unannotated TSS	rs1981483	Lead,rs2017567,rs7204439	*,0.98,0.92	Disc degeneration (lumbar)	22993228	Williams FM
ZH38T0017749	TSS	Verified GENCODE TSS	rs4984682	Lead	*	Educational attainment (MTAG)	30038396	Lee JJ
ZH38T0017777	TSS	Verified GENCODE TSS	rs2003630	rs4984778	0.83	Blood protein levels	28240269	Suhre K
ZH38T0017814	TSS	Verified GENCODE TSS	rs3817902	rs1065656	0.98	Insulin-like growth factors	21216879	Kaplan RC
ZH38T0017840	TSS	Verified GENCODE TSS	rs11544570	rs35327014	0.77	Blood protein levels	29875488	Sun BB
ZH38T0017974	TSS	Verified GENCODE TSS	rs758747	Lead	*	Body mass index	26426971	Winkler TW
ZH38T0018106	TSS	Verified GENCODE TSS	rs181582	rs193778	0.93	Type 1 diabetes	25751624	Onengut-Gumuscu S
ZH38T0018107	TSS	Candidate GENCODE TSS	rs2301127	rs416603	0.83	Type 1 diabetes	18978792	Cooper JD
ZH38T0018311	TSS	Verified GENCODE TSS	rs79865622	rs11647589,rs1394678	0.9,0.71	Blood metabolite levels	24816252	Shin SY
ZH38T0018443	TSS	Verified GENCODE TSS	rs2189521	Lead	*	Primary biliary cholangitis	28425483	Qiu F
ZH38T0018455	TSS	Verified GENCODE TSS	rs149271	rs28449958	0.74	Crohn's disease	28067908	de Lange KM
ZH38T0018455	TSS	Verified GENCODE TSS	rs149271	rs4788084	0.92	Type 1 diabetes	19430480	Barrett JC
ZH38T0018455	TSS	Verified GENCODE TSS	rs149271	rs26528	0.79	Inflammatory bowel disease	26192919	Liu JZ
ZH38T0018455	TSS	Verified GENCODE TSS	rs149271	rs26528	0.79	Inflammatory bowel disease	23128233	Jostins L
ZH38T0018455	TSS	Verified GENCODE TSS	rs149271	rs143626010	0.73	Mosquito bite size	28199695	Jones AV
ZH38T0018455	TSS	Verified GENCODE TSS	rs149271	rs4788084	0.92	Type 1 diabetes	21829393	Plagnol V
ZH38T0018455	TSS	Verified GENCODE TSS	rs149271	rs62034325	0.73	Body mass index	28892062	Akiyama M
ZH38T0018455	TSS	Verified GENCODE TSS	rs149271	rs4787457	0.75	Educational attainment (MTAG)	30038396	Lee JJ
ZH38T0018455	TSS	Verified GENCODE TSS	rs149271	rs181209	0.75	Blood protein levels	29875488	Sun BB
ZH38T0018455	TSS	Verified GENCODE TSS	rs149271	rs79046494	0.75	General cognitive ability	29844566	Davies G
ZH38T0018465	TSS	Verified GENCODE TSS	rs67340371	rs151231	0.92	General cognitive ability	29844566	Davies G
ZH38T0018466	TSS	Candidate GENCODE TSS	rs62034351	rs28449958	0.75	Crohn's disease	28067908	de Lange KM
ZH38T0018466	TSS	Candidate GENCODE TSS	rs62034351	rs4788084	0.79	Type 1 diabetes	19430480	Barrett JC
ZH38T0018466	TSS	Candidate GENCODE TSS	rs62034351	rs143626010	0.73	Mosquito bite size	28199695	Jones AV
ZH38T0018466	TSS	Candidate GENCODE TSS	rs62034351	rs4788084	0.79	Type 1 diabetes	21829393	Plagnol V
ZH38T0018466	TSS	Candidate GENCODE TSS	rs62034351	rs62034325	0.78	Body mass index	28892062	Akiyama M
ZH38T0018466	TSS	Candidate GENCODE TSS	rs62034351	rs4787457	0.99	Educational attainment (MTAG)	30038396	Lee JJ
ZH38T0018466	TSS	Candidate GENCODE TSS	rs62034351	rs181209	0.73	Blood protein levels	29875488	Sun BB
ZH38T0018466	TSS	Candidate GENCODE TSS	rs62034351	rs79046494	0.75	General cognitive ability	29844566	Davies G
ZH38T0018467	Proximal	Verified unannotated TSS	rs7191618	rs28449958	0.72	Crohn's disease	28067908	de Lange KM
ZH38T0018467	Proximal	Verified unannotated TSS	rs7191618	rs4788084	0.89	Type 1 diabetes	19430480	Barrett JC
ZH38T0018467	Proximal	Verified unannotated TSS	rs7191618	rs26528	0.73	Inflammatory bowel disease	26192919	Liu JZ
ZH38T0018467	Proximal	Verified unannotated TSS	rs7191618	rs26528	0.73	Inflammatory bowel disease	23128233	Jostins L
ZH38T0018467	Proximal	Verified unannotated TSS	rs7191618	rs143626010	0.71	Mosquito bite size	28199695	Jones AV
ZH38T0018467	Proximal	Verified unannotated TSS	rs7191618	rs4788084	0.89	Type 1 diabetes	21829393	Plagnol V
ZH38T0018467	Proximal	Verified unannotated TSS	rs7191618	rs4787457	0.87	Educational attainment (MTAG)	30038396	Lee JJ
ZH38T0018467	Proximal	Verified unannotated TSS	rs7191618	rs79046494	0.72	General cognitive ability	29844566	Davies G
ZH38T0018468	TSS	Verified GENCODE TSS	rs762633	rs4788084	0.7	Type 1 diabetes	19430480	Barrett JC
ZH38T0018468	TSS	Verified GENCODE TSS	rs762633	rs4788084	0.7	Type 1 diabetes	21829393	Plagnol V
ZH38T0018468	TSS	Verified GENCODE TSS	rs762633	rs4787457	0.88	Educational attainment (MTAG)	30038396	Lee JJ
ZH38T0018476	TSS	Verified GENCODE TSS	rs7187776	rs8062405	0.93	Cognitive ability (MTAG)	29186694	Lam M
ZH38T0018476	TSS	Verified GENCODE TSS	rs7187776	rs3888190	0.71	Body mass index	26426971	Winkler TW
ZH38T0018476	TSS	Verified GENCODE TSS	rs7187776	rs12928404,rs62037364	0.96,0.7	Hand grip strength	29691431	Tikkanen E
ZH38T0018476	TSS	Verified GENCODE TSS	rs7187776	rs7359397	0.7	Body mass index	20935630	Speliotes EK
ZH38T0018476	TSS	Verified GENCODE TSS	rs7187776	rs7498665	0.71	Body mass index	19079261	Willer CJ
ZH38T0018476	TSS	Verified GENCODE TSS	rs7187776	rs12928404	0.96	Pediatric autoimmune diseases	26301688	Li YR
ZH38T0018476	TSS	Verified GENCODE TSS	rs7187776	rs62037363	0.71	Inflammatory bowel disease	26192919	Liu JZ
ZH38T0018476	TSS	Verified GENCODE TSS	rs7187776	rs12446589	0.7	Self-reported math ability	30038396	Lee JJ
ZH38T0018476	TSS	Verified GENCODE TSS	rs7187776	rs62037363	0.71	General cognitive ability	29844566	Davies G
ZH38T0018476	TSS	Verified GENCODE TSS	rs7187776	rs72793812	0.92	Cognitive performance (MTAG)	30038396	Lee JJ
ZH38T0018476	TSS	Verified GENCODE TSS	rs7187776	rs3888190	0.71	Body mass index	26961502	Wood AR
ZH38T0018479	TSS	Verified GENCODE TSS	rs11864750	rs8062405	0.72	Cognitive ability (MTAG)	29186694	Lam M
ZH38T0018479	TSS	Verified GENCODE TSS	rs7198606	rs8062405	0.73	Cognitive ability (MTAG)	29186694	Lam M
ZH38T0018479	TSS	Verified GENCODE TSS	rs11864750	rs3888190	0.99	Body mass index	26426971	Winkler TW
ZH38T0018479	TSS	Verified GENCODE TSS	rs7198606	rs3888190	1	Body mass index	26426971	Winkler TW
ZH38T0018479	TSS	Verified GENCODE TSS	rs11864750	rs62037364	0.98	Hand grip strength	29691431	Tikkanen E
ZH38T0018479	TSS	Verified GENCODE TSS	rs7198606	rs62037364	0.99	Hand grip strength	29691431	Tikkanen E
ZH38T0018479	TSS	Verified GENCODE TSS	rs11864750	rs7359397	0.99	Body mass index	20935630	Speliotes EK
ZH38T0018479	TSS	Verified GENCODE TSS	rs7198606	rs7359397	0.99	Body mass index	20935630	Speliotes EK
ZH38T0018479	TSS	Verified GENCODE TSS	rs11864750	rs7498665	0.99	Body mass index	19079261	Willer CJ
ZH38T0018479	TSS	Verified GENCODE TSS	rs7198606	rs7498665	1	Body mass index	19079261	Willer CJ
ZH38T0018479	TSS	Verified GENCODE TSS	rs11864750	rs62037363	0.98	Inflammatory bowel disease	26192919	Liu JZ
ZH38T0018479	TSS	Verified GENCODE TSS	rs7198606	rs62037363	0.98	Inflammatory bowel disease	26192919	Liu JZ
ZH38T0018479	TSS	Verified GENCODE TSS	rs11864750	rs3888190	1	Body mass index	28892062	Akiyama M
ZH38T0018479	TSS	Verified GENCODE TSS	rs7198606	rs3888190	1	Body mass index	28892062	Akiyama M
ZH38T0018479	TSS	Verified GENCODE TSS	rs11864750	rs56163509	0.86	Mean corpuscular volume	27863252	Astle WJ
ZH38T0018479	TSS	Verified GENCODE TSS	rs7198606	rs56163509	0.86	Mean corpuscular volume	27863252	Astle WJ
ZH38T0018479	TSS	Verified GENCODE TSS	rs11864750	rs12446589	0.98	Self-reported math ability	30038396	Lee JJ
ZH38T0018479	TSS	Verified GENCODE TSS	rs7198606	rs12446589	0.99	Self-reported math ability	30038396	Lee JJ
ZH38T0018479	TSS	Verified GENCODE TSS	rs11864750	rs62037363	0.98	General cognitive ability	29844566	Davies G
ZH38T0018479	TSS	Verified GENCODE TSS	rs7198606	rs62037363	0.98	General cognitive ability	29844566	Davies G
ZH38T0018479	TSS	Verified GENCODE TSS	rs11864750	rs72793812	0.71	Cognitive performance (MTAG)	30038396	Lee JJ
ZH38T0018479	TSS	Verified GENCODE TSS	rs7198606	rs72793812	0.72	Cognitive performance (MTAG)	30038396	Lee JJ
ZH38T0018479	TSS	Verified GENCODE TSS	rs11864750	rs3888190	0.99	Body mass index	26961502	Wood AR
ZH38T0018479	TSS	Verified GENCODE TSS	rs7198606	rs3888190	1	Body mass index	26961502	Wood AR
ZH38T0018551	Proximal	Verified unannotated TSS	rs12716973	rs7204797	0.73	Body mass index	26426971	Winkler TW
ZH38T0018551	Proximal	Verified unannotated TSS	rs12716973	rs12691307	0.85	Hand grip strength	29691431	Tikkanen E
ZH38T0018563	Proximal	Verified unannotated TSS	rs4788213	rs2278557	0.75	Mean corpuscular volume	29403010	Kanai M
ZH38T0018566	Intergenic	Verified unannotated TSS	rs4788215	rs2278557	0.75	Mean corpuscular volume	29403010	Kanai M
ZH38T0018589	TSS	Verified GENCODE TSS	rs73530179	rs2278557	0.92	Mean corpuscular volume	29403010	Kanai M
ZH38T0018682	Proximal	Verified unannotated TSS	rs35675346	rs72799341	1	Diastolic blood pressure	28135244	Warren HR
ZH38T0018695	TSS	Verified GENCODE TSS	rs12445650	rs9923231	0.89	Warfarin maintenance dose	20833655	Cha PC
ZH38T0018695	TSS	Verified GENCODE TSS	rs12445650	rs11864839	0.91	Self-reported math ability	30038396	Lee JJ
ZH38T0018700	TSS	Verified GENCODE TSS	rs2303222	rs9925964	0.76	Body mass index	26426971	Winkler TW
ZH38T0018700	TSS	Verified GENCODE TSS	rs2303222	rs9923231	1	Warfarin maintenance dose	20833655	Cha PC
ZH38T0018700	TSS	Verified GENCODE TSS	rs2303222	rs10871454	0.9	Warfarin maintenance dose	18535201	Cooper GM
ZH38T0018700	TSS	Verified GENCODE TSS	rs2303222	rs9923231	0.92	Warfarin maintenance dose	19300499	Takeuchi F
ZH38T0018814	Proximal	Verified unannotated TSS	rs12930156	rs3803662	0.96	Breast cancer (male)	23001122	Orr N
ZH38T0018979	TSS	Verified GENCODE TSS	rs1646276	rs12709013	0.8	Blood metabolite ratios	24816252	Shin SY
ZH38T0019030	Proximal	Verified unannotated TSS	rs45474499	Lead	*	Diastolic blood pressure	30224653	Evangelou E
ZH38T0019130	TSS	Verified GENCODE TSS	rs3785100	rs1109166,rs2292318	0.87,0.92	HDL cholesterol levels	28334899	Spracklen CN
ZH38T0019147	TSS	Verified GENCODE TSS	rs3743735	rs2292318	0.71	HDL cholesterol levels	28334899	Spracklen CN
ZH38T0019163	TSS	Verified GENCODE TSS	rs1170443	rs1728785	0.91	Ulcerative colitis	28067908	de Lange KM
ZH38T0019163	TSS	Verified GENCODE TSS	rs1170444	rs1728785	0.94	Ulcerative colitis	28067908	de Lange KM
ZH38T0019245	TSS	Verified GENCODE TSS	rs5472	rs2000999	0.92	LDL cholesterol levels	28334899	Spracklen CN
ZH38T0019245	TSS	Verified GENCODE TSS	rs5472	rs2000999	0.92	Total cholesterol levels	28334899	Spracklen CN
ZH38T0019249	Intron	Verified unannotated TSS	rs2000999	Lead	*	Blood protein levels	28240269	Suhre K
ZH38T0019249	Intron	Verified unannotated TSS	rs2000999	Lead	*	LDL cholesterol levels	28334899	Spracklen CN
ZH38T0019249	Intron	Verified unannotated TSS	rs2000999	Lead	*	Total cholesterol levels	28334899	Spracklen CN
ZH38T0019249	Intron	Verified unannotated TSS	rs2000999	rs34042070	0.93	Blood protein levels	29875488	Sun BB
ZH38T0019252	Proximal	Verified unannotated TSS	rs7194397	rs2000999	0.71	LDL cholesterol levels	28334899	Spracklen CN
ZH38T0019252	Proximal	Verified unannotated TSS	rs7194397	rs2000999	0.71	Total cholesterol levels	28334899	Spracklen CN
ZH38T0019307	TSS	Verified GENCODE TSS	rs146784495	rs117132064	0.96	Blood protein levels	29875488	Sun BB
ZH38T0019311	Proximal	Verified unannotated TSS	rs117757420	rs117132064	0.87	Blood protein levels	29875488	Sun BB
ZH38T0019312	Intron	Verified unannotated TSS	rs146202479	rs117132064	0.8	Blood protein levels	29875488	Sun BB
ZH38T0019419	TSS	Verified GENCODE TSS	rs16962855	rs4378600	0.76	Educational attainment (MTAG)	30038396	Lee JJ
ZH38T0019543	TSS	Verified GENCODE TSS	rs117565673	Lead	*	Mean corpuscular hemoglobin	27863252	Astle WJ
ZH38T0019582	TSS	Verified GENCODE TSS	rs1800282	rs76888998	0.74	Self-reported math ability	30038396	Lee JJ
ZH38T0019686	TSS	Verified GENCODE TSS	rs58697961	rs62088172	0.99	Blood protein levels	29875488	Sun BB
ZH38T0019686	TSS	Verified GENCODE TSS	rs58697961	rs1136287	0.93	Blood protein levels	30072576	Emilsson V
ZH38T0019757	TSS	Verified GENCODE TSS	rs114582898	rs77246175	0.76	Blood protein levels	30072576	Emilsson V
ZH38T0019759	Proximal	Verified unannotated TSS	rs78613183	rs77246175	0.71	Blood protein levels	30072576	Emilsson V
ZH38T0019952	TSS	Verified GENCODE TSS	rs5417	Lead	*	Diastolic blood pressure	28135244	Warren HR
ZH38T0019952	TSS	Verified GENCODE TSS	rs5418	rs5417	0.98	Diastolic blood pressure	28135244	Warren HR
ZH38T0019987	Proximal	Local transcription	rs111259369	rs72827503	0.88	Educational attainment (MTAG)	30038396	Lee JJ
ZH38T0019987	Proximal	Local transcription	rs59665520	rs72827503	0.93	Educational attainment (MTAG)	30038396	Lee JJ
ZH38T0020048	Intron	Verified unannotated TSS	rs7503751	Lead	*	Systolic blood pressure	28739976	Wain LV
ZH38T0020080	TSS	Verified GENCODE TSS	rs3027172	rs76539190	0.72	General cognitive ability	29844566	Davies G
ZH38T0020087	TSS	Verified unannotated TSS	rs11650713	rs8069739	0.98	Diastolic blood pressure	30224653	Evangelou E
ZH38T0020330	TSS	Verified GENCODE TSS	rs11548434	rs7223173	0.71	Motor composite score	30120420	Sun R
ZH38T0020347	TSS	Verified GENCODE TSS	rs2233072	rs12938803	0.77	Diastolic blood pressure	30224653	Evangelou E
ZH38T0020363	Intergenic	TSS unannotated transcript	rs7221211	rs887241	0.98	Blood protein levels	29875488	Sun BB
ZH38T0020363	Intergenic	TSS unannotated transcript	rs7221211	rs2108967	0.95	Blood protein levels	30072576	Emilsson V
ZH38T0020368	TSS	Verified GENCODE TSS	rs8067545	rs34848191	0.8	Mean corpuscular hemoglobin	27863252	Astle WJ
ZH38T0020368	TSS	Verified GENCODE TSS	rs8067545	rs7218708	0.89	Mean corpuscular volume	27863252	Astle WJ
ZH38T0020368	TSS	Verified GENCODE TSS	rs8067545	rs7218708	0.89	Educational attainment (MTAG)	30038396	Lee JJ
ZH38T0020419	Intergenic	Local transcription	rs34295936	rs4795519	0.81	Chronic myeloid leukemia	21540461	Kim DH
ZH38T0020420	Proximal	Verified unannotated TSS	rs11867203	rs4795519	0.81	Chronic myeloid leukemia	21540461	Kim DH
ZH38T0020434	TSS	Verified GENCODE TSS	rs3751093	rs62055780	0.73	Blood protein levels	30072576	Emilsson V
ZH38T0020499	TSS	Verified unannotated TSS	rs113231461	rs9892942	0.9	Mean corpuscular hemoglobin	27863252	Astle WJ
ZH38T0020499	TSS	Verified unannotated TSS	rs113231461	rs9892942	0.9	Mean corpuscular volume	27863252	Astle WJ
ZH38T0020499	TSS	Verified unannotated TSS	rs113231461	rs9913973	0.97	Mean corpuscular hemoglobin	29403010	Kanai M
ZH38T0020529	Intron	Verified unannotated TSS	rs9906043	rs10438797	0.79	Night sleep phenotypes	27126917	Spada J
ZH38T0020578	Proximal	Verified unannotated TSS	rs11650924	rs17826219	0.78	Body mass index	28892062	Akiyama M
ZH38T0020578	Proximal	Verified unannotated TSS	rs11650928	rs17826219	0.73	Body mass index	28892062	Akiyama M
ZH38T0020578	Proximal	Verified unannotated TSS	rs11650924	rs12946563	0.73	Mean corpuscular hemoglobin	29403010	Kanai M
ZH38T0020578	Proximal	Verified unannotated TSS	rs11650928	rs12946563	0.7	Mean corpuscular hemoglobin	29403010	Kanai M
ZH38T0020579	TSS	Verified GENCODE TSS	rs3752019	rs17826219	1	Body mass index	28892062	Akiyama M
ZH38T0020579	TSS	Verified GENCODE TSS	rs3752019	rs12946563	0.81	Mean corpuscular hemoglobin	29403010	Kanai M
ZH38T0020582	Proximal	Verified unannotated TSS	rs2269915	rs17826219	0.97	Body mass index	28892062	Akiyama M
ZH38T0020582	Proximal	Verified unannotated TSS	rs2269915	rs12946563	0.79	Mean corpuscular hemoglobin	29403010	Kanai M
ZH38T0020666	Proximal	Local transcription	rs75981990	rs112346425	0.92	Mean platelet volume	27863252	Astle WJ
ZH38T0020687	TSS	Verified GENCODE TSS	rs113937434	rs117321474	0.76	Blood protein levels	29875488	Sun BB
ZH38T0020687	TSS	Verified GENCODE TSS	rs75238886	rs117321474	0.76	Blood protein levels	29875488	Sun BB
ZH38T0020688	TSS	Verified GENCODE TSS	rs2293788	rs16971802	0.75	Blood protein levels	28240269	Suhre K
ZH38T0020688	TSS	Verified GENCODE TSS	rs2293788	rs16971802	0.75	Blood protein levels	29875488	Sun BB
ZH38T0020689	TSS	Verified GENCODE TSS	rs2072667	rs117321474	1	Blood protein levels	29875488	Sun BB
ZH38T0020690	TSS	Verified GENCODE TSS	rs2015086	rs854462,rs9904601	0.96,0.78	Blood protein levels	28240269	Suhre K
ZH38T0020690	TSS	Verified GENCODE TSS	rs2015086	Lead,rs712042	*,0.99	Blood protein levels	29875488	Sun BB
ZH38T0020690	TSS	Verified GENCODE TSS	rs2015086	rs1102934,rs712042	0.99,0.99	Blood protein levels	30072576	Emilsson V
ZH38T0020699	TSS	Verified GENCODE TSS	rs4796224	rs8070260	0.94	Self-reported math ability	30038396	Lee JJ
ZH38T0020699	TSS	Verified GENCODE TSS	rs4796224	rs2285640	0.76	General cognitive ability	29844566	Davies G
ZH38T0020705	Proximal	Verified unannotated TSS	rs3736165	rs12150665	0.95	Body mass index	26426971	Winkler TW
ZH38T0020705	Proximal	Verified unannotated TSS	rs3736165	rs12150665	0.98	Body mass index	28892062	Akiyama M
ZH38T0020705	Proximal	Verified unannotated TSS	rs3736165	rs12601380	0.92	Educational attainment (MTAG)	30038396	Lee JJ
ZH38T0020705	Proximal	Verified unannotated TSS	rs3736165	rs12601380	0.92	Cognitive performance (MTAG)	30038396	Lee JJ
ZH38T0020706	TSS	Verified GENCODE TSS	rs3736167	rs12150665	0.92	Body mass index	26426971	Winkler TW
ZH38T0020706	TSS	Verified GENCODE TSS	rs3736167	rs12150665	0.98	Body mass index	28892062	Akiyama M
ZH38T0020706	TSS	Verified GENCODE TSS	rs3736167	rs12601380	0.89	Educational attainment (MTAG)	30038396	Lee JJ
ZH38T0020706	TSS	Verified GENCODE TSS	rs3736166	rs8070260	0.87	Self-reported math ability	30038396	Lee JJ
ZH38T0020706	TSS	Verified GENCODE TSS	rs3736166	rs2285640	0.91	General cognitive ability	29844566	Davies G
ZH38T0020706	TSS	Verified GENCODE TSS	rs3736167	rs12601380	0.89	Cognitive performance (MTAG)	30038396	Lee JJ
ZH38T0020814	Proximal	Verified unannotated TSS	rs931992	rs12453682	0.76	Mean corpuscular hemoglobin	27863252	Astle WJ
ZH38T0020814	Proximal	Verified unannotated TSS	rs931992	rs1877031	0.96	HDL cholesterol levels	28334899	Spracklen CN
ZH38T0020814	Proximal	Verified unannotated TSS	rs931992	rs12453682	0.76	Educational attainment (MTAG)	30038396	Lee JJ
ZH38T0020828	TSS	Verified GENCODE TSS	rs1453559	rs9303277	0.71	Primary biliary cholangitis	28062665	Kawashima M
ZH38T0020828	TSS	Verified GENCODE TSS	rs1453559	rs8067378	0.97	Primary biliary cirrhosis	22961000	Liu JZ
ZH38T0020828	TSS	Verified GENCODE TSS	rs1453559	rs12936409,rs2872507	0.81,0.81	Rheumatoid arthritis (ACPA-positive)	23143596	Eyre S
ZH38T0020828	TSS	Verified GENCODE TSS	rs1453559	rs9303277	0.83	Primary biliary cholangitis	20639880	Liu X
ZH38T0020828	TSS	Verified GENCODE TSS	rs1453559	rs2290400	0.85	Type 1 diabetes	19430480	Barrett JC
ZH38T0020828	TSS	Verified GENCODE TSS	rs1453559	rs9303277	0.83	Primary biliary cholangitis	26394269	Cordell HJ
ZH38T0020828	TSS	Verified GENCODE TSS	rs1453559	rs12232497	0.81	Pediatric autoimmune diseases	26301688	Li YR
ZH38T0020828	TSS	Verified GENCODE TSS	rs1453559	rs4795397	0.84	Inflammatory bowel disease	26192919	Liu JZ
ZH38T0020828	TSS	Verified GENCODE TSS	rs1453559	rs9303277	0.71	Primary biliary cholangitis	23000144	Nakamura M
ZH38T0020828	TSS	Verified GENCODE TSS	rs1453559	rs2305480	0.77	Asthma (childhood onset)	24241537	Bonnelykke K
ZH38T0020828	TSS	Verified GENCODE TSS	rs1453559	rs2872507	0.81	Type 1 diabetes	21829393	Plagnol V
ZH38T0020828	TSS	Verified GENCODE TSS	rs1453559	rs12453507	0.85	Type 1 diabetes	25751624	Onengut-Gumuscu S
ZH38T0020828	TSS	Verified GENCODE TSS	rs1453559	rs8065777	0.75	Educational attainment (MTAG)	30038396	Lee JJ
ZH38T0020829	TSS	Verified GENCODE TSS	rs11557466	rs9303277	0.71	Primary biliary cholangitis	28062665	Kawashima M
ZH38T0020829	TSS	Verified GENCODE TSS	rs11557466	rs12946510	0.73	Crohn's disease	28067908	de Lange KM
ZH38T0020829	TSS	Verified GENCODE TSS	rs11557466	rs12946510	0.73	Ulcerative colitis	28067908	de Lange KM
ZH38T0020829	TSS	Verified GENCODE TSS	rs11557466	rs8067378	0.82	Primary biliary cirrhosis	22961000	Liu JZ
ZH38T0020829	TSS	Verified GENCODE TSS	rs11557466	rs12936409,rs2872507	0.98,0.99	Rheumatoid arthritis (ACPA-positive)	23143596	Eyre S
ZH38T0020829	TSS	Verified GENCODE TSS	rs11557466	rs2290400	0.71	Type 1 diabetes	19430480	Barrett JC
ZH38T0020829	TSS	Verified GENCODE TSS	rs11557466	rs907092	0.79	Primary biliary cholangitis	19458352	Hirschfield GM
ZH38T0020829	TSS	Verified GENCODE TSS	rs11557466	rs12232497	0.99	Pediatric autoimmune diseases	26301688	Li YR
ZH38T0020829	TSS	Verified GENCODE TSS	rs11557466	rs12946510,rs4795397	0.73,0.97	Inflammatory bowel disease	26192919	Liu JZ
ZH38T0020829	TSS	Verified GENCODE TSS	rs11557466	rs9303277	0.71	Primary biliary cholangitis	23000144	Nakamura M
ZH38T0020829	TSS	Verified GENCODE TSS	rs11557466	rs2305480	0.95	Asthma (childhood onset)	24241537	Bonnelykke K
ZH38T0020829	TSS	Verified GENCODE TSS	rs11557466	rs12946510	0.73	Inflammatory bowel disease	23128233	Jostins L
ZH38T0020829	TSS	Verified GENCODE TSS	rs11557466	rs2872507	0.99	Type 1 diabetes	21829393	Plagnol V
ZH38T0020829	TSS	Verified GENCODE TSS	rs11557466	rs12453507	0.78	Type 1 diabetes	25751624	Onengut-Gumuscu S
ZH38T0021018	TSS	Verified GENCODE TSS	rs4432296	rs12602950	0.97	Blood protein levels	30072576	Emilsson V
ZH38T0021028	Exon	TSS unannotated transcript	rs1122326	rs7224737	0.99	Fibrinogen levels	26561523	de Vries PS
ZH38T0021028	Exon	TSS unannotated transcript	rs1122326	rs7224737	0.99	Fibrinogen levels	28107422	de Vries PS
ZH38T0021111	Intergenic	TSS unannotated transcript	rs2171462	rs74252763	0.79	Blood protein levels	30072576	Emilsson V
ZH38T0021111	Intergenic	TSS unannotated transcript	rs35312672	rs74252763	0.8	Blood protein levels	30072576	Emilsson V
ZH38T0021111	Intergenic	TSS unannotated transcript	rs75467880	rs74252763	0.82	Blood protein levels	30072576	Emilsson V
ZH38T0021113	Intron	Local transcription	rs116409325	rs74252763	0.8	Blood protein levels	30072576	Emilsson V
ZH38T0021139	TSS	Verified GENCODE TSS	rs2070592	rs8074783	0.91	Blood protein levels	30072576	Emilsson V
ZH38T0021152	TSS	Verified GENCODE TSS	rs74635090	rs12602486	0.97	Glycated hemoglobin levels	24244560	Chen P
ZH38T0021226	TSS	Verified GENCODE TSS	rs62064651	rs1879586	0.78	Epithelial ovarian cancer	28346442	Phelan CM
ZH38T0021228	Intron	Verified unannotated TSS	rs34018943	rs1879586	0.78	Epithelial ovarian cancer	28346442	Phelan CM
ZH38T0021229	Intron	Verified unannotated TSS	rs62064652	rs1879586	0.71	Epithelial ovarian cancer	28346442	Phelan CM
ZH38T0021230	TSS	Verified GENCODE TSS	rs55642947	rs1879586	0.78	Epithelial ovarian cancer	28346442	Phelan CM
ZH38T0021239	TSS	Verified GENCODE TSS	rs144722105	rs17563986	0.87	Cognitive ability (MTAG)	29186694	Lam M
ZH38T0021239	TSS	Verified GENCODE TSS	rs62056779	rs17563986	0.86	Cognitive ability (MTAG)	29186694	Lam M
ZH38T0021239	TSS	Verified GENCODE TSS	rs144722105	rs17564829	0.89	Primary biliary cirrhosis	22961000	Liu JZ
ZH38T0021239	TSS	Verified GENCODE TSS	rs62056779	rs17564829	0.89	Primary biliary cirrhosis	22961000	Liu JZ
ZH38T0021239	TSS	Verified GENCODE TSS	rs144722105	rs17769552	0.94	Hand grip strength	29691431	Tikkanen E
ZH38T0021239	TSS	Verified GENCODE TSS	rs62056779	rs17769552	0.93	Hand grip strength	29691431	Tikkanen E
ZH38T0021239	TSS	Verified GENCODE TSS	rs144722105	rs17690703	0.79	Idiopathic pulmonary fibrosis	24429156	Noth I
ZH38T0021239	TSS	Verified GENCODE TSS	rs62056779	rs17690703	0.78	Idiopathic pulmonary fibrosis	24429156	Noth I
ZH38T0021239	TSS	Verified GENCODE TSS	rs144722105	rs62057107	0.97	Educational attainment (MTAG)	30038396	Lee JJ
ZH38T0021239	TSS	Verified GENCODE TSS	rs62056779	rs62057107	0.96	Educational attainment (MTAG)	30038396	Lee JJ
ZH38T0021241	Intron	TSS unannotated transcript	rs62061721	rs17563986	0.98	Cognitive ability (MTAG)	29186694	Lam M
ZH38T0021241	Intron	TSS unannotated transcript	rs62061721	rs17564829	1	Primary biliary cirrhosis	22961000	Liu JZ
ZH38T0021241	Intron	TSS unannotated transcript	rs62061721	rs17769552	0.85	Hand grip strength	29691431	Tikkanen E
ZH38T0021241	Intron	TSS unannotated transcript	rs62061721	rs17690703	0.74	Idiopathic pulmonary fibrosis	24429156	Noth I
ZH38T0021241	Intron	TSS unannotated transcript	rs62061721	rs62057107	0.88	Educational attainment (MTAG)	30038396	Lee JJ
ZH38T0021242	Intron	Verified unannotated TSS	rs77009866	rs8070723	0.95	Progressive supranuclear palsy	21685912	Hoglinger GU
ZH38T0021242	Intron	Verified unannotated TSS	rs77009866	rs1981997	0.96	Interstitial lung disease	23583980	Fingerlin TE
ZH38T0021242	Intron	Verified unannotated TSS	rs77009866	rs2696579	0.77	Mean corpuscular hemoglobin	27863252	Astle WJ
ZH38T0021242	Intron	Verified unannotated TSS	rs77009866	rs35524223	0.7	Lung function (FEV1)	28166213	Wain LV
ZH38T0021242	Intron	Verified unannotated TSS	rs77009866	rs35524223	0.7	Lung function (FVC)	28166213	Wain LV
ZH38T0021242	Intron	Verified unannotated TSS	rs77009866	rs2696579	0.77	Mean corpuscular volume	27863252	Astle WJ
ZH38T0021242	Intron	Verified unannotated TSS	rs77009866	rs1052553	0.96	Type 1 diabetes	25751624	Onengut-Gumuscu S
ZH38T0021242	Intron	Verified unannotated TSS	rs77009866	rs242559	0.86	General cognitive ability	29844566	Davies G
ZH38T0021318	TSS	Verified GENCODE TSS	rs4794453	rs6504108	0.7	Body mass index	28892062	Akiyama M
ZH38T0021324	Intron	Local transcription	rs9747133	rs9303542	0.97	Epithelial ovarian cancer	25581431	Kuchenbaecker KB
ZH38T0021324	Intron	Local transcription	rs9747133	rs7207826	0.92	Epithelial ovarian cancer	28346442	Phelan CM
ZH38T0021374	Proximal	Local transcription	rs2270574	rs46522	0.95	Coronary heart disease	21378990	Schunkert H
ZH38T0021374	Proximal	Local transcription	rs2270574	rs62078384	0.83	Educational attainment (MTAG)	30038396	Lee JJ
ZH38T0021374	Proximal	Local transcription	rs2270574	rs1058018	0.76	Type 2 diabetes	27362418	Zhang H
ZH38T0021487	TSS	Verified GENCODE TSS	rs9890200	rs989128	0.89	Type 2 diabetes	28566273	Scott RA
ZH38T0021487	TSS	Verified GENCODE TSS	rs9890200	Lead	*	Blood protein levels	29875488	Sun BB
ZH38T0021487	TSS	Verified GENCODE TSS	rs9890200	rs989128	0.89	Blood protein levels	30072576	Emilsson V
ZH38T0021602	TSS	Verified GENCODE TSS	rs2586031	rs1443267	1	Obstetric antiphospholipid syndrome	28424481	Sugiura-Ogasawara M
ZH38T0021637	TSS	Verified unannotated TSS	rs430973	rs34430710	0.8	Systolic blood pressure	30224653	Evangelou E
ZH38T0021646	TSS	Verified GENCODE TSS	rs7503190	rs74370218	0.85	General cognitive ability	29844566	Davies G
ZH38T0021721	Intron	Verified unannotated TSS	rs1000423	rs2240736	0.97	Systolic blood pressure	28739976	Wain LV
ZH38T0021736	Intron	Verified unannotated TSS	rs113301871	rs737037	0.81	Self-reported math ability	30038396	Lee JJ
ZH38T0021736	Intron	Verified unannotated TSS	rs113301871	rs2430926	0.82	Cognitive performance (MTAG)	30038396	Lee JJ
ZH38T0021749	TSS	Verified GENCODE TSS	rs4316	rs4343	0.94	Angiotensin-converting enzyme activity	20066004	Chung CM
ZH38T0021749	TSS	Verified GENCODE TSS	rs4316	rs4351,rs4362	0.96,0.9	Blood metabolite levels	24816252	Shin SY
ZH38T0021749	TSS	Verified GENCODE TSS	rs4316	rs4343	0.94	Blood metabolite ratios	24816252	Shin SY
ZH38T0021749	TSS	Verified GENCODE TSS	rs4316	rs4325,rs4343,rs4351	0.98,0.94,0.96	Serum metabolite levels	23093944	Krumsiek J
ZH38T0021749	TSS	Verified GENCODE TSS	rs4316	rs4344	0.97	Blood protein levels	30072576	Emilsson V
ZH38T0021853	TSS	Verified GENCODE TSS	rs8178822	rs8178847	1	Blood protein levels	28240269	Suhre K
ZH38T0021853	TSS	Verified GENCODE TSS	rs8178822	rs1801690	0.73	Blood protein levels	29875488	Sun BB
ZH38T0021853	TSS	Verified GENCODE TSS	rs8178822	rs1801690	0.76	Creatine kinase levels	29403010	Kanai M
ZH38T0021853	TSS	Verified GENCODE TSS	rs8178822	rs1801690	0.73	Blood protein levels	30072576	Emilsson V
ZH38T0021871	Intron	TSS unannotated transcript	rs7212293	rs80135947,rs8073510	0.99,0.99	Hand grip strength	29691431	Tikkanen E
ZH38T0021871	Intron	TSS unannotated transcript	rs7212293	rs12602912,rs4790981	0.98,0.78	Body mass index	28892062	Akiyama M
ZH38T0021881	TSS	Verified GENCODE TSS	rs12752	rs62084690	0.8	Self-reported math ability	30038396	Lee JJ
ZH38T0021882	Intergenic	TSS unannotated transcript	rs7503096	rs62084690	0.75	Self-reported math ability	30038396	Lee JJ
ZH38T0022049	Proximal	Verified unannotated TSS	rs7216673	rs7218675	0.93	Lung function (FEV1)	28166213	Wain LV
ZH38T0022079	TSS	Verified GENCODE TSS	rs2165634	rs820218	0.7	Rotator cuff tears	26350878	Tashjian RZ
ZH38T0022079	TSS	Verified GENCODE TSS	rs2165635	rs820218	0.7	Rotator cuff tears	26350878	Tashjian RZ
ZH38T0022080	TSS	Verified GENCODE TSS	rs2165634	rs820218	0.7	Rotator cuff tears	26350878	Tashjian RZ
ZH38T0022080	TSS	Verified GENCODE TSS	rs2165635	rs820218	0.7	Rotator cuff tears	26350878	Tashjian RZ
ZH38T0022080	TSS	Verified GENCODE TSS	rs864234	rs820218	0.85	Rotator cuff tears	26350878	Tashjian RZ
ZH38T0022157	TSS	Verified GENCODE TSS	rs3744061	Lead	*	Retinal arteriolar caliber	23776548	Sim X
ZH38T0022206	TSS	Verified GENCODE TSS	rs2748424	Lead	*	Mean corpuscular volume	29403010	Kanai M
ZH38T0022206	TSS	Verified GENCODE TSS	rs2748425	rs2748424	0.72	Mean corpuscular volume	29403010	Kanai M
ZH38T0022206	TSS	Verified GENCODE TSS	rs2748424	Lead	*	Mean corpuscular hemoglobin	29403010	Kanai M
ZH38T0022206	TSS	Verified GENCODE TSS	rs2748425	rs2748424	0.72	Mean corpuscular hemoglobin	29403010	Kanai M
ZH38T0022269	Proximal	Verified unannotated TSS	rs8074547	rs11871061,rs8065292	0.94,0.76	Blood protein levels	29875488	Sun BB
ZH38T0022269	Proximal	Verified unannotated TSS	rs8074547	rs35759773	0.91	Blood protein levels	30072576	Emilsson V
ZH38T0022270	Intron	TSS unannotated transcript	rs9916601	rs11871061,rs8065292	0.85,0.89	Blood protein levels	29875488	Sun BB
ZH38T0022270	Intron	TSS unannotated transcript	rs9916601	rs35759773	0.75	Blood protein levels	30072576	Emilsson V
ZH38T0022342	Intron	Verified unannotated TSS	rs11657730	rs112280096	0.78	Systolic blood pressure	30224653	Evangelou E
ZH38T0022367	Proximal	Verified unannotated TSS	rs60389196	rs8075598	0.73	Non-albumin protein levels	29403010	Kanai M
ZH38T0022373	TSS	TSS unannotated transcript	rs1132802	rs62077184	0.95	General cognitive ability	29844566	Davies G
ZH38T0022432	Intron	Verified unannotated TSS	rs62079996	rs4625783	0.92	Blood metabolite levels	24816252	Shin SY
ZH38T0022432	Intron	Verified unannotated TSS	rs7218075	rs4625783	0.93	Blood metabolite levels	24816252	Shin SY
ZH38T0022432	Intron	Verified unannotated TSS	rs62079996	rs11653003	0.85	Blood protein levels	30072576	Emilsson V
ZH38T0022432	Intron	Verified unannotated TSS	rs7218075	rs11653003	0.86	Blood protein levels	30072576	Emilsson V
ZH38T0022446	TSS	Verified GENCODE TSS	rs116473040	Lead	*	Blood protein levels	30072576	Emilsson V
ZH38T0022449	TSS	Verified GENCODE TSS	rs114078868	rs116473040,rs79181084	0.78,0.83	Blood protein levels	30072576	Emilsson V
ZH38T0022449	TSS	Verified GENCODE TSS	rs114632593	rs116473040,rs79181084	0.78,0.83	Blood protein levels	30072576	Emilsson V
ZH38T0022449	TSS	Verified GENCODE TSS	rs74001634	rs116473040,rs79181084	0.84,0.78	Blood protein levels	30072576	Emilsson V
ZH38T0022450	Intergenic	Local transcription	rs79181084	Lead	*	Blood protein levels	30072576	Emilsson V
ZH38T0022571	TSS	Verified GENCODE TSS	rs1061666	rs7227931	0.71	General cognitive ability	29844566	Davies G
ZH38T0022692	TSS	Verified GENCODE TSS	rs11663049	rs3809912	0.81	Cognitive ability (MTAG)	29186694	Lam M
ZH38T0022692	TSS	Verified GENCODE TSS	rs11663049	rs569453	0.93	Educational attainment (MTAG)	30038396	Lee JJ
ZH38T0022692	TSS	Verified GENCODE TSS	rs11663049	rs1787003,rs9948681	0.85,0.79	General cognitive ability	29844566	Davies G
ZH38T0022692	TSS	Verified GENCODE TSS	rs11663049	rs3809912	0.81	Cognitive performance (MTAG)	30038396	Lee JJ
ZH38T0022732	Proximal	Verified unannotated TSS	rs11662724	rs11662721	0.74	Phospholipid levels (plasma)	22359512	Demirkan A
ZH38T0022764	Proximal	Local transcription	rs4800487	rs6507716	0.83	Body mass index	26426971	Winkler TW
ZH38T0022764	Proximal	Local transcription	rs4800487	rs1808579	0.82	Body mass index	26961502	Wood AR
ZH38T0022925	Intron	Verified unannotated TSS	rs2726223	rs9964831	0.71	Self-reported math ability	30038396	Lee JJ
ZH38T0022953	Intergenic	Verified unannotated TSS	rs269979	rs269985	1	Cognitive performance (MTAG)	30038396	Lee JJ
ZH38T0022958	TSS	Verified GENCODE TSS	rs3819179	rs1484878	0.99	Mean corpuscular volume	29403010	Kanai M
ZH38T0022965	TSS	Verified GENCODE TSS	rs8085444	rs11874712	0.87	Migraine - clinic-based	23793025	Anttila V
ZH38T0022980	Proximal	Verified unannotated TSS	rs4890706	rs13381557	0.78	Educational attainment (MTAG)	30038396	Lee JJ
ZH38T0022982	TSS	Verified GENCODE TSS	rs3809965	rs75228657	1	Blood protein levels	29875488	Sun BB
ZH38T0022982	TSS	Verified GENCODE TSS	rs3809965	rs76922914	1	Blood protein levels	30072576	Emilsson V
ZH38T0023170	Intergenic	Local transcription	rs9966911	rs591166	0.83	Body mass index	24861553	Wen W
ZH38T0023170	Intergenic	Local transcription	rs9966911	rs6567160	0.7	Body mass index	28892062	Akiyama M
ZH38T0023245	Intron	Verified unannotated TSS	rs60779794	rs185898	1	Mean platelet volume	27863252	Astle WJ
ZH38T0023245	Intron	Verified unannotated TSS	rs60779794	rs185898	1	Platelet distribution width	27863252	Astle WJ
ZH38T0023321	Intron	Verified unannotated TSS	rs79617804	rs7236492	0.72	Inflammatory bowel disease	26192919	Liu JZ
ZH38T0023598	Proximal	Candidate GENCODE TSS	rs3815343	rs10409421	0.93	Blood protein levels	30072576	Emilsson V
ZH38T0023671	TSS	Verified GENCODE TSS	rs3760776	Lead	*	Vitamin B12 levels	22367966	Lin X
ZH38T0023671	TSS	Verified GENCODE TSS	rs778798	Lead	*	Mosquito bite size	28199695	Jones AV
ZH38T0023767	Intron	Verified unannotated TSS	rs58130577	rs6603109	1	Sexual dysfunction (SSRI/SNRI-related)	22445761	Kurose K
ZH38T0023832	Intron	Local transcription	rs7351098	rs2278236	0.82	HDL cholesterol levels	28334899	Spracklen CN
ZH38T0024107	TSS	Verified GENCODE TSS	rs2974750	rs11085824	0.84	Mean corpuscular hemoglobin	19862010	Ganesh SK
ZH38T0024107	TSS	Verified GENCODE TSS	rs2974750	rs56397034	0.8	Mean corpuscular hemoglobin	27863252	Astle WJ
ZH38T0024107	TSS	Verified GENCODE TSS	rs2974750	rs56397034	0.8	Mean corpuscular volume	27863252	Astle WJ
ZH38T0024107	TSS	Verified GENCODE TSS	rs2974750	rs11673346	0.87	Mean corpuscular volume	29403010	Kanai M
ZH38T0024107	TSS	Verified GENCODE TSS	rs2974750	rs11673346	0.87	Mean corpuscular hemoglobin	29403010	Kanai M
ZH38T0024204	Intron	Verified unannotated TSS	rs1978624	rs12461318	0.98	Maximum cranial width	29698431	Roosenboom J
ZH38T0024297	TSS	Verified GENCODE TSS	rs11540855	rs8170	0.9	Epithelial ovarian cancer	25581431	Kuchenbaecker KB
ZH38T0024370	Exon	TSS unannotated transcript	rs7249	Lead	*	Hand grip strength	29691431	Tikkanen E
ZH38T0024382	TSS	Verified GENCODE TSS	rs2303696	rs4808136	0.8	Blood metabolite levels	24816252	Shin SY
ZH38T0024455	Intron	Verified unannotated TSS	rs11667100	rs836901	0.7	Night sleep phenotypes	27126917	Spada J
ZH38T0024491	TSS	Verified GENCODE TSS	rs6511291	rs12972593	0.9	Rosacea symptom severity	29771307	Aponte JL
ZH38T0024491	TSS	Verified GENCODE TSS	rs6511291	Lead	*	Diastolic blood pressure	30224653	Evangelou E
ZH38T0024563	TSS	Verified GENCODE TSS	rs741445	rs7255223	0.72	Educational attainment (MTAG)	30038396	Lee JJ
ZH38T0024567	TSS	Verified GENCODE TSS	rs10402931	Lead	*	Mean corpuscular hemoglobin	27863252	Astle WJ
ZH38T0024567	TSS	Verified GENCODE TSS	rs10405535	rs10402931	0.98	Mean corpuscular hemoglobin	27863252	Astle WJ
ZH38T0024731	Proximal	Verified unannotated TSS	rs2293686	rs12459634	0.97	Blood protein levels	29875488	Sun BB
ZH38T0024731	Proximal	Verified unannotated TSS	rs2293686	rs7260184	1	Blood protein levels	30072576	Emilsson V
ZH38T0024735	TSS	Verified GENCODE TSS	rs3746277	rs12459634	0.97	Blood protein levels	29875488	Sun BB
ZH38T0024735	TSS	Verified GENCODE TSS	rs3746277	rs7260184	1	Blood protein levels	30072576	Emilsson V
ZH38T0024871	TSS	Verified GENCODE TSS	rs2304176	rs8112211	0.88	Blood protein levels	28240269	Suhre K
ZH38T0024871	TSS	Verified GENCODE TSS	rs2304176	Lead	*	Mean platelet volume	27863252	Astle WJ
ZH38T0024871	TSS	Verified GENCODE TSS	rs2304176	rs71354995	0.82	Blood protein levels	29875488	Sun BB
ZH38T0024871	TSS	Verified GENCODE TSS	rs2304176	rs71354995	0.82	Blood protein levels	30072576	Emilsson V
ZH38T0024898	TSS	Verified GENCODE TSS	rs56113315	rs55945853	0.83	Blood protein levels	30072576	Emilsson V
ZH38T0025058	TSS	Verified GENCODE TSS	rs1869710	rs1455434	1	Blood protein levels	28240269	Suhre K
ZH38T0025061	TSS	Verified GENCODE TSS	rs1455434	Lead	*	Blood protein levels	28240269	Suhre K
ZH38T0025064	TSS	Verified GENCODE TSS	rs2233153	rs1455434	0.78	Blood protein levels	28240269	Suhre K
ZH38T0025065	TSS	Verified GENCODE TSS	rs2233154	Lead,rs2230694,rs2233159,rs2607426	*,1,1,0.96	Blood protein levels	28240269	Suhre K
ZH38T0025065	TSS	Verified GENCODE TSS	rs2233154	rs2604877	1	Blood protein levels	29875488	Sun BB
ZH38T0025065	TSS	Verified GENCODE TSS	rs2233154	Lead	*	Blood protein levels	30072576	Emilsson V
ZH38T0025111	TSS	Verified GENCODE TSS	rs10853751	rs284663	0.92	Blood protein levels	30072576	Emilsson V
ZH38T0025115	TSS	Verified GENCODE TSS	rs13344547	rs284663	0.94	Blood protein levels	30072576	Emilsson V
ZH38T0025115	TSS	Verified GENCODE TSS	rs13346603	rs284663	0.95	Blood protein levels	30072576	Emilsson V
ZH38T0025174	Intergenic	Verified unannotated TSS	rs61088131	Lead	*	Prostate cancer (advanced)	29892016	Schumacher FR
ZH38T0025240	Proximal	Verified unannotated TSS	rs12609056	rs346522	1	Mean corpuscular volume	29403010	Kanai M
ZH38T0025241	TSS	Verified GENCODE TSS	rs2277745	rs346522	1	Mean corpuscular volume	29403010	Kanai M
ZH38T0025242	Proximal	TSS unannotated transcript	rs346528	rs346522	1	Mean corpuscular volume	29403010	Kanai M
ZH38T0025302	TSS	Verified GENCODE TSS	rs440446	rs157580	0.71	Alzheimer's disease biomarkers	21123754	Kim S
ZH38T0025305	TSS	Verified GENCODE TSS	rs34954997	Lead,rs438811,rs483082,rs75627662	*,0.94,0.94,0.79	Blood protein levels	29875488	Sun BB
ZH38T0025310	TSS	Verified GENCODE TSS	rs79429216	Lead	*	Blood protein levels	29875488	Sun BB
ZH38T0025395	TSS	Verified GENCODE TSS	rs2072562	rs8102493	0.85	Blood protein levels	29875488	Sun BB
ZH38T0025395	TSS	Verified GENCODE TSS	rs2072562	rs12980641	0.88	Blood protein levels	30072576	Emilsson V
ZH38T0025410	Intron	Verified unannotated TSS	rs62136101	rs4802307	0.96	Crohn's disease	28067908	de Lange KM
ZH38T0025410	Intron	Verified unannotated TSS	rs62136101	rs4802307	0.96	Inflammatory bowel disease	26192919	Liu JZ
ZH38T0025458	Intron	Verified unannotated TSS	rs55731973	rs3810291	0.78	Body mass index	26426971	Winkler TW
ZH38T0025458	Intron	Verified unannotated TSS	rs55731973	rs3810291	0.78	Body mass index	20935630	Speliotes EK
ZH38T0025458	Intron	Verified unannotated TSS	rs55731973	rs3810291	0.86	Body mass index	24861553	Wen W
ZH38T0025458	Intron	Verified unannotated TSS	rs55731973	rs3810291	0.78	Body mass index	26961502	Wood AR
ZH38T0025568	TSS	Verified GENCODE TSS	rs838144	rs380743	0.82	Inflammatory skin disease	25574825	Baurecht H
ZH38T0025568	TSS	Verified GENCODE TSS	rs838144	rs2287921	0.88	Retinal vascular caliber	21060863	Ikram MK
ZH38T0025568	TSS	Verified GENCODE TSS	rs838144	rs838133	0.7	Dietary macronutrient intake	23372041	Chu AY
ZH38T0025568	TSS	Verified GENCODE TSS	rs838144	rs838133	0.7	Homocysteine levels	23824729	van Meurs JB
ZH38T0025568	TSS	Verified GENCODE TSS	rs8106205	rs838147	0.72	Dietary macronutrient intake	23636237	Tanaka T
ZH38T0025568	TSS	Verified GENCODE TSS	rs838144	rs838145,rs838147	0.86,0.99	Dietary macronutrient intake	23636237	Tanaka T
ZH38T0025568	TSS	Verified GENCODE TSS	rs838144	rs2287922	0.88	Mean platelet volume	27863252	Astle WJ
ZH38T0025568	TSS	Verified GENCODE TSS	rs838144	rs838133	0.7	Dietary macronutrient intake	29988085	Merino J
ZH38T0025606	TSS	Verified GENCODE TSS	rs2287755	rs3764618	1	Follicule stimulating hormone	24049095	Chen Z
ZH38T0025606	TSS	Verified GENCODE TSS	rs2287755	rs139643250,rs75287599,rs79785970	0.84,0.84,0.84	Blood protein levels	29875488	Sun BB
ZH38T0025606	TSS	Verified GENCODE TSS	rs2287755	rs79502742	1	Blood protein levels	30072576	Emilsson V
ZH38T0025607	Proximal	Verified unannotated TSS	rs3810176	rs3764618	1	Follicule stimulating hormone	24049095	Chen Z
ZH38T0025607	Proximal	Verified unannotated TSS	rs3810176	rs139643250,rs75287599,rs79785970	0.84,0.84,0.84	Blood protein levels	29875488	Sun BB
ZH38T0025607	Proximal	Verified unannotated TSS	rs3810176	rs79502742	1	Blood protein levels	30072576	Emilsson V
ZH38T0025608	TSS	Verified GENCODE TSS	rs3764617	rs3764618	1	Follicule stimulating hormone	24049095	Chen Z
ZH38T0025608	TSS	Verified GENCODE TSS	rs3764618	Lead	*	Follicule stimulating hormone	24049095	Chen Z
ZH38T0025608	TSS	Verified GENCODE TSS	rs3764617	rs139643250,rs75287599,rs79785970	0.84,0.84,0.84	Blood protein levels	29875488	Sun BB
ZH38T0025608	TSS	Verified GENCODE TSS	rs3764618	rs139643250,rs75287599,rs79785970	0.84,0.84,0.84	Blood protein levels	29875488	Sun BB
ZH38T0025608	TSS	Verified GENCODE TSS	rs3764617	rs79502742	1	Blood protein levels	30072576	Emilsson V
ZH38T0025608	TSS	Verified GENCODE TSS	rs3764618	rs79502742	1	Blood protein levels	30072576	Emilsson V
ZH38T0025698	Proximal	Verified unannotated TSS	rs2304206	rs1045567	0.9	General cognitive ability	29844566	Davies G
ZH38T0025699	TSS	Verified GENCODE TSS	rs2304204	rs1045567	0.9	General cognitive ability	29844566	Davies G
ZH38T0025826	Intron	Verified unannotated TSS	rs17632542	rs62113212	1	Prostate cancer aggressiveness	25939597	Berndt SI
ZH38T0025826	Intron	Verified unannotated TSS	rs1810020	rs2735839	0.95	Prostate-specific antigen levels	23269536	Sun J
ZH38T0025826	Intron	Verified unannotated TSS	rs1810020	rs1058205	0.95	Prostate-specific antigen levels	24919509	Terao C
ZH38T0025826	Intron	Verified unannotated TSS	rs17632542	Lead	*	Prostate-specific antigen levels	28139693	Hoffmann TJ
ZH38T0025826	Intron	Verified unannotated TSS	rs61752561	Lead	*	Prostate-specific antigen levels	28139693	Hoffmann TJ
ZH38T0025833	Intron	Verified unannotated TSS	rs6070	rs1354774	0.79	Prostate-specific antigen levels	23359319	Jin G
ZH38T0025833	Intron	Verified unannotated TSS	rs6070	Lead	*	Prostate-specific antigen levels	28139693	Hoffmann TJ
ZH38T0025834	Intron	Verified unannotated TSS	rs198974	rs1354774	0.8	Prostate-specific antigen levels	23359319	Jin G
ZH38T0025834	Intron	Verified unannotated TSS	rs198975	rs1354774	0.85	Prostate-specific antigen levels	23359319	Jin G
ZH38T0025834	Intron	Verified unannotated TSS	rs198976	rs1354774	0.85	Prostate-specific antigen levels	23359319	Jin G
ZH38T0025834	Intron	Verified unannotated TSS	rs198974	rs6070	0.9	Prostate-specific antigen levels	28139693	Hoffmann TJ
ZH38T0025834	Intron	Verified unannotated TSS	rs198975	rs6070	0.94	Prostate-specific antigen levels	28139693	Hoffmann TJ
ZH38T0025834	Intron	Verified unannotated TSS	rs198976	rs6070	0.94	Prostate-specific antigen levels	28139693	Hoffmann TJ
ZH38T0025842	TSS	Verified GENCODE TSS	rs28384475	rs79324425	0.98	Blood protein levels	29875488	Sun BB
ZH38T0025845	TSS	Verified GENCODE TSS	rs1624358	rs2659067	0.97	Blood protein levels	28240269	Suhre K
ZH38T0025845	TSS	Verified GENCODE TSS	rs1275221	Lead	*	Blood protein levels	29875488	Sun BB
ZH38T0025845	TSS	Verified GENCODE TSS	rs1624358	rs2739419	0.94	Blood protein levels	29875488	Sun BB
ZH38T0025845	TSS	Verified GENCODE TSS	rs1275221	rs1722558	0.9	Blood protein levels	30072576	Emilsson V
ZH38T0025846	TSS	Verified GENCODE TSS	rs34542531	Lead	*	Blood protein levels	29875488	Sun BB
ZH38T0025847	TSS	Verified GENCODE TSS	rs74705037	Lead	*	Blood protein levels	29875488	Sun BB
ZH38T0025871	TSS	Verified GENCODE TSS	rs7249916	rs1878047	0.7	Body mass index	19851299	Johansson A
ZH38T0025872	TSS	Verified GENCODE TSS	rs7249149	rs1878047	0.7	Body mass index	19851299	Johansson A
ZH38T0025894	TSS	Verified GENCODE TSS	rs1551559	rs2124910	0.96	Blood protein levels	28240269	Suhre K
ZH38T0026009	TSS	Verified GENCODE TSS	rs641738	rs626283	0.99	Cirrhosis (alcohol related)	26482880	Buch S
ZH38T0026009	TSS	Verified GENCODE TSS	rs641738	rs8736	0.99	Blood metabolite levels	24816252	Shin SY
ZH38T0026009	TSS	Verified GENCODE TSS	rs641738	rs2576452	0.92	Blood metabolite ratios	24816252	Shin SY
ZH38T0026025	TSS	Verified GENCODE TSS	rs448083	rs386056	0.92	Blood protein levels	29875488	Sun BB
ZH38T0026025	TSS	Verified GENCODE TSS	rs448092	rs386056	0.92	Blood protein levels	29875488	Sun BB
ZH38T0026033	Proximal	Verified unannotated TSS	rs192436652	rs140440467	0.89	Educational attainment (MTAG)	30038396	Lee JJ
ZH38T0026047	TSS	Verified GENCODE TSS	rs111997702	rs199799668	0.9	Blood protein levels	29875488	Sun BB
ZH38T0026047	TSS	Verified GENCODE TSS	rs111997702	rs74345525	0.97	Blood protein levels	30072576	Emilsson V
ZH38T0026052	Intergenic	Verified unannotated TSS	rs71195783	Lead	*	Blood protein levels	29875488	Sun BB
ZH38T0026123	TSS	Verified GENCODE TSS	rs35117389	rs4806666	0.94	Blood protein levels	29875488	Sun BB
ZH38T0026123	TSS	Verified GENCODE TSS	rs35117389	rs35791293	0.9	Blood protein levels	30072576	Emilsson V
ZH38T0026312	TSS	Verified GENCODE TSS	rs7595075	rs11553746,rs17713879	0.98,0.9	Blood protein levels	28240269	Suhre K
ZH38T0026312	TSS	Verified GENCODE TSS	rs7595075	rs58461606	0.98	Blood protein levels	30072576	Emilsson V
ZH38T0026320	Intergenic	TSS unannotated transcript	rs13035713	rs2867125,rs6725549	0.71,0.75	Body mass index	26426971	Winkler TW
ZH38T0026320	Intergenic	TSS unannotated transcript	rs62105307	rs2867125,rs6725549	0.73,0.77	Body mass index	26426971	Winkler TW
ZH38T0026320	Intergenic	TSS unannotated transcript	rs13035713	rs35142762,rs6752706	0.75,0.72	Hand grip strength	29691431	Tikkanen E
ZH38T0026320	Intergenic	TSS unannotated transcript	rs62105307	rs35142762,rs6752706	0.77,0.75	Hand grip strength	29691431	Tikkanen E
ZH38T0026320	Intergenic	TSS unannotated transcript	rs13035713	rs2867125	0.71	Body mass index	20935630	Speliotes EK
ZH38T0026320	Intergenic	TSS unannotated transcript	rs62105307	rs2867125	0.73	Body mass index	20935630	Speliotes EK
ZH38T0026320	Intergenic	TSS unannotated transcript	rs13035713	rs6548238	0.75	Body mass index	19079261	Willer CJ
ZH38T0026320	Intergenic	TSS unannotated transcript	rs62105307	rs6548238	0.77	Body mass index	19079261	Willer CJ
ZH38T0026320	Intergenic	TSS unannotated transcript	rs13035713	rs12463617	0.75	Body mass index	23669352	Graff M
ZH38T0026320	Intergenic	TSS unannotated transcript	rs62105307	rs12463617	0.77	Body mass index	23669352	Graff M
ZH38T0026320	Intergenic	TSS unannotated transcript	rs13035713	rs2903492	0.71	Body mass index	23563607	Berndt SI
ZH38T0026320	Intergenic	TSS unannotated transcript	rs62105307	rs2903492	0.73	Body mass index	23563607	Berndt SI
ZH38T0026320	Intergenic	TSS unannotated transcript	rs13035713	rs73139123	0.74	Body mass index	28270201	Nagy R
ZH38T0026320	Intergenic	TSS unannotated transcript	rs62105307	rs73139123	0.76	Body mass index	28270201	Nagy R
ZH38T0026320	Intergenic	TSS unannotated transcript	rs13035713	rs13021737	0.74	Body mass index	26961502	Wood AR
ZH38T0026320	Intergenic	TSS unannotated transcript	rs62105307	rs13021737	0.76	Body mass index	26961502	Wood AR
ZH38T0026470	Proximal	Verified unannotated TSS	rs77966298	rs76076331	0.9	Educational attainment (MTAG)	30038396	Lee JJ
ZH38T0026470	Proximal	Verified unannotated TSS	rs1734382	rs4669634	0.83	Self-reported math ability	30038396	Lee JJ
ZH38T0026470	Proximal	Verified unannotated TSS	rs2952623	rs4669634	0.83	Self-reported math ability	30038396	Lee JJ
ZH38T0026470	Proximal	Verified unannotated TSS	rs1734382	rs4669634	0.83	Cognitive performance (MTAG)	30038396	Lee JJ
ZH38T0026470	Proximal	Verified unannotated TSS	rs2952623	rs4669634	0.83	Cognitive performance (MTAG)	30038396	Lee JJ
ZH38T0026527	Intron	Local transcription	rs116939292	rs13403179	0.86	Recalcitrant atopic dermatitis	25935106	Kim KW
ZH38T0026527	Intron	Local transcription	rs76323942	rs13403179	0.86	Recalcitrant atopic dermatitis	25935106	Kim KW
ZH38T0026531	Proximal	Verified unannotated TSS	rs151141490	rs13403179	0.75	Recalcitrant atopic dermatitis	25935106	Kim KW
ZH38T0026642	TSS	Verified GENCODE TSS	rs17240441	rs1367117	0.86	Lipid metabolism phenotypes	19936222	Chasman DI
ZH38T0026690	Intron	Verified unannotated TSS	rs9631062	rs6545814	0.82	Body mass index	22344219	Wen W
ZH38T0026690	Intron	Verified unannotated TSS	rs9631062	rs6545814	0.82	Body mass index	24861553	Wen W
ZH38T0026690	Intron	Verified unannotated TSS	rs9631062	rs10182181	0.76	Body mass index	28892062	Akiyama M
ZH38T0026714	Proximal	Verified unannotated TSS	rs4665299	rs28699126	0.85	Mean corpuscular hemoglobin	27863252	Astle WJ
ZH38T0026714	Proximal	Verified unannotated TSS	rs4665299	rs2243834	0.88	Mean corpuscular volume	27863252	Astle WJ
ZH38T0026758	TSS	Verified GENCODE TSS	rs6742004	rs2304681	0.92	Self-reported risk-taking behaviour	30181555	Strawbridge RJ
ZH38T0026804	TSS	Verified GENCODE TSS	rs3749147	rs4666002	0.95	Phospholipid levels (plasma)	22359512	Demirkan A
ZH38T0026805	TSS	Verified GENCODE TSS	rs3749147	rs4666002	0.95	Phospholipid levels (plasma)	22359512	Demirkan A
ZH38T0026973	Intron	Verified unannotated TSS	rs12712530	rs2041840	0.92	Chronic lymphocytic leukemia	24292274	Speedy HE
ZH38T0027179	Intergenic	Verified unannotated TSS	rs4606978	Lead	*	Educational attainment (MTAG)	30038396	Lee JJ
ZH38T0027217	Proximal	Local transcription	rs7573491	rs9808326	0.97	Blood protein levels	30072576	Emilsson V
ZH38T0027307	TSS	Verified GENCODE TSS	rs67574266	rs13031237,rs34695944	0.98,0.98	Rheumatoid arthritis (ACPA-positive)	23143596	Eyre S
ZH38T0027349	TSS	Verified GENCODE TSS	rs1386401	rs10177638	0.72	Self-reported math ability	30038396	Lee JJ
ZH38T0027440	TSS	Verified GENCODE TSS	rs4519508	rs59663815	0.73	General cognitive ability	29844566	Davies G
ZH38T0027449	TSS	Verified GENCODE TSS	rs10048745	rs13426364	0.72	Blood protein levels	30072576	Emilsson V
ZH38T0027589	Proximal	Verified unannotated TSS	rs4547554	rs10206899,rs13538	0.95,0.97	Blood metabolite levels	24816252	Shin SY
ZH38T0027589	Proximal	Verified unannotated TSS	rs4547554	rs13538	0.97	Blood metabolite ratios	24816252	Shin SY
ZH38T0027589	Proximal	Verified unannotated TSS	rs4547554	rs10206899	0.95	Glomerular filtration rate	23535967	Tin A
ZH38T0027589	Proximal	Verified unannotated TSS	rs4547554	rs13538	0.97	Chronic kidney disease	20383146	Kottgen A
ZH38T0027589	Proximal	Verified unannotated TSS	rs4547554	rs6546856	0.73	Educational attainment (MTAG)	30038396	Lee JJ
ZH38T0027589	Proximal	Verified unannotated TSS	rs4547554	rs6726694	0.76	General cognitive ability	29844566	Davies G
ZH38T0027589	Proximal	Verified unannotated TSS	rs4547554	rs6546856	0.73	Cognitive performance (MTAG)	30038396	Lee JJ
ZH38T0027589	Proximal	Verified unannotated TSS	rs4547554	rs1052162,rs13391552,rs6710438	0.76,0.78,0.78	Serum metabolite levels	23093944	Krumsiek J
ZH38T0027762	Exon	TSS unannotated transcript	rs1446668	rs13394343	0.84	Urinary albumin excretion	30220432	Haas ME
ZH38T0027808	TSS	Verified GENCODE TSS	rs111532456	rs72930400	0.83	Blood protein levels	30072576	Emilsson V
ZH38T0028048	TSS	Verified GENCODE TSS	rs13003982	rs13415583	0.96	Type 1 diabetes	25751624	Onengut-Gumuscu S
ZH38T0028093	TSS	Verified GENCODE TSS	rs11123908	rs1558643	0.89	Fibrinogen levels	26561523	de Vries PS
ZH38T0028093	TSS	Verified GENCODE TSS	rs11123908	rs1558643	0.89	Fibrinogen levels	28107422	de Vries PS
ZH38T0028095	Intron	Verified unannotated TSS	rs2234650	rs7588201	0.93	Blood protein levels	30072576	Emilsson V
ZH38T0028104	Intergenic	Verified unannotated TSS	rs10189629	rs9646944	0.72	Blood protein levels	28240269	Suhre K
ZH38T0028245	Intergenic	Verified unannotated TSS	rs11677088	rs6761276	0.94	Blood protein levels	29875488	Sun BB
ZH38T0028245	Intergenic	Verified unannotated TSS	rs11693750	rs6761276	0.93	Blood protein levels	29875488	Sun BB
ZH38T0028245	Intergenic	Verified unannotated TSS	rs11677088	rs11682107	0.91	Blood protein levels	30072576	Emilsson V
ZH38T0028245	Intergenic	Verified unannotated TSS	rs11693750	rs11682107	0.91	Blood protein levels	30072576	Emilsson V
ZH38T0028259	Proximal	Verified unannotated TSS	rs199993536	rs62158170	0.9	Diastolic blood pressure	30224653	Evangelou E
ZH38T0028318	TSS	Verified GENCODE TSS	rs2272053	rs7571822	0.95	Self-reported math ability	30038396	Lee JJ
ZH38T0028330	TSS	Verified GENCODE TSS	rs934722	rs4849845	0.95	Mean platelet volume	27863252	Astle WJ
ZH38T0028368	Intron	Verified unannotated TSS	rs11682128	rs11694743	0.81	Blood protein levels	30072576	Emilsson V
ZH38T0028377	TSS	Verified GENCODE TSS	rs1799810	rs1158867	0.99	Protein C levels	20802025	Tang W
ZH38T0028377	TSS	Verified GENCODE TSS	rs1799810	Lead,rs2069901	*,1	Blood protein levels	30072576	Emilsson V
ZH38T0028635	TSS	Verified GENCODE TSS	rs35240993	rs289828	0.9	Blood protein levels	28240269	Suhre K
ZH38T0028635	TSS	Verified GENCODE TSS	rs35240993	rs289828	0.9	Blood protein levels	29875488	Sun BB
ZH38T0028635	TSS	Verified GENCODE TSS	rs35240993	rs2278089	0.9	Blood protein levels	30072576	Emilsson V
ZH38T0028781	TSS	Verified GENCODE TSS	rs11678980	rs7309	0.72	Cognitive ability (MTAG)	29186694	Lam M
ZH38T0028781	TSS	Verified GENCODE TSS	rs11678980	Lead	*	Educational attainment (MTAG)	30038396	Lee JJ
ZH38T0028781	TSS	Verified GENCODE TSS	rs11678980	Lead	*	Self-reported math ability	30038396	Lee JJ
ZH38T0028781	TSS	Verified GENCODE TSS	rs11678980	rs11884495	0.72	General cognitive ability	29844566	Davies G
ZH38T0028781	TSS	Verified GENCODE TSS	rs11678980	Lead	*	Cognitive performance (MTAG)	30038396	Lee JJ
ZH38T0028803	Intergenic	TSS unannotated transcript	rs10930089	rs6759626,rs9287826	0.73,0.79	General cognitive ability	29844566	Davies G
ZH38T0028815	TSS	Verified GENCODE TSS	rs11903961	rs143000161	0.9	Heschl's gyrus morphology	25130324	Cai DC
ZH38T0028819	Intron	Verified unannotated TSS	rs443916	rs143000161	0.94	Heschl's gyrus morphology	25130324	Cai DC
ZH38T0028903	TSS	Verified GENCODE TSS	rs3749034	rs872123	0.99	General cognitive ability	29844566	Davies G
ZH38T0028903	TSS	Verified GENCODE TSS	rs3749034	rs7557793	0.91	Cognitive performance (MTAG)	30038396	Lee JJ
ZH38T0028971	TSS	Verified GENCODE TSS	rs72915559	rs72915557	0.97	Educational attainment (MTAG)	30038396	Lee JJ
ZH38T0029145	Intron	Local transcription	rs5836990	rs9333290	0.91	Urinary albumin-to-creatinine ratio	26631737	Teumer A
ZH38T0029210	TSS	Verified GENCODE TSS	rs291466	rs291447	0.97	Blood protein levels	30072576	Emilsson V
ZH38T0029284	Intron	Verified unannotated TSS	rs788023	rs699319	1	Major depressive disorder	27479909	Hyde CL
ZH38T0029292	TSS	Verified GENCODE TSS	rs1116734	rs699319	0.79	Major depressive disorder	27479909	Hyde CL
ZH38T0029293	TSS	Verified GENCODE TSS	rs1116734	rs699319	0.79	Major depressive disorder	27479909	Hyde CL
ZH38T0029327	TSS	Verified GENCODE TSS	rs1124639	rs3115423	0.78	General cognitive ability	29844566	Davies G
ZH38T0029334	Proximal	Verified unannotated TSS	rs3739121	rs10931898	0.84	Information processing speed	27046643	Davies G
ZH38T0029334	Proximal	Verified unannotated TSS	rs3739121	rs6435048	0.71	Cognitive performance (MTAG)	30038396	Lee JJ
ZH38T0029336	TSS	Verified GENCODE TSS	rs10931898	Lead	*	Information processing speed	27046643	Davies G
ZH38T0029336	TSS	Verified GENCODE TSS	rs12614621	rs10931898	0.84	Information processing speed	27046643	Davies G
ZH38T0029336	TSS	Verified GENCODE TSS	rs10931898	rs6435048	0.84	Cognitive performance (MTAG)	30038396	Lee JJ
ZH38T0029336	TSS	Verified GENCODE TSS	rs12614621	rs6435048	0.71	Cognitive performance (MTAG)	30038396	Lee JJ
ZH38T0029378	Proximal	Verified unannotated TSS	rs3769823	Lead	*	Basal cell carcinoma	28177523	Lin Y
ZH38T0029378	Proximal	Verified unannotated TSS	rs3769823	Lead	*	Non-melanoma skin cancer	29739929	Visconti A
ZH38T0029417	TSS	Verified GENCODE TSS	rs145741252	rs6725887	0.93	Coronary heart disease	21378990	Schunkert H
ZH38T0029417	TSS	Verified GENCODE TSS	rs149846585	rs6725887	0.96	Coronary heart disease	21378990	Schunkert H
ZH38T0029526	TSS	Verified GENCODE TSS	rs12469767	rs6735154	0.98	Serum metabolite levels	23093944	Krumsiek J
ZH38T0029538	Proximal	Verified unannotated TSS	rs6735267	rs7599312	0.99	Body mass index	26426971	Winkler TW
ZH38T0029538	Proximal	Verified unannotated TSS	rs6735267	rs7599312	1	Body mass index	28892062	Akiyama M
ZH38T0029573	TSS	Verified GENCODE TSS	rs1250259	rs1250258	0.99	Blood protein levels	28240269	Suhre K
ZH38T0029573	TSS	Verified GENCODE TSS	rs1250259	rs1250229	1	LDL cholesterol levels	28334899	Spracklen CN
ZH38T0029573	TSS	Verified GENCODE TSS	rs1250259	Lead	*	Blood protein levels	30072576	Emilsson V
ZH38T0029666	TSS	Verified GENCODE TSS	rs11554825	rs11677953	0.82	Inflammatory bowel disease	26192919	Liu JZ
ZH38T0029666	TSS	Verified GENCODE TSS	rs11554825	rs2382817	0.79	Inflammatory bowel disease	23128233	Jostins L
ZH38T0029667	TSS	Verified GENCODE TSS	rs1877714	rs11677953	0.97	Inflammatory bowel disease	26192919	Liu JZ
ZH38T0029667	TSS	Verified GENCODE TSS	rs1877714	rs2382817	0.99	Inflammatory bowel disease	23128233	Jostins L
ZH38T0029691	TSS	Verified GENCODE TSS	rs500317	rs492400	0.95	Body mass index	26426971	Winkler TW
ZH38T0029691	TSS	Verified GENCODE TSS	rs500422	rs492400	0.91	Body mass index	26426971	Winkler TW
ZH38T0029691	TSS	Verified GENCODE TSS	rs500317	rs2303565,rs7607369	0.76,0.8	Amyotrophic lateral sclerosis	22959728	Ahmeti KB
ZH38T0029691	TSS	Verified GENCODE TSS	rs500422	rs2303565,rs7607369	0.73,0.76	Amyotrophic lateral sclerosis	22959728	Ahmeti KB
ZH38T0029692	TSS	Verified GENCODE TSS	rs524012	rs492400	0.95	Body mass index	26426971	Winkler TW
ZH38T0029692	TSS	Verified GENCODE TSS	rs524902	rs492400	0.95	Body mass index	26426971	Winkler TW
ZH38T0029692	TSS	Verified GENCODE TSS	rs524012	rs2303565,rs7607369	0.76,0.8	Amyotrophic lateral sclerosis	22959728	Ahmeti KB
ZH38T0029692	TSS	Verified GENCODE TSS	rs524902	rs2303565,rs7607369	0.76,0.8	Amyotrophic lateral sclerosis	22959728	Ahmeti KB
ZH38T0029693	TSS	Verified GENCODE TSS	rs526897	rs492400	0.86	Body mass index	26426971	Winkler TW
ZH38T0029693	TSS	Verified GENCODE TSS	rs526897	rs2303565,rs7607369	0.7,0.71	Amyotrophic lateral sclerosis	22959728	Ahmeti KB
ZH38T0029736	TSS	Verified GENCODE TSS	rs11552796	rs939574	0.97	Platelet distribution width	27863252	Astle WJ
ZH38T0029762	Intergenic	Verified unannotated TSS	rs13386459	rs907683	0.72	Resting heart rate	29769521	Ramirez J
ZH38T0029819	TSS	Verified GENCODE TSS	rs3768886	rs11687736	0.84	Educational attainment (MTAG)	30038396	Lee JJ
ZH38T0029871	Intron	Verified unannotated TSS	rs34360232	rs7571826	0.74	Hand grip strength	29691431	Tikkanen E
ZH38T0029872	TSS	Verified GENCODE TSS	rs58826872	rs1044822	0.75	Systolic blood pressure	30224653	Evangelou E
ZH38T0029989	TSS	Verified GENCODE TSS	rs2289477	rs6752107	1	Crohn's disease	28067908	de Lange KM
ZH38T0029989	TSS	Verified GENCODE TSS	rs2289477	rs36001488	0.96	Pediatric autoimmune diseases	26301688	Li YR
ZH38T0029989	TSS	Verified GENCODE TSS	rs2289477	rs12994997	0.99	Inflammatory bowel disease	26192919	Liu JZ
ZH38T0029990	TSS	Verified unannotated TSS	rs3792109	rs6752107	0.95	Crohn's disease	28067908	de Lange KM
ZH38T0029990	TSS	Verified unannotated TSS	rs3792109	rs36001488	0.99	Pediatric autoimmune diseases	26301688	Li YR
ZH38T0029990	TSS	Verified unannotated TSS	rs3792109	rs12994997	0.96	Inflammatory bowel disease	26192919	Liu JZ
ZH38T0030015	TSS	Verified GENCODE TSS	rs11673726	rs13401281	0.9	Total bilirubin levels	29403010	Kanai M
ZH38T0030016	TSS	Verified GENCODE TSS	rs34983651	Lead	*	Blood protein levels	29875488	Sun BB
ZH38T0030092	Proximal	Verified unannotated TSS	rs3754701	rs3754705	0.98	Resting metabolic rate	28476931	Piaggi P
ZH38T0030136	TSS	Verified GENCODE TSS	rs7565704	rs113909935	0.86	Blood protein levels	30072576	Emilsson V
ZH38T0030153	Intron	Verified unannotated TSS	rs6708265	rs6437234	0.93	Blood protein levels	29875488	Sun BB
ZH38T0030272	TSS	Verified GENCODE TSS	rs11697395	rs73076965	1	Mean platelet volume	27863252	Astle WJ
ZH38T0030272	TSS	Verified GENCODE TSS	rs11697395	rs7271240	0.96	Platelet distribution width	27863252	Astle WJ
ZH38T0030356	Proximal	Verified unannotated TSS	rs1999664	rs6084875	0.72	Systemic lupus erythematosus	24871463	Armstrong DL
ZH38T0030525	TSS	Verified GENCODE TSS	rs6132239	rs6046393	0.8	Verbal declarative memory	25648963	Debette S
ZH38T0030562	TSS	Verified GENCODE TSS	rs2277764	rs6048216	0.88	Fasting plasma glucose	25187374	Hwang JY
ZH38T0030562	TSS	Verified GENCODE TSS	rs2277764	rs6048205	0.75	Fasting blood glucose	22581228	Manning AK
ZH38T0030584	TSS	Verified GENCODE TSS	rs5030707	rs911119	0.93	Chronic kidney disease	20383146	Kottgen A
ZH38T0030584	TSS	Verified GENCODE TSS	rs71334202	rs911119	0.91	Chronic kidney disease	20383146	Kottgen A
ZH38T0030584	TSS	Verified GENCODE TSS	rs5030707	rs6036478	0.93	Blood protein levels	28240269	Suhre K
ZH38T0030584	TSS	Verified GENCODE TSS	rs71334202	rs6036478	0.9	Blood protein levels	28240269	Suhre K
ZH38T0030584	TSS	Verified GENCODE TSS	rs5030707	rs12710327	0.76	Blood protein levels	29875488	Sun BB
ZH38T0030584	TSS	Verified GENCODE TSS	rs71334202	rs12710327	0.73	Blood protein levels	29875488	Sun BB
ZH38T0030584	TSS	Verified GENCODE TSS	rs5030707	rs71334202	0.96	Blood protein levels	30072576	Emilsson V
ZH38T0030584	TSS	Verified GENCODE TSS	rs71334202	Lead	*	Blood protein levels	30072576	Emilsson V
ZH38T0030585	TSS	Verified GENCODE TSS	rs6076122	rs6114248	0.9	Blood protein levels	28240269	Suhre K
ZH38T0030585	TSS	Verified GENCODE TSS	rs6076123	rs6114248	0.84	Blood protein levels	28240269	Suhre K
ZH38T0030594	Intergenic	Verified unannotated TSS	rs59765118	Lead	*	Blood protein levels	29875488	Sun BB
ZH38T0030595	TSS	Verified GENCODE TSS	rs227651	rs6138458	0.9	Blood protein levels	28240269	Suhre K
ZH38T0030595	TSS	Verified GENCODE TSS	rs227650	rs227646,rs8125909	0.97,0.89	Blood protein levels	29875488	Sun BB
ZH38T0030595	TSS	Verified GENCODE TSS	rs227652	rs227646,rs8125909	0.97,0.89	Blood protein levels	29875488	Sun BB
ZH38T0030595	TSS	Verified GENCODE TSS	rs227651	rs227618	0.95	Blood protein levels	30072576	Emilsson V
ZH38T0030596	TSS	Verified GENCODE TSS	rs6138456	rs227646,rs8125909	0.87,1	Blood protein levels	29875488	Sun BB
ZH38T0030597	Proximal	TSS unannotated transcript	rs57265446	rs227646,rs8125909	0.83,0.96	Blood protein levels	29875488	Sun BB
ZH38T0030597	Proximal	TSS unannotated transcript	rs6138457	rs227646,rs8125909	0.84,0.97	Blood protein levels	29875488	Sun BB
ZH38T0030664	TSS	Candidate GENCODE TSS	rs6121246	Lead	*	Mean corpuscular hemoglobin	27863252	Astle WJ
ZH38T0030664	TSS	Candidate GENCODE TSS	rs6121246	rs6060987	1	Mean corpuscular volume	27863252	Astle WJ
ZH38T0030797	TSS	Verified GENCODE TSS	rs2295356	rs2425143	0.79	Blood protein levels	28240269	Suhre K
ZH38T0030797	TSS	Verified GENCODE TSS	rs2295356	rs12481228	0.97	Blood protein levels	29875488	Sun BB
ZH38T0030797	TSS	Verified GENCODE TSS	rs2295356	rs6060578	0.91	Blood protein levels	30072576	Emilsson V
ZH38T0030811	Proximal	Verified unannotated TSS	rs2425123	rs11906854	0.86	Migraine - clinic-based	23793025	Anttila V
ZH38T0030812	TSS	Verified GENCODE TSS	rs72096088	rs2425161	0.76	General cognitive ability	29844566	Davies G
ZH38T0030812	TSS	Verified GENCODE TSS	rs72096088	rs6060515	0.8	Cognitive performance (MTAG)	30038396	Lee JJ
ZH38T0030816	Intron	Verified unannotated TSS	rs2425171	rs2425161	0.91	General cognitive ability	29844566	Davies G
ZH38T0030818	Intron	Verified unannotated TSS	rs10565957	rs2425143	0.85	Blood protein levels	28240269	Suhre K
ZH38T0030818	Intron	Verified unannotated TSS	rs10565957	rs6060578	0.74	Blood protein levels	30072576	Emilsson V
ZH38T0030821	Proximal	Verified unannotated TSS	rs35448195	rs2425143	0.86	Blood protein levels	28240269	Suhre K
ZH38T0030821	Proximal	Verified unannotated TSS	rs35448195	rs6060578	0.76	Blood protein levels	30072576	Emilsson V
ZH38T0030910	TSS	Verified GENCODE TSS	rs2232580	rs11086556	0.98	Blood protein levels	29875488	Sun BB
ZH38T0030950	TSS	Verified GENCODE TSS	rs6029636	rs6065311	0.8	LDL cholesterol levels	28334899	Spracklen CN
ZH38T0030950	TSS	Verified GENCODE TSS	rs6029636	rs2235367	0.83	Total cholesterol levels	28334899	Spracklen CN
ZH38T0031008	TSS	Verified GENCODE TSS	rs6031849	rs2284265	0.96	Blood protein levels	30072576	Emilsson V
ZH38T0031018	TSS	Verified GENCODE TSS	rs17333103	rs6032067	0.86	Blood protein levels	28240269	Suhre K
ZH38T0031018	TSS	Verified GENCODE TSS	rs17333103	rs16989763	0.89	Blood protein levels	29875488	Sun BB
ZH38T0031018	TSS	Verified GENCODE TSS	rs17333103	rs6104052	0.85	Blood protein levels	30072576	Emilsson V
ZH38T0031020	TSS	Verified GENCODE TSS	rs2233882	rs6032067	0.94	Blood protein levels	28240269	Suhre K
ZH38T0031020	TSS	Verified GENCODE TSS	rs2233882	rs16989763	0.81	Blood protein levels	29875488	Sun BB
ZH38T0031020	TSS	Verified GENCODE TSS	rs2233882	rs6104052	0.89	Blood protein levels	30072576	Emilsson V
ZH38T0031025	TSS	Verified GENCODE TSS	rs2743317	rs2743334	0.75	Blood protein levels	30072576	Emilsson V
ZH38T0031088	TSS	Verified GENCODE TSS	rs1883832	rs1569723	0.98	Crohn's disease	28067908	de Lange KM
ZH38T0031088	TSS	Verified GENCODE TSS	rs1883832	rs4810485,rs6032662	1,0.98	Rheumatoid arthritis (ACPA-positive)	23143596	Eyre S
ZH38T0031088	TSS	Verified GENCODE TSS	rs1883832	rs6074022	0.95	Inflammatory bowel disease	26192919	Liu JZ
ZH38T0031088	TSS	Verified GENCODE TSS	rs1883832	rs1569723	0.98	Inflammatory bowel disease	23128233	Jostins L
ZH38T0031088	TSS	Verified GENCODE TSS	rs1883832	rs2024568	0.97	Educational attainment (MTAG)	30038396	Lee JJ
ZH38T0031088	TSS	Verified GENCODE TSS	rs1883832	rs2024568	0.97	Cognitive performance (MTAG)	30038396	Lee JJ
ZH38T0031143	Intron	TSS unannotated transcript	rs77120386	rs80346118	0.98	Diastolic blood pressure	28135244	Warren HR
ZH38T0031149	TSS	Verified GENCODE TSS	rs2252259	rs71351958	0.86	Educational attainment (MTAG)	30038396	Lee JJ
ZH38T0031149	TSS	Verified GENCODE TSS	rs2252259	rs2273653	0.83	Depressive symptoms (MTAG)	29292387	Turley P
ZH38T0031149	TSS	Verified GENCODE TSS	rs2252259	rs2075679	0.9	Subjective well-being (MTAG)	29292387	Turley P
ZH38T0031149	TSS	Verified GENCODE TSS	rs2252259	rs2064853	0.8	General cognitive ability	29844566	Davies G
ZH38T0031162	TSS	Verified GENCODE TSS	rs6648	rs381262	0.9	General cognitive ability	29844566	Davies G
ZH38T0031171	TSS	Verified GENCODE TSS	rs180769054	rs11697848	0.87	Systemic lupus erythematosus	24871463	Armstrong DL
ZH38T0031172	Proximal	Verified unannotated TSS	rs56327845	rs11697848	0.87	Systemic lupus erythematosus	24871463	Armstrong DL
ZH38T0031195	Intergenic	Local transcription	rs6512645	Lead	*	Mean corpuscular hemoglobin	27863252	Astle WJ
ZH38T0031195	Intergenic	Local transcription	rs6512645	Lead	*	Mean corpuscular volume	27863252	Astle WJ
ZH38T0031223	TSS	Verified GENCODE TSS	rs13043316	rs2206929	0.93	Hand grip strength	29691431	Tikkanen E
ZH38T0031313	TSS	Verified GENCODE TSS	rs61558260	rs76473307	1	Chronic lymphocytic leukemia	26956414	Berndt SI
ZH38T0031461	TSS	Verified GENCODE TSS	rs8126001	Lead	*	Mean corpuscular volume	27863252	Astle WJ
ZH38T0031601	Proximal	Verified unannotated TSS	rs118115569	rs17001240	0.93	General cognitive ability	29844566	Davies G
ZH38T0031787	TSS	Verified GENCODE TSS	rs61738607	rs62229266	0.76	Mitral valve prolapse	26301497	Dina C
ZH38T0031790	Proximal	Verified unannotated TSS	rs7280136	rs62229266	0.81	Mitral valve prolapse	26301497	Dina C
ZH38T0031790	Proximal	Verified unannotated TSS	rs73370471	rs16993864	0.95	Blood protein levels	29875488	Sun BB
ZH38T0031790	Proximal	Verified unannotated TSS	rs73370471	rs57716069	1	Blood protein levels	30072576	Emilsson V
ZH38T0031797	Proximal	Verified unannotated TSS	rs59149636	rs1028997	0.99	Blood protein levels	29875488	Sun BB
ZH38T0031797	Proximal	Verified unannotated TSS	rs59149636	rs60409141	0.97	Blood protein levels	30072576	Emilsson V
ZH38T0031798	TSS	Verified GENCODE TSS	rs62229372	Lead	*	Diastolic blood pressure	30224653	Evangelou E
ZH38T0031813	Proximal	Verified unannotated TSS	rs2298682	rs1003719	0.7	Eye color traits	20463881	Liu F
ZH38T0031814	TSS	Verified GENCODE TSS	rs2298684	rs1003719	0.7	Eye color traits	20463881	Liu F
ZH38T0031838	TSS	Candidate GENCODE TSS	rs1573271	rs12482324	0.84	Educational attainment (MTAG)	30038396	Lee JJ
ZH38T0031861	TSS	Verified GENCODE TSS	rs13052882	rs1541102	0.84	General cognitive ability	29844566	Davies G
ZH38T0031933	TSS	Verified GENCODE TSS	rs1573413	rs228081	0.82	Educational attainment (MTAG)	30038396	Lee JJ
ZH38T0032218	TSS	Verified GENCODE TSS	rs45465601	rs35934224	0.95	Glaucoma (primary open-angle)	26752265	Bailey JN
ZH38T0032220	Intron	Local transcription	rs3804047	Lead	*	Staphylococcus aureus infection	24847357	Ye Z
ZH38T0032224	Proximal	Verified unannotated TSS	rs740601	rs4680	0.72	Blood metabolite levels	24816252	Shin SY
ZH38T0032224	Proximal	Verified unannotated TSS	rs740601	rs4680	0.72	Serum metabolite levels	23093944	Krumsiek J
ZH38T0032261	TSS	Verified GENCODE TSS	rs117593372	rs139459946	1	Platelet distribution width	27863252	Astle WJ
ZH38T0032378	TSS	Verified GENCODE TSS	rs9624216	Lead	*	Blood protein levels	29875488	Sun BB
ZH38T0032394	Intergenic	TSS unannotated transcript	rs5844574	rs5760120	0.78	Blood protein levels	30072576	Emilsson V
ZH38T0032421	TSS	Verified GENCODE TSS	rs2073398	rs5751901	0.79	Serum metabolite levels	23093944	Krumsiek J
ZH38T0032518	TSS	Verified GENCODE TSS	rs140134	rs737945	0.72	Educational attainment (MTAG)	30038396	Lee JJ
ZH38T0032524	TSS	Verified GENCODE TSS	rs6519802	rs139711323	0.86	Mean corpuscular hemoglobin	27863252	Astle WJ
ZH38T0032524	TSS	Verified GENCODE TSS	rs6519802	rs17647863	0.74	Mean corpuscular volume	27863252	Astle WJ
ZH38T0032550	TSS	Verified GENCODE TSS	rs5753231	Lead	*	Blood protein levels	29875488	Sun BB
ZH38T0032673	Proximal	TSS unannotated transcript	rs5755674	rs138777	0.88	Total cholesterol levels	28334899	Spracklen CN
ZH38T0032674	TSS	Verified GENCODE TSS	rs5755674	rs138777	0.88	Total cholesterol levels	28334899	Spracklen CN
ZH38T0032676	TSS	Verified GENCODE TSS	rs4461	rs138777	0.9	Total cholesterol levels	28334899	Spracklen CN
ZH38T0032774	Intron	Verified unannotated TSS	rs6000754	rs6000762	0.76	Optic disc area	21307088	Khor CC
ZH38T0032774	Intron	Verified unannotated TSS	rs6000755	rs6000762	0.76	Optic disc area	21307088	Khor CC
ZH38T0032774	Intron	Verified unannotated TSS	rs6000754	rs9607469	0.7	Optic disc area	25631615	Springelkamp H
ZH38T0032774	Intron	Verified unannotated TSS	rs6000755	rs9607469	0.7	Optic disc area	25631615	Springelkamp H
ZH38T0032774	Intron	Verified unannotated TSS	rs6000754	rs2092172	0.96	Vertical cup-disc ratio	28073927	Springelkamp H
ZH38T0032774	Intron	Verified unannotated TSS	rs6000755	rs2092172	0.96	Vertical cup-disc ratio	28073927	Springelkamp H
ZH38T0032899	Proximal	Verified unannotated TSS	rs6509	rs137603	0.83	Primary biliary cholangitis	28425483	Qiu F
ZH38T0032901	Intergenic	Verified unannotated TSS	rs137627	rs137603	0.83	Primary biliary cholangitis	28425483	Qiu F
ZH38T0032981	Intron	Local transcription	rs2234052	rs727563	0.71	Inflammatory bowel disease	26192919	Liu JZ
ZH38T0033027	TSS	Verified GENCODE TSS	rs133376	rs2743461	0.76	Educational attainment (MTAG)	30038396	Lee JJ
ZH38T0033027	TSS	Verified GENCODE TSS	rs133376	rs5758605	0.77	General cognitive ability	29844566	Davies G
ZH38T0033027	TSS	Verified GENCODE TSS	rs133376	rs2743461	0.76	Cognitive performance (MTAG)	30038396	Lee JJ
ZH38T0033035	TSS	Verified GENCODE TSS	rs2743461	Lead	*	Educational attainment (MTAG)	30038396	Lee JJ
ZH38T0033035	TSS	Verified GENCODE TSS	rs2743461	rs5758605	0.97	General cognitive ability	29844566	Davies G
ZH38T0033035	TSS	Verified GENCODE TSS	rs2743461	Lead	*	Cognitive performance (MTAG)	30038396	Lee JJ
ZH38T0033050	TSS	TSS unannotated transcript	rs137114	rs137079	0.81	Educational attainment (MTAG)	30038396	Lee JJ
ZH38T0033137	Intron	TSS unannotated transcript	rs28678802	rs28520003	0.7	Self-reported risk-taking behaviour	30181555	Strawbridge RJ
ZH38T0033137	Intron	TSS unannotated transcript	rs28678802	rs28520003	0.7	Self-reported risk-taking behaviour	30271922	Clifton EAD
ZH38T0033241	TSS	Verified GENCODE TSS	rs131806	rs470119	0.95	Mean corpuscular hemoglobin	20139978	Kamatani Y
ZH38T0033241	TSS	Verified GENCODE TSS	rs131806	rs140522	0.89	Mean corpuscular volume	29403010	Kanai M
ZH38T0033241	TSS	Verified GENCODE TSS	rs131806	rs131804	0.99	Mean corpuscular hemoglobin	29403010	Kanai M
ZH38T0033297	Intron	Verified unannotated TSS	rs9836101	rs9858503	1	Self-reported math ability	30038396	Lee JJ
ZH38T0033515	Intron	Verified unannotated TSS	rs9821921	rs2455799	0.79	Mean platelet volume	27863252	Astle WJ
ZH38T0033515	Intron	Verified unannotated TSS	rs9821921	rs13097947	0.87	Platelet distribution width	27863252	Astle WJ
ZH38T0033551	Intergenic	Verified unannotated TSS	rs188064614	rs79638618	0.97	Mean corpuscular volume	29403010	Kanai M
ZH38T0033551	Intergenic	Verified unannotated TSS	rs188064614	rs115792481	0.89	Mean corpuscular hemoglobin	29403010	Kanai M
ZH38T0033671	Intron	Verified unannotated TSS	rs34080384	rs12630931	0.76	Periodontal disease-related phenotypes	24347629	Shaffer JR
ZH38T0033714	Intron	Verified unannotated TSS	rs3890187	rs6550259	0.73	Educational attainment (MTAG)	30038396	Lee JJ
ZH38T0033732	TSS	Candidate GENCODE TSS	rs4647277	rs7631605	0.77	Cerebrospinal P-tau181p levels	20932310	Han MR
ZH38T0033733	Intron	Verified unannotated TSS	rs2286940	rs7631605	0.73	Cerebrospinal P-tau181p levels	20932310	Han MR
ZH38T0033814	TSS	Verified GENCODE TSS	rs7641495	rs67311347	0.81	Renal cell carcinoma	28598434	Scelo G
ZH38T0033817	TSS	Verified GENCODE TSS	rs2276868	rs67311347	0.76	Renal cell carcinoma	28598434	Scelo G
ZH38T0033828	Proximal	Verified unannotated TSS	rs9870255	rs1722846	0.97	Self-reported math ability	30038396	Lee JJ
ZH38T0033828	Proximal	Verified unannotated TSS	rs9870255	rs9813198	0.93	Cognitive performance (MTAG)	30038396	Lee JJ
ZH38T0033835	TSS	TSS unannotated transcript	rs73830583	rs2272007	0.88	Multiple myeloma (hyperdiploidy)	23502783	Weinhold N
ZH38T0033835	TSS	TSS unannotated transcript	rs73830583	rs2272007	0.88	Diastolic blood pressure	27618452	Ehret GB
ZH38T0033850	Proximal	Verified unannotated TSS	rs754635	rs10460960	0.88	Body mass index	28892062	Akiyama M
ZH38T0033852	TSS	Verified GENCODE TSS	rs1799923	rs10460960	0.85	Body mass index	28892062	Akiyama M
ZH38T0034072	Proximal	TSS unannotated transcript	rs9834996	rs13096357	0.72	Cognitive ability (MTAG)	29186694	Lam M
ZH38T0034072	Proximal	TSS unannotated transcript	rs9834996	rs9868809	0.7	Inflammatory bowel disease	26192919	Liu JZ
ZH38T0034072	Proximal	TSS unannotated transcript	rs9834996	rs11715835,rs13063312	0.81,0.71	Blood protein levels	28240269	Suhre K
ZH38T0034072	Proximal	TSS unannotated transcript	rs9834996	rs9848203	0.87	Blood protein levels	29875488	Sun BB
ZH38T0034072	Proximal	TSS unannotated transcript	rs9834996	rs28657585	0.92	General cognitive ability	29844566	Davies G
ZH38T0034082	TSS	Verified GENCODE TSS	rs71324929	rs11713297,rs13094900	0.8,0.74	General cognitive ability	29844566	Davies G
ZH38T0034100	TSS	Verified GENCODE TSS	rs13096406	rs11713297	1	General cognitive ability	29844566	Davies G
ZH38T0034100	TSS	Verified GENCODE TSS	rs34571182	rs11713297	1	General cognitive ability	29844566	Davies G
ZH38T0034104	Proximal	Verified unannotated TSS	rs34006532	rs11713297	0.99	General cognitive ability	29844566	Davies G
ZH38T0034109	TSS	Verified GENCODE TSS	rs1800668	rs4625	0.73	Pediatric autoimmune diseases	26301688	Li YR
ZH38T0034109	TSS	Verified GENCODE TSS	rs1800668	rs11708955	0.7	Blood protein levels	29875488	Sun BB
ZH38T0034109	TSS	Verified GENCODE TSS	rs1800668	rs7646366	0.89	General cognitive ability	29844566	Davies G
ZH38T0034109	TSS	Verified GENCODE TSS	rs1800668	rs7623659	0.99	Cognitive performance (MTAG)	30038396	Lee JJ
ZH38T0034112	TSS	Verified GENCODE TSS	rs940045	rs6790105	0.81	Childhood ear infection	28928442	Tian C
ZH38T0034112	TSS	Verified GENCODE TSS	rs940045	rs4955417	0.74	Depressive symptoms (MTAG)	29292387	Turley P
ZH38T0034123	Proximal	Verified unannotated TSS	rs147997200	Lead	*	Blood protein levels	29875488	Sun BB
ZH38T0034124	Proximal	Verified unannotated TSS	rs147997200	Lead	*	Blood protein levels	29875488	Sun BB
ZH38T0034130	Proximal	Local transcription	rs3811695	rs35365539	0.87	Blood protein levels	28240269	Suhre K
ZH38T0034130	Proximal	Local transcription	rs3811696	rs35365539	0.88	Blood protein levels	28240269	Suhre K
ZH38T0034130	Proximal	Local transcription	rs3811695	rs7618519	0.99	General cognitive ability	29844566	Davies G
ZH38T0034130	Proximal	Local transcription	rs3811696	rs7618519	1	General cognitive ability	29844566	Davies G
ZH38T0034275	TSS	Verified GENCODE TSS	rs4687626	rs2251219	0.82	Major mood disorders	20081856	McMahon FJ
ZH38T0034281	TSS	Verified GENCODE TSS	rs1108842	rs2710323	0.8	Glaucoma (primary open-angle)	25173105	Gharahkhani P
ZH38T0034281	TSS	Verified GENCODE TSS	rs1108842	rs11130319	0.88	Body mass index	28892062	Akiyama M
ZH38T0034281	TSS	Verified GENCODE TSS	rs1108842	rs9879090	0.77	General cognitive ability	29844566	Davies G
ZH38T0034281	TSS	Verified GENCODE TSS	rs1108842	rs2535627	0.71	Blood protein levels	30072576	Emilsson V
ZH38T0034285	TSS	Verified GENCODE TSS	rs6617	rs2251219	0.75	Major mood disorders	20081856	McMahon FJ
ZH38T0034285	TSS	Verified GENCODE TSS	rs6617	rs11130319	0.86	Body mass index	28892062	Akiyama M
ZH38T0034285	TSS	Verified GENCODE TSS	rs6617	rs1042779,rs12493107,rs2019065,rs2286798,rs678	0.71,0.87,0.76,0.7,0.7	Blood protein levels	29875488	Sun BB
ZH38T0034285	TSS	Verified GENCODE TSS	rs6617	rs678	0.7	Blood protein levels	30072576	Emilsson V
ZH38T0034293	TSS	Verified GENCODE TSS	rs2276823	rs2535633	0.94	Body mass index	24861553	Wen W
ZH38T0034334	Proximal	TSS unannotated transcript	rs79600744	rs7653344	0.76	Self-reported math ability	30038396	Lee JJ
ZH38T0034334	Proximal	TSS unannotated transcript	rs79600744	rs7653344	0.76	Cognitive performance (MTAG)	30038396	Lee JJ
ZH38T0034335	TSS	Verified GENCODE TSS	rs73079891	rs7653344	0.76	Self-reported math ability	30038396	Lee JJ
ZH38T0034335	TSS	Verified GENCODE TSS	rs73079891	rs7653344	0.76	Cognitive performance (MTAG)	30038396	Lee JJ
ZH38T0034395	TSS	Verified GENCODE TSS	rs3749290	Lead	*	Blood protein levels	29875488	Sun BB
ZH38T0034395	TSS	Verified GENCODE TSS	rs3749290	rs6807381	1	Blood protein levels	30072576	Emilsson V
ZH38T0034437	TSS	Verified GENCODE TSS	rs114898153	rs62247449	0.98	Educational attainment (MTAG)	30038396	Lee JJ
ZH38T0034598	TSS	Verified GENCODE TSS	rs2290081	rs6792696	0.71	Body mass index	26426971	Winkler TW
ZH38T0034628	TSS	Verified GENCODE TSS	rs6551277	rs4378991	0.7	Mean corpuscular hemoglobin	27863252	Astle WJ
ZH38T0034706	TSS	Verified GENCODE TSS	rs72919417	rs9823506	0.91	Asthma (childhood onset)	23829686	Ding L
ZH38T0034709	TSS	Verified GENCODE TSS	rs9682313	rs11923667	0.95	Diastolic blood pressure	30224653	Evangelou E
ZH38T0034846	TSS	Verified GENCODE TSS	rs2399431	rs2705520	1	Asthma (childhood onset)	23829686	Ding L
ZH38T0034895	Intron	Verified unannotated TSS	rs9826148	rs1882289	0.98	Systolic blood pressure	30224653	Evangelou E
ZH38T0035004	Intron	Local transcription	rs73186060	rs17251221	0.76	Clinical laboratory measurements	27897004	Verma SS
ZH38T0035385	Intergenic	Verified unannotated TSS	rs724016	Lead	*	Crohn's disease	28067908	de Lange KM
ZH38T0035385	Intergenic	Verified unannotated TSS	rs724016	rs7650602	0.83	Educational attainment (MTAG)	30038396	Lee JJ
ZH38T0035389	Intron	Verified unannotated TSS	rs2871960	rs724016	0.95	Crohn's disease	28067908	de Lange KM
ZH38T0035389	Intron	Verified unannotated TSS	rs2871960	rs7650602	0.88	Educational attainment (MTAG)	30038396	Lee JJ
ZH38T0035396	Intron	Local transcription	rs11717842	rs7651511	0.94	Mean corpuscular hemoglobin	27863252	Astle WJ
ZH38T0035483	Intron	Verified unannotated TSS	rs2291671	rs13318853	0.98	Blood protein levels	29875488	Sun BB
ZH38T0035483	Intron	Verified unannotated TSS	rs2291671	rs13318853	0.98	Blood protein levels	30072576	Emilsson V
ZH38T0035599	Intron	Verified unannotated TSS	rs1713798	rs73158427	0.71	Diastolic blood pressure	30224653	Evangelou E
ZH38T0035674	TSS	Verified GENCODE TSS	rs16829118	rs73030851	0.85	Blood protein levels	30072576	Emilsson V
ZH38T0035675	TSS	Verified GENCODE TSS	rs3817373	rs73030851	0.85	Blood protein levels	30072576	Emilsson V
ZH38T0035676	TSS	Verified GENCODE TSS	rs28372852	rs2279561	0.78	Blood protein levels	29875488	Sun BB
ZH38T0035680	Intron	Local transcription	rs112493023	rs7646881	0.98	Tetralogy of Fallot	23297363	Cordell HJ
ZH38T0035680	Intron	Local transcription	rs112493023	Lead,rs61696028	*,0.79	Blood protein levels	29875488	Sun BB
ZH38T0035682	TSS	Verified GENCODE TSS	rs147016103	rs7646881	0.7	Tetralogy of Fallot	23297363	Cordell HJ
ZH38T0035682	TSS	Verified GENCODE TSS	rs7609656	rs7646881	0.87	Tetralogy of Fallot	23297363	Cordell HJ
ZH38T0035682	TSS	Verified GENCODE TSS	rs7609656	rs112493023,rs61696028	0.85,0.74	Blood protein levels	29875488	Sun BB
ZH38T0035725	TSS	Verified GENCODE TSS	rs13060601	rs6441364	0.77	Educational attainment (MTAG)	30038396	Lee JJ
ZH38T0035726	TSS	Verified unannotated TSS	rs13060601	rs6441364	0.77	Educational attainment (MTAG)	30038396	Lee JJ
ZH38T0035728	TSS	Verified GENCODE TSS	rs28384382	rs6441364	0.7	Educational attainment (MTAG)	30038396	Lee JJ
ZH38T0035762	TSS	Verified GENCODE TSS	rs9834676	rs6807306	0.93	Mean platelet volume	27863252	Astle WJ
ZH38T0035790	TSS	Verified GENCODE TSS	rs12637184	rs12696304	0.9	Cutaneous malignant melanoma	26237428	Law MH
ZH38T0035790	TSS	Verified GENCODE TSS	rs12637184	rs10936599	0.81	Chronic lymphocytic leukemia	24292274	Speedy HE
ZH38T0035790	TSS	Verified GENCODE TSS	rs12637184	rs6793295	0.75	Interstitial lung disease	23583980	Fingerlin TE
ZH38T0035790	TSS	Verified GENCODE TSS	rs12637184	rs12638862	0.88	Mean corpuscular volume	29403010	Kanai M
ZH38T0035790	TSS	Verified GENCODE TSS	rs12637184	rs12638862	0.88	Mean corpuscular hemoglobin	29403010	Kanai M
ZH38T0035791	TSS	Verified GENCODE TSS	rs12637184	rs12696304	0.9	Cutaneous malignant melanoma	26237428	Law MH
ZH38T0035791	TSS	Verified GENCODE TSS	rs9811216	rs12696304	0.97	Cutaneous malignant melanoma	26237428	Law MH
ZH38T0035791	TSS	Verified GENCODE TSS	rs12637184	rs10936599	0.81	Chronic lymphocytic leukemia	24292274	Speedy HE
ZH38T0035791	TSS	Verified GENCODE TSS	rs9811216	rs10936599	0.78	Chronic lymphocytic leukemia	24292274	Speedy HE
ZH38T0035791	TSS	Verified GENCODE TSS	rs12637184	rs6793295	0.75	Interstitial lung disease	23583980	Fingerlin TE
ZH38T0035791	TSS	Verified GENCODE TSS	rs9811216	rs6793295	0.82	Interstitial lung disease	23583980	Fingerlin TE
ZH38T0035791	TSS	Verified GENCODE TSS	rs12637184	rs12638862	0.88	Mean corpuscular volume	29403010	Kanai M
ZH38T0035791	TSS	Verified GENCODE TSS	rs12637184	rs12638862	0.88	Mean corpuscular hemoglobin	29403010	Kanai M
ZH38T0035901	TSS	Verified GENCODE TSS	rs7611674	rs7612445	0.81	Resting heart rate	29769521	Ramirez J
ZH38T0035901	TSS	Verified GENCODE TSS	rs7611674	Lead	*	Diastolic blood pressure	30224653	Evangelou E
ZH38T0035966	Proximal	Verified unannotated TSS	rs9869029	rs1401999	0.71	Anterior chamber depth	24603532	Nongpiur ME
ZH38T0036028	TSS	Verified GENCODE TSS	rs17523471	rs13095912	1	Systolic blood pressure	26969751	Parmar PG
ZH38T0036028	TSS	Verified GENCODE TSS	rs17523471	rs12374077	0.97	Diastolic blood pressure	28135244	Warren HR
ZH38T0036042	TSS	Verified GENCODE TSS	rs869400	rs9816226	0.88	Body mass index	20935630	Speliotes EK
ZH38T0036042	TSS	Verified GENCODE TSS	rs869400	rs1516725	0.75	Body mass index	28892062	Akiyama M
ZH38T0036042	TSS	Verified GENCODE TSS	rs869399	rs56940353	0.73	Educational attainment (MTAG)	30038396	Lee JJ
ZH38T0036144	Intergenic	Verified unannotated TSS	rs1007517	rs6791479	0.98	Squamous cell carcinoma	26829030	Asgari MM
ZH38T0036348	TSS	Verified GENCODE TSS	rs80100206	rs75751670	0.98	Educational attainment (MTAG)	30038396	Lee JJ
ZH38T0036348	TSS	Verified GENCODE TSS	rs80100206	rs12646225	0.71	General cognitive ability	29844566	Davies G
ZH38T0036348	TSS	Verified GENCODE TSS	rs80100206	rs75751670	0.98	Cognitive performance (MTAG)	30038396	Lee JJ
ZH38T0036365	Intron	Verified unannotated TSS	rs4974627	rs878323	0.88	Blood protein levels	30072576	Emilsson V
ZH38T0036375	TSS	Verified GENCODE TSS	rs17164589	rs6815464	0.79	Type 2 diabetes	22158537	Cho YS
ZH38T0036375	TSS	Verified GENCODE TSS	rs17164589	rs6815464	0.79	Type 2 diabetes	23945395	Hara K
ZH38T0036385	TSS	Verified GENCODE TSS	rs3134865	rs798766	0.97	Urinary bladder cancer	20348956	Kiemeney LA
ZH38T0036385	TSS	Verified GENCODE TSS	rs3134866	rs798766	0.95	Urinary bladder cancer	20348956	Kiemeney LA
ZH38T0036471	TSS	Verified GENCODE TSS	rs35263598	rs62291616	0.73	Blood protein levels	30072576	Emilsson V
ZH38T0036512	TSS	Candidate GENCODE TSS	rs77191210	Lead	*	Blood protein levels	29875488	Sun BB
ZH38T0036541	TSS	Verified GENCODE TSS	rs3796840	rs3775948	0.84	Uric acid levels	29558500	Lee J
ZH38T0036541	TSS	Verified GENCODE TSS	rs3796840	rs3733589	0.9	Renal overload gout	27899376	Nakayama A
ZH38T0036541	TSS	Verified GENCODE TSS	rs3796840	rs1014290	0.92	Renal underexcretion gout	27899376	Nakayama A
ZH38T0036549	Intergenic	Local transcription	rs4697726	rs59420943	0.71	Uric acid levels	29558500	Lee J
ZH38T0036753	TSS	Verified GENCODE TSS	rs113071828	rs6855993	0.74	Mean corpuscular hemoglobin	27863252	Astle WJ
ZH38T0036874	TSS	Verified GENCODE TSS	rs13151759	rs2055940	0.78	Educational attainment (MTAG)	30038396	Lee JJ
ZH38T0036874	TSS	Verified GENCODE TSS	rs13151769	rs2055940	0.78	Educational attainment (MTAG)	30038396	Lee JJ
ZH38T0036937	TSS	Verified GENCODE TSS	rs3811782	rs2412488	0.92	DNA methylation (variation)	23725790	Renteria ME
ZH38T0036958	Intron	Verified unannotated TSS	rs10028020	rs67388297	0.99	Blood protein levels	30072576	Emilsson V
ZH38T0037003	TSS	Verified GENCODE TSS	rs6852182	rs12645070	0.86	Mean platelet volume	27863252	Astle WJ
ZH38T0037036	Proximal	Verified unannotated TSS	rs77509384	rs74944857	0.71	Educational attainment (MTAG)	30038396	Lee JJ
ZH38T0037036	Proximal	Verified unannotated TSS	rs77509384	rs74944857	0.71	Cognitive performance (MTAG)	30038396	Lee JJ
ZH38T0037203	Proximal	Verified unannotated TSS	rs6819597	rs4356932	0.99	Blood protein levels	28240269	Suhre K
ZH38T0037203	Proximal	Verified unannotated TSS	rs6819597	rs10031452	0.97	Blood protein levels	29875488	Sun BB
ZH38T0037203	Proximal	Verified unannotated TSS	rs6819597	rs4859589	0.96	Blood protein levels	30072576	Emilsson V
ZH38T0037204	Intron	Verified unannotated TSS	rs7376943	rs4356932	0.86	Blood protein levels	28240269	Suhre K
ZH38T0037204	Intron	Verified unannotated TSS	rs7376943	rs10031452	0.85	Blood protein levels	29875488	Sun BB
ZH38T0037204	Intron	Verified unannotated TSS	rs7376943	rs4859589	0.85	Blood protein levels	30072576	Emilsson V
ZH38T0037205	Intron	Verified unannotated TSS	rs13128319	rs4356932	0.93	Blood protein levels	28240269	Suhre K
ZH38T0037205	Intron	Verified unannotated TSS	rs13128319	rs10031452	0.91	Blood protein levels	29875488	Sun BB
ZH38T0037205	Intron	Verified unannotated TSS	rs67308118	rs7693693	0.9	Blood protein levels	29875488	Sun BB
ZH38T0037205	Intron	Verified unannotated TSS	rs13128319	rs4859589	0.9	Blood protein levels	30072576	Emilsson V
ZH38T0037206	Proximal	Verified unannotated TSS	rs28601861	rs7693693	0.93	Blood protein levels	29875488	Sun BB
ZH38T0037206	Proximal	Verified unannotated TSS	rs28647509	rs7693693	0.93	Blood protein levels	29875488	Sun BB
ZH38T0037389	Proximal	Verified unannotated TSS	rs72667727	rs17012216	0.81	Mean corpuscular volume	29403010	Kanai M
ZH38T0037412	TSS	Verified GENCODE TSS	rs1049539	rs6820415	0.86	Blood protein levels	30072576	Emilsson V
ZH38T0037412	TSS	Verified GENCODE TSS	rs1130639	rs6820415	0.86	Blood protein levels	30072576	Emilsson V
ZH38T0037416	Intergenic	TSS unannotated transcript	rs10023686	rs1381949	0.76	Blood protein levels	30072576	Emilsson V
ZH38T0037461	TSS	Verified GENCODE TSS	rs1372518	rs2245801	0.87	Blood protein levels	29875488	Sun BB
ZH38T0037461	TSS	Verified GENCODE TSS	rs1372519	rs2245801	0.88	Blood protein levels	29875488	Sun BB
ZH38T0037461	TSS	Verified GENCODE TSS	rs1372518	Lead,rs2737002	*,0.91	Blood protein levels	30072576	Emilsson V
ZH38T0037461	TSS	Verified GENCODE TSS	rs1372519	rs1372518,rs2737002	0.99,0.91	Blood protein levels	30072576	Emilsson V
ZH38T0037530	TSS	Verified GENCODE TSS	rs1154400	rs1453873	0.79	Blood protein levels	30072576	Emilsson V
ZH38T0037531	TSS	Verified GENCODE TSS	rs1800759	rs2602836	0.79	HDL cholesterol levels	28334899	Spracklen CN
ZH38T0037531	TSS	Verified GENCODE TSS	rs1800759	Lead	*	Blood protein levels	30072576	Emilsson V
ZH38T0037542	TSS	Verified GENCODE TSS	rs34925826	rs17529509	0.7	Blood protein levels	30072576	Emilsson V
ZH38T0037595	TSS	Verified GENCODE TSS	rs4698886	rs6821248	0.76	Chlamydia trachomatis seropositivity	29967566	Roberts CH
ZH38T0037659	TSS	Verified GENCODE TSS	rs11555260	rs2285714	0.95	Age-related macular degeneration	20385819	Chen W
ZH38T0037696	TSS	Verified GENCODE TSS	rs13146963	rs6834538	1	Free thyroxine concentration	24722205	Kwak SH
ZH38T0037776	TSS	Verified GENCODE TSS	rs6857641	rs4834770	1	Blood protein levels	28240269	Suhre K
ZH38T0037815	TSS	Verified GENCODE TSS	rs769236	rs33964027	0.99	Mean corpuscular hemoglobin	27863252	Astle WJ
ZH38T0037815	TSS	Verified GENCODE TSS	rs769236	rs33964027	0.99	Mean corpuscular volume	27863252	Astle WJ
ZH38T0037815	TSS	Verified GENCODE TSS	rs769236	rs13108419	0.79	Mean corpuscular volume	29403010	Kanai M
ZH38T0037816	TSS	Verified GENCODE TSS	rs2271176	rs33964027	0.94	Mean corpuscular hemoglobin	27863252	Astle WJ
ZH38T0037816	TSS	Verified GENCODE TSS	rs2271176	rs33964027	0.94	Mean corpuscular volume	27863252	Astle WJ
ZH38T0037816	TSS	Verified GENCODE TSS	rs2271176	rs13108419	0.76	Mean corpuscular volume	29403010	Kanai M
ZH38T0037857	Intergenic	Local transcription	rs6835782	rs78868369	0.7	Small vessel stroke	29123153	Lee TH
ZH38T0038014	Intron	Verified unannotated TSS	rs1982965	rs1497401	0.99	Platelet distribution width	27863252	Astle WJ
ZH38T0038017	Intron	Verified unannotated TSS	rs7696969	rs1497401	0.95	Platelet distribution width	27863252	Astle WJ
ZH38T0038018	Intron	Local transcription	rs7696969	rs1497401	0.95	Platelet distribution width	27863252	Astle WJ
ZH38T0038047	TSS	Verified GENCODE TSS	rs71590434	rs6857303	0.82	Mean corpuscular hemoglobin	27863252	Astle WJ
ZH38T0038047	TSS	Verified GENCODE TSS	rs71590434	rs6857303	0.82	Mean corpuscular volume	27863252	Astle WJ
ZH38T0038076	TSS	Verified GENCODE TSS	rs34431124	rs1876765	0.7	General cognitive ability	29844566	Davies G
ZH38T0038151	TSS	Verified GENCODE TSS	rs4619875	Lead	*	Blood protein levels	29875488	Sun BB
ZH38T0038192	Intergenic	TSS unannotated transcript	rs1400622	rs4691707	0.99	Systolic blood pressure	27618452	Ehret GB
ZH38T0038228	TSS	Verified GENCODE TSS	rs2070629	rs8396	0.72	Blood metabolite levels	24816252	Shin SY
ZH38T0038228	TSS	Verified GENCODE TSS	rs2070630	rs8396	0.94	Blood metabolite levels	24816252	Shin SY
ZH38T0038228	TSS	Verified GENCODE TSS	rs2070630	rs4690909	0.9	Blood metabolite ratios	24816252	Shin SY
ZH38T0038228	TSS	Verified GENCODE TSS	rs2070629	rs8396	0.72	Blood protein levels	28240269	Suhre K
ZH38T0038228	TSS	Verified GENCODE TSS	rs2070630	rs8396	0.94	Blood protein levels	28240269	Suhre K
ZH38T0038228	TSS	Verified GENCODE TSS	rs2070629	rs8396	0.72	Serum metabolite levels	23093944	Krumsiek J
ZH38T0038228	TSS	Verified GENCODE TSS	rs2070630	rs8396	0.94	Serum metabolite levels	23093944	Krumsiek J
ZH38T0038228	TSS	Verified GENCODE TSS	rs2070630	rs17843966	0.75	Blood protein levels	30072576	Emilsson V
ZH38T0038229	Intron	Verified unannotated TSS	rs35906938	rs2116597,rs4130344	0.71,0.78	General cognitive ability	29844566	Davies G
ZH38T0038326	Proximal	TSS unannotated transcript	rs78685422	rs1904823	0.9	Educational attainment (MTAG)	30038396	Lee JJ
ZH38T0038341	Proximal	Verified unannotated TSS	rs4695826	rs13125240	0.85	Educational attainment (MTAG)	30038396	Lee JJ
ZH38T0038342	TSS	Verified GENCODE TSS	rs3733477	rs13125240	0.88	Educational attainment (MTAG)	30038396	Lee JJ
ZH38T0038472	Intron	Verified unannotated TSS	rs72703518	rs7683537	0.82	Systemic lupus erythematosus	19838195	Gateva V
ZH38T0038599	TSS	TSS unannotated transcript	rs115554641	rs12188164	0.96	Cystic fibrosis severity	21602797	Wright FA
ZH38T0038662	Intergenic	TSS unannotated transcript	rs34338480	rs11951576	0.93	Systemic lupus erythematosus	19838195	Gateva V
ZH38T0038730	TSS	Verified GENCODE TSS	rs183681	rs3853119	0.75	Non-albumin protein levels	29403010	Kanai M
ZH38T0038859	Intron	Verified unannotated TSS	rs253196	rs840390	0.72	Blood protein levels	30072576	Emilsson V
ZH38T0038946	TSS	Verified GENCODE TSS	rs700233	rs11959928	0.78	Chronic kidney disease	20383146	Kottgen A
ZH38T0038947	Intergenic	Verified unannotated TSS	rs7704942	rs700239	0.7	Non-albumin protein levels	29403010	Kanai M
ZH38T0039039	TSS	Verified GENCODE TSS	rs12514393	rs56206275	0.94	Self-reported math ability	30038396	Lee JJ
ZH38T0039039	TSS	Verified GENCODE TSS	rs12514399	rs56206275	0.95	Self-reported math ability	30038396	Lee JJ
ZH38T0039048	Intron	Verified unannotated TSS	rs55641556	rs4242099	0.83	Educational attainment (MTAG)	30038396	Lee JJ
ZH38T0039083	Intergenic	Local transcription	rs16879337	rs16879308	0.75	Migraine without aura	23793025	Anttila V
ZH38T0039171	TSS	Verified GENCODE TSS	rs3211270	rs1848510	0.88	Diastolic blood pressure	30224653	Evangelou E
ZH38T0039209	TSS	Verified GENCODE TSS	rs16878144	rs11746901	0.84	Educational attainment (MTAG)	30038396	Lee JJ
ZH38T0039388	TSS	Verified GENCODE TSS	rs34651	Lead	*	Mean platelet volume	27863252	Astle WJ
ZH38T0039463	TSS	Verified GENCODE TSS	rs7732130	rs6878122	0.98	Type 2 diabetes	22885922	Morris AP
ZH38T0039463	TSS	Verified GENCODE TSS	rs7732130	rs4457053	0.9	Type 2 diabetes	20581827	Voight BF
ZH38T0039577	Intron	TSS unannotated transcript	rs112863682	rs76031687	0.87	General cognitive ability	29844566	Davies G
ZH38T0039590	Proximal	Verified unannotated TSS	rs1846974	rs6893807	0.85	Body mass index	24861553	Wen W
ZH38T0039590	Proximal	Verified unannotated TSS	rs1846974	Lead,rs16903285	*,0.91	Body mass index	28892062	Akiyama M
ZH38T0039590	Proximal	Verified unannotated TSS	rs1846974	rs10514301	0.86	Depressive symptoms (MTAG)	29292387	Turley P
ZH38T0039590	Proximal	Verified unannotated TSS	rs1846974	rs10514301	0.86	Subjective well-being (MTAG)	29292387	Turley P
ZH38T0039590	Proximal	Verified unannotated TSS	rs1846974	rs10514301	0.86	General cognitive ability	29844566	Davies G
ZH38T0039597	Proximal	TSS unannotated transcript	rs153685	rs254779	0.77	Cognitive ability (MTAG)	29186694	Lam M
ZH38T0039597	Proximal	TSS unannotated transcript	rs153685	rs454214	0.77	Major depressive disorder	27479909	Hyde CL
ZH38T0039597	Proximal	TSS unannotated transcript	rs153685	rs34316	0.76	Educational attainment (MTAG)	30038396	Lee JJ
ZH38T0039597	Proximal	TSS unannotated transcript	rs153685	rs640177	0.77	General cognitive ability	29844566	Davies G
ZH38T0039597	Proximal	TSS unannotated transcript	rs153685	rs254781	0.76	Cognitive performance (MTAG)	30038396	Lee JJ
ZH38T0039612	TSS	Verified GENCODE TSS	rs72773828	rs11951031	0.9	Bone mineral density	23572186	Zheng HF
ZH38T0039617	Intergenic	TSS unannotated transcript	rs818947	rs818946	0.96	General cognitive ability	29844566	Davies G
ZH38T0039685	TSS	Verified GENCODE TSS	rs112180629	rs77881626	1	Blood protein levels	29875488	Sun BB
ZH38T0039728	Proximal	Local transcription	rs2617434	rs1363907	0.7	Crohn's disease	28067908	de Lange KM
ZH38T0039728	Proximal	Local transcription	rs2617434	rs1363907	0.7	Inflammatory bowel disease	26192919	Liu JZ
ZH38T0039728	Proximal	Local transcription	rs2617434	rs1363907	0.7	Inflammatory bowel disease	23128233	Jostins L
ZH38T0039728	Proximal	Local transcription	rs2617434	rs2927608	0.76	Blood protein levels	29875488	Sun BB
ZH38T0039728	Proximal	Local transcription	rs2617434	rs1423357	0.71	General cognitive ability	29844566	Davies G
ZH38T0039728	Proximal	Local transcription	rs2617434	rs38033	0.71	Blood protein levels	30072576	Emilsson V
ZH38T0039730	Proximal	Verified unannotated TSS	rs2351010	rs1363907	0.86	Crohn's disease	28067908	de Lange KM
ZH38T0039730	Proximal	Verified unannotated TSS	rs2351010	rs4869313	0.7	Pediatric autoimmune diseases	26301688	Li YR
ZH38T0039730	Proximal	Verified unannotated TSS	rs2351010	rs1363907	0.86	Inflammatory bowel disease	26192919	Liu JZ
ZH38T0039730	Proximal	Verified unannotated TSS	rs2351010	rs1363907	0.86	Inflammatory bowel disease	23128233	Jostins L
ZH38T0039730	Proximal	Verified unannotated TSS	rs2351010	rs2927608	0.86	Blood protein levels	29875488	Sun BB
ZH38T0039730	Proximal	Verified unannotated TSS	rs2351010	rs1423357	0.99	General cognitive ability	29844566	Davies G
ZH38T0039730	Proximal	Verified unannotated TSS	rs2351010	rs38033	1	Blood protein levels	30072576	Emilsson V
ZH38T0039751	TSS	Verified GENCODE TSS	rs145541044	rs55849330	0.94	Systemic lupus erythematosus	29848360	Julia A
ZH38T0039753	Intergenic	TSS unannotated transcript	rs3756354	rs55849330	0.93	Systemic lupus erythematosus	29848360	Julia A
ZH38T0039768	TSS	Verified GENCODE TSS	rs26523	rs257309	0.79	Blood protein levels	29875488	Sun BB
ZH38T0039768	TSS	Verified GENCODE TSS	rs26524	rs257309	0.84	Blood protein levels	29875488	Sun BB
ZH38T0039787	Intron	Local transcription	rs12187753	rs13163062	0.86	Educational attainment (MTAG)	30038396	Lee JJ
ZH38T0039821	TSS	Verified GENCODE TSS	rs2289277	rs3806932	0.95	Eosinophilic esophagitis (pediatric)	20208534	Rothenberg ME
ZH38T0040011	Intron	TSS unannotated transcript	rs10055617	rs892864	0.72	Multiple system atrophy	27629089	Sailer A
ZH38T0040052	TSS	Verified GENCODE TSS	rs113823725	rs11950562	0.8	Blood metabolite levels	24816252	Shin SY
ZH38T0040052	TSS	Verified GENCODE TSS	rs113823725	rs11950562	0.8	Mean platelet volume	27863252	Astle WJ
ZH38T0040052	TSS	Verified GENCODE TSS	rs113823725	rs11955347	0.93	Blood protein levels	29875488	Sun BB
ZH38T0040054	Intergenic	Verified unannotated TSS	rs6878192	rs6864922	0.99	Blood protein levels	30072576	Emilsson V
ZH38T0040061	TSS	Verified GENCODE TSS	rs2631367	rs56399423	0.71	Inflammatory bowel disease	26192919	Liu JZ
ZH38T0040061	TSS	Verified GENCODE TSS	rs2631367	rs11950562	0.87	Blood metabolite levels	24816252	Shin SY
ZH38T0040061	TSS	Verified GENCODE TSS	rs2631367	rs11950562	0.87	Mean platelet volume	27863252	Astle WJ
ZH38T0040070	TSS	Verified GENCODE TSS	rs11242115	rs11741255	0.72	Pediatric autoimmune diseases	26301688	Li YR
ZH38T0040070	TSS	Verified GENCODE TSS	rs11242115	rs736801	0.98	Mosquito bite size	28199695	Jones AV
ZH38T0040074	Intron	Verified unannotated TSS	rs115008099	rs6596086	0.78	Inflammatory skin disease	25574825	Baurecht H
ZH38T0040074	Intron	Verified unannotated TSS	rs115008099	rs6871536	0.87	Asthma (childhood onset)	24241537	Bonnelykke K
ZH38T0040074	Intron	Verified unannotated TSS	rs115008099	rs2078387	0.73	Rosacea symptom severity	29771307	Aponte JL
ZH38T0040082	Intergenic	TSS unannotated transcript	rs59698941	Lead,rs2292030	*,0.98	Apolipoprotein A-IV levels	27412012	Lamina C
ZH38T0040128	TSS	Verified GENCODE TSS	rs6869430	rs329122	0.71	Body mass index	28892062	Akiyama M
ZH38T0040195	TSS	Verified GENCODE TSS	rs7729926	rs2269957	0.95	Educational attainment (MTAG)	30038396	Lee JJ
ZH38T0040196	TSS	Verified GENCODE TSS	rs17171770	rs2269957	0.92	Educational attainment (MTAG)	30038396	Lee JJ
ZH38T0040196	TSS	Verified GENCODE TSS	rs17171772	rs2269957	0.95	Educational attainment (MTAG)	30038396	Lee JJ
ZH38T0040259	TSS	Verified GENCODE TSS	rs3923059	rs3923060	1	Resting-state electroencephalogram vigilance	29703947	Jawinski P
ZH38T0040314	TSS	Verified GENCODE TSS	rs778593	rs2530243	0.84	General cognitive ability	29844566	Davies G
ZH38T0040314	TSS	Verified GENCODE TSS	rs778593	rs2530241	0.89	Cognitive performance (MTAG)	30038396	Lee JJ
ZH38T0040314	TSS	Verified GENCODE TSS	rs778593	rs702395	0.77	Systolic blood pressure	30224653	Evangelou E
ZH38T0040339	TSS	Verified GENCODE TSS	rs4151680	rs3806843	0.94	Major depressive disorder	27479909	Hyde CL
ZH38T0040339	TSS	Verified GENCODE TSS	rs4151680	rs3806843	0.94	Depressive symptoms (MTAG)	29292387	Turley P
ZH38T0040339	TSS	Verified GENCODE TSS	rs4151680	rs13181143	0.94	General cognitive ability	29844566	Davies G
ZH38T0040339	TSS	Verified GENCODE TSS	rs4151680	rs2530241	0.7	Cognitive performance (MTAG)	30038396	Lee JJ
ZH38T0040370	Proximal	Verified unannotated TSS	rs10875595	Lead	*	Pulmonary function decline	22424883	Imboden M
ZH38T0040465	Intron	Verified unannotated TSS	rs12188581	rs7725078	0.76	Educational attainment (MTAG)	30038396	Lee JJ
ZH38T0040499	Intergenic	Verified unannotated TSS	rs4705205	Lead	*	Blood protein levels	30072576	Emilsson V
ZH38T0040512	Intron	Verified unannotated TSS	rs12518996	rs2052536	0.86	Blood protein levels	30072576	Emilsson V
ZH38T0040513	Intron	Verified unannotated TSS	rs17704908	rs2052536	0.86	Blood protein levels	30072576	Emilsson V
ZH38T0040513	Intron	Verified unannotated TSS	rs33920397	rs2052536	0.86	Blood protein levels	30072576	Emilsson V
ZH38T0040514	Intron	Verified unannotated TSS	rs6895434	rs2052536	0.91	Blood protein levels	30072576	Emilsson V
ZH38T0040517	TSS	Verified GENCODE TSS	rs10055415	rs1432688	0.8	Blood protein levels	29875488	Sun BB
ZH38T0040517	TSS	Verified GENCODE TSS	rs10055415	rs10038416	0.88	Blood protein levels	30072576	Emilsson V
ZH38T0040607	Proximal	TSS unannotated transcript	rs7724036	rs11741861	0.87	Crohn's disease	28067908	de Lange KM
ZH38T0040607	Proximal	TSS unannotated transcript	rs7724036	rs17800987	0.93	Inflammatory bowel disease	26192919	Liu JZ
ZH38T0040607	Proximal	TSS unannotated transcript	rs7724036	rs11741861	0.87	Inflammatory bowel disease	23128233	Jostins L
ZH38T0040629	TSS	Verified GENCODE TSS	rs8177833	rs17728338	0.96	Inflammatory skin disease	25574825	Baurecht H
ZH38T0040768	TSS	Verified GENCODE TSS	rs6556405	rs1473247	0.84	Mean platelet volume	19820697	Soranzo N
ZH38T0040768	TSS	Verified GENCODE TSS	rs6556405	rs10076782	0.84	Mean platelet volume	22139419	Gieger C
ZH38T0040768	TSS	Verified GENCODE TSS	rs6556405	rs55801554	0.94	Mean platelet volume	27863252	Astle WJ
ZH38T0040768	TSS	Verified GENCODE TSS	rs6556405	rs2901184	0.95	Platelet distribution width	27863252	Astle WJ
ZH38T0040867	Proximal	Verified unannotated TSS	rs154034	rs29792	0.92	Educational attainment (MTAG)	30038396	Lee JJ
ZH38T0040912	TSS	Verified GENCODE TSS	rs117012610	rs35084382	0.95	Optic cup area	28073927	Springelkamp H
ZH38T0040912	TSS	Verified GENCODE TSS	rs117012610	rs114503346	0.86	Vertical cup-disc ratio	28073927	Springelkamp H
ZH38T0040912	TSS	Verified GENCODE TSS	rs117012610	rs17658229	0.72	Vertical cup-disc ratio	25241763	Springelkamp H
ZH38T0040912	TSS	Verified GENCODE TSS	rs117012610	rs114503346	0.86	Diastolic blood pressure	30224653	Evangelou E
ZH38T0041041	TSS	Verified GENCODE TSS	rs1801020	rs2731672	0.98	Blood metabolite ratios	24816252	Shin SY
ZH38T0041041	TSS	Verified GENCODE TSS	rs1801020	rs2545801	0.98	Blood protein levels	28240269	Suhre K
ZH38T0041041	TSS	Verified GENCODE TSS	rs1801020	Lead,rs2545801,rs2731673,rs2731674,rs75077631	*,0.98,0.99,0.99,0.95	Blood protein levels	29875488	Sun BB
ZH38T0041046	Proximal	Verified unannotated TSS	rs2630766	rs2545795	0.99	Educational attainment (MTAG)	30038396	Lee JJ
ZH38T0041046	Proximal	Verified unannotated TSS	rs2630766	rs2731664	0.85	General cognitive ability	29844566	Davies G
ZH38T0041046	Proximal	Verified unannotated TSS	rs2630766	rs335426	0.77	Cognitive performance (MTAG)	30038396	Lee JJ
ZH38T0041523	TSS	Verified GENCODE TSS	rs141894206	rs78078192	0.86	Plasma trimethyllysine levels	29563342	Li XS
ZH38T0041542	Proximal	TSS unannotated transcript	rs12523665	rs853353	0.8	Educational attainment (MTAG)	30038396	Lee JJ
ZH38T0041643	TSS	TSS unannotated transcript	rs4710971	rs9466056	0.96	Bone mineral density	21533022	Duncan EL
ZH38T0041714	Intron	Verified unannotated TSS	rs6903257	rs34164888	0.85	Mean platelet volume	27863252	Astle WJ
ZH38T0041714	Intron	Verified unannotated TSS	rs6903257	rs6905986	0.73	Platelet distribution width	27863252	Astle WJ
ZH38T0041715	TSS	Verified GENCODE TSS	rs3215471	rs742132	0.82	Uric acid levels	19503597	Kolz M
ZH38T0041717	Intergenic	Local transcription	rs68006638	rs13201341	0.86	General cognitive ability	29844566	Davies G
ZH38T0041734	Proximal	Verified unannotated TSS	rs41266779	rs13201341	0.76	General cognitive ability	29844566	Davies G
ZH38T0041737	TSS	Verified unannotated TSS	rs41266783	rs10484434	1	HIV-1 viral setpoint	22174851	Lingappa JR
ZH38T0041761	TSS	Verified unannotated TSS	rs79868973	rs11758351	0.75	Renal underexcretion gout	27899376	Nakayama A
ZH38T0041762	TSS	Verified unannotated TSS	rs41266801	rs11758351	0.81	Renal underexcretion gout	27899376	Nakayama A
ZH38T0041764	TSS	Verified unannotated TSS	rs41266807	rs11758351	0.81	Renal underexcretion gout	27899376	Nakayama A
ZH38T0041764	TSS	Verified unannotated TSS	rs1059486	rs806795	0.89	Mosquito bite size	28199695	Jones AV
ZH38T0041776	TSS	TSS unannotated transcript	rs3734533	rs11758351	0.81	Renal underexcretion gout	27899376	Nakayama A
ZH38T0041784	TSS	Verified GENCODE TSS	rs2393592	rs34916901	0.99	Hand grip strength	29691431	Tikkanen E
ZH38T0041784	TSS	Verified GENCODE TSS	rs2393593	rs34916901	0.94	Hand grip strength	29691431	Tikkanen E
ZH38T0041784	TSS	Verified GENCODE TSS	rs3999544	rs34916901	0.94	Hand grip strength	29691431	Tikkanen E
ZH38T0041784	TSS	Verified GENCODE TSS	rs2393593	rs766406	0.71	Educational attainment (MTAG)	30038396	Lee JJ
ZH38T0041784	TSS	Verified GENCODE TSS	rs3999544	rs766406	0.71	Educational attainment (MTAG)	30038396	Lee JJ
ZH38T0041785	Proximal	TSS unannotated transcript	rs3999544	rs34916901	0.94	Hand grip strength	29691431	Tikkanen E
ZH38T0041785	Proximal	TSS unannotated transcript	rs3999544	rs766406	0.71	Educational attainment (MTAG)	30038396	Lee JJ
ZH38T0041805	TSS	Verified GENCODE TSS	rs9379899	rs13214027	0.72	General cognitive ability	29844566	Davies G
ZH38T0041826	Intergenic	Local transcription	rs74960761	rs112369919	0.89	Educational attainment (MTAG)	30038396	Lee JJ
ZH38T0041826	Intergenic	Local transcription	rs74960761	rs112369919	0.89	Cognitive performance (MTAG)	30038396	Lee JJ
ZH38T0041834	Intergenic	TSS unannotated transcript	rs10946940	Lead	*	Systemic lupus erythematosus	24871463	Armstrong DL
ZH38T0041855	Proximal	Candidate GENCODE TSS	rs45509595	rs66886492	0.73	General cognitive ability	29844566	Davies G
ZH38T0041866	TSS	Verified GENCODE TSS	rs35902873	rs33932084	0.84	Blood protein levels	28240269	Suhre K
ZH38T0041866	TSS	Verified GENCODE TSS	rs35902873	rs66886492	1	General cognitive ability	29844566	Davies G
ZH38T0041871	TSS	Verified GENCODE TSS	rs34243448	rs33932084	0.98	Blood protein levels	28240269	Suhre K
ZH38T0041871	TSS	Verified GENCODE TSS	rs34243448	rs66886492	0.85	General cognitive ability	29844566	Davies G
ZH38T0041876	TSS	Verified GENCODE TSS	rs2799079	rs9380069	0.79	General cognitive ability	29844566	Davies G
ZH38T0041879	Proximal	TSS unannotated transcript	rs11970439	rs6903823	0.96	Pulmonary function	21946350	Soler Artigas M
ZH38T0041879	Proximal	TSS unannotated transcript	rs11970439	rs7766356	0.71	General cognitive ability	29844566	Davies G
ZH38T0041928	Proximal	Verified unannotated TSS	rs143621629	rs17369215	0.83	Cognitive performance (MTAG)	30038396	Lee JJ
ZH38T0041949	Intergenic	TSS unannotated transcript	rs3903160	rs6904029	0.8	Age-related hearing impairment	24939585	Fransen E
ZH38T0041949	Intergenic	TSS unannotated transcript	rs9357088	rs6904029	0.84	Age-related hearing impairment	24939585	Fransen E
ZH38T0041950	Intron	Verified unannotated TSS	rs4994391	rs1061535	0.94	Childhood ear infection	28928442	Tian C
ZH38T0041951	Proximal	Verified unannotated TSS	rs144821712	rs6917603	0.93	Lipid metabolism phenotypes	22286219	Kettunen J
ZH38T0041952	TSS	Verified unannotated TSS	rs7769930	rs6917603	0.93	Lipid metabolism phenotypes	22286219	Kettunen J
ZH38T0041952	TSS	Verified unannotated TSS	rs7770092	rs6917603	0.93	Lipid metabolism phenotypes	22286219	Kettunen J
ZH38T0041952	TSS	Verified unannotated TSS	rs9295829	rs6904029	0.88	Age-related hearing impairment	24939585	Fransen E
ZH38T0041952	TSS	Verified unannotated TSS	rs1150742	rs2523933	0.78	General cognitive ability	29844566	Davies G
ZH38T0041954	TSS	Verified GENCODE TSS	rs7770557	rs6917603	0.93	Lipid metabolism phenotypes	22286219	Kettunen J
ZH38T0041956	Proximal	Verified unannotated TSS	rs182849717	rs114577328	1	Drug-induced liver injury	28043905	Nicoletti P
ZH38T0041964	TSS	Verified GENCODE TSS	rs9261536	rs6539	0.71	Childhood ear infection	28928442	Tian C
ZH38T0042036	TSS	Verified GENCODE TSS	rs3095152	rs3132580	0.99	Idiopathic membranous nephropathy	21323541	Stanescu HC
ZH38T0042036	TSS	Verified GENCODE TSS	rs3095152	rs1264350,rs3132580	0.87,0.99	Rosacea symptom severity	29771307	Aponte JL
ZH38T0042043	TSS	Verified GENCODE TSS	rs1634714	rs3094084	0.99	Cutaneous lupus erythematosus	25827949	Kunz M
ZH38T0042050	TSS	Verified GENCODE TSS	rs3095318	rs3130564	0.87	Cutaneous lupus erythematosus	25827949	Kunz M
ZH38T0042050	TSS	Verified GENCODE TSS	rs3095318	rs3130564	0.87	Idiopathic membranous nephropathy	21323541	Stanescu HC
ZH38T0042050	TSS	Verified GENCODE TSS	rs2302399	rs3130991	0.99	Blood protein levels	28240269	Suhre K
ZH38T0042050	TSS	Verified GENCODE TSS	rs3095318	rs3130976	0.93	Rosacea symptom severity	29771307	Aponte JL
ZH38T0042053	TSS	Verified GENCODE TSS	rs3130455	rs1265159	0.82	Idiopathic membranous nephropathy	21323541	Stanescu HC
ZH38T0042057	Intergenic	Verified unannotated TSS	rs3095240	rs1265159	0.74	Idiopathic membranous nephropathy	21323541	Stanescu HC
ZH38T0042065	Proximal	Verified unannotated TSS	rs1050428	rs9264845	0.85	Blood protein levels	29875488	Sun BB
ZH38T0042066	TSS	Verified GENCODE TSS	rs9264672	rs9264845	0.85	Blood protein levels	29875488	Sun BB
ZH38T0042070	TSS	Verified GENCODE TSS	rs1050823	rs11753309	0.76	Non-albumin protein levels	29403010	Kanai M
ZH38T0042073	Proximal	Verified unannotated TSS	rs1050529	Lead	*	Basal cell carcinoma	27539887	Chahal HS
ZH38T0042074	TSS	Verified GENCODE TSS	rs34437781	rs9378249	0.8	Mean platelet volume	27863252	Astle WJ
ZH38T0042078	TSS	Verified GENCODE TSS	rs112142209	rs114029601,rs116795853	0.84,1	Blood protein levels	29875488	Sun BB
ZH38T0042085	TSS	Verified GENCODE TSS	rs2239527	rs2071591	0.96	Late-onset myasthenia gravis	26562150	Seldin MF
ZH38T0042090	TSS	Verified GENCODE TSS	rs2071592	rs2071591	0.91	Late-onset myasthenia gravis	26562150	Seldin MF
ZH38T0042092	TSS	Verified GENCODE TSS	rs1800683	rs2071591	0.95	Late-onset myasthenia gravis	26562150	Seldin MF
ZH38T0042124	TSS	Verified GENCODE TSS	rs3117582	rs9267531	1	Cutaneous lupus erythematosus	25827949	Kunz M
ZH38T0042124	TSS	Verified GENCODE TSS	rs3117582	rs3131379	0.98	Systemic lupus erythematosus	18204446	Harley JB
ZH38T0042124	TSS	Verified GENCODE TSS	rs57734195	rs3115663,rs3130618	0.83,0.96	Idiopathic membranous nephropathy	21323541	Stanescu HC
ZH38T0042124	TSS	Verified GENCODE TSS	rs3117582	rs3131379,rs9267531	0.98,1	Systemic lupus erythematosus	26316170	Demirci FY
ZH38T0042124	TSS	Verified GENCODE TSS	rs3117582	rs558702	0.85	Systemic lupus erythematosus	24871463	Armstrong DL
ZH38T0042124	TSS	Verified GENCODE TSS	rs3117582	rs1800628	0.79	Oral cavity cancer	27749845	Lesseur C
ZH38T0042124	TSS	Verified GENCODE TSS	rs3117582	rs3094005	0.7	Blood protein levels	28240269	Suhre K
ZH38T0042124	TSS	Verified GENCODE TSS	rs3117582	rs3130614	0.75	Rosacea symptom severity	29771307	Aponte JL
ZH38T0042124	TSS	Verified GENCODE TSS	rs57734195	rs3132451	0.74	Rosacea symptom severity	29771307	Aponte JL
ZH38T0042124	TSS	Verified GENCODE TSS	rs57734195	rs3132451	0.74	Blood protein levels	29875488	Sun BB
ZH38T0042124	TSS	Verified GENCODE TSS	rs3117582	rs9267488	0.74	General cognitive ability	29844566	Davies G
ZH38T0042131	TSS	Verified GENCODE TSS	rs805258	rs1266078	0.91	Blood protein levels	29875488	Sun BB
ZH38T0042132	TSS	Verified GENCODE TSS	rs28986180	rs28732143	0.74	Blood protein levels	29875488	Sun BB
ZH38T0042135	TSS	Verified GENCODE TSS	rs3749952	rs1266078	0.82	Blood protein levels	29875488	Sun BB
ZH38T0042141	Proximal	Verified unannotated TSS	rs707916	rs707938	0.78	General cognitive ability	29844566	Davies G
ZH38T0042142	TSS	Verified GENCODE TSS	rs9267551	rs3130682	0.75	Mosquito bite size	28199695	Jones AV
ZH38T0042147	TSS	Verified GENCODE TSS	rs3131383	rs9267531	0.98	Cutaneous lupus erythematosus	25827949	Kunz M
ZH38T0042147	TSS	Verified GENCODE TSS	rs3131383	rs3131379	1	Systemic lupus erythematosus	18204446	Harley JB
ZH38T0042147	TSS	Verified GENCODE TSS	rs3131383	rs389884	0.82	Idiopathic membranous nephropathy	21323541	Stanescu HC
ZH38T0042147	TSS	Verified GENCODE TSS	rs3131383	rs1270942	0.8	Systemic lupus erythematosus	26502338	Bentham J
ZH38T0042147	TSS	Verified GENCODE TSS	rs3131383	rs3131379,rs9267531	1,0.98	Systemic lupus erythematosus	26316170	Demirci FY
ZH38T0042147	TSS	Verified GENCODE TSS	rs3131383	rs558702	0.87	Systemic lupus erythematosus	24871463	Armstrong DL
ZH38T0042147	TSS	Verified GENCODE TSS	rs3131383	rs1800628	0.78	Oral cavity cancer	27749845	Lesseur C
ZH38T0042147	TSS	Verified GENCODE TSS	rs3131383	rs3130614,rs519417	0.73,0.85	Rosacea symptom severity	29771307	Aponte JL
ZH38T0042147	TSS	Verified GENCODE TSS	rs3131383	rs519417,rs9267488	0.85,0.72	General cognitive ability	29844566	Davies G
ZH38T0042149	TSS	Verified GENCODE TSS	rs28381344	rs28732143	0.74	Blood protein levels	29875488	Sun BB
ZH38T0042166	TSS	Verified GENCODE TSS	rs41267082	rs2734331	0.81	Blood metabolite levels	24816252	Shin SY
ZH38T0042179	Proximal	Verified unannotated TSS	rs4151667	rs9332739	1	Age-related macular degeneration	21665990	Yu Y
ZH38T0042179	Proximal	Verified unannotated TSS	rs4151667	rs4151669	1	Blood protein levels	28240269	Suhre K
ZH38T0042179	Proximal	Verified unannotated TSS	rs4151667	Lead	*	Blood protein levels	29875488	Sun BB
ZH38T0042179	Proximal	Verified unannotated TSS	rs4151667	rs4151671	1	Blood protein levels	30072576	Emilsson V
ZH38T0042201	TSS	Verified GENCODE TSS	rs3130288	rs389884	0.78	Idiopathic membranous nephropathy	21323541	Stanescu HC
ZH38T0042201	TSS	Verified GENCODE TSS	rs3130288	rs1150757,rs1270942	0.87,0.76	Systemic lupus erythematosus	26502338	Bentham J
ZH38T0042201	TSS	Verified GENCODE TSS	rs3130288	rs1150753	0.89	Systemic lupus erythematosus	26316170	Demirci FY
ZH38T0042201	TSS	Verified GENCODE TSS	rs3130288	rs558702	0.73	Systemic lupus erythematosus	24871463	Armstrong DL
ZH38T0042201	TSS	Verified GENCODE TSS	rs3130288	Lead	*	Sarcoidosis (Lofgren's syndrome)	26651848	Rivera NV
ZH38T0042201	TSS	Verified GENCODE TSS	rs3130288	rs519417	0.75	Rosacea symptom severity	29771307	Aponte JL
ZH38T0042201	TSS	Verified GENCODE TSS	rs3130288	rs519417	0.75	General cognitive ability	29844566	Davies G
ZH38T0042202	TSS	Verified GENCODE TSS	rs9391734	rs12153855	1	Age-related macular degeneration	22694956	Cipriani V
ZH38T0042203	TSS	Verified GENCODE TSS	rs192471087	rs3096697,rs3134945	0.84,0.82	Idiopathic membranous nephropathy	21323541	Stanescu HC
ZH38T0042218	Intron	Verified unannotated TSS	rs3134940	rs3096697,rs3134945	0.81,0.81	Idiopathic membranous nephropathy	21323541	Stanescu HC
ZH38T0042219	TSS	Verified GENCODE TSS	rs1800684	rs3132946	0.83	Interstitial lung disease	23583980	Fingerlin TE
ZH38T0042227	TSS	Verified GENCODE TSS	rs3130319	rs3129939	0.78	Idiopathic membranous nephropathy	21323541	Stanescu HC
ZH38T0042230	TSS	Verified GENCODE TSS	rs14004	rs9268645	0.96	Type 1 diabetes	19430480	Barrett JC
ZH38T0042230	TSS	Verified GENCODE TSS	rs14004	rs4321864	0.75	Staphylococcus aureus infection	26450422	DeLorenze GN
ZH38T0042235	TSS	Verified GENCODE TSS	rs3187964	rs9272346	0.76	Type 1 diabetes	18978792	Cooper JD
ZH38T0042238	TSS	Verified GENCODE TSS	rs1573649	rs2051549	0.74	Systemic lupus erythematosus	23053960	Lee YH
ZH38T0042249	TSS	Verified GENCODE TSS	rs2071480	rs7767288	0.98	Platelet distribution width	27863252	Astle WJ
ZH38T0042252	Intergenic	Verified unannotated TSS	rs3749980	rs10046257,rs10214886,rs1029295,rs1029296,rs11969002,rs3749982,rs6457690,rs6936004,rs7744666,rs9469300	0.93,0.99,1,1,0.97,0.95,0.96,0.99,0.97,0.97	Disc degeneration (lumbar)	22993228	Williams FM
ZH38T0042252	Intergenic	Verified unannotated TSS	rs3749982	Lead,rs10046257,rs10214886,rs1029295,rs1029296,rs11969002,rs6457690,rs6936004,rs7744666,rs9469300	*,0.88,0.93,0.95,0.95,0.97,0.91,0.93,0.97,0.97	Disc degeneration (lumbar)	22993228	Williams FM
ZH38T0042252	Intergenic	Verified unannotated TSS	rs3833670	rs10046257,rs10214886,rs1029295,rs1029296,rs11969002,rs2187689,rs3749982,rs6457690,rs6936004,rs7744666,rs9469300	0.86,0.92,0.93,0.93,0.96,0.7,0.96,0.9,0.92,0.96,0.96	Disc degeneration (lumbar)	22993228	Williams FM
ZH38T0042273	TSS	Verified GENCODE TSS	rs12722013	Lead	*	Blood protein levels	29875488	Sun BB
ZH38T0042277	TSS	Verified GENCODE TSS	rs144092339	Lead	*	Blood protein levels	29875488	Sun BB
ZH38T0042285	TSS	Verified GENCODE TSS	rs150495100	rs35690712	1	Blood protein levels	29875488	Sun BB
ZH38T0042298	TSS	Verified GENCODE TSS	rs463260	rs3130269	0.87	Blood protein levels	29875488	Sun BB
ZH38T0042306	TSS	Verified GENCODE TSS	rs3106189	rs3130269	0.89	Blood protein levels	29875488	Sun BB
ZH38T0042309	TSS	Verified GENCODE TSS	rs2073525	rs3130269	0.95	Blood protein levels	29875488	Sun BB
ZH38T0042324	TSS	Verified GENCODE TSS	rs3216621	rs210142	0.99	Chronic lymphocytic leukemia	22700719	Slager SL
ZH38T0042324	TSS	Verified GENCODE TSS	rs3216621	rs210134	0.87	Chronic lymphocytic leukemia	24292274	Speedy HE
ZH38T0042324	TSS	Verified GENCODE TSS	rs3216621	rs210142	0.99	Chronic lymphocytic leukemia	23770605	Berndt SI
ZH38T0042324	TSS	Verified GENCODE TSS	rs3216621	rs210143	0.94	Chronic lymphocytic leukemia	28165464	Law PJ
ZH38T0042353	TSS	Verified GENCODE TSS	rs72887187	rs185355701	0.73	Alanine transaminase levels	29403010	Kanai M
ZH38T0042354	Proximal	Verified unannotated TSS	rs185355701	Lead	*	Alanine transaminase levels	29403010	Kanai M
ZH38T0042358	Intergenic	TSS unannotated transcript	rs117525671	rs10947487,rs6913361	0.83,0.7	Body mass index	28892062	Akiyama M
ZH38T0042365	Proximal	Verified unannotated TSS	rs9461981	rs206936	0.91	Body mass index	20935630	Speliotes EK
ZH38T0042371	TSS	Verified GENCODE TSS	rs9469779	rs206936	0.87	Body mass index	20935630	Speliotes EK
ZH38T0042383	TSS	Verified GENCODE TSS	rs13215181	rs9469899	0.74	Hand grip strength	29691431	Tikkanen E
ZH38T0042383	TSS	Verified GENCODE TSS	rs6934662	rs9469899	0.71	Hand grip strength	29691431	Tikkanen E
ZH38T0042383	TSS	Verified GENCODE TSS	rs13215181	rs2764208	0.82	Systemic lupus erythematosus	24871463	Armstrong DL
ZH38T0042383	TSS	Verified GENCODE TSS	rs6934662	rs2764208	0.8	Systemic lupus erythematosus	24871463	Armstrong DL
ZH38T0042383	TSS	Verified GENCODE TSS	rs13215181	rs11755393	0.71	Systemic lupus erythematosus	19838195	Gateva V
ZH38T0042383	TSS	Verified GENCODE TSS	rs13215181	rs9469899	0.74	Prostate cancer (advanced)	29892016	Schumacher FR
ZH38T0042383	TSS	Verified GENCODE TSS	rs6934662	rs9469899	0.71	Prostate cancer (advanced)	29892016	Schumacher FR
ZH38T0042385	TSS	Verified GENCODE TSS	rs1051115	rs3734266	1	Systemic lupus erythematosus	23273568	Yang W
ZH38T0042441	Intron	Verified unannotated TSS	rs1107894	rs9380534	0.79	Blood protein levels	29875488	Sun BB
ZH38T0042441	Intron	Verified unannotated TSS	rs1107894	rs9380535	0.79	Blood protein levels	30072576	Emilsson V
ZH38T0042481	TSS	Verified unannotated TSS	rs12194408	Lead	*	Blood protein levels	29875488	Sun BB
ZH38T0042542	TSS	Verified GENCODE TSS	rs13216361	rs2294693	1	Non-cardia gastric cancer	26129866	Hu N
ZH38T0042550	TSS	Verified GENCODE TSS	rs6900025	rs62396317	0.84	Blood protein levels	30072576	Emilsson V
ZH38T0042550	TSS	Verified GENCODE TSS	rs6900152	rs62396317	0.93	Blood protein levels	30072576	Emilsson V
ZH38T0042590	TSS	Verified GENCODE TSS	rs10947995	rs11964516	0.92	Mean corpuscular volume	29403010	Kanai M
ZH38T0042630	TSS	Candidate GENCODE TSS	rs70990160	rs9471987	0.95	Blood protein levels	30072576	Emilsson V
ZH38T0042631	TSS	Verified GENCODE TSS	rs10948059	rs9471987	0.73	Blood protein levels	30072576	Emilsson V
ZH38T0042632	Proximal	Candidate GENCODE TSS	rs9462860	rs9471987	0.98	Blood protein levels	30072576	Emilsson V
ZH38T0042750	TSS	Verified GENCODE TSS	rs7754915	rs1047153	0.92	Blood protein levels	29875488	Sun BB
ZH38T0042750	TSS	Verified GENCODE TSS	rs7754915	rs2223776	0.77	General cognitive ability	29844566	Davies G
ZH38T0042751	TSS	Verified GENCODE TSS	rs3734208	rs1047153	0.91	Blood protein levels	29875488	Sun BB
ZH38T0042751	TSS	Verified GENCODE TSS	rs3734208	rs2223776	0.7	General cognitive ability	29844566	Davies G
ZH38T0042851	Proximal	Verified unannotated TSS	rs62412646	rs16885979	0.74	Daytime sleep phenotypes	27126917	Spada J
ZH38T0042937	TSS	Verified GENCODE TSS	rs9342670	rs9354654	0.7	Classic bladder exstrophy	25763902	Draaken M
ZH38T0043200	TSS	TSS unannotated transcript	rs7770751	rs9398417	0.97	Blood protein levels	29875488	Sun BB
ZH38T0043201	TSS	Verified GENCODE TSS	rs117103160	rs80268500	0.94	Blood protein levels	29875488	Sun BB
ZH38T0043201	TSS	Verified GENCODE TSS	rs7755854	rs9398417	0.87	Blood protein levels	29875488	Sun BB
ZH38T0043204	TSS	Verified GENCODE TSS	rs13210597	rs11759769	0.76	Migraine without aura	23793025	Anttila V
ZH38T0043204	TSS	Verified GENCODE TSS	rs13210597	rs11759769	0.76	Migraine - clinic-based	23793025	Anttila V
ZH38T0043204	TSS	Verified GENCODE TSS	rs13210597	rs2971609	0.76	Cerebral blood flow	28627999	Ikram MA
ZH38T0043331	Intron	Verified unannotated TSS	rs78383792	rs11153147	0.93	Mean corpuscular volume	27863252	Astle WJ
ZH38T0043333	Proximal	Verified unannotated TSS	rs6908184	rs11153147	0.76	Mean corpuscular volume	27863252	Astle WJ
ZH38T0043383	TSS	Verified GENCODE TSS	rs11153277	rs9487605	0.98	Inflammatory skin disease	25574825	Baurecht H
ZH38T0043394	TSS	Verified GENCODE TSS	rs34659678	rs3851228	0.77	Ulcerative colitis	28067908	de Lange KM
ZH38T0043394	TSS	Verified GENCODE TSS	rs34659678	rs2179070	0.93	Inflammatory bowel disease	26192919	Liu JZ
ZH38T0043394	TSS	Verified GENCODE TSS	rs34659678	rs3851228	0.77	Inflammatory bowel disease	23128233	Jostins L
ZH38T0043455	TSS	Verified GENCODE TSS	rs1999929	rs6909746	0.94	LDL cholesterol levels	28334899	Spracklen CN
ZH38T0043455	TSS	Verified GENCODE TSS	rs1999929	rs868943	0.89	Total cholesterol levels	28334899	Spracklen CN
ZH38T0043459	TSS	Candidate GENCODE TSS	rs2232470	rs2252790	0.88	Fast beta electroencephalogram	28040410	Meyers JL
ZH38T0043460	TSS	Verified GENCODE TSS	rs910391	rs2252790	0.9	Fast beta electroencephalogram	28040410	Meyers JL
ZH38T0043489	TSS	Verified GENCODE TSS	rs80196932	rs2498589	0.88	Blood protein levels	29875488	Sun BB
ZH38T0043506	TSS	Verified GENCODE TSS	rs62422236	rs25422	0.72	Renal cell carcinoma	22010048	Wu X
ZH38T0043664	Intron	Verified unannotated TSS	rs9402306	rs6921542	0.91	Mean corpuscular volume	27863252	Astle WJ
ZH38T0043668	Intergenic	Verified unannotated TSS	rs602848	Lead	*	Migraine with aura	23793025	Anttila V
ZH38T0043668	Intergenic	Verified unannotated TSS	rs602848	Lead	*	Migraine - clinic-based	23793025	Anttila V
ZH38T0043786	Intron	Verified unannotated TSS	rs5029924	rs5029939	0.88	Systemic lupus erythematosus	19165918	Graham RR
ZH38T0043786	Intron	Verified unannotated TSS	rs5029924	rs58721818,rs6932056	0.82,0.88	Systemic lupus erythematosus	26502338	Bentham J
ZH38T0043786	Intron	Verified unannotated TSS	rs5029924	rs5029937	1	Systemic lupus erythematosus	19838195	Gateva V
ZH38T0043954	TSS	Verified GENCODE TSS	rs10872646	rs10872645	0.93	Blood protein levels	30072576	Emilsson V
ZH38T0043973	TSS	Verified GENCODE TSS	rs17080102	Lead	*	Diastolic blood pressure	28739976	Wain LV
ZH38T0043973	TSS	Verified GENCODE TSS	rs17080102	Lead	*	Systolic blood pressure	28739976	Wain LV
ZH38T0043973	TSS	Verified GENCODE TSS	rs17080102	rs17080093	0.83	Systolic blood pressure	27618452	Ehret GB
ZH38T0043973	TSS	Verified GENCODE TSS	rs17080102	rs17080093	0.83	Diastolic blood pressure	27618452	Ehret GB
ZH38T0044122	Proximal	Verified unannotated TSS	rs114287805	rs4516970	0.81	Iron status biomarkers	19084217	Benyamin B
ZH38T0044124	Proximal	Verified unannotated TSS	rs56133835	rs4516970	0.96	Iron status biomarkers	19084217	Benyamin B
ZH38T0044124	Proximal	Verified unannotated TSS	rs56749189	rs4516970	0.96	Iron status biomarkers	19084217	Benyamin B
ZH38T0044133	TSS	TSS unannotated transcript	rs555754	rs3127574	0.86	Body mass index	26426971	Winkler TW
ZH38T0044133	TSS	TSS unannotated transcript	rs555754	rs520829	0.91	Lipoprotein (a) levels	28512139	Mack S
ZH38T0044133	TSS	TSS unannotated transcript	rs555754	rs487152	0.97	Body mass index	28892062	Akiyama M
ZH38T0044155	TSS	Verified GENCODE TSS	rs68144677	rs13191362	0.92	Body mass index	26426971	Winkler TW
ZH38T0044195	TSS	Verified GENCODE TSS	rs2247325	rs4710154	0.75	Basal cell carcinoma	27539887	Chahal HS
ZH38T0044247	TSS	TSS unannotated transcript	rs4716383	rs6924023	0.72	Educational attainment (MTAG)	30038396	Lee JJ
ZH38T0044267	TSS	Verified GENCODE TSS	rs12717	rs756519	0.97	Blood protein levels	30072576	Emilsson V
ZH38T0044337	Intron	Verified unannotated TSS	rs11772232	Lead	*	Educational attainment (MTAG)	30038396	Lee JJ
ZH38T0044447	Proximal	Verified unannotated TSS	rs9639027	rs1830074	0.74	Body mass index	26426971	Winkler TW
ZH38T0044525	TSS	Verified GENCODE TSS	rs10215655	rs6977237	0.98	Educational attainment (MTAG)	30038396	Lee JJ
ZH38T0044527	Proximal	Verified unannotated TSS	rs140879246	rs6977237	0.78	Educational attainment (MTAG)	30038396	Lee JJ
ZH38T0044554	TSS	Verified GENCODE TSS	rs696279	Lead	*	Mean platelet volume	27863252	Astle WJ
ZH38T0044638	Intergenic	Verified unannotated TSS	rs183156925	rs74702905	0.78	Serum albumin level	29403010	Kanai M
ZH38T0044638	Intergenic	Verified unannotated TSS	rs59332394	rs74702905	0.9	Serum albumin level	29403010	Kanai M
ZH38T0044639	Intergenic	Verified unannotated TSS	rs4506102	rs74702905	0.73	Serum albumin level	29403010	Kanai M
ZH38T0044651	Intergenic	Local transcription	rs4329182	rs61542988	0.86	Fibrinogen levels	28107422	de Vries PS
ZH38T0044663	TSS	Verified GENCODE TSS	rs858239	rs5850	0.72	Blood protein levels	28240269	Suhre K
ZH38T0044663	TSS	Verified GENCODE TSS	rs858239	rs10250602,rs10262243	0.75,0.81	Blood protein levels	29875488	Sun BB
ZH38T0044663	TSS	Verified GENCODE TSS	rs858239	rs28458177,rs858240	0.8,1	Blood protein levels	30072576	Emilsson V
ZH38T0044732	Proximal	Verified unannotated TSS	rs17323934	rs7804356	0.95	Type 1 diabetes	19430480	Barrett JC
ZH38T0044732	Proximal	Verified unannotated TSS	rs17323934	rs10486483	0.95	Inflammatory bowel disease	26192919	Liu JZ
ZH38T0044732	Proximal	Verified unannotated TSS	rs17323934	rs2030136	0.95	Chronic venous disease	28374850	Ellinghaus E
ZH38T0044860	Proximal	Verified unannotated TSS	rs71534334	rs10951350	0.73	General cognitive ability	29844566	Davies G
ZH38T0044981	Proximal	Candidate GENCODE TSS	rs10263517	rs2877098	0.74	Migraine without aura	23793025	Anttila V
ZH38T0045004	Intergenic	Verified unannotated TSS	rs1181600	rs7802995	0.71	IrriSupplemental Table bowel syndrome	29673008	Bonfiglio F
ZH38T0045037	TSS	Verified GENCODE TSS	rs4440539	rs2908296	0.73	Body mass index	28892062	Akiyama M
ZH38T0045040	TSS	Verified GENCODE TSS	rs1799884	Lead	*	Glycated hemoglobin levels	20858683	Soranzo N
ZH38T0045040	TSS	Verified GENCODE TSS	rs1799884	rs4607517	0.99	Fasting plasma glucose	19060907	Prokopenko I
ZH38T0045040	TSS	Verified GENCODE TSS	rs1799884	rs730497	0.97	Glycated hemoglobin levels	19096518	Pare G
ZH38T0045040	TSS	Verified GENCODE TSS	rs1799884	Lead	*	Glycated hemoglobin levels	24244560	Chen P
ZH38T0045040	TSS	Verified GENCODE TSS	rs1799884	Lead	*	Glycated hemoglobin levels	24647736	Chen P
ZH38T0045040	TSS	Verified GENCODE TSS	rs1799884	rs730497	1	Fasting plasma glucose	25187374	Hwang JY
ZH38T0045040	TSS	Verified GENCODE TSS	rs1799884	rs917793	1	Fasting plasma glucose	28270201	Nagy R
ZH38T0045040	TSS	Verified GENCODE TSS	rs1799884	rs4607517	0.99	Fasting blood glucose	20081858	Dupuis J
ZH38T0045040	TSS	Verified GENCODE TSS	rs1799884	rs4607517	0.99	Fasting blood glucose	22581228	Manning AK
ZH38T0045040	TSS	Verified GENCODE TSS	rs1799884	rs2971669	0.77	Offspring birth weight	29309628	Beaumont RN
ZH38T0045040	TSS	Verified GENCODE TSS	rs1799884	rs6975024	1	Blood sugar levels	29403010	Kanai M
ZH38T0045040	TSS	Verified GENCODE TSS	rs1799884	rs6975024	1	Hemoglobin A1c levels	29403010	Kanai M
ZH38T0045041	Proximal	TSS unannotated transcript	rs1004558	rs1799884	0.99	Glycated hemoglobin levels	20858683	Soranzo N
ZH38T0045041	Proximal	TSS unannotated transcript	rs1004558	rs4607517	0.98	Fasting plasma glucose	19060907	Prokopenko I
ZH38T0045041	Proximal	TSS unannotated transcript	rs1004558	rs730497	0.96	Glycated hemoglobin levels	19096518	Pare G
ZH38T0045041	Proximal	TSS unannotated transcript	rs1004558	rs1799884	0.88	Glycated hemoglobin levels	24244560	Chen P
ZH38T0045041	Proximal	TSS unannotated transcript	rs1004558	rs1799884	0.88	Glycated hemoglobin levels	24647736	Chen P
ZH38T0045041	Proximal	TSS unannotated transcript	rs1004558	rs730497	0.88	Fasting plasma glucose	25187374	Hwang JY
ZH38T0045041	Proximal	TSS unannotated transcript	rs1004558	rs917793	0.99	Fasting plasma glucose	28270201	Nagy R
ZH38T0045041	Proximal	TSS unannotated transcript	rs1004558	rs4607517	0.98	Fasting blood glucose	20081858	Dupuis J
ZH38T0045041	Proximal	TSS unannotated transcript	rs1004558	rs4607517	0.98	Fasting blood glucose	22581228	Manning AK
ZH38T0045041	Proximal	TSS unannotated transcript	rs1004558	rs2971669	0.76	Offspring birth weight	29309628	Beaumont RN
ZH38T0045041	Proximal	TSS unannotated transcript	rs1004558	rs6975024	0.88	Blood sugar levels	29403010	Kanai M
ZH38T0045041	Proximal	TSS unannotated transcript	rs1004558	rs6975024	0.88	Hemoglobin A1c levels	29403010	Kanai M
ZH38T0045046	TSS	Verified GENCODE TSS	rs307007	rs11764171	0.74	Educational attainment (MTAG)	30038396	Lee JJ
ZH38T0045062	Proximal	Verified unannotated TSS	rs757693	rs10267576	0.94	Mean corpuscular volume	27863252	Astle WJ
ZH38T0045062	Proximal	Verified unannotated TSS	rs757693	rs12155039	0.87	Mean platelet volume	27863252	Astle WJ
ZH38T0045311	Proximal	Verified unannotated TSS	rs7793710	rs12539316	0.88	Gamma glutamyl transpeptidase	21909109	Kim YJ
ZH38T0045311	Proximal	Verified unannotated TSS	rs7793710	rs13233571	0.95	HDL cholesterol levels	28334899	Spracklen CN
ZH38T0045316	TSS	Candidate GENCODE TSS	rs61751896	rs73702564	1	Blood protein levels	29875488	Sun BB
ZH38T0045317	TSS	Verified GENCODE TSS	rs113902085	rs73702564	1	Blood protein levels	29875488	Sun BB
ZH38T0045458	Intron	Verified unannotated TSS	rs11768817	rs11974777	0.83	Blood protein levels	30072576	Emilsson V
ZH38T0045459	TSS	Verified GENCODE TSS	rs1194182	rs10499859	0.9	Left ventricular mass	19454037	Arnett DK
ZH38T0045460	Intron	Verified unannotated TSS	rs2366855	rs10499859	0.99	Left ventricular mass	19454037	Arnett DK
ZH38T0045608	TSS	Verified GENCODE TSS	rs4262	rs180239	0.71	Resting heart rate	29769521	Ramirez J
ZH38T0045638	Proximal	Verified unannotated TSS	rs705379	rs757158	0.71	Blood protein levels	28240269	Suhre K
ZH38T0045638	Proximal	Verified unannotated TSS	rs705379	Lead	*	Blood protein levels	29875488	Sun BB
ZH38T0045684	Intron	Verified unannotated TSS	rs9769385	rs982346	0.95	Educational attainment (MTAG)	30038396	Lee JJ
ZH38T0045684	Intron	Verified unannotated TSS	rs9769385	rs982346	0.95	General cognitive ability	29844566	Davies G
ZH38T0045725	Proximal	Verified unannotated TSS	rs10215854	rs11761528	0.86	Dehydroepiandrosterone sulphate levels	21533175	Zhai G
ZH38T0045725	Proximal	Verified unannotated TSS	rs10215854	rs12533251	0.95	Blood metabolite levels	24816252	Shin SY
ZH38T0045725	Proximal	Verified unannotated TSS	rs10215854	rs7809615	0.91	Blood metabolite ratios	24816252	Shin SY
ZH38T0045725	Proximal	Verified unannotated TSS	rs10215854	rs13243267	0.91	Serum metabolite levels	23093944	Krumsiek J
ZH38T0045734	Proximal	Verified unannotated TSS	rs11973801	rs11761528	0.92	Dehydroepiandrosterone sulphate levels	21533175	Zhai G
ZH38T0045734	Proximal	Verified unannotated TSS	rs11973801	rs12533251	0.89	Blood metabolite levels	24816252	Shin SY
ZH38T0045734	Proximal	Verified unannotated TSS	rs11973801	rs7809615	0.97	Blood metabolite ratios	24816252	Shin SY
ZH38T0045734	Proximal	Verified unannotated TSS	rs11973801	rs13243267	0.97	Serum metabolite levels	23093944	Krumsiek J
ZH38T0045739	TSS	Verified GENCODE TSS	rs6947941	rs11761528	0.95	Dehydroepiandrosterone sulphate levels	21533175	Zhai G
ZH38T0045739	TSS	Verified GENCODE TSS	rs6947941	rs12533251	0.86	Blood metabolite levels	24816252	Shin SY
ZH38T0045739	TSS	Verified GENCODE TSS	rs6947941	rs7809615	1	Blood metabolite ratios	24816252	Shin SY
ZH38T0045739	TSS	Verified GENCODE TSS	rs6947941	rs13243267,rs952319	1,0.71	Serum metabolite levels	23093944	Krumsiek J
ZH38T0045750	Intron	Verified unannotated TSS	rs776746	rs10242455	1	Blood metabolite levels	24816252	Shin SY
ZH38T0045750	Intron	Verified unannotated TSS	rs776746	rs10242455	1	Serum metabolite levels	23093944	Krumsiek J
ZH38T0045754	Proximal	Verified unannotated TSS	rs45446698	rs34670419	0.75	Sex hormone levels	26014426	Ruth KS
ZH38T0045754	Proximal	Verified unannotated TSS	rs11568824	rs45446698	0.74	Blood protein levels	29875488	Sun BB
ZH38T0045754	Proximal	Verified unannotated TSS	rs45446698	Lead	*	Blood protein levels	29875488	Sun BB
ZH38T0045803	TSS	Verified GENCODE TSS	rs111312383	rs151288400	0.86	Blood protein levels	29875488	Sun BB
ZH38T0045808	Proximal	Verified unannotated TSS	rs7786844	rs151288400	0.91	Blood protein levels	29875488	Sun BB
ZH38T0045814	TSS	Verified GENCODE TSS	rs10693652	rs76913697	0.92	Platelet distribution width	27863252	Astle WJ
ZH38T0045814	TSS	Verified GENCODE TSS	rs10693652	rs2406253	0.72	Educational attainment (MTAG)	30038396	Lee JJ
ZH38T0045815	TSS	Verified GENCODE TSS	rs10693652	rs76913697	0.92	Platelet distribution width	27863252	Astle WJ
ZH38T0045815	TSS	Verified GENCODE TSS	rs10693652	rs2406253	0.72	Educational attainment (MTAG)	30038396	Lee JJ
ZH38T0045864	TSS	Verified GENCODE TSS	rs17884589	rs12666989,rs314370	0.98,0.86	Resting heart rate	20639392	Eijgelsheim M
ZH38T0045864	TSS	Verified GENCODE TSS	rs17884589	rs17881696	1	Resting heart rate	29769521	Ramirez J
ZH38T0046184	TSS	Verified GENCODE TSS	rs1858830	Lead	*	Blood protein levels	30072576	Emilsson V
ZH38T0046272	Proximal	Candidate GENCODE TSS	rs1557969	rs4731207	0.97	Cutaneous malignant melanoma	26237428	Law MH
ZH38T0046272	Proximal	Candidate GENCODE TSS	rs1557969	rs2267708	0.97	Chronic lymphocytic leukemia	28165464	Law PJ
ZH38T0046556	TSS	Verified GENCODE TSS	rs1860509	rs1011018	0.89	Systolic blood pressure	28135244	Warren HR
ZH38T0046607	Intergenic	TSS unannotated transcript	rs7811859	rs17251	0.81	Alcoholic chronic pancreatitis	28754779	Rosendahl J
ZH38T0046608	Intergenic	TSS unannotated transcript	rs7780142	rs17251	0.81	Alcoholic chronic pancreatitis	28754779	Rosendahl J
ZH38T0046703	TSS	Verified GENCODE TSS	rs13236202	rs10952821	0.86	General cognitive ability	29844566	Davies G
ZH38T0046703	TSS	Verified GENCODE TSS	rs62490575	rs10952821	0.79	General cognitive ability	29844566	Davies G
ZH38T0046716	TSS	Verified GENCODE TSS	rs1962004	rs7806429	0.88	Circulating chemerin levels	25521368	Tonjes A
ZH38T0046716	TSS	Verified GENCODE TSS	rs2159234	rs7806429	0.96	Circulating chemerin levels	25521368	Tonjes A
ZH38T0046716	TSS	Verified GENCODE TSS	rs3735175	rs7806429	0.96	Circulating chemerin levels	25521368	Tonjes A
ZH38T0046716	TSS	Verified GENCODE TSS	rs1962004	rs1047586	0.85	Educational attainment (MTAG)	30038396	Lee JJ
ZH38T0046716	TSS	Verified GENCODE TSS	rs2159234	rs1047586	0.77	Educational attainment (MTAG)	30038396	Lee JJ
ZH38T0046716	TSS	Verified GENCODE TSS	rs3735175	rs1047586	0.77	Educational attainment (MTAG)	30038396	Lee JJ
ZH38T0046716	TSS	Verified GENCODE TSS	rs1962004	rs3735167	0.9	Blood protein levels	30072576	Emilsson V
ZH38T0046716	TSS	Verified GENCODE TSS	rs2159234	rs3735167	0.82	Blood protein levels	30072576	Emilsson V
ZH38T0046716	TSS	Verified GENCODE TSS	rs3735175	rs3735167	0.82	Blood protein levels	30072576	Emilsson V
ZH38T0046717	Proximal	Verified unannotated TSS	rs3735173	rs7806429	0.95	Circulating chemerin levels	25521368	Tonjes A
ZH38T0046717	Proximal	Verified unannotated TSS	rs3735174	rs7806429	0.95	Circulating chemerin levels	25521368	Tonjes A
ZH38T0046717	Proximal	Verified unannotated TSS	rs3735173	rs1047586	0.78	Educational attainment (MTAG)	30038396	Lee JJ
ZH38T0046717	Proximal	Verified unannotated TSS	rs3735174	rs1047586	0.78	Educational attainment (MTAG)	30038396	Lee JJ
ZH38T0046717	Proximal	Verified unannotated TSS	rs3735173	rs3735167	0.83	Blood protein levels	30072576	Emilsson V
ZH38T0046717	Proximal	Verified unannotated TSS	rs3735174	rs3735167	0.83	Blood protein levels	30072576	Emilsson V
ZH38T0046805	Proximal	Local transcription	rs3218382	rs3218477	1	Mean platelet volume	27863252	Astle WJ
ZH38T0046905	Intergenic	Verified unannotated TSS	rs10481354	rs6558530	0.88	Systolic blood pressure	28739976	Wain LV
ZH38T0046905	Intergenic	Verified unannotated TSS	rs10481354	rs4875958	0.73	Systolic blood pressure	30224653	Evangelou E
ZH38T0046907	TSS	Verified GENCODE TSS	rs71499040	rs6558530	0.73	Systolic blood pressure	28739976	Wain LV
ZH38T0046914	Intron	Verified unannotated TSS	rs35670997	rs17685410	0.71	Toenail selenium levels	25343990	Cornelis MC
ZH38T0046936	TSS	Verified GENCODE TSS	rs1800972	rs2702945	0.87	Blood protein levels	29875488	Sun BB
ZH38T0046936	TSS	Verified GENCODE TSS	rs11362	rs2741120	0.96	Blood protein levels	30072576	Emilsson V
ZH38T0046959	TSS	TSS unannotated transcript	rs2288673	rs6993244	0.95	Mean corpuscular hemoglobin	27863252	Astle WJ
ZH38T0046959	TSS	TSS unannotated transcript	rs2288673	rs1964356	0.74	Mean corpuscular volume	27863252	Astle WJ
ZH38T0046970	TSS	Verified GENCODE TSS	rs4841132	rs9987289	1	C-reactive protein levels	21300955	Dehghan A
ZH38T0046970	TSS	Verified GENCODE TSS	rs4841133	rs9987289	1	C-reactive protein levels	21300955	Dehghan A
ZH38T0046970	TSS	Verified GENCODE TSS	rs4841132	rs9987289	1	Plasma lactate levels	26433129	Tin A
ZH38T0046970	TSS	Verified GENCODE TSS	rs4841133	rs9987289	1	Plasma lactate levels	26433129	Tin A
ZH38T0046970	TSS	Verified GENCODE TSS	rs4841132	rs4240624	1	HDL cholesterol levels	28334899	Spracklen CN
ZH38T0046970	TSS	Verified GENCODE TSS	rs4841133	rs4240624	1	HDL cholesterol levels	28334899	Spracklen CN
ZH38T0046970	TSS	Verified GENCODE TSS	rs4841132	rs9987289	1	LDL cholesterol levels	28334899	Spracklen CN
ZH38T0046970	TSS	Verified GENCODE TSS	rs4841133	rs9987289	1	LDL cholesterol levels	28334899	Spracklen CN
ZH38T0046970	TSS	Verified GENCODE TSS	rs4841132	rs9987289	1	Total cholesterol levels	28334899	Spracklen CN
ZH38T0046970	TSS	Verified GENCODE TSS	rs4841133	rs9987289	1	Total cholesterol levels	28334899	Spracklen CN
ZH38T0046970	TSS	Verified GENCODE TSS	rs4841132	Lead	*	Fasting blood insulin	22581228	Manning AK
ZH38T0046970	TSS	Verified GENCODE TSS	rs4841133	rs4841132	1	Fasting blood insulin	22581228	Manning AK
ZH38T0046970	TSS	Verified GENCODE TSS	rs4841132	Lead	*	Fasting blood glucose	22581228	Manning AK
ZH38T0046970	TSS	Verified GENCODE TSS	rs4841133	rs4841132	1	Fasting blood glucose	22581228	Manning AK
ZH38T0047009	TSS	Verified GENCODE TSS	rs13256690	rs2254546	0.92	Systemic lupus erythematosus	23273568	Yang W
ZH38T0047009	TSS	Verified GENCODE TSS	rs1531577	rs2254546	0.92	Systemic lupus erythematosus	23273568	Yang W
ZH38T0047009	TSS	Verified GENCODE TSS	rs13256690	rs7812879	0.98	Systemic lupus erythematosus	19838193	Han JW
ZH38T0047009	TSS	Verified GENCODE TSS	rs1531577	rs7812879	0.99	Systemic lupus erythematosus	19838193	Han JW
ZH38T0047009	TSS	Verified GENCODE TSS	rs13256690	rs2736345	0.91	Systemic lupus erythematosus	26663301	Lessard CJ
ZH38T0047009	TSS	Verified GENCODE TSS	rs1531577	rs2736345	0.92	Systemic lupus erythematosus	26663301	Lessard CJ
ZH38T0047009	TSS	Verified GENCODE TSS	rs13256690	rs2409780	0.83	Non-albumin protein levels	29403010	Kanai M
ZH38T0047009	TSS	Verified GENCODE TSS	rs1531577	rs2409780	0.82	Non-albumin protein levels	29403010	Kanai M
ZH38T0047013	TSS	Verified GENCODE TSS	rs922483	rs13277113	0.83	Systemic lupus erythematosus	18204098	Hom G
ZH38T0047013	TSS	Verified GENCODE TSS	rs922483	rs2618476	0.79	Systemic lupus erythematosus	19165918	Graham RR
ZH38T0047013	TSS	Verified GENCODE TSS	rs922483	rs2736340	0.81	Systemic lupus erythematosus	21408207	Chung SA
ZH38T0047013	TSS	Verified GENCODE TSS	rs922483	rs2736332,rs2736340	0.76,0.81	Systemic lupus erythematosus	26502338	Bentham J
ZH38T0047013	TSS	Verified GENCODE TSS	rs922483	rs13277113	0.83	Systemic lupus erythematosus	23053960	Lee YH
ZH38T0047013	TSS	Verified GENCODE TSS	rs922483	rs2254546	0.94	Systemic lupus erythematosus	23273568	Yang W
ZH38T0047013	TSS	Verified GENCODE TSS	rs922483	rs7812879	0.87	Systemic lupus erythematosus	19838193	Han JW
ZH38T0047013	TSS	Verified GENCODE TSS	rs922483	rs2736345	0.96	Systemic lupus erythematosus	26663301	Lessard CJ
ZH38T0047013	TSS	Verified GENCODE TSS	rs922483	rs2736340	0.81	Systemic lupus erythematosus	19838195	Gateva V
ZH38T0047013	TSS	Verified GENCODE TSS	rs922483	rs2409780	0.79	Non-albumin protein levels	29403010	Kanai M
ZH38T0047019	TSS	Verified GENCODE TSS	rs8191518	rs804279	0.72	Polycystic ovary syndrome	26284813	Hayes MG
ZH38T0047048	Proximal	Verified unannotated TSS	rs76070208	rs76552497	0.83	Educational attainment (MTAG)	30038396	Lee JJ
ZH38T0047235	TSS	Verified GENCODE TSS	rs11135695	rs78905543	0.97	Mean corpuscular volume	27863252	Astle WJ
ZH38T0047243	Proximal	Verified unannotated TSS	rs13278062	Lead	*	Age-related macular degeneration	21909106	Arakawa S
ZH38T0047429	TSS	Verified GENCODE TSS	rs2732317	Lead	*	Blood protein levels	29875488	Sun BB
ZH38T0047429	TSS	Verified GENCODE TSS	rs2732318	rs2732317	1	Blood protein levels	29875488	Sun BB
ZH38T0047429	TSS	Verified GENCODE TSS	rs2732317	rs10094645	0.81	Blood protein levels	30072576	Emilsson V
ZH38T0047429	TSS	Verified GENCODE TSS	rs2732318	rs10094645	0.81	Blood protein levels	30072576	Emilsson V
ZH38T0047435	TSS	TSS unannotated transcript	rs2581896	rs2732317	0.71	Blood protein levels	29875488	Sun BB
ZH38T0047435	TSS	TSS unannotated transcript	rs2581896	rs10094645	0.72	Blood protein levels	30072576	Emilsson V
ZH38T0047480	TSS	Verified GENCODE TSS	rs2270376	rs1906672	0.72	Systolic blood pressure	30224653	Evangelou E
ZH38T0047482	TSS	Verified GENCODE TSS	rs55962869	rs1906672	0.72	Systolic blood pressure	30224653	Evangelou E
ZH38T0047493	Exon	Verified unannotated TSS	rs60558877	rs1906672	0.83	Systolic blood pressure	30224653	Evangelou E
ZH38T0047553	Intron	Verified unannotated TSS	rs9694034	rs516946	0.95	Type 2 diabetes	22885922	Morris AP
ZH38T0047573	TSS	Verified GENCODE TSS	rs2923444	rs2923427	0.81	Mean corpuscular volume	27863252	Astle WJ
ZH38T0047573	TSS	Verified GENCODE TSS	rs2923444	rs9643888	0.7	Educational attainment (MTAG)	30038396	Lee JJ
ZH38T0047637	TSS	Verified GENCODE TSS	rs6983929	rs10504073	0.95	Blood metabolite ratios	24816252	Shin SY
ZH38T0047655	Intron	TSS unannotated transcript	rs10448048	Lead	*	Educational attainment (MTAG)	30038396	Lee JJ
ZH38T0047705	TSS	Verified GENCODE TSS	rs6989630	rs11990963	0.97	Blood protein levels	29875488	Sun BB
ZH38T0047748	TSS	Verified GENCODE TSS	rs13439225	rs112760834	0.95	Blood protein levels	29875488	Sun BB
ZH38T0048010	TSS	Verified GENCODE TSS	rs2072696	Lead	*	Blood protein levels	29875488	Sun BB
ZH38T0048010	TSS	Verified GENCODE TSS	rs2072696	rs10504813	0.91	Blood protein levels	30072576	Emilsson V
ZH38T0048053	Proximal	TSS unannotated transcript	rs2740792	rs2740795	0.73	Educational attainment (MTAG)	30038396	Lee JJ
ZH38T0048065	Intergenic	Local transcription	rs13267490	rs7839381	0.92	General cognitive ability	29844566	Davies G
ZH38T0048065	Intergenic	Local transcription	rs13267490	rs991871	0.86	Cognitive performance (MTAG)	30038396	Lee JJ
ZH38T0048123	TSS	Verified GENCODE TSS	rs10097617	rs7845219	0.81	Type 2 diabetes	22885922	Morris AP
ZH38T0048123	TSS	Verified GENCODE TSS	rs10097617	rs896854	0.88	Type 2 diabetes	20581827	Voight BF
[truncated: 466 more rows]

## Sheet: Table S5B
Supplemental Table S5B. GWAS phenotypes with biosample specific RAMPAGE rPeak enrichments
Phenotype	PMID	First Author	biosample	Fold Enrichment	p-value	FDR
Obesity related traits	23251661	Comuzzie AG	transverse colon male adult 54 years	1.47434	0.0004	0.023
			suprapubic skin male adult 54 years	1.47462	0.0004	0.023
			upper lobe of left lung female adult 53 years	1.41572	0.0008	0.0306667
			stomach female adult 53 years	1.40491	0.0013	0.0345
			thyroid gland male adult 54 years	1.43226	0.0015	0.0345
Intelligence (MTAG)	29326435	Hill WD	SK-N-DZ nuclear fraction	1.5904	0	0
			SK-N-DZ cytosolic fraction	1.53633	0.0003	0.01725
			SK-N-DZ treated with dimethyl sulfoxide for 72 hours	1.4502	0.0011	0.0394286
			NCI-H460 cytosolic fraction	1.49728	0.0014	0.0394286
			SK-MEL-5 nuclear fraction	1.40172	0.002	0.0394286
			neural cell originated from H1	1.4425	0.0021	0.0394286
			NCI-H460	1.47637	0.0024	0.0394286
General cognitive ability	29844566	Davies G	SK-N-DZ nuclear fraction	1.44202	0.0001	0.0115

## Sheet: Table S5C
Supplemental Table S5C. Genes linked with verified TSSs that overlap GWAS SNPs
Novel linked gene?	rPeak	Genetic context	Overlapping SNP	Lead SNP	RAMPAGE linked gene	GWAS reported/mapped genes	Phenotypes	PMID	First Author
No	ZH38T0000025	TSS	Verified GENCODE TSS	rs15842	ISG15	RPL39P12, ISG15	Blood protein levels	30072576	Emilsson V
No	ZH38T0000025	TSS	Verified GENCODE TSS	rs4615788	ISG15	RPL39P12, ISG15	Blood protein levels	30072576	Emilsson V
Yes	ZH38T0000096	TSS	Verified GENCODE TSS	rs2247560	CALML6	NADK, GNB1	Blood protein levels	30072576	Emilsson V
No	ZH38T0000096	TSS	Verified GENCODE TSS	rs2247560	CALML6	NADK, C1orf233, MMP23B, MMP23A, PEX10, SKI, MIB2, C1orf86, SLC35E2, TMEM52, SLC35E2B, ATAD3C, ATAD3B, ATAD3A, TMEM240, GNB1, CDK11A, CDK11B, VWA1, PRKCZ, RER1, LOC100129534, MORN1, CALML6, CFAP74, GABRD, SSU72	Body mass index	26426971	Winkler TW
Yes	ZH38T0000126	Intron	Verified unannotated TSS	rs2495366	TNFRSF14	LOC100996583, NR	Ulcerative colitis; Inflammatory bowel disease	26192919	Liu JZ
No	ZH38T0000126	Intron	Verified unannotated TSS	rs2495366	TNFRSF14	LOC100996583, TNFRSF14, FAM213B, MMEL1	Ulcerative colitis; Inflammatory bowel disease	28067908	de Lange KM
Yes	ZH38T0000127	Intron	Verified unannotated TSS	rs2234161	TNFRSF14	LOC100996583, NR	Ulcerative colitis; Inflammatory bowel disease	26192919	Liu JZ
No	ZH38T0000127	Intron	Verified unannotated TSS	rs2234161	TNFRSF14	LOC100996583, TNFRSF14, FAM213B, MMEL1	Ulcerative colitis; Inflammatory bowel disease	28067908	de Lange KM
No	ZH38T0000131	TSS	Verified GENCODE TSS	rs12752515	MMEL1	MMEL1	Rheumatoid arthritis; Rheumatoid arthritis (ACPA-positive)	23143596	Eyre S
No	ZH38T0000131	TSS	Verified GENCODE TSS	rs12752515	MMEL1	MMEL1	Primary sclerosing cholangitis	27992413	Ji SG
No	ZH38T0000131	TSS	Verified GENCODE TSS	rs12752515	MMEL1	TNFRSF14, MMEL1	Primary sclerosing cholangitis	23603763	Liu JZ
Yes	ZH38T0000158	TSS	Verified GENCODE TSS	rs12126653	DFFB	LRRC47 - CEP104, CEP104	Mean corpuscular volume	27863252	Astle WJ
Yes	ZH38T0000204	TSS	Verified GENCODE TSS	rs6674407	KLHL21	RNF207, PHF13	Systolic blood pressure	28135244	Warren HR
No	ZH38T0000229	TSS	Verified GENCODE TSS	rs17523802	PARK7	UTS2, ERRFI1, VAMP3, PARK7, PER3, TNFRSF9, CAMTA1	Crohn's disease; Ulcerative colitis; Inflammatory bowel disease	28067908	de Lange KM
No	ZH38T0000229	TSS	Verified GENCODE TSS	rs17523802	PARK7	UTS2, ERRFI1, VAMP3, PARK7, PER3, TNFRSF9, CAMTA1	Crohn's disease; Ulcerative colitis; Inflammatory bowel disease	28067908	de Lange KM
No	ZH38T0000229	TSS	Verified GENCODE TSS	rs17523802	PARK7	PARK7, TNFRSF9	Inflammatory bowel disease	23128233	Jostins L
No	ZH38T0000229	TSS	Verified GENCODE TSS	rs17523802	PARK7	PARK7, TNFRSF9 - PARK7	Blood protein levels	30072576	Emilsson V
No	ZH38T0000230	TSS	Verified GENCODE TSS	rs35675666	PARK7	UTS2, ERRFI1, VAMP3, PARK7, PER3, TNFRSF9, CAMTA1	Crohn's disease; Ulcerative colitis; Inflammatory bowel disease	28067908	de Lange KM
No	ZH38T0000230	TSS	Verified GENCODE TSS	rs35675666	PARK7	UTS2, ERRFI1, VAMP3, PARK7, PER3, TNFRSF9, CAMTA1	Crohn's disease; Ulcerative colitis; Inflammatory bowel disease	28067908	de Lange KM
No	ZH38T0000230	TSS	Verified GENCODE TSS	rs35675666	PARK7	PARK7, TNFRSF9	Inflammatory bowel disease	23128233	Jostins L
No	ZH38T0000230	TSS	Verified GENCODE TSS	rs35675666	PARK7	PARK7, TNFRSF9 - PARK7	Blood protein levels	30072576	Emilsson V
Yes	ZH38T0000363	TSS	Verified GENCODE TSS	rs13306560	CLCN6	intergenic, NPPA-AS1, NPPA	Systolic blood pressure; Systolic blood pressure	28739976	Wain LV
Yes	ZH38T0000364	Proximal	Verified unannotated TSS	rs61764044	NPPA	CLCN6	Systolic blood pressure; Diastolic blood pressure	29615537	Kulminski AM
Yes	ZH38T0000364	Proximal	Verified unannotated TSS	rs61764044	NPPA	CLCN6	Systolic blood pressure; Diastolic blood pressure	29615537	Kulminski AM
No	ZH38T0000435	TSS	Verified GENCODE TSS	rs2303195	CELA2A	EFHD2, CTRC, CELA2A, CASP9, CELA2B, CTRC - CELA2A	Alcoholic chronic pancreatitis	28754779	Rosendahl J
Yes	ZH38T0000436	Intron	Verified unannotated TSS	rs2901964	CELA2B	CELA2A	Systolic blood pressure	28135244	Warren HR
Yes	ZH38T0000436	Intron	Verified unannotated TSS	rs2901964	CELA2B	CELA2A	Systolic blood pressure; Systolic blood pressure	28739976	Wain LV
No	ZH38T0000436	Intron	Verified unannotated TSS	rs2901964	CELA2A	CELA2A	Systolic blood pressure	28135244	Warren HR
No	ZH38T0000436	Intron	Verified unannotated TSS	rs2901964	CELA2A	CELA2A	Systolic blood pressure; Systolic blood pressure	28739976	Wain LV
Yes	ZH38T0000469	TSS	Verified GENCODE TSS	rs1572381	HSPB7	ZBTB17, ZBTB17 - C1orf64, C1orf64	Glomerular filtration rate	29403010	Kanai M
Yes	ZH38T0000469	TSS	Verified GENCODE TSS	rs3738640	HSPB7	ZBTB17, ZBTB17 - C1orf64, C1orf64	Glomerular filtration rate	29403010	Kanai M
Yes	ZH38T0000469	TSS	Verified GENCODE TSS	rs732286	HSPB7	ZBTB17, ZBTB17 - C1orf64, C1orf64	Glomerular filtration rate	29403010	Kanai M
Yes	ZH38T0000469	TSS	Verified GENCODE TSS	rs945416	HSPB7	ZBTB17, ZBTB17 - C1orf64, C1orf64	Glomerular filtration rate	29403010	Kanai M
No	ZH38T0000469	TSS	Verified GENCODE TSS	rs1572381	HSPB7	HSPB7	Systolic blood pressure; Systolic blood pressure	28739976	Wain LV
No	ZH38T0000469	TSS	Verified GENCODE TSS	rs732286	HSPB7	HSPB7	Systolic blood pressure; Systolic blood pressure	28739976	Wain LV
No	ZH38T0000469	TSS	Verified GENCODE TSS	rs945416	HSPB7	HSPB7	Systolic blood pressure; Systolic blood pressure	28739976	Wain LV
Yes	ZH38T0000470	TSS	Verified GENCODE TSS	rs3754329	HSPB7	ZBTB17, ZBTB17 - C1orf64, C1orf64	Glomerular filtration rate	29403010	Kanai M
Yes	ZH38T0000470	TSS	Verified GENCODE TSS	rs945420	HSPB7	ZBTB17, ZBTB17 - C1orf64, C1orf64	Glomerular filtration rate	29403010	Kanai M
No	ZH38T0000470	TSS	Verified GENCODE TSS	rs945420	HSPB7	HSPB7	Systolic blood pressure; Systolic blood pressure	28739976	Wain LV
Yes	ZH38T0000471	Intergenic	Verified unannotated TSS	rs6660685	HSPB7	ZBTB17	Idiopathic dilated cardiomyopathy	21459883	Villard E
Yes	ZH38T0000553	TSS	Verified GENCODE TSS	rs6680255	EMC1	AKR7A2, AKR7L	Blood protein levels	30072576	Emilsson V
Yes	ZH38T0000554	TSS	Verified unannotated TSS	rs6680255	MRTO4	AKR7A2, AKR7L	Blood protein levels	30072576	Emilsson V
No	ZH38T0000575	TSS	Verified GENCODE TSS	rs11573156	PLA2G2A	PLA2G2A, NR	Blood protein levels	28240269	Suhre K
No	ZH38T0000575	TSS	Verified GENCODE TSS	rs11573156	PLA2G2A	PLA2G2A	Blood protein levels	29875488	Sun BB
No	ZH38T0000575	TSS	Verified GENCODE TSS	rs11573156	PLA2G2A	PLA2G2A	Blood protein levels	30072576	Emilsson V
No	ZH38T0000590	Intron	Verified unannotated TSS	rs3767235	CAMK2N1	Intergenic, LINC01141 - CAMK2N1	Cognitive performance (MTAG)	30038396	Lee JJ
No	ZH38T0000594	TSS	Verified GENCODE TSS	rs602950	CDA	CDA	Mean corpuscular volume	27863252	Astle WJ
Yes	ZH38T0000768	Proximal	Verified unannotated TSS	rs9438904	MACO1	TMEM57	Erythrocyte sedimentation rate	21700265	Kullo IJ
Yes	ZH38T0000768	Proximal	Verified unannotated TSS	rs9438904	MACO1	TMEM57, LDLRAP1	LDL cholesterol levels	28334899	Spracklen CN
Yes	ZH38T0000768	Proximal	Verified unannotated TSS	rs9438904	MACO1	TMEM57, LDLRAP1	Total cholesterol levels	28334899	Spracklen CN
No	ZH38T0000830	TSS	Verified GENCODE TSS	rs71636780	PIGV	NROB2, PIGV, PIGV - RN7SL165P	LDL cholesterol levels; HDL cholesterol levels; Triglyceride levels	28334899	Spracklen CN
No	ZH38T0000830	TSS	Verified GENCODE TSS	rs71636780	PIGV	NROB2, PIGV, PIGV - RN7SL165P	LDL cholesterol levels; HDL cholesterol levels; Triglyceride levels	28334899	Spracklen CN
Yes	ZH38T0000892	Proximal	Verified unannotated TSS	rs11247790	PHACTR4	Intergenic, RCC1 - TRNAU1AP	Educational attainment (MTAG)	30038396	Lee JJ
Yes	ZH38T0000894	TSS	Verified GENCODE TSS	rs34320456	PHACTR4	RCC1, snoU13, PRDX3P2, SNHG3, SNORA73A, SNORA73B	Night sleep phenotypes	27126917	Spada J
No	ZH38T0000899	TSS	Verified GENCODE TSS	rs11810945	RCC1	RCC1, snoU13, PRDX3P2, SNHG3, SNORA73A, SNORA73B	Night sleep phenotypes	27126917	Spada J
Yes	ZH38T0000925	Proximal	Verified unannotated TSS	rs571080	SRSF4	MECR	Diastolic blood pressure	30224653	Evangelou E
Yes	ZH38T0000947	Proximal	Verified unannotated TSS	rs10914367	FABP3	NKAIN1 - SNRNP40, SNRNP40, ZCCHC17, NKAIN1	Body mass index	29615537	Kulminski AM
Yes	ZH38T0001155	Proximal	Verified unannotated TSS	rs41310438	AL929472.2	MTF1, INPP5B	Blood protein levels	30072576	Emilsson V
Yes	ZH38T0001352	TSS	Verified GENCODE TSS	rs839752	SZT2	TIE1	Blood protein levels	29875488	Sun BB
Yes	ZH38T0001352	TSS	Verified GENCODE TSS	rs839752	SZT2	TIE1, C1orf210 - TIE1	Blood protein levels	30072576	Emilsson V
No	ZH38T0001352	TSS	Verified GENCODE TSS	rs839753	SZT2	SZT2, Intergenic	Cognitive performance (MTAG)	30038396	Lee JJ
No	ZH38T0001352	TSS	Verified GENCODE TSS	rs839752	SZT2	SZT2	Systolic blood pressure	30224653	Evangelou E
Yes	ZH38T0001422	TSS	Verified GENCODE TSS	rs3790583	TESK2	NR, MMACHC	General cognitive ability	29844566	Davies G
No	ZH38T0001422	TSS	Verified GENCODE TSS	rs3790583	TESK2	TESK2	Platelet distribution width	27863252	Astle WJ
No	ZH38T0001422	TSS	Verified GENCODE TSS	rs3790583	TESK2	Intergenic, TESK2	Educational attainment (MTAG)	30038396	Lee JJ
Yes	ZH38T0001423	TSS	Verified GENCODE TSS	rs3748643	TESK2	MMACHC, PRDX1	Homocysteine levels	23824729	van Meurs JB
Yes	ZH38T0001423	TSS	Verified GENCODE TSS	rs3748643	CCDC163	MMACHC, PRDX1	Homocysteine levels	23824729	van Meurs JB
No	ZH38T0001428	Intergenic	Verified unannotated TSS	rs7534467	PRDX1	MMACHC, PRDX1	Homocysteine levels	23824729	van Meurs JB
Yes	ZH38T0001633	TSS	Verified GENCODE TSS	rs35197169	MROH7	ACOT11, FAM151A	Blood protein levels	29875488	Sun BB
Yes	ZH38T0001633	TSS	Verified GENCODE TSS	rs35197169	MROH7-TTC4	ACOT11, FAM151A	Blood protein levels	29875488	Sun BB
No	ZH38T0001735	TSS	Verified GENCODE TSS	rs4344355	DOCK7	USP1, ANGPTL3, AL138847.1, DOCK7	Crohn's disease	28067908	de Lange KM
No	ZH38T0001735	TSS	Verified GENCODE TSS	rs4344355	DOCK7	ANGPTL3, DOCK7	Lipid metabolism phenotypes	22286219	Kettunen J
No	ZH38T0001735	TSS	Verified GENCODE TSS	rs4344355	DOCK7	ANGPTL3, DOCK7	Lipid metabolism phenotypes; Lipid metabolism phenotypes; Lipid metabolism phenotypes; Lipid metabolism phenotypes; Lipid metabolism phenotypes; Lipid metabolism phenotypes	19936222	Chasman DI
No	ZH38T0001735	TSS	Verified GENCODE TSS	rs4344355	DOCK7	ANGPTL3, DOCK7	Lipid metabolism phenotypes	19936222	Chasman DI
No	ZH38T0001735	TSS	Verified GENCODE TSS	rs4344355	DOCK7	ANGPTL3, DOCK7	LDL cholesterol levels	28334899	Spracklen CN
No	ZH38T0001735	TSS	Verified GENCODE TSS	rs4344355	DOCK7	ANGPTL3, DOCK7	Total cholesterol levels; Total cholesterol levels	28334899	Spracklen CN
No	ZH38T0001735	TSS	Verified GENCODE TSS	rs4344355	DOCK7	DOCK7	Total cholesterol levels	29403010	Kanai M
No	ZH38T0001735	TSS	Verified GENCODE TSS	rs4344355	DOCK7	ANGPTL3, DOCK7	Blood protein levels	30072576	Emilsson V
No	ZH38T0001735	TSS	Verified GENCODE TSS	rs4344355	DOCK7	ANGPTL3, DOCK7	Blood protein levels	30072576	Emilsson V
Yes	ZH38T0001755	TSS	Verified GENCODE TSS	rs58161194	ROR1-AS1	ROR1	Blood protein levels	30072576	Emilsson V
Yes	ZH38T0001830	Proximal	Verified unannotated TSS	rs151188803	AL033530.1	, Intergenic, LOC107984967 - LOC105378783	Educational attainment (MTAG); Educational attainment (years of education)	30038396	Lee JJ
Yes	ZH38T0001830	Proximal	Verified unannotated TSS	rs151188803	AL691520.1	, Intergenic, LOC107984967 - LOC105378783	Educational attainment (MTAG); Educational attainment (years of education)	30038396	Lee JJ
Yes	ZH38T0001830	Proximal	Verified unannotated TSS	rs151188803	AL033530.1	RP11-424D14.1, LOC105378783 - LOC105378785	General cognitive ability	29844566	Davies G
Yes	ZH38T0001830	Proximal	Verified unannotated TSS	rs151188803	AL691520.1	RP11-424D14.1, LOC105378783 - LOC105378785	General cognitive ability	29844566	Davies G
Yes	ZH38T0001830	Proximal	Verified unannotated TSS	rs151188803	AL033530.1	Intergenic, LOC105378783 - LOC105378785	Cognitive performance (MTAG)	30038396	Lee JJ
Yes	ZH38T0001830	Proximal	Verified unannotated TSS	rs151188803	AL691520.1	Intergenic, LOC105378783 - LOC105378785	Cognitive performance (MTAG)	30038396	Lee JJ
No	ZH38T0001856	Proximal	Verified unannotated TSS	rs3101339	NEGR1	NEGR1, LOC105378797	Obesity; Body mass index	23563607	Berndt SI
No	ZH38T0001856	Proximal	Verified unannotated TSS	rs3101339	NEGR1	NEGR1, LINC01360, LOC105378797	Body mass index	28892062	Akiyama M
No	ZH38T0001856	Proximal	Verified unannotated TSS	rs3101339	NEGR1	NEGR1, LOC105378797	General cognitive ability	29844566	Davies G
No	ZH38T0001856	Proximal	Verified unannotated TSS	rs3101339	NEGR1	NEGR1, LOC105378797	Body mass index	26961502	Wood AR
Yes	ZH38T0001880	Intron	Verified unannotated TSS	rs7515955	SLC44A5	ACADM	Blood metabolite levels; Blood metabolite levels	24816252	Shin SY
Yes	ZH38T0001880	Intron	Verified unannotated TSS	rs7515955	AL137803.1	ACADM	Blood metabolite levels; Blood metabolite levels	24816252	Shin SY
Yes	ZH38T0001880	Intron	Verified unannotated TSS	rs7515955	AL137803.1	ACADM, SLC44A5	Blood metabolite levels; Blood metabolite levels	24816252	Shin SY
Yes	ZH38T0001880	Intron	Verified unannotated TSS	rs7515955	AL137803.1	ACADM, SLC44A5	Blood metabolite ratios	24816252	Shin SY
Yes	ZH38T0001880	Intron	Verified unannotated TSS	rs7515955	AL137803.1	ACADM, SLC44A5	Serum metabolite levels; Serum metabolite levels; Serum metabolite levels; Serum metabolite levels	23093944	Krumsiek J
No	ZH38T0001880	Intron	Verified unannotated TSS	rs7515955	SLC44A5	ACADM, SLC44A5	Blood metabolite levels; Blood metabolite levels	24816252	Shin SY
No	ZH38T0001880	Intron	Verified unannotated TSS	rs7515955	SLC44A5	ACADM, SLC44A5	Blood metabolite ratios	24816252	Shin SY
No	ZH38T0001880	Intron	Verified unannotated TSS	rs7515955	SLC44A5	ACADM, SLC44A5	Serum metabolite levels; Serum metabolite levels; Serum metabolite levels; Serum metabolite levels	23093944	Krumsiek J
Yes	ZH38T0002120	Proximal	Verified unannotated TSS	rs2297707	CCDC18	, Intergenic, LOC100130531 - LOC100131564	Educational attainment (MTAG); Educational attainment (years of education)	30038396	Lee JJ
No	ZH38T0002128	TSS	Verified GENCODE TSS	rs10710832	BCAR3	BCAR3	Systolic blood pressure	30224653	Evangelou E
Yes	ZH38T0002325	Proximal	Verified unannotated TSS	rs2140924	SORT1	SYPL2	Cognitive ability; Cognitive ability (MTAG)	29186694	Lam M
Yes	ZH38T0002325	Proximal	Verified unannotated TSS	rs2140924	SORT1	Intergenic, MYBPHL	Self-reported math ability	30038396	Lee JJ
Yes	ZH38T0002325	Proximal	Verified unannotated TSS	rs2140924	SORT1	MYBPHL	General cognitive ability	29844566	Davies G
Yes	ZH38T0002325	Proximal	Verified unannotated TSS	rs2140924	SORT1	CYB561D1, Intergenic	Cognitive performance (MTAG)	30038396	Lee JJ
No	ZH38T0002325	Proximal	Verified unannotated TSS	rs2140924	SORT1	SYPL2, PSMA5 - SYPL2, SORT1, PSMA5, AMIGO1, CYB561D1, ATXN7L2	Chronic kidney disease	20383146	Kottgen A
No	ZH38T0002333	TSS	Verified GENCODE TSS	rs3737182	GNAI3	AMPD2, GNAT2, GNAI3	Major depressive disorder	20125088	Shi J
No	ZH38T0002365	TSS	Verified GENCODE TSS	rs1494324	CD53	CD53	Cytomegalovirus antibody response	21993531	Kuparinen T
No	ZH38T0002571	TSS	Verified GENCODE TSS	rs562038	PHGDH	PHGDH	Amino acid levels	26068415	Draisma HHM
No	ZH38T0002571	TSS	Verified GENCODE TSS	rs561931	PHGDH	ZNF697 - LOC105378937, PHGDH	Blood metabolite levels	24816252	Shin SY
No	ZH38T0002578	TSS	Verified GENCODE TSS	rs3216034	REG4	NR, REG4	Blood protein levels	29875488	Sun BB
No	ZH38T0002720	TSS	Verified GENCODE TSS	rs1890042	CHD1L	CHD1L, FMO5	Mitochondrial DNA levels	25240745	Lopez S
Yes	ZH38T0002802	TSS	Verified GENCODE TSS	rs2027349	OTUD7B	Intergenic, LOC105371433	Self-reported math ability; Self-reported math ability (MTAG)	30038396	Lee JJ
Yes	ZH38T0002802	TSS	Verified GENCODE TSS	rs2027349	AC244033.2	Intergenic, LOC105371433	Self-reported math ability; Self-reported math ability (MTAG)	30038396	Lee JJ
Yes	ZH38T0002803	TSS	Verified GENCODE TSS	rs2027349	VPS45	Intergenic, LOC105371433	Self-reported math ability; Self-reported math ability (MTAG)	30038396	Lee JJ
No	ZH38T0002837	TSS	Verified GENCODE TSS	rs12724450	ECM1	TARS2, FALEC, ECM1, MRPS21, AC242988.1, PRPF3, RPRD2	Blood protein levels	28240269	Suhre K
No	ZH38T0002859	TSS	Verified GENCODE TSS	rs3754212	CTSS	CTSK, RP11-363I22.3, ARNT, GOLPH3L, HORMAD1, CTSS, RNU6-1042P	Blood protein levels	28240269	Suhre K
Yes	ZH38T0002944	Proximal	Verified unannotated TSS	rs3811414	TDRKH-AS1	MRPL9 - TDRKH, OAZ3	Carotid plaque burden	28282560	Pott J
Yes	ZH38T0003011	TSS	Verified GENCODE TSS	rs1750309	SPRR2D	LOC105371446, SNORA31, SPRR3, SPRR1B	Inflammatory skin disease	25574825	Baurecht H
No	ZH38T0003039	TSS	Verified GENCODE TSS	rs11488669	S100A4	S100A4, LOC101928034 - S100A2	Blood protein levels	29875488	Sun BB
Yes	ZH38T0003092	TSS	Verified GENCODE TSS	rs6661009	CREB3L4	SLC39A1	Lentiform nucleus volume	22903471	Hibar DP
Yes	ZH38T0003092	TSS	Verified GENCODE TSS	rs6661009	CREB3L4	DENND4B	Lentiform nucleus volume	22903471	Hibar DP
Yes	ZH38T0003092	TSS	Verified GENCODE TSS	rs6661009	CREB3L4	GATAD2B	Lentiform nucleus volume	22903471	Hibar DP
Yes	ZH38T0003092	TSS	Verified GENCODE TSS	rs6661009	CREB3L4	LOC343052, LOC105371448	Lentiform nucleus volume	22903471	Hibar DP
No	ZH38T0003092	TSS	Verified GENCODE TSS	rs6661009	CREB3L4	CREB3L4	Blood protein levels	29875488	Sun BB
No	ZH38T0003092	TSS	Verified GENCODE TSS	rs6661009	CREB3L4	NUP210L, CREB3L4	Blood protein levels	30072576	Emilsson V
Yes	ZH38T0003120	TSS	Verified GENCODE TSS	rs11265425	HAX1	TPM3	Mean corpuscular volume	29403010	Kanai M
No	ZH38T0003128	Intron	Verified unannotated TSS	rs7518199	IL6R	IL6R	C-reactive protein levels	21300955	Dehghan A
No	ZH38T0003128	Intron	Verified unannotated TSS	rs7518199	IL6R	IL6R	Fibrinogen levels	26561523	de Vries PS
No	ZH38T0003128	Intron	Verified unannotated TSS	rs7518199	IL6R	IL6R	Fibrinogen levels	28107422	de Vries PS
No	ZH38T0003128	Intron	Verified unannotated TSS	rs7518199	IL6R	IL6R	Abdominal aortic aneurysm	27899403	Jones GT
No	ZH38T0003128	Intron	Verified unannotated TSS	rs7518199	IL6R	IL6R	Itch intensity from mosquito bite; Mosquito bite size	28199695	Jones AV
No	ZH38T0003128	Intron	Verified unannotated TSS	rs7518199	IL6R	NR, IL6R	Blood protein levels	28240269	Suhre K
No	ZH38T0003128	Intron	Verified unannotated TSS	rs7518199	IL6R	IL6R	Blood protein levels	28240269	Suhre K
No	ZH38T0003128	Intron	Verified unannotated TSS	rs7518199	IL6R	IL6R	Blood protein levels; Blood protein levels	29875488	Sun BB
No	ZH38T0003128	Intron	Verified unannotated TSS	rs7518199	IL6R	IL6R	C-reactive protein levels	29403010	Kanai M
No	ZH38T0003128	Intron	Verified unannotated TSS	rs7518199	IL6R	IL6R	Blood protein levels	30072576	Emilsson V
Yes	ZH38T0003183	TSS	Verified GENCODE TSS	rs11264333	SLC50A1	EFNA3 - EFNA1, EFNA3, EFNA1	Urinary albumin excretion	30220432	Haas ME
Yes	ZH38T0003206	TSS	Verified GENCODE TSS	rs2974929	GBAP1	TRIM46, KRTC, MUC1, THBS3, MIR92B	Urinary albumin-to-creatinine ratio in non-diabetics; Urinary albumin-to-creatinine ratio	26631737	Teumer A
Yes	ZH38T0003206	TSS	Verified GENCODE TSS	rs2974929	GBAP1	THBS3	Urinary albumin-to-creatinine ratio	26631737	Teumer A
No	ZH38T0003206	TSS	Verified GENCODE TSS	rs2974929	GBAP1	GBAP1, GBAP1 - MTX1P1	Creatinine levels; Glomerular filtration rate	29403010	Kanai M
No	ZH38T0003208	Proximal	Verified unannotated TSS	rs2990246	MTX1P1	GBAP1, GBAP1 - MTX1P1	Creatinine levels; Glomerular filtration rate	29403010	Kanai M
Yes	ZH38T0003240	TSS	Verified GENCODE TSS	rs2666826	YY1AP1	NR, DAP3	Inflammatory bowel disease	26192919	Liu JZ
Yes	ZH38T0003319	TSS	Verified GENCODE TSS	rs139949895	CCT3	SMG5, TMEM79	Glycated hemoglobin levels	29170429	Hachiya T
Yes	ZH38T0003319	TSS	Verified GENCODE TSS	rs139949895	CCT3	SMG5	Hemoglobin A1c levels	29403010	Kanai M
No	ZH38T0003319	TSS	Verified GENCODE TSS	rs139949895	CCT3	SMG5, CCT3, c1orf85, TMEM79	Glycated hemoglobin levels	24647736	Chen P
Yes	ZH38T0003351	TSS	Verified GENCODE TSS	rs3806415	ISG20L2	RRNAD1, HDGF, PMVK	HDL cholesterol levels	28334899	Spracklen CN
Yes	ZH38T0003351	TSS	Verified GENCODE TSS	rs3806415	CRABP2	RRNAD1, HDGF, PMVK	HDL cholesterol levels	28334899	Spracklen CN
Yes	ZH38T0003351	TSS	Verified GENCODE TSS	rs3806415	ISG20L2	HDGF	Blood protein levels	30072576	Emilsson V
Yes	ZH38T0003351	TSS	Verified GENCODE TSS	rs3806415	CRABP2	HDGF	Blood protein levels	30072576	Emilsson V
No	ZH38T0003374	Intron	Verified unannotated TSS	rs11264581	PEAR1	PEAR1	Blood protein levels	30072576	Emilsson V
No	ZH38T0003421	TSS	Verified GENCODE TSS	rs28383571	APCS	RP11-740C1.2, APCS, OR10AE1P - APCS, OR10J6P, OR10AE1P	Blood protein levels	28240269	Suhre K
No	ZH38T0003421	TSS	Verified GENCODE TSS	rs28383571	APCS	APCS, LOC646430 - LOC107985215	Blood protein levels	29875488	Sun BB
No	ZH38T0003421	TSS	Verified GENCODE TSS	rs28383571	APCS	APCS, OR10J6P - CRPP1	Blood protein levels	30072576	Emilsson V
Yes	ZH38T0003493	TSS	Verified unannotated TSS	rs2295613	AL121985.1	LOC107985220 - SETP9, SLAMF1	Schizophrenia (treatment resistant)	22479419	Liou YJ
No	ZH38T0003583	Intron	Verified unannotated TSS	rs1875763	FCRLB	FCRLB, NR	White blood cell count; Non-albumin protein levels	29403010	Kanai M
Yes	ZH38T0003646	TSS	Verified GENCODE TSS	rs2251768	TMCO1-AS1	TMCO1	Intraocular pressure	22570627	van Koolwijk LM
Yes	ZH38T0003646	TSS	Verified GENCODE TSS	rs2251768	TMCO1-AS1	TMCO1, LOC440700 - TMCO1	Glaucoma (primary open-angle)	25173105	Gharahkhani P
No	ZH38T0003687	TSS	Verified GENCODE TSS	rs1933114	XCL2	XCL1, LOC101928565 - XCL2	Blood protein levels	29875488	Sun BB
No	ZH38T0003689	TSS	Verified GENCODE TSS	rs1052591	DPT	DPT	Blood protein levels	29875488	Sun BB
No	ZH38T0003689	TSS	Verified GENCODE TSS	rs1052591	DPT	DPT	Blood protein levels	30072576	Emilsson V
No	ZH38T0003741	Proximal	Verified unannotated TSS	rs10912675	FMO1	FMO1, FMO1 - FMO4	Sudden cardiac arrest	21658281	Aouizerat BE
Yes	ZH38T0003763	TSS	Verified GENCODE TSS	rs2294718	EEF1AKNMT	LOC391136 - LOC105371614, SCARNA20	Platelet distribution width	27863252	Astle WJ
No	ZH38T0003764	TSS	Verified GENCODE TSS	rs114247451	DNM3	, Intergenic, RPLP1P3 - DNM3	Educational attainment (MTAG); Educational attainment (years of education)	30038396	Lee JJ
Yes	ZH38T0003792	Proximal	Verified unannotated TSS	rs10798295	AL139142.2	NR, SERPINC1	Subjective well-being (MTAG)	29292387	Turley P
No	ZH38T0003810	Intron	Verified unannotated TSS	rs2179214	RABGAP1L	NR, RABGAP1L	General cognitive ability	29844566	Davies G
No	ZH38T0003810	Intron	Verified unannotated TSS	rs2179214	RABGAP1L	Intergenic, RABGAP1L	Cognitive performance (MTAG)	30038396	Lee JJ
No	ZH38T0003958	Intron	Verified unannotated TSS	rs681054	NMNAT2	NMNAT2	General cognitive ability	29844566	Davies G
No	ZH38T0003962	Proximal	Verified unannotated TSS	rs41272536	SMG7	NCF2, SMG7	Systemic lupus erythematosus; Systemic lupus erythematosus	26502338	Bentham J
Yes	ZH38T0003973	TSS	Verified GENCODE TSS	rs112313734	ARPC5	RGL1, APOBEC4	Systemic lupus erythematosus	23273568	Yang W
No	ZH38T0003974	TSS	Verified GENCODE TSS	rs114491252	RGL1	RGL1, APOBEC4	Systemic lupus erythematosus	23273568	Yang W
No	ZH38T0003977	TSS	Verified GENCODE TSS	rs6699011	APOBEC4	RGL1, APOBEC4	Systemic lupus erythematosus	23273568	Yang W
No	ZH38T0003977	TSS	Verified GENCODE TSS	rs6699033	APOBEC4	RGL1, APOBEC4	Systemic lupus erythematosus	23273568	Yang W
No	ZH38T0004073	TSS	Verified GENCODE TSS	rs148212596	GLRX2	GLRX2	Blood protein levels	29875488	Sun BB
No	ZH38T0004260	Proximal	Verified unannotated TSS	rs7515776	CHI3L1	NR, CHI3L1 - CHIT1	Blood protein levels	29875488	Sun BB
No	ZH38T0004282	TSS	Verified GENCODE TSS	rs4971252	FMOD	FMOD - LOC100131747, FMOD	Blood protein levels	30072576	Emilsson V
Yes	ZH38T0004384	TSS	Verified GENCODE TSS	rs823144	RAB29	SLC41A1, LOC105371702 - SLC41A1	Prostate-specific antigen levels	25434496	Kim S
No	ZH38T0004384	TSS	Verified GENCODE TSS	rs823144	RAB29	NUCKS1 - RAB29, NUCKS1	Body mass index	28892062	Akiyama M
No	ZH38T0004414	Proximal	Verified unannotated TSS	rs3024493	IL10	IL10, LOC105372877 - IL10	Crohn's disease; Ulcerative colitis; Inflammatory bowel disease	28067908	de Lange KM
No	ZH38T0004414	Proximal	Verified unannotated TSS	rs3024493	IL10	IL10, LOC105372877 - IL10	Crohn's disease; Ulcerative colitis; Inflammatory bowel disease	28067908	de Lange KM
No	ZH38T0004414	Proximal	Verified unannotated TSS	rs3024493	IL10	IL10, LOC105372877 - IL10	Type 1 diabetes	19430480	Barrett JC
No	ZH38T0004414	Proximal	Verified unannotated TSS	rs3024493	IL10	IL10	Systemic lupus erythematosus	26502338	Bentham J
No	ZH38T0004414	Proximal	Verified unannotated TSS	rs3024493	IL10	IL10, NR	Inflammatory bowel disease	26192919	Liu JZ
No	ZH38T0004414	Proximal	Verified unannotated TSS	rs3024493	IL10	IL19, FAIM3, IL10, RASSF5, IL20, PIGR, IL24, LOC105372877 - IL10, MAPKAPK2	Inflammatory bowel disease	23128233	Jostins L
No	ZH38T0004414	Proximal	Verified unannotated TSS	rs3024493	IL10	IL10, LOC105372877 - IL10	Systemic lupus erythematosus	19838195	Gateva V
No	ZH38T0004414	Proximal	Verified unannotated TSS	rs3024493	IL10	IL10, LOC105372877 - IL10	Type 1 diabetes	21829393	Plagnol V
No	ZH38T0004414	Proximal	Verified unannotated TSS	rs3024493	IL10	IL10, LOC105372877 - IL10	Inflammatory bowel disease	28008999	Ostrowski J
No	ZH38T0004414	Proximal	Verified unannotated TSS	rs3024493	IL10	LOC105372877 - IL10, intergenic	Type 1 diabetes	25751624	Onengut-Gumuscu S
No	ZH38T0004568	Intron	Verified unannotated TSS	rs340879	PROX1	PROX1-AS1, PROX1	Type 2 diabetes; Type 2 diabetes	22885922	Morris AP
No	ZH38T0004568	Intron	Verified unannotated TSS	rs340879	PROX1	PROX1-AS1, PROX1	Homeostasis model assessment of beta-cell function; Fasting blood glucose	20081858	Dupuis J
No	ZH38T0004568	Intron	Verified unannotated TSS	rs340879	PROX1	PROX1-AS1, PROX1	Fasting blood glucose; Fasting blood glucose (BMI interaction)	22581228	Manning AK
No	ZH38T0004572	TSS	Verified GENCODE TSS	rs340839	PROX1	PROX1-AS1, PROX1	Homeostasis model assessment of beta-cell function; Fasting blood glucose	20081858	Dupuis J
No	ZH38T0004572	TSS	Verified GENCODE TSS	rs340839	PROX1	PROX1-AS1, PROX1	Fasting blood glucose; Fasting blood glucose (BMI interaction)	22581228	Manning AK
Yes	ZH38T0004573	TSS	Verified unannotated TSS	rs340839	AC011700.1	PROX1-AS1, PROX1	Homeostasis model assessment of beta-cell function; Fasting blood glucose	20081858	Dupuis J
Yes	ZH38T0004573	TSS	Verified unannotated TSS	rs340839	AC011700.1	PROX1-AS1, PROX1	Fasting blood glucose; Fasting blood glucose (BMI interaction)	22581228	Manning AK
No	ZH38T0004573	TSS	Verified unannotated TSS	rs340839	PROX1-AS1	PROX1-AS1, PROX1	Homeostasis model assessment of beta-cell function; Fasting blood glucose	20081858	Dupuis J
No	ZH38T0004573	TSS	Verified unannotated TSS	rs340839	PROX1-AS1	PROX1-AS1, PROX1	Fasting blood glucose; Fasting blood glucose (BMI interaction)	22581228	Manning AK
No	ZH38T0004859	TSS	Verified GENCODE TSS	rs5051	AGT	AGT	Systolic blood pressure; Diastolic blood pressure	27618452	Ehret GB
No	ZH38T0004859	TSS	Verified GENCODE TSS	rs5051	AGT	AGT	Systolic blood pressure; Diastolic blood pressure	27618452	Ehret GB
No	ZH38T0004859	TSS	Verified GENCODE TSS	rs5049	AGT	AGT	Blood protein levels	30072576	Emilsson V
No	ZH38T0005006	TSS	Verified GENCODE TSS	rs3904682	SDCCAG8	Intergenic, SDCCAG8	Self-reported math ability	30038396	Lee JJ
Yes	ZH38T0005205	TSS	Verified GENCODE TSS	rs7477466	TUBAL3	NR, NET1	General cognitive ability	29844566	Davies G
No	ZH38T0005208	TSS	Verified GENCODE TSS	rs7090012	NET1	NR, NET1	General cognitive ability	29844566	Davies G
Yes	ZH38T0005226	TSS	Verified GENCODE TSS	rs3736460	GDI2	FAM208B	Systolic blood pressure	30224653	Evangelou E
No	ZH38T0005226	TSS	Verified GENCODE TSS	rs3736461	GDI2	GDI2	Blood protein levels	30072576	Emilsson V
No	ZH38T0005232	Proximal	Verified unannotated TSS	rs4749859	IL15RA	LOC107984200, NR, IL15RA	Blood protein levels	29875488	Sun BB
No	ZH38T0005324	TSS	Verified GENCODE TSS	rs7475265	CAMK1D	, Intergenic, CAMK1D	Educational attainment (MTAG); Highest math class taken (MTAG); Educational attainment (years of education)	30038396	Lee JJ
No	ZH38T0005336	TSS	Verified GENCODE TSS	rs2399954	UCMA	UCMA - PHYH, UCMA	Blood protein levels	29875488	Sun BB
No	ZH38T0005428	TSS	Verified GENCODE TSS	rs2357928	CACNB2	CACNB2	Body mass index	28892062	Akiyama M
No	ZH38T0005664	TSS	Verified GENCODE TSS	rs11597888	EPC1	EPC1	Sexual dysfunction (female)	22509378	Burri A
No	ZH38T0005664	TSS	Verified GENCODE TSS	rs11597888	EPC1	EPC1	Diastolic blood pressure	30224653	Evangelou E
No	ZH38T0005691	Intron	Verified unannotated TSS	rs11009175	ITGB1	ITGB1, LOC101929475	Depression (quantitative trait)	20800221	Terracciano A
Yes	ZH38T0005709	TSS	Verified GENCODE TSS	rs4934730	AL392046.1	CREM, CUL2, CCNY	Crohn's disease; Inflammatory bowel disease	28067908	de Lange KM
Yes	ZH38T0005709	TSS	Verified GENCODE TSS	rs4934730	AL392046.1	NR, LOC105376491 - CUL2	Ulcerative colitis; Crohn's disease; Inflammatory bowel disease	26192919	Liu JZ
Yes	ZH38T0005709	TSS	Verified GENCODE TSS	rs4934730	CUL2	NR, CREM	Inflammatory bowel disease	26192919	Liu JZ
Yes	ZH38T0005709	TSS	Verified GENCODE TSS	rs4934730	AL392046.1	NR, CREM	Inflammatory bowel disease	26192919	Liu JZ
Yes	ZH38T0005709	TSS	Verified GENCODE TSS	rs4934730	AL392046.1	LOC105376491 - CUL2, CREM	Inflammatory bowel disease	23128233	Jostins L
No	ZH38T0005709	TSS	Verified GENCODE TSS	rs4934730	CUL2	CREM, CUL2, CCNY	Crohn's disease; Inflammatory bowel disease	28067908	de Lange KM
No	ZH38T0005709	TSS	Verified GENCODE TSS	rs4934730	CUL2	NR, LOC105376491 - CUL2	Ulcerative colitis; Crohn's disease; Inflammatory bowel disease	26192919	Liu JZ
No	ZH38T0005709	TSS	Verified GENCODE TSS	rs4934730	CUL2	LOC105376491 - CUL2, CREM	Inflammatory bowel disease	23128233	Jostins L
Yes	ZH38T0005794	Intron	Verified unannotated TSS	rs71496621	MARCH8	ZFAND4	Mean corpuscular volume	29403010	Kanai M
Yes	ZH38T0005794	Intron	Verified unannotated TSS	rs75820736	MARCH8	ZFAND4	Mean corpuscular volume	29403010	Kanai M
No	ZH38T0005794	Intron	Verified unannotated TSS	rs71496621	2021-03-08	AGAP4, ALOX5, FAM21C, MARCH8, ANUBL1	Mean corpuscular hemoglobin; Mean corpuscular volume	20139978	Kamatani Y
No	ZH38T0005794	Intron	Verified unannotated TSS	rs75820736	2021-03-08	AGAP4, ALOX5, FAM21C, MARCH8, ANUBL1	Mean corpuscular hemoglobin; Mean corpuscular volume	20139978	Kamatani Y
No	ZH38T0005794	Intron	Verified unannotated TSS	rs71496621	2021-03-08	AGAP4, ALOX5, FAM21C, MARCH8, ANUBL1	Mean corpuscular hemoglobin; Mean corpuscular volume	20139978	Kamatani Y
No	ZH38T0005794	Intron	Verified unannotated TSS	rs75820736	2021-03-08	AGAP4, ALOX5, FAM21C, MARCH8, ANUBL1	Mean corpuscular hemoglobin; Mean corpuscular volume	20139978	Kamatani Y
No	ZH38T0005794	Intron	Verified unannotated TSS	rs7086046	2021-03-08	2021-03-08	Blood metabolite levels	24816252	Shin SY
No	ZH38T0005794	Intron	Verified unannotated TSS	rs71496621	2021-03-08	LOC105378286, NR, MARCH8	Red blood cell count; Mean corpuscular hemoglobin	27863252	Astle WJ
No	ZH38T0005794	Intron	Verified unannotated TSS	rs75820736	2021-03-08	LOC105378286, NR, MARCH8	Red blood cell count; Mean corpuscular hemoglobin	27863252	Astle WJ
No	ZH38T0005794	Intron	Verified unannotated TSS	rs7086046	2021-03-08	ALOX5, MARCH8	HDL cholesterol levels; Total cholesterol levels	28334899	Spracklen CN
No	ZH38T0005794	Intron	Verified unannotated TSS	rs7086046	2021-03-08	ALOX5, MARCH8	HDL cholesterol levels; Total cholesterol levels	28334899	Spracklen CN
No	ZH38T0005794	Intron	Verified unannotated TSS	rs71496621	2021-03-08	NR, MARCH8	Mean corpuscular volume	27863252	Astle WJ
No	ZH38T0005794	Intron	Verified unannotated TSS	rs75820736	2021-03-08	NR, MARCH8	Mean corpuscular volume	27863252	Astle WJ
No	ZH38T0005794	Intron	Verified unannotated TSS	rs71496621	2021-03-08	2021-03-08	Mean corpuscular hemoglobin	29403010	Kanai M
No	ZH38T0005794	Intron	Verified unannotated TSS	rs75820736	2021-03-08	2021-03-08	Mean corpuscular hemoglobin	29403010	Kanai M
No	ZH38T0005807	TSS	Verified GENCODE TSS	rs10993994	MSMB	MSMB, MSMB - RPL23AP61	Prostate-specific antigen levels	23269536	Sun J
No	ZH38T0005807	TSS	Verified GENCODE TSS	rs10993994	MSMB	MSMB, MSMB - RPL23AP61	PCA3 expression level	23555189	Chen Z
No	ZH38T0005807	TSS	Verified GENCODE TSS	rs10993994	MSMB	MSMB, MSMB - RPL23AP61	Prostate-specific antigen levels	25434496	Kim S
No	ZH38T0005807	TSS	Verified GENCODE TSS	rs10993994	MSMB	MSMB, MSMB - RPL23AP61	Prostate-specific antigen levels	28139693	Hoffmann TJ
No	ZH38T0005807	TSS	Verified GENCODE TSS	rs10993994	MSMB	MSMB, MSMB - RPL23AP61	Blood protein levels	29875488	Sun BB
No	ZH38T0005807	TSS	Verified GENCODE TSS	rs10993994	MSMB	MSMB, MSMB - RPL23AP61	Blood protein levels	30072576	Emilsson V
No	ZH38T0005894	TSS	Verified GENCODE TSS	rs45602536	MBL2	NR, MBL2	Blood protein levels	29875488	Sun BB
Yes	ZH38T0005913	TSS	Verified GENCODE TSS	rs2251039	CISD1	NR, IPMK, TPT1P10	Inflammatory bowel disease	26192919	Liu JZ
No	ZH38T0005913	TSS	Verified GENCODE TSS	rs2251039	CISD1	IPMK, CISD1	Inflammatory bowel disease	23128233	Jostins L
Yes	ZH38T0005916	Intron	Verified unannotated TSS	rs2790189	CISD1	NR, IPMK, TPT1P10	Inflammatory bowel disease	26192919	Liu JZ
No	ZH38T0005916	Intron	Verified unannotated TSS	rs2790189	CISD1	IPMK, CISD1	Inflammatory bowel disease	23128233	Jostins L
Yes	ZH38T0006005	TSS	Verified GENCODE TSS	rs2273772	DNAJC12	NR, RNU6-523P - RPL12P8	Major depressive disorder (unexposed to adversity); Major depressive disorder	29495898	Peterson RE
Yes	ZH38T0006007	TSS	Verified unannotated TSS	rs75818614	SIRT1	NR, RNU6-523P - RPL12P8	Major depressive disorder (unexposed to adversity); Major depressive disorder	29495898	Peterson RE
No	ZH38T0006082	TSS	Verified GENCODE TSS	rs7077538	PPA1	RP11-367H5.8, PPA1 - NPFFR1, PPA1, NPFFR1	Blood protein levels	28240269	Suhre K
No	ZH38T0006433	Proximal	Verified unannotated TSS	rs1800682	FAS	ACTA2, ACTA, FAS	Chronic lymphocytic leukemia	24292274	Speedy HE
No	ZH38T0006433	Proximal	Verified unannotated TSS	rs1800682	FAS	ACTA, FAS-AS1, FAS	Chronic lymphocytic leukemia	28165464	Law PJ
No	ZH38T0006433	Proximal	Verified unannotated TSS	rs2234768	FAS	FAS	Mosquito bite size	28199695	Jones AV
No	ZH38T0006441	TSS	Verified GENCODE TSS	rs1332327	LIPA	LIPA	Coronary heart disease	21606135	Wild PS
No	ZH38T0006441	TSS	Verified GENCODE TSS	rs1332327	LIPA	LIPA	Fibrinogen levels	26561523	de Vries PS
No	ZH38T0006519	TSS	Verified GENCODE TSS	rs10882283	RBP4	RBP4	Blood protein levels	30072576	Emilsson V
No	ZH38T0006546	TSS	Verified GENCODE TSS	rs4986894	CYP2C19	CYP2C19	Acenocoumarol maintenance dosage	19578179	Teichert M
No	ZH38T0006546	TSS	Verified GENCODE TSS	rs4986894	CYP2C19	CYP2C9, CYP2C18 - CYP2C19	Blood metabolite levels	24816252	Shin SY
No	ZH38T0006546	TSS	Verified GENCODE TSS	rs17885098	CYP2C19	CYP2C19, CYP2C18	Serum metabolite levels	23093944	Krumsiek J
No	ZH38T0006628	Intron	Verified unannotated TSS	rs45587331	PIK3AP1	PIK3AP1	Alanine transaminase levels	29403010	Kanai M
No	ZH38T0006679	Intergenic	Verified unannotated TSS	rs17111484	HPSE2	HPSE2	Asthma (childhood onset)	23829686	Ding L
Yes	ZH38T0006711	TSS	Verified GENCODE TSS	rs12784396	CWF19L1	Intergenic, ERLIN1	Educational attainment (MTAG); Cognitive performance (MTAG)	30038396	Lee JJ
Yes	ZH38T0006711	TSS	Verified GENCODE TSS	rs12784396	CWF19L1	ERLIN1	General cognitive ability	29844566	Davies G
Yes	ZH38T0006711	TSS	Verified GENCODE TSS	rs12784396	CWF19L1	NR, BLOC1S2	General cognitive ability	29844566	Davies G
Yes	ZH38T0006711	TSS	Verified GENCODE TSS	rs12784396	CWF19L1	Intergenic, ERLIN1	Educational attainment (MTAG); Cognitive performance (MTAG)	30038396	Lee JJ
Yes	ZH38T0006796	Intron	Verified unannotated TSS	rs11593146	CUEDC2	GBF1	Hand grip strength	29313844	Willems SM
Yes	ZH38T0006796	Intron	Verified unannotated TSS	rs11597439	CUEDC2	GBF1	Hand grip strength	29313844	Willems SM
Yes	ZH38T0006821	TSS	Verified GENCODE TSS	rs743572	CYP17A1	LOC107984265, CNNM2, BORCS7-ASMT	Creatine kinase levels	29403010	Kanai M
Yes	ZH38T0006861	TSS	Verified GENCODE TSS	rs4387287	STN1	OBFC1 - LOC102724351, OBFC1	Basal cell carcinoma	27539887	Chahal HS
Yes	ZH38T0006861	TSS	Verified GENCODE TSS	rs4387287	STN1	OBFC1	Diastolic blood pressure	28739976	Wain LV
Yes	ZH38T0006861	TSS	Verified GENCODE TSS	rs4387287	STN1	OBFC1 - LOC102724351, OBFC1	Renal cell carcinoma	28598434	Scelo G
Yes	ZH38T0006932	TSS	Verified GENCODE TSS	rs7076609	ADD3-AS1	, Intergenic, ADD3	Educational attainment (MTAG); Educational attainment (years of education)	30038396	Lee JJ
No	ZH38T0006945	TSS	Verified GENCODE TSS	rs111446990	MXI1	MXI1, LOC105378479 - MXI1	Diastolic blood pressure	30224653	Evangelou E
Yes	ZH38T0007061	Intron	Verified unannotated TSS	rs11197861	SHTN1	PNLIPRP1, PNLIPRP3, PNLIPRP2, KCNK18, VAX1, KIAA1598, HSPA12A, PNLIP, SLC18A2, ENO4, C10orf82, MIR3663, PDZD8	Body mass index	26426971	Winkler TW
Yes	ZH38T0007070	Proximal	Verified unannotated TSS	rs860626	PDZD8	EMX2OS, NR	Subjective well-being (MTAG); Neuroticism (MTAG)	29292387	Turley P
No	ZH38T0007070	Proximal	Verified unannotated TSS	rs860626	EMX2OS	EMX2OS, NR	Subjective well-being (MTAG); Neuroticism (MTAG)	29292387	Turley P
Yes	ZH38T0007189	TSS	Verified GENCODE TSS	rs144443222	EEF1AKMT2	NR, METTL10	Childhood ear infection	28928442	Tian C
Yes	ZH38T0007290	TSS	Verified GENCODE TSS	rs71487219	BET1L	ODF3	Hemoglobin A1c levels	29403010	Kanai M
No	ZH38T0007295	Intergenic	Verified unannotated TSS	rs73396521	NLRP6	NLRP6, COX8BP - NLRP6, PSMD13	Mean platelet volume	22139419	Gieger C
No	ZH38T0007536	Proximal	Verified unannotated TSS	rs907613	LSP1	LSP1, LOC107984299 - LSP1	Ulcerative colitis; Inflammatory bowel disease	28067908	de Lange KM
No	ZH38T0007536	Proximal	Verified unannotated TSS	rs907613	LSP1	CCR1, CCR2, CCR3, LTF, LOC107984299 - LSP1, NR, FLJ78302, CCR5	Ulcerative colitis; Inflammatory bowel disease	26192919	Liu JZ
No	ZH38T0007536	Proximal	Verified unannotated TSS	rs907613	LSP1	LSP1, TNNI2, LOC107984299 - LSP1	Inflammatory bowel disease	23128233	Jostins L
No	ZH38T0007544	Exon	Verified unannotated TSS	rs4980389	LSP1	LSP1	Systolic blood pressure	29403010	Kanai M
No	ZH38T0007544	Exon	Verified unannotated TSS	rs4980389	LSP1	LSP1	Mean arterial pressure	29403010	Kanai M
Yes	ZH38T0007580	Intron	Verified unannotated TSS	rs3741204	AC132217.2	IGF2, INS-IGF2, INS	Type 1 diabetes	17632545	Hakonarson H
Yes	ZH38T0007580	Intron	Verified unannotated TSS	rs3741204	AC132217.2	IGF2, IGF2AS, INS-IGF2	Type 1 diabetes	21829393	Plagnol V
No	ZH38T0007580	Intron	Verified unannotated TSS	rs3741204	INS-IGF2	IGF2, INS-IGF2, INS	Type 1 diabetes	17632545	Hakonarson H
No	ZH38T0007580	Intron	Verified unannotated TSS	rs3741204	INS-IGF2	IGF2, IGF2AS, INS-IGF2	Type 1 diabetes	21829393	Plagnol V
No	ZH38T0007588	Proximal	Verified unannotated TSS	rs734095	C11orf21	C11orf21	Mean corpuscular hemoglobin	27863252	Astle WJ
No	ZH38T0007588	Proximal	Verified unannotated TSS	rs734095	C11orf21	TSPAN32, C11orf21	Mean corpuscular volume	27863252	Astle WJ
No	ZH38T0007591	Proximal	Verified unannotated TSS	rs55648810	C11orf21	C11orf21	Mean corpuscular hemoglobin	27863252	Astle WJ
No	ZH38T0007704	TSS	Verified GENCODE TSS	rs11040999	GVINP1	NR, GVINP1 - GVINP2	Periodontal disease-related phenotypes	24347629	Shaffer JR
Yes	ZH38T0007939	Intron	Verified unannotated TSS	rs10535629	NCR3LG1	RPS13, KCNJ11, KCNC1, OR7E14P, SERGEF, PIK3C2A, PLEKHA7, ABCC8, USH1C, NUCB2, LOC105376576, MYOD1	Body mass index	26426971	Winkler TW
No	ZH38T0007939	Intron	Verified unannotated TSS	rs10535629	NCR3LG1	RPS13, MYOD1, NCR3LG1, KCNC1, OR7E14P, SERGEF, PIK3C2A, PLEKHA7, ABCC8, LOC107984316 - KCNJ11, USH1C, NUCB2	Body mass index	26426971	Winkler TW
No	ZH38T0007967	TSS	Verified GENCODE TSS	rs1829575	SAA1	SAA2-SAA4 - ST13P5, ST13P5, RNA5SP334, SAA1	Blood protein levels	28240269	Suhre K
No	ZH38T0007967	TSS	Verified GENCODE TSS	rs2445166	SAA1	NR, SAA1	Blood protein levels	29875488	Sun BB
No	ZH38T0007973	TSS	Verified GENCODE TSS	rs3802968	GTF2H1	HPS5, GTF2H1	Blood protein levels	28240269	Suhre K
No	ZH38T0007973	TSS	Verified GENCODE TSS	rs3825025	GTF2H1	HPS5, GTF2H1	Blood protein levels	28240269	Suhre K
No	ZH38T0007974	Proximal	Verified unannotated TSS	rs3802967	HPS5	HPS5	Blood metabolite levels	24816252	Shin SY
No	ZH38T0007974	Proximal	Verified unannotated TSS	rs3802967	HPS5	HPS5, GTF2H1	Blood metabolite ratios	24816252	Shin SY
No	ZH38T0007974	Proximal	Verified unannotated TSS	rs3802967	HPS5	HPS5, GTF2H1	Serum metabolite levels	23093944	Krumsiek J
Yes	ZH38T0007975	TSS	Verified GENCODE TSS	rs3802967	GTF2H1	HPS5	Blood metabolite levels	24816252	Shin SY
No	ZH38T0007975	TSS	Verified GENCODE TSS	rs3802967	GTF2H1	HPS5, GTF2H1	Blood metabolite ratios	24816252	Shin SY
No	ZH38T0007975	TSS	Verified GENCODE TSS	rs3802967	GTF2H1	HPS5, GTF2H1	Serum metabolite levels	23093944	Krumsiek J
Yes	ZH38T0008080	TSS	Verified GENCODE TSS	rs4923458	LINC00678	BDNF-AS, NR, BDNF	Body mass index	26426971	Winkler TW
Yes	ZH38T0008080	TSS	Verified GENCODE TSS	rs4923458	LINC00678	BDNF-AS, BDNF	Hand grip strength	29691431	Tikkanen E
Yes	ZH38T0008080	TSS	Verified GENCODE TSS	rs4923458	LINC00678	BDNF	Body mass index	20935630	Speliotes EK
Yes	ZH38T0008080	TSS	Verified GENCODE TSS	rs4923458	LINC00678	BDNF	Obesity; Obesity; Obesity; Body mass index	23563607	Berndt SI
Yes	ZH38T0008080	TSS	Verified GENCODE TSS	rs4923458	LINC00678	BDNF-AS, BDNF	Body mass index	26961502	Wood AR
Yes	ZH38T0008103	TSS	Verified GENCODE TSS	rs2295748	IMMP1L	ELP4	Optic disc area; Optic disc area	25631615	Springelkamp H
No	ZH38T0008151	TSS	Verified GENCODE TSS	rs2273799	LMO2	LMO2	Mean corpuscular hemoglobin; Red blood cell count; Mean corpuscular volume	27863252	Astle WJ
No	ZH38T0008151	TSS	Verified GENCODE TSS	rs2273799	LMO2	LMO2	Mean corpuscular hemoglobin; Red blood cell count; Mean corpuscular volume	27863252	Astle WJ
No	ZH38T0008271	Intron	Verified unannotated TSS	rs148683230	PHF21A	Intergenic, PHF21A	Educational attainment (MTAG)	30038396	Lee JJ
Yes	ZH38T0008323	Intron	Verified unannotated TSS	rs10769263	SPI1	SLC39A13, PSMC3, RAPSN	Diastolic blood pressure; Systolic blood pressure	28739976	Wain LV
Yes	ZH38T0008323	Intron	Verified unannotated TSS	rs10769263	AC090559.1	SLC39A13, PSMC3, RAPSN	Diastolic blood pressure; Systolic blood pressure	28739976	Wain LV
Yes	ZH38T0008323	Intron	Verified unannotated TSS	rs10769263	SPI1	SLC39A13, PSMC3, RAPSN	Diastolic blood pressure; Systolic blood pressure	28739976	Wain LV
Yes	ZH38T0008323	Intron	Verified unannotated TSS	rs10769263	AC090559.1	SLC39A13, PSMC3, RAPSN	Diastolic blood pressure; Systolic blood pressure	28739976	Wain LV
Yes	ZH38T0008323	Intron	Verified unannotated TSS	rs10769263	SPI1	SLC39A13, PSMC3, RAPSN	Systolic blood pressure; Diastolic blood pressure	27618452	Ehret GB
Yes	ZH38T0008323	Intron	Verified unannotated TSS	rs10769263	AC090559.1	SLC39A13, PSMC3, RAPSN	Systolic blood pressure; Diastolic blood pressure	27618452	Ehret GB
Yes	ZH38T0008323	Intron	Verified unannotated TSS	rs10769263	SPI1	SLC39A13, PSMC3, RAPSN	Systolic blood pressure; Diastolic blood pressure	27618452	Ehret GB
Yes	ZH38T0008323	Intron	Verified unannotated TSS	rs10769263	AC090559.1	SLC39A13, PSMC3, RAPSN	Systolic blood pressure; Diastolic blood pressure	27618452	Ehret GB
Yes	ZH38T0008326	TSS	Verified GENCODE TSS	rs7948705	PSMC3	RAPSN	Mean corpuscular hemoglobin	27863252	Astle WJ
Yes	ZH38T0008568	Intron	Verified unannotated TSS	rs174528	MYRF	FADS1	Total cholesterol levels; High density lipoprotein cholesterol levels	29615537	Kulminski AM
Yes	ZH38T0008568	Intron	Verified unannotated TSS	rs174528	MYRF	FADS1	Resting heart rate	20639392	Eijgelsheim M
Yes	ZH38T0008568	Intron	Verified unannotated TSS	rs174528	MYRF	FADS1, FADS3, FADS2	Lipid metabolism phenotypes	22286219	Kettunen J
Yes	ZH38T0008568	Intron	Verified unannotated TSS	rs174528	MYRF	FADS1, FADS3, FADS2, TMEM258	Phospholipid levels (plasma)	22359512	Demirkan A
Yes	ZH38T0008568	Intron	Verified unannotated TSS	rs174528	MYRF	FADS1, NR	Delta-6 desaturase activity	26584805	Dorajoo R
Yes	ZH38T0008568	Intron	Verified unannotated TSS	rs174528	MYRF	FADS1, NR	Plasma omega-6 polyunsaturated fatty acid levels (dihomo-gamma-linolenic acid); Delta-6 desaturase activity	26584805	Dorajoo R
Yes	ZH38T0008568	Intron	Verified unannotated TSS	rs174528	MYRF	NR, FADS2	Inflammatory bowel disease	26192919	Liu JZ
Yes	ZH38T0008568	Intron	Verified unannotated TSS	rs174528	MYRF	FADS2	Glycated hemoglobin levels	24647736	Chen P
Yes	ZH38T0008568	Intron	Verified unannotated TSS	rs174528	MYRF	FADS1, TMEM258	Blood metabolite levels	24816252	Shin SY
Yes	ZH38T0008568	Intron	Verified unannotated TSS	rs174528	MYRF	FADS1	Blood metabolite levels; Blood metabolite ratios	24816252	Shin SY
Yes	ZH38T0008568	Intron	Verified unannotated TSS	rs174528	MYRF	FADS1	Blood metabolite levels	24816252	Shin SY
Yes	ZH38T0008568	Intron	Verified unannotated TSS	rs174528	MYRF	FADS1	Blood metabolite levels	24816252	Shin SY
Yes	ZH38T0008568	Intron	Verified unannotated TSS	rs174528	MYRF	FADS1, FADS2	Blood metabolite levels; Blood metabolite levels	24816252	Shin SY
Yes	ZH38T0008568	Intron	Verified unannotated TSS	rs174528	MYRF	C11orf9, FADS2	P wave duration	24850809	Verweij N
Yes	ZH38T0008568	Intron	Verified unannotated TSS	rs174528	MYRF	FADS1	Blood metabolite levels; Blood metabolite ratios	24816252	Shin SY
Yes	ZH38T0008568	Intron	Verified unannotated TSS	rs174528	MYRF	FADS1, C11orf9, FADS2, FEN1	Inflammatory bowel disease	23128233	Jostins L
Yes	ZH38T0008568	Intron	Verified unannotated TSS	rs174528	MYRF	FADS1, FADS3, FADS2	HDL cholesterol levels; Triglyceride levels	28334899	Spracklen CN
Yes	ZH38T0008568	Intron	Verified unannotated TSS	rs174528	MYRF	FADS1, FADS3, FADS2	LDL cholesterol levels; Total cholesterol levels	28334899	Spracklen CN
Yes	ZH38T0008568	Intron	Verified unannotated TSS	rs174528	MYRF	FADS1, FADS3, FADS2	LDL cholesterol levels; Total cholesterol levels	28334899	Spracklen CN
Yes	ZH38T0008568	Intron	Verified unannotated TSS	rs174528	MYRF	FADS1, NR	Age-related diseases, mortality and associated endophenotypes; Age-related disease endophenotypes	27790247	He L
Yes	ZH38T0008568	Intron	Verified unannotated TSS	rs174528	MYRF	FADS1	Homeostasis model assessment of beta-cell function; Fasting blood glucose	20081858	Dupuis J
Yes	ZH38T0008568	Intron	Verified unannotated TSS	rs174528	MYRF	FADS1	Fasting blood glucose; Fasting blood glucose (BMI interaction)	22581228	Manning AK
Yes	ZH38T0008568	Intron	Verified unannotated TSS	rs174528	MYRF	FADS2	Total cholesterol levels; Platelet count	29403010	Kanai M
Yes	ZH38T0008568	Intron	Verified unannotated TSS	rs174528	MYRF	FADS1	Alanine transaminase levels; Triglyceride levels	29403010	Kanai M
Yes	ZH38T0008568	Intron	Verified unannotated TSS	rs174528	MYRF	FADS2	Hemoglobin A1c levels	29403010	Kanai M
Yes	ZH38T0008568	Intron	Verified unannotated TSS	rs174528	MYRF	FADS1, C11orf9, FADS2, FEN1, C11orf10	Serum metabolite levels; Serum metabolite levels; Serum metabolite levels	23093944	Krumsiek J
Yes	ZH38T0008568	Intron	Verified unannotated TSS	rs174528	MYRF	FADS1, FADS2	Serum metabolite levels	23093944	Krumsiek J
Yes	ZH38T0008568	Intron	Verified unannotated TSS	rs174528	MYRF	FADS1, C11orf9, FADS2, FEN1, C11orf10	Serum metabolite levels	23093944	Krumsiek J
No	ZH38T0008568	Intron	Verified unannotated TSS	rs174528	MYRF	FADS1, MYRF, FADS2, FEN1, TMEM258	Crohn's disease	28067908	de Lange KM
No	ZH38T0008568	Intron	Verified unannotated TSS	rs174528	MYRF	FADS1, MYRF	Blood metabolite levels; Blood metabolite levels	24816252	Shin SY
No	ZH38T0008568	Intron	Verified unannotated TSS	rs174528	MYRF	FADS1, FADS3, FADS2, MYRF	LDL cholesterol levels; LDL cholesterol levels; Total cholesterol levels	28334899	Spracklen CN
No	ZH38T0008568	Intron	Verified unannotated TSS	rs174528	MYRF	FADS1, FADS3, FADS2, MYRF	LDL cholesterol levels; LDL cholesterol levels; Total cholesterol levels	28334899	Spracklen CN
No	ZH38T0008568	Intron	Verified unannotated TSS	rs174528	MYRF	MYRF, FADS2	Resting heart rate	29769521	Ramirez J
Yes	ZH38T0008576	TSS	Verified GENCODE TSS	rs174538	TMEM258	FADS1	Total cholesterol levels; High density lipoprotein cholesterol levels	29615537	Kulminski AM
Yes	ZH38T0008576	TSS	Verified GENCODE TSS	rs174538	TMEM258	FADS1	Resting heart rate	20639392	Eijgelsheim M
Yes	ZH38T0008576	TSS	Verified GENCODE TSS	rs174538	TMEM258	FADS1, FADS3, FADS2	Lipid metabolism phenotypes	22286219	Kettunen J
Yes	ZH38T0008576	TSS	Verified GENCODE TSS	rs174538	TMEM258	FADS1, NR	Delta-6 desaturase activity	26584805	Dorajoo R
Yes	ZH38T0008576	TSS	Verified GENCODE TSS	rs174538	TMEM258	FADS1, NR	Plasma omega-6 polyunsaturated fatty acid levels (dihomo-gamma-linolenic acid); Delta-6 desaturase activity	26584805	Dorajoo R
Yes	ZH38T0008576	TSS	Verified GENCODE TSS	rs174538	TMEM258	NR, FADS2	Inflammatory bowel disease	26192919	Liu JZ
Yes	ZH38T0008576	TSS	Verified GENCODE TSS	rs174538	TMEM258	FADS2	Glycated hemoglobin levels	24647736	Chen P
Yes	ZH38T0008576	TSS	Verified GENCODE TSS	rs174538	TMEM258	C11orf9, FADS2	P wave duration	24850809	Verweij N
Yes	ZH38T0008576	TSS	Verified GENCODE TSS	rs174538	TMEM258	FADS1, C11orf9, FADS2, FEN1	Inflammatory bowel disease	23128233	Jostins L
Yes	ZH38T0008576	TSS	Verified GENCODE TSS	rs174538	TMEM258	FADS1, FADS3, FADS2	HDL cholesterol levels; Triglyceride levels	28334899	Spracklen CN
Yes	ZH38T0008576	TSS	Verified GENCODE TSS	rs174538	TMEM258	FADS1, FADS3, FADS2	LDL cholesterol levels; Total cholesterol levels	28334899	Spracklen CN
Yes	ZH38T0008576	TSS	Verified GENCODE TSS	rs174538	TMEM258	FADS1, FADS3, FADS2, MYRF	LDL cholesterol levels; LDL cholesterol levels; Total cholesterol levels	28334899	Spracklen CN
Yes	ZH38T0008576	TSS	Verified GENCODE TSS	rs174538	TMEM258	FADS1, FADS3, FADS2	LDL cholesterol levels; Total cholesterol levels	28334899	Spracklen CN
Yes	ZH38T0008576	TSS	Verified GENCODE TSS	rs174538	TMEM258	FADS1, FADS3, FADS2, MYRF	LDL cholesterol levels; LDL cholesterol levels; Total cholesterol levels	28334899	Spracklen CN
Yes	ZH38T0008576	TSS	Verified GENCODE TSS	rs174538	TMEM258	FADS1, NR	Age-related diseases, mortality and associated endophenotypes; Age-related disease endophenotypes	27790247	He L
Yes	ZH38T0008576	TSS	Verified GENCODE TSS	rs174538	TMEM258	FADS1	Homeostasis model assessment of beta-cell function; Fasting blood glucose	20081858	Dupuis J
Yes	ZH38T0008576	TSS	Verified GENCODE TSS	rs174538	TMEM258	FADS1	Fasting blood glucose; Fasting blood glucose (BMI interaction)	22581228	Manning AK
Yes	ZH38T0008576	TSS	Verified GENCODE TSS	rs174538	TMEM258	FADS2	Total cholesterol levels; Platelet count	29403010	Kanai M
Yes	ZH38T0008576	TSS	Verified GENCODE TSS	rs174538	TMEM258	FADS1	Alanine transaminase levels; Triglyceride levels	29403010	Kanai M
Yes	ZH38T0008576	TSS	Verified GENCODE TSS	rs174538	TMEM258	MYRF, FADS2	Resting heart rate	29769521	Ramirez J
Yes	ZH38T0008576	TSS	Verified GENCODE TSS	rs174538	TMEM258	FADS2	Hemoglobin A1c levels	29403010	Kanai M
Yes	ZH38T0008576	TSS	Verified GENCODE TSS	rs174538	TMEM258	FADS1, C11orf9, FADS2, FEN1, C11orf10	Serum metabolite levels; Serum metabolite levels; Serum metabolite levels	23093944	Krumsiek J
Yes	ZH38T0008576	TSS	Verified GENCODE TSS	rs174538	TMEM258	FADS1, C11orf9, FADS2, FEN1, C11orf10	Serum metabolite levels	23093944	Krumsiek J
No	ZH38T0008576	TSS	Verified GENCODE TSS	rs174538	TMEM258	FADS1, MYRF, FADS2, FEN1, TMEM258	Crohn's disease	28067908	de Lange KM
No	ZH38T0008576	TSS	Verified GENCODE TSS	rs174538	TMEM258	FADS1, FADS3, FADS2, TMEM258	Phospholipid levels (plasma)	22359512	Demirkan A
No	ZH38T0008576	TSS	Verified GENCODE TSS	rs174538	TMEM258	FADS1, TMEM258	Blood metabolite levels	24816252	Shin SY
No	ZH38T0008582	Proximal	Verified unannotated TSS	rs968567	FADS2	FADS1, FADS2	Blood metabolite levels; Blood metabolite levels	24816252	Shin SY
Yes	ZH38T0008628	Proximal	Verified unannotated TSS	rs1061093	EEF1G	AHNAK	Lung function (FEV1)	28166213	Wain LV
Yes	ZH38T0008751	Proximal	Verified unannotated TSS	rs4672	AP001453.5	Intergenic, FKBP2	Cognitive performance (MTAG)	30038396	Lee JJ
No	ZH38T0008751	Proximal	Verified unannotated TSS	rs4672	FKBP2	Intergenic, FKBP2	Cognitive performance (MTAG)	30038396	Lee JJ
Yes	ZH38T0008753	Proximal	Verified unannotated TSS	rs60031276	PPP1R14B	LOC102723878, RPS6KA4	Primary biliary cirrhosis	22961000	Liu JZ
Yes	ZH38T0008759	Intron	Verified unannotated TSS	rs602534	AP001453.4	LOC102723878, RPS6KA4	Primary biliary cirrhosis	22961000	Liu JZ
Yes	ZH38T0008783	TSS	Verified GENCODE TSS	rs663743	CCDC88B	LOC102723878, RPS6KA4	Primary biliary cirrhosis	22961000	Liu JZ
Yes	ZH38T0008783	TSS	Verified GENCODE TSS	rs663743	CCDC88B	NR, LOC102723878	Non-melanoma skin cancer	29739929	Visconti A
No	ZH38T0008783	TSS	Verified GENCODE TSS	rs663743	CCDC88B	CCDC88B	Primary biliary cholangitis	26394269	Cordell HJ
No	ZH38T0008783	TSS	Verified GENCODE TSS	rs663743	CCDC88B	CCDC88B, LOC102723878	Primary sclerosing cholangitis	27992413	Ji SG
Yes	ZH38T0008903	TSS	Verified GENCODE TSS	rs3200401	MALAT1	LOC101927789 - LOC105369346, SCYL1	Vertical cup-disc ratio	20548946	Ramdas WD
No	ZH38T0008907	Intron	Verified unannotated TSS	rs71462347	LTBP3	, Intergenic, LTBP3 - SSSCA1-AS1	Educational attainment (MTAG); Educational attainment (years of education)	30038396	Lee JJ
No	ZH38T0008915	TSS	Verified GENCODE TSS	rs3814752	KCNK7	MAP3K11, KCNK7 - MAP3K11	Type 2 diabetes	28566273	Scott RA
No	ZH38T0008915	TSS	Verified GENCODE TSS	rs3814752	KCNK7	KCNK7, EHBP1L1, EHBP1L1 - KCNK7	Rosacea symptom severity	29771307	Aponte JL
No	ZH38T0008916	TSS	Verified GENCODE TSS	rs2306361	MAP3K11	MAP3K11	Mean platelet volume	27863252	Astle WJ
No	ZH38T0008926	TSS	Verified GENCODE TSS	rs2236682	KAT5	OVOL1, KRT8P26 - AP5B1, KAT5, RNASEH2C	Chronic kidney disease	20383146	Kottgen A
Yes	ZH38T0008961	TSS	Verified GENCODE TSS	rs147545467	BANF1	EIF1AD, CST6	Blood protein levels; Blood protein levels	29875488	Sun BB
Yes	ZH38T0009128	TSS	Verified GENCODE TSS	rs55911137	CCND1	ORAOV1, ORAOV1 - FGF19	Major depressive disorder	29317602	Hall LS
Yes	ZH38T0009152	TSS	Verified GENCODE TSS	rs4944946	DHCR7	intergenic, NADSYN1	Vitamin D levels	28757204	Manousaki D
No	ZH38T0009152	TSS	Verified GENCODE TSS	rs4944946	DHCR7	NADSYN1, DHCR7	Systemic lupus erythematosus	26502338	Bentham J
No	ZH38T0009152	TSS	Verified GENCODE TSS	rs4944946	DHCR7	NADSYN1, DHCR7	Vitamin D insufficiency	20541252	Wang TJ
No	ZH38T0009152	TSS	Verified GENCODE TSS	rs4944946	DHCR7	NADSYN1, DHCR7	Vitamin D levels	29343764	Jiang X
Yes	ZH38T0009153	TSS	Verified GENCODE TSS	rs28364617	AP002387.2	NADSYN1, DHCR7	Systemic lupus erythematosus	26502338	Bentham J
Yes	ZH38T0009153	TSS	Verified GENCODE TSS	rs28364617	AP002387.2	NADSYN1, DHCR7	Vitamin D insufficiency	20541252	Wang TJ
Yes	ZH38T0009153	TSS	Verified GENCODE TSS	rs28364617	AP002387.2	intergenic, NADSYN1	Vitamin D levels	28757204	Manousaki D
Yes	ZH38T0009153	TSS	Verified GENCODE TSS	rs28364617	AP002387.2	NADSYN1, DHCR7	Vitamin D levels	29343764	Jiang X
Yes	ZH38T0009208	TSS	Verified GENCODE TSS	rs58249351	ARAP1	STARD10, Intergenic	Highest math class taken; Cognitive performance (MTAG)	30038396	Lee JJ
No	ZH38T0009208	TSS	Verified GENCODE TSS	rs7109575	ARAP1	ARAP1	Type 2 diabetes; Type 2 diabetes	22885922	Morris AP
No	ZH38T0009208	TSS	Verified GENCODE TSS	rs7109575	ARAP1	CENTD2, ARAP1	Type 2 diabetes	20581827	Voight BF
No	ZH38T0009208	TSS	Verified GENCODE TSS	rs7109575	ARAP1	STARD10, CENTD2, ARAP1	Type 2 diabetes	26818947	Imamura M
No	ZH38T0009208	TSS	Verified GENCODE TSS	rs7109575	ARAP1	ARAP1	Fasting blood glucose; Fasting blood glucose (BMI interaction)	22581228	Manning AK
No	ZH38T0009208	TSS	Verified GENCODE TSS	rs58249351	ARAP1	ARAP1	Body mass index	28892062	Akiyama M
No	ZH38T0009208	TSS	Verified GENCODE TSS	rs7109575	ARAP1	ARAP1	Type 2 diabetes	26961502	Wood AR
No	ZH38T0009243	TSS	Verified GENCODE TSS	rs1043234	RAB6A	PLEKHB1, PLEKHB1 - RAB6A	Hand grip strength	27325353	Matteini AM
No	ZH38T0009243	TSS	Verified GENCODE TSS	rs3211165	RAB6A	PLEKHB1, PLEKHB1 - RAB6A	Hand grip strength	27325353	Matteini AM
No	ZH38T0009466	TSS	Verified GENCODE TSS	rs11019400	CTSC	CTSC	Blood protein levels	30072576	Emilsson V
No	ZH38T0009466	TSS	Verified GENCODE TSS	rs11600158	CTSC	CTSC	Blood protein levels	30072576	Emilsson V
Yes	ZH38T0009566	TSS	Verified GENCODE TSS	rs11021319	CEP57	NR, MTMR2	General cognitive ability	29844566	Davies G
No	ZH38T0009566	TSS	Verified GENCODE TSS	rs11021319	CEP57	CEP57	Cognitive ability (MTAG)	29186694	Lam M
No	ZH38T0009566	TSS	Verified GENCODE TSS	rs11021319	CEP57	, CEP57, Intergenic	Educational attainment (MTAG); Educational attainment (years of education)	30038396	Lee JJ
No	ZH38T0009566	TSS	Verified GENCODE TSS	rs11021319	CEP57	CEP57, NR	General cognitive ability	29844566	Davies G
No	ZH38T0009566	TSS	Verified GENCODE TSS	rs11021319	CEP57	CEP57, Intergenic	Highest math class taken (MTAG); Cognitive performance (MTAG)	30038396	Lee JJ
No	ZH38T0009614	TSS	Verified GENCODE TSS	rs11568819	MMP7	MMP7, MMP7 - MMP20	Blood protein levels	28240269	Suhre K
No	ZH38T0009614	TSS	Verified GENCODE TSS	rs11568819	MMP7	MMP7, MMP7 - MMP20	Blood protein levels	30072576	Emilsson V
No	ZH38T0009621	TSS	Verified GENCODE TSS	rs3213460	MMP1	MMP10	Blood protein levels	30072576	Emilsson V
No	ZH38T0009621	TSS	Verified GENCODE TSS	rs3213460	MMP1	MMP10	Blood protein levels	30072576	Emilsson V
No	ZH38T0009621	TSS	Verified GENCODE TSS	rs3213460	MMP1	WTAPP1, MMP10, MMP1	Blood protein levels	30072576	Emilsson V
Yes	ZH38T0009638	Intergenic	Verified unannotated TSS	rs11226348	AP002004.1	NR, LOC102723879	Self-reported risk-taking behaviour	30181555	Strawbridge RJ
Yes	ZH38T0009638	Intergenic	Verified unannotated TSS	rs11226348	AP002004.1	LOC102723879, PDGFD	Self-reported risk-taking behaviour	30271922	Clifton EAD
Yes	ZH38T0009702	Proximal	Verified unannotated TSS	rs10651522	AP003973.2	, RNA5SP350 - LOC105369490, Intergenic	Educational attainment (MTAG); Educational attainment (years of education)	30038396	Lee JJ
Yes	ZH38T0009702	Proximal	Verified unannotated TSS	rs10651522	LINC02550	, RNA5SP350 - LOC105369490, Intergenic	Educational attainment (MTAG); Educational attainment (years of education)	30038396	Lee JJ
Yes	ZH38T0009778	TSS	Verified GENCODE TSS	rs7111153	AP000802.1	Intergenic, LOC101928847, NCAM1	Self-reported math ability (MTAG); Self-reported math ability	30038396	Lee JJ
Yes	ZH38T0009778	TSS	Verified GENCODE TSS	rs7111153	AP000802.1	NR, LOC105369498 - LOC101928847	General cognitive ability	29844566	Davies G
Yes	ZH38T0009778	TSS	Verified GENCODE TSS	rs7111153	AP000802.1	Intergenic, LOC105369498 - LOC101928847	Cognitive performance (MTAG)	30038396	Lee JJ
Yes	ZH38T0009829	Intron	Verified unannotated TSS	rs11215034	NXPE1	NXPE2, NXPE4	Blood protein levels	29875488	Sun BB
Yes	ZH38T0009830	Intron	Verified unannotated TSS	rs494754	NXPE1	NR, NXPE2	Ulcerative colitis; Inflammatory bowel disease	26192919	Liu JZ
Yes	ZH38T0009830	Intron	Verified unannotated TSS	rs7127901	NXPE1	NXPE2, NXPE4	Blood protein levels	29875488	Sun BB
Yes	ZH38T0009833	TSS	Verified GENCODE TSS	rs661946	NXPE1	NR, NXPE2	Ulcerative colitis; Inflammatory bowel disease	26192919	Liu JZ
No	ZH38T0009856	TSS	Verified GENCODE TSS	rs651821	APOA5	APOA4, APOA5, APOA1, APOC3	Lipid metabolism phenotypes	22286219	Kettunen J
No	ZH38T0009856	TSS	Verified GENCODE TSS	rs651821	APOA5	APOA5	HDL Cholesterol - Triglycerides (HDLC-TG); Metabolic syndrome; Triglycerides-Blood Pressure (TG-BP); Waist Circumference - Triglycerides (WC-TG)	21386085	Kraja AT
No	ZH38T0009856	TSS	Verified GENCODE TSS	rs651821	APOA5	APOA4, APOA5, APOA1, APOC3	HDL cholesterol levels	28334899	Spracklen CN
No	ZH38T0009856	TSS	Verified GENCODE TSS	rs651821	APOA5	APOA4, APOA5, ZPR1, APOA1, APOC3	LDL cholesterol levels; Total cholesterol levels; Total cholesterol levels	28334899	Spracklen CN
No	ZH38T0009856	TSS	Verified GENCODE TSS	rs651821	APOA5	APOA4, APOA5, ZPR1, APOA1, APOC3	LDL cholesterol levels; Total cholesterol levels; Total cholesterol levels	28334899	Spracklen CN
No	ZH38T0009856	TSS	Verified GENCODE TSS	rs651821	APOA5	APOA5	Hematocrit; Mean corpuscular volume; Mean corpuscular hemoglobin concentration; Triglyceride levels	29403010	Kanai M
Yes	ZH38T0009859	TSS	Verified GENCODE TSS	rs2849167	AP006216.2	APOA4, APOA5 - APOA4	Apolipoprotein A-IV levels	27412012	Lamina C
No	ZH38T0009867	TSS	Verified GENCODE TSS	rs670	APOA1	SIK3, AP000936.4, AP000936.1, AP000936.2, APOA1-AS, SIK3-IT1, RNY4P6	Blood protein levels	28240269	Suhre K
No	ZH38T0009867	TSS	Verified GENCODE TSS	rs670	APOA1	APOA1-AS, APOA1	Blood protein levels	29875488	Sun BB
Yes	ZH38T0009917	Proximal	Verified unannotated TSS	rs1715429	JAML	NR, MPZL3	Blood protein levels	29875488	Sun BB
No	ZH38T0010157	TSS	Verified GENCODE TSS	rs112771035	ST3GAL4	ST3GAL4-AS1, ST3GAL4	LDL cholesterol levels	28334899	Spracklen CN
No	ZH38T0010158	Intron	Verified unannotated TSS	rs60648773	ST3GAL4	ST3GAL4	Total cholesterol levels	28334899	Spracklen CN
No	ZH38T0010158	Intron	Verified unannotated TSS	rs60648773	ST3GAL4	ST3GAL4	Blood protein levels	29875488	Sun BB
No	ZH38T0010160	Proximal	Verified unannotated TSS	rs10893506	ST3GAL4	ST3GAL4	Mean platelet volume; Platelet distribution width	27863252	Astle WJ
No	ZH38T0010160	Proximal	Verified unannotated TSS	rs10893506	ST3GAL4	ST3GAL4	Mean platelet volume; Platelet distribution width	27863252	Astle WJ
Yes	ZH38T0010449	TSS	Verified GENCODE TSS	rs10849448	AC005840.1	LTBR, TNFRSF1A; LTBR, SCNN1A, TNFRSF1A	Primary biliary cirrhosis; Primary biliary cirrhosis; Primary biliary cirrhosis	22961000	Liu JZ
No	ZH38T0010522	TSS	Verified GENCODE TSS	rs2071066	TPI1	CDCA3, TPI1	Blood protein levels	30072576	Emilsson V
Yes	ZH38T0010523	TSS	Verified GENCODE TSS	rs3825335	SPSB2	CDCA3, TPI1	Blood protein levels	30072576	Emilsson V
Yes	ZH38T0010529	TSS	Verified GENCODE TSS	rs2239164	ENO2	CDCA3, TPI1	Blood protein levels	30072576	Emilsson V
Yes	ZH38T0010598	Intergenic	Verified unannotated TSS	rs752452	NIFKP3	CD163, LOC100131676 - APOBEC1, APOBEC1	HDL cholesterol levels	28334899	Spracklen CN
Yes	ZH38T0010598	Intergenic	Verified unannotated TSS	rs752452	CD163	NR, GAPDHP31 - NIFKP3	Lactate dehydrogenase levels	29403010	Kanai M
No	ZH38T0010598	Intergenic	Verified unannotated TSS	rs752452	CD163	CD163, LOC100131676 - APOBEC1, APOBEC1	HDL cholesterol levels	28334899	Spracklen CN
No	ZH38T0010598	Intergenic	Verified unannotated TSS	rs752452	NIFKP3	NR, GAPDHP31 - NIFKP3	Lactate dehydrogenase levels	29403010	Kanai M
No	ZH38T0010708	TSS	Verified GENCODE TSS	rs11379994	CLEC1B	CLEC12A, CLEC1B	Blood protein levels	30072576	Emilsson V
No	ZH38T0010710	Proximal	Verified unannotated TSS	rs1359082	CLEC12B	CLEC12B, CLEC12A	Blood protein levels	30072576	Emilsson V
No	ZH38T0010710	Proximal	Verified unannotated TSS	rs1359083	CLEC12B	CLEC12B, CLEC12A	Blood protein levels	30072576	Emilsson V
Yes	ZH38T0010786	TSS	Verified GENCODE TSS	rs34330	AC008115.3	CDKN1B	Systemic lupus erythematosus	23273568	Yang W
No	ZH38T0010786	TSS	Verified GENCODE TSS	rs34330	CDKN1B	CDKN1B	Systemic lupus erythematosus	23273568	Yang W
Yes	ZH38T0010842	TSS	Verified GENCODE TSS	rs1800801	MGP	ART4	Hand grip strength	29691431	Tikkanen E
Yes	ZH38T0010842	TSS	Verified GENCODE TSS	rs1800801	MGP	ART4	Blood protein levels	29875488	Sun BB
No	ZH38T0010842	TSS	Verified GENCODE TSS	rs1800801	MGP	MGP - ERP27, ERP27	Hand grip strength	29313844	Willems SM
No	ZH38T0010842	TSS	Verified GENCODE TSS	rs1800801	MGP	ART4, ART4 - MGP	Blood protein levels; Blood protein levels	30072576	Emilsson V
No	ZH38T0010842	TSS	Verified GENCODE TSS	rs1800801	MGP	MGP, MGP - ERP27	Blood protein levels; Blood protein levels	30072576	Emilsson V
No	ZH38T0010847	TSS	Verified GENCODE TSS	rs11056243	ERP27	MGP, MGP - ERP27	Blood protein levels; Blood protein levels	30072576	Emilsson V
No	ZH38T0010847	TSS	Verified GENCODE TSS	rs11056244	ERP27	MGP, MGP - ERP27	Blood protein levels; Blood protein levels	30072576	Emilsson V
No	ZH38T0010859	TSS	Verified GENCODE TSS	rs73057219	PTPRO	, Intergenic, METTL8P1 - PTPRO	Educational attainment (MTAG); Educational attainment (years of education)	30038396	Lee JJ
No	ZH38T0010859	TSS	Verified GENCODE TSS	rs73057219	PTPRO	PTPRO	General cognitive ability	29844566	Davies G
No	ZH38T0010925	Intergenic	Verified unannotated TSS	rs7134375	PDE3A	LOC105369687 - LOC105369688, PDE3A	HDL cholesterol levels	28334899	Spracklen CN
Yes	ZH38T0010939	Intron	Verified unannotated TSS	rs57743625	SLCO1B1	NR, SLCO1B7 - SLCO1A2	Blood metabolite levels	25898920	Korostishevsky M
No	ZH38T0010939	Intron	Verified unannotated TSS	rs57743625	SLCO1B1	SLCO1B1, SLCO1B7 - SLCO1A2	Blood metabolite levels; Blood metabolite levels; Blood metabolite levels	24816252	Shin SY
No	ZH38T0010939	Intron	Verified unannotated TSS	rs57743625	SLCO1B1	SLCO1B1, SLCO1B7 - SLCO1A2	Blood metabolite levels; Blood metabolite levels; Blood metabolite levels	24816252	Shin SY
No	ZH38T0010939	Intron	Verified unannotated TSS	rs57743625	SLCO1B1	SLCO1B1, SLCO1B7 - SLCO1A2	Clinical laboratory measurements	27897004	Verma SS
No	ZH38T0010939	Intron	Verified unannotated TSS	rs57743625	SLCO1B1	SLCO1B1, SLCO1B7 - SLCO1A2	Serum metabolite levels	23093944	Krumsiek J
No	ZH38T0010941	TSS	Verified GENCODE TSS	rs183429026	SLCO1A2	RECQL, IAPP, SLCO1A2	Blood protein levels	30072576	Emilsson V
No	ZH38T0011118	TSS	Verified GENCODE TSS	rs11052033	FGD4	FGD4	Mean platelet volume	27863252	Astle WJ
Yes	ZH38T0011230	TSS	Verified GENCODE TSS	rs2074193	LINC02156	intergenic, LOC107984528 - LOC100288129	Migraine with aura	23793025	Anttila V
Yes	ZH38T0011252	Proximal	Verified unannotated TSS	rs2408955	PFKM	RP1- 228P16.4, LOC105369750	Glycated hemoglobin levels	28887542	Prins BP
Yes	ZH38T0011340	TSS	Verified GENCODE TSS	rs202066295	FMNL3	TMBIM6	General cognitive ability	29844566	Davies G
No	ZH38T0011375	TSS	Verified GENCODE TSS	rs61926301	ATF1	, Intergenic, DIP2B - ATF1	Educational attainment (MTAG); Educational attainment (years of education)	30038396	Lee JJ
Yes	ZH38T0011377	Proximal	Verified unannotated TSS	rs111941917	ATF1	DIP2B	Fibrinogen levels	26561523	de Vries PS
No	ZH38T0011432	TSS	Verified GENCODE TSS	rs2272482	ATG101	C12orf44, NR4A1 - ATG101	Mean corpuscular hemoglobin; Mean corpuscular volume	27863252	Astle WJ
No	ZH38T0011432	TSS	Verified GENCODE TSS	rs2272482	ATG101	C12orf44, NR4A1 - ATG101	Mean corpuscular hemoglobin; Mean corpuscular volume	27863252	Astle WJ
Yes	ZH38T0011433	TSS	Verified GENCODE TSS	rs10876233	AC025259.1	C12orf44, NR4A1 - ATG101	Mean corpuscular hemoglobin; Mean corpuscular volume	27863252	Astle WJ
Yes	ZH38T0011433	TSS	Verified GENCODE TSS	rs10876233	AC025259.1	C12orf44, NR4A1 - ATG101	Mean corpuscular hemoglobin; Mean corpuscular volume	27863252	Astle WJ
Yes	ZH38T0011526	TSS	Verified unannotated TSS	rs34628172	ZNF740	Intergenic, VTI1BP3	Educational attainment (MTAG); Highest math class taken (MTAG)	30038396	Lee JJ
Yes	ZH38T0011527	TSS	Verified GENCODE TSS	rs34628172	CSAD	Intergenic, VTI1BP3	Educational attainment (MTAG); Highest math class taken (MTAG)	30038396	Lee JJ
No	ZH38T0011622	TSS	Verified GENCODE TSS	rs4759073	CBX5	, Intergenic, CBX5	Educational attainment (MTAG); Highest math class taken (MTAG); Educational attainment (years of education)	30038396	Lee JJ
Yes	ZH38T0011725	Proximal	Verified unannotated TSS	rs1131017	RPS26	IKZF4, LOC105369781, LOC105369780	Cognitive ability (MTAG)	29186694	Lam M
Yes	ZH38T0011725	Proximal	Verified unannotated TSS	rs1131017	RPS26	ERBB3, RAB5B, CDK2, LOC105369781, IKZF4, SUOX	Type 1 diabetes	18198356	Hakonarson H
Yes	ZH38T0011725	Proximal	Verified unannotated TSS	rs1131017	RPS26	IKZF4, LOC105369781	Type 1 diabetes	21829393	Plagnol V
No	ZH38T0011725	Proximal	Verified unannotated TSS	rs1131017	RPS26	RPS26	Inflammatory skin disease	25574825	Baurecht H
No	ZH38T0011725	Proximal	Verified unannotated TSS	rs1131017	RPS26	ERBB3, RPS26 - ERBB3	Polycystic ovary syndrome	26416764	Day FR
No	ZH38T0011725	Proximal	Verified unannotated TSS	rs1131017	RPS26	RPS26 - ERBB3, Intergenic	Self-reported math ability	30038396	Lee JJ
No	ZH38T0011725	Proximal	Verified unannotated TSS	rs1131017	RPS26	RPS26, Intergenic	Self-reported math ability (MTAG); Cognitive performance; Cognitive performance (MTAG)	30038396	Lee JJ
Yes	ZH38T0011777	TSS	Verified GENCODE TSS	rs80317430	PAN2	STAT2	Inflammatory skin disease	25574825	Baurecht H
Yes	ZH38T0011777	TSS	Verified GENCODE TSS	rs80317430	PAN2	CS	Inflammatory skin disease	25574825	Baurecht H
Yes	ZH38T0011777	TSS	Verified GENCODE TSS	rs80317430	PAN2	APOF, ANKRD52	Blood protein levels	30072576	Emilsson V
Yes	ZH38T0011795	Proximal	Verified unannotated TSS	rs1107479	BAZ2A	ATP5B	Platelet distribution width	27863252	Astle WJ
Yes	ZH38T0011795	Proximal	Verified unannotated TSS	rs1107479	BAZ2A	NACA, PTGES3 - NACA	Diastolic blood pressure	30224653	Evangelou E
No	ZH38T0011795	Proximal	Verified unannotated TSS	rs1107479	BAZ2A	PTGES3, BAZ2A, ATP5B - PTGES3	Mean platelet volume	22139419	Gieger C
No	ZH38T0011795	Proximal	Verified unannotated TSS	rs1107479	BAZ2A	BAZ2A	Mean platelet volume	27863252	Astle WJ
Yes	ZH38T0011808	TSS	Verified GENCODE TSS	rs3214051	NACA	PTGES3, BAZ2A, ATP5B - PTGES3	Mean platelet volume	22139419	Gieger C
Yes	ZH38T0011808	TSS	Verified GENCODE TSS	rs3214051	NACA	ATP5B	Platelet distribution width	27863252	Astle WJ
No	ZH38T0011808	TSS	Verified GENCODE TSS	rs3214051	NACA	NACA, PTGES3 - NACA	Diastolic blood pressure	30224653	Evangelou E
No	ZH38T0011809	TSS	Verified GENCODE TSS	rs2277339	PRIM1	PRIM1	Mean corpuscular volume; Plateletcrit	27863252	Astle WJ
No	ZH38T0011894	TSS	Verified GENCODE TSS	rs10437954	ARHGEF25	DTX3 - ARHGEF25, ARHGEF25	Systolic blood pressure	30224653	Evangelou E
Yes	ZH38T0011930	TSS	Verified GENCODE TSS	rs3751327	ATP23	LOC101927608, , Intergenic	Educational attainment (MTAG); Educational attainment (years of education)	30038396	Lee JJ
Yes	ZH38T0011930	TSS	Verified GENCODE TSS	rs3751327	ATP23	NR, LOC101927608 - LOC100506844	General cognitive ability	29844566	Davies G
Yes	ZH38T0011930	TSS	Verified GENCODE TSS	rs3751327	ATP23	LOC101927608, Intergenic	Cognitive performance (MTAG)	30038396	Lee JJ
Yes	ZH38T0012283	Proximal	Verified unannotated TSS	rs11105310	POC1B-AS1	RP11-734K2.3, RP11-734K2.4, POC1B, POC1B-GALNT4, CENPCP1, GALNT4	Blood protein levels	28240269	Suhre K
No	ZH38T0012302	TSS	Verified GENCODE TSS	rs2070985	DCN	DCN	Blood protein levels	30072576	Emilsson V
Yes	ZH38T0012384	TSS	Verified GENCODE TSS	rs7970524	HAL	LTA4H	Blood protein levels	30072576	Emilsson V
Yes	ZH38T0012385	TSS	Verified GENCODE TSS	rs7134860	AC007298.1	LTA4H	Blood protein levels	30072576	Emilsson V
Yes	ZH38T0012385	TSS	Verified GENCODE TSS	rs7134860	AC007298.2	LTA4H	Blood protein levels	30072576	Emilsson V
No	ZH38T0012432	Intron	Verified unannotated TSS	rs117151379	SLC17A8	NR1H4, SCYL2, SLC17A8 - NR1H4, SLC17A8, GAS2L3	Squamous cell carcinoma	23341777	Dong J
No	ZH38T0012474	TSS	Verified GENCODE TSS	rs35767	IGF1	IGF1	Fasting blood insulin; Homeostasis model assessment of insulin resistance	20081858	Dupuis J
No	ZH38T0012474	TSS	Verified GENCODE TSS	rs35767	IGF1	LOC105369944, IGF1	Fasting blood insulin; Fasting blood insulin (BMI interaction)	22581228	Manning AK
Yes	ZH38T0012499	TSS	Verified GENCODE TSS	rs703657	C12orf73	HSP90B1	Blood protein levels	29875488	Sun BB
No	ZH38T0012499	TSS	Verified GENCODE TSS	rs703657	C12orf73	C12orf73, HSP90B1	Blood protein levels; Blood protein levels	30072576	Emilsson V
No	ZH38T0012545	TSS	Verified GENCODE TSS	rs11831752	TCP11L2	NR, RNU7-94P - TCP11L2	General cognitive ability	29844566	Davies G
Yes	ZH38T0012592	Proximal	Verified unannotated TSS	rs11114041	CORO1C	SSH1 - DAO, NR	General cognitive ability	#VALUE!	Davies G
No	ZH38T0012592	Proximal	Verified unannotated TSS	rs11114041	CORO1C	CORO1C, NR	General cognitive ability	29844566	Davies G
No	ZH38T0012592	Proximal	Verified unannotated TSS	rs11114041	CORO1C	CORO1C, Intergenic	Cognitive performance (MTAG)	30038396	Lee JJ
No	ZH38T0012633	TSS	Verified GENCODE TSS	rs10774774	MMAB	MMAB	Age-related nuclear cataracts	24951543	Liao J
No	ZH38T0012633	TSS	Verified GENCODE TSS	rs10774775	MMAB	MMAB	Age-related nuclear cataracts	24951543	Liao J
No	ZH38T0012656	Intron	Verified unannotated TSS	rs7312939	IFT81	NR, IFT81	General cognitive ability	29844566	Davies G
No	ZH38T0012700	TSS	Verified GENCODE TSS	rs151283114	MAPKAPK5-AS1	ALDH2 - MAPKAPK5-AS1, MAPKAPK5-AS1, ALDH2	Body mass index	28892062	Akiyama M
Yes	ZH38T0012730	TSS	Verified GENCODE TSS	rs1859331	OAS3	OAS1	Blood protein levels	29875488	Sun BB
Yes	ZH38T0012730	TSS	Verified GENCODE TSS	rs3815178	OAS3	OAS1	Blood protein levels	29875488	Sun BB
Yes	ZH38T0012730	TSS	Verified GENCODE TSS	rs1859331	OAS3	OAS1	Blood protein levels	30072576	Emilsson V
Yes	ZH38T0012730	TSS	Verified GENCODE TSS	rs3815178	OAS3	OAS1	Blood protein levels	30072576	Emilsson V
No	ZH38T0012730	TSS	Verified GENCODE TSS	rs1859331	OAS3	OAS3	Chronic lymphocytic leukemia	28165464	Law PJ
No	ZH38T0012730	TSS	Verified GENCODE TSS	rs3815178	OAS3	OAS3	Chronic lymphocytic leukemia	28165464	Law PJ
No	ZH38T0012741	TSS	Verified GENCODE TSS	rs2290766	DDX54	TPCN1, CCDC42B, DTX1, PLBD2, SDS, SLC24A6, DDX54, OAS1, OAS3, OAS2, SDSL, IQCD, RASAL1, RPH3A, LHX5, C12orf52	Body mass index	26426971	Winkler TW
Yes	ZH38T0012743	TSS	Verified GENCODE TSS	rs11544008	RITA1	TPCN1, CCDC42B, DTX1, PLBD2, SDS, SLC24A6, DDX54, OAS1, OAS3, OAS2, SDSL, IQCD, RASAL1, RPH3A, LHX5, C12orf52	Body mass index	26426971	Winkler TW
No	ZH38T0012744	TSS	Verified GENCODE TSS	rs61943578	IQCD	TPCN1, CCDC42B, DTX1, PLBD2, SDS, SLC24A6, DDX54, OAS1, OAS3, OAS2, SDSL, IQCD, RASAL1, RPH3A, LHX5, C12orf52	Body mass index	26426971	Winkler TW
No	ZH38T0012778	Intron	Verified unannotated TSS	rs7972416	TESC	TESC	Mean platelet volume	27863252	Astle WJ
No	ZH38T0012866	TSS	Verified GENCODE TSS	rs12857	DYNLL1	Intergenic, DYNLL1	Educational attainment (MTAG)	30038396	Lee JJ
No	ZH38T0012866	TSS	Verified GENCODE TSS	rs580016	DYNLL1	Intergenic, DYNLL1	Educational attainment (MTAG)	30038396	Lee JJ
No	ZH38T0012866	TSS	Verified GENCODE TSS	rs12857	DYNLL1	Intergenic, DYNLL1	Highest math class taken; Self-reported math ability (MTAG); Highest math class taken (MTAG); Cognitive performance (MTAG)	30038396	Lee JJ
No	ZH38T0012866	TSS	Verified GENCODE TSS	rs580016	DYNLL1	Intergenic, DYNLL1	Highest math class taken; Self-reported math ability (MTAG); Highest math class taken (MTAG); Cognitive performance (MTAG)	30038396	Lee JJ
No	ZH38T0012970	TSS	Verified GENCODE TSS	rs61955196	ABCB9	NR, ABCB9	General cognitive ability	29844566	Davies G
Yes	ZH38T0012983	TSS	Verified GENCODE TSS	rs146239222	MPHOSPH9	ENSG00000235423, C12orf65 - CDK2AP1	Cognitive ability (MTAG)	29186694	Lam M
Yes	ZH38T0012983	TSS	Verified GENCODE TSS	rs146239222	MPHOSPH9	, Intergenic, CDK2AP1	Educational attainment (MTAG); Educational attainment (years of education)	#VALUE!	Lee JJ
Yes	ZH38T0012983	TSS	Verified GENCODE TSS	rs146239222	MPHOSPH9	Intergenic, C12orf65	Self-reported math ability	#VALUE!	Lee JJ
Yes	ZH38T0012983	TSS	Verified GENCODE TSS	rs146239222	MPHOSPH9	Intergenic, C12orf65	Cognitive performance (MTAG)	30038396	Lee JJ
No	ZH38T0012983	TSS	Verified GENCODE TSS	rs146239222	MPHOSPH9	MPHOSPH9	Multiple sclerosis	19525953	De Jager PL
No	ZH38T0013024	TSS	Verified GENCODE TSS	rs144997959	NCOR2	NCOR2	Mosquito bite size	28199695	Jones AV
No	ZH38T0013469	Proximal	Verified unannotated TSS	rs3812891	MRPS31	MRPS31, TPTE2P5	Diastolic blood pressure	30224653	Evangelou E
No	ZH38T0013591	Intron	Verified unannotated TSS	rs1409435	CPB2	ZC3H13, CPB2, CPB2-AS1	Blood protein levels; Blood protein levels	28240269	Suhre K
No	ZH38T0013591	Intron	Verified unannotated TSS	rs1409435	CPB2	ZC3H13, CPB2, CPB2-AS1	Blood protein levels	28240269	Suhre K
No	ZH38T0013591	Intron	Verified unannotated TSS	rs1409435	CPB2	CPB2, CPB2-AS1	Blood protein levels	29875488	Sun BB
No	ZH38T0013591	Intron	Verified unannotated TSS	rs1409435	CPB2	CPB2, CPB2-AS1	Blood protein levels; Blood protein levels	29875488	Sun BB
Yes	ZH38T0013670	TSS	Verified GENCODE TSS	rs1063181	SPRYD7	DLEU2, TRIM13	Diastolic blood pressure	30224653	Evangelou E
No	ZH38T0013835	Intergenic	Verified unannotated TSS	rs12428827	KLF12	KLF12, intergenic	Sudden cardiac arrest	21658281	Aouizerat BE
No	ZH38T0013856	TSS	Verified GENCODE TSS	rs7997101	LMO7	LMO7	Type 1 diabetes	21980299	Bradfield JP
No	ZH38T0013954	Intergenic	Verified unannotated TSS	rs138607548	DCT	DCT	Low tan response	29739929	Visconti A
No	ZH38T0013956	Intergenic	Verified unannotated TSS	rs9556391	DCT	DCT	Low tan response	29739929	Visconti A
No	ZH38T0014096	Intron	Verified unannotated TSS	rs9559410	MYO16	MYO16	Mean corpuscular hemoglobin; Mean corpuscular volume	27863252	Astle WJ
No	ZH38T0014096	Intron	Verified unannotated TSS	rs9559410	MYO16	MYO16	Mean corpuscular hemoglobin; Mean corpuscular volume	27863252	Astle WJ
No	ZH38T0014116	TSS	Verified GENCODE TSS	rs7989823	COL4A2	chr13mb110, COL4A2	Diastolic blood pressure	28135244	Warren HR
No	ZH38T0014188	Intron	Verified unannotated TSS	rs9577407	MCF2L	MCF2L	Systolic blood pressure	28135244	Warren HR
No	ZH38T0014195	Proximal	Verified unannotated TSS	rs776906	F10	F10-AS1, KARSP2, F10	Blood protein levels	28240269	Suhre K
No	ZH38T0014294	TSS	Verified GENCODE TSS	rs4982325	ANG	Y_RNA, RP11-903H12.3, ANG, RP11-903H12.5, RNASE4	Blood protein levels	28240269	Suhre K
No	ZH38T0014294	TSS	Verified GENCODE TSS	rs4982325	RNASE4	Y_RNA, RP11-903H12.3, ANG, RP11-903H12.5, RNASE4	Blood protein levels	28240269	Suhre K
Yes	ZH38T0014383	TSS	Verified GENCODE TSS	rs1951119	RBM23	Intergenic, LOC101926933	Educational attainment (MTAG); Cognitive performance (MTAG)	30038396	Lee JJ
Yes	ZH38T0014383	TSS	Verified GENCODE TSS	rs2295683	RBM23	Intergenic, LOC101926933	Educational attainment (MTAG); Cognitive performance (MTAG)	30038396	Lee JJ
Yes	ZH38T0014383	TSS	Verified GENCODE TSS	rs1951119	RBM23	Intergenic, LOC101926933	Educational attainment (MTAG); Cognitive performance (MTAG)	30038396	Lee JJ
Yes	ZH38T0014383	TSS	Verified GENCODE TSS	rs2295683	RBM23	Intergenic, LOC101926933	Educational attainment (MTAG); Cognitive performance (MTAG)	30038396	Lee JJ
No	ZH38T0014383	TSS	Verified GENCODE TSS	rs1951119	RBM23	RBM23	Cognitive ability (MTAG)	29186694	Lam M
No	ZH38T0014383	TSS	Verified GENCODE TSS	rs2295683	RBM23	RBM23	Cognitive ability (MTAG)	29186694	Lam M
Yes	ZH38T0014392	TSS	Verified GENCODE TSS	rs3811183	AL132780.2	RBM23	Cognitive ability (MTAG)	29186694	Lam M
Yes	ZH38T0014392	TSS	Verified GENCODE TSS	rs3811183	AL132780.2	Intergenic, LOC101926933	Educational attainment (MTAG); Cognitive performance (MTAG)	30038396	Lee JJ
Yes	ZH38T0014392	TSS	Verified GENCODE TSS	rs3811183	AL132780.2	Intergenic, LOC101926933	Educational attainment (MTAG); Cognitive performance (MTAG)	30038396	Lee JJ
Yes	ZH38T0014514	TSS	Verified GENCODE TSS	rs28372734	AL096870.1	NEDD8, NEDD8-MDP1	Mean corpuscular volume	29403010	Kanai M
No	ZH38T0014547	TSS	Verified GENCODE TSS	rs2273844	GZMB	GZMB	Blood protein levels; Blood protein levels	29875488	Sun BB
No	ZH38T0014547	TSS	Verified GENCODE TSS	rs2273844	GZMB	LOC107984667, GZMB	Blood protein levels	30072576	Emilsson V
Yes	ZH38T0014695	TSS	Verified GENCODE TSS	rs11558802	MBIP	LOC107984003, Intergenic	Educational attainment (MTAG)	30038396	Lee JJ
Yes	ZH38T0014695	TSS	Verified GENCODE TSS	rs2899849	MBIP	LOC107984003, Intergenic	Educational attainment (MTAG)	30038396	Lee JJ
Yes	ZH38T0014695	TSS	Verified GENCODE TSS	rs3168891	MBIP	LOC107984003, Intergenic	Educational attainment (MTAG)	30038396	Lee JJ
Yes	ZH38T0014701	Proximal	Verified unannotated TSS	rs56249733	NKX2-1	LOC105370453, PHKBP2	General cognitive ability	29844566	Davies G
Yes	ZH38T0014701	Proximal	Verified unannotated TSS	rs56249733	SFTA3	LOC105370453, PHKBP2	General cognitive ability	29844566	Davies G
Yes	ZH38T0014729	TSS	Verified unannotated TSS	rs2277458	SEC23A	GEMIN2, LOC105370459	Vitamin D levels	28757204	Manousaki D
No	ZH38T0014729	TSS	Verified unannotated TSS	rs2277458	SEC23A	SEC23A	Vitamin D levels	29343764	Jiang X
Yes	ZH38T0014730	TSS	Verified GENCODE TSS	rs2277458	GEMIN2	SEC23A	Vitamin D levels	29343764	Jiang X
No	ZH38T0014730	TSS	Verified GENCODE TSS	rs2277458	GEMIN2	GEMIN2, LOC105370459	Vitamin D levels	28757204	Manousaki D
Yes	ZH38T0014732	TSS	Verified GENCODE TSS	rs1061583	PNN	GEMIN2, , Intergenic	Educational attainment (MTAG); Educational attainment (years of education)	30038396	Lee JJ
No	ZH38T0014784	Intron	Verified unannotated TSS	rs4900780	MDGA2	MDGA2	Sexual dysfunction (SSRI/SNRI-related)	22445761	Kurose K
Yes	ZH38T0014934	TSS	Verified GENCODE TSS	rs11547116	FBXO34	LGALS3, LGALS3 - DLGAP5, DLGAP5	Protein biomarker	23056639	de Boer RA
Yes	ZH38T0014936	TSS	Verified GENCODE TSS	rs7146752	FBXO34	LGALS3, LGALS3 - DLGAP5, DLGAP5	Protein biomarker	23056639	de Boer RA
No	ZH38T0014956	TSS	Verified GENCODE TSS	rs61997667	OTX2-AS1	, Intergenic, OTX2-AS1	Educational attainment (MTAG); Highest math class taken (MTAG); Educational attainment (years of education)	30038396	Lee JJ
No	ZH38T0014976	Intron	Verified unannotated TSS	rs10137475	ARID4A	, ARID4A, Intergenic, LOC105370522	Educational attainment (MTAG); Highest math class taken (MTAG); Educational attainment (years of education)	30038396	Lee JJ
No	ZH38T0015154	Proximal	Verified unannotated TSS	rs1051533	ZFP36L1	ZFP36L1	Diastolic blood pressure	30224653	Evangelou E
Yes	ZH38T0015195	TSS	Verified unannotated TSS	rs61980566	ERH	LOC100506358 - SMOC1, SMOC1	Blood protein levels	30072576	Emilsson V
No	ZH38T0015284	Intron	Verified unannotated TSS	rs73301475	ENTPD5	RP5-1021I20.8, ENTPD5, FAM161B, RP5-1021I20.6, AC005480.1, Y_RNA, RP5-1021I20.4, RP5-1021I20.5, CCDC176, RP5-1021I20.7, RN7SL530P, ALDH6A1, PTGR2, COQ6, LIN52, ZNF410	Blood protein levels	28240269	Suhre K
No	ZH38T0015284	Intron	Verified unannotated TSS	rs73301475	ENTPD5	ENTPD5, CCDC176	Blood protein levels	29875488	Sun BB
No	ZH38T0015284	Intron	Verified unannotated TSS	rs73301475	ENTPD5	ENTPD5	Blood protein levels	30072576	Emilsson V
No	ZH38T0015285	TSS	Verified GENCODE TSS	rs113908274	ENTPD5	RP5-1021I20.8, ENTPD5, FAM161B, RP5-1021I20.6, AC005480.1, Y_RNA, RP5-1021I20.4, RP5-1021I20.5, CCDC176, RP5-1021I20.7, RN7SL530P, ALDH6A1, PTGR2, COQ6, LIN52, ZNF410	Blood protein levels	28240269	Suhre K
No	ZH38T0015285	TSS	Verified GENCODE TSS	rs113908274	ENTPD5	ENTPD5, CCDC176	Blood protein levels	29875488	Sun BB
No	ZH38T0015285	TSS	Verified GENCODE TSS	rs113908274	ENTPD5	ENTPD5	Blood protein levels	30072576	Emilsson V
Yes	ZH38T0015311	TSS	Verified GENCODE TSS	rs175498	ZC2HC1C	PGF, NEK9	Blood protein levels	30072576	Emilsson V
No	ZH38T0015401	TSS	Verified GENCODE TSS	rs56711325	NRXN3	Intergenic, NRXN3	Educational attainment (MTAG)	30038396	Lee JJ
No	ZH38T0015612	Intron	Verified unannotated TSS	rs60189618	SERPINA12	SERPINA12, NR	Blood protein levels	29875488	Sun BB
No	ZH38T0015612	Intron	Verified unannotated TSS	rs78913970	SERPINA12	SERPINA12, NR	Blood protein levels	29875488	Sun BB
Yes	ZH38T0015613	TSS	Verified GENCODE TSS	rs882732	SERPINA5	SERPINA4	Blood protein levels; Blood protein levels	29875488	Sun BB
No	ZH38T0015613	TSS	Verified GENCODE TSS	rs882732	SERPINA4	SERPINA12 - SERPINA4, SERPINA4, SERPINA5	Blood protein levels	28240269	Suhre K
No	ZH38T0015613	TSS	Verified GENCODE TSS	rs882732	SERPINA5	SERPINA12 - SERPINA4, SERPINA4, SERPINA5	Blood protein levels	28240269	Suhre K
No	ZH38T0015613	TSS	Verified GENCODE TSS	rs882732	SERPINA4	SERPINA4	Blood protein levels; Blood protein levels	29875488	Sun BB
No	ZH38T0015613	TSS	Verified GENCODE TSS	rs882732	SERPINA4	SERPINA4, SERPINA4 - SERPINA5	Blood protein levels	30072576	Emilsson V
No	ZH38T0015613	TSS	Verified GENCODE TSS	rs882732	SERPINA5	SERPINA4, SERPINA4 - SERPINA5	Blood protein levels	30072576	Emilsson V
No	ZH38T0015613	TSS	Verified GENCODE TSS	rs882732	SERPINA4	SERPINA4, SERPINA4 - SERPINA5	Blood protein levels	30072576	Emilsson V
No	ZH38T0015613	TSS	Verified GENCODE TSS	rs882732	SERPINA5	SERPINA4, SERPINA4 - SERPINA5	Blood protein levels	30072576	Emilsson V
No	ZH38T0015698	TSS	Verified GENCODE TSS	rs7143006	WARS	WARS	Blood protein levels	30072576	Emilsson V
No	ZH38T0015699	TSS	Verified GENCODE TSS	rs2273804	WARS	WARS	Blood protein levels	30072576	Emilsson V
No	ZH38T0015784	TSS	Verified GENCODE TSS	rs1051750	TRAF3	TRAF3	Non-albumin protein levels	29403010	Kanai M
Yes	ZH38T0015843	Proximal	Verified unannotated TSS	rs80097179	ADSSL1	AKT1, SIVA1	Endometrial cancer; Endometrial endometrioid carcinoma	27135401	Cheng TH
Yes	ZH38T0015929	TSS	Verified GENCODE TSS	rs2073679	IGHA1	IGHV3-7, IGH	Blood protein levels	29875488	Sun BB
Yes	ZH38T0015929	TSS	Verified GENCODE TSS	rs2073679	IGHM	IGHV3-7, IGH	Blood protein levels	29875488	Sun BB
Yes	ZH38T0015929	TSS	Verified GENCODE TSS	rs2073679	IGHA1	IGHV3-7, IGH	Blood protein levels	29875488	Sun BB
Yes	ZH38T0015929	TSS	Verified GENCODE TSS	rs2073679	IGHM	IGHV3-7, IGH	Blood protein levels	29875488	Sun BB
No	ZH38T0015929	TSS	Verified GENCODE TSS	rs2073679	IGHV3-7	IGHV3-7, IGH	Blood protein levels	29875488	Sun BB
No	ZH38T0015929	TSS	Verified GENCODE TSS	rs2073679	IGHV3-7	IGHV3-7, IGH	Blood protein levels	29875488	Sun BB
Yes	ZH38T0015979	TSS	Verified GENCODE TSS	rs10220412	IGHV1-69	SLC20A1P1, IGH	Blood protein levels	29875488	Sun BB
Yes	ZH38T0015979	TSS	Verified GENCODE TSS	rs10220412	IGHV1-69	IGHV3-73, IGH	Blood protein levels	29875488	Sun BB
Yes	ZH38T0015979	TSS	Verified GENCODE TSS	rs10220412	IGHV1-69	NR, IGH	Blood protein levels	29875488	Sun BB
No	ZH38T0015979	TSS	Verified GENCODE TSS	rs10220412	IGHV1-69	IGHV1-69, IGH	Blood protein levels	29875488	Sun BB
No	ZH38T0015979	TSS	Verified GENCODE TSS	rs10220412	IGHV1-69	IGHV1-69, IGH	Blood protein levels	29875488	Sun BB
No	ZH38T0015979	TSS	Verified GENCODE TSS	rs4448834	IGHV1-69	IGHV1-69, IGH	Blood protein levels	29875488	Sun BB
No	ZH38T0016086	Intron	Verified unannotated TSS	rs11161343	GABRB3	GABRA5, GABRB3, GABRB3 - RPL9P26	Body mass index	28892062	Akiyama M
No	ZH38T0016319	TSS	Verified GENCODE TSS	rs17733008	KNSTRN	KNSTRN, DISP2 - KNSTRN	Heschl's gyrus morphology	25130324	Cai DC
No	ZH38T0016320	TSS	Verified GENCODE TSS	rs7164132	KNSTRN	KNSTRN, DISP2 - KNSTRN	Heschl's gyrus morphology	25130324	Cai DC
Yes	ZH38T0016447	Proximal	Verified unannotated TSS	rs7174732	CATSPER2P1	chr15mb43, STRCP1	Diastolic blood pressure	28135244	Warren HR
Yes	ZH38T0016522	TSS	Verified unannotated TSS	rs1346266	GATM	SPATA5L1	Urinary albumin excretion	30220432	Haas ME
Yes	ZH38T0016618	TSS	Verified GENCODE TSS	rs2606134	SCG3	DMXL2, Intergenic	Educational attainment (MTAG)	30038396	Lee JJ
Yes	ZH38T0016618	TSS	Verified GENCODE TSS	rs2606134	SCG3	LOC105370816, Intergenic	Cognitive performance (MTAG)	30038396	Lee JJ
No	ZH38T0016618	TSS	Verified GENCODE TSS	rs2606134	SCG3	LOC105370816 - SCG3, SCG3	Blood protein levels	29875488	Sun BB
No	ZH38T0016618	TSS	Verified GENCODE TSS	rs2606134	SCG3	LOC105370816 - SCG3, SCG3	Blood protein levels	30072576	Emilsson V
No	ZH38T0016714	Intron	Verified unannotated TSS	rs12914418	TCF12	TCF12	Body mass index	28892062	Akiyama M
Yes	ZH38T0016842	Proximal	Verified unannotated TSS	rs7170846	RPS27L	LACTB	Blood metabolite levels	24816252	Shin SY
No	ZH38T0016842	Proximal	Verified unannotated TSS	rs7170846	RPS27L	RPS27L, LACTB	Serum metabolite levels	23093944	Krumsiek J
Yes	ZH38T0016843	TSS	Verified GENCODE TSS	rs2292038	RPS27L	LACTB	Blood metabolite levels	24816252	Shin SY
No	ZH38T0016843	TSS	Verified GENCODE TSS	rs2292038	RPS27L	RPS27L, LACTB	Serum metabolite levels	23093944	Krumsiek J
Yes	ZH38T0016920	TSS	Verified GENCODE TSS	rs4366668	INTS14	PTPLAD1, SLC24A1, DPP8, DENND4A, C15orf44, IGDCC4	Mean corpuscular hemoglobin	20139978	Kamatani Y
Yes	ZH38T0016920	TSS	Verified GENCODE TSS	rs4366668	INTS14	RAB11A, DENND4A	Mean corpuscular volume	27863252	Astle WJ
Yes	ZH38T0016923	Intron	Verified unannotated TSS	rs12101597	SLC24A1	RAB11A, DENND4A	Mean corpuscular volume	27863252	Astle WJ
No	ZH38T0016923	Intron	Verified unannotated TSS	rs12101597	SLC24A1	PTPLAD1, SLC24A1, DPP8, DENND4A, C15orf44, IGDCC4	Mean corpuscular hemoglobin	20139978	Kamatani Y
No	ZH38T0016924	TSS	Verified GENCODE TSS	rs1061554	DENND4A	DENND4A	Cognitive ability (MTAG)	29186694	Lam M
No	ZH38T0016924	TSS	Verified GENCODE TSS	rs1369312	DENND4A	DENND4A	Cognitive ability (MTAG)	29186694	Lam M
No	ZH38T0016924	TSS	Verified GENCODE TSS	rs1369312	DENND4A	RAB11A, DENND4A	Mean corpuscular hemoglobin	27863252	Astle WJ
No	ZH38T0016924	TSS	Verified GENCODE TSS	rs1061554	DENND4A	Intergenic, DENND4A	Educational attainment (MTAG); Cognitive performance (MTAG); Highest math class taken (MTAG)	30038396	Lee JJ
No	ZH38T0016924	TSS	Verified GENCODE TSS	rs1369312	DENND4A	Intergenic, DENND4A	Educational attainment (MTAG); Cognitive performance (MTAG); Highest math class taken (MTAG)	30038396	Lee JJ
No	ZH38T0016924	TSS	Verified GENCODE TSS	rs1061554	DENND4A	RAB11A, LOC105370866, DENND4A	Mean corpuscular volume; Mean corpuscular hemoglobin; Mean corpuscular hemoglobin concentration	29403010	Kanai M
No	ZH38T0016924	TSS	Verified GENCODE TSS	rs1369312	DENND4A	RAB11A, LOC105370866, DENND4A	Mean corpuscular volume; Mean corpuscular hemoglobin; Mean corpuscular hemoglobin concentration	29403010	Kanai M
No	ZH38T0016924	TSS	Verified GENCODE TSS	rs1061554	DENND4A	RAB11A, LOC105370866, DENND4A	Mean corpuscular volume; Mean corpuscular hemoglobin; Mean corpuscular hemoglobin concentration	29403010	Kanai M
No	ZH38T0016924	TSS	Verified GENCODE TSS	rs1369312	DENND4A	RAB11A, LOC105370866, DENND4A	Mean corpuscular volume; Mean corpuscular hemoglobin; Mean corpuscular hemoglobin concentration	29403010	Kanai M
No	ZH38T0016924	TSS	Verified GENCODE TSS	rs1061554	DENND4A	Intergenic, DENND4A	Educational attainment (MTAG); Cognitive performance (MTAG); Highest math class taken (MTAG)	30038396	Lee JJ
No	ZH38T0016924	TSS	Verified GENCODE TSS	rs1369312	DENND4A	Intergenic, DENND4A	Educational attainment (MTAG); Cognitive performance (MTAG); Highest math class taken (MTAG)	30038396	Lee JJ
Yes	ZH38T0016933	Proximal	Verified unannotated TSS	rs62013660	TIPIN	Intergenic, DIS3L	Educational attainment (MTAG)	30038396	Lee JJ
Yes	ZH38T0016933	Proximal	Verified unannotated TSS	rs62013660	RPL9P25	Intergenic, DIS3L	Educational attainment (MTAG)	30038396	Lee JJ
Yes	ZH38T0016975	Proximal	Verified unannotated TSS	rs16951723	AC107871.2	PIAS1, ITGA11, FEM1B, CLN6, CALML4	Major depressive disorder; Major depressive disorder	23377640	GENDEP Investigators
No	ZH38T0016977	Intron	Verified unannotated TSS	rs55700060	FEM1B	PIAS1, ITGA11, FEM1B, CLN6, CALML4	Major depressive disorder; Major depressive disorder	23377640	GENDEP Investigators
No	ZH38T0017105	TSS	Verified GENCODE TSS	rs923118	ISLR	ISLR, ISLR2	Blood protein levels	30072576	Emilsson V
Yes	ZH38T0017107	Proximal	Verified unannotated TSS	rs11639369	STRA6	ISLR, ISLR2	Blood protein levels	30072576	Emilsson V
Yes	ZH38T0017109	Proximal	Verified unannotated TSS	rs62003660	CCDC33	ISLR, ISLR2	Blood protein levels	30072576	Emilsson V
No	ZH38T0017141	TSS	Verified GENCODE TSS	rs6495131	COX5A	, Intergenic, FAM219B - COX5A	Educational attainment (MTAG); Highest math class taken (MTAG); Educational attainment (years of education)	30038396	Lee JJ
No	ZH38T0017181	Proximal	Verified unannotated TSS	rs10851885	NRG4	NRG4	Systolic blood pressure	30224653	Evangelou E
No	ZH38T0017226	TSS	Verified GENCODE TSS	rs12898295	DNAJA4	Intergenic, DNAJA4	Self-reported math ability	30038396	Lee JJ
Yes	ZH38T0017229	TSS	Verified GENCODE TSS	rs2037347	DNAJA4	Intergenic, WDR61	Cognitive performance (MTAG)	30038396	Lee JJ
No	ZH38T0017229	TSS	Verified GENCODE TSS	rs2037347	DNAJA4	Intergenic, DNAJA4	Self-reported math ability	30038396	Lee JJ
No	ZH38T0017261	TSS	Verified GENCODE TSS	rs1036939	CTSH	CTSH	Type 1 diabetes	18978792	Cooper JD
No	ZH38T0017261	TSS	Verified GENCODE TSS	rs1036939	CTSH	CTSH	Type 1 diabetes	19430480	Barrett JC
No	ZH38T0017261	TSS	Verified GENCODE TSS	rs2289702	CTSH	CTSH	Type 1 diabetes	25751624	Onengut-Gumuscu S
No	ZH38T0017261	TSS	Verified GENCODE TSS	rs2289702	CTSH	CTSH	Blood protein levels	29875488	Sun BB
No	ZH38T0017261	TSS	Verified GENCODE TSS	rs2289702	CTSH	CTSH	Blood protein levels	30072576	Emilsson V
No	ZH38T0017274	TSS	Verified GENCODE TSS	rs1138357	BCL2A1	BCL2A1 - LOC100420205, BCL2A1	Primary sclerosing cholangitis	27992413	Ji SG
No	ZH38T0017274	TSS	Verified GENCODE TSS	rs1138358	BCL2A1	BCL2A1 - LOC100420205, BCL2A1	Primary sclerosing cholangitis	27992413	Ji SG
No	ZH38T0017280	TSS	Verified GENCODE TSS	rs28759351	ZFAND6	ZFAND6, ZFAND6 - FAH	Type 2 diabetes	20581827	Voight BF
No	ZH38T0017293	TSS	Verified GENCODE TSS	rs11855057	MESD	MESDC2	Blood protein levels	30072576	Emilsson V
No	ZH38T0017293	TSS	Verified GENCODE TSS	rs11855085	MESD	MESDC2	Blood protein levels	30072576	Emilsson V
No	ZH38T0017293	TSS	Verified GENCODE TSS	rs11855135	MESD	MESDC2	Blood protein levels	30072576	Emilsson V
Yes	ZH38T0017330	TSS	Verified unannotated TSS	rs1124911	AP3B2	Intergenic, FSD2	Colorectal adenoma (advanced)	29228715	Hofer P
Yes	ZH38T0017330	TSS	Verified unannotated TSS	rs1124911	AC105339.1	Intergenic, FSD2	Colorectal adenoma (advanced)	29228715	Hofer P
Yes	ZH38T0017330	TSS	Verified unannotated TSS	rs1124911	ACTG1P17	Intergenic, FSD2	Colorectal adenoma (advanced)	29228715	Hofer P
No	ZH38T0017365	TSS	Verified GENCODE TSS	rs12904605	NMB	SEC11A, NMB	Blood protein levels	30072576	Emilsson V
No	ZH38T0017380	TSS	Verified GENCODE TSS	rs6497006	ADAMTS7P4	ADAMTS7P4 - LOC102724393, PDE8A, AKAP13	Central corneal thickness	20719862	Vitart V
No	ZH38T0017569	TSS	Verified GENCODE TSS	rs55816698	RGMA	RGMA	Blood protein levels	29875488	Sun BB
No	ZH38T0017627	TSS	Verified GENCODE TSS	rs8034564	IRAIN	Intergenic, FAM169B - IRAIN	Educational attainment (MTAG)	30038396	Lee JJ
No	ZH38T0017655	Proximal	Verified unannotated TSS	rs12902009	MEF2A	MEF2A	Systolic blood pressure	30224653	Evangelou E
No	ZH38T0017732	Proximal	Verified unannotated TSS	rs3837776	RAB11FIP3	RAB11FIP3	Platelet distribution width	27863252	Astle WJ
No	ZH38T0017740	Intron	Verified unannotated TSS	rs1981483	PIGQ	PIGQ	Disc degeneration (lumbar)	22993228	Williams FM
No	ZH38T0017749	TSS	Verified GENCODE TSS	rs4984682	WDR24	, Intergenic, WDR24	Educational attainment (MTAG); Educational attainment (years of education)	30038396	Lee JJ
No	ZH38T0017777	TSS	Verified GENCODE TSS	rs2003630	TPSD1	CACNA1H, TPSB2, PRSS29P, RP11-616M22.12, TPSAB1 - TPSD1, TPSG1, TPSD1, RP11-616M22.5, TPSAB1	Blood protein levels	28240269	Suhre K
No	ZH38T0017814	TSS	Verified GENCODE TSS	rs3817902	IGFALS	NUBP2, IGFALS	Insulin-like growth factors	21216879	Kaplan RC
No	ZH38T0017840	TSS	Verified GENCODE TSS	rs11544570	SLC9A3R2	NPW, NPW - SLC9A3R2	Blood protein levels	29875488	Sun BB
No	ZH38T0017974	TSS	Verified GENCODE TSS	rs758747	NLRC3	NR, NLRC3	Body mass index	26426971	Winkler TW
Yes	ZH38T0018106	TSS	Verified GENCODE TSS	rs181582	RMI2	DEXI, LOC105371082	Type 1 diabetes	25751624	Onengut-Gumuscu S
Yes	ZH38T0018106	TSS	Verified GENCODE TSS	rs181582	AC009121.3	DEXI, LOC105371082	Type 1 diabetes	25751624	Onengut-Gumuscu S
Yes	ZH38T0018311	TSS	Verified GENCODE TSS	rs79865622	ACSM2A	ACSM5	Blood metabolite levels	24816252	Shin SY
No	ZH38T0018311	TSS	Verified GENCODE TSS	rs79865622	ACSM2A	ACSM2A	Blood metabolite levels	24816252	Shin SY
No	ZH38T0018443	TSS	Verified GENCODE TSS	rs2189521	IL21R	IL21R, IL4R	Primary biliary cholangitis	28425483	Qiu F
Yes	ZH38T0018455	TSS	Verified GENCODE TSS	rs149271	CLN3	IL27 - NUPR1, IL27	Type 1 diabetes	19430480	Barrett JC
Yes	ZH38T0018455	TSS	Verified GENCODE TSS	rs149271	CLN3	NR, IL27	Ulcerative colitis; Crohn's disease; Inflammatory bowel disease	26192919	Liu JZ
Yes	ZH38T0018455	TSS	Verified GENCODE TSS	rs149271	CLN3	NUPR1, EIF3C, SULT1A1, SULT1A2, RABEP2, IL27	Inflammatory bowel disease	23128233	Jostins L
Yes	ZH38T0018455	TSS	Verified GENCODE TSS	rs149271	CLN3	IL27 - NUPR1, NPIPL1	Mosquito bite size	28199695	Jones AV
Yes	ZH38T0018455	TSS	Verified GENCODE TSS	rs149271	CLN3	IL27 - NUPR1, IL27	Type 1 diabetes	21829393	Plagnol V
Yes	ZH38T0018455	TSS	Verified GENCODE TSS	rs149271	CLN3	IL27 - NUPR1, NUPR1, IL27	Body mass index	28892062	Akiyama M
Yes	ZH38T0018455	TSS	Verified GENCODE TSS	rs149271	CLN3	, Intergenic, NUPR1 - CCDC101	Educational attainment (MTAG); Educational attainment (years of education)	30038396	Lee JJ
Yes	ZH38T0018455	TSS	Verified GENCODE TSS	rs149271	CLN3	IL27	Blood protein levels	29875488	Sun BB
Yes	ZH38T0018455	TSS	Verified GENCODE TSS	rs149271	CLN3	IL27	General cognitive ability	29844566	Davies G
No	ZH38T0018455	TSS	Verified GENCODE TSS	rs149271	CLN3	EIF3CL, CCDC101, SH2B1, EIF3C, IL27, CD19, RABEP2, NUPR1, SULT1A1, APOBR, ATXN2L, CLN3, NPIPB7, NPIPB6, NPIPB9, NPIPB8, SULT1A2, TUFM, ATP2A1	Crohn's disease; Inflammatory bowel disease	28067908	de Lange KM
Yes	ZH38T0018465	TSS	Verified GENCODE TSS	rs67340371	SGF29	CCDC101	General cognitive ability	29844566	Davies G
Yes	ZH38T0018467	Proximal	Verified unannotated TSS	rs7191618	SGF29	EIF3CL, CCDC101, SH2B1, EIF3C, IL27, CD19, RABEP2, NUPR1, SULT1A1, APOBR, ATXN2L, CLN3, NPIPB7, NPIPB6, NPIPB9, NPIPB8, SULT1A2, TUFM, ATP2A1	Crohn's disease; Inflammatory bowel disease	28067908	de Lange KM
Yes	ZH38T0018467	Proximal	Verified unannotated TSS	rs7191618	SGF29	IL27 - NUPR1, IL27	Type 1 diabetes	19430480	Barrett JC
Yes	ZH38T0018467	Proximal	Verified unannotated TSS	rs7191618	SGF29	NR, IL27	Ulcerative colitis; Crohn's disease; Inflammatory bowel disease	26192919	Liu JZ
Yes	ZH38T0018467	Proximal	Verified unannotated TSS	rs7191618	SGF29	NUPR1, EIF3C, SULT1A1, SULT1A2, RABEP2, IL27	Inflammatory bowel disease	23128233	Jostins L
Yes	ZH38T0018467	Proximal	Verified unannotated TSS	rs7191618	SGF29	IL27 - NUPR1, NPIPL1	Mosquito bite size	28199695	Jones AV
Yes	ZH38T0018467	Proximal	Verified unannotated TSS	rs7191618	SGF29	IL27 - NUPR1, IL27	Type 1 diabetes	21829393	Plagnol V
Yes	ZH38T0018467	Proximal	Verified unannotated TSS	rs7191618	SGF29	, Intergenic, NUPR1 - CCDC101	Educational attainment (MTAG); Educational attainment (years of education)	30038396	Lee JJ
Yes	ZH38T0018467	Proximal	Verified unannotated TSS	rs7191618	SGF29	IL27	General cognitive ability	29844566	Davies G
Yes	ZH38T0018468	TSS	Verified GENCODE TSS	rs762633	SULT1A2	IL27 - NUPR1, IL27	Type 1 diabetes	19430480	Barrett JC
Yes	ZH38T0018468	TSS	Verified GENCODE TSS	rs762633	SULT1A2	IL27 - NUPR1, IL27	Type 1 diabetes	21829393	Plagnol V
Yes	ZH38T0018468	TSS	Verified GENCODE TSS	rs762633	SULT1A2	, Intergenic, NUPR1 - CCDC101	Educational attainment (MTAG); Educational attainment (years of education)	30038396	Lee JJ
Yes	ZH38T0018476	TSS	Verified GENCODE TSS	rs7187776	TUFM	ATXN2L	Cognitive ability; Cognitive ability (MTAG)	29186694	Lam M
Yes	ZH38T0018476	TSS	Verified GENCODE TSS	rs7187776	TUFM	SH2B1 - ATP2A1, NR	Body mass index	26426971	Winkler TW
Yes	ZH38T0018476	TSS	Verified GENCODE TSS	rs7187776	TUFM	ATXN2L	Hand grip strength	29691431	Tikkanen E
Yes	ZH38T0018476	TSS	Verified GENCODE TSS	rs7187776	TUFM	SH2B1	Body mass index	19079261	Willer CJ
Yes	ZH38T0018476	TSS	Verified GENCODE TSS	rs7187776	TUFM	ATXN2L	Pediatric autoimmune diseases	26301688	Li YR
Yes	ZH38T0018476	TSS	Verified GENCODE TSS	rs7187776	TUFM	Intergenic, SH2B1	Self-reported math ability (MTAG); Self-reported math ability	30038396	Lee JJ
Yes	ZH38T0018476	TSS	Verified GENCODE TSS	rs7187776	TUFM	ATXN2L, Intergenic	Cognitive performance (MTAG)	30038396	Lee JJ
Yes	ZH38T0018476	TSS	Verified GENCODE TSS	rs7187776	TUFM	SH2B1 - ATP2A1, ATP2A1	Body mass index	26961502	Wood AR
No	ZH38T0018476	TSS	Verified GENCODE TSS	rs7187776	TUFM	TUFM, SH2B1	Hand grip strength	29691431	Tikkanen E
No	ZH38T0018476	TSS	Verified GENCODE TSS	rs7187776	TUFM	ATXN2L, SH2B1 - ATP2A1, SULT1A2, AC138894.2, SH2B1, APOB48R, TUFM	Body mass index	20935630	Speliotes EK
No	ZH38T0018476	TSS	Verified GENCODE TSS	rs7187776	TUFM	NR, TUFM, SH2B1	Inflammatory bowel disease	26192919	Liu JZ
No	ZH38T0018476	TSS	Verified GENCODE TSS	rs7187776	TUFM	TUFM, SH2B1	General cognitive ability	29844566	Davies G
Yes	ZH38T0018479	TSS	Verified GENCODE TSS	rs11864750	SH2B1	ATXN2L	Cognitive ability; Cognitive ability (MTAG)	29186694	Lam M
Yes	ZH38T0018479	TSS	Verified GENCODE TSS	rs7198606	SH2B1	ATXN2L	Cognitive ability; Cognitive ability (MTAG)	29186694	Lam M
Yes	ZH38T0018479	TSS	Verified GENCODE TSS	rs11864750	SH2B1	ATXN2L, Intergenic	Cognitive performance (MTAG)	30038396	Lee JJ
Yes	ZH38T0018479	TSS	Verified GENCODE TSS	rs7198606	SH2B1	ATXN2L, Intergenic	Cognitive performance (MTAG)	30038396	Lee JJ
No	ZH38T0018479	TSS	Verified GENCODE TSS	rs11864750	SH2B1	SH2B1 - ATP2A1, NR	Body mass index	26426971	Winkler TW
No	ZH38T0018479	TSS	Verified GENCODE TSS	rs7198606	SH2B1	SH2B1 - ATP2A1, NR	Body mass index	26426971	Winkler TW
No	ZH38T0018479	TSS	Verified GENCODE TSS	rs11864750	SH2B1	TUFM, SH2B1	Hand grip strength	29691431	Tikkanen E
No	ZH38T0018479	TSS	Verified GENCODE TSS	rs7198606	SH2B1	TUFM, SH2B1	Hand grip strength	29691431	Tikkanen E
No	ZH38T0018479	TSS	Verified GENCODE TSS	rs11864750	SH2B1	ATXN2L, SH2B1 - ATP2A1, SULT1A2, AC138894.2, SH2B1, APOB48R, TUFM	Body mass index	20935630	Speliotes EK
No	ZH38T0018479	TSS	Verified GENCODE TSS	rs7198606	SH2B1	ATXN2L, SH2B1 - ATP2A1, SULT1A2, AC138894.2, SH2B1, APOB48R, TUFM	Body mass index	20935630	Speliotes EK
No	ZH38T0018479	TSS	Verified GENCODE TSS	rs11864750	SH2B1	SH2B1	Body mass index	19079261	Willer CJ
No	ZH38T0018479	TSS	Verified GENCODE TSS	rs7198606	SH2B1	SH2B1	Body mass index	19079261	Willer CJ
No	ZH38T0018479	TSS	Verified GENCODE TSS	rs11864750	SH2B1	NR, TUFM, SH2B1	Inflammatory bowel disease	26192919	Liu JZ
No	ZH38T0018479	TSS	Verified GENCODE TSS	rs7198606	SH2B1	NR, TUFM, SH2B1	Inflammatory bowel disease	26192919	Liu JZ
No	ZH38T0018479	TSS	Verified GENCODE TSS	rs11864750	SH2B1	SH2B1 - ATP2A1, ATP2A1, ATP2A1-AS1	Body mass index	28892062	Akiyama M
No	ZH38T0018479	TSS	Verified GENCODE TSS	rs7198606	SH2B1	SH2B1 - ATP2A1, ATP2A1, ATP2A1-AS1	Body mass index	28892062	Akiyama M
No	ZH38T0018479	TSS	Verified GENCODE TSS	rs11864750	SH2B1	TUFM, SH2B1	Mean corpuscular volume	27863252	Astle WJ
No	ZH38T0018479	TSS	Verified GENCODE TSS	rs7198606	SH2B1	TUFM, SH2B1	Mean corpuscular volume	27863252	Astle WJ
No	ZH38T0018479	TSS	Verified GENCODE TSS	rs11864750	SH2B1	Intergenic, SH2B1	Self-reported math ability (MTAG); Self-reported math ability	30038396	Lee JJ
No	ZH38T0018479	TSS	Verified GENCODE TSS	rs7198606	SH2B1	Intergenic, SH2B1	Self-reported math ability (MTAG); Self-reported math ability	30038396	Lee JJ
No	ZH38T0018479	TSS	Verified GENCODE TSS	rs11864750	SH2B1	TUFM, SH2B1	General cognitive ability	29844566	Davies G
No	ZH38T0018479	TSS	Verified GENCODE TSS	rs7198606	SH2B1	TUFM, SH2B1	General cognitive ability	29844566	Davies G
No	ZH38T0018479	TSS	Verified GENCODE TSS	rs11864750	SH2B1	SH2B1 - ATP2A1, ATP2A1	Body mass index	26961502	Wood AR
No	ZH38T0018479	TSS	Verified GENCODE TSS	rs7198606	SH2B1	SH2B1 - ATP2A1, ATP2A1	Body mass index	26961502	Wood AR
Yes	ZH38T0018551	Proximal	Verified unannotated TSS	rs12716973	AC120114.1	NR, LOC107984836 - TMEM219	Body mass index	26426971	Winkler TW
Yes	ZH38T0018551	Proximal	Verified unannotated TSS	rs12716973	AC120114.1	KCTD13, LOC107984836	Hand grip strength	29691431	Tikkanen E
Yes	ZH38T0018563	Proximal	Verified unannotated TSS	rs4788213	DOC2A	PPP4C	Mean corpuscular volume	29403010	Kanai M
Yes	ZH38T0018566	Intergenic	Verified unannotated TSS	rs4788215	FAM57B	PPP4C	Mean corpuscular volume	29403010	Kanai M
Yes	ZH38T0018589	TSS	Verified GENCODE TSS	rs73530179	AC012645.1	PPP4C	Mean corpuscular volume	29403010	Kanai M
No	ZH38T0018682	Proximal	Verified unannotated TSS	rs35675346	FBXL19	FBXL19	Diastolic blood pressure	28135244	Warren HR
Yes	ZH38T0018695	TSS	Verified GENCODE TSS	rs12445650	STX4	VKORC1, VKORC1 - BCKDK	Warfarin maintenance dose	20833655	Cha PC
Yes	ZH38T0018695	TSS	Verified GENCODE TSS	rs12445650	STX4	Intergenic, PRSS53	Self-reported math ability	30038396	Lee JJ
Yes	ZH38T0018700	TSS	Verified GENCODE TSS	rs2303222	ZNF668	KAT8, NR	Body mass index	26426971	Winkler TW
Yes	ZH38T0018700	TSS	Verified GENCODE TSS	rs2303222	ZNF668	VKORC1, VKORC1 - BCKDK	Warfarin maintenance dose	20833655	Cha PC
Yes	ZH38T0018700	TSS	Verified GENCODE TSS	rs2303222	ZNF668	VKORC1, STX4	Warfarin maintenance dose	18535201	Cooper GM
Yes	ZH38T0018700	TSS	Verified GENCODE TSS	rs2303222	ZNF668	VKORC1, VKORC1 - BCKDK	Warfarin maintenance dose	19300499	Takeuchi F
No	ZH38T0018814	Proximal	Verified unannotated TSS	rs12930156	TOX3	TOX3, LOC643174, CASC16	Breast cancer (male)	23001122	Orr N
Yes	ZH38T0018979	TSS	Verified GENCODE TSS	rs1646276	AC106793.1	GOT2, LOC107984867	Blood metabolite ratios	24816252	Shin SY
No	ZH38T0019030	Proximal	Verified unannotated TSS	rs45474499	PDP2	PDP2	Diastolic blood pressure	30224653	Evangelou E
No	ZH38T0019130	TSS	Verified GENCODE TSS	rs3785100	SLC12A4	SLC12A4, LCAT	HDL cholesterol levels; HDL cholesterol levels	28334899	Spracklen CN
No	ZH38T0019130	TSS	Verified GENCODE TSS	rs3785100	SLC12A4	SLC12A4, LCAT	HDL cholesterol levels	28334899	Spracklen CN
Yes	ZH38T0019147	TSS	Verified GENCODE TSS	rs3743735	NFATC3	SLC12A4, LCAT	HDL cholesterol levels	28334899	Spracklen CN
No	ZH38T0019163	TSS	Verified GENCODE TSS	rs1170443	ZFP90	CDH3, ZFP90	Ulcerative colitis	28067908	de Lange KM
No	ZH38T0019163	TSS	Verified GENCODE TSS	rs1170444	ZFP90	CDH3, ZFP90	Ulcerative colitis	28067908	de Lange KM
No	ZH38T0019245	TSS	Verified GENCODE TSS	rs5472	HP	HPR, TXNL4B	LDL cholesterol levels; LDL cholesterol levels; Total cholesterol levels; Total cholesterol levels	28334899	Spracklen CN
No	ZH38T0019245	TSS	Verified GENCODE TSS	rs5472	HP	HPR, TXNL4B	LDL cholesterol levels; LDL cholesterol levels; Total cholesterol levels; Total cholesterol levels	28334899	Spracklen CN
No	ZH38T0019249	Intron	Verified unannotated TSS	rs2000999	HPR	DHX38, HPR, HP, TXNL4B, PMFBP1	Blood protein levels; Blood protein levels; Blood protein levels	28240269	Suhre K
No	ZH38T0019249	Intron	Verified unannotated TSS	rs2000999	HPR	HPR, TXNL4B	LDL cholesterol levels; LDL cholesterol levels; Total cholesterol levels; Total cholesterol levels	28334899	Spracklen CN
No	ZH38T0019249	Intron	Verified unannotated TSS	rs2000999	HPR	HPR, TXNL4B	LDL cholesterol levels; LDL cholesterol levels; Total cholesterol levels; Total cholesterol levels	28334899	Spracklen CN
No	ZH38T0019249	Intron	Verified unannotated TSS	rs2000999	HPR	HPR, NR, TXNL4B	Blood protein levels	29875488	Sun BB
No	ZH38T0019252	Proximal	Verified unannotated TSS	rs7194397	TXNL4B	HPR, TXNL4B	LDL cholesterol levels; LDL cholesterol levels; Total cholesterol levels; Total cholesterol levels	28334899	Spracklen CN
No	ZH38T0019252	Proximal	Verified unannotated TSS	rs7194397	TXNL4B	HPR, TXNL4B	LDL cholesterol levels; LDL cholesterol levels; Total cholesterol levels; Total cholesterol levels	28334899	Spracklen CN
No	ZH38T0019307	TSS	Verified GENCODE TSS	rs146784495	CTRB2	NR, CTRB2 - CTRB1	Blood protein levels	29875488	Sun BB
Yes	ZH38T0019311	Proximal	Verified unannotated TSS	rs117757420	BCAR1	NR, CTRB2 - CTRB1	Blood protein levels	29875488	Sun BB
Yes	ZH38T0019312	Intron	Verified unannotated TSS	rs146202479	BCAR1	NR, CTRB2 - CTRB1	Blood protein levels	29875488	Sun BB
Yes	ZH38T0019419	TSS	Verified GENCODE TSS	rs16962855	MBTPS1	Intergenic, HSDL1	Educational attainment (MTAG); Highest math class taken (MTAG)	30038396	Lee JJ
No	ZH38T0019543	TSS	Verified GENCODE TSS	rs117565673	CBFA2T3	CBFA2T3	Mean corpuscular hemoglobin	27863252	Astle WJ
Yes	ZH38T0019582	TSS	Verified GENCODE TSS	rs1800282	FANCA	Intergenic, SPIRE2	Self-reported math ability	30038396	Lee JJ
No	ZH38T0019686	TSS	Verified GENCODE TSS	rs58697961	SERPINF1	SERPINF1	Blood protein levels; Blood protein levels	29875488	Sun BB
No	ZH38T0019686	TSS	Verified GENCODE TSS	rs58697961	SERPINF1	SERPINF1	Blood protein levels	30072576	Emilsson V
Yes	ZH38T0019757	TSS	Verified GENCODE TSS	rs114582898	ZZEF1	ANKFY1, CYB5D2	Blood protein levels	30072576	Emilsson V
Yes	ZH38T0019759	Proximal	Verified unannotated TSS	rs78613183	ZZEF1	ANKFY1, CYB5D2	Blood protein levels	30072576	Emilsson V
No	ZH38T0019952	TSS	Verified GENCODE TSS	rs5417	SLC2A4	SLC2A4, TP53	Diastolic blood pressure	28135244	Warren HR
No	ZH38T0019952	TSS	Verified GENCODE TSS	rs5418	SLC2A4	SLC2A4, TP53	Diastolic blood pressure	28135244	Warren HR
No	ZH38T0020048	Intron	Verified unannotated TSS	rs7503751	CHD3	intergenic, CHD3	Systolic blood pressure; Systolic blood pressure	28739976	Wain LV
Yes	ZH38T0020080	TSS	Verified GENCODE TSS	rs3027172	AC129492.1	NR, LOC105376799	General cognitive ability	29844566	Davies G
Yes	ZH38T0020087	TSS	Verified unannotated TSS	rs11650713	VAMP2	LOC105371520, TMEM107	Diastolic blood pressure	30224653	Evangelou E
Yes	ZH38T0020087	TSS	Verified unannotated TSS	rs11650713	AC129492.4	LOC105371520, TMEM107	Diastolic blood pressure	30224653	Evangelou E
No	ZH38T0020330	TSS	Verified GENCODE TSS	rs11548434	PRPSAP2	NR, PRPSAP2	Motor composite score	30120420	Sun R
Yes	ZH38T0020347	TSS	Verified GENCODE TSS	rs2233072	MAPK7	EPN2-AS1, EPN2	Diastolic blood pressure	30224653	Evangelou E
No	ZH38T0020368	TSS	Verified GENCODE TSS	rs8067545	SPECC1	SPECC1	Mean corpuscular hemoglobin	27863252	Astle WJ
No	ZH38T0020368	TSS	Verified GENCODE TSS	rs8067545	SPECC1	SPECC1	Mean corpuscular volume	27863252	Astle WJ
No	ZH38T0020368	TSS	Verified GENCODE TSS	rs8067545	SPECC1	Intergenic, SPECC1	Educational attainment (MTAG); Highest math class taken (MTAG)	30038396	Lee JJ
Yes	ZH38T0020420	Proximal	Verified unannotated TSS	rs11867203	AC069061.2	LOC105371703 - LOC105371704, WSB1, FAM27L	Chronic myeloid leukemia	21540461	Kim DH
Yes	ZH38T0020420	Proximal	Verified unannotated TSS	rs11867203	TUFMP1	LOC105371703 - LOC105371704, WSB1, FAM27L	Chronic myeloid leukemia	21540461	Kim DH
Yes	ZH38T0020420	Proximal	Verified unannotated TSS	rs11867203	GTF2IP6	LOC105371703 - LOC105371704, WSB1, FAM27L	Chronic myeloid leukemia	21540461	Kim DH
No	ZH38T0020434	TSS	Verified GENCODE TSS	rs3751093	LGALS9	LGALS9	Blood protein levels	30072576	Emilsson V
Yes	ZH38T0020499	TSS	Verified unannotated TSS	rs113231461	FAM222B	MIR4732, MIR4732 - FLOT2, FLOT2	Mean corpuscular hemoglobin	29403010	Kanai M
No	ZH38T0020499	TSS	Verified unannotated TSS	rs113231461	FAM222B	FAM222B	Mean corpuscular hemoglobin; Mean corpuscular volume	27863252	Astle WJ
No	ZH38T0020499	TSS	Verified unannotated TSS	rs113231461	FAM222B	FAM222B	Mean corpuscular hemoglobin; Mean corpuscular volume	27863252	Astle WJ
No	ZH38T0020529	Intron	Verified unannotated TSS	rs9906043	MYO18A	TIAF1, MYO18A, CRYBA1, TWF1P1	Night sleep phenotypes	27126917	Spada J
Yes	ZH38T0020578	Proximal	Verified unannotated TSS	rs11650924	SUZ12P1	ATAD5	Body mass index	28892062	Akiyama M
Yes	ZH38T0020578	Proximal	Verified unannotated TSS	rs11650928	SUZ12P1	ATAD5	Body mass index	28892062	Akiyama M
No	ZH38T0020578	Proximal	Verified unannotated TSS	rs11650924	SUZ12P1	SUZ12P1 - CRLF3, SUZ12P1, CRLF3	Mean corpuscular hemoglobin	29403010	Kanai M
No	ZH38T0020578	Proximal	Verified unannotated TSS	rs11650928	SUZ12P1	SUZ12P1 - CRLF3, SUZ12P1, CRLF3	Mean corpuscular hemoglobin	29403010	Kanai M
Yes	ZH38T0020579	TSS	Verified GENCODE TSS	rs3752019	CRLF3	ATAD5	Body mass index	28892062	Akiyama M
No	ZH38T0020579	TSS	Verified GENCODE TSS	rs3752019	CRLF3	SUZ12P1 - CRLF3, SUZ12P1, CRLF3	Mean corpuscular hemoglobin	29403010	Kanai M
Yes	ZH38T0020582	Proximal	Verified unannotated TSS	rs2269915	ADAP2	ATAD5	Body mass index	28892062	Akiyama M
Yes	ZH38T0020582	Proximal	Verified unannotated TSS	rs2269915	ADAP2	SUZ12P1 - CRLF3, SUZ12P1, CRLF3	Mean corpuscular hemoglobin	29403010	Kanai M
Yes	ZH38T0020687	TSS	Verified GENCODE TSS	rs113937434	CCL14	NR, LOC107985068, CCL23	Blood protein levels	29875488	Sun BB
Yes	ZH38T0020687	TSS	Verified GENCODE TSS	rs75238886	CCL14	NR, LOC107985068, CCL23	Blood protein levels	29875488	Sun BB
No	ZH38T0020688	TSS	Verified GENCODE TSS	rs2293788	CCL15	CCL15-CCL14, CCL14, CTB-186H2.3, CCL16, CCL15	Blood protein levels	28240269	Suhre K
No	ZH38T0020688	TSS	Verified GENCODE TSS	rs2293788	CCL15	CCL15-CCL14, NR, CCL14	Blood protein levels	29875488	Sun BB
No	ZH38T0020689	TSS	Verified GENCODE TSS	rs2072667	CCL23	NR, LOC107985068, CCL23	Blood protein levels	29875488	Sun BB
Yes	ZH38T0020690	TSS	Verified GENCODE TSS	rs2015086	CCL18	NR, LOC105371746	Blood protein levels	28240269	Suhre K
Yes	ZH38T0020690	TSS	Verified GENCODE TSS	rs2015086	CCL18	Intergenic, LOC107985068, LOC105371746	Blood protein levels; Blood protein levels	28240269	Suhre K
No	ZH38T0020690	TSS	Verified GENCODE TSS	rs2015086	CCL18	LOC105371746 - CCL18, CCL3L1	Blood protein levels	29875488	Sun BB
No	ZH38T0020690	TSS	Verified GENCODE TSS	rs2015086	CCL18	CCL3, CCL3L1, LOC105371746 - CCL18	Blood protein levels; Blood protein levels	30072576	Emilsson V
No	ZH38T0020690	TSS	Verified GENCODE TSS	rs2015086	CCL18	CCL18	Blood protein levels	30072576	Emilsson V
Yes	ZH38T0020699	TSS	Verified GENCODE TSS	rs4796224	ZNHIT3	Intergenic, MYO19	Self-reported math ability; Self-reported math ability (MTAG)	30038396	Lee JJ
Yes	ZH38T0020699	TSS	Verified GENCODE TSS	rs4796224	ZNHIT3	DHRS11, NR	General cognitive ability	29844566	Davies G
Yes	ZH38T0020705	Proximal	Verified unannotated TSS	rs3736165	MYO19	GGNBP2	Body mass index	28892062	Akiyama M
Yes	ZH38T0020705	Proximal	Verified unannotated TSS	rs3736165	MYO19	, Intergenic, GGNBP2	Educational attainment (MTAG); Cognitive performance (MTAG); Educational attainment (years of education)	30038396	Lee JJ
Yes	ZH38T0020705	Proximal	Verified unannotated TSS	rs3736165	MYO19	, Intergenic, GGNBP2	Educational attainment (MTAG); Cognitive performance (MTAG); Educational attainment (years of education)	30038396	Lee JJ
No	ZH38T0020705	Proximal	Verified unannotated TSS	rs3736165	MYO19	ZNHIT3, CCL3, TBC1D3B, TBC1D3C, LHX1, CCL4, TBC1D3G, TBC1D3H, CCL4L1, CCL4L2, MIR2909, MRM1, AATF, GGNBP2, MYO19, PIGW, DHRS11, CCL3L3, CCL3L1	Body mass index	26426971	Winkler TW
Yes	ZH38T0020706	TSS	Verified GENCODE TSS	rs3736166	GGNBP2	Intergenic, MYO19	Self-reported math ability; Self-reported math ability (MTAG)	30038396	Lee JJ
Yes	ZH38T0020706	TSS	Verified GENCODE TSS	rs3736166	GGNBP2	DHRS11, NR	General cognitive ability	29844566	Davies G
No	ZH38T0020706	TSS	Verified GENCODE TSS	rs3736167	GGNBP2	ZNHIT3, CCL3, TBC1D3B, TBC1D3C, LHX1, CCL4, TBC1D3G, TBC1D3H, CCL4L1, CCL4L2, MIR2909, MRM1, AATF, GGNBP2, MYO19, PIGW, DHRS11, CCL3L3, CCL3L1	Body mass index	26426971	Winkler TW
No	ZH38T0020706	TSS	Verified GENCODE TSS	rs3736167	GGNBP2	GGNBP2	Body mass index	28892062	Akiyama M
No	ZH38T0020706	TSS	Verified GENCODE TSS	rs3736167	GGNBP2	, Intergenic, GGNBP2	Educational attainment (MTAG); Cognitive performance (MTAG); Educational attainment (years of education)	30038396	Lee JJ
No	ZH38T0020706	TSS	Verified GENCODE TSS	rs3736167	GGNBP2	, Intergenic, GGNBP2	Educational attainment (MTAG); Cognitive performance (MTAG); Educational attainment (years of education)	30038396	Lee JJ
Yes	ZH38T0020814	Proximal	Verified unannotated TSS	rs931992	TCAP	NEUROD2, NEUROD2 - PPP1R1B	Mean corpuscular hemoglobin; Red blood cell count	27863252	Astle WJ
Yes	ZH38T0020814	Proximal	Verified unannotated TSS	rs931992	TCAP	STARD3	HDL cholesterol levels	28334899	Spracklen CN
Yes	ZH38T0020814	Proximal	Verified unannotated TSS	rs931992	TCAP	, Intergenic, NEUROD2 - PPP1R1B	Educational attainment (MTAG); Educational attainment (years of education)	30038396	Lee JJ
Yes	ZH38T0020828	TSS	Verified GENCODE TSS	rs1453559	IKZF3	GSDMB, ORMDL3	Type 1 diabetes	19430480	Barrett JC
Yes	ZH38T0020828	TSS	Verified GENCODE TSS	rs1453559	IKZF3	GSDMB	Asthma (childhood onset)	24241537	Bonnelykke K
Yes	ZH38T0020828	TSS	Verified GENCODE TSS	rs1453559	IKZF3	ZPBP2 - GSDMB, ORMDL3	Type 1 diabetes	21829393	Plagnol V
Yes	ZH38T0020828	TSS	Verified GENCODE TSS	rs1453559	IKZF3	Intergenic, GSDMB	Educational attainment (MTAG)	30038396	Lee JJ
No	ZH38T0020828	TSS	Verified GENCODE TSS	rs1453559	IKZF3	IKZF3	Primary biliary cholangitis	28062665	Kawashima M
No	ZH38T0020828	TSS	Verified GENCODE TSS	rs1453559	IKZF3	ZPBP2 - GSDMB, GSDMB, ORMDL3, IKZF3, ZPBP2	Primary biliary cirrhosis	22961000	Liu JZ
No	ZH38T0020828	TSS	Verified GENCODE TSS	rs1453559	IKZF3	ZPBP2 - GSDMB, GSDMB, ORMDL3, IKZF3	Rheumatoid arthritis; Rheumatoid arthritis (ACPA-positive)	23143596	Eyre S
No	ZH38T0020828	TSS	Verified GENCODE TSS	rs1453559	IKZF3	ZPBP2 - GSDMB, GSDMB, ORMDL3, IKZF3	Rheumatoid arthritis (ACPA-positive)	23143596	Eyre S
No	ZH38T0020828	TSS	Verified GENCODE TSS	rs1453559	IKZF3	GSDMB, ORMDL3, IKZF3, ZPBP2	Primary biliary cholangitis	20639880	Liu X
No	ZH38T0020828	TSS	Verified GENCODE TSS	rs1453559	IKZF3	IKZF3	Primary biliary cholangitis	26394269	Cordell HJ
No	ZH38T0020828	TSS	Verified GENCODE TSS	rs1453559	IKZF3	ZPBP2 - GSDMB, IKZF3	Pediatric autoimmune diseases	26301688	Li YR
No	ZH38T0020828	TSS	Verified GENCODE TSS	rs1453559	IKZF3	IKZF3 - ZPBP2, NR	Inflammatory bowel disease	26192919	Liu JZ
No	ZH38T0020828	TSS	Verified GENCODE TSS	rs1453559	IKZF3	GSDMB, ORMDL3, IKZF3, ZPBP2	Primary biliary cholangitis	23000144	Nakamura M
No	ZH38T0020828	TSS	Verified GENCODE TSS	rs1453559	IKZF3	ZPBP2 - GSDMB, GSDMB, ORMDL3, IKZF3	Type 1 diabetes	25751624	Onengut-Gumuscu S
Yes	ZH38T0020829	TSS	Verified GENCODE TSS	rs11557466	ZPBP2	IKZF3	Primary biliary cholangitis	28062665	Kawashima M
Yes	ZH38T0020829	TSS	Verified GENCODE TSS	rs11557466	ZPBP2	GSDMB, ORMDL3	Type 1 diabetes	19430480	Barrett JC
Yes	ZH38T0020829	TSS	Verified GENCODE TSS	rs11557466	ZPBP2	IKZF3	Primary biliary cholangitis	19458352	Hirschfield GM
Yes	ZH38T0020829	TSS	Verified GENCODE TSS	rs11557466	ZPBP2	GRB7 - IKZF3, NR	Ulcerative colitis; Crohn's disease; Inflammatory bowel disease	26192919	Liu JZ
Yes	ZH38T0020829	TSS	Verified GENCODE TSS	rs11557466	ZPBP2	GSDMB	Asthma (childhood onset)	24241537	Bonnelykke K
No	ZH38T0020829	TSS	Verified GENCODE TSS	rs11557466	ZPBP2	ORMDL3, GSDMA, GSDMB, GRB7, GRB7 - IKZF3, LRRC3C, IKZF3, ZPBP2	Crohn's disease; Ulcerative colitis; Inflammatory bowel disease	28067908	de Lange KM
No	ZH38T0020829	TSS	Verified GENCODE TSS	rs11557466	ZPBP2	ORMDL3, GSDMA, GSDMB, GRB7, GRB7 - IKZF3, LRRC3C, IKZF3, ZPBP2	Crohn's disease; Ulcerative colitis; Inflammatory bowel disease	28067908	de Lange KM
No	ZH38T0020829	TSS	Verified GENCODE TSS	rs11557466	ZPBP2	ZPBP2 - GSDMB, GSDMB, ORMDL3, IKZF3, ZPBP2	Primary biliary cirrhosis	22961000	Liu JZ
No	ZH38T0020829	TSS	Verified GENCODE TSS	rs11557466	ZPBP2	ZPBP2 - GSDMB, GSDMB, ORMDL3, IKZF3	Rheumatoid arthritis; Rheumatoid arthritis (ACPA-positive)	23143596	Eyre S
No	ZH38T0020829	TSS	Verified GENCODE TSS	rs11557466	ZPBP2	ZPBP2 - GSDMB, GSDMB, ORMDL3, IKZF3	Rheumatoid arthritis (ACPA-positive)	23143596	Eyre S
No	ZH38T0020829	TSS	Verified GENCODE TSS	rs11557466	ZPBP2	ZPBP2 - GSDMB, IKZF3	Pediatric autoimmune diseases	26301688	Li YR
No	ZH38T0020829	TSS	Verified GENCODE TSS	rs11557466	ZPBP2	IKZF3 - ZPBP2, NR	Inflammatory bowel disease	26192919	Liu JZ
No	ZH38T0020829	TSS	Verified GENCODE TSS	rs11557466	ZPBP2	GSDMB, ORMDL3, IKZF3, ZPBP2	Primary biliary cholangitis	23000144	Nakamura M
No	ZH38T0020829	TSS	Verified GENCODE TSS	rs11557466	ZPBP2	ORMDL3, GSDMA, GSDMB, GRB7 - IKZF3, IKZF3, ZPBP2	Inflammatory bowel disease	23128233	Jostins L
No	ZH38T0020829	TSS	Verified GENCODE TSS	rs11557466	ZPBP2	ZPBP2 - GSDMB, ORMDL3	Type 1 diabetes	21829393	Plagnol V
No	ZH38T0020829	TSS	Verified GENCODE TSS	rs11557466	ZPBP2	ZPBP2 - GSDMB, GSDMB, ORMDL3, IKZF3	Type 1 diabetes	25751624	Onengut-Gumuscu S
No	ZH38T0021018	TSS	Verified GENCODE TSS	rs4432296	CNP	CNP	Blood protein levels	30072576	Emilsson V
No	ZH38T0021139	TSS	Verified GENCODE TSS	rs2070592	PYY	PYY, PPY - PYY	Blood protein levels	30072576	Emilsson V
No	ZH38T0021152	TSS	Verified GENCODE TSS	rs74635090	C17orf53	C17orf53 - ASB16, G6PC3	Glycated hemoglobin levels	24244560	Chen P
Yes	ZH38T0021226	TSS	Verified GENCODE TSS	rs62064651	ARHGAP27	PLEKHM1, NR	Serous invasive ovarian cancer; High-grade serous ovarian cancer; Invasive epithelial ovarian cancer; Ovarian cancer in BRCA1 mutation carriers; Epithelial ovarian cancer	28346442	Phelan CM
Yes	ZH38T0021228	Intron	Verified unannotated TSS	rs34018943	ARHGAP27	PLEKHM1, NR	Serous invasive ovarian cancer; High-grade serous ovarian cancer; Invasive epithelial ovarian cancer; Ovarian cancer in BRCA1 mutation carriers; Epithelial ovarian cancer	28346442	Phelan CM
Yes	ZH38T0021229	Intron	Verified unannotated TSS	rs62064652	ARHGAP27	PLEKHM1, NR	Serous invasive ovarian cancer; High-grade serous ovarian cancer; Invasive epithelial ovarian cancer; Ovarian cancer in BRCA1 mutation carriers; Epithelial ovarian cancer	28346442	Phelan CM
Yes	ZH38T0021230	TSS	Verified GENCODE TSS	rs55642947	ARHGAP27	PLEKHM1, NR	Serous invasive ovarian cancer; High-grade serous ovarian cancer; Invasive epithelial ovarian cancer; Ovarian cancer in BRCA1 mutation carriers; Epithelial ovarian cancer	28346442	Phelan CM
Yes	ZH38T0021239	TSS	Verified GENCODE TSS	rs144722105	MAPT	Intergenic, MGC57346-CRHR1, CRHR1	Educational attainment (MTAG); Highest math class taken (MTAG)	30038396	Lee JJ
Yes	ZH38T0021239	TSS	Verified GENCODE TSS	rs62056779	MAPT	Intergenic, MGC57346-CRHR1, CRHR1	Educational attainment (MTAG); Highest math class taken (MTAG)	30038396	Lee JJ
No	ZH38T0021239	TSS	Verified GENCODE TSS	rs144722105	MAPT	MAPT	Cognitive ability; Cognitive ability (MTAG)	29186694	Lam M
No	ZH38T0021239	TSS	Verified GENCODE TSS	rs62056779	MAPT	MAPT	Cognitive ability; Cognitive ability (MTAG)	29186694	Lam M
No	ZH38T0021239	TSS	Verified GENCODE TSS	rs144722105	MAPT	LOC105371800, MAPT, CRHR1	Primary biliary cirrhosis	22961000	Liu JZ
No	ZH38T0021239	TSS	Verified GENCODE TSS	rs62056779	MAPT	LOC105371800, MAPT, CRHR1	Primary biliary cirrhosis	22961000	Liu JZ
No	ZH38T0021239	TSS	Verified GENCODE TSS	rs144722105	MAPT	MAPT-AS1, SPPL2C	Hand grip strength	29691431	Tikkanen E
No	ZH38T0021239	TSS	Verified GENCODE TSS	rs62056779	MAPT	MAPT-AS1, SPPL2C	Hand grip strength	29691431	Tikkanen E
No	ZH38T0021239	TSS	Verified GENCODE TSS	rs144722105	MAPT	KANSL1, STH, MAPT-AS1, MAPT, SPPL2C, CRHR1	Idiopathic pulmonary fibrosis	24429156	Noth I
No	ZH38T0021239	TSS	Verified GENCODE TSS	rs62056779	MAPT	KANSL1, STH, MAPT-AS1, MAPT, SPPL2C, CRHR1	Idiopathic pulmonary fibrosis	24429156	Noth I
Yes	ZH38T0021242	Intron	Verified unannotated TSS	rs77009866	KANSL1	MAPT	Progressive supranuclear palsy	21685912	Hoglinger GU
Yes	ZH38T0021242	Intron	Verified unannotated TSS	rs77009866	KANSL1	MAPT	Interstitial lung disease	23583980	Fingerlin TE
Yes	ZH38T0021242	Intron	Verified unannotated TSS	rs77009866	KANSL1	Intergenic, MAPT	Type 1 diabetes	25751624	Onengut-Gumuscu S
Yes	ZH38T0021242	Intron	Verified unannotated TSS	rs77009866	KANSL1	MAPT	General cognitive ability	29844566	Davies G
No	ZH38T0021242	Intron	Verified unannotated TSS	rs77009866	KANSL1	KANSL1	Mean corpuscular hemoglobin; Mean corpuscular volume	27863252	Astle WJ
No	ZH38T0021242	Intron	Verified unannotated TSS	rs77009866	KANSL1	KANSL1	Lung function (FEV1); Lung function (FVC)	28166213	Wain LV
No	ZH38T0021242	Intron	Verified unannotated TSS	rs77009866	KANSL1	KANSL1	Lung function (FEV1); Lung function (FVC)	28166213	Wain LV
No	ZH38T0021242	Intron	Verified unannotated TSS	rs77009866	KANSL1	KANSL1	Mean corpuscular hemoglobin; Mean corpuscular volume	27863252	Astle WJ
Yes	ZH38T0021318	TSS	Verified GENCODE TSS	rs4794453	SNX11	SKAP1	Body mass index	28892062	Akiyama M
Yes	ZH38T0021487	TSS	Verified GENCODE TSS	rs9890200	SPATA20	CACNA1G-AS1, NR	Type 2 diabetes	28566273	Scott RA
No	ZH38T0021487	TSS	Verified GENCODE TSS	rs9890200	SPATA20	SPATA20	Blood protein levels	29875488	Sun BB
No	ZH38T0021487	TSS	Verified GENCODE TSS	rs9890200	SPATA20	CACNA1G-AS1, SPATA20	Blood protein levels	30072576	Emilsson V
Yes	ZH38T0021602	TSS	Verified GENCODE TSS	rs2586031	AC015845.2	LOC105371839, MRPS23	Obstetric antiphospholipid syndrome	28424481	Sugiura-Ogasawara M
Yes	ZH38T0021637	TSS	Verified unannotated TSS	rs430973	TEX14	PPM1E	Systolic blood pressure	30224653	Evangelou E
No	ZH38T0021646	TSS	Verified GENCODE TSS	rs7503190	TRIM37	TRIM37	General cognitive ability	29844566	Davies G
No	ZH38T0021721	Intron	Verified unannotated TSS	rs1000423	TBX2	C17orf82, TBX2	Systolic blood pressure	28739976	Wain LV
No	ZH38T0021736	Intron	Verified unannotated TSS	rs113301871	TLK2	Intergenic, TLK2	Self-reported math ability	30038396	Lee JJ
No	ZH38T0021736	Intron	Verified unannotated TSS	rs113301871	TLK2	Intergenic, TLK2	Cognitive performance (MTAG)	30038396	Lee JJ
Yes	ZH38T0021749	TSS	Verified GENCODE TSS	rs4316	AC113554.1	ACE	Angiotensin-converting enzyme activity	20066004	Chung CM
Yes	ZH38T0021749	TSS	Verified GENCODE TSS	rs4316	AC113554.1	ACE	Blood metabolite levels; Blood metabolite levels; Blood metabolite levels; Blood metabolite levels	24816252	Shin SY
Yes	ZH38T0021749	TSS	Verified GENCODE TSS	rs4316	AC113554.1	ACE	Blood metabolite levels	24816252	Shin SY
Yes	ZH38T0021749	TSS	Verified GENCODE TSS	rs4316	AC113554.1	ACE	Blood metabolite ratios	24816252	Shin SY
Yes	ZH38T0021749	TSS	Verified GENCODE TSS	rs4316	AC113554.1	ACE	Serum metabolite levels; Serum metabolite levels	23093944	Krumsiek J
Yes	ZH38T0021749	TSS	Verified GENCODE TSS	rs4316	AC113554.1	ACE	Serum metabolite levels	23093944	Krumsiek J
Yes	ZH38T0021749	TSS	Verified GENCODE TSS	rs4316	AC113554.1	ACE	Serum metabolite levels; Serum metabolite levels	23093944	Krumsiek J
Yes	ZH38T0021749	TSS	Verified GENCODE TSS	rs4316	AC113554.1	ACE	Blood protein levels	30072576	Emilsson V
No	ZH38T0021749	TSS	Verified GENCODE TSS	rs4316	ACE	ACE	Angiotensin-converting enzyme activity	20066004	Chung CM
No	ZH38T0021749	TSS	Verified GENCODE TSS	rs4316	ACE	ACE	Blood metabolite levels; Blood metabolite levels; Blood metabolite levels; Blood metabolite levels	24816252	Shin SY
No	ZH38T0021749	TSS	Verified GENCODE TSS	rs4316	ACE	ACE	Blood metabolite levels	24816252	Shin SY
No	ZH38T0021749	TSS	Verified GENCODE TSS	rs4316	ACE	ACE	Blood metabolite ratios	24816252	Shin SY
No	ZH38T0021749	TSS	Verified GENCODE TSS	rs4316	ACE	ACE	Serum metabolite levels; Serum metabolite levels	23093944	Krumsiek J
No	ZH38T0021749	TSS	Verified GENCODE TSS	rs4316	ACE	ACE	Serum metabolite levels	23093944	Krumsiek J
No	ZH38T0021749	TSS	Verified GENCODE TSS	rs4316	ACE	ACE	Serum metabolite levels; Serum metabolite levels	23093944	Krumsiek J
No	ZH38T0021749	TSS	Verified GENCODE TSS	rs4316	ACE	ACE	Blood protein levels	30072576	Emilsson V
No	ZH38T0021853	TSS	Verified GENCODE TSS	rs8178822	APOH	PSMD7P1, CEP112, APOH	Blood protein levels; Blood protein levels	28240269	Suhre K
No	ZH38T0021853	TSS	Verified GENCODE TSS	rs8178822	APOH	APOH	Blood protein levels	29875488	Sun BB
No	ZH38T0021853	TSS	Verified GENCODE TSS	rs8178822	APOH	APOH	Activated partial thromboplastin time; Creatine kinase levels	29403010	Kanai M
No	ZH38T0021853	TSS	Verified GENCODE TSS	rs8178822	APOH	APOH	Blood protein levels; Blood protein levels; Blood protein levels; Blood protein levels; Blood protein levels; Blood protein levels; Blood protein levels; Blood protein levels; Blood protein levels	30072576	Emilsson V
No	ZH38T0021881	TSS	Verified GENCODE TSS	rs12752	KPNA2	Intergenic, KPNA2	Self-reported math ability	30038396	Lee JJ
No	ZH38T0022049	Proximal	Verified unannotated TSS	rs7216673	TSEN54	TSEN54	Lung function (FEV1)	28166213	Wain LV
Yes	ZH38T0022079	TSS	Verified GENCODE TSS	rs2165634	RECQL5	SAP30BP	Rotator cuff tears	26350878	Tashjian RZ
Yes	ZH38T0022079	TSS	Verified GENCODE TSS	rs2165635	RECQL5	SAP30BP	Rotator cuff tears	26350878	Tashjian RZ
No	ZH38T0022080	TSS	Verified GENCODE TSS	rs2165634	SAP30BP	SAP30BP	Rotator cuff tears	26350878	Tashjian RZ
No	ZH38T0022080	TSS	Verified GENCODE TSS	rs2165635	SAP30BP	SAP30BP	Rotator cuff tears	26350878	Tashjian RZ
No	ZH38T0022080	TSS	Verified GENCODE TSS	rs864234	SAP30BP	SAP30BP	Rotator cuff tears	26350878	Tashjian RZ
No	ZH38T0022157	TSS	Verified GENCODE TSS	rs3744061	SRSF2	MFSD11, JMJD6, SFRS2, MXRA7, SRSF2	Retinal arteriolar caliber	23776548	Sim X
No	ZH38T0022206	TSS	Verified GENCODE TSS	rs2748424	TMC6	TMC6	Red blood cell count; Mean corpuscular volume; Mean corpuscular hemoglobin	29403010	Kanai M
No	ZH38T0022206	TSS	Verified GENCODE TSS	rs2748425	TMC6	TMC6	Red blood cell count; Mean corpuscular volume; Mean corpuscular hemoglobin	29403010	Kanai M
No	ZH38T0022206	TSS	Verified GENCODE TSS	rs2748424	TMC6	TMC6	Red blood cell count; Mean corpuscular volume; Mean corpuscular hemoglobin	29403010	Kanai M
No	ZH38T0022206	TSS	Verified GENCODE TSS	rs2748425	TMC6	TMC6	Red blood cell count; Mean corpuscular volume; Mean corpuscular hemoglobin	29403010	Kanai M
No	ZH38T0022269	Proximal	Verified unannotated TSS	rs8074547	ENPP7	ENPP7	Blood protein levels	29875488	Sun BB
No	ZH38T0022269	Proximal	Verified unannotated TSS	rs8074547	ENPP7	NR, HP09025 - ENPP7	Blood protein levels	29875488	Sun BB
No	ZH38T0022269	Proximal	Verified unannotated TSS	rs8074547	ENPP7	ENPP7, HP09025 - ENPP7	Blood protein levels	30072576	Emilsson V
No	ZH38T0022342	Intron	Verified unannotated TSS	rs11657730	BAHCC1	RP11-1055B8.6, LOC100130370 - BAHCC1	Systolic blood pressure	30224653	Evangelou E
Yes	ZH38T0022367	Proximal	Verified unannotated TSS	rs60389196	TSPAN10	NPLOC4	Non-albumin protein levels	29403010	Kanai M
No	ZH38T0022432	Intron	Verified unannotated TSS	rs62079996	CCDC57	CCDC57	Blood metabolite levels	24816252	Shin SY
No	ZH38T0022432	Intron	Verified unannotated TSS	rs7218075	CCDC57	CCDC57	Blood metabolite levels	24816252	Shin SY
No	ZH38T0022432	Intron	Verified unannotated TSS	rs62079996	CCDC57	FASN, FASN - CCDC57	Blood protein levels	30072576	Emilsson V
No	ZH38T0022432	Intron	Verified unannotated TSS	rs7218075	CCDC57	FASN, FASN - CCDC57	Blood protein levels	30072576	Emilsson V
No	ZH38T0022446	TSS	Verified GENCODE TSS	rs116473040	SECTM1	CD7, SECTM1	Blood protein levels	30072576	Emilsson V
Yes	ZH38T0022449	TSS	Verified GENCODE TSS	rs114078868	TEX19	CD7, SECTM1	Blood protein levels	30072576	Emilsson V
Yes	ZH38T0022449	TSS	Verified GENCODE TSS	rs114632593	TEX19	CD7, SECTM1	Blood protein levels	30072576	Emilsson V
Yes	ZH38T0022449	TSS	Verified GENCODE TSS	rs74001634	TEX19	CD7, SECTM1	Blood protein levels	30072576	Emilsson V
No	ZH38T0022449	TSS	Verified GENCODE TSS	rs114078868	TEX19	SECTM1, TEX19 - UTS2R	Blood protein levels	30072576	Emilsson V
No	ZH38T0022449	TSS	Verified GENCODE TSS	rs114632593	TEX19	SECTM1, TEX19 - UTS2R	Blood protein levels	30072576	Emilsson V
No	ZH38T0022449	TSS	Verified GENCODE TSS	rs74001634	TEX19	SECTM1, TEX19 - UTS2R	Blood protein levels	30072576	Emilsson V
No	ZH38T0022571	TSS	Verified GENCODE TSS	rs1061666	LINC00667	NR, LINC00667 - ZBTB14	General cognitive ability	29844566	Davies G
Yes	ZH38T0022692	TSS	Verified GENCODE TSS	rs11663049	CEP192	EIF4A2P1 - SEH1L, SEH1L	Cognitive ability; Cognitive ability (MTAG)	29186694	Lam M
Yes	ZH38T0022692	TSS	Verified GENCODE TSS	rs11663049	CEP192	NR, SEH1L	General cognitive ability	29844566	Davies G
Yes	ZH38T0022692	TSS	Verified GENCODE TSS	rs11663049	CEP192	Intergenic, EIF4A2P1 - SEH1L	Cognitive performance (MTAG)	30038396	Lee JJ
No	ZH38T0022692	TSS	Verified GENCODE TSS	rs11663049	CEP192	Intergenic, CEP192	Educational attainment (MTAG)	30038396	Lee JJ
No	ZH38T0022692	TSS	Verified GENCODE TSS	rs11663049	CEP192	CEP192	General cognitive ability	29844566	Davies G
Yes	ZH38T0022732	Proximal	Verified unannotated TSS	rs11662724	ESCO1	ABHD3	Phospholipid levels (plasma)	22359512	Demirkan A
Yes	ZH38T0022925	Intron	Verified unannotated TSS	rs2726223	LINC01902	Intergenic, LINC00669 - LOC105372079	Self-reported math ability; Highest math class taken; Self-reported math ability (MTAG)	30038396	Lee JJ
No	ZH38T0022953	Intergenic	Verified unannotated TSS	rs269979	SLC14A2	Intergenic, SLC14A2	Cognitive performance (MTAG)	30038396	Lee JJ
Yes	ZH38T0022958	TSS	Verified GENCODE TSS	rs3819179	SLC14A1	NR, LOC105372093	Mean corpuscular volume	29403010	Kanai M
Yes	ZH38T0022965	TSS	Verified GENCODE TSS	rs8085444	PSTPIP2	intergenic, HAUS1	Migraine - clinic-based	23793025	Anttila V
No	ZH38T0022980	Proximal	Verified unannotated TSS	rs4890706	KATNAL2	, Intergenic, KATNAL2	Educational attainment (MTAG); Educational attainment (years of education)	30038396	Lee JJ
No	ZH38T0022982	TSS	Verified GENCODE TSS	rs3809965	HDHD2	SKOR2, HDHD2	Blood protein levels	29875488	Sun BB
No	ZH38T0022982	TSS	Verified GENCODE TSS	rs3809965	HDHD2	IER3IP1, HDHD2	Blood protein levels	30072576	Emilsson V
Yes	ZH38T0023245	Intron	Verified unannotated TSS	rs60779794	CD226	RTTN	Mean platelet volume; Platelet distribution width	27863252	Astle WJ
Yes	ZH38T0023245	Intron	Verified unannotated TSS	rs60779794	CD226	RTTN	Mean platelet volume; Platelet distribution width	27863252	Astle WJ
Yes	ZH38T0023321	Intron	Verified unannotated TSS	rs79617804	AC018445.1	NFATC1, TST, LOC101927897	Crohn's disease; Inflammatory bowel disease	26192919	Liu JZ
No	ZH38T0023671	TSS	Verified GENCODE TSS	rs3760776	FUT6	FUT6	Vitamin B12 levels	22367966	Lin X
No	ZH38T0023671	TSS	Verified GENCODE TSS	rs778798	FUT6	FUT6	Itch intensity from mosquito bite; Mosquito bite size; Itch intensity from mosquito bite adjusted by bite size; Itch intensity from mosquito bite adjusted by bite size; Itch intensity from mosquito bite adjusted by bite size	28199695	Jones AV
No	ZH38T0023767	Intron	Verified unannotated TSS	rs58130577	AC119396.1	ARHGEF18, AC119396.1	Sexual dysfunction (SSRI/SNRI-related)	22445761	Kurose K
Yes	ZH38T0024107	TSS	Verified GENCODE TSS	rs2974750	FARSA	KLF1 - GCDH, GCDH	Mean corpuscular hemoglobin	19862010	Ganesh SK
Yes	ZH38T0024107	TSS	Verified GENCODE TSS	rs2974750	FARSA	KLF1 - GCDH, KLF1, GCDH, AD000092.3	Mean corpuscular hemoglobin; Red blood cell count; Mean corpuscular volume	27863252	Astle WJ
Yes	ZH38T0024107	TSS	Verified GENCODE TSS	rs2974750	FARSA	KLF1 - GCDH, KLF1, GCDH, AD000092.3	Mean corpuscular hemoglobin; Red blood cell count; Mean corpuscular volume	27863252	Astle WJ
No	ZH38T0024107	TSS	Verified GENCODE TSS	rs2974750	FARSA	NR, MIR5695 - FARSA	Mean corpuscular volume; Mean corpuscular hemoglobin	29403010	Kanai M
No	ZH38T0024107	TSS	Verified GENCODE TSS	rs2974750	FARSA	NR, MIR5695 - FARSA	Mean corpuscular volume; Mean corpuscular hemoglobin	29403010	Kanai M
Yes	ZH38T0024204	Intron	Verified unannotated TSS	rs1978624	DNAJB1	NR, TECR	Maximum cranial width	29698431	Roosenboom J
Yes	ZH38T0024297	TSS	Verified GENCODE TSS	rs11540855	MRPL34	BABAM1	Epithelial ovarian cancer	25581431	Kuchenbaecker KB
No	ZH38T0024382	TSS	Verified GENCODE TSS	rs2303696	ISYNA1	ISYNA1, ELL	Blood metabolite levels	24816252	Shin SY
Yes	ZH38T0024455	Intron	Verified unannotated TSS	rs11667100	AC011447.3	CTC-260E6.6, ZNF90, LOC105372310, ZNF486, ZNF826P	Night sleep phenotypes	27126917	Spada J
No	ZH38T0024491	TSS	Verified GENCODE TSS	rs6511291	ZNF100	ZNF100	Rosacea symptom severity	29771307	Aponte JL
No	ZH38T0024491	TSS	Verified GENCODE TSS	rs6511291	ZNF100	ZNF100	Diastolic blood pressure	30224653	Evangelou E
No	ZH38T0024563	TSS	Verified GENCODE TSS	rs741445	ZNF507	, Intergenic, RNA5SP472 - ZNF507	Educational attainment (MTAG); Educational attainment (years of education)	30038396	Lee JJ
No	ZH38T0024567	TSS	Verified GENCODE TSS	rs10402931	PDCD5	PDCD5	Mean corpuscular hemoglobin	27863252	Astle WJ
No	ZH38T0024567	TSS	Verified GENCODE TSS	rs10405535	PDCD5	PDCD5	Mean corpuscular hemoglobin	27863252	Astle WJ
Yes	ZH38T0024731	Proximal	Verified unannotated TSS	rs2293686	PSENEN	IGFLR1	Blood protein levels	29875488	Sun BB
Yes	ZH38T0024731	Proximal	Verified unannotated TSS	rs2293686	PSENEN	LIN37, IGFLR1	Blood protein levels	30072576	Emilsson V
Yes	ZH38T0024735	TSS	Verified GENCODE TSS	rs3746277	LIN37	IGFLR1	Blood protein levels	29875488	Sun BB
No	ZH38T0024735	TSS	Verified GENCODE TSS	rs3746277	LIN37	LIN37, IGFLR1	Blood protein levels	30072576	Emilsson V
Yes	ZH38T0024871	TSS	Verified GENCODE TSS	rs2304176	C19orf33	SPINT2, SPINT2 - YIF1B	Blood protein levels	29875488	Sun BB
Yes	ZH38T0024871	TSS	Verified GENCODE TSS	rs2304176	C19orf33	SPINT2, SPINT2 - YIF1B	Blood protein levels	30072576	Emilsson V
No	ZH38T0024871	TSS	Verified GENCODE TSS	rs2304176	C19orf33	KCNK6 - CATSPERG, KCNK6, YIF1B, C19orf33, AC005625.1, CTB-102L5.4, CATSPERG	Blood protein levels	28240269	Suhre K
No	ZH38T0024871	TSS	Verified GENCODE TSS	rs2304176	C19orf33	YIF1B, C19orf33	Mean platelet volume	27863252	Astle WJ
Yes	ZH38T0024898	TSS	Verified GENCODE TSS	rs56113315	AC008649.2	CAPN12, LGALS4	Blood protein levels	30072576	Emilsson V
No	ZH38T0025058	TSS	Verified GENCODE TSS	rs1869710	C19orf54	RAB4B, C19orf54, MIA, ADCK4, RAB4B-EGLN2, ITPKC, MIA-RAB4B, SNRPA, RNU6-195P	Blood protein levels	28240269	Suhre K
No	ZH38T0025061	TSS	Verified GENCODE TSS	rs1455434	SNRPA	RAB4B, C19orf54, MIA, ADCK4, RAB4B-EGLN2, ITPKC, MIA-RAB4B, SNRPA, RNU6-195P	Blood protein levels	28240269	Suhre K
No	ZH38T0025064	TSS	Verified GENCODE TSS	rs2233153	MIA	RAB4B, C19orf54, MIA, ADCK4, RAB4B-EGLN2, ITPKC, MIA-RAB4B, SNRPA, RNU6-195P	Blood protein levels	28240269	Suhre K
No	ZH38T0025065	TSS	Verified GENCODE TSS	rs2233154	MIA	MIA, NR	Blood protein levels	28240269	Suhre K
No	ZH38T0025065	TSS	Verified GENCODE TSS	rs2233154	MIA	MIA, SNRPA - MIA	Blood protein levels	29875488	Sun BB
No	ZH38T0025065	TSS	Verified GENCODE TSS	rs2233154	MIA	MIA	Blood protein levels	30072576	Emilsson V
Yes	ZH38T0025111	TSS	Verified GENCODE TSS	rs10853751	EXOSC5	B3GNT8	Blood protein levels	30072576	Emilsson V
Yes	ZH38T0025115	TSS	Verified GENCODE TSS	rs13344547	DMAC2	B3GNT8	Blood protein levels	30072576	Emilsson V
Yes	ZH38T0025115	TSS	Verified GENCODE TSS	rs13346603	DMAC2	B3GNT8	Blood protein levels	30072576	Emilsson V
No	ZH38T0025174	Intergenic	Verified unannotated TSS	rs61088131	POU2F2	POU2F2	Prostate cancer; Prostate cancer (advanced)	29892016	Schumacher FR
No	ZH38T0025240	Proximal	Verified unannotated TSS	rs12609056	SMG9	KCNN4, SMG9, SMG9 - KCNN4	Mean corpuscular volume; Mean corpuscular hemoglobin concentration	29403010	Kanai M
No	ZH38T0025241	TSS	Verified GENCODE TSS	rs2277745	SMG9	KCNN4, SMG9, SMG9 - KCNN4	Mean corpuscular volume; Mean corpuscular hemoglobin concentration	29403010	Kanai M
Yes	ZH38T0025302	TSS	Verified GENCODE TSS	rs440446	APOE	TOMM40	Alzheimer's disease biomarkers	21123754	Kim S
No	ZH38T0025305	TSS	Verified GENCODE TSS	rs34954997	APOC1	NR, APOC1	Blood protein levels	29875488	Sun BB
No	ZH38T0025310	TSS	Verified GENCODE TSS	rs79429216	APOC4-APOC2	NR, APOC4-APOC2, APOC4	Blood protein levels; Blood protein levels; Blood protein levels; Blood protein levels	29875488	Sun BB
No	ZH38T0025310	TSS	Verified GENCODE TSS	rs79429216	APOC4	NR, APOC4-APOC2, APOC4	Blood protein levels; Blood protein levels; Blood protein levels; Blood protein levels	29875488	Sun BB
No	ZH38T0025395	TSS	Verified GENCODE TSS	rs2072562	PGLYRP1	LOC105372421, PGLYRP1	Blood protein levels	29875488	Sun BB
No	ZH38T0025395	TSS	Verified GENCODE TSS	rs2072562	PGLYRP1	LOC105372421, PGLYRP1	Blood protein levels	30072576	Emilsson V
No	ZH38T0025410	Intron	Verified unannotated TSS	rs62136101	PPP5C	HIF3A - PPP5C, CALM3, PPP5C, PNMAL1, PTGIR, PNMAL2, PPP5D1, AC011484.1, CCDC8, AC011551.3, GNG8	Crohn's disease	28067908	de Lange KM
No	ZH38T0025410	Intron	Verified unannotated TSS	rs62136101	PPP5C	HIF3A - PPP5C, NR	Crohn's disease; Inflammatory bowel disease	26192919	Liu JZ
Yes	ZH38T0025458	Intron	Verified unannotated TSS	rs55731973	AC008755.1	NR, ZC3H4	Body mass index	26426971	Winkler TW
Yes	ZH38T0025458	Intron	Verified unannotated TSS	rs55731973	AC008755.1	TMEM160, ZC3H4	Body mass index	20935630	Speliotes EK
Yes	ZH38T0025458	Intron	Verified unannotated TSS	rs55731973	AC008755.1	TMEM160, ZC3H4	Body mass index	24861553	Wen W
Yes	ZH38T0025458	Intron	Verified unannotated TSS	rs55731973	AC008755.1	ZC3H4	Body mass index	26961502	Wood AR
Yes	ZH38T0025568	TSS	Verified GENCODE TSS	rs838144	IZUMO1	RASIP1	Inflammatory skin disease	25574825	Baurecht H
Yes	ZH38T0025568	TSS	Verified GENCODE TSS	rs838144	IZUMO1	FUT2, FGF21	Homocysteine levels	23824729	van Meurs JB
Yes	ZH38T0025568	TSS	Verified GENCODE TSS	rs838144	IZUMO1	RASIP1	Mean platelet volume	27863252	Astle WJ
Yes	ZH38T0025568	TSS	Verified GENCODE TSS	rs838144	IZUMO1	FGF21	Dietary macronutrient intake; Dietary macronutrient intake; Dietary macronutrient intake	29988085	Merino J
No	ZH38T0025568	TSS	Verified GENCODE TSS	rs838144	IZUMO1	RASIP1, FLJ36070, CA11, IZUMO1, FUT2, FUT1, FGF21	Retinal vascular caliber	21060863	Ikram MK
No	ZH38T0025568	TSS	Verified GENCODE TSS	rs838144	IZUMO1	IZUMO1, RASIP1, FUT2, FUT1, FGF21	Dietary macronutrient intake	23372041	Chu AY
No	ZH38T0025568	TSS	Verified GENCODE TSS	rs8106205	IZUMO1	IZUMO1, NR	Dietary macronutrient intake	23636237	Tanaka T
No	ZH38T0025568	TSS	Verified GENCODE TSS	rs838144	IZUMO1	IZUMO1, FGF21	Dietary macronutrient intake; Dietary macronutrient intake	23636237	Tanaka T
No	ZH38T0025568	TSS	Verified GENCODE TSS	rs838144	IZUMO1	IZUMO1, NR	Dietary macronutrient intake	23636237	Tanaka T
Yes	ZH38T0025606	TSS	Verified GENCODE TSS	rs2287755	GYS1	NR, RUVBL2	Follicule stimulating hormone	24049095	Chen Z
Yes	ZH38T0025606	TSS	Verified GENCODE TSS	rs2287755	GYS1	LHB, RUVBL2	Blood protein levels	29875488	Sun BB
Yes	ZH38T0025606	TSS	Verified GENCODE TSS	rs2287755	GYS1	LHB, RUVBL2	Blood protein levels	29875488	Sun BB
Yes	ZH38T0025606	TSS	Verified GENCODE TSS	rs2287755	GYS1	CGB, RUVBL2	Blood protein levels	29875488	Sun BB
Yes	ZH38T0025606	TSS	Verified GENCODE TSS	rs2287755	GYS1	LHB, RUVBL2	Blood protein levels; Blood protein levels; Blood protein levels	30072576	Emilsson V
No	ZH38T0025607	Proximal	Verified unannotated TSS	rs3810176	RUVBL2	NR, RUVBL2	Follicule stimulating hormone	24049095	Chen Z
No	ZH38T0025607	Proximal	Verified unannotated TSS	rs3810176	RUVBL2	LHB, RUVBL2	Blood protein levels	29875488	Sun BB
No	ZH38T0025607	Proximal	Verified unannotated TSS	rs3810176	RUVBL2	LHB, RUVBL2	Blood protein levels	29875488	Sun BB
No	ZH38T0025607	Proximal	Verified unannotated TSS	rs3810176	RUVBL2	CGB, RUVBL2	Blood protein levels	29875488	Sun BB
No	ZH38T0025607	Proximal	Verified unannotated TSS	rs3810176	RUVBL2	LHB, RUVBL2	Blood protein levels; Blood protein levels; Blood protein levels	30072576	Emilsson V
No	ZH38T0025608	TSS	Verified GENCODE TSS	rs3764617	RUVBL2	NR, RUVBL2	Follicule stimulating hormone	24049095	Chen Z
No	ZH38T0025608	TSS	Verified GENCODE TSS	rs3764618	RUVBL2	NR, RUVBL2	Follicule stimulating hormone	24049095	Chen Z
No	ZH38T0025608	TSS	Verified GENCODE TSS	rs3764617	RUVBL2	LHB, RUVBL2	Blood protein levels	29875488	Sun BB
No	ZH38T0025608	TSS	Verified GENCODE TSS	rs3764617	RUVBL2	LHB, RUVBL2	Blood protein levels	29875488	Sun BB
No	ZH38T0025608	TSS	Verified GENCODE TSS	rs3764617	RUVBL2	CGB, RUVBL2	Blood protein levels	29875488	Sun BB
No	ZH38T0025608	TSS	Verified GENCODE TSS	rs3764618	RUVBL2	LHB, RUVBL2	Blood protein levels	29875488	Sun BB
No	ZH38T0025608	TSS	Verified GENCODE TSS	rs3764618	RUVBL2	LHB, RUVBL2	Blood protein levels	29875488	Sun BB
No	ZH38T0025608	TSS	Verified GENCODE TSS	rs3764618	RUVBL2	CGB, RUVBL2	Blood protein levels	29875488	Sun BB
No	ZH38T0025608	TSS	Verified GENCODE TSS	rs3764617	RUVBL2	LHB, RUVBL2	Blood protein levels; Blood protein levels; Blood protein levels	30072576	Emilsson V
No	ZH38T0025608	TSS	Verified GENCODE TSS	rs3764618	RUVBL2	LHB, RUVBL2	Blood protein levels; Blood protein levels; Blood protein levels	30072576	Emilsson V
Yes	ZH38T0025698	Proximal	Verified unannotated TSS	rs2304206	IRF3	NR, BCL2L12	General cognitive ability	29844566	Davies G
Yes	ZH38T0025699	TSS	Verified GENCODE TSS	rs2304204	IRF3	NR, BCL2L12	General cognitive ability	29844566	Davies G
Yes	ZH38T0025826	Intron	Verified unannotated TSS	rs17632542	KLK2	KLK3	Prostate cancer aggressiveness	25939597	Berndt SI
Yes	ZH38T0025826	Intron	Verified unannotated TSS	rs1810020	KLK2	KLK3	Prostate-specific antigen levels	24919509	Terao C
No	ZH38T0025826	Intron	Verified unannotated TSS	rs17632542	KLK3	KLK3	Prostate cancer aggressiveness	25939597	Berndt SI
No	ZH38T0025826	Intron	Verified unannotated TSS	rs1810020	KLK3	KLK3 - KLK2, KLK3	Prostate-specific antigen levels	23269536	Sun J
No	ZH38T0025826	Intron	Verified unannotated TSS	rs1810020	KLK2	KLK3 - KLK2, KLK3	Prostate-specific antigen levels	23269536	Sun J
No	ZH38T0025826	Intron	Verified unannotated TSS	rs1810020	KLK3	KLK3	Prostate-specific antigen levels	24919509	Terao C
No	ZH38T0025826	Intron	Verified unannotated TSS	rs17632542	KLK3	KLK2, KLK3, KLK3 - KLK2; KLK2; LOC105372441; KLK3; LOC105372441; LOC105372441; KLK3	Prostate-specific antigen levels; Prostate-specific antigen levels; Prostate-specific antigen levels; Prostate-specific antigen levels; Prostate-specific antigen levels; Prostate-specific antigen levels; Prostate-specific antigen levels; Prostate-specific antigen levels; Prostate-specific antigen levels; Prostate-specific antigen levels	28139693	Hoffmann TJ
No	ZH38T0025826	Intron	Verified unannotated TSS	rs17632542	KLK2	KLK2, KLK3, KLK3 - KLK2; KLK2; LOC105372441; KLK3; LOC105372441; LOC105372441; KLK3	Prostate-specific antigen levels; Prostate-specific antigen levels; Prostate-specific antigen levels; Prostate-specific antigen levels; Prostate-specific antigen levels; Prostate-specific antigen levels; Prostate-specific antigen levels; Prostate-specific antigen levels; Prostate-specific antigen levels; Prostate-specific antigen levels	28139693	Hoffmann TJ
No	ZH38T0025826	Intron	Verified unannotated TSS	rs61752561	KLK3	KLK2, KLK3, KLK3 - KLK2; KLK2; LOC105372441; KLK3; LOC105372441; LOC105372441; KLK3	Prostate-specific antigen levels (conditioned on lead SNPs); Prostate-specific antigen levels; Prostate-specific antigen levels; Prostate-specific antigen levels; Prostate-specific antigen levels; Prostate-specific antigen levels; Prostate-specific antigen levels; Prostate-specific antigen levels; Prostate-specific antigen levels; Prostate-specific antigen levels	28139693	Hoffmann TJ
No	ZH38T0025826	Intron	Verified unannotated TSS	rs61752561	KLK2	KLK2, KLK3, KLK3 - KLK2; KLK2; LOC105372441; KLK3; LOC105372441; LOC105372441; KLK3	Prostate-specific antigen levels (conditioned on lead SNPs); Prostate-specific antigen levels; Prostate-specific antigen levels; Prostate-specific antigen levels; Prostate-specific antigen levels; Prostate-specific antigen levels; Prostate-specific antigen levels; Prostate-specific antigen levels; Prostate-specific antigen levels; Prostate-specific antigen levels	28139693	Hoffmann TJ
No	ZH38T0025833	Intron	Verified unannotated TSS	rs6070	KLK2	KLKP1, KLK2	Prostate-specific antigen levels	23359319	Jin G
No	ZH38T0025833	Intron	Verified unannotated TSS	rs6070	KLK2	KLK2, KLK3, KLK3 - KLK2; KLK2; LOC105372441; KLK3; LOC105372441; LOC105372441; KLK3	Prostate-specific antigen levels (conditioned on lead SNPs); Prostate-specific antigen levels; Prostate-specific antigen levels; Prostate-specific antigen levels; Prostate-specific antigen levels; Prostate-specific antigen levels; Prostate-specific antigen levels; Prostate-specific antigen levels; Prostate-specific antigen levels; Prostate-specific antigen levels	28139693	Hoffmann TJ
No	ZH38T0025834	Intron	Verified unannotated TSS	rs198974	KLK2	KLKP1, KLK2	Prostate-specific antigen levels	23359319	Jin G
No	ZH38T0025834	Intron	Verified unannotated TSS	rs198975	KLK2	KLKP1, KLK2	Prostate-specific antigen levels	23359319	Jin G
No	ZH38T0025834	Intron	Verified unannotated TSS	rs198976	KLK2	KLKP1, KLK2	Prostate-specific antigen levels	23359319	Jin G
No	ZH38T0025834	Intron	Verified unannotated TSS	rs198974	KLK2	KLK2, KLK3, KLK3 - KLK2; KLK2; LOC105372441; KLK3; LOC105372441; LOC105372441; KLK3	Prostate-specific antigen levels (conditioned on lead SNPs); Prostate-specific antigen levels; Prostate-specific antigen levels; Prostate-specific antigen levels; Prostate-specific antigen levels; Prostate-specific antigen levels; Prostate-specific antigen levels; Prostate-specific antigen levels; Prostate-specific antigen levels; Prostate-specific antigen levels	28139693	Hoffmann TJ
No	ZH38T0025834	Intron	Verified unannotated TSS	rs198975	KLK2	KLK2, KLK3, KLK3 - KLK2; KLK2; LOC105372441; KLK3; LOC105372441; LOC105372441; KLK3	Prostate-specific antigen levels (conditioned on lead SNPs); Prostate-specific antigen levels; Prostate-specific antigen levels; Prostate-specific antigen levels; Prostate-specific antigen levels; Prostate-specific antigen levels; Prostate-specific antigen levels; Prostate-specific antigen levels; Prostate-specific antigen levels; Prostate-specific antigen levels	28139693	Hoffmann TJ
No	ZH38T0025834	Intron	Verified unannotated TSS	rs198976	KLK2	KLK2, KLK3, KLK3 - KLK2; KLK2; LOC105372441; KLK3; LOC105372441; LOC105372441; KLK3	Prostate-specific antigen levels (conditioned on lead SNPs); Prostate-specific antigen levels; Prostate-specific antigen levels; Prostate-specific antigen levels; Prostate-specific antigen levels; Prostate-specific antigen levels; Prostate-specific antigen levels; Prostate-specific antigen levels; Prostate-specific antigen levels; Prostate-specific antigen levels	28139693	Hoffmann TJ
No	ZH38T0025842	TSS	Verified GENCODE TSS	rs28384475	KLK6	LOC105372442, NR, KLK6	Blood protein levels	29875488	Sun BB
No	ZH38T0025845	TSS	Verified GENCODE TSS	rs1624358	KLK7	CTB-147C22.9, KLK7	Blood protein levels	28240269	Suhre K
No	ZH38T0025845	TSS	Verified GENCODE TSS	rs1275221	KLK7	NR, KLK7	Blood protein levels	29875488	Sun BB
No	ZH38T0025845	TSS	Verified GENCODE TSS	rs1624358	KLK7	KLK7	Blood protein levels	29875488	Sun BB
No	ZH38T0025845	TSS	Verified GENCODE TSS	rs1275221	KLK7	KLK7	Blood protein levels	30072576	Emilsson V
Yes	ZH38T0025846	TSS	Verified GENCODE TSS	rs34542531	KLK7	KLK8, NR	Blood protein levels	29875488	Sun BB
No	ZH38T0025846	TSS	Verified GENCODE TSS	rs34542531	KLK8	KLK8, NR	Blood protein levels	29875488	Sun BB
Yes	ZH38T0025847	TSS	Verified GENCODE TSS	rs74705037	KLK7	KLK8	Blood protein levels; Blood protein levels	29875488	Sun BB
No	ZH38T0025847	TSS	Verified GENCODE TSS	rs74705037	KLK8	KLK8	Blood protein levels; Blood protein levels	29875488	Sun BB
Yes	ZH38T0025871	TSS	Verified GENCODE TSS	rs7249916	AC063977.3	NR, LOC107985327	Body mass index	19851299	Johansson A
Yes	ZH38T0025871	TSS	Verified GENCODE TSS	rs7249916	AC063977.4	NR, LOC107985327	Body mass index	19851299	Johansson A
Yes	ZH38T0025872	TSS	Verified GENCODE TSS	rs7249149	LINC01872	NR, LOC107985327	Body mass index	19851299	Johansson A
No	ZH38T0025894	TSS	Verified GENCODE TSS	rs1551559	SIGLEC6	SIGLEC6, CTD-3073N11.9	Blood protein levels	28240269	Suhre K
Yes	ZH38T0026009	TSS	Verified GENCODE TSS	rs641738	TMC4	MBOAT7	Blood metabolite levels	24816252	Shin SY
No	ZH38T0026009	TSS	Verified GENCODE TSS	rs641738	TMC4	TMC4 - MBOAT7, MBOAT7	Cirrhosis (alcohol related)	26482880	Buch S
No	ZH38T0026009	TSS	Verified GENCODE TSS	rs641738	TMC4	TMC4, MBOAT7	Blood metabolite ratios	24816252	Shin SY
No	ZH38T0026025	TSS	Verified GENCODE TSS	rs448083	LILRB2	LILRB2	Blood protein levels	29875488	Sun BB
No	ZH38T0026025	TSS	Verified GENCODE TSS	rs448092	LILRB2	LILRB2	Blood protein levels	29875488	Sun BB
Yes	ZH38T0026033	Proximal	Verified unannotated TSS	rs192436652	LENG8	Intergenic, CDC42EP5	Educational attainment (MTAG)	30038396	Lee JJ
Yes	ZH38T0026047	TSS	Verified GENCODE TSS	rs111997702	LILRA2	LOC107985347, NR, LOC105372461	Blood protein levels	29875488	Sun BB
No	ZH38T0026047	TSS	Verified GENCODE TSS	rs111997702	LILRA2	LILRA2, LILRB1	Blood protein levels	30072576	Emilsson V
Yes	ZH38T0026052	Intergenic	Verified unannotated TSS	rs71195783	LILRB4	NR, LILRB1 - MIR8061	Blood protein levels	29875488	Sun BB
Yes	ZH38T0026052	Intergenic	Verified unannotated TSS	rs71195783	AC245036.3	NR, LILRB1 - MIR8061	Blood protein levels	29875488	Sun BB
Yes	ZH38T0026052	Intergenic	Verified unannotated TSS	rs71195783	VN1R105P	NR, LILRB1 - MIR8061	Blood protein levels	29875488	Sun BB
No	ZH38T0026123	TSS	Verified GENCODE TSS	rs35117389	TMEM190	TMEM190	Blood protein levels	29875488	Sun BB
No	ZH38T0026123	TSS	Verified GENCODE TSS	rs35117389	TMEM190	TMEM190, IL11 - TMEM190	Blood protein levels	30072576	Emilsson V
Yes	ZH38T0026312	TSS	Verified GENCODE TSS	rs7595075	SH3YL1	ACP1	Blood protein levels	30072576	Emilsson V
No	ZH38T0026312	TSS	Verified GENCODE TSS	rs7595075	SH3YL1	SH3YL1, AC079779.4, ACP1, FAM150B	Blood protein levels	28240269	Suhre K
No	ZH38T0026312	TSS	Verified GENCODE TSS	rs7595075	SH3YL1	NR, SH3YL1	Blood protein levels	28240269	Suhre K
Yes	ZH38T0026470	Proximal	Verified unannotated TSS	rs77966298	LINC01954	, PDIA6, Intergenic	Educational attainment (MTAG); Highest math class taken (MTAG); Educational attainment (years of education)	30038396	Lee JJ
Yes	ZH38T0026470	Proximal	Verified unannotated TSS	rs1734382	LINC01954	PDIA6, Intergenic	Self-reported math ability; Self-reported math ability (MTAG); Cognitive performance (MTAG)	30038396	Lee JJ
Yes	ZH38T0026470	Proximal	Verified unannotated TSS	rs2952623	LINC01954	PDIA6, Intergenic	Self-reported math ability; Self-reported math ability (MTAG); Cognitive performance (MTAG)	30038396	Lee JJ
Yes	ZH38T0026470	Proximal	Verified unannotated TSS	rs1734382	LINC01954	PDIA6, Intergenic	Self-reported math ability; Self-reported math ability (MTAG); Cognitive performance (MTAG)	30038396	Lee JJ
Yes	ZH38T0026470	Proximal	Verified unannotated TSS	rs2952623	LINC01954	PDIA6, Intergenic	Self-reported math ability; Self-reported math ability (MTAG); Cognitive performance (MTAG)	30038396	Lee JJ
Yes	ZH38T0026531	Proximal	Verified unannotated TSS	rs151141490	DDX1	NBAS	Recalcitrant atopic dermatitis	25935106	Kim KW
Yes	ZH38T0026531	Proximal	Verified unannotated TSS	rs151141490	AC008278.2	NBAS	Recalcitrant atopic dermatitis	25935106	Kim KW
No	ZH38T0026642	TSS	Verified GENCODE TSS	rs17240441	APOB	APOB	Lipid metabolism phenotypes; Lipid metabolism phenotypes	19936222	Chasman DI
No	ZH38T0026690	Intron	Verified unannotated TSS	rs9631062	ADCY3	DNAJC27, ADCY3	Body mass index	22344219	Wen W
No	ZH38T0026690	Intron	Verified unannotated TSS	rs9631062	ADCY3	RBJ, ADCY3	Body mass index	24861553	Wen W
No	ZH38T0026690	Intron	Verified unannotated TSS	rs9631062	ADCY3	DNAJC27, ADCY3 - DNAJC27, ADCY3	Body mass index	28892062	Akiyama M
No	ZH38T0026714	Proximal	Verified unannotated TSS	rs4665299	RAB10	RAB10	Mean corpuscular hemoglobin	27863252	Astle WJ
No	ZH38T0026714	Proximal	Verified unannotated TSS	rs4665299	RAB10	RAB10	Mean corpuscular volume	27863252	Astle WJ
No	ZH38T0026758	TSS	Verified GENCODE TSS	rs6742004	KHK	KHK	Self-reported risk-taking behaviour	30181555	Strawbridge RJ
Yes	ZH38T0026804	TSS	Verified GENCODE TSS	rs3749147	CCDC121	ZNF512, GCKR	Phospholipid levels (plasma)	22359512	Demirkan A
Yes	ZH38T0026805	TSS	Verified GENCODE TSS	rs3749147	GPN1	ZNF512, GCKR	Phospholipid levels (plasma)	22359512	Demirkan A
No	ZH38T0026973	Intron	Verified unannotated TSS	rs12712530	PRKD3	NDUFAF7, QPCT, PRKD3	Chronic lymphocytic leukemia	24292274	Speedy HE
No	ZH38T0027179	Intergenic	Verified unannotated TSS	rs4606978	PPP1R21	Intergenic, FOXN2 - PPP1R21	Educational attainment (MTAG); Highest math class taken (MTAG)	30038396	Lee JJ
No	ZH38T0027307	TSS	Verified GENCODE TSS	rs67574266	REL	REL	Rheumatoid arthritis; Rheumatoid arthritis (ACPA-positive)	23143596	Eyre S
No	ZH38T0027307	TSS	Verified GENCODE TSS	rs67574266	REL	REL	Rheumatoid arthritis; Rheumatoid arthritis (ACPA-positive)	23143596	Eyre S
Yes	ZH38T0027349	TSS	Verified GENCODE TSS	rs1386401	TMEM17	Intergenic, LOC105374764	Self-reported math ability; Self-reported math ability (MTAG)	30038396	Lee JJ
Yes	ZH38T0027349	TSS	Verified GENCODE TSS	rs1386401	AC092155.1	Intergenic, LOC105374764	Self-reported math ability; Self-reported math ability (MTAG)	30038396	Lee JJ
No	ZH38T0027440	TSS	Verified GENCODE TSS	rs4519508	PPP3R1	ENSG00000273398, PPP3R1	General cognitive ability	29844566	Davies G
No	ZH38T0027449	TSS	Verified GENCODE TSS	rs10048745	ARHGAP25	ARHGAP25	Blood protein levels	30072576	Emilsson V
Yes	ZH38T0027589	Proximal	Verified unannotated TSS	rs4547554	ALMS1P1	NAT8, ALMS1P	Blood metabolite levels; Blood metabolite levels; Blood metabolite levels	24816252	Shin SY
Yes	ZH38T0027589	Proximal	Verified unannotated TSS	rs4547554	ALMS1P1	NAT8	Blood metabolite levels; Blood metabolite ratios	24816252	Shin SY
Yes	ZH38T0027589	Proximal	Verified unannotated TSS	rs4547554	ALMS1P1	NAT8	Blood metabolite levels; Blood metabolite ratios	24816252	Shin SY
Yes	ZH38T0027589	Proximal	Verified unannotated TSS	rs4547554	ALMS1P1	NAT8, ALMS1P	Glomerular filtration rate; Glomerular filtration rate; Glomerular filtration rate	23535967	Tin A
Yes	ZH38T0027589	Proximal	Verified unannotated TSS	rs4547554	ALMS1P1	NAT8B, NAT8, ALMS1	Chronic kidney disease	20383146	Kottgen A
Yes	ZH38T0027589	Proximal	Verified unannotated TSS	rs4547554	ALMS1P1	ALMS1 - NAT8, Intergenic	Educational attainment (MTAG); Cognitive performance; Cognitive performance (MTAG); Highest math class taken (MTAG)	30038396	Lee JJ
Yes	ZH38T0027589	Proximal	Verified unannotated TSS	rs4547554	ALMS1P1	ALMS1 - NAT8, NR	General cognitive ability	29844566	Davies G
Yes	ZH38T0027589	Proximal	Verified unannotated TSS	rs4547554	ALMS1P1	ALMS1 - NAT8, Intergenic	Educational attainment (MTAG); Cognitive performance; Cognitive performance (MTAG); Highest math class taken (MTAG)	30038396	Lee JJ
Yes	ZH38T0027589	Proximal	Verified unannotated TSS	rs4547554	ALMS1P1	NAT8, ALMS1	Serum metabolite levels	23093944	Krumsiek J
Yes	ZH38T0027589	Proximal	Verified unannotated TSS	rs4547554	ALMS1P1	NAT8, ALMS1	Serum metabolite levels; Serum metabolite levels	23093944	Krumsiek J
Yes	ZH38T0027589	Proximal	Verified unannotated TSS	rs4547554	ALMS1P1	NAT8, ALMS1	Serum metabolite levels	23093944	Krumsiek J
Yes	ZH38T0027808	TSS	Verified GENCODE TSS	rs111532456	CHMP3	KDM3A, VPS24	Blood protein levels	30072576	Emilsson V
No	ZH38T0028048	TSS	Verified GENCODE TSS	rs13003982	AFF3	AFF3 - LINC01104, AFF3	Type 1 diabetes	25751624	Onengut-Gumuscu S
No	ZH38T0028093	TSS	Verified GENCODE TSS	rs11123908	IL1R1	IL1R1	Fibrinogen levels	26561523	de Vries PS
No	ZH38T0028093	TSS	Verified GENCODE TSS	rs11123908	IL1R1	IL1R2, IL1R1	Fibrinogen levels; Fibrinogen levels	28107422	de Vries PS
No	ZH38T0028095	Intron	Verified unannotated TSS	rs2234650	IL1R1	IL1R1	Blood protein levels	30072576	Emilsson V
Yes	ZH38T0028104	Intergenic	Verified unannotated TSS	rs10189629	IL1RL1	IL1RL2 - FAM183DP, FAM183DP, IL1RL2	Blood protein levels	28240269	Suhre K
No	ZH38T0028245	Intergenic	Verified unannotated TSS	rs11677088	IL1RN	IL1RN, IL1F10	Blood protein levels	29875488	Sun BB
No	ZH38T0028245	Intergenic	Verified unannotated TSS	rs11693750	IL1RN	IL1RN, IL1F10	Blood protein levels	29875488	Sun BB
No	ZH38T0028245	Intergenic	Verified unannotated TSS	rs11677088	IL1RN	IL1RN, IL1F10 - RNU6-1180P	Blood protein levels	30072576	Emilsson V
No	ZH38T0028245	Intergenic	Verified unannotated TSS	rs11693750	IL1RN	IL1RN, IL1F10 - RNU6-1180P	Blood protein levels	30072576	Emilsson V
Yes	ZH38T0028259	Proximal	Verified unannotated TSS	rs199993536	AC016745.1	PAX8, LOC105373567	Diastolic blood pressure	30224653	Evangelou E
Yes	ZH38T0028318	TSS	Verified GENCODE TSS	rs2272053	TMEM177	Intergenic, CFAP221	Self-reported math ability	30038396	Lee JJ
No	ZH38T0028330	TSS	Verified GENCODE TSS	rs934722	RALB	RALB	Mean platelet volume	27863252	Astle WJ
No	ZH38T0028368	Intron	Verified unannotated TSS	rs11682128	BIN1	BIN1	Blood protein levels	30072576	Emilsson V
No	ZH38T0028377	TSS	Verified GENCODE TSS	rs1799810	PROC	PROC	Protein C levels	20802025	Tang W
No	ZH38T0028377	TSS	Verified GENCODE TSS	rs1799810	PROC	PROC	Blood protein levels	30072576	Emilsson V
Yes	ZH38T0028635	TSS	Verified GENCODE TSS	rs35240993	RBM43	TNFAIP6, NMI	Blood protein levels	29875488	Sun BB
Yes	ZH38T0028635	TSS	Verified GENCODE TSS	rs35240993	RBM43	TNFAIP6, NMI - LOC107985827	Blood protein levels	30072576	Emilsson V
No	ZH38T0028635	TSS	Verified GENCODE TSS	rs35240993	RBM43	RBM43, NMI	Blood protein levels	28240269	Suhre K
Yes	ZH38T0028781	TSS	Verified GENCODE TSS	rs11678980	LINC01806	ENSG00000235724, TANK, LOC101929512	Cognitive ability (MTAG)	29186694	Lam M
Yes	ZH38T0028781	TSS	Verified GENCODE TSS	rs11678980	LINC01806	, Intergenic, LOC101929512, LOC100996579	Educational attainment (MTAG); Self-reported math ability; Highest math class taken; Self-reported math ability (MTAG); Cognitive performance; Cognitive performance (MTAG); Highest math class taken (MTAG); Educational attainment (years of education)	30038396	Lee JJ
Yes	ZH38T0028781	TSS	Verified GENCODE TSS	rs11678980	LINC01806	, Intergenic, LOC101929512, LOC100996579	Educational attainment (MTAG); Self-reported math ability; Highest math class taken; Self-reported math ability (MTAG); Cognitive performance; Cognitive performance (MTAG); Highest math class taken (MTAG); Educational attainment (years of education)	30038396	Lee JJ
Yes	ZH38T0028781	TSS	Verified GENCODE TSS	rs11678980	LINC01806	TANK	General cognitive ability	29844566	Davies G
Yes	ZH38T0028781	TSS	Verified GENCODE TSS	rs11678980	LINC01806	, Intergenic, LOC101929512, LOC100996579	Educational attainment (MTAG); Self-reported math ability; Highest math class taken; Self-reported math ability (MTAG); Cognitive performance; Cognitive performance (MTAG); Highest math class taken (MTAG); Educational attainment (years of education)	30038396	Lee JJ
Yes	ZH38T0028815	TSS	Verified GENCODE TSS	rs11903961	AC019197.1	SLC38A11, LOC101929633 - RNA5SP110, COBLL1	Heschl's gyrus morphology	25130324	Cai DC
Yes	ZH38T0028819	Intron	Verified unannotated TSS	rs443916	AC019197.1	SLC38A11, LOC101929633 - RNA5SP110, COBLL1	Heschl's gyrus morphology	25130324	Cai DC
No	ZH38T0028903	TSS	Verified GENCODE TSS	rs3749034	GAD1	NR, GAD1	General cognitive ability	29844566	Davies G
No	ZH38T0028903	TSS	Verified GENCODE TSS	rs3749034	GAD1	Intergenic, ERICH2 - GAD1	Self-reported math ability (MTAG); Cognitive performance (MTAG); Highest math class taken (MTAG)	30038396	Lee JJ
Yes	ZH38T0028971	TSS	Verified GENCODE TSS	rs72915559	SP9	, Intergenic, LOC102724194	Educational attainment (MTAG); Educational attainment (years of education)	30038396	Lee JJ
No	ZH38T0029210	TSS	Verified GENCODE TSS	rs291466	HIBCH	HIBCH	Blood protein levels	30072576	Emilsson V
No	ZH38T0029284	Intron	Verified unannotated TSS	rs788023	SF3B1	SF3B1	Major depressive disorder	27479909	Hyde CL
Yes	ZH38T0029292	TSS	Verified GENCODE TSS	rs1116734	HSPD1	SF3B1	Major depressive disorder	27479909	Hyde CL
Yes	ZH38T0029293	TSS	Verified GENCODE TSS	rs1116734	HSPE1	SF3B1	Major depressive disorder	27479909	Hyde CL
Yes	ZH38T0029293	TSS	Verified GENCODE TSS	rs1116734	HSPE1-MOB4	SF3B1	Major depressive disorder	27479909	Hyde CL
Yes	ZH38T0029327	TSS	Verified GENCODE TSS	rs1124639	AC097717.1	NR, C2orf47 - LOC105373833	General cognitive ability	29844566	Davies G
No	ZH38T0029334	Proximal	Verified unannotated TSS	rs3739121	SPATS2L	SPATS2L	Information processing speed	27046643	Davies G
No	ZH38T0029334	Proximal	Verified unannotated TSS	rs3739121	SPATS2L	Intergenic, LOC105373833 - SPATS2L	Cognitive performance (MTAG); Highest math class taken (MTAG)	30038396	Lee JJ
No	ZH38T0029336	TSS	Verified GENCODE TSS	rs10931898	SPATS2L	SPATS2L	Information processing speed	27046643	Davies G
No	ZH38T0029336	TSS	Verified GENCODE TSS	rs12614621	SPATS2L	SPATS2L	Information processing speed	27046643	Davies G
No	ZH38T0029336	TSS	Verified GENCODE TSS	rs10931898	SPATS2L	Intergenic, LOC105373833 - SPATS2L	Cognitive performance (MTAG); Highest math class taken (MTAG)	30038396	Lee JJ
No	ZH38T0029336	TSS	Verified GENCODE TSS	rs12614621	SPATS2L	Intergenic, LOC105373833 - SPATS2L	Cognitive performance (MTAG); Highest math class taken (MTAG)	30038396	Lee JJ
No	ZH38T0029378	Proximal	Verified unannotated TSS	rs3769823	CASP8	CASP8	Basal cell carcinoma	28177523	Lin Y
No	ZH38T0029378	Proximal	Verified unannotated TSS	rs3769823	CASP8	ALS2CR12, CASP8	Non-melanoma skin cancer	29739929	Visconti A
Yes	ZH38T0029417	TSS	Verified GENCODE TSS	rs145741252	ICA1L	WDR12	Coronary heart disease	21378990	Schunkert H
Yes	ZH38T0029417	TSS	Verified GENCODE TSS	rs149846585	ICA1L	WDR12	Coronary heart disease	21378990	Schunkert H
No	ZH38T0029526	TSS	Verified GENCODE TSS	rs12469767	MYL1	MYL1	Serum metabolite levels	23093944	Krumsiek J
Yes	ZH38T0029538	Proximal	Verified unannotated TSS	rs6735267	ERBB4	NR, LOC107985979	Body mass index	26426971	Winkler TW
No	ZH38T0029538	Proximal	Verified unannotated TSS	rs6735267	ERBB4	MIR4776-2, LOC107985979, ERBB4	Body mass index	28892062	Akiyama M
No	ZH38T0029573	TSS	Verified GENCODE TSS	rs1250259	FN1	AC012462.1, FN1	Blood protein levels; Blood protein levels; Blood protein levels	28240269	Suhre K
No	ZH38T0029573	TSS	Verified GENCODE TSS	rs1250259	FN1	LOC105373868 - LOC102724849, FN1	LDL cholesterol levels	28334899	Spracklen CN
No	ZH38T0029573	TSS	Verified GENCODE TSS	rs1250259	FN1	FN1	Blood protein levels; Blood protein levels; Blood protein levels; Blood protein levels; Blood protein levels; Blood protein levels; Blood protein levels	30072576	Emilsson V
Yes	ZH38T0029666	TSS	Verified GENCODE TSS	rs11554825	GPBAR1	SLC11A1, ARPC2, CXCR2, CXCR1, PNKD, CTDSP1, TMBIM1	Inflammatory bowel disease	23128233	Jostins L
No	ZH38T0029666	TSS	Verified GENCODE TSS	rs11554825	GPBAR1	ARPC2 - GPBAR1, NR	Inflammatory bowel disease	26192919	Liu JZ
Yes	ZH38T0029667	TSS	Verified GENCODE TSS	rs1877714	AAMP	ARPC2 - GPBAR1, NR	Inflammatory bowel disease	26192919	Liu JZ
Yes	ZH38T0029667	TSS	Verified GENCODE TSS	rs1877714	AAMP	SLC11A1, ARPC2, CXCR2, CXCR1, PNKD, CTDSP1, TMBIM1	Inflammatory bowel disease	23128233	Jostins L
Yes	ZH38T0029691	TSS	Verified GENCODE TSS	rs500317	USP37	TTLL4, ZNF142, STK36	Amyotrophic lateral sclerosis	22959728	Ahmeti KB
Yes	ZH38T0029691	TSS	Verified GENCODE TSS	rs500317	USP37	CTDSP1 - VIL1, intergenic	Amyotrophic lateral sclerosis	22959728	Ahmeti KB
Yes	ZH38T0029691	TSS	Verified GENCODE TSS	rs500422	USP37	TTLL4, ZNF142, STK36	Amyotrophic lateral sclerosis	22959728	Ahmeti KB
Yes	ZH38T0029691	TSS	Verified GENCODE TSS	rs500422	USP37	CTDSP1 - VIL1, intergenic	Amyotrophic lateral sclerosis	22959728	Ahmeti KB
No	ZH38T0029691	TSS	Verified GENCODE TSS	rs500317	USP37	NR, USP37	Body mass index	26426971	Winkler TW
No	ZH38T0029691	TSS	Verified GENCODE TSS	rs500422	USP37	NR, USP37	Body mass index	26426971	Winkler TW
Yes	ZH38T0029692	TSS	Verified GENCODE TSS	rs524012	CNOT9	NR, USP37	Body mass index	26426971	Winkler TW
Yes	ZH38T0029692	TSS	Verified GENCODE TSS	rs524902	CNOT9	NR, USP37	Body mass index	26426971	Winkler TW
Yes	ZH38T0029692	TSS	Verified GENCODE TSS	rs524012	CNOT9	TTLL4, ZNF142, STK36	Amyotrophic lateral sclerosis	22959728	Ahmeti KB
Yes	ZH38T0029692	TSS	Verified GENCODE TSS	rs524012	CNOT9	CTDSP1 - VIL1, intergenic	Amyotrophic lateral sclerosis	22959728	Ahmeti KB
Yes	ZH38T0029692	TSS	Verified GENCODE TSS	rs524902	CNOT9	TTLL4, ZNF142, STK36	Amyotrophic lateral sclerosis	22959728	Ahmeti KB
Yes	ZH38T0029692	TSS	Verified GENCODE TSS	rs524902	CNOT9	CTDSP1 - VIL1, intergenic	Amyotrophic lateral sclerosis	22959728	Ahmeti KB
Yes	ZH38T0029693	TSS	Verified GENCODE TSS	rs526897	CNOT9	NR, USP37	Body mass index	26426971	Winkler TW
Yes	ZH38T0029693	TSS	Verified GENCODE TSS	rs526897	CNOT9	TTLL4, ZNF142, STK36	Amyotrophic lateral sclerosis	22959728	Ahmeti KB
Yes	ZH38T0029693	TSS	Verified GENCODE TSS	rs526897	CNOT9	CTDSP1 - VIL1, intergenic	Amyotrophic lateral sclerosis	22959728	Ahmeti KB
Yes	ZH38T0029736	TSS	Verified GENCODE TSS	rs11552796	GLB1L	TUBA4A, TUBA4B	Platelet distribution width	27863252	Astle WJ
No	ZH38T0029762	Intergenic	Verified unannotated TSS	rs13386459	SPEG	SPEG	Resting heart rate	29769521	Ramirez J
No	ZH38T0029819	TSS	Verified GENCODE TSS	rs3768886	CUL3	, Intergenic, CUL3	Educational attainment (MTAG); Educational attainment (years of education)	30038396	Lee JJ
No	ZH38T0029871	Intron	Verified unannotated TSS	rs34360232	TRIP12	DNER - TRIP12, DNER	Hand grip strength	29691431	Tikkanen E
No	ZH38T0029872	TSS	Verified GENCODE TSS	rs58826872	TRIP12	TRIP12	Systolic blood pressure	30224653	Evangelou E
No	ZH38T0029989	TSS	Verified GENCODE TSS	rs2289477	ATG16L1	ATG16L1	Crohn's disease; Inflammatory bowel disease	28067908	de Lange KM
No	ZH38T0029989	TSS	Verified GENCODE TSS	rs2289477	ATG16L1	ATG16L1	Pediatric autoimmune diseases	26301688	Li YR
No	ZH38T0029989	TSS	Verified GENCODE TSS	rs2289477	ATG16L1	ATG16L1, NR	Inflammatory bowel disease	26192919	Liu JZ
No	ZH38T0029990	TSS	Verified unannotated TSS	rs3792109	ATG16L1	ATG16L1	Crohn's disease; Inflammatory bowel disease	28067908	de Lange KM
No	ZH38T0029990	TSS	Verified unannotated TSS	rs3792109	ATG16L1	ATG16L1	Pediatric autoimmune diseases	26301688	Li YR
No	ZH38T0029990	TSS	Verified unannotated TSS	rs3792109	ATG16L1	ATG16L1, NR	Inflammatory bowel disease	26192919	Liu JZ
Yes	ZH38T0030015	TSS	Verified GENCODE TSS	rs11673726	AC114812.1	UGT1A10, UGT1A, UGT1A8, UGT1A9, UGT1A4, UGT1A5, NR, UGT1A7, UGT1A6	Total bilirubin levels	29403010	Kanai M
No	ZH38T0030016	TSS	Verified GENCODE TSS	rs34983651	UGT1A1	UGT1A10, UGT1A, UGT1A8, UGT1A9, UGT1A4, UGT1A5, UGT1A6, UGT1A7, UGT1A3	Blood protein levels; Blood protein levels; Blood protein levels; Blood protein levels; Blood protein levels	29875488	Sun BB
No	ZH38T0030092	Proximal	Verified unannotated TSS	rs3754701	RAMP1	RBM44 - RAMP1, RAMP1, RBM44	Resting metabolic rate	28476931	Piaggi P
No	ZH38T0030136	TSS	Verified GENCODE TSS	rs7565704	GPR35	DUSP28, CAPN10 - GPR35	Blood protein levels	30072576	Emilsson V
Yes	ZH38T0030153	Intron	Verified unannotated TSS	rs6708265	PASK	SNED1, MTERF4	Blood protein levels	29875488	Sun BB
Yes	ZH38T0030272	TSS	Verified GENCODE TSS	rs11697395	AL049634.1	LOC105372499, SIRPD, RP4-576H24.2	Mean platelet volume	27863252	Astle WJ
Yes	ZH38T0030272	TSS	Verified GENCODE TSS	rs11697395	AL049634.1	LOC105372499, SIRPD, RP4-576H24.2	Platelet distribution width	27863252	Astle WJ
No	ZH38T0030272	TSS	Verified GENCODE TSS	rs11697395	SIRPD	LOC105372499, SIRPD, RP4-576H24.2	Mean platelet volume	27863252	Astle WJ
No	ZH38T0030272	TSS	Verified GENCODE TSS	rs11697395	SIRPD	LOC105372499, SIRPD, RP4-576H24.2	Platelet distribution width	27863252	Astle WJ
No	ZH38T0030356	Proximal	Verified unannotated TSS	rs1999664	PRNT	RASSF2, PRNT - LOC105372511	Systemic lupus erythematosus	24871463	Armstrong DL
No	ZH38T0030525	TSS	Verified GENCODE TSS	rs6132239	RIN2	NAT5, RIN2	Verbal declarative memory	25648963	Debette S
Yes	ZH38T0030562	TSS	Verified GENCODE TSS	rs2277764	LINC00261	FOXA2, LINC01384	Fasting plasma glucose	25187374	Hwang JY
No	ZH38T0030562	TSS	Verified GENCODE TSS	rs2277764	FOXA2	FOXA2, LINC01384	Fasting plasma glucose	25187374	Hwang JY
No	ZH38T0030562	TSS	Verified GENCODE TSS	rs2277764	FOXA2	FOXA2, LINC00261 - FOXA2	Fasting blood glucose; Fasting blood glucose (BMI interaction)	22581228	Manning AK
No	ZH38T0030562	TSS	Verified GENCODE TSS	rs2277764	LINC00261	FOXA2, LINC00261 - FOXA2	Fasting blood glucose; Fasting blood glucose (BMI interaction)	22581228	Manning AK
Yes	ZH38T0030584	TSS	Verified GENCODE TSS	rs5030707	CST3	RP11-218C14.2, CST9LP2 - CST9	Blood protein levels	29875488	Sun BB
Yes	ZH38T0030584	TSS	Verified GENCODE TSS	rs71334202	CST3	RP11-218C14.2, CST9LP2 - CST9	Blood protein levels	29875488	Sun BB
No	ZH38T0030584	TSS	Verified GENCODE TSS	rs5030707	CST3	CST3, CST9, CST4	Chronic kidney disease	20383146	Kottgen A
No	ZH38T0030584	TSS	Verified GENCODE TSS	rs71334202	CST3	CST3, CST9, CST4	Chronic kidney disease	20383146	Kottgen A
No	ZH38T0030584	TSS	Verified GENCODE TSS	rs5030707	CST3	CST3, RP11-218C14.2, CST9, RP11-218C14.8	Blood protein levels	28240269	Suhre K
No	ZH38T0030584	TSS	Verified GENCODE TSS	rs71334202	CST3	CST3, RP11-218C14.2, CST9, RP11-218C14.8	Blood protein levels	28240269	Suhre K
No	ZH38T0030584	TSS	Verified GENCODE TSS	rs5030707	CST3	CST3	Blood protein levels; Blood protein levels; Blood protein levels	30072576	Emilsson V
No	ZH38T0030584	TSS	Verified GENCODE TSS	rs71334202	CST3	CST3	Blood protein levels; Blood protein levels; Blood protein levels	30072576	Emilsson V
No	ZH38T0030585	TSS	Verified GENCODE TSS	rs6076122	CST1	CST1, CST2P1, LOC105372574 - CST1	Blood protein levels; Blood protein levels	28240269	Suhre K
No	ZH38T0030585	TSS	Verified GENCODE TSS	rs6076123	CST1	CST1, CST2P1, LOC105372574 - CST1	Blood protein levels; Blood protein levels	28240269	Suhre K
Yes	ZH38T0030594	Intergenic	Verified unannotated TSS	rs59765118	AL035661.1	CST7, LOC105372578	Blood protein levels	29875488	Sun BB
Yes	ZH38T0030595	TSS	Verified GENCODE TSS	rs227650	CST7	APMAP - ACSS1, APMAP	Blood protein levels; Blood protein levels	29875488	Sun BB
Yes	ZH38T0030595	TSS	Verified GENCODE TSS	rs227652	CST7	APMAP - ACSS1, APMAP	Blood protein levels; Blood protein levels	29875488	Sun BB
No	ZH38T0030595	TSS	Verified GENCODE TSS	rs227651	CST7	APMAP - ACSS1, APMAP, RNU6-1257P, CST7, RP4-568C11.4	Blood protein levels	28240269	Suhre K
No	ZH38T0030595	TSS	Verified GENCODE TSS	rs227650	CST7	CST7, LOC105372578 - CST7	Blood protein levels	29875488	Sun BB
No	ZH38T0030595	TSS	Verified GENCODE TSS	rs227652	CST7	CST7, LOC105372578 - CST7	Blood protein levels	29875488	Sun BB
No	ZH38T0030595	TSS	Verified GENCODE TSS	rs227651	CST7	CST7, LOC105372578	Blood protein levels	30072576	Emilsson V
Yes	ZH38T0030596	TSS	Verified GENCODE TSS	rs6138456	APMAP	CST7, LOC105372578 - CST7	Blood protein levels	29875488	Sun BB
No	ZH38T0030596	TSS	Verified GENCODE TSS	rs6138456	APMAP	APMAP - ACSS1, APMAP	Blood protein levels; Blood protein levels	29875488	Sun BB
Yes	ZH38T0030797	TSS	Verified GENCODE TSS	rs2295356	RBM12	CPNE1	Blood protein levels	29875488	Sun BB
Yes	ZH38T0030797	TSS	Verified GENCODE TSS	rs2295356	RBM12	CPNE1, RBM39	Blood protein levels	30072576	Emilsson V
No	ZH38T0030797	TSS	Verified GENCODE TSS	rs2295356	CPNE1	NFS1, FER1L4, ROMO1, RNU6-759P, RPF2P1 - PHF20, Y_RNA, SPAG4, RNU6-937P, HIGD1AP16, PHF20, SCAND1, RBM12, CNBD2, COX7BP2, RPF2P1, RN7SKP271, RNU4-40P, RBM39, CPNE1, RP1-309K20.6	Blood protein levels	28240269	Suhre K
No	ZH38T0030797	TSS	Verified GENCODE TSS	rs2295356	RBM12	NFS1, FER1L4, ROMO1, RNU6-759P, RPF2P1 - PHF20, Y_RNA, SPAG4, RNU6-937P, HIGD1AP16, PHF20, SCAND1, RBM12, CNBD2, COX7BP2, RPF2P1, RN7SKP271, RNU4-40P, RBM39, CPNE1, RP1-309K20.6	Blood protein levels	28240269	Suhre K
No	ZH38T0030797	TSS	Verified GENCODE TSS	rs2295356	CPNE1	CPNE1	Blood protein levels	29875488	Sun BB
No	ZH38T0030797	TSS	Verified GENCODE TSS	rs2295356	CPNE1	CPNE1, RBM39	Blood protein levels	30072576	Emilsson V
Yes	ZH38T0030811	Proximal	Verified unannotated TSS	rs2425123	RBM39	intergenic, PHF20	Migraine - clinic-based	23793025	Anttila V
Yes	ZH38T0030812	TSS	Verified GENCODE TSS	rs72096088	RBM39	PHF20	General cognitive ability	29844566	Davies G
Yes	ZH38T0030812	TSS	Verified GENCODE TSS	rs72096088	RBM39	Intergenic, SPAG4 - CPNE1	Cognitive performance (MTAG)	30038396	Lee JJ
No	ZH38T0030816	Intron	Verified unannotated TSS	rs2425171	PHF20	PHF20	General cognitive ability	29844566	Davies G
Yes	ZH38T0030818	Intron	Verified unannotated TSS	rs10565957	PHF20	CPNE1, RBM39	Blood protein levels	30072576	Emilsson V
No	ZH38T0030818	Intron	Verified unannotated TSS	rs10565957	PHF20	NFS1, FER1L4, ROMO1, RNU6-759P, RPF2P1 - PHF20, Y_RNA, SPAG4, RNU6-937P, HIGD1AP16, PHF20, SCAND1, RBM12, CNBD2, COX7BP2, RPF2P1, RN7SKP271, RNU4-40P, RBM39, CPNE1, RP1-309K20.6	Blood protein levels	28240269	Suhre K
Yes	ZH38T0030821	Proximal	Verified unannotated TSS	rs35448195	SCAND1	CPNE1, RBM39	Blood protein levels	30072576	Emilsson V
No	ZH38T0030821	Proximal	Verified unannotated TSS	rs35448195	SCAND1	NFS1, FER1L4, ROMO1, RNU6-759P, RPF2P1 - PHF20, Y_RNA, SPAG4, RNU6-937P, HIGD1AP16, PHF20, SCAND1, RBM12, CNBD2, COX7BP2, RPF2P1, RN7SKP271, RNU4-40P, RBM39, CPNE1, RP1-309K20.6	Blood protein levels	28240269	Suhre K
No	ZH38T0030910	TSS	Verified GENCODE TSS	rs2232580	LBP	LBP, BPI - LBP	Blood protein levels	29875488	Sun BB
Yes	ZH38T0030950	TSS	Verified GENCODE TSS	rs6029636	LPIN3	MAFB, TOP1	LDL cholesterol levels; LDL cholesterol levels; LDL cholesterol levels; LDL cholesterol levels	28334899	Spracklen CN
Yes	ZH38T0030950	TSS	Verified GENCODE TSS	rs6029636	LPIN3	ZHX3, TOP1	Total cholesterol levels; Total cholesterol levels	28334899	Spracklen CN
No	ZH38T0031008	TSS	Verified GENCODE TSS	rs6031849	YWHAB	YWHAB	Blood protein levels	30072576	Emilsson V
No	ZH38T0031018	TSS	Verified GENCODE TSS	rs17333103	PI3	SLPI, SEMG1, SEMG2, LOC105372630, PI3, RP1-300I2.3, RP1-300I2.2	Blood protein levels	28240269	Suhre K
No	ZH38T0031018	TSS	Verified GENCODE TSS	rs17333103	PI3	PI3, LOC101929863 - PI3	Blood protein levels	29875488	Sun BB
No	ZH38T0031018	TSS	Verified GENCODE TSS	rs17333103	PI3	LOC101929866, PI3	Blood protein levels	30072576	Emilsson V
[truncated: 895 more rows]

## Sheet: Table S5D
Supplemental Table S5D. GWAS associations for rs2620666
SNP	Lead SNP	LD	Phenotype	PMID	First Author
[truncated: 7 more rows]

## Sheet: Table S5E
Supplemental Table S5E. RAMPAGE signal at ZH38T0048822
[truncated: 116 more rows]

[truncated: 3 more sheets: Table S5F, Table S5G, Table S5H]
